# Supplementary material for: Genome analysis of biosurfactant producing bacterium, Bacillus tequilensis
Source: PLoS One. 2023 Jun 2;18(6):e0285994. doi: 10.1371/journal.pone.0285994 (PMC10237388; doi:10.1371/journal.pone.0285994)
Supplement: S1 Table — (XLSX) [file pone.0285994.s001.xlsx]

## Sheet: Sheet1
Contig_Id	Feature_Id	Type	Location	Start	Stop	Strand	Name	Figfam	Function
scaffold100|size793	fig|6666666.156949.peg.1	peg	scaffold100|size793_80_349	80	349	+	hypothetical protein	NA	NA
scaffold101|size793	fig|6666666.156949.rna.2	rna	scaffold101|size793_793_1	793	1	-	Large Subunit Ribosomal RNA; lsuRNA; LSU rRNA	NA	NA
scaffold101|size793	fig|6666666.156949.rna.1	rna	scaffold101|size793_793_1	793	1	-	Large Subunit Ribosomal RNA; lsuRNA; LSU rRNA	NA	NA
scaffold104|size787	fig|6666666.156949.peg.2	peg	scaffold104|size787_62_574	62	574	+	Maltose phosphorylase (EC 2.4.1.8) / Trehalose phosphorylase (EC 2.4.1.64)	FIG00043765	isu;Trehalose_Biosynthesis isu;Trehalose_Uptake_and_Utilization idu(1);Maltose_and_Maltodextrin_Utilization
scaffold10|size16020	fig|6666666.156949.peg.3	peg	scaffold10|size16020_103_3930	103	3930	+	Bacitracin synthetase 3 (BA3) [Includes: ATP-dependent isoleucine adenylase (IleA) (Isoleucine activase); ATP-dependent D-phenylalanine adenylase (D-PheA) (D-phenylalanine activase); ATP-dependent histidine adenylase (HisA) (Histidine activase); ATP-dependent D-aspartate adenylase (D-AspA) (D-aspartate activase); ATP-dependent asparagine adenylase (AsnA) (Asparagine activase); Aspartate racemase …	FIG01954418	idu(1);Glutamine,_Glutamate,_Aspartate_and_Asparagine_Biosynthesis
scaffold10|size16020	fig|6666666.156949.peg.4	peg	scaffold10|size16020_3955_11637	3955	11637	+	Bacitracin synthetase 3 (BA3) [Includes: ATP-dependent isoleucine adenylase (IleA) (Isoleucine activase); ATP-dependent D-phenylalanine adenylase (D-PheA) (D-phenylalanine activase); ATP-dependent histidine adenylase (HisA) (Histidine activase); ATP-dependent D-aspartate adenylase (D-AspA) (D-aspartate activase); ATP-dependent asparagine adenylase (AsnA) (Asparagine activase); Aspartate racemase …	FIG01954418	idu(1);Glutamine,_Glutamate,_Aspartate_and_Asparagine_Biosynthesis
scaffold10|size16020	fig|6666666.156949.peg.5	peg	scaffold10|size16020_11654_13393	11654	13393	+	FIG01239039: hypothetical protein	FIG01239036	NA
scaffold10|size16020	fig|6666666.156949.peg.6	peg	scaffold10|size16020_13411_14214	13411	14214	+	Non-ribosomal peptide synthetase	NA	NA
scaffold110|size767	fig|6666666.156949.peg.7	peg	scaffold110|size767_18_758	18	758	+	hypothetical protein	NA	NA
scaffold115|size749	fig|6666666.156949.rna.3	rna	scaffold115|size749_432_504	432	504	+	tRNA-His-GTG	NA	NA
scaffold117|size745	fig|6666666.156949.peg.8	peg	scaffold117|size745_17_634	17	634	+	TldD protein, part of TldE/TldD proteolytic complex	FIG00002674	isu;CBSS-316057.3.peg.563 isu;CBSS-354.1.peg.2917
scaffold11|size12789	fig|6666666.156949.peg.9	peg	scaffold11|size12789_534_154	534	154	-	FIG01247396: hypothetical protein	FIG01247395	NA
scaffold11|size12789	fig|6666666.156949.peg.10	peg	scaffold11|size12789_833_1369	833	1369	+	FIG01233227: hypothetical protein	FIG01534210	NA
scaffold11|size12789	fig|6666666.156949.peg.11	peg	scaffold11|size12789_2105_1548	2105	1548	-	Transcriptional regulator, PadR family	FIG00002474	idu(3);CBSS-1352.1.peg.856
scaffold11|size12789	fig|6666666.156949.peg.12	peg	scaffold11|size12789_2908_2102	2908	2102	-	Acetylxylan esterase related enzyme	FIG01376833	NA
scaffold11|size12789	fig|6666666.156949.peg.13	peg	scaffold11|size12789_3318_3193	3318	3193	-	hypothetical protein	NA	NA
scaffold11|size12789	fig|6666666.156949.peg.14	peg	scaffold11|size12789_3367_3768	3367	3768	+	hypothetical protein	NA	NA
scaffold11|size12789	fig|6666666.156949.peg.15	peg	scaffold11|size12789_3752_3880	3752	3880	+	hypothetical protein	NA	NA
scaffold11|size12789	fig|6666666.156949.peg.16	peg	scaffold11|size12789_3945_4223	3945	4223	+	DNA replication protein DnaC	FIG00763261	idu(1);DNA-replication
scaffold11|size12789	fig|6666666.156949.peg.17	peg	scaffold11|size12789_4220_4363	4220	4363	+	hypothetical protein	NA	NA
scaffold11|size12789	fig|6666666.156949.peg.18	peg	scaffold11|size12789_4639_4908	4639	4908	+	FIG01251269: hypothetical protein	FIG01251264	NA
scaffold11|size12789	fig|6666666.156949.peg.19	peg	scaffold11|size12789_4965_5171	4965	5171	+	FIG01237875: hypothetical protein	FIG01698394	NA
scaffold11|size12789	fig|6666666.156949.peg.20	peg	scaffold11|size12789_5427_6218	5427	6218	+	hypothetical protein	NA	NA
scaffold11|size12789	fig|6666666.156949.peg.21	peg	scaffold11|size12789_6384_6620	6384	6620	+	Phage terminase, large subunit [SA bacteriophages 11, Mu50B]	FIG01233775	NA
scaffold11|size12789	fig|6666666.156949.peg.22	peg	scaffold11|size12789_6581_6736	6581	6736	+	FIG01237406: hypothetical protein	FIG01237403	NA
scaffold11|size12789	fig|6666666.156949.peg.23	peg	scaffold11|size12789_6780_7598	6780	7598	+	N-acetylmuramoyl-L-alanine amidase( EC:3.5.1.28 )	FIG01367732	NA
scaffold11|size12789	fig|6666666.156949.peg.24	peg	scaffold11|size12789_7922_7635	7922	7635	-	hypothetical protein	NA	NA
scaffold11|size12789	fig|6666666.156949.peg.25	peg	scaffold11|size12789_9861_7936	9861	7936	-	Putative toxin component near putative ESAT-related proteins, repetitive / Repetitive hypothetical protein near ESAT cluster, SA0282 homolog	FIG00149320	NA
scaffold11|size12789	fig|6666666.156949.peg.26	peg	scaffold11|size12789_10389_9976	10389	9976	-	Uncharacterized protein yqzI	FIG01381324	NA
scaffold11|size12789	fig|6666666.156949.peg.27	peg	scaffold11|size12789_10633_10499	10633	10499	-	regulator of the activity of phosphatase RapE	NA	NA
scaffold11|size12789	fig|6666666.156949.peg.28	peg	scaffold11|size12789_11750_10623	11750	10623	-	response regulator aspartate phosphatase	FIG01228496	NA
scaffold122|size735	fig|6666666.156949.peg.29	peg	scaffold122|size735_221_21	221	21	-	hypothetical protein	NA	NA
scaffold123|size732	fig|6666666.156949.peg.30	peg	scaffold123|size732_27_551	27	551	+	FIG138517: Putative lipid carrier protein	NA	NA
scaffold123|size732	fig|6666666.156949.peg.31	peg	scaffold123|size732_502_732	502	732	+	hypothetical protein	NA	NA
scaffold125|size729	fig|6666666.156949.peg.32	peg	scaffold125|size729_451_275	451	275	-	hypothetical protein	NA	NA
scaffold125|size729	fig|6666666.156949.peg.33	peg	scaffold125|size729_721_575	721	575	-	hypothetical protein	NA	NA
scaffold127|size726	fig|6666666.156949.peg.34	peg	scaffold127|size726_655_314	655	314	-	Integral membrane protein	FIG01956050	NA
scaffold128|size725	fig|6666666.156949.peg.35	peg	scaffold128|size725_446_673	446	673	+	hypothetical protein	NA	NA
scaffold12|size11742	fig|6666666.156949.peg.36	peg	scaffold12|size11742_3979_4122	3979	4122	+	hypothetical protein	NA	NA
scaffold12|size11742	fig|6666666.156949.peg.37	peg	scaffold12|size11742_10742_8226	10742	8226	-	FIG01233961: hypothetical protein	FIG01233959	NA
scaffold12|size11742	fig|6666666.156949.peg.38	peg	scaffold12|size11742_11703_10699	11703	10699	-	FIG01233961: hypothetical protein	FIG01233959	NA
scaffold138|size713	fig|6666666.156949.peg.39	peg	scaffold138|size713_313_459	313	459	+	Photosystem II 10 kDa phosphoprotein (PsbH)	FIG00113996	NA
scaffold139|size712	fig|6666666.156949.peg.40	peg	scaffold139|size712_219_401	219	401	+	hypothetical protein	NA	NA
scaffold13|size9991	fig|6666666.156949.peg.41	peg	scaffold13|size9991_4_4128	4	4128	+	FIG01233961: hypothetical protein	NA	NA
scaffold13|size9991	fig|6666666.156949.peg.42	peg	scaffold13|size9991_7531_7403	7531	7403	-	hypothetical protein	NA	NA
scaffold142|size706	fig|6666666.156949.peg.43	peg	scaffold142|size706_700_83	700	83	-	hypothetical protein	NA	NA
scaffold143|size706	fig|6666666.156949.peg.44	peg	scaffold143|size706_60_392	60	392	+	hypothetical protein	NA	NA
scaffold149|size696	fig|6666666.156949.peg.45	peg	scaffold149|size696_1_228	1	228	+	Citrate synthase (si) (EC 2.3.3.1)	FIG00130344	idu(2);TCA_Cycle idu(2);Glyoxylate_bypass idu(2);Serine-glyoxylate_cycle
scaffold149|size696	fig|6666666.156949.peg.46	peg	scaffold149|size696_484_365	484	365	-	hypothetical protein	NA	NA
scaffold149|size696	fig|6666666.156949.peg.47	peg	scaffold149|size696_515_694	515	694	+	hypothetical protein	NA	NA
scaffold14|size8363	fig|6666666.156949.peg.48	peg	scaffold14|size8363_1830_1690	1830	1690	-	hypothetical protein	NA	NA
scaffold14|size8363	fig|6666666.156949.rna.4	rna	scaffold14|size8363_5617_2689	5617	2689	-	Large Subunit Ribosomal RNA; lsuRNA; LSU rRNA	NA	NA
scaffold14|size8363	fig|6666666.156949.peg.49	peg	scaffold14|size8363_6492_5929	6492	5929	-	hypothetical protein	NA	NA
scaffold14|size8363	fig|6666666.156949.rna.5	rna	scaffold14|size8363_8152_6598	8152	6598	-	Small Subunit Ribosomal RNA; ssuRNA; SSU rRNA	NA	NA
scaffold154|size693	fig|6666666.156949.peg.50	peg	scaffold154|size693_680_504	680	504	-	hypothetical protein	NA	NA
scaffold156|size691	fig|6666666.156949.peg.51	peg	scaffold156|size691_637_329	637	329	-	Ferredoxin	FIG00001676	idu(2);Soluble_cytochromes_and_functionally_related_electron_carriers idu(2);Inorganic_Sulfur_Assimilation
scaffold15|size5289	fig|6666666.156949.peg.52	peg	scaffold15|size5289_985_2256	985	2256	+	hypothetical protein	NA	NA
scaffold164|size677	fig|6666666.156949.peg.53	peg	scaffold164|size677_13_132	13	132	+	hypothetical protein	NA	NA
scaffold164|size677	fig|6666666.156949.peg.54	peg	scaffold164|size677_629_360	629	360	-	Fumarylacetoacetate hydrolase family protein	FIG00007658	idu(1);Gentisate_degradation idu(1);Salicylate_and_gentisate_catabolism
scaffold167|size674	fig|6666666.156949.peg.55	peg	scaffold167|size674_3_485	3	485	+	Putrescine transport ATP-binding protein PotA (TC 3.A.1.11.1)	NA	isu;Polyamine_Metabolism
scaffold16|size4357	fig|6666666.156949.peg.56	peg	scaffold16|size4357_2121_1996	2121	1996	-	hypothetical protein	NA	NA
scaffold16|size4357	fig|6666666.156949.peg.57	peg	scaffold16|size4357_2180_2761	2180	2761	+	hypothetical protein	NA	NA
scaffold16|size4357	fig|6666666.156949.peg.58	peg	scaffold16|size4357_3966_3847	3966	3847	-	hypothetical protein	NA	NA
scaffold173|size663	fig|6666666.156949.peg.59	peg	scaffold173|size663_499_332	499	332	-	hypothetical protein	NA	NA
scaffold175|size662	fig|6666666.156949.peg.60	peg	scaffold175|size662_174_500	174	500	+	hypothetical protein	NA	NA
scaffold177|size661	fig|6666666.156949.peg.61	peg	scaffold177|size661_171_557	171	557	+	COGs COG3146	FIG00070318	NA
scaffold17|size4344	fig|6666666.156949.rna.6	rna	scaffold17|size4344_3252_317	3252	317	-	Large Subunit Ribosomal RNA; lsuRNA; LSU rRNA	NA	NA
scaffold181|size655	fig|6666666.156949.peg.62	peg	scaffold181|size655_368_499	368	499	+	hypothetical protein	NA	NA
scaffold184|size651	fig|6666666.156949.peg.63	peg	scaffold184|size651_27_635	27	635	+	hypothetical protein	NA	NA
scaffold186|size651	fig|6666666.156949.peg.64	peg	scaffold186|size651_75_281	75	281	+	FIG005666: putative helicase	FIG00005666	isu;Cluster-based_Subsystem_Grouping_Hypotheticals_-_perhaps_Proteosome_Related
scaffold187|size650	fig|6666666.156949.peg.65	peg	scaffold187|size650_138_443	138	443	+	NADH-ubiquinone oxidoreductase chain K (EC 1.6.5.3)	FIG00000559	NA
scaffold18|size3403	fig|6666666.156949.peg.66	peg	scaffold18|size3403_1376_567	1376	567	-	hypothetical protein	NA	NA
scaffold190|size647	fig|6666666.156949.peg.67	peg	scaffold190|size647_535_14	535	14	-	TPR domain protein in aerotolerance operon	FIG00030033	NA
scaffold197|size644	fig|6666666.156949.peg.68	peg	scaffold197|size644_308_460	308	460	+	hypothetical protein	NA	NA
scaffold199|size644	fig|6666666.156949.peg.69	peg	scaffold199|size644_571_452	571	452	-	hypothetical protein	NA	NA
scaffold1|size1664507	fig|6666666.156949.peg.70	peg	scaffold1|size1664507_445_756	445	756	+	Flagellar hook-length control protein FliK	NA	idu(1);Flagellum
scaffold1|size1664507	fig|6666666.156949.peg.71	peg	scaffold1|size1664507_1533_862	1533	862	-	Streptomycin biosynthesis StrF domain protein	FIG01322565	NA
scaffold1|size1664507	fig|6666666.156949.peg.72	peg	scaffold1|size1664507_2237_1530	2237	1530	-	O-antigen biosynthesis protein RfbC	FIG01336754	NA
scaffold1|size1664507	fig|6666666.156949.peg.73	peg	scaffold1|size1664507_3330_2224	3330	2224	-	Glycosyl transferase, group 2 family protein	FIG00003788	idu(1);Exopolysaccharide_Biosynthesis
scaffold1|size1664507	fig|6666666.156949.peg.74	peg	scaffold1|size1664507_4703_3327	4703	3327	-	FIG01227878: hypothetical protein	FIG01227877	NA
scaffold1|size1664507	fig|6666666.156949.peg.75	peg	scaffold1|size1664507_5046_6443	5046	6443	+	FIG01250505: hypothetical protein	FIG01250503	NA
scaffold1|size1664507	fig|6666666.156949.peg.76	peg	scaffold1|size1664507_7098_6955	7098	6955	-	hypothetical protein	NA	NA
scaffold1|size1664507	fig|6666666.156949.peg.77	peg	scaffold1|size1664507_7071_7427	7071	7427	+	nuclease	FIG00847408	NA
scaffold1|size1664507	fig|6666666.156949.peg.78	peg	scaffold1|size1664507_8179_7460	8179	7460	-	Uncharacterized protein yqeB	FIG01230315	NA
scaffold1|size1664507	fig|6666666.156949.peg.79	peg	scaffold1|size1664507_8434_9327	8434	9327	+	6-phosphogluconate dehydrogenase, decarboxylating (EC 1.1.1.44)	FIG00000405	idu(2);Pentose_phosphate_pathway idu(2);D-gluconate_and_ketogluconates_metabolism
scaffold1|size1664507	fig|6666666.156949.peg.80	peg	scaffold1|size1664507_9973_9347	9973	9347	-	YqeD	FIG01247787	NA
scaffold1|size1664507	fig|6666666.156949.peg.81	peg	scaffold1|size1664507_10160_10912	10160	10912	+	N-acetylmuramoyl-L-alanine amidase CwlH implicated in mother cell lysis (EC 3.5.1.28)	FIG01246904	NA
scaffold1|size1664507	fig|6666666.156949.peg.82	peg	scaffold1|size1664507_11164_11895	11164	11895	+	hypothetical protein	NA	NA
scaffold1|size1664507	fig|6666666.156949.peg.83	peg	scaffold1|size1664507_12340_12200	12340	12200	-	hypothetical protein	NA	NA
scaffold1|size1664507	fig|6666666.156949.peg.84	peg	scaffold1|size1664507_12702_13220	12702	13220	+	FIG001553: Hydrolase, HAD subfamily IIIA	FIG00001553	NA
scaffold1|size1664507	fig|6666666.156949.peg.85	peg	scaffold1|size1664507_13224_14324	13224	14324	+	GTP-binding protein YqeH, required for biogenesis of 30S ribosome subunit	FIG00001499	isu;Universal_GTPases
scaffold1|size1664507	fig|6666666.156949.peg.86	peg	scaffold1|size1664507_14342_15184	14342	15184	+	Shikimate 5-dehydrogenase I alpha (EC 1.1.1.25)	FIG00000022	isu;Chorismate_Synthesis isu;Cluster_containing_Alanyl-tRNA_synthetase isu;Common_Pathway_For_Synthesis_of_Aromatic_Compounds_(DAHP_synthase_to_chorismate)
scaffold1|size1664507	fig|6666666.156949.peg.87	peg	scaffold1|size1664507_15178_15468	15178	15468	+	FIG004454: RNA binding protein	FIG00001879	NA
scaffold1|size1664507	fig|6666666.156949.peg.88	peg	scaffold1|size1664507_15480_16049	15480	16049	+	Nicotinate-nucleotide adenylyltransferase (EC 2.7.7.18)	FIG01279159	isu;NAD_and_NADP_cofactor_biosynthesis_global
scaffold1|size1664507	fig|6666666.156949.peg.89	peg	scaffold1|size1664507_16039_16599	16039	16599	+	Hydrolase (HAD superfamily), YqeK	FIG00014849	NA
scaffold1|size1664507	fig|6666666.156949.peg.90	peg	scaffold1|size1664507_16617_16973	16617	16973	+	Ribosomal silencing factor RsfA (former Iojap)	FIG00135315	NA
scaffold1|size1664507	fig|6666666.156949.peg.91	peg	scaffold1|size1664507_16970_17713	16970	17713	+	FIG145533: Methyltransferase (EC 2.1.1.-)	FIG00113075	NA
scaffold1|size1664507	fig|6666666.156949.peg.92	peg	scaffold1|size1664507_18600_17779	18600	17779	-	Late competence protein ComER, similarity with Pyrroline-5-carboxylate reductase	FIG00098029	NA
scaffold1|size1664507	fig|6666666.156949.peg.93	peg	scaffold1|size1664507_18684_19301	18684	19301	+	Late competence protein ComEA, DNA receptor	FIG00009544	isu;Gram_Positive_Competence
scaffold1|size1664507	fig|6666666.156949.peg.94	peg	scaffold1|size1664507_19368_19937	19368	19937	+	dCMP deaminase (EC 3.5.4.12); Late competence protein ComEB	FIG00001830	NA
scaffold1|size1664507	fig|6666666.156949.peg.95	peg	scaffold1|size1664507_19941_22268,scaffold1|size1664507_22272_22334	19941	22334	+	Late competence protein ComEC, DNA transport	FIG00009564	isu;Gram_Positive_Competence
scaffold1|size1664507	fig|6666666.156949.peg.96	peg	scaffold1|size1664507_22446_22312	22446	22312	-	hypothetical protein	NA	NA
scaffold1|size1664507	fig|6666666.156949.peg.97	peg	scaffold1|size1664507_22584_22703	22584	22703	+	hypothetical protein	NA	NA
scaffold1|size1664507	fig|6666666.156949.peg.98	peg	scaffold1|size1664507_22676_23719	22676	23719	+	DNA polymerase III delta subunit (EC 2.7.7.7)	FIG00106663	isu;DNA-replication
scaffold1|size1664507	fig|6666666.156949.peg.99	peg	scaffold1|size1664507_24000_23734	24000	23734	-	SSU ribosomal protein S20p	FIG00000213	NA
scaffold1|size1664507	fig|6666666.156949.peg.100	peg	scaffold1|size1664507_24204_25310	24204	25310	+	Endopeptidase spore protease Gpr (EC 3.4.24.78)	FIG00008507	isu;Small_acid-soluble_spore_proteins
scaffold1|size1664507	fig|6666666.156949.peg.101	peg	scaffold1|size1664507_25373_26578	25373	26578	+	Stage II sporulation protein P	FIG00013871	isu;Sporulation_gene_orphans
scaffold1|size1664507	fig|6666666.156949.peg.102	peg	scaffold1|size1664507_26595_26933	26595	26933	+	FIG01227686: hypothetical protein	FIG01227685	NA
scaffold1|size1664507	fig|6666666.156949.peg.103	peg	scaffold1|size1664507_27067_28905	27067	28905	+	Translation elongation factor LepA	FIG00000165	icw(4);Heat_shock_dnaK_gene_cluster_extended isu;Universal_GTPases isu;Translation_elongation_factors_bacterial
scaffold1|size1664507	fig|6666666.156949.peg.104	peg	scaffold1|size1664507_28958_30097	28958	30097	+	Hypothetical radical SAM family enzyme in heat shock gene cluster, similarity with CPO of BS HemN-type	FIG00437313	isu;Heat_shock_dnaK_gene_cluster_extended isu;Heme_and_Siroheme_Biosynthesis
scaffold1|size1664507	fig|6666666.156949.peg.105	peg	scaffold1|size1664507_30178_31209	30178	31209	+	Heat-inducible transcription repressor HrcA	FIG00000544	icw(1);Heat_shock_dnaK_gene_cluster_extended icw(1);GroEL_GroES
scaffold1|size1664507	fig|6666666.156949.peg.106	peg	scaffold1|size1664507_31281_31844	31281	31844	+	Heat shock protein GrpE	FIG00000103	icw(5);Heat_shock_dnaK_gene_cluster_extended isu;GroEL_GroES isu;Protein_chaperones
scaffold1|size1664507	fig|6666666.156949.peg.107	peg	scaffold1|size1664507_31868_33703	31868	33703	+	Chaperone protein DnaK	FIG00023369	icw(2);Heat_shock_dnaK_gene_cluster_extended icw(2);GroEL_GroES icw(1);Protein_chaperones
scaffold1|size1664507	fig|6666666.156949.peg.108	peg	scaffold1|size1664507_33903_35030	33903	35030	+	Chaperone protein DnaJ	FIG00000070	icw(4);Heat_shock_dnaK_gene_cluster_extended icw(3);GroEL_GroES icw(2);Protein_chaperones
scaffold1|size1664507	fig|6666666.156949.peg.109	peg	scaffold1|size1664507_35055_35990	35055	35990	+	Ribosomal protein L11 methyltransferase (EC 2.1.1.-)	FIG00000346	icw(6);Heat_shock_dnaK_gene_cluster_extended isu;Ribosome_biogenesis_bacterial
scaffold1|size1664507	fig|6666666.156949.peg.110	peg	scaffold1|size1664507_36013_36783	36013	36783	+	Ribosomal RNA small subunit methyltransferase E (EC 2.1.1.-)	FIG00000248	icw(3);Heat_shock_dnaK_gene_cluster_extended isu;Cluster_containing_Glutathione_synthetase isu;RNA_methylation
scaffold1|size1664507	fig|6666666.156949.peg.111	peg	scaffold1|size1664507_36783_38138	36783	38138	+	tRNA-t(6)A37 methylthiotransferase	FIG00002029	icw(1);Heat_shock_dnaK_gene_cluster_extended isu;Methylthiotransferases
scaffold1|size1664507	fig|6666666.156949.peg.112	peg	scaffold1|size1664507_39097_38174	39097	38174	-	Sodium-dependent phosphate transporter	FIG00058322	isu;Phosphate_metabolism isu;NhaA,_NhaD_and_Sodium-dependent_phosphate_transporters
scaffold1|size1664507	fig|6666666.156949.peg.113	peg	scaffold1|size1664507_39270_39443	39270	39443	+	SSU ribosomal protein S21p	FIG00000178	icw(1);Macromolecular_synthesis_operon
scaffold1|size1664507	fig|6666666.156949.peg.114	peg	scaffold1|size1664507_39458_39904	39458	39904	+	Transamidase GatB domain protein	FIG00012764	isu;Macromolecular_synthesis_operon
scaffold1|size1664507	fig|6666666.156949.peg.115	peg	scaffold1|size1664507_40035_41348	40035	41348	+	FIG01226563: hypothetical protein	FIG01226562	NA
scaffold1|size1664507	fig|6666666.156949.peg.116	peg	scaffold1|size1664507_41370_42365	41370	42365	+	hypothetical protein	FIG01963437	NA
scaffold1|size1664507	fig|6666666.156949.peg.117	peg	scaffold1|size1664507_42390_42809	42390	42809	+	FIG01232279: hypothetical protein	FIG01232276	NA
scaffold1|size1664507	fig|6666666.156949.peg.118	peg	scaffold1|size1664507_42866_43147	42866	43147	+	FIG01225215: hypothetical protein	FIG01225213	NA
scaffold1|size1664507	fig|6666666.156949.peg.119	peg	scaffold1|size1664507_43166_44362	43166	44362	+	Stage IV sporulation protein	FIG00513824	NA
scaffold1|size1664507	fig|6666666.156949.peg.120	peg	scaffold1|size1664507_44359_45318	44359	45318	+	Phosphate starvation-inducible protein PhoH, predicted ATPase	FIG00045341	icw(2);Glycyl-tRNA_synthetase_containing_cluster icw(1);CBSS-56780.10.peg.1536 isu;Phosphate_metabolism
scaffold1|size1664507	fig|6666666.156949.peg.121	peg	scaffold1|size1664507_45397_47532	45397	47532	+	Membrane protein containing HD superfamily hydrolase domain, YQFF ortholog	FIG00002508	isu;CBSS-56780.10.peg.1536
scaffold1|size1664507	fig|6666666.156949.peg.122	peg	scaffold1|size1664507_47533_48006	47533	48006	+	Metal-dependent hydrolase YbeY, involved in rRNA and/or ribosome maturation and assembly	NA	icw(2);Glycyl-tRNA_synthetase_containing_cluster icw(2);CBSS-56780.10.peg.1536
scaffold1|size1664507	fig|6666666.156949.peg.123	peg	scaffold1|size1664507_47987_48358	47987	48358	+	Diacylglycerol kinase (EC 2.7.1.107)	FIG00229216	isu;Riboflavin_synthesis_cluster isu;Glycerolipid_and_Glycerophospholipid_Metabolism_in_Bacteria
scaffold1|size1664507	fig|6666666.156949.peg.124	peg	scaffold1|size1664507_48319_48435	48319	48435	+	Nitrogen regulatory protein P-II	FIG00005111	idu(1);Ammonia_assimilation
scaffold1|size1664507	fig|6666666.156949.peg.125	peg	scaffold1|size1664507_48477_48887	48477	48887	+	Cytidine deaminase (EC 3.5.4.5)	FIG00000720	isu;Murein_hydrolase_regulation_and_cell_death isu;tRNA_modification_Bacteria isu;pyrimidine_conversions
scaffold1|size1664507	fig|6666666.156949.peg.126	peg	scaffold1|size1664507_48868_49773	48868	49773	+	GTP-binding protein Era	FIG01304818	isu;Bacterial_Cell_Division isu;CBSS-176299.4.peg.1292 isu;Universal_GTPases icw(1);Glycyl-tRNA_synthetase_containing_cluster
scaffold1|size1664507	fig|6666666.156949.peg.127	peg	scaffold1|size1664507_49921_50064	49921	50064	+	hypothetical protein	NA	NA
scaffold1|size1664507	fig|6666666.156949.peg.128	peg	scaffold1|size1664507_50101_50868	50101	50868	+	DNA recombination and repair protein RecO	FIG00000315	icw(1);CBSS-176299.4.peg.1292 icw(4);Glycyl-tRNA_synthetase_containing_cluster isu;DNA_repair,_bacterial_RecFOR_pathway
scaffold1|size1664507	fig|6666666.156949.peg.129	peg	scaffold1|size1664507_51081_52052	51081	52052	+	Glycyl-tRNA synthetase alpha chain (EC 6.1.1.14)	FIG00000458	isu;tRNA_aminoacylation,_Gly isu;Glycyl-tRNA_synthetase isu;Glycyl-tRNA_synthetase_containing_cluster
scaffold1|size1664507	fig|6666666.156949.peg.130	peg	scaffold1|size1664507_52045_54084	52045	54084	+	Glycyl-tRNA synthetase beta chain (EC 6.1.1.14)	FIG00000448	icw(1);tRNA_aminoacylation,_Gly icw(1);Glycyl-tRNA_synthetase icw(2);Glycyl-tRNA_synthetase_containing_cluster
scaffold1|size1664507	fig|6666666.156949.peg.131	peg	scaffold1|size1664507_54218_54859	54218	54859	+	CBS domain protein, lmo1865 homolog	FIG00001987	NA
scaffold1|size1664507	fig|6666666.156949.peg.132	peg	scaffold1|size1664507_54885_55697	54885	55697	+	ATP/GTP-binding protein, SA1392 homolog	FIG00073539	NA
scaffold1|size1664507	fig|6666666.156949.peg.133	peg	scaffold1|size1664507_55951_56445	55951	56445	+	FIG01228064: hypothetical protein	FIG01228063	NA
scaffold1|size1664507	fig|6666666.156949.peg.134	peg	scaffold1|size1664507_56479_58290	56479	58290	+	DNA primase (EC 2.7.7.-)	FIG00019251	icw(1);CBSS-349161.4.peg.2417 icw(1);Macromolecular_synthesis_operon idu(1);DNA-replication
scaffold1|size1664507	fig|6666666.156949.peg.135	peg	scaffold1|size1664507_58489_59604	58489	59604	+	RNA polymerase sigma factor RpoD	FIG00038814	idu(1);CBSS-349161.4.peg.2417 idu(1);Macromolecular_synthesis_operon idu(1);Flagellum idu(1);Transcription_initiation,_bacterial_sigma_factors
scaffold1|size1664507	fig|6666666.156949.peg.136	peg	scaffold1|size1664507_59736_59557	59736	59557	-	FIG01232999: hypothetical protein	FIG01232998	NA
scaffold1|size1664507	fig|6666666.156949.peg.137	peg	scaffold1|size1664507_59933_60295	59933	60295	+	Membrane-attached cytochrome c550	FIG00007793	idu(1);Soluble_cytochromes_and_functionally_related_electron_carriers
scaffold1|size1664507	fig|6666666.156949.peg.138	peg	scaffold1|size1664507_60552_61202	60552	61202	+	Putative tRNA-m1A22 methylase	FIG00008776	icw(2);CBSS-349161.4.peg.2417 isu;tRNA_modification_Bacteria
scaffold1|size1664507	fig|6666666.156949.peg.139	peg	scaffold1|size1664507_61195_62316	61195	62316	+	FIG146262: hypothetical protein	FIG00292025	NA
scaffold1|size1664507	fig|6666666.156949.peg.140	peg	scaffold1|size1664507_63283_62339	63283	62339	-	4-hydroxy-3-methylbut-2-enyl diphosphate reductase (EC 1.17.1.2)	FIG00000381	isu;Isoprenoid_Biosynthesis isu;Nonmevalonate_Branch_of_Isoprenoid_Biosynthesis
scaffold1|size1664507	fig|6666666.156949.peg.141	peg	scaffold1|size1664507_64146_63406	64146	63406	-	VrrA protein	FIG01326796	NA
scaffold1|size1664507	fig|6666666.156949.peg.142	peg	scaffold1|size1664507_64288_65631	64288	65631	+	DEAD-box ATP-dependent RNA helicase CshB (EC 3.6.4.13)	FIG00007296	NA
scaffold1|size1664507	fig|6666666.156949.peg.143	peg	scaffold1|size1664507_65641_66534	65641	66534	+	Endonuclease IV (EC 3.1.21.2)	FIG00000899	isu;DNA_repair,_bacterial
scaffold1|size1664507	fig|6666666.156949.peg.144	peg	scaffold1|size1664507_66815_66561	66815	66561	-	FIG01226688: hypothetical protein	FIG01226684	NA
scaffold1|size1664507	fig|6666666.156949.peg.145	peg	scaffold1|size1664507_66931_67812	66931	67812	+	Uncharacterized membrane protein Bsu2508 (YqfU)	FIG01312674	NA
scaffold1|size1664507	fig|6666666.156949.peg.146	peg	scaffold1|size1664507_67950_68387	67950	68387	+	Zinc uptake regulation protein ZUR	FIG00000479	icw(1);Oxidative_stress isu;Zinc_regulated_enzymes isu;Glycyl-tRNA_synthetase_containing_cluster
scaffold1|size1664507	fig|6666666.156949.peg.147	peg	scaffold1|size1664507_69011_68430	69011	68430	-	HAD-superfamily hydrolase-like protein	FIG01354845	NA
scaffold1|size1664507	fig|6666666.156949.peg.148	peg	scaffold1|size1664507_69150_69533	69150	69533	+	FIG01226626: hypothetical protein	FIG01226625	NA
scaffold1|size1664507	fig|6666666.156949.peg.149	peg	scaffold1|size1664507_70686_69559	70686	69559	-	1-hydroxy-2-methyl-2-(E)-butenyl 4-diphosphate synthase (EC 1.17.7.1)	FIG00000449	isu;CBSS-83331.1.peg.3039 isu;Isoprenoid_Biosynthesis isu;Nonmevalonate_Branch_of_Isoprenoid_Biosynthesis
scaffold1|size1664507	fig|6666666.156949.peg.150	peg	scaffold1|size1664507_71114_70815	71114	70815	-	FIG01226427: hypothetical protein	FIG01226426	NA
scaffold1|size1664507	fig|6666666.156949.peg.151	peg	scaffold1|size1664507_71970_71209	71970	71209	-	Arginine/ornithine antiporter ArcD	FIG00001166	idu(4);Arginine_and_Ornithine_Degradation idu(4);Arginine_Deiminase_Pathway idu(4);Polyamine_Metabolism
scaffold1|size1664507	fig|6666666.156949.peg.152	peg	scaffold1|size1664507_72080_72562	72080	72562	+	probable membrane protein NMA1128	FIG01314885	NA
scaffold1|size1664507	fig|6666666.156949.peg.153	peg	scaffold1|size1664507_72741_73349	72741	73349	+	Manganese superoxide dismutase (EC 1.15.1.1)	FIG00000848	isu;Oxidative_stress isu;Nitric_oxide_synthase isu;Protection_from_Reactive_Oxygen_Species
scaffold1|size1664507	fig|6666666.156949.peg.154	peg	scaffold1|size1664507_73456_74748	73456	74748	+	membrane protein, putative	FIG00439698	NA
scaffold1|size1664507	fig|6666666.156949.peg.155	peg	scaffold1|size1664507_74862_77012	74862	77012	+	Cell division protein FtsI [Peptidoglycan synthetase] (EC 2.4.1.129) / Transpeptidase, Penicillin binding protein transpeptidase domain	FIG00012378	idu(3);Bacterial_Cell_Division idu(3);CBSS-83331.1.peg.3039 idu(3);Flagellum_in_Campylobacter idu(3);Bacterial_Cytoskeleton idu(3);Peptidoglycan_Biosynthesis idu(3);16S_rRNA_modification_within_P_site_of_ribosome
scaffold1|size1664507	fig|6666666.156949.peg.156	peg	scaffold1|size1664507_77167_78069	77167	78069	+	Phosphate ABC transporter, periplasmic phosphate-binding protein PstS (TC 3.A.1.7.1)	FIG00010508	isu;PhoR-PhoB_two-component_regulatory_system icw(4);High_affinity_phosphate_transporter_and_control_of_PHO_regulon icw(4);Phosphate_metabolism
scaffold1|size1664507	fig|6666666.156949.peg.157	peg	scaffold1|size1664507_78138_79067	78138	79067	+	Phosphate transport system permease protein PstC (TC 3.A.1.7.1)	FIG00018561	isu;High_affinity_phosphate_transporter_and_control_of_PHO_regulon isu;Phosphate_metabolism
scaffold1|size1664507	fig|6666666.156949.peg.158	peg	scaffold1|size1664507_79067_79951	79067	79951	+	Phosphate transport system permease protein PstA (TC 3.A.1.7.1)	FIG00083946	icw(3);High_affinity_phosphate_transporter_and_control_of_PHO_regulon icw(1);Phosphate_metabolism
scaffold1|size1664507	fig|6666666.156949.peg.159	peg	scaffold1|size1664507_79972_80781	79972	80781	+	Phosphate transport ATP-binding protein PstB (TC 3.A.1.7.1)	FIG00011114	icw(2);High_affinity_phosphate_transporter_and_control_of_PHO_regulon icw(3);Phosphate_metabolism
scaffold1|size1664507	fig|6666666.156949.peg.160	peg	scaffold1|size1664507_80792_81574	80792	81574	+	Phosphate transport ATP-binding protein PstB (TC 3.A.1.7.1)	FIG00011114	icw(2);High_affinity_phosphate_transporter_and_control_of_PHO_regulon icw(3);Phosphate_metabolism
scaffold1|size1664507	fig|6666666.156949.peg.161	peg	scaffold1|size1664507_82066_81602	82066	81602	-	YQZC protein	FIG01230570	NA
scaffold1|size1664507	fig|6666666.156949.peg.162	peg	scaffold1|size1664507_82416_82063	82416	82063	-	hypothetical protein	NA	NA
scaffold1|size1664507	fig|6666666.156949.peg.163	peg	scaffold1|size1664507_82611_82477	82611	82477	-	hypothetical protein	NA	NA
scaffold1|size1664507	fig|6666666.156949.peg.164	peg	scaffold1|size1664507_82719_83066	82719	83066	+	unknown	NA	NA
scaffold1|size1664507	fig|6666666.156949.peg.165	peg	scaffold1|size1664507_83063_84142	83063	84142	+	Uncharacterized glycosyltransferase yqgM (EC 2.-.-.-)	FIG01229485	NA
scaffold1|size1664507	fig|6666666.156949.peg.166	peg	scaffold1|size1664507_84469_84350	84469	84350	-	hypothetical protein	NA	NA
scaffold1|size1664507	fig|6666666.156949.peg.167	peg	scaffold1|size1664507_84460_85023	84460	85023	+	5-formyltetrahydrofolate cyclo-ligase (EC 6.3.3.2)	FIG00000252	isu;5-FCL-like_protein isu;One-carbon_metabolism_by_tetrahydropterines isu;Serine-glyoxylate_cycle isu;Folate_Biosynthesis
scaffold1|size1664507	fig|6666666.156949.peg.168	peg	scaffold1|size1664507_85090_85263	85090	85263	+	unknown	NA	NA
scaffold1|size1664507	fig|6666666.156949.peg.169	peg	scaffold1|size1664507_85353_86876	85353	86876	+	FIG056164: rhomboid family serine protease	FIG00447744	isu;Peptidyl-prolyl_cis-trans_isomerase_containing_cluster
scaffold1|size1664507	fig|6666666.156949.peg.170	peg	scaffold1|size1664507_86974_87201	86974	87201	+	FIG01225596: hypothetical protein	FIG01225594	NA
scaffold1|size1664507	fig|6666666.156949.peg.171	peg	scaffold1|size1664507_87212_88177	87212	88177	+	Glucokinase (EC 2.7.1.2)	FIG00001065	isu;Entner-Doudoroff_Pathway isu;Glycolysis_and_Gluconeogenesis
scaffold1|size1664507	fig|6666666.156949.peg.172	peg	scaffold1|size1664507_88293_90209	88293	90209	+	Lipoteichoic acid synthase LtaS Type IIIa	FIG00014878	idu(1);Polyglycerolphosphate_lipoteichoic_acid_biosynthesis
scaffold1|size1664507	fig|6666666.156949.peg.173	peg	scaffold1|size1664507_90295_91422	90295	91422	+	Gamma-D-glutamyl-L-diamino acid endopeptidase I (EC 3.4.19.11)	FIG01328024	NA
scaffold1|size1664507	fig|6666666.156949.peg.174	peg	scaffold1|size1664507_91484_92545	91484	92545	+	unknown	NA	NA
scaffold1|size1664507	fig|6666666.156949.peg.175	peg	scaffold1|size1664507_92548_92862	92548	92862	+	ExtraCellular Mutant; Ecm15p	NA	NA
scaffold1|size1664507	fig|6666666.156949.peg.176	peg	scaffold1|size1664507_93067_92894	93067	92894	-	YqgW	FIG01232623	NA
scaffold1|size1664507	fig|6666666.156949.peg.177	peg	scaffold1|size1664507_93269_93129	93269	93129	-	hypothetical protein	NA	NA
scaffold1|size1664507	fig|6666666.156949.peg.178	peg	scaffold1|size1664507_93239_93859	93239	93859	+	Similar to Hydroxyacylglutathione hydrolase, but in an organism lacking glutathione biosynthesis	FIG00146516	isu;Glutathione:_Non-redox_reactions
scaffold1|size1664507	fig|6666666.156949.peg.179	peg	scaffold1|size1664507_94144_93899	94144	93899	-	FIG00673235: hypothetical protein	FIG00673233	NA
scaffold1|size1664507	fig|6666666.156949.peg.180	peg	scaffold1|size1664507_94376_94756	94376	94756	+	YqgZ	FIG01225577	NA
scaffold1|size1664507	fig|6666666.156949.rna.7	rna	scaffold1|size1664507_94893_94823	94893	94823	-	tRNA-Gln-TTG	NA	NA
scaffold1|size1664507	fig|6666666.156949.peg.181	peg	scaffold1|size1664507_94980_95816	94980	95816	+	RsbR, positive regulator of sigma-B	FIG00001285	idu(5);SigmaB_stress_responce_regulation
scaffold1|size1664507	fig|6666666.156949.peg.182	peg	scaffold1|size1664507_97197_95872,scaffold1|size1664507_95868_95797	97197	95797	-	Magnesium and cobalt efflux protein CorC	FIG00042627	idu(4);Magnesium_transport idu(4);Glycyl-tRNA_synthetase_containing_cluster idu(4);CBSS-56780.10.peg.1536
scaffold1|size1664507	fig|6666666.156949.peg.183	peg	scaffold1|size1664507_97340_98293	97340	98293	+	Magnesium and cobalt transport protein CorA	NA	idu(1);Magnesium_transport idu(1);Campylobacter_Iron_Metabolism
scaffold1|size1664507	fig|6666666.156949.peg.184	peg	scaffold1|size1664507_98295_98492	98295	98492	+	hypothetical protein	NA	NA
scaffold1|size1664507	fig|6666666.156949.peg.185	peg	scaffold1|size1664507_98498_98620	98498	98620	+	hypothetical protein	NA	NA
scaffold1|size1664507	fig|6666666.156949.peg.186	peg	scaffold1|size1664507_98703_99773	98703	99773	+	Late competence protein ComGA, access of DNA to ComEA	FIG00001774	isu;Gram_Positive_Competence
scaffold1|size1664507	fig|6666666.156949.peg.187	peg	scaffold1|size1664507_99760_100797	99760	100797	+	Late competence protein ComGB, access of DNA to ComEA	FIG00001758	icw(1);Gram_Positive_Competence
scaffold1|size1664507	fig|6666666.156949.peg.188	peg	scaffold1|size1664507_100811_101107	100811	101107	+	Late competence protein ComGC, access of DNA to ComEA, FIG007487	FIG00006416	NA
scaffold1|size1664507	fig|6666666.156949.peg.189	peg	scaffold1|size1664507_101097_101528	101097	101528	+	Late competence protein ComGD, access of DNA to ComEA, FIG012777	FIG00008903	NA
scaffold1|size1664507	fig|6666666.156949.peg.190	peg	scaffold1|size1664507_101512_101859	101512	101859	+	Late competence protein ComGE, FIG015513	FIG00015513	NA
scaffold1|size1664507	fig|6666666.156949.peg.191	peg	scaffold1|size1664507_101972_102268	101972	102268	+	Late competence protein ComGF, access of DNA to ComEA, FIG012620	FIG00011864	NA
scaffold1|size1664507	fig|6666666.156949.peg.192	peg	scaffold1|size1664507_102269_102643	102269	102643	+	Late competence protein ComGG, FIG028917	FIG00028917	NA
scaffold1|size1664507	fig|6666666.156949.peg.193	peg	scaffold1|size1664507_102715_102894	102715	102894	+	FIG01228056: hypothetical protein	FIG01228055	NA
scaffold1|size1664507	fig|6666666.156949.peg.194	peg	scaffold1|size1664507_103262_102936	103262	102936	-	YqzG	FIG01334370	NA
scaffold1|size1664507	fig|6666666.156949.peg.195	peg	scaffold1|size1664507_103533_104294	103533	104294	+	YqxM protein, required for localization of TasA to extracellular matrix	FIG01298677	icw(2);Bacillus_biofilm_matrix_protein_component_TasA_and_homologs
scaffold1|size1664507	fig|6666666.156949.peg.196	peg	scaffold1|size1664507_104278_104850	104278	104850	+	Signal peptidase SipW (EC 3.4.21.89), required for TasA secretion	FIG01303740	icw(3);Bacillus_biofilm_matrix_protein_component_TasA_and_homologs isu;CBSS-176299.4.peg.1292
scaffold1|size1664507	fig|6666666.156949.peg.197	peg	scaffold1|size1664507_104915_105700	104915	105700	+	Stationary phase secreted protein TasA, major protein component of biofilm matrix	FIG00143134	isu;Bacillus_biofilm_matrix_protein_component_TasA_and_homologs
scaffold1|size1664507	fig|6666666.156949.peg.198	peg	scaffold1|size1664507_106133_105792	106133	105792	-	SinR, regulator of post-exponential-phase responses genes (competence and sporulation)	FIG00007928	icw(1);Bacillus_biofilm_matrix_protein_component_TasA_and_homologs
scaffold1|size1664507	fig|6666666.156949.peg.199	peg	scaffold1|size1664507_106334_106161	106334	106161	-	SinI protein, antagonist of SinR	FIG00027232	icw(4);Bacillus_biofilm_matrix_protein_component_TasA_and_homologs
scaffold1|size1664507	fig|6666666.156949.peg.200	peg	scaffold1|size1664507_107312_106518	107312	106518	-	Conserved protein YqhG	FIG00006702	isu;CBSS-288681.3.peg.1039
scaffold1|size1664507	fig|6666666.156949.peg.201	peg	scaffold1|size1664507_109006_107333	109006	107333	-	Superfamily II DNA/RNA helicases, SNF2 family	FIG01255181	icw(1);CBSS-288681.3.peg.1039 isu;CBSS-316273.3.peg.2709
scaffold1|size1664507	fig|6666666.156949.peg.202	peg	scaffold1|size1664507_109448_110536	109448	110536	+	Aminomethyltransferase (glycine cleavage system T protein) (EC 2.1.2.10)	FIG00138538	icw(1);Glycine_and_Serine_Utilization isu;CBSS-87626.3.peg.3639 icw(2);Glycine_cleavage_system
scaffold1|size1664507	fig|6666666.156949.peg.203	peg	scaffold1|size1664507_110566_111912	110566	111912	+	Glycine dehydrogenase [decarboxylating] (glycine cleavage system P1 protein) (EC 1.4.4.2)	FIG00001364	isu;Glycine_and_Serine_Utilization icw(1);Glycine_cleavage_system
scaffold1|size1664507	fig|6666666.156949.peg.204	peg	scaffold1|size1664507_111905_113371	111905	113371	+	Glycine dehydrogenase [decarboxylating] (glycine cleavage system P2 protein) (EC 1.4.4.2)	FIG00001328	icw(2);Glycine_and_Serine_Utilization isu;Glycine_cleavage_system
scaffold1|size1664507	fig|6666666.156949.peg.205	peg	scaffold1|size1664507_113786_113406	113786	113406	-	Rhodanese-like domain protein	FIG00003495	NA
scaffold1|size1664507	fig|6666666.156949.peg.206	peg	scaffold1|size1664507_113977_114813	113977	114813	+	Lipoate-protein ligase A	FIG00000465	idu(1);Lipoic_acid_metabolism
scaffold1|size1664507	fig|6666666.156949.peg.207	peg	scaffold1|size1664507_114913_115341	114913	115341	+	Mn-dependent transcriptional regulator MntR	FIG00634996	NA
scaffold1|size1664507	fig|6666666.156949.peg.208	peg	scaffold1|size1664507_115467_116342	115467	116342	+	lysophospholipase-like family protein	FIG01319990	NA
scaffold1|size1664507	fig|6666666.156949.peg.209	peg	scaffold1|size1664507_116734_116339	116734	116339	-	BH2804 unknown conserved protein in B. subtilis	NA	NA
scaffold1|size1664507	fig|6666666.156949.peg.210	peg	scaffold1|size1664507_117730_116774	117730	116774	-	FIG00672904: membrane protein YqhQ	FIG00672902	NA
scaffold1|size1664507	fig|6666666.156949.peg.211	peg	scaffold1|size1664507_117957_118493	117957	118493	+	FIG01225396: hypothetical protein	FIG01225395	NA
scaffold1|size1664507	fig|6666666.156949.peg.212	peg	scaffold1|size1664507_118580_119026	118580	119026	+	3-dehydroquinate dehydratase II (EC 4.2.1.10)	FIG00000430	isu;Chorismate_Synthesis isu;Common_Pathway_For_Synthesis_of_Aromatic_Compounds_(DAHP_synthase_to_chorismate) isu;Quinate_degradation
scaffold1|size1664507	fig|6666666.156949.peg.213	peg	scaffold1|size1664507_119023_120084	119023	120084	+	Aminopeptidase YpdF (MP-, MA-, MS-, AP-, NP- specific)	FIG00135469	isu;Protein_degradation
scaffold1|size1664507	fig|6666666.156949.peg.214	peg	scaffold1|size1664507_120109_120666	120109	120666	+	Translation elongation factor P	FIG00000177	isu;Translation_elongation_factor_P_lysylation isu;Translation_elongation_factors_bacterial
scaffold1|size1664507	fig|6666666.156949.peg.215	peg	scaffold1|size1664507_120879_121091	120879	121091	+	FIG01228228: hypothetical protein	FIG01228226	NA
scaffold1|size1664507	fig|6666666.156949.peg.216	peg	scaffold1|size1664507_121167_122090	121167	122090	+	Stage III sporulation protein AA	FIG00003672	icw(7);Sporulation_Cluster_III_A icw(2);Sporulation_gene_orphans
scaffold1|size1664507	fig|6666666.156949.peg.217	peg	scaffold1|size1664507_122084_122599	122084	122599	+	Stage III sporulation protein AB	FIG00013554	icw(4);Sporulation_Cluster_III_A icw(1);Sporulation_gene_orphans
scaffold1|size1664507	fig|6666666.156949.peg.218	peg	scaffold1|size1664507_122622_122828	122622	122828	+	Stage III sporulation protein AC	FIG00084255	icw(2);Sporulation_Cluster_III_A icw(4);Sporulation_gene_orphans
scaffold1|size1664507	fig|6666666.156949.peg.219	peg	scaffold1|size1664507_122835_123236	122835	123236	+	Stage III sporulation protein AD	FIG00011987	isu;Sporulation_Cluster_III_A icw(3);Sporulation_gene_orphans
scaffold1|size1664507	fig|6666666.156949.peg.220	peg	scaffold1|size1664507_123255_124454	123255	124454	+	Stage III sporulation protein AE	FIG00003769	icw(5);Sporulation_Cluster_III_A icw(6);Sporulation_gene_orphans isu;SpoVS_protein_family isu;Sporulation-associated_proteins_with_broader_functions
scaffold1|size1664507	fig|6666666.156949.peg.221	peg	scaffold1|size1664507_124468_125088	124468	125088	+	Stage III sporulation protein AF	FIG00006794	icw(1);Sporulation_Cluster_III_A isu;Sporulation_gene_orphans
scaffold1|size1664507	fig|6666666.156949.peg.222	peg	scaffold1|size1664507_125081_125770	125081	125770	+	Stage III sporulation protein AG	FIG00004841	icw(3);Sporulation_Cluster_III_A icw(5);Sporulation_gene_orphans
scaffold1|size1664507	fig|6666666.156949.peg.223	peg	scaffold1|size1664507_125771_126427	125771	126427	+	Stage III sporulation protein AH	FIG00013525	icw(6);Sporulation_Cluster_III_A icw(7);Sporulation_gene_orphans
scaffold1|size1664507	fig|6666666.156949.peg.224	peg	scaffold1|size1664507_126583_127062	126583	127062	+	Biotin carboxyl carrier protein of acetyl-CoA carboxylase	FIG00000411	isu;Fatty_Acid_Biosynthesis_FASII
scaffold1|size1664507	fig|6666666.156949.peg.225	peg	scaffold1|size1664507_127074_128426	127074	128426	+	Biotin carboxylase of acetyl-CoA carboxylase (EC 6.3.4.14)	FIG00000420	icw(1);Fatty_Acid_Biosynthesis_FASII
scaffold1|size1664507	fig|6666666.156949.peg.226	peg	scaffold1|size1664507_128447_128854	128447	128854	+	Alkaline shock protein	FIG00668641	NA
scaffold1|size1664507	fig|6666666.156949.peg.227	peg	scaffold1|size1664507_129118_129513	129118	129513	+	Transcription termination protein NusB	FIG00016836	isu;Riboflavin_synthesis_cluster isu;Transcription_factors_bacterial
scaffold1|size1664507	fig|6666666.156949.peg.228	peg	scaffold1|size1664507_129525_130376	129525	130376	+	Methylenetetrahydrofolate dehydrogenase (NADP+) (EC 1.5.1.5) / Methenyltetrahydrofolate cyclohydrolase (EC 3.5.4.9)	FIG00000105	isu;5-FCL-like_protein isu;One-carbon_metabolism_by_tetrahydropterines isu;One-carbon_metabolism_by_tetrahydropterines isu;Serine-glyoxylate_cycle isu;Serine-glyoxylate_cycle
scaffold1|size1664507	fig|6666666.156949.peg.229	peg	scaffold1|size1664507_130478_131860	130478	131860	+	Exodeoxyribonuclease VII large subunit (EC 3.1.11.6)	FIG00000323	icw(1);DNA_repair,_bacterial isu;Purine_salvage_cluster
scaffold1|size1664507	fig|6666666.156949.peg.230	peg	scaffold1|size1664507_131857_132111	131857	132111	+	Exodeoxyribonuclease VII small subunit (EC 3.1.11.6)	FIG00000435	isu;DNA_repair,_bacterial icw(1);Purine_salvage_cluster
scaffold1|size1664507	fig|6666666.156949.peg.231	peg	scaffold1|size1664507_132101_132991	132101	132991	+	(2E,6E)-farnesyl diphosphate synthase (EC 2.5.1.10)	FIG01303741	isu;Polyprenyl_Diphosphate_Biosynthesis isu;Isoprenoinds_for_Quinones icw(1);Isoprenoid_Biosynthesis isu;Isoprenoid_Biosynthesis:_Interconversions
scaffold1|size1664507	fig|6666666.156949.peg.232	peg	scaffold1|size1664507_133143_132988	133143	132988	-	hypothetical protein	NA	NA
scaffold1|size1664507	fig|6666666.156949.peg.233	peg	scaffold1|size1664507_133166_135067	133166	135067	+	1-deoxy-D-xylulose 5-phosphate synthase (EC 2.2.1.7)	FIG00000343	isu;Pyridoxin_(Vitamin_B6)_Biosynthesis isu;Isoprenoid_Biosynthesis isu;Thiamin_biosynthesis isu;Nonmevalonate_Branch_of_Isoprenoid_Biosynthesis
scaffold1|size1664507	fig|6666666.156949.peg.234	peg	scaffold1|size1664507_135064_135909	135064	135909	+	RNA binding methyltransferase FtsJ like	FIG00001125	isu;tRNA_modification_Bacteria
scaffold1|size1664507	fig|6666666.156949.peg.235	peg	scaffold1|size1664507_136007_136456	136007	136456	+	Arginine pathway regulatory protein ArgR, repressor of arg regulon	FIG00003270	isu;Arginine_Biosynthesis_--_gjo isu;Arginine_Biosynthesis_extended isu;Arginine_and_Ornithine_Degradation isu;Arginine_Deiminase_Pathway
scaffold1|size1664507	fig|6666666.156949.peg.236	peg	scaffold1|size1664507_136489_138219	136489	138219	+	DNA repair protein RecN	FIG00000317	isu;DNA_repair,_bacterial isu;DNA-replication
scaffold1|size1664507	fig|6666666.156949.peg.237	peg	scaffold1|size1664507_138394_139674	138394	139674	+	Stage IV sporulation protein B	FIG00004463	isu;Sporulation_gene_orphans
scaffold1|size1664507	fig|6666666.156949.peg.238	peg	scaffold1|size1664507_139652_139825	139652	139825	+	FIG01237270: hypothetical protein	FIG01237268	NA
scaffold1|size1664507	fig|6666666.156949.peg.239	peg	scaffold1|size1664507_139950_140753	139950	140753	+	Stage 0 sporulation two-component response regulator (Spo0A)	FIG00003682	icw(1);Sporulation_gene_orphans
scaffold1|size1664507	fig|6666666.156949.peg.240	peg	scaffold1|size1664507_141062_141175	141062	141175	+	hypothetical protein	NA	NA
scaffold1|size1664507	fig|6666666.156949.peg.241	peg	scaffold1|size1664507_142366_141218	142366	141218	-	Putative NADH-dependent flavin oxidoreductase	FIG01320969	NA
scaffold1|size1664507	fig|6666666.156949.peg.242	peg	scaffold1|size1664507_142561_142409	142561	142409	-	hypothetical protein	NA	NA
scaffold1|size1664507	fig|6666666.156949.peg.243	peg	scaffold1|size1664507_142869_143165	142869	143165	+	FIG01235415: hypothetical protein	FIG01235413	NA
scaffold1|size1664507	fig|6666666.156949.peg.244	peg	scaffold1|size1664507_143206_143805	143206	143805	+	N-acetylmuramoyl-L-alanine amidase AmiC precursor (EC 3.5.1.28)	FIG01232163	NA
scaffold1|size1664507	fig|6666666.156949.peg.245	peg	scaffold1|size1664507_143884_144615	143884	144615	+	Glycerophosphoryl diester phosphodiesterase (EC 3.1.4.46)	FIG00002239	idu(1);Glycerol_and_Glycerol-3-phosphate_Uptake_and_Utilization
scaffold1|size1664507	fig|6666666.156949.peg.246	peg	scaffold1|size1664507_144742_145923	144742	145923	+	3-ketoacyl-CoA thiolase [isoleucine degradation] (EC 2.3.1.16)	FIG01304912	isu;Isoleucine_degradation
scaffold1|size1664507	fig|6666666.156949.peg.247	peg	scaffold1|size1664507_145948_146811	145948	146811	+	3-hydroxybutyryl-CoA dehydrogenase (EC 1.1.1.157)	FIG00068115	isu;Polyhydroxybutyrate_metabolism isu;Lysine_fermentation isu;Butanol_Biosynthesis isu;Acetyl-CoA_fermentation_to_Butyrate
scaffold1|size1664507	fig|6666666.156949.peg.248	peg	scaffold1|size1664507_146839_147978	146839	147978	+	Butyryl-CoA dehydrogenase (EC 1.3.99.2)	FIG00009149	NA
scaffold1|size1664507	fig|6666666.156949.peg.249	peg	scaffold1|size1664507_148012_149130	148012	149130	+	2-methylcitrate synthase (EC 2.3.3.5)	FIG00001030	icw(1);Methylcitrate_cycle
scaffold1|size1664507	fig|6666666.156949.peg.250	peg	scaffold1|size1664507_149145_150563	149145	150563	+	2-methylcitrate dehydratase (EC 4.2.1.79)	FIG00001287	isu;Methylcitrate_cycle
scaffold1|size1664507	fig|6666666.156949.peg.251	peg	scaffold1|size1664507_150581_151486	150581	151486	+	Isocitrate lyase (EC 4.1.3.1)	FIG00000818	isu;Glyoxylate_bypass isu;Serine-glyoxylate_cycle
scaffold1|size1664507	fig|6666666.156949.peg.252	peg	scaffold1|size1664507_151764_151531	151764	151531	-	FIG01225754: hypothetical protein	FIG01225753	NA
scaffold1|size1664507	fig|6666666.156949.peg.253	peg	scaffold1|size1664507_151917_153995	151917	153995	+	Transcriptional regulator BkdR of isoleucine and valine catabolism operon	FIG00009770	isu;Isoleucine_degradation isu;Valine_degradation
scaffold1|size1664507	fig|6666666.156949.peg.254	peg	scaffold1|size1664507_154120_155019	154120	155019	+	phosphotransbutyrylase (EC 2.3.1.19)	FIG00070513	NA
scaffold1|size1664507	fig|6666666.156949.peg.255	peg	scaffold1|size1664507_155031_156125	155031	156125	+	Leucine dehydrogenase (EC 1.4.1.9)	FIG00020626	isu;Branched-Chain_Amino_Acid_Biosynthesis icw(1);Leucine_Degradation_and_HMG-CoA_Metabolism
scaffold1|size1664507	fig|6666666.156949.peg.256	peg	scaffold1|size1664507_156144_157235	156144	157235	+	Butyrate kinase (EC 2.7.2.7)	FIG00007694	icw(1);Isoleucine_degradation isu;Acetyl-CoA_fermentation_to_Butyrate icw(1);Valine_degradation
scaffold1|size1664507	fig|6666666.156949.peg.257	peg	scaffold1|size1664507_157256_158680	157256	158680	+	Dihydrolipoamide dehydrogenase of branched-chain alpha-keto acid dehydrogenase (EC 1.8.1.4)	NA	icw(4);Isoleucine_degradation icw(3);Dehydrogenase_complexes icw(4);Leucine_Degradation_and_HMG-CoA_Metabolism icw(4);Valine_degradation
scaffold1|size1664507	fig|6666666.156949.peg.258	peg	scaffold1|size1664507_158702_159694	158702	159694	+	Branched-chain alpha-keto acid dehydrogenase, E1 component, alpha subunit (EC 1.2.4.4)	FIG00000964	icw(1);Isoleucine_degradation isu;Dehydrogenase_complexes isu;Leucine_Degradation_and_HMG-CoA_Metabolism icw(1);Valine_degradation
scaffold1|size1664507	fig|6666666.156949.peg.259	peg	scaffold1|size1664507_159708_160691	159708	160691	+	Branched-chain alpha-keto acid dehydrogenase, E1 component, beta subunit (EC 1.2.4.4)	FIG00055130	icw(3);Isoleucine_degradation icw(2);Dehydrogenase_complexes icw(3);Leucine_Degradation_and_HMG-CoA_Metabolism icw(3);Valine_degradation
scaffold1|size1664507	fig|6666666.156949.peg.260	peg	scaffold1|size1664507_160714_161988	160714	161988	+	Dihydrolipoamide acyltransferase component of branched-chain alpha-keto acid dehydrogenase complex (EC 2.3.1.168)	FIG01304883	icw(2);Isoleucine_degradation icw(1);Dehydrogenase_complexes icw(1);Leucine_Degradation_and_HMG-CoA_Metabolism icw(2);Valine_degradation
scaffold1|size1664507	fig|6666666.156949.peg.261	peg	scaffold1|size1664507_162879_162652,scaffold1|size1664507_162652_162521,scaffold1|size1664507_162519_162043	162879	162043	-	transcriptional regulator, MerR family	FIG00482799	NA
scaffold1|size1664507	fig|6666666.156949.peg.262	peg	scaffold1|size1664507_162992_162876	162992	162876	-	hypothetical protein	NA	NA
scaffold1|size1664507	fig|6666666.156949.peg.263	peg	scaffold1|size1664507_164121_162952	164121	162952	-	Multidrug resistance protein B	FIG01356213	NA
scaffold1|size1664507	fig|6666666.156949.peg.264	peg	scaffold1|size1664507_165115_164222	165115	164222	-	Transcription regulator [contains diacylglycerol kinase catalytic domain]	FIG00001646	NA
scaffold1|size1664507	fig|6666666.156949.peg.265	peg	scaffold1|size1664507_165276_165713	165276	165713	+	FIG01226417: hypothetical protein	FIG01226416	NA
scaffold1|size1664507	fig|6666666.156949.peg.266	peg	scaffold1|size1664507_165981_166748	165981	166748	+	Amino acid ABC transporter, amino acid-binding protein	FIG00774607	NA
scaffold1|size1664507	fig|6666666.156949.peg.267	peg	scaffold1|size1664507_166828_167487	166828	167487	+	ABC transporter membrane-spanning permease - glutamine transport	FIG00774298	NA
scaffold1|size1664507	fig|6666666.156949.peg.268	peg	scaffold1|size1664507_167480_168202	167480	168202	+	Glutamine transport ATP-binding protein GlnQ (TC 3.A.1.3.2)	FIG01226599	NA
scaffold1|size1664507	fig|6666666.156949.peg.269	peg	scaffold1|size1664507_168273_169241	168273	169241	+	Integral membrane protein	FIG01956050	NA
scaffold1|size1664507	fig|6666666.156949.peg.270	peg	scaffold1|size1664507_169293_169823	169293	169823	+	Protein erfK/srfK	FIG01226130	NA
scaffold1|size1664507	fig|6666666.156949.peg.271	peg	scaffold1|size1664507_170025_170447	170025	170447	+	Methylmalonyl-CoA epimerase (EC 5.1.99.1)	FIG00003953	NA
scaffold1|size1664507	fig|6666666.156949.peg.272	peg	scaffold1|size1664507_170434_171963	170434	171963	+	Acetyl-coenzyme A carboxyl transferase alpha chain (EC 6.4.1.2) / Acetyl-coenzyme A carboxyl transferase beta chain (EC 6.4.1.2); Propionyl-CoA carboxylase beta chain (EC 6.4.1.3)	FIG00002099	isu;Serine-glyoxylate_cycle isu;CBSS-83332.1.peg.3803 idu(1);Fatty_Acid_Biosynthesis_FASII idu(1);Fatty_Acid_Biosynthesis_FASII
scaffold1|size1664507	fig|6666666.156949.peg.273	peg	scaffold1|size1664507_171981_173096	171981	173096	+	Peptidase T (EC 3.4.11.4)	FIG00646264	NA
scaffold1|size1664507	fig|6666666.156949.peg.274	peg	scaffold1|size1664507_174033_173137	174033	173137	-	YqjF	FIG01241132	NA
scaffold1|size1664507	fig|6666666.156949.peg.275	peg	scaffold1|size1664507_174873_174046	174873	174046	-	Inner membrane protein translocase component YidC, OxaA protein	FIG00229604	NA
scaffold1|size1664507	fig|6666666.156949.peg.276	peg	scaffold1|size1664507_175185_174904	175185	174904	-	YqzJ	FIG01383150	NA
scaffold1|size1664507	fig|6666666.156949.peg.277	peg	scaffold1|size1664507_175264_176508	175264	176508	+	DNA polymerase IV (EC 2.7.7.7)	FIG00023943	idu(1);DNA_repair,_bacterial
scaffold1|size1664507	fig|6666666.156949.peg.278	peg	scaffold1|size1664507_176618_178027	176618	178027	+	6-phosphogluconate dehydrogenase, decarboxylating (EC 1.1.1.44)	FIG00000405	icw(1);Pentose_phosphate_pathway idu(2);D-gluconate_and_ketogluconates_metabolism
scaffold1|size1664507	fig|6666666.156949.peg.279	peg	scaffold1|size1664507_179608_178139	179608	178139	-	Glucose-6-phosphate 1-dehydrogenase (EC 1.1.1.49)	FIG00000332	isu;Pentose_phosphate_pathway isu;Entner-Doudoroff_Pathway
scaffold1|size1664507	fig|6666666.156949.peg.280	peg	scaffold1|size1664507_179835_180758	179835	180758	+	Ribonuclease Z (EC 3.1.26.11)	FIG00000828	isu;tRNA_processing
scaffold1|size1664507	fig|6666666.156949.peg.281	peg	scaffold1|size1664507_180840_180989	180840	180989	+	LSU ribosomal protein L33p @ LSU ribosomal protein L33p, zinc-independent	NA	isu;Ribosome_LSU_bacterial isu;Ribosome_LSU_bacterial
scaffold1|size1664507	fig|6666666.156949.peg.282	peg	scaffold1|size1664507_181793_181032	181793	181032	-	abhydrolase, alpha/beta hydrolase fold	FIG01340120	NA
scaffold1|size1664507	fig|6666666.156949.peg.283	peg	scaffold1|size1664507_182919_181903	182919	181903	-	NADPH dehydrogenase (EC 1.6.99.1)	FIG01332740	NA
scaffold1|size1664507	fig|6666666.156949.peg.284	peg	scaffold1|size1664507_183091_184734	183091	184734	+	Arginine utilization protein RocB	FIG00016187	idu(1);Arginine_and_Ornithine_Degradation
scaffold1|size1664507	fig|6666666.156949.peg.285	peg	scaffold1|size1664507_185611_184775	185611	184775	-	Pyrroline-5-carboxylate reductase (EC 1.5.1.2)	FIG00133325	idu(1);Proline_Synthesis idu(1);A_Hypothetical_Protein_Related_to_Proline_Metabolism
scaffold1|size1664507	fig|6666666.156949.peg.286	peg	scaffold1|size1664507_186016_186975	186016	186975	+	Hydroxyacylglutathione hydrolase (EC 3.1.2.6)	FIG00000013	isu;Glutathione:_Non-redox_reactions isu;Methylglyoxal_Metabolism
scaffold1|size1664507	fig|6666666.156949.peg.287	peg	scaffold1|size1664507_186981_187760	186981	187760	+	oxidoreductase, short-chain dehydrogenase/reductase family	FIG01965431	NA
scaffold1|size1664507	fig|6666666.156949.peg.288	peg	scaffold1|size1664507_187836_189182	187836	189182	+	D-serine dehydratase (EC 4.3.1.18)	FIG00001695	isu;Glycine_and_Serine_Utilization isu;Pyruvate_Alanine_Serine_Interconversions
scaffold1|size1664507	fig|6666666.156949.peg.289	peg	scaffold1|size1664507_189254_190213	189254	190213	+	Pantothenate kinase (EC 2.7.1.33)	FIG00000936	isu;Coenzyme_A_Biosynthesis
scaffold1|size1664507	fig|6666666.156949.peg.290	peg	scaffold1|size1664507_190218_190604	190218	190604	+	Possible glyoxylase family protein (Lactoylglutathione lyase) (EC 4.4.1.5)	FIG01347028	NA
scaffold1|size1664507	fig|6666666.156949.peg.291	peg	scaffold1|size1664507_190759_190601	190759	190601	-	FIG01228864: hypothetical protein	FIG01228860	NA
scaffold1|size1664507	fig|6666666.156949.peg.292	peg	scaffold1|size1664507_192042_190789	192042	190789	-	Multidrug resistance protein B	FIG01356213	NA
scaffold1|size1664507	fig|6666666.156949.peg.293	peg	scaffold1|size1664507_192338_192574	192338	192574	+	hypothetical protein	NA	NA
scaffold1|size1664507	fig|6666666.156949.peg.294	peg	scaffold1|size1664507_192801_192595	192801	192595	-	unknown	NA	NA
scaffold1|size1664507	fig|6666666.156949.peg.295	peg	scaffold1|size1664507_192970_194205	192970	194205	+	DNA polymerase IV (EC 2.7.7.7)	FIG00023943	idu(1);DNA_repair,_bacterial
scaffold1|size1664507	fig|6666666.156949.peg.296	peg	scaffold1|size1664507_194202_194540	194202	194540	+	FIG01235421: hypothetical protein	FIG01235417	NA
scaffold1|size1664507	fig|6666666.156949.peg.297	peg	scaffold1|size1664507_194726_195196	194726	195196	+	YqjY	FIG01228707	NA
scaffold1|size1664507	fig|6666666.156949.peg.298	peg	scaffold1|size1664507_195207_195551	195207	195551	+	FIG01243648: hypothetical protein	FIG01243647	NA
scaffold1|size1664507	fig|6666666.156949.peg.299	peg	scaffold1|size1664507_195544_196575	195544	196575	+	N-Acyltransferase superfamily / Uncharacterised protein family UPF0157 (COG2320)	FIG01230721	NA
scaffold1|size1664507	fig|6666666.156949.peg.300	peg	scaffold1|size1664507_196572_196895	196572	196895	+	hypothetical protein	NA	NA
scaffold1|size1664507	fig|6666666.156949.peg.301	peg	scaffold1|size1664507_196908_197147	196908	197147	+	FIG01226063: hypothetical protein	FIG00672983	NA
scaffold1|size1664507	fig|6666666.156949.peg.302	peg	scaffold1|size1664507_198107_197187	198107	197187	-	YqkD	FIG01310534	NA
scaffold1|size1664507	fig|6666666.156949.peg.303	peg	scaffold1|size1664507_198265_198489	198265	198489	+	unknown	NA	NA
scaffold1|size1664507	fig|6666666.156949.peg.304	peg	scaffold1|size1664507_199441_198521	199441	198521	-	Oxidoreductase, aldo/keto reductase family protein	FIG01240797	NA
scaffold1|size1664507	fig|6666666.156949.peg.305	peg	scaffold1|size1664507_199626_199504	199626	199504	-	hypothetical protein	NA	NA
scaffold1|size1664507	fig|6666666.156949.peg.306	peg	scaffold1|size1664507_199701_200258	199701	200258	+	ADP-ribose pyrophosphatase (EC 3.6.1.13)	FIG00000367	isu;NAD_and_NADP_cofactor_biosynthesis_global isu;Ribosome_post-transcriptional_modification_and_chromosomal_segregation_cluster isu;CBSS-342610.3.peg.1794 isu;Nudix_proteins_(nucleoside_triphosphate_hydrolases)
scaffold1|size1664507	fig|6666666.156949.peg.307	peg	scaffold1|size1664507_200255_201418	200255	201418	+	DNA helicase II (EC 3.6.1.-)	FIG01313429	NA
scaffold1|size1664507	fig|6666666.156949.peg.308	peg	scaffold1|size1664507_201777_201427	201777	201427	-	transcriptional regulator AnsR	FIG01326868	NA
scaffold1|size1664507	fig|6666666.156949.peg.309	peg	scaffold1|size1664507_201959_202948	201959	202948	+	L-asparaginase I, cytoplasmic (EC 3.5.1.1)	NA	isu;Glutamine,_Glutamate,_Aspartate_and_Asparagine_Biosynthesis
scaffold1|size1664507	fig|6666666.156949.peg.310	peg	scaffold1|size1664507_202993_204420	202993	204420	+	Aspartate ammonia-lyase (EC 4.3.1.1)	FIG00079822	icw(1);Glutamine,_Glutamate,_Aspartate_and_Asparagine_Biosynthesis
scaffold1|size1664507	fig|6666666.156949.peg.311	peg	scaffold1|size1664507_204561_205967	204561	205967	+	Malate Na(+) symporter	FIG01304383	idu(2);Pyruvate_metabolism_I:_anaplerotic_reactions,_PEP
scaffold1|size1664507	fig|6666666.156949.peg.312	peg	scaffold1|size1664507_205985_207304	205985	207304	+	NAD-dependent malic enzyme (EC 1.1.1.38)	NA	icw(1);Pyruvate_metabolism_I:_anaplerotic_reactions,_PEP
scaffold1|size1664507	fig|6666666.156949.peg.313	peg	scaffold1|size1664507_207334_207618	207334	207618	+	FIG01232010: hypothetical protein	FIG01232009	NA
scaffold1|size1664507	fig|6666666.156949.peg.314	peg	scaffold1|size1664507_207719_208363	207719	208363	+	Stage II sporulation protein M (SpoIIM)	FIG00004545	isu;Sporulation_gene_orphans
scaffold1|size1664507	fig|6666666.156949.peg.315	peg	scaffold1|size1664507_208476_208925	208476	208925	+	Ferric uptake regulation protein FUR	FIG00132630	isu;Oxidative_stress isu;Bacterial_RNA-metabolizing_Zn-dependent_hydrolases
scaffold1|size1664507	fig|6666666.156949.peg.316	peg	scaffold1|size1664507_208952_209065	208952	209065	+	hypothetical protein	NA	NA
scaffold1|size1664507	fig|6666666.156949.peg.317	peg	scaffold1|size1664507_209050_209277	209050	209277	+	FIG01226426: hypothetical protein	FIG01226425	NA
scaffold1|size1664507	fig|6666666.156949.peg.318	peg	scaffold1|size1664507_209285_210175	209285	210175	+	Tyrosine recombinase XerD	FIG01970495	NA
scaffold1|size1664507	fig|6666666.156949.peg.319	peg	scaffold1|size1664507_210336_211520	210336	211520	+	Phosphopentomutase (EC 5.4.2.7)	FIG00000738	icw(1);Deoxyribose_and_Deoxynucleoside_Catabolism
scaffold1|size1664507	fig|6666666.156949.peg.320	peg	scaffold1|size1664507_211533_212348	211533	212348	+	Purine nucleoside phosphorylase (EC 2.4.2.1); N-Ribosylnicotinamide phosphorylase (EC 2.4.2.1)	FIG01955800	idu(2);Purine_conversions isu;NAD_and_NADP_cofactor_biosynthesis_global idu(2);Adenosyl_nucleosidases idu(2);Deoxyribose_and_Deoxynucleoside_Catabolism idu(2);pyrimidine_conversions
scaffold1|size1664507	fig|6666666.156949.peg.321	peg	scaffold1|size1664507_212359_213672	212359	213672	+	D-alanyl-D-alanine carboxypeptidase (EC 3.4.16.4)	FIG00561498	idu(5);Murein_Hydrolases idu(5);Peptidoglycan_Biosynthesis idu(5);CBSS-84588.1.peg.1247 idu(5);Metallocarboxypeptidases_(EC_3.4.17.-)
scaffold1|size1664507	fig|6666666.156949.peg.322	peg	scaffold1|size1664507_213768_214121	213768	214121	+	Anti-sigma F factor antagonist (spoIIAA-2); Anti-sigma B factor antagonist RsbV	FIG00103613	idu(1);SigmaB_stress_responce_regulation
scaffold1|size1664507	fig|6666666.156949.peg.323	peg	scaffold1|size1664507_214118_214558	214118	214558	+	Anti-sigma F factor (EC 2.7.11.1)	FIG01031896	NA
scaffold1|size1664507	fig|6666666.156949.peg.324	peg	scaffold1|size1664507_214570_215337	214570	215337	+	RNA polymerase sporulation specific sigma factor SigF	FIG00003596	icw(4);Sporulation_gene_orphans isu;Transcription_initiation,_bacterial_sigma_factors
scaffold1|size1664507	fig|6666666.156949.peg.325	peg	scaffold1|size1664507_215461_215985,scaffold1|size1664507_215987_216064	215461	216064	+	Stage V sporulation protein AA (SpoVAA)	FIG00013178	isu;Sporulation_gene_orphans
scaffold1|size1664507	fig|6666666.156949.peg.326	peg	scaffold1|size1664507_216074_216499	216074	216499	+	Stage V sporulation protein AB (SpoVAB)	FIG00011842	icw(2);Sporulation_gene_orphans
scaffold1|size1664507	fig|6666666.156949.peg.327	peg	scaffold1|size1664507_216512_216964	216512	216964	+	Stage V sporulation protein AC (SpoVAC)	FIG00002563	icw(3);Sporulation_gene_orphans
scaffold1|size1664507	fig|6666666.156949.peg.328	peg	scaffold1|size1664507_216977_217993	216977	217993	+	Stage V sporulation protein AD (SpoVAD)	FIG00002500	icw(1);Sporulation_gene_orphans
scaffold1|size1664507	fig|6666666.156949.peg.329	peg	scaffold1|size1664507_217995_218333,scaffold1|size1664507_218335_218964	217995	218964	+	Stage V sporulation protein AE (SpoVAE)	FIG00007180	isu;Sporulation_gene_orphans
scaffold1|size1664507	fig|6666666.156949.peg.330	peg	scaffold1|size1664507_218915_220396	218915	220396	+	Stage V sporulation protein AF (SpoVAF)	FIG00013491	isu;Sporulation_gene_orphans
scaffold1|size1664507	fig|6666666.156949.peg.331	peg	scaffold1|size1664507_220496_221821	220496	221821	+	Diaminopimelate decarboxylase (EC 4.1.1.20)	FIG00138250	isu;CBSS-323850.3.peg.3269 isu;Lysine_Biosynthesis_DAP_Pathway isu;Lysine_Biosynthesis_DAP_Pathway,_GJO_scratch
scaffold1|size1664507	fig|6666666.156949.peg.332	peg	scaffold1|size1664507_222723_221851	222723	221851	-	Extracellular protein	FIG01310300	NA
scaffold1|size1664507	fig|6666666.156949.peg.333	peg	scaffold1|size1664507_222763_222897	222763	222897	+	hypothetical protein	NA	NA
scaffold1|size1664507	fig|6666666.156949.peg.334	peg	scaffold1|size1664507_222947_223411	222947	223411	+	Peptidyl-prolyl cis-trans isomerase (EC 5.2.1.8)	FIG01955868	isu;Peptidyl-prolyl_cis-trans_isomerase_containing_cluster isu;Queuosine-Archaeosine_Biosynthesis
scaffold1|size1664507	fig|6666666.156949.peg.335	peg	scaffold1|size1664507_223759_223547	223759	223547	-	YpzD	FIG01679073	NA
scaffold1|size1664507	fig|6666666.156949.peg.336	peg	scaffold1|size1664507_223923_224129	223923	224129	+	FIG01251890: hypothetical protein	FIG01314778	NA
scaffold1|size1664507	fig|6666666.156949.peg.337	peg	scaffold1|size1664507_224577_225131	224577	225131	+	Signal peptidase I (EC 3.4.21.89)	FIG00000015	idu(3);Signal_peptidase idu(3);CBSS-176299.4.peg.1292
scaffold1|size1664507	fig|6666666.156949.peg.338	peg	scaffold1|size1664507_225366_225710	225366	225710	+	unknown	NA	NA
scaffold1|size1664507	fig|6666666.156949.peg.339	peg	scaffold1|size1664507_226105_227190	226105	227190	+	Diaminohydroxyphosphoribosylaminopyrimidine deaminase (EC 3.5.4.26) / 5-amino-6-(5-phosphoribosylamino)uracil reductase (EC 1.1.1.193)	FIG00000384	icw(1);Riboflavin,_FMN_and_FAD_metabolism icw(3);Riboflavin,_FMN_and_FAD_metabolism icw(1);Riboflavin_synthesis_cluster icw(3);Riboflavin_synthesis_cluster
scaffold1|size1664507	fig|6666666.156949.peg.340	peg	scaffold1|size1664507_227201_227848	227201	227848	+	Riboflavin synthase eubacterial/eukaryotic (EC 2.5.1.9)	FIG00000273	icw(3);Riboflavin,_FMN_and_FAD_metabolism isu;riboflavin_to_FAD icw(3);Riboflavin_synthesis_cluster
scaffold1|size1664507	fig|6666666.156949.peg.341	peg	scaffold1|size1664507_227863_229059	227863	229059	+	3,4-dihydroxy-2-butanone 4-phosphate synthase (EC 4.1.99.12) / GTP cyclohydrolase II (EC 3.5.4.25)	FIG00036306	icw(2);Riboflavin,_FMN_and_FAD_metabolism icw(3);Riboflavin,_FMN_and_FAD_metabolism icw(1);riboflavin_to_FAD icw(2);Riboflavin_synthesis_cluster icw(3);Riboflavin_synthesis_cluster isu;Molybdenum_cofactor_biosynthesis
scaffold1|size1664507	fig|6666666.156949.peg.342	peg	scaffold1|size1664507_229092_229556	229092	229556	+	6,7-dimethyl-8-ribityllumazine synthase (EC 2.5.1.78)	FIG00000231	isu;Riboflavin,_FMN_and_FAD_metabolism isu;Riboflavin_synthesis_cluster
scaffold1|size1664507	fig|6666666.156949.peg.343	peg	scaffold1|size1664507_229669_230043	229669	230043	+	RibT protein	FIG01226832	NA
scaffold1|size1664507	fig|6666666.156949.peg.344	peg	scaffold1|size1664507_230581_230057	230581	230057	-	DUF309 domain-containing protein	FIG01330986	NA
scaffold1|size1664507	fig|6666666.156949.peg.345	peg	scaffold1|size1664507_230863_231618	230863	231618	+	Segregation and condensation protein A	FIG00019652	icw(1);CBSS-314276.3.peg.1499 icw(2);Ribosome_post-transcriptional_modification_and_chromosomal_segregation_cluster
scaffold1|size1664507	fig|6666666.156949.peg.346	peg	scaffold1|size1664507_231608_232201	231608	232201	+	Segregation and condensation protein B	FIG00133569	isu;CBSS-314276.3.peg.1499 icw(1);Ribosome_post-transcriptional_modification_and_chromosomal_segregation_cluster isu;CBSS-203122.12.peg.188
scaffold1|size1664507	fig|6666666.156949.peg.347	peg	scaffold1|size1664507_232256_232795	232256	232795	+	FIG01226807: hypothetical protein	FIG01226803	NA
scaffold1|size1664507	fig|6666666.156949.peg.348	peg	scaffold1|size1664507_232918_234066	232918	234066	+	D-alanyl-D-alanine carboxypeptidase (EC 3.4.16.4)	FIG00561498	idu(5);Murein_Hydrolases idu(5);Peptidoglycan_Biosynthesis idu(5);CBSS-84588.1.peg.1247 idu(5);Metallocarboxypeptidases_(EC_3.4.17.-)
scaffold1|size1664507	fig|6666666.156949.peg.349	peg	scaffold1|size1664507_234054_234644	234054	234644	+	Spore maturation protein A	FIG00003439	icw(1);Spore_Core_Dehydration
scaffold1|size1664507	fig|6666666.156949.peg.350	peg	scaffold1|size1664507_234649_235185	234649	235185	+	Spore maturation protein B	FIG00007495	isu;Spore_Core_Dehydration
scaffold1|size1664507	fig|6666666.156949.peg.351	peg	scaffold1|size1664507_235277_236011	235277	236011	+	Ribosomal large subunit pseudouridine synthase B (EC 4.2.1.70)	FIG00869624	icw(2);CBSS-314276.3.peg.1499 isu;Ribosome_post-transcriptional_modification_and_chromosomal_segregation_cluster isu;RNA_pseudouridine_syntheses
scaffold1|size1664507	fig|6666666.156949.peg.352	peg	scaffold1|size1664507_236099_236221,scaffold1|size1664507_236223_236645	236099	236645	+	Cytochrome c-type biogenesis protein ResA	FIG00033907	isu;Biogenesis_of_c-type_cytochromes
scaffold1|size1664507	fig|6666666.156949.peg.353	peg	scaffold1|size1664507_236642_238270	236642	238270	+	Cytochrome c-type biogenesis protein Ccs1/ResB	FIG00005336	isu;Biogenesis_of_c-type_cytochromes
scaffold1|size1664507	fig|6666666.156949.peg.354	peg	scaffold1|size1664507_238290_239465	238290	239465	+	Cytochrome c-type biogenesis protein CcsA/ResC	FIG00001246	icw(1);Biogenesis_of_c-type_cytochromes isu;CBSS-196164.1.peg.461
scaffold1|size1664507	fig|6666666.156949.peg.355	peg	scaffold1|size1664507_239546_240268	239546	240268	+	DNA-binding response regulator ResD	FIG00011465	NA
scaffold1|size1664507	fig|6666666.156949.peg.356	peg	scaffold1|size1664507_240265_242034	240265	242034	+	Osmosensitive K+ channel histidine kinase KdpD (EC 2.7.3.-)	FIG00000846	isu;Potassium_homeostasis
scaffold1|size1664507	fig|6666666.156949.peg.357	peg	scaffold1|size1664507_242238_242822	242238	242822	+	RNA polymerase sigma factor SigX	FIG01643040	NA
scaffold1|size1664507	fig|6666666.156949.peg.358	peg	scaffold1|size1664507_242797_243861	242797	243861	+	Sigma-X negative effector	FIG01233692	NA
scaffold1|size1664507	fig|6666666.156949.peg.359	peg	scaffold1|size1664507_243971_244738	243971	244738	+	3-dehydroquinate dehydratase I (EC 4.2.1.10)	FIG00001170	isu;Chorismate_Synthesis isu;Common_Pathway_For_Synthesis_of_Aromatic_Compounds_(DAHP_synthase_to_chorismate) isu;Quinate_degradation
scaffold1|size1664507	fig|6666666.156949.peg.360	peg	scaffold1|size1664507_246358_244781	246358	244781	-	D-3-phosphoglycerate dehydrogenase (EC 1.1.1.95)	FIG00031250	isu;Pyridoxin_(Vitamin_B6)_Biosynthesis isu;Glycine_and_Serine_Utilization isu;Serine_Biosynthesis
scaffold1|size1664507	fig|6666666.156949.peg.361	peg	scaffold1|size1664507_246615_246749	246615	246749	+	Uncharacterized protein ypzE	FIG01239506	NA
scaffold1|size1664507	fig|6666666.156949.peg.362	peg	scaffold1|size1664507_246855_247427	246855	247427	+	Substrate-specific component RibU of riboflavin ECF transporter	FIG00009156	isu;ECF_class_transporters isu;Riboflavin,_FMN_and_FAD_metabolism
scaffold1|size1664507	fig|6666666.156949.peg.363	peg	scaffold1|size1664507_247715_247467	247715	247467	-	Ferredoxin	FIG00001676	idu(2);Soluble_cytochromes_and_functionally_related_electron_carriers idu(2);Inorganic_Sulfur_Assimilation
scaffold1|size1664507	fig|6666666.156949.peg.364	peg	scaffold1|size1664507_247981_249039	247981	249039	+	FIG00743178: hypothetical protein	FIG00743177	NA
scaffold1|size1664507	fig|6666666.156949.peg.365	peg	scaffold1|size1664507_249032_250522	249032	250522	+	ATP-dependent DNA helicase RecS (RecQ family)	NA	isu;DNA_repair,_bacterial_RecFOR_pathway
scaffold1|size1664507	fig|6666666.156949.peg.366	peg	scaffold1|size1664507_250549_251151	250549	251151	+	CAAX amino terminal protease family protein	FIG00745068	NA
scaffold1|size1664507	fig|6666666.156949.peg.367	peg	scaffold1|size1664507_251102_251833	251102	251833	+	FIG01227733: hypothetical protein	FIG01227732	NA
scaffold1|size1664507	fig|6666666.156949.peg.368	peg	scaffold1|size1664507_251896_252339	251896	252339	+	FIG01232489: hypothetical protein	FIG01232487	NA
scaffold1|size1664507	fig|6666666.156949.peg.369	peg	scaffold1|size1664507_252426_253205	252426	253205	+	Phosphoesterase	FIG01238380	NA
scaffold1|size1664507	fig|6666666.156949.peg.370	peg	scaffold1|size1664507_253364_253948	253364	253948	+	Negative regulator of genetic competence MecA	FIG00005813	idu(1);Gram_Positive_Competence
scaffold1|size1664507	fig|6666666.156949.peg.371	peg	scaffold1|size1664507_254104_255378	254104	255378	+	NAD-specific glutamate dehydrogenase (EC 1.4.1.2)	FIG00011402	idu(1);Glutamine,_Glutamate,_Aspartate_and_Asparagine_Biosynthesis idu(1);Glutamate_dehydrogenases
scaffold1|size1664507	fig|6666666.156949.peg.372	peg	scaffold1|size1664507_255487_256461	255487	256461	+	Thioredoxin reductase (EC 1.8.1.9)	FIG01955919	idu(3);pyrimidine_conversions idu(3);Glycine_reductase,_sarcosine_reductase_and_betaine_reductase idu(3);Thioredoxin-disulfide_reductase
scaffold1|size1664507	fig|6666666.156949.peg.373	peg	scaffold1|size1664507_256581_257237	256581	257237	+	FIG00895122: hypothetical protein	FIG01226482	NA
scaffold1|size1664507	fig|6666666.156949.peg.374	peg	scaffold1|size1664507_257376_258293	257376	258293	+	Spore cortex-lytic enzyme, lytic transglycosylase SleB	FIG00005089	icw(1);Spore_germination
scaffold1|size1664507	fig|6666666.156949.peg.375	peg	scaffold1|size1664507_258328_259680	258328	259680	+	Spore germination protein YpeB	FIG00012446	isu;Spore_germination
scaffold1|size1664507	fig|6666666.156949.peg.376	peg	scaffold1|size1664507_259774_260427	259774	260427	+	FIG01234995: hypothetical protein	FIG01226458	NA
scaffold1|size1664507	fig|6666666.156949.peg.377	peg	scaffold1|size1664507_260472_260648	260472	260648	+	alternate gene name: jofB	FIG01228726	NA
scaffold1|size1664507	fig|6666666.156949.peg.378	peg	scaffold1|size1664507_260727_261401	260727	261401	+	Cytidylate kinase (EC 2.7.4.25)	FIG00041008	isu;Ribosome_post-transcriptional_modification_and_chromosomal_segregation_cluster isu;pyrimidine_conversions
scaffold1|size1664507	fig|6666666.156949.peg.379	peg	scaffold1|size1664507_261634_262782	261634	262782	+	SSU ribosomal protein S1p	FIG00000210	idu(1);Cell_division-ribosomal_stress_proteins_cluster
scaffold1|size1664507	fig|6666666.156949.peg.380	peg	scaffold1|size1664507_262795_263844	262795	263844	+	Isopentenyl-diphosphate delta-isomerase, FMN-dependent (EC 5.3.3.2)	FIG00001120	isu;Isoprenoid_Biosynthesis isu;Isoprenoid_Biosynthesis:_Interconversions
scaffold1|size1664507	fig|6666666.156949.peg.381	peg	scaffold1|size1664507_264018_263887	264018	263887	-	hypothetical protein	NA	NA
scaffold1|size1664507	fig|6666666.156949.peg.382	peg	scaffold1|size1664507_264096_264695	264096	264695	+	membrane protein, putative	FIG00439698	NA
scaffold1|size1664507	fig|6666666.156949.peg.383	peg	scaffold1|size1664507_264692_265585	264692	265585	+	putative membrane protein	FIG00092051	NA
scaffold1|size1664507	fig|6666666.156949.peg.384	peg	scaffold1|size1664507_265582_265776	265582	265776	+	FIG01227225: hypothetical protein	FIG01227224	NA
scaffold1|size1664507	fig|6666666.156949.peg.385	peg	scaffold1|size1664507_265930_267240	265930	267240	+	GTP-binding protein EngA	FIG00129616	isu;Ribosome_post-transcriptional_modification_and_chromosomal_segregation_cluster isu;CBSS-290633.1.peg.1906 isu;Universal_GTPases
scaffold1|size1664507	fig|6666666.156949.peg.386	peg	scaffold1|size1664507_267258_268295	267258	268295	+	Glycerol-3-phosphate dehydrogenase [NAD(P)+] (EC 1.1.1.94)	FIG00000309	isu;Glycerol_and_Glycerol-3-phosphate_Uptake_and_Utilization isu;Glycerolipid_and_Glycerophospholipid_Metabolism_in_Bacteria
scaffold1|size1664507	fig|6666666.156949.peg.387	peg	scaffold1|size1664507_268633_268836	268633	268836	+	FIG01226975: hypothetical protein	FIG01226974	NA
scaffold1|size1664507	fig|6666666.156949.peg.388	peg	scaffold1|size1664507_268858_269592	268858	269592	+	ABC transporter periplasmic binding protein yphF	FIG00674280	NA
scaffold1|size1664507	fig|6666666.156949.peg.389	peg	scaffold1|size1664507_269773_271251	269773	271251	+	Stage IV sporulation protein A	FIG00003654	isu;Sporulation_gene_orphans
scaffold1|size1664507	fig|6666666.156949.peg.390	peg	scaffold1|size1664507_271625_271476	271625	271476	-	hypothetical protein	NA	NA
scaffold1|size1664507	fig|6666666.156949.peg.391	peg	scaffold1|size1664507_271624_271902	271624	271902	+	DNA-binding protein HBsu	FIG00002412	isu;DNA_structural_proteins,_bacterial
scaffold1|size1664507	fig|6666666.156949.peg.392	peg	scaffold1|size1664507_272090_272662	272090	272662	+	GTP cyclohydrolase I (EC 3.5.4.16) type 1	FIG00000226	isu;tRNA_modification_Bacteria isu;Folate_biosynthesis_cluster isu;Zinc_regulated_enzymes isu;Folate_Biosynthesis isu;Queuosine-Archaeosine_Biosynthesis isu;Molybdenum_cofactor_biosynthesis
scaffold1|size1664507	fig|6666666.156949.peg.393	peg	scaffold1|size1664507_272684_272911	272684	272911	+	transcription attenuation protein MtrB	FIG00895269	NA
scaffold1|size1664507	fig|6666666.156949.peg.394	peg	scaffold1|size1664507_273075_273830	273075	273830	+	Heptaprenyl diphosphate synthase component I (EC 2.5.1.30)	FIG00004229	icw(1);Polyprenyl_Diphosphate_Biosynthesis icw(1);Isoprenoinds_for_Quinones icw(1);Sex_pheromones_in_Enterococcus_faecalis_and_other_Firmicutes
scaffold1|size1664507	fig|6666666.156949.peg.395	peg	scaffold1|size1664507_273837_274538	273837	274538	+	2-heptaprenyl-1,4-naphthoquinone methyltransferase MenG (EC 2.1.1.163)	NA	NA
scaffold1|size1664507	fig|6666666.156949.peg.396	peg	scaffold1|size1664507_274564_275526	274564	275526	+	Heptaprenyl diphosphate synthase component II (EC 2.5.1.30)	FIG00002487	isu;Polyprenyl_Diphosphate_Biosynthesis isu;Isoprenoinds_for_Quinones isu;Sex_pheromones_in_Enterococcus_faecalis_and_other_Firmicutes
scaffold1|size1664507	fig|6666666.156949.peg.397	peg	scaffold1|size1664507_275756_276091	275756	276091	+	Nucleoside diphosphate kinase (EC 2.7.4.6)	FIG00000251	isu;Purine_conversions isu;pyrimidine_conversions
scaffold1|size1664507	fig|6666666.156949.peg.398	peg	scaffold1|size1664507_276201_276088	276201	276088	-	hypothetical protein	NA	NA
scaffold1|size1664507	fig|6666666.156949.peg.399	peg	scaffold1|size1664507_276328_277098	276328	277098	+	Chemotaxis protein methyltransferase CheR (EC 2.1.1.80)	FIG00000452	isu;Bacterial_Chemotaxis
scaffold1|size1664507	fig|6666666.156949.peg.400	peg	scaffold1|size1664507_277173_278345	277173	278345	+	Chorismate synthase (EC 4.2.3.5)	FIG00000212	icw(2);Chorismate_Synthesis icw(1);Common_Pathway_For_Synthesis_of_Aromatic_Compounds_(DAHP_synthase_to_chorismate)
scaffold1|size1664507	fig|6666666.156949.peg.401	peg	scaffold1|size1664507_278345_279433	278345	279433	+	3-dehydroquinate synthase (EC 4.2.3.4)	FIG00000224	icw(1);Chorismate_Synthesis isu;Common_Pathway_For_Synthesis_of_Aromatic_Compounds_(DAHP_synthase_to_chorismate)
scaffold1|size1664507	fig|6666666.156949.peg.402	peg	scaffold1|size1664507_279430_279813	279430	279813	+	Chorismate mutase II (EC 5.4.99.5)	FIG00002036	isu;Chorismate_Synthesis isu;Phenylalanine_and_Tyrosine_Branches_from_Chorismate
scaffold1|size1664507	fig|6666666.156949.peg.403	peg	scaffold1|size1664507_280030_281577	280030	281577	+	Anthranilate synthase, aminase component (EC 4.1.3.27)	FIG01960111	icw(4);Chorismate:_Intermediate_for_synthesis_of_Tryptophan,_PAPA_antibiotics,_PABA,_3-hydroxyanthranilate_and_more. icw(4);Tryptophan_synthesis
scaffold1|size1664507	fig|6666666.156949.peg.404	peg	scaffold1|size1664507_281549_282565	281549	282565	+	Anthranilate phosphoribosyltransferase (EC 2.4.2.18)	FIG00062957	icw(1);Chorismate:_Intermediate_for_synthesis_of_Tryptophan,_PAPA_antibiotics,_PABA,_3-hydroxyanthranilate_and_more. icw(1);Tryptophan_synthesis icw(1);Auxin_biosynthesis
scaffold1|size1664507	fig|6666666.156949.peg.405	peg	scaffold1|size1664507_282558_283310	282558	283310	+	Indole-3-glycerol phosphate synthase (EC 4.1.1.48)	FIG00135159	icw(3);Chorismate:_Intermediate_for_synthesis_of_Tryptophan,_PAPA_antibiotics,_PABA,_3-hydroxyanthranilate_and_more. icw(3);Tryptophan_synthesis
scaffold1|size1664507	fig|6666666.156949.peg.406	peg	scaffold1|size1664507_283315_283962	283315	283962	+	Phosphoribosylanthranilate isomerase (EC 5.3.1.24)	FIG00069722	icw(5);Chorismate:_Intermediate_for_synthesis_of_Tryptophan,_PAPA_antibiotics,_PABA,_3-hydroxyanthranilate_and_more. icw(5);Tryptophan_synthesis icw(3);Auxin_biosynthesis
scaffold1|size1664507	fig|6666666.156949.peg.407	peg	scaffold1|size1664507_283943_285145	283943	285145	+	Tryptophan synthase beta chain (EC 4.2.1.20)	FIG00116323	icw(2);Chorismate:_Intermediate_for_synthesis_of_Tryptophan,_PAPA_antibiotics,_PABA,_3-hydroxyanthranilate_and_more. icw(2);Tryptophan_synthesis icw(2);Auxin_biosynthesis
scaffold1|size1664507	fig|6666666.156949.peg.408	peg	scaffold1|size1664507_285138_285941	285138	285941	+	Tryptophan synthase alpha chain (EC 4.2.1.20)	FIG00105533	isu;Chorismate:_Intermediate_for_synthesis_of_Tryptophan,_PAPA_antibiotics,_PABA,_3-hydroxyanthranilate_and_more. isu;Tryptophan_synthesis isu;Auxin_biosynthesis
scaffold1|size1664507	fig|6666666.156949.peg.409	peg	scaffold1|size1664507_285952_287034	285952	287034	+	Biosynthetic Aromatic amino acid aminotransferase beta (EC 2.6.1.57) @ Histidinol-phosphate aminotransferase (EC 2.6.1.9)	NA	isu;Phenylalanine_and_Tyrosine_Branches_from_Chorismate isu;Histidine_Biosynthesis
scaffold1|size1664507	fig|6666666.156949.peg.410	peg	scaffold1|size1664507_287083_288198	287083	288198	+	Prephenate dehydrogenase (EC 1.3.1.12)	FIG00132787	icw(1);Chorismate_Synthesis icw(1);Phenylalanine_and_Tyrosine_Branches_from_Chorismate
scaffold1|size1664507	fig|6666666.156949.peg.411	peg	scaffold1|size1664507_288209_289495	288209	289495	+	5-Enolpyruvylshikimate-3-phosphate synthase (EC 2.5.1.19)	FIG00075970	isu;Chorismate_Synthesis isu;Common_Pathway_For_Synthesis_of_Aromatic_Compounds_(DAHP_synthase_to_chorismate)
scaffold1|size1664507	fig|6666666.156949.peg.412	peg	scaffold1|size1664507_289830_291101	289830	291101	+	FIG009300: TPR-repeat-containing protein	NA	icw(2);TPR-repeat-containing_protein_cluster_1
scaffold1|size1664507	fig|6666666.156949.peg.413	peg	scaffold1|size1664507_291173_291712	291173	291712	+	FIG003190: hypothetical protein co-occurring with TPR domain protein	FIG01307049	isu;TPR-repeat-containing_protein_cluster_1
scaffold1|size1664507	fig|6666666.156949.peg.414	peg	scaffold1|size1664507_291767_292213	291767	292213	+	FIG013069: hypothetical protein co-occurring with TPR domain protein	FIG01226673	icw(1);TPR-repeat-containing_protein_cluster_1
scaffold1|size1664507	fig|6666666.156949.peg.415	peg	scaffold1|size1664507_292355_292858	292355	292858	+	Menaquinone-cytochrome C reductase iron-sulfur subunit	FIG00099294	icw(2);Ubiquinone_Menaquinone-cytochrome_c_reductase_complexes
scaffold1|size1664507	fig|6666666.156949.peg.416	peg	scaffold1|size1664507_292860_293534	292860	293534	+	Menaquinone-cytochrome c reductase, cytochrome B subunit	FIG00004998	isu;Ubiquinone_Menaquinone-cytochrome_c_reductase_complexes
scaffold1|size1664507	fig|6666666.156949.peg.417	peg	scaffold1|size1664507_293569_294336	293569	294336	+	Menaquinone-cytochrome C oxidoreductase, cytochrome C subunit	FIG00006680	icw(1);Ubiquinone_Menaquinone-cytochrome_c_reductase_complexes
scaffold1|size1664507	fig|6666666.156949.peg.418	peg	scaffold1|size1664507_294447_295040	294447	295040	+	Hypothetical transmembrane protein CDS_ID OB1773	FIG00009026	NA
scaffold1|size1664507	fig|6666666.156949.peg.419	peg	scaffold1|size1664507_295109_295903	295109	295903	+	FIG01227150: hypothetical protein	FIG01227149	NA
scaffold1|size1664507	fig|6666666.156949.peg.420	peg	scaffold1|size1664507_296817_295945	296817	295945	-	hypothetical protein BH3604	FIG00006868	idu(1);CBSS-393121.3.peg.2760
scaffold1|size1664507	fig|6666666.156949.peg.421	peg	scaffold1|size1664507_296957_297292	296957	297292	+	MazG nucleotide pyrophosphohydrolase	FIG00790235	NA
scaffold1|size1664507	fig|6666666.156949.peg.422	peg	scaffold1|size1664507_297304_298107	297304	298107	+	4-hydroxy-tetrahydrodipicolinate reductase (EC 1.17.1.8)	FIG00000347	isu;Lysine_Biosynthesis_DAP_Pathway isu;Lysine_Biosynthesis_DAP_Pathway,_GJO_scratch
scaffold1|size1664507	fig|6666666.156949.peg.423	peg	scaffold1|size1664507_298123_298536	298123	298536	+	Methylglyoxal synthase (EC 4.2.3.3)	FIG00000967	isu;CBSS-83333.1.peg.946 isu;Methylglyoxal_Metabolism
scaffold1|size1664507	fig|6666666.156949.peg.424	peg	scaffold1|size1664507_298529_299239	298529	299239	+	Lmbe-related protein	FIG00895127	NA
scaffold1|size1664507	fig|6666666.156949.peg.425	peg	scaffold1|size1664507_299236_300369	299236	300369	+	Glycosyl transferase, group 1 family protein	FIG00009775	isu;Exopolysaccharide_Biosynthesis
scaffold1|size1664507	fig|6666666.156949.peg.426	peg	scaffold1|size1664507_300374_301567	300374	301567	+	tRNA nucleotidyltransferase (EC 2.7.7.21) (EC 2.7.7.25)	FIG00000289	isu;A_cluster_relating_to_Tryptophanyl-tRNA_synthetase isu;tRNA_nucleotidyltransferase isu;Polyadenylation_bacterial
scaffold1|size1664507	fig|6666666.156949.peg.427	peg	scaffold1|size1664507_301552_302529	301552	302529	+	Biotin--protein ligase (EC 6.3.4.9, EC 6.3.4.10, EC 6.3.4.11, EC 6.3.4.15) / Biotin operon repressor	FIG00000692	isu;Biotin_biosynthesis
scaffold1|size1664507	fig|6666666.156949.peg.428	peg	scaffold1|size1664507_302747_302601	302747	302601	-	hypothetical protein	NA	NA
scaffold1|size1664507	fig|6666666.156949.peg.429	peg	scaffold1|size1664507_302775_303608	302775	303608	+	3-methyl-2-oxobutanoate hydroxymethyltransferase (EC 2.1.2.11)	FIG00000364	isu;Coenzyme_A_Biosynthesis_cluster isu;Coenzyme_A_Biosynthesis
scaffold1|size1664507	fig|6666666.156949.peg.430	peg	scaffold1|size1664507_303610_304470	303610	304470	+	Pantoate--beta-alanine ligase (EC 6.3.2.1)	FIG00000440	icw(1);Folate_biosynthesis_cluster icw(1);Coenzyme_A_Biosynthesis_cluster icw(2);Coenzyme_A_Biosynthesis
scaffold1|size1664507	fig|6666666.156949.peg.431	peg	scaffold1|size1664507_304472_304855	304472	304855	+	Aspartate 1-decarboxylase (EC 4.1.1.11)	FIG00008304	isu;Folate_biosynthesis_cluster icw(2);Coenzyme_A_Biosynthesis_cluster icw(1);Coenzyme_A_Biosynthesis
scaffold1|size1664507	fig|6666666.156949.peg.432	peg	scaffold1|size1664507_304981_307776	304981	307776	+	DinG family ATP-dependent helicase YoaA	FIG00000680	isu;DNA_repair,_bacterial_DinG_and_relatives
scaffold1|size1664507	fig|6666666.156949.peg.433	peg	scaffold1|size1664507_307919_308089	307919	308089	+	FIG01226635: hypothetical protein	FIG01226634	NA
scaffold1|size1664507	fig|6666666.156949.peg.434	peg	scaffold1|size1664507_308098_308583	308098	308583	+	FIG01226722: hypothetical protein	FIG01226721	NA
scaffold1|size1664507	fig|6666666.156949.peg.435	peg	scaffold1|size1664507_308606_309787	308606	309787	+	Aspartate aminotransferase (EC 2.6.1.1)	FIG00719736	idu(7);Glutamine,_Glutamate,_Aspartate_and_Asparagine_Biosynthesis idu(7);Threonine_and_Homoserine_Biosynthesis
scaffold1|size1664507	fig|6666666.156949.peg.436	peg	scaffold1|size1664507_309928_311223	309928	311223	+	Asparaginyl-tRNA synthetase (EC 6.1.1.22)	FIG00000636	isu;tRNA_aminoacylation,_Asp_and_Asn
scaffold1|size1664507	fig|6666666.156949.peg.437	peg	scaffold1|size1664507_311316_312014	311316	312014	+	Chromosome replication initiation protein DnaD	FIG00001781	isu;Control_of_cell_elongation_-_division_cycle_in_Bacilli
scaffold1|size1664507	fig|6666666.156949.peg.438	peg	scaffold1|size1664507_312033_312692	312033	312692	+	Endonuclease III (EC 4.2.99.18)	FIG00000290	isu;DNA_Repair_Base_Excision icw(2);Control_of_cell_elongation_-_division_cycle_in_Bacilli
scaffold1|size1664507	fig|6666666.156949.peg.439	peg	scaffold1|size1664507_312689_313183	312689	313183	+	Hypothetical protein in cluster with penicillin-binding protein PBP1, Bacillus type	FIG00013168	icw(5);Control_of_cell_elongation_-_division_cycle_in_Bacilli
scaffold1|size1664507	fig|6666666.156949.peg.440	peg	scaffold1|size1664507_316008_313258	316008	313258	-	Multimodular transpeptidase-transglycosylase (EC 2.4.1.129) (EC 3.4.-.-) / Penicillin-binding protein 1A/1B (PBP1)	FIG00007126	idu(2);Peptidoglycan_Biosynthesis icw(4);Control_of_cell_elongation_-_division_cycle_in_Bacilli isu;Methicillin_resistance_in_Staphylococci
scaffold1|size1664507	fig|6666666.156949.peg.441	peg	scaffold1|size1664507_316650_316030	316650	316030	-	RecU Holliday junction resolvase	FIG00001605	icw(3);Control_of_cell_elongation_-_division_cycle_in_Bacilli isu;DNA_repair,_bacterial_RecFOR_pathway
scaffold1|size1664507	fig|6666666.156949.peg.442	peg	scaffold1|size1664507_316691_317653	316691	317653	+	Uncharacterized protein YppC	FIG00012860	isu;Control_of_cell_elongation_-_division_cycle_in_Bacilli
scaffold1|size1664507	fig|6666666.156949.peg.443	peg	scaffold1|size1664507_317812_317678	317812	317678	-	hypothetical protein	NA	NA
scaffold1|size1664507	fig|6666666.156949.peg.444	peg	scaffold1|size1664507_317981_318226	317981	318226	+	Uncharacterized protein yppD	FIG01231143	NA
scaffold1|size1664507	fig|6666666.156949.peg.445	peg	scaffold1|size1664507_318272_318643	318272	318643	+	FIG01226164: hypothetical protein	FIG01226163	NA
scaffold1|size1664507	fig|6666666.156949.peg.446	peg	scaffold1|size1664507_318870_318682	318870	318682	-	FIG01225233: hypothetical protein	FIG01225232	NA
scaffold1|size1664507	fig|6666666.156949.peg.447	peg	scaffold1|size1664507_319058_319435	319058	319435	+	Spore coat protein	FIG01317036	NA
scaffold1|size1664507	fig|6666666.156949.peg.448	peg	scaffold1|size1664507_319875_319456	319875	319456	-	unknown	NA	NA
scaffold1|size1664507	fig|6666666.156949.peg.449	peg	scaffold1|size1664507_319962_320519	319962	320519	+	PTS system, glucose-specific IIA component	FIG00668821	NA
scaffold1|size1664507	fig|6666666.156949.peg.450	peg	scaffold1|size1664507_320622_322871	320622	322871	+	ATP-dependent RNA helicase	FIG01231651	NA
scaffold1|size1664507	fig|6666666.156949.peg.451	peg	scaffold1|size1664507_322887_324128	322887	324128	+	Predicted exonuclease	FIG01228320	NA
scaffold1|size1664507	fig|6666666.156949.peg.452	peg	scaffold1|size1664507_324229_324357	324229	324357	+	hypothetical protein	NA	NA
scaffold1|size1664507	fig|6666666.156949.peg.453	peg	scaffold1|size1664507_324753_325301	324753	325301	+	FIG005686: hypothetical protein	FIG00005686	icw(2);Control_of_cell_elongation_-_division_cycle_in_Bacilli
scaffold1|size1664507	fig|6666666.156949.peg.454	peg	scaffold1|size1664507_325377_325673	325377	325673	+	Cell division protein GpsB, coordinates the switch between cylindrical and septal cell wall synthesis by re-localization of PBP1	FIG00001726	isu;Control_of_cell_elongation_-_division_cycle_in_Bacilli
scaffold1|size1664507	fig|6666666.156949.peg.455	peg	scaffold1|size1664507_326220_327377	326220	327377	+	FIG001721: Predicted N6-adenine-specific DNA methylase	FIG00001721	icw(1);Control_of_cell_elongation_-_division_cycle_in_Bacilli
scaffold1|size1664507	fig|6666666.156949.peg.456	peg	scaffold1|size1664507_327746_327937	327746	327937	+	YptA	FIG01229387	NA
scaffold1|size1664507	fig|6666666.156949.peg.457	peg	scaffold1|size1664507_328040_329965	328040	329965	+	DinG family ATP-dependent helicase YpvA	FIG00006803	isu;DNA_repair,_bacterial_DinG_and_relatives
scaffold1|size1664507	fig|6666666.156949.peg.458	peg	scaffold1|size1664507_330771_330007	330771	330007	-	2-deoxy-D-gluconate 3-dehydrogenase (EC 1.1.1.125)	NA	icw(5);D-Galacturonate_and_D-Glucuronate_Utilization
scaffold1|size1664507	fig|6666666.156949.peg.459	peg	scaffold1|size1664507_331600_330773	331600	330773	-	4-deoxy-L-threo-5-hexosulose-uronate ketol-isomerase (EC 5.3.1.17)	FIG00003227	icw(4);D-Galacturonate_and_D-Glucuronate_Utilization
scaffold1|size1664507	fig|6666666.156949.peg.460	peg	scaffold1|size1664507_331822_332841	331822	332841	+	Transcriptional regulator KdgR, KDG operon repressor	FIG00096162	icw(2);D-Galacturonate_and_D-Glucuronate_Utilization
scaffold1|size1664507	fig|6666666.156949.peg.461	peg	scaffold1|size1664507_332879_333853	332879	333853	+	2-dehydro-3-deoxygluconate kinase (EC 2.7.1.45)	FIG00133209	icw(3);D-Galacturonate_and_D-Glucuronate_Utilization isu;Entner-Doudoroff_Pathway isu;D-gluconate_and_ketogluconates_metabolism
scaffold1|size1664507	fig|6666666.156949.peg.462	peg	scaffold1|size1664507_333855_334445	333855	334445	+	4-hydroxy-2-oxoglutarate aldolase (EC 4.1.3.16) @ 2-dehydro-3-deoxyphosphogluconate aldolase (EC 4.1.2.14)	NA	isu;D-Galacturonate_and_D-Glucuronate_Utilization icw(1);Entner-Doudoroff_Pathway
scaffold1|size1664507	fig|6666666.156949.peg.463	peg	scaffold1|size1664507_334490_335482	334490	335482	+	2-keto-3-deoxygluconate permease (KDG permease)	FIG00006715	icw(1);D-Galacturonate_and_D-Glucuronate_Utilization
scaffold1|size1664507	fig|6666666.156949.peg.464	peg	scaffold1|size1664507_335595_337100	335595	337100	+	Thermostable carboxypeptidase 1 (EC 3.4.17.19)	FIG00229345	isu;Metallocarboxypeptidases_(EC_3.4.17.-)
scaffold1|size1664507	fig|6666666.156949.peg.465	peg	scaffold1|size1664507_337431_338015	337431	338015	+	Xanthine phosphoribosyltransferase (EC 2.4.2.22)	FIG00001449	isu;Purine_conversions isu;Xanthine_Metabolism_in_Bacteria
scaffold1|size1664507	fig|6666666.156949.peg.466	peg	scaffold1|size1664507_338012_339328	338012	339328	+	Xanthine permease	NA	icw(1);Xanthine_Metabolism_in_Bacteria idu(3);Purine_Utilization
scaffold1|size1664507	fig|6666666.156949.peg.467	peg	scaffold1|size1664507_339401_340498	339401	340498	+	Chalcone synthase (EC 2.3.1.74)	FIG00443156	isu;Flavanone_biosynthesis
scaffold1|size1664507	fig|6666666.156949.peg.468	peg	scaffold1|size1664507_340502_341008	340502	341008	+	Alkylpyrone O-methyltransferase (B. subtilis BpsB)	FIG00672893	NA
scaffold1|size1664507	fig|6666666.156949.peg.469	peg	scaffold1|size1664507_341344_344925	341344	344925	+	Uncharacterized protein Bsub YpbR	FIG00673969	NA
scaffold1|size1664507	fig|6666666.156949.peg.470	peg	scaffold1|size1664507_344990_345247	344990	345247	+	FIG00675519: hypothetical protein	FIG01233303	NA
scaffold1|size1664507	fig|6666666.156949.peg.471	peg	scaffold1|size1664507_345322_345468	345322	345468	+	hypothetical protein	NA	NA
scaffold1|size1664507	fig|6666666.156949.peg.472	peg	scaffold1|size1664507_345569_346459	345569	346459	+	Probable 5'-3' exonuclease Bsu YpcP	NA	isu;DNA_replication_strays
scaffold1|size1664507	fig|6666666.156949.peg.473	peg	scaffold1|size1664507_346595_346467	346595	346467	-	hypothetical protein	NA	NA
scaffold1|size1664507	fig|6666666.156949.peg.474	peg	scaffold1|size1664507_347035_346637	347035	346637	-	Ribonuclease HI, Bacillus nonfunctional homolog	FIG00010407	isu;Ribonuclease_H
scaffold1|size1664507	fig|6666666.156949.peg.475	peg	scaffold1|size1664507_347724_347035	347724	347035	-	Putative preQ0 transporter	FIG00002792	isu;Queuosine-Archaeosine_Biosynthesis
scaffold1|size1664507	fig|6666666.156949.peg.476	peg	scaffold1|size1664507_347807_348487	347807	348487	+	Uncharacterized protein YpeP	FIG01226343	NA
scaffold1|size1664507	fig|6666666.156949.peg.477	peg	scaffold1|size1664507_348480_348662	348480	348662	+	Glycerate kinase (EC 2.7.1.31)	FIG01320952	idu(1);Glycerate_metabolism idu(1);Serine-glyoxylate_cycle idu(1);Glycine_and_Serine_Utilization idu(1);Allantoin_Utilization idu(1);Glycerolipid_and_Glycerophospholipid_Metabolism_in_Bacteria idu(1);D-galactarate,_D-glucarate_and_D-glycerate_catabolism idu(1);D-galactarate,_D-glucarate_and_D-glycerate_catabolism_-_gjo
scaffold1|size1664507	fig|6666666.156949.peg.478	peg	scaffold1|size1664507_348959_348690	348959	348690	-	hypothetical protein	NA	NA
scaffold1|size1664507	fig|6666666.156949.peg.479	peg	scaffold1|size1664507_349114_349296	349114	349296	+	activation of degradative enzymes (aprE, nprE, sacB)	FIG01228306	NA
scaffold1|size1664507	fig|6666666.156949.peg.480	peg	scaffold1|size1664507_349548_349348	349548	349348	-	Cold shock protein CspD	NA	idu(1);Cold_shock,_CspA_family_of_proteins
scaffold1|size1664507	fig|6666666.156949.peg.481	peg	scaffold1|size1664507_350939_349791	350939	349791	-	diglucosyldiacylglycerol synthase (LTA membrane anchor synthesis)	FIG00010267	idu(1);Teichoic_and_lipoteichoic_acids_biosynthesis
scaffold1|size1664507	fig|6666666.156949.peg.482	peg	scaffold1|size1664507_351183_351055	351183	351055	-	hypothetical protein	NA	NA
scaffold1|size1664507	fig|6666666.156949.peg.483	peg	scaffold1|size1664507_352075_351170	352075	351170	-	Homoserine O-succinyltransferase (EC 2.3.1.46)	FIG00001106	isu;Methionine_Biosynthesis
scaffold1|size1664507	fig|6666666.156949.peg.484	peg	scaffold1|size1664507_352418_352900	352418	352900	+	Glutathione peroxidase family protein	FIG00021745	NA
scaffold1|size1664507	fig|6666666.156949.peg.485	peg	scaffold1|size1664507_352916_353533	352916	353533	+	HD domain protein	FIG01323403	NA
scaffold1|size1664507	fig|6666666.156949.peg.486	peg	scaffold1|size1664507_353593_354726	353593	354726	+	PBS lyase HEAT-like repeat domain protein	FIG01324582	NA
scaffold1|size1664507	fig|6666666.156949.peg.487	peg	scaffold1|size1664507_355015_356691	355015	356691	+	Dihydroxy-acid dehydratase (EC 4.2.1.9)	FIG00138258	isu;Branched-Chain_Amino_Acid_Biosynthesis
scaffold1|size1664507	fig|6666666.156949.peg.488	peg	scaffold1|size1664507_356798_357232	356798	357232	+	FIG01226173: hypothetical protein	FIG01108138	NA
scaffold1|size1664507	fig|6666666.156949.peg.489	peg	scaffold1|size1664507_357274_358047	357274	358047	+	Protein-L-isoD(D-D) O-methyltransferase	FIG01315585	NA
scaffold1|size1664507	fig|6666666.156949.peg.490	peg	scaffold1|size1664507_358334_358918	358334	358918	+	FIG01231694: hypothetical protein	FIG01231691	NA
scaffold1|size1664507	fig|6666666.156949.peg.491	peg	scaffold1|size1664507_358936_359469	358936	359469	+	Low temperature requirement C protein	FIG01350066	NA
scaffold1|size1664507	fig|6666666.156949.peg.492	peg	scaffold1|size1664507_359612_360118	359612	360118	+	Dihydrofolate reductase (EC 1.5.1.3)	FIG00000048	idu(2);5-FCL-like_protein idu(2);Folate_Biosynthesis
scaffold1|size1664507	fig|6666666.156949.peg.493	peg	scaffold1|size1664507_360119_360739	360119	360739	+	unknown	NA	NA
scaffold1|size1664507	fig|6666666.156949.peg.494	peg	scaffold1|size1664507_361420_360779	361420	360779	-	COG1272: Predicted membrane protein hemolysin III homolog	FIG01323667	NA
scaffold1|size1664507	fig|6666666.156949.peg.495	peg	scaffold1|size1664507_362436_361441	362436	361441	-	Nitrogen regulation protein NR(I)	FIG00003546	isu;Ammonia_assimilation
scaffold1|size1664507	fig|6666666.156949.peg.496	peg	scaffold1|size1664507_362685_363953	362685	363953	+	Threonine dehydratase biosynthetic (EC 4.3.1.19)	FIG00001004	isu;Branched-Chain_Amino_Acid_Biosynthesis
scaffold1|size1664507	fig|6666666.156949.peg.497	peg	scaffold1|size1664507_364039_364290	364039	364290	+	unknown	NA	NA
scaffold1|size1664507	fig|6666666.156949.peg.498	peg	scaffold1|size1664507_364429_365019	364429	365019	+	Cytochrome oxidase biogenesis protein Sco1/SenC/PrrC, putative copper metallochaperone	FIG00064434	isu;Biogenesis_of_cytochrome_c_oxidases
scaffold1|size1664507	fig|6666666.156949.peg.499	peg	scaffold1|size1664507_365097_365864	365097	365864	+	FIG006988: Lipase/Acylhydrolase with GDSL-like motif	FIG00006988	icw(1);CBSS-370552.3.peg.1240
scaffold1|size1664507	fig|6666666.156949.peg.500	peg	scaffold1|size1664507_365874_366437	365874	366437	+	YfaA	FIG00137613	isu;CBSS-370552.3.peg.1240
scaffold1|size1664507	fig|6666666.156949.peg.501	peg	scaffold1|size1664507_366450_366644	366450	366644	+	Uncharacterized protein ypmT	FIG01328244	NA
scaffold1|size1664507	fig|6666666.156949.peg.502	peg	scaffold1|size1664507_366716_368053	366716	368053	+	Na+ driven multidrug efflux pump	FIG01199987	NA
scaffold1|size1664507	fig|6666666.156949.peg.503	peg	scaffold1|size1664507_368528_368103	368528	368103	-	Transcriptional regulator, MarR family	FIG00554610	NA
scaffold1|size1664507	fig|6666666.156949.peg.504	peg	scaffold1|size1664507_368660_369193	368660	369193	+	Peptide methionine sulfoxide reductase MsrA (EC 1.8.4.11)	FIG00002199	isu;Peptide_methionine_sulfoxide_reductase isu;Putative_sugar_ABC_transporter_(ytf_cluster)
scaffold1|size1664507	fig|6666666.156949.peg.505	peg	scaffold1|size1664507_369194_369628	369194	369628	+	Peptide methionine sulfoxide reductase MsrB (EC 1.8.4.12)	NA	icw(1);Peptide_methionine_sulfoxide_reductase isu;Unknown_carbohydrate_utilization_(_cluster_Ydj_)
scaffold1|size1664507	fig|6666666.156949.peg.506	peg	scaffold1|size1664507_370697_369672	370697	369672	-	UDP-N-acetylglucosamine 4,6-dehydratase (EC 4.2.1.-)	FIG00003715	idu(1);N-linked_Glycosylation_in_Bacteria
scaffold1|size1664507	fig|6666666.156949.peg.507	peg	scaffold1|size1664507_371068_372216	371068	372216	+	Phy( EC:3.1.3.8 )	FIG01231263	NA
scaffold1|size1664507	fig|6666666.156949.peg.508	peg	scaffold1|size1664507_373144_372287	373144	372287	-	involved in maturation of the outermost layer of the spore	FIG01234495	NA
scaffold1|size1664507	fig|6666666.156949.peg.509	peg	scaffold1|size1664507_373648_373247	373648	373247	-	involved in maturation of the outermost layer of the spore	FIG01234495	NA
scaffold1|size1664507	fig|6666666.156949.peg.510	peg	scaffold1|size1664507_373853_374158	373853	374158	+	involved in maturation of the outermost layer of the spore	FIG01234495	NA
scaffold1|size1664507	fig|6666666.156949.peg.511	peg	scaffold1|size1664507_374223_375503	374223	375503	+	spore coat polysaccharide synthesis	FIG01228374	NA
scaffold1|size1664507	fig|6666666.156949.peg.512	peg	scaffold1|size1664507_375532_376311	375532	376311	+	CgeE	FIG01230817	NA
scaffold1|size1664507	fig|6666666.156949.peg.513	peg	scaffold1|size1664507_376391_376504	376391	376504	+	hypothetical protein	NA	NA
scaffold1|size1664507	fig|6666666.156949.peg.514	peg	scaffold1|size1664507_376498_376653	376498	376653	+	FIG01236913: hypothetical protein	FIG01346872	NA
scaffold1|size1664507	fig|6666666.156949.peg.515	peg	scaffold1|size1664507_376634_377968	376634	377968	+	Adenosylmethionine-8-amino-7-oxononanoate aminotransferase (EC 2.6.1.62)	FIG00012547	idu(2);Biotin_biosynthesis_Experimental idu(2);Biotin_biosynthesis
scaffold1|size1664507	fig|6666666.156949.peg.516	peg	scaffold1|size1664507_377975_378664	377975	378664	+	Acetyl-CoA:acetoacetyl-CoA transferase, alpha subunit (EC 2.8.3.8)	FIG00005698	icw(1);Acetyl-CoA_fermentation_to_Butyrate
scaffold1|size1664507	fig|6666666.156949.peg.517	peg	scaffold1|size1664507_378649_379302	378649	379302	+	Acetyl-CoA:acetoacetyl-CoA transferase, beta subunit (EC 2.8.3.8)	FIG00622136	isu;Acetyl-CoA_fermentation_to_Butyrate
scaffold1|size1664507	fig|6666666.156949.peg.518	peg	scaffold1|size1664507_379317_380621	379317	380621	+	Acetylornithine deacetylase (EC 3.5.1.16)	FIG00020897	isu;Arginine_Biosynthesis_--_gjo isu;Arginine_Biosynthesis_extended
scaffold1|size1664507	fig|6666666.156949.peg.519	peg	scaffold1|size1664507_380599_381426	380599	381426	+	Beta-lysine acetyltransferase (EC 2.3.1.-)	FIG00012793	isu;Lysine_degradation isu;Lysine_fermentation
scaffold1|size1664507	fig|6666666.156949.peg.520	peg	scaffold1|size1664507_381455_382870	381455	382870	+	Lysine 2,3-aminomutase (EC 5.4.3.2)	FIG00134830	icw(1);Lysine_degradation icw(1);Lysine_fermentation
scaffold1|size1664507	fig|6666666.156949.peg.521	peg	scaffold1|size1664507_382867_383145	382867	383145	+	FIG01225564: hypothetical protein	FIG01225563	NA
scaffold1|size1664507	fig|6666666.156949.peg.522	peg	scaffold1|size1664507_383232_383456	383232	383456	+	FIG00673484: hypothetical protein	FIG01964563	NA
scaffold1|size1664507	fig|6666666.156949.peg.523	peg	scaffold1|size1664507_383604_384284	383604	384284	+	IG hypothetical 18022	FIG01316247	NA
scaffold1|size1664507	fig|6666666.156949.peg.524	peg	scaffold1|size1664507_384424_384281	384424	384281	-	hypothetical protein	NA	NA
scaffold1|size1664507	fig|6666666.156949.peg.525	peg	scaffold1|size1664507_384543_384719	384543	384719	+	FIG01227129: hypothetical protein	FIG01227128	NA
scaffold1|size1664507	fig|6666666.156949.peg.526	peg	scaffold1|size1664507_384796_385407	384796	385407	+	PAP2 family protein	FIG01226669	NA
scaffold1|size1664507	fig|6666666.156949.peg.527	peg	scaffold1|size1664507_385471_385782	385471	385782	+	unknown	NA	NA
scaffold1|size1664507	fig|6666666.156949.peg.528	peg	scaffold1|size1664507_385947_385822	385947	385822	-	FIG00673439: hypothetical protein	FIG00673438	NA
scaffold1|size1664507	fig|6666666.156949.peg.529	peg	scaffold1|size1664507_386089_385970	386089	385970	-	hypothetical protein	NA	NA
scaffold1|size1664507	fig|6666666.156949.peg.530	peg	scaffold1|size1664507_386149_386850	386149	386850	+	Purine nucleoside phosphorylase (EC 2.4.2.1)	FIG00000659	idu(2);Purine_conversions idu(2);Adenosyl_nucleosidases idu(2);Deoxyribose_and_Deoxynucleoside_Catabolism idu(2);pyrimidine_conversions
scaffold1|size1664507	fig|6666666.156949.peg.531	peg	scaffold1|size1664507_387009_386857	387009	386857	-	hypothetical protein	NA	NA
scaffold1|size1664507	fig|6666666.156949.peg.532	peg	scaffold1|size1664507_386933_387754	386933	387754	+	D-alanyl-D-alanine carboxypeptidase (EC 3.4.16.4)	FIG00561498	idu(5);Murein_Hydrolases idu(5);Peptidoglycan_Biosynthesis idu(5);CBSS-84588.1.peg.1247 idu(5);Metallocarboxypeptidases_(EC_3.4.17.-)
scaffold1|size1664507	fig|6666666.156949.peg.533	peg	scaffold1|size1664507_388076_387825	388076	387825	-	unknown	NA	NA
scaffold1|size1664507	fig|6666666.156949.peg.534	peg	scaffold1|size1664507_388865_388164	388865	388164	-	Putative methyltransferase YodH	FIG01327939	NA
scaffold1|size1664507	fig|6666666.156949.peg.535	peg	scaffold1|size1664507_389018_390418	389018	390418	+	Carboxyl-terminal protease (EC 3.4.21.102)	FIG00000946	idu(1);CBSS-224911.1.peg.435 idu(1);Phosphoglycerate_mutase_protein_family
scaffold1|size1664507	fig|6666666.156949.peg.536	peg	scaffold1|size1664507_391941_390451	391941	390451	-	Acetate permease ActP (cation/acetate symporter)	FIG01347644	idu(1);Pyruvate_metabolism_II:_acetyl-CoA,_acetogenesis_from_pyruvate
scaffold1|size1664507	fig|6666666.156949.peg.537	peg	scaffold1|size1664507_392141_391941	392141	391941	-	YhjC	FIG01228408	NA
scaffold1|size1664507	fig|6666666.156949.peg.538	peg	scaffold1|size1664507_392325_393236	392325	393236	+	Glyoxalase family protein	FIG00007915	NA
scaffold1|size1664507	fig|6666666.156949.peg.539	peg	scaffold1|size1664507_393252_393854	393252	393854	+	Carboxylesterase (EC 3.1.1.1)	FIG01225679	NA
scaffold1|size1664507	fig|6666666.156949.peg.540	peg	scaffold1|size1664507_394505_393897	394505	393897	-	Oxygen-insensitive NAD(P)H nitroreductase (EC 1.-.-.-) / Dihydropteridine reductase (EC 1.5.1.34)	FIG00731724	NA
scaffold1|size1664507	fig|6666666.156949.peg.541	peg	scaffold1|size1664507_394635_394973	394635	394973	+	Transcriptional regulator, HxlR family	FIG00906075	NA
scaffold1|size1664507	fig|6666666.156949.peg.542	peg	scaffold1|size1664507_395375_395229	395375	395229	-	hypothetical protein	NA	NA
scaffold1|size1664507	fig|6666666.156949.peg.543	peg	scaffold1|size1664507_395751_395362	395751	395362	-	4-oxalocrotonate tautomerase	FIG01240363	NA
scaffold1|size1664507	fig|6666666.156949.peg.544	peg	scaffold1|size1664507_396116_397450	396116	397450	+	Gluconate permease, Bsu4004 homolog	FIG00009417	idu(1);D-gluconate_and_ketogluconates_metabolism
scaffold1|size1664507	fig|6666666.156949.peg.545	peg	scaffold1|size1664507_397535_397771	397535	397771	+	unknown	NA	NA
scaffold1|size1664507	fig|6666666.156949.peg.546	peg	scaffold1|size1664507_398266_397805	398266	397805	-	FIG01229766: hypothetical protein	FIG01229761	NA
scaffold1|size1664507	fig|6666666.156949.peg.547	peg	scaffold1|size1664507_398365_399261	398365	399261	+	Protein rarD	FIG01057456	NA
scaffold1|size1664507	fig|6666666.156949.peg.548	peg	scaffold1|size1664507_399337_399615	399337	399615	+	FIG01230496: hypothetical protein	FIG01230494	NA
scaffold1|size1664507	fig|6666666.156949.peg.549	peg	scaffold1|size1664507_399612_399962	399612	399962	+	FIG011895: hypothetical protein	FIG00009385	icw(1);CBSS-158878.1.peg.567
scaffold1|size1664507	fig|6666666.156949.peg.550	peg	scaffold1|size1664507_399981_400646	399981	400646	+	FIG013761: LmbE family protein	FIG00009403	isu;CBSS-158878.1.peg.567
scaffold1|size1664507	fig|6666666.156949.peg.551	peg	scaffold1|size1664507_401520_400672	401520	400672	-	RsbR, positive regulator of sigma-B	FIG00001285	idu(5);SigmaB_stress_responce_regulation
scaffold1|size1664507	fig|6666666.156949.peg.552	peg	scaffold1|size1664507_402894_401536	402894	401536	-	Multi antimicrobial extrusion protein (Na(+)/drug antiporter), MATE family of MDR efflux pumps	FIG00000402	idu(1);Multidrug_Resistance_Efflux_Pumps
scaffold1|size1664507	fig|6666666.156949.peg.553	peg	scaffold1|size1664507_403169_403783	403169	403783	+	Diadenylate cyclase spyDAC; Bacterial checkpoint controller DisA with nucleotide-binding domain	FIG00006310	idu(1);Bacterial_checkpoint-control-related_cluster idu(1);Bacterial_checkpoint-control-related_cluster
scaffold1|size1664507	fig|6666666.156949.peg.554	peg	scaffold1|size1664507_404019_405236	404019	405236	+	Macrolide glycosyltransferase (EC 2.4.1.-)	FIG01230003	NA
scaffold1|size1664507	fig|6666666.156949.peg.555	peg	scaffold1|size1664507_405618_406862	405618	406862	+	Gamma-D-glutamyl-meso-diaminopimelate peptidase (EC 3.4.19.11)	FIG00181748	idu(2);Omega_peptidases_(EC_3.4.19.-)
scaffold1|size1664507	fig|6666666.156949.peg.556	peg	scaffold1|size1664507_406955_407545	406955	407545	+	Superoxide dismutase [Cu-Zn] precursor (EC 1.15.1.1)	NA	isu;Oxidative_stress isu;Protection_from_Reactive_Oxygen_Species
scaffold1|size1664507	fig|6666666.156949.peg.557	peg	scaffold1|size1664507_407633_408523	407633	408523	+	Nitric oxide reductase activation protein NorQ	FIG00133744	icw(1);Denitrification icw(1);Denitrifying_reductase_gene_clusters
scaffold1|size1664507	fig|6666666.156949.peg.558	peg	scaffold1|size1664507_408534_410450	408534	410450	+	Nitric oxide reductase activation protein NorD	FIG00133628	isu;Denitrification isu;Denitrifying_reductase_gene_clusters
scaffold1|size1664507	fig|6666666.156949.peg.559	peg	scaffold1|size1664507_410679_413513	410679	413513	+	2-oxoglutarate dehydrogenase E1 component (EC 1.2.4.2)	FIG00000541	icw(1);TCA_Cycle icw(1);Dehydrogenase_complexes
scaffold1|size1664507	fig|6666666.156949.peg.560	peg	scaffold1|size1664507_413529_414782	413529	414782	+	Dihydrolipoamide succinyltransferase component (E2) of 2-oxoglutarate dehydrogenase complex (EC 2.3.1.61)	FIG00127747	isu;TCA_Cycle isu;Dehydrogenase_complexes
scaffold1|size1664507	fig|6666666.156949.peg.561	peg	scaffold1|size1664507_415797_414832	415797	414832	-	Sodium-dependent transporter	FIG01308542	NA
scaffold1|size1664507	fig|6666666.156949.peg.562	peg	scaffold1|size1664507_416016_417353	416016	417353	+	sodium-dependent transporter	FIG01338355	NA
scaffold1|size1664507	fig|6666666.156949.peg.563	peg	scaffold1|size1664507_417991_417389,scaffold1|size1664507_417385_417350	417991	417350	-	Superoxide dismutase [Fe] (EC 1.15.1.1)	FIG00133139	isu;Oxidative_stress isu;Protection_from_Reactive_Oxygen_Species
scaffold1|size1664507	fig|6666666.156949.peg.564	peg	scaffold1|size1664507_420119_418221	420119	418221	-	Squalene--hopene cyclase (EC 5.4.99.17)	FIG00002908	isu;CBSS-320388.3.peg.3759 isu;Hopanes
scaffold1|size1664507	fig|6666666.156949.peg.565	peg	scaffold1|size1664507_421707_420220	421707	420220	-	Aldehyde dehydrogenase (EC 1.2.1.3)	FIG01292786	idu(4);Pyruvate_metabolism_II:_acetyl-CoA,_acetogenesis_from_pyruvate idu(4);Glycerolipid_and_Glycerophospholipid_Metabolism_in_Bacteria idu(4);Methylglyoxal_Metabolism
scaffold1|size1664507	fig|6666666.156949.peg.566	peg	scaffold1|size1664507_421937_422140	421937	422140	+	FIG01230826: hypothetical protein	FIG01230825	NA
scaffold1|size1664507	fig|6666666.156949.peg.567	peg	scaffold1|size1664507_422496_422840	422496	422840	+	CDS_ID OB3216	NA	NA
scaffold1|size1664507	fig|6666666.156949.peg.568	peg	scaffold1|size1664507_423167_422934	423167	422934	-	FIG01232811: hypothetical protein	FIG01232809	NA
scaffold1|size1664507	fig|6666666.156949.peg.569	peg	scaffold1|size1664507_423435_423172	423435	423172	-	YozN	FIG01228522	NA
scaffold1|size1664507	fig|6666666.156949.peg.570	peg	scaffold1|size1664507_423502_423978	423502	423978	+	FIG01228906: hypothetical protein	FIG01228905	NA
scaffold1|size1664507	fig|6666666.156949.peg.571	peg	scaffold1|size1664507_424192_423965	424192	423965	-	FIG01233217: hypothetical protein	FIG01233216	NA
scaffold1|size1664507	fig|6666666.156949.peg.572	peg	scaffold1|size1664507_424270_424602	424270	424602	+	Uncharacterized protein yocL	FIG01231346	NA
scaffold1|size1664507	fig|6666666.156949.peg.573	peg	scaffold1|size1664507_424677_425168	424677	425168	+	YocK	FIG01233109	NA
scaffold1|size1664507	fig|6666666.156949.peg.574	peg	scaffold1|size1664507_425320_425946	425320	425946	+	FMN-dependent NADH-azoreductase	FIG00553659	NA
scaffold1|size1664507	fig|6666666.156949.peg.575	peg	scaffold1|size1664507_425985_426167	425985	426167	+	hypothetical protein	NA	NA
scaffold1|size1664507	fig|6666666.156949.peg.576	peg	scaffold1|size1664507_426433_426263	426433	426263	-	hypothetical protein	NA	NA
scaffold1|size1664507	fig|6666666.156949.peg.577	peg	scaffold1|size1664507_426511_428286	426511	428286	+	ATP-dependent DNA helicase RecQ	FIG00000422	isu;DNA-replication isu;DNA_repair,_bacterial_RecFOR_pathway
scaffold1|size1664507	fig|6666666.156949.peg.578	peg	scaffold1|size1664507_428534_429397	428534	429397	+	Cell wall-binding protein	FIG00615230	NA
scaffold1|size1664507	fig|6666666.156949.peg.579	peg	scaffold1|size1664507_430598_429999	430598	429999	-	putative two-component system response regulator	FIG01124340	NA
scaffold1|size1664507	fig|6666666.156949.peg.580	peg	scaffold1|size1664507_431729_430617	431729	430617	-	sensor histidine kinase	FIG00431356	NA
scaffold1|size1664507	fig|6666666.156949.peg.581	peg	scaffold1|size1664507_432907_431849	432907	431849	-	Fatty-acid desaturase (EC 1.14.99.-)	FIG01236222	NA
scaffold1|size1664507	fig|6666666.156949.peg.582	peg	scaffold1|size1664507_434047_433070	434047	433070	-	Muramoyltetrapeptide carboxypeptidase (EC 3.4.17.13)	FIG00004788	idu(1);Murein_Hydrolases idu(1);Recycling_of_Peptidoglycan_Amino_Acids idu(1);Metallocarboxypeptidases_(EC_3.4.17.-)
scaffold1|size1664507	fig|6666666.156949.peg.583	peg	scaffold1|size1664507_434608_434111	434608	434111	-	unknown	NA	NA
scaffold1|size1664507	fig|6666666.156949.peg.584	peg	scaffold1|size1664507_434722_435561	434722	435561	+	FIG01236399: hypothetical protein	FIG01236398	NA
scaffold1|size1664507	fig|6666666.156949.peg.585	peg	scaffold1|size1664507_435698_436234	435698	436234	+	FIG01234361: hypothetical protein	FIG01234358	NA
scaffold1|size1664507	fig|6666666.156949.peg.586	peg	scaffold1|size1664507_437001_436324	437001	436324	-	Pneumococcal vaccine antigen A homolog	FIG01309443	NA
scaffold1|size1664507	fig|6666666.156949.peg.587	peg	scaffold1|size1664507_437196_437519	437196	437519	+	Transcriptional regulator, ArsR family	FIG00003845	idu(4);CBSS-1085.1.peg.1363
scaffold1|size1664507	fig|6666666.156949.peg.588	peg	scaffold1|size1664507_438091_437546	438091	437546	-	Protein csk22	FIG01230920	NA
scaffold1|size1664507	fig|6666666.156949.peg.589	peg	scaffold1|size1664507_438296_439234	438296	439234	+	Transcriptional regulator, DeoR family	FIG00743946	NA
scaffold1|size1664507	fig|6666666.156949.peg.590	peg	scaffold1|size1664507_439288_439770	439288	439770	+	Transcriptional regulator, AraC family	NA	NA
scaffold1|size1664507	fig|6666666.156949.peg.591	peg	scaffold1|size1664507_439846_440547	439846	440547	+	metallo-beta-lactamase family protein	FIG00882049	NA
scaffold1|size1664507	fig|6666666.156949.peg.592	peg	scaffold1|size1664507_440583_441128	440583	441128	+	Transcriptional regulator, TetR family	NA	NA
scaffold1|size1664507	fig|6666666.156949.peg.593	peg	scaffold1|size1664507_441206_441949	441206	441949	+	N-acetylglutamate synthase (EC 2.3.1.1)	FIG00001206	idu(1);Arginine_Biosynthesis_--_gjo idu(1);Arginine_Biosynthesis_extended
scaffold1|size1664507	fig|6666666.156949.peg.594	peg	scaffold1|size1664507_441970_442689	441970	442689	+	FIG01242766: hypothetical protein	FIG01242765	NA
scaffold1|size1664507	fig|6666666.156949.peg.595	peg	scaffold1|size1664507_442754_443086	442754	443086	+	Protein secretion chaperonin CsaA	FIG00013433	NA
scaffold1|size1664507	fig|6666666.156949.peg.596	peg	scaffold1|size1664507_443173_443304	443173	443304	+	hypothetical protein	NA	NA
scaffold1|size1664507	fig|6666666.156949.peg.597	peg	scaffold1|size1664507_444834_443335	444834	443335	-	Tryptophan 2-monooxygenase (EC 1.13.12.3)	FIG00003525	NA
scaffold1|size1664507	fig|6666666.156949.peg.598	peg	scaffold1|size1664507_444890_445456	444890	445456	+	FIG01239499: hypothetical protein	FIG01239497	NA
scaffold1|size1664507	fig|6666666.156949.peg.599	peg	scaffold1|size1664507_445557_445829	445557	445829	+	Putative toxin component near putative ESAT-related proteins, repetitive / Repetitive hypothetical protein near ESAT cluster, SA0282 homolog	FIG00149320	NA
scaffold1|size1664507	fig|6666666.156949.peg.600	peg	scaffold1|size1664507_447905_446775	447905	446775	-	response regulator aspartate phosphatase	FIG01228496	NA
scaffold1|size1664507	fig|6666666.156949.peg.601	peg	scaffold1|size1664507_449389_449733	449389	449733	+	hypothetical protein	NA	NA
scaffold1|size1664507	fig|6666666.156949.peg.602	peg	scaffold1|size1664507_449786_449923	449786	449923	+	hypothetical protein	NA	NA
scaffold1|size1664507	fig|6666666.156949.peg.603	peg	scaffold1|size1664507_450363_449998	450363	449998	-	FIG01235742: hypothetical protein	FIG01235741	NA
scaffold1|size1664507	fig|6666666.156949.peg.604	peg	scaffold1|size1664507_450454_450642	450454	450642	+	hypothetical protein	NA	NA
scaffold1|size1664507	fig|6666666.156949.peg.605	peg	scaffold1|size1664507_450792_451493	450792	451493	+	hypothetical protein	NA	NA
scaffold1|size1664507	fig|6666666.156949.peg.606	peg	scaffold1|size1664507_451670_451942	451670	451942	+	unknown	NA	NA
scaffold1|size1664507	fig|6666666.156949.peg.607	peg	scaffold1|size1664507_452827_452991	452827	452991	+	hypothetical protein	NA	NA
scaffold1|size1664507	fig|6666666.156949.peg.608	peg	scaffold1|size1664507_453041_453673	453041	453673	+	hypothetical protein	NA	NA
scaffold1|size1664507	fig|6666666.156949.peg.609	peg	scaffold1|size1664507_454214_454453	454214	454453	+	Predicted membrane protein	NA	NA
scaffold1|size1664507	fig|6666666.156949.peg.610	peg	scaffold1|size1664507_454750_454619	454750	454619	-	hypothetical protein	NA	NA
scaffold1|size1664507	fig|6666666.156949.peg.611	peg	scaffold1|size1664507_455084_455725	455084	455725	+	Chain A, Crystal Structure Of A Mesophilic Xylanase A From Bacillus Subtilis 1a1	FIG01504186	NA
scaffold1|size1664507	fig|6666666.156949.peg.612	peg	scaffold1|size1664507_456396_458996	456396	458996	+	Phosphoenolpyruvate synthase (EC 2.7.9.2)	FIG00000789	idu(1);Glycolysis_and_Gluconeogenesis,_including_Archaeal_enzymes idu(1);Glycolysis_and_Gluconeogenesis idu(1);Pyruvate_metabolism_I:_anaplerotic_reactions,_PEP
scaffold1|size1664507	fig|6666666.156949.peg.613	peg	scaffold1|size1664507_459529_459287	459529	459287	-	unknown	NA	NA
scaffold1|size1664507	fig|6666666.156949.peg.614	peg	scaffold1|size1664507_460264_460590	460264	460590	+	YobA	FIG01521547	NA
scaffold1|size1664507	fig|6666666.156949.peg.615	peg	scaffold1|size1664507_461868_461077	461868	461077	-	Beta-lactamase class A	FIG00005710	isu;Beta-lactamase
scaffold1|size1664507	fig|6666666.156949.peg.616	peg	scaffold1|size1664507_461867_462049	461867	462049	+	hypothetical protein	NA	NA
scaffold1|size1664507	fig|6666666.156949.peg.617	peg	scaffold1|size1664507_462223_462855	462223	462855	+	ThiJ/PfpI family protein	FIG00015923	NA
scaffold1|size1664507	fig|6666666.156949.peg.618	peg	scaffold1|size1664507_463119_463550	463119	463550	+	YoaW	FIG01529724	NA
scaffold1|size1664507	fig|6666666.156949.peg.619	peg	scaffold1|size1664507_464609_463731	464609	463731	-	Permease of the drug/metabolite transporter (DMT) superfamily	FIG00846773	idu(11);Queuosine-Archaeosine_Biosynthesis
scaffold1|size1664507	fig|6666666.156949.peg.620	peg	scaffold1|size1664507_464710_465582	464710	465582	+	LysR family transcriptional regulator STM2281	FIG00011906	idu(1);LysR-family_proteins_in_Salmonella_enterica_Typhimurium
scaffold1|size1664507	fig|6666666.156949.peg.621	peg	scaffold1|size1664507_466500_465706	466500	465706	-	membrane protein, putative	FIG00439698	NA
scaffold1|size1664507	fig|6666666.156949.peg.622	peg	scaffold1|size1664507_466865_466629	466865	466629	-	Transcriptional regulator, Cro/CI family	FIG01232116	NA
scaffold1|size1664507	fig|6666666.156949.peg.623	peg	scaffold1|size1664507_467357_466875	467357	466875	-	putative membrane protein	FIG00092051	NA
scaffold1|size1664507	fig|6666666.156949.peg.624	peg	scaffold1|size1664507_467704_468615	467704	468615	+	Vancomycin B-type resistance protein VanW	FIG00003433	isu;Resistance_to_Vancomycin
scaffold1|size1664507	fig|6666666.156949.peg.625	peg	scaffold1|size1664507_468717_468917,scaffold1|size1664507_468917_468967	468717	468967	+	Uncharacterized protein yozF precursor	FIG01334530	NA
scaffold1|size1664507	fig|6666666.156949.peg.626	peg	scaffold1|size1664507_469229_469708	469229	469708	+	GCN5-related N-acetyltransferase	FIG01272034	NA
scaffold1|size1664507	fig|6666666.156949.peg.627	peg	scaffold1|size1664507_469867_470361	469867	470361	+	YoaO	FIG01228124	NA
scaffold1|size1664507	fig|6666666.156949.peg.628	peg	scaffold1|size1664507_470485_471663	470485	471663	+	Oxalate decarboxylase oxdD (EC 4.1.1.2)	FIG01232963	NA
scaffold1|size1664507	fig|6666666.156949.peg.629	peg	scaffold1|size1664507_471879_472184	471879	472184	+	hypothetical protein	NA	NA
scaffold1|size1664507	fig|6666666.156949.peg.630	peg	scaffold1|size1664507_473203_472520	473203	472520	-	FIG01230994: hypothetical protein	FIG01336779	NA
scaffold1|size1664507	fig|6666666.156949.peg.631	peg	scaffold1|size1664507_474497_473460	474497	473460	-	Pectin lyase (EC 4.2.2.10)	FIG00905339	isu;D-Galacturonate_and_D-Glucuronate_Utilization
scaffold1|size1664507	fig|6666666.156949.peg.632	peg	scaffold1|size1664507_474669_475346	474669	475346	+	FIG01237212: hypothetical protein	FIG01237210	NA
scaffold1|size1664507	fig|6666666.156949.peg.633	peg	scaffold1|size1664507_475616_476314	475616	476314	+	Extracellular endoglucanase	FIG01381024	NA
scaffold1|size1664507	fig|6666666.156949.peg.634	peg	scaffold1|size1664507_477802_476351	477802	476351	-	4-hydroxyphenylacetate 3-monooxygenase (EC 1.14.13.3)	FIG00138613	isu;Aromatic_Amin_Catabolism isu;4-Hydroxyphenylacetic_acid_catabolic_pathway
scaffold1|size1664507	fig|6666666.156949.peg.635	peg	scaffold1|size1664507_478129_479814	478129	479814	+	putative methyl-accepting chemotaxis protein YoaH	FIG01231826	NA
scaffold1|size1664507	fig|6666666.156949.peg.636	peg	scaffold1|size1664507_480223_479930	480223	479930	-	YozQ	FIG01235308	NA
scaffold1|size1664507	fig|6666666.156949.peg.637	peg	scaffold1|size1664507_480389_480267	480389	480267	-	hypothetical protein	NA	NA
scaffold1|size1664507	fig|6666666.156949.peg.638	peg	scaffold1|size1664507_480638_480763	480638	480763	+	hypothetical protein	NA	NA
scaffold1|size1664507	fig|6666666.156949.peg.639	peg	scaffold1|size1664507_481057_482076	481057	482076	+	Predicted transcriptional regulator of the myo-inositol catabolic operon	FIG00002272	icw(1);Inositol_catabolism
scaffold1|size1664507	fig|6666666.156949.peg.640	peg	scaffold1|size1664507_482558_483487	482558	483487	+	Inosose dehydratase (EC 4.2.1.44)	FIG00001357	icw(2);Inositol_catabolism
scaffold1|size1664507	fig|6666666.156949.peg.641	peg	scaffold1|size1664507_483505_484671	483505	484671	+	Myo-inositol 2-dehydrogenase (EC 1.1.1.18)	FIG01583289	icw(3);Inositol_catabolism
scaffold1|size1664507	fig|6666666.156949.peg.642	peg	scaffold1|size1664507_484711_486165	484711	486165	+	Major myo-inositol transporter IolT	FIG00080381	idu(4);Inositol_catabolism
scaffold1|size1664507	fig|6666666.156949.peg.643	peg	scaffold1|size1664507_486563_486243	486563	486243	-	YoaF	FIG01245368	NA
scaffold1|size1664507	fig|6666666.156949.peg.644	peg	scaffold1|size1664507_488714_486672	488714	486672	-	Anaerobic dehydrogenases, typically selenocysteine-containing	FIG00041382	idu(1);Anaerobic_respiratory_reductases
scaffold1|size1664507	fig|6666666.156949.peg.645	peg	scaffold1|size1664507_489105_488968	489105	488968	-	hypothetical protein	NA	NA
scaffold1|size1664507	fig|6666666.156949.peg.646	peg	scaffold1|size1664507_489077_490078	489077	490078	+	Hydroxypyruvate reductase (EC 1.1.1.81)	FIG01304624	idu(1);Glycolate,_glyoxylate_interconversions idu(1);Glycerate_metabolism
scaffold1|size1664507	fig|6666666.156949.peg.647	peg	scaffold1|size1664507_490096_491559	490096	491559	+	FIG01232845: hypothetical protein	FIG01232844	NA
scaffold1|size1664507	fig|6666666.156949.peg.648	peg	scaffold1|size1664507_491656_492900	491656	492900	+	alpha-ketoglutarate permease	FIG01378565	NA
scaffold1|size1664507	fig|6666666.156949.peg.649	peg	scaffold1|size1664507_493069_492866	493069	492866	-	hypothetical protein	NA	NA
scaffold1|size1664507	fig|6666666.156949.peg.650	peg	scaffold1|size1664507_493296_493847	493296	493847	+	MarR-family transcriptional regulator	FIG01332748	NA
scaffold1|size1664507	fig|6666666.156949.peg.651	peg	scaffold1|size1664507_493863_494801	493863	494801	+	ABC-type MDR transporter, ATPase component	FIG01503972	NA
scaffold1|size1664507	fig|6666666.156949.peg.652	peg	scaffold1|size1664507_494811_495557	494811	495557	+	Uncharactecterized conserved membrane protein, possible ABC-type MDR permease	FIG01319267	NA
scaffold1|size1664507	fig|6666666.156949.peg.653	peg	scaffold1|size1664507_495551_496543	495551	496543	+	FIG028593: membrane protein	FIG01963607	NA
scaffold1|size1664507	fig|6666666.156949.peg.654	peg	scaffold1|size1664507_497217_496684	497217	496684	-	acetyltransferase, GNAT family	FIG01315364	NA
scaffold1|size1664507	fig|6666666.156949.peg.655	peg	scaffold1|size1664507_498031_497261	498031	497261	-	FIG01238402: hypothetical protein	FIG01238400	NA
scaffold1|size1664507	fig|6666666.156949.peg.656	peg	scaffold1|size1664507_498406_498098	498406	498098	-	FIG01235503: hypothetical protein	FIG01235500	NA
scaffold1|size1664507	fig|6666666.156949.peg.657	peg	scaffold1|size1664507_498557_499273	498557	499273	+	3-oxoacyl-[acyl-carrier protein] reductase (EC 1.1.1.100)	FIG00621114	idu(6);CBSS-246196.1.peg.364 idu(6);Fatty_Acid_Biosynthesis_FASII
scaffold1|size1664507	fig|6666666.156949.peg.658	peg	scaffold1|size1664507_499569_499940	499569	499940	+	replication terminator protein	FIG01236155	NA
scaffold1|size1664507	fig|6666666.156949.peg.659	peg	scaffold1|size1664507_500051_499926	500051	499926	-	hypothetical protein	NA	NA
scaffold1|size1664507	fig|6666666.156949.peg.660	peg	scaffold1|size1664507_500166_500981	500166	500981	+	Pyrroline-5-carboxylate reductase (EC 1.5.1.2)	FIG00133325	idu(1);Proline_Synthesis idu(1);A_Hypothetical_Protein_Related_to_Proline_Metabolism
scaffold1|size1664507	fig|6666666.156949.peg.661	peg	scaffold1|size1664507_500978_502093	500978	502093	+	Glutamate 5-kinase (EC 2.7.2.11) / RNA-binding C-terminal domain PUA	FIG00000351	icw(1);Proline_Synthesis icw(1);Proline_Synthesis
scaffold1|size1664507	fig|6666666.156949.peg.662	peg	scaffold1|size1664507_503046_502144	503046	502144	-	GltC, transcription activator of glutamate synthase operon	FIG00009634	NA
scaffold1|size1664507	fig|6666666.156949.peg.663	peg	scaffold1|size1664507_503193_507755	503193	507755	+	Glutamate synthase [NADPH] large chain (EC 1.4.1.13)	FIG00000539	isu;Glutamine,_Glutamate,_Aspartate_and_Asparagine_Biosynthesis icw(1);Ammonia_assimilation
scaffold1|size1664507	fig|6666666.156949.peg.664	peg	scaffold1|size1664507_507772_509253	507772	509253	+	Glutamate synthase [NADPH] small chain (EC 1.4.1.13)	FIG00007957	icw(1);Glutamine,_Glutamate,_Aspartate_and_Asparagine_Biosynthesis isu;Ammonia_assimilation
scaffold1|size1664507	fig|6666666.156949.peg.665	peg	scaffold1|size1664507_510299_509310	510299	509310	-	Alcohol dehydrogenase (EC 1.1.1.1)	FIG01007502	idu(2);5-FCL-like_protein idu(2);Glycerolipid_and_Glycerophospholipid_Metabolism_in_Bacteria idu(2);Fermentations:_Mixed_acid idu(2);Butanol_Biosynthesis
scaffold1|size1664507	fig|6666666.156949.peg.666	peg	scaffold1|size1664507_510428_511285	510428	511285	+	Transcriptional regulator, LysR family	FIG01304134	NA
scaffold1|size1664507	fig|6666666.156949.peg.667	peg	scaffold1|size1664507_513211_511448	513211	511448	-	Gamma-glutamyltranspeptidase (EC 2.3.2.2)	FIG00005992	idu(1);Utilization_of_glutathione_as_a_sulphur_source idu(1);Poly-gamma-glutamate_biosynthesis idu(1);Glutathione:_Biosynthesis_and_gamma-glutamyl_cycle
scaffold1|size1664507	fig|6666666.156949.peg.668	peg	scaffold1|size1664507_513396_513626	513396	513626	+	DNA binding domain, excisionase family	FIG01311529	NA
scaffold1|size1664507	fig|6666666.156949.peg.669	peg	scaffold1|size1664507_513942_514487	513942	514487	+	site-specific recombinase, phage integrase family	FIG01307911	NA
scaffold1|size1664507	fig|6666666.156949.rna.8	rna	scaffold1|size1664507_514540_514612	514540	514612	+	tRNA-Arg-CCT	NA	NA
scaffold1|size1664507	fig|6666666.156949.peg.670	peg	scaffold1|size1664507_515251_514706	515251	514706	-	YoeB	FIG01241209	NA
scaffold1|size1664507	fig|6666666.156949.peg.671	peg	scaffold1|size1664507_515537_516928	515537	516928	+	Na+ driven multidrug efflux pump	FIG01199987	NA
scaffold1|size1664507	fig|6666666.156949.peg.672	peg	scaffold1|size1664507_517062_518039	517062	518039	+	YoxA	FIG01239959	NA
scaffold1|size1664507	fig|6666666.156949.peg.673	peg	scaffold1|size1664507_518073_519548	518073	519548	+	D-alanyl-D-alanine carboxypeptidase (EC 3.4.16.4)	FIG00561498	idu(5);Murein_Hydrolases idu(5);Peptidoglycan_Biosynthesis idu(5);CBSS-84588.1.peg.1247 idu(5);Metallocarboxypeptidases_(EC_3.4.17.-)
scaffold1|size1664507	fig|6666666.156949.peg.674	peg	scaffold1|size1664507_522773_527710	522773	527710	+	FIG01233961: hypothetical protein	FIG01233959	NA
scaffold1|size1664507	fig|6666666.156949.peg.675	peg	scaffold1|size1664507_527739_531557	527739	531557	+	FIG01239039: hypothetical protein	FIG01239036	NA
scaffold1|size1664507	fig|6666666.156949.peg.676	peg	scaffold1|size1664507_531665_532057	531665	532057	+	YngL	FIG01228982	NA
scaffold1|size1664507	fig|6666666.156949.peg.677	peg	scaffold1|size1664507_532193_533725	532193	533725	+	COG1649 predicted glycoside hydrolase	FIG01317966	NA
scaffold1|size1664507	fig|6666666.156949.peg.678	peg	scaffold1|size1664507_533867_534007	533867	534007	+	FIG01234168: hypothetical protein	FIG01234167	NA
scaffold1|size1664507	fig|6666666.156949.peg.679	peg	scaffold1|size1664507_534098_535240	534098	535240	+	Isovaleryl-CoA dehydrogenase (EC 1.3.8.4)	FIG00138712	icw(3);HMG_CoA_Synthesis icw(2);Leucine_Degradation_and_HMG-CoA_Metabolism
scaffold1|size1664507	fig|6666666.156949.peg.680	peg	scaffold1|size1664507_535284_536933	535284	536933	+	Long-chain-fatty-acid--CoA ligase (EC 6.2.1.3) / Acetoacetyl-CoA synthetase [leucine] (EC 6.2.1.16)	FIG01304894	idu(2);n-Phenylalkanoic_acid_degradation idu(2);Fatty_acid_metabolism_cluster idu(2);Biotin_biosynthesis icw(4);HMG_CoA_Synthesis icw(6);Leucine_Degradation_and_HMG-CoA_Metabolism
scaffold1|size1664507	fig|6666666.156949.peg.681	peg	scaffold1|size1664507_536943_538277	536943	538277	+	Biotin carboxylase of methylcrotonyl-CoA carboxylase (EC 6.3.4.14)	FIG00006800	icw(3);HMG_CoA_Synthesis icw(3);Leucine_Degradation_and_HMG-CoA_Metabolism
scaffold1|size1664507	fig|6666666.156949.peg.682	peg	scaffold1|size1664507_538292_538513	538292	538513	+	Biotin carboxyl carrier protein of methylcrotonyl-CoA carboxylase	FIG00007035	icw(6);HMG_CoA_Synthesis icw(5);Leucine_Degradation_and_HMG-CoA_Metabolism
scaffold1|size1664507	fig|6666666.156949.peg.683	peg	scaffold1|size1664507_538528_539427	538528	539427	+	Hydroxymethylglutaryl-CoA lyase (EC 4.1.3.4)	FIG00000963	isu;HMG_CoA_Synthesis isu;Leucine_Degradation_and_HMG-CoA_Metabolism
scaffold1|size1664507	fig|6666666.156949.peg.684	peg	scaffold1|size1664507_539448_540230	539448	540230	+	Methylglutaconyl-CoA hydratase (EC 4.2.1.18)	FIG00138403	idu(1);Benzoate_transport_and_degradation_cluster icw(1);HMG_CoA_Synthesis icw(1);Leucine_Degradation_and_HMG-CoA_Metabolism
scaffold1|size1664507	fig|6666666.156949.peg.685	peg	scaffold1|size1664507_540247_541776	540247	541776	+	Methylcrotonyl-CoA carboxylase carboxyl transferase subunit (EC 6.4.1.4)	FIG00138249	isu;Serine-glyoxylate_cycle icw(2);HMG_CoA_Synthesis icw(2);Leucine_Degradation_and_HMG-CoA_Metabolism
scaffold1|size1664507	fig|6666666.156949.peg.686	peg	scaffold1|size1664507_541945_543144	541945	543144	+	3'-to-5' oligoribonuclease B, Bacillus type	FIG00017465	isu;RNA_processing_and_degradation,_bacterial
scaffold1|size1664507	fig|6666666.156949.peg.687	peg	scaffold1|size1664507_543789_543193	543789	543193	-	FIG139438: lipoprotein B	FIG00060285	idu(1);Stationary_phase_repair_cluster
scaffold1|size1664507	fig|6666666.156949.peg.688	peg	scaffold1|size1664507_544755_543862	544755	543862	-	UTP--glucose-1-phosphate uridylyltransferase (EC 2.7.7.9)	FIG00000108	idu(2);Ribosome_post-transcriptional_modification_and_chromosomal_segregation_cluster
scaffold1|size1664507	fig|6666666.156949.peg.689	peg	scaffold1|size1664507_545208_544762	545208	544762	-	YngA	FIG01430859	NA
scaffold1|size1664507	fig|6666666.156949.peg.690	peg	scaffold1|size1664507_545885_547432	545885	547432	+	Endo-1,4-beta-xylanase A precursor (EC 3.2.1.8)	FIG00475203	isu;D-Galacturonate_and_D-Glucuronate_Utilization isu;Xylose_utilization
scaffold1|size1664507	fig|6666666.156949.peg.691	peg	scaffold1|size1664507_547563_548831	547563	548831	+	YnfF	FIG01234770	NA
scaffold1|size1664507	fig|6666666.156949.peg.692	peg	scaffold1|size1664507_549361_549098	549361	549098	-	hypothetical protein	NA	NA
scaffold1|size1664507	fig|6666666.156949.peg.693	peg	scaffold1|size1664507_550935_549436	550935	549436	-	FIG01233907: hypothetical protein	FIG01233903	NA
scaffold1|size1664507	fig|6666666.156949.peg.694	peg	scaffold1|size1664507_552635_551238	552635	551238	-	Amino-acid carrier protein AlsT	FIG01317592	NA
scaffold1|size1664507	fig|6666666.156949.peg.695	peg	scaffold1|size1664507_552906_552793	552906	552793	-	hypothetical protein	NA	NA
scaffold1|size1664507	fig|6666666.156949.peg.696	peg	scaffold1|size1664507_553145_553498	553145	553498	+	unknown	NA	NA
scaffold1|size1664507	fig|6666666.156949.peg.697	peg	scaffold1|size1664507_553524_553649	553524	553649	+	hypothetical protein	NA	NA
scaffold1|size1664507	fig|6666666.156949.peg.698	peg	scaffold1|size1664507_556116_553696	556116	553696	-	Topoisomerase IV subunit A (EC 5.99.1.-)	FIG00000425	icw(1);DNA_topoisomerases,_Type_II,_ATP-dependent icw(1);Resistance_to_fluoroquinolones
scaffold1|size1664507	fig|6666666.156949.peg.699	peg	scaffold1|size1664507_558087_556120	558087	556120	-	Topoisomerase IV subunit B (EC 5.99.1.-)	FIG00000439	isu;CBSS-342610.3.peg.1794 isu;DNA_topoisomerases,_Type_II,_ATP-dependent isu;Resistance_to_fluoroquinolones
scaffold1|size1664507	fig|6666666.156949.peg.700	peg	scaffold1|size1664507_558275_558415	558275	558415	+	hypothetical protein	NA	NA
scaffold1|size1664507	fig|6666666.156949.peg.701	peg	scaffold1|size1664507_558893_558486	558893	558486	-	Succinyl-CoA synthetase, alpha subunit-related enzymes	FIG00002678	isu;CBSS-83333.1.peg.946
scaffold1|size1664507	fig|6666666.156949.peg.702	peg	scaffold1|size1664507_559063_559644	559063	559644	+	Acyl-phosphate:glycerol-3-phosphate O-acyltransferase PlsY	FIG00000459	isu;Glycerolipid_and_Glycerophospholipid_Metabolism_in_Bacteria
scaffold1|size1664507	fig|6666666.156949.peg.703	peg	scaffold1|size1664507_559732_560019	559732	560019	+	FIG01226527: hypothetical protein	FIG01226524	NA
scaffold1|size1664507	fig|6666666.156949.peg.704	peg	scaffold1|size1664507_560349_560050	560349	560050	-	FIG01227614: hypothetical protein	FIG00774815	NA
scaffold1|size1664507	fig|6666666.156949.peg.705	peg	scaffold1|size1664507_560781_560365	560781	560365	-	4-hydroxybenzoyl-CoA thioesterase family active site	FIG00002515	idu(1);Ton_and_Tol_transport_systems
scaffold1|size1664507	fig|6666666.156949.peg.706	peg	scaffold1|size1664507_561117_560866	561117	560866	-	Thioredoxin related protein	FIG01227608	NA
scaffold1|size1664507	fig|6666666.156949.peg.707	peg	scaffold1|size1664507_561300_561154	561300	561154	-	hypothetical protein	NA	NA
scaffold1|size1664507	fig|6666666.156949.peg.708	peg	scaffold1|size1664507_561556_561365	561556	561365	-	FIG01225314: hypothetical protein	FIG01225312	NA
scaffold1|size1664507	fig|6666666.156949.peg.709	peg	scaffold1|size1664507_562083_561571	562083	561571	-	Thiol:disulfide oxidoreductase related to ResA	FIG00618007	idu(1);Biogenesis_of_c-type_cytochromes idu(1);CBSS-196164.1.peg.461
scaffold1|size1664507	fig|6666666.156949.peg.710	peg	scaffold1|size1664507_564884_562155	564884	562155	-	Aconitate hydratase (EC 4.2.1.3) @ 2-methylisocitrate dehydratase (EC 4.2.1.99)	FIG00138200	isu;TCA_Cycle isu;Glyoxylate_bypass isu;Methylcitrate_cycle isu;Serine-glyoxylate_cycle
scaffold1|size1664507	fig|6666666.156949.peg.711	peg	scaffold1|size1664507_565094_565258	565094	565258	+	Small, acid-soluble spore protein O	FIG00010088	NA
scaffold1|size1664507	fig|6666666.156949.peg.712	peg	scaffold1|size1664507_565290_565436	565290	565436	+	Small, acid-soluble spore protein P	FIG01964506	NA
scaffold1|size1664507	fig|6666666.156949.peg.713	peg	scaffold1|size1664507_565534_565908	565534	565908	+	Spore coat protein M	FIG00012203	NA
scaffold1|size1664507	fig|6666666.156949.peg.714	peg	scaffold1|size1664507_566143_566571	566143	566571	+	alternate gene name: yoxJ	FIG01225813	NA
scaffold1|size1664507	fig|6666666.156949.peg.715	peg	scaffold1|size1664507_567084_566602	567084	566602	-	FIG01230056: hypothetical protein	FIG01230054	NA
scaffold1|size1664507	fig|6666666.156949.peg.716	peg	scaffold1|size1664507_567534_567172	567534	567172	-	Chemotaxis regulator - transmits chemoreceptor signals to flagelllar motor components CheY	FIG00000426	idu(1);Flagellar_motility idu(1);Two-component_regulatory_systems_in_Campylobacter idu(1);Bacterial_Chemotaxis
scaffold1|size1664507	fig|6666666.156949.peg.717	peg	scaffold1|size1664507_568330_567623	568330	567623	-	Cytochrome c-type biogenesis protein CcdA (DsbD analog)	FIG00133238	isu;Biogenesis_of_c-type_cytochromes isu;CBSS-196164.1.peg.461 isu;Periplasmic_disulfide_interchange isu;Sulfur_oxidation
scaffold1|size1664507	fig|6666666.156949.peg.718	peg	scaffold1|size1664507_568532_568723	568532	568723	+	unknown	NA	NA
scaffold1|size1664507	fig|6666666.156949.peg.719	peg	scaffold1|size1664507_569015_568797	569015	568797	-	UPF0154 membrane protein YoxG	FIG01108282	NA
scaffold1|size1664507	fig|6666666.156949.peg.720	peg	scaffold1|size1664507_569547_569101	569547	569101	-	alternate gene name: yoxF	FIG01311385	NA
scaffold1|size1664507	fig|6666666.156949.peg.721	peg	scaffold1|size1664507_571703_569700	571703	569700	-	Transketolase (EC 2.2.1.1)	NA	isu;Pentose_phosphate_pathway isu;Calvin-Benson_cycle
scaffold1|size1664507	fig|6666666.156949.peg.722	peg	scaffold1|size1664507_572105_571872	572105	571872	-	FIG01227325: hypothetical protein	FIG01227324	NA
scaffold1|size1664507	fig|6666666.156949.peg.723	peg	scaffold1|size1664507_572822_572169	572822	572169	-	site-specific recombinase, resolvase family	FIG01342648	NA
scaffold1|size1664507	fig|6666666.156949.peg.724	peg	scaffold1|size1664507_573152_572841	573152	572841	-	ABC transport protein, sugar-binding component yneA	FIG01331701	NA
scaffold1|size1664507	fig|6666666.156949.peg.725	peg	scaffold1|size1664507_573308_573925	573308	573925	+	SOS-response repressor and protease LexA (EC 3.4.21.88)	FIG00000510	isu;DNA_repair,_bacterial isu;DNA_repair,_bacterial_UmuCD_system
scaffold1|size1664507	fig|6666666.156949.peg.726	peg	scaffold1|size1664507_574897_574463	574897	574463	-	Fosfomycin resistance protein FosB	FIG00014222	isu;Fosfomycin_resistance
scaffold1|size1664507	fig|6666666.156949.peg.727	peg	scaffold1|size1664507_575045_574923	575045	574923	-	hypothetical protein	NA	NA
scaffold1|size1664507	fig|6666666.156949.peg.728	peg	scaffold1|size1664507_575106_575555	575106	575555	+	FIG01228874: hypothetical protein	FIG01449731	NA
scaffold1|size1664507	fig|6666666.156949.peg.729	peg	scaffold1|size1664507_576397_576344,scaffold1|size1664507_576340_575582	576397	575582	-	YndL	FIG01243433	NA
scaffold1|size1664507	fig|6666666.156949.peg.730	peg	scaffold1|size1664507_576932_576564	576932	576564	-	FIG01231769: hypothetical protein	FIG01231767	NA
scaffold1|size1664507	fig|6666666.156949.peg.731	peg	scaffold1|size1664507_578608_576968	578608	576968	-	Arginine/ornithine antiporter ArcD	FIG00001166	idu(4);Arginine_and_Ornithine_Degradation idu(4);Arginine_Deiminase_Pathway idu(4);Polyamine_Metabolism
scaffold1|size1664507	fig|6666666.156949.peg.732	peg	scaffold1|size1664507_578757_578605	578757	578605	-	FIG01244666: hypothetical protein	FIG01244664	NA
scaffold1|size1664507	fig|6666666.156949.peg.733	peg	scaffold1|size1664507_578857_578982	578857	578982	+	hypothetical protein	NA	NA
scaffold1|size1664507	fig|6666666.156949.peg.734	peg	scaffold1|size1664507_579020_579139	579020	579139	+	hypothetical protein	NA	NA
scaffold1|size1664507	fig|6666666.156949.peg.735	peg	scaffold1|size1664507_580033_579227	580033	579227	-	FIG01232947: hypothetical protein	FIG01232946	NA
scaffold1|size1664507	fig|6666666.156949.peg.736	peg	scaffold1|size1664507_581374_580160	581374	580160	-	Uncharacterized spore germination protein YndF	FIG01955930	isu;Spore_germination
scaffold1|size1664507	fig|6666666.156949.peg.737	peg	scaffold1|size1664507_582455_581364	582455	581364	-	Uncharacterized spore germination protein YndE	FIG00142939	icw(1);Spore_germination
scaffold1|size1664507	fig|6666666.156949.peg.738	peg	scaffold1|size1664507_584044_582485	584044	582485	-	Uncharacterized spore germination protein YndD	FIG01955956	icw(2);Spore_germination
scaffold1|size1664507	fig|6666666.156949.peg.739	peg	scaffold1|size1664507_584529_584341	584529	584341	-	FIG01228440: hypothetical protein	FIG01322935	NA
scaffold1|size1664507	fig|6666666.156949.peg.740	peg	scaffold1|size1664507_584689_584567	584689	584567	-	hypothetical protein	NA	NA
scaffold1|size1664507	fig|6666666.156949.peg.741	peg	scaffold1|size1664507_584838_585272	584838	585272	+	FIG01235532: hypothetical protein	FIG01574691	NA
scaffold1|size1664507	fig|6666666.156949.peg.742	peg	scaffold1|size1664507_585734_585336	585734	585336	-	FIG01235259: hypothetical protein	FIG01812803	NA
scaffold1|size1664507	fig|6666666.156949.peg.743	peg	scaffold1|size1664507_585910_585734	585910	585734	-	hypothetical protein	NA	NA
scaffold1|size1664507	fig|6666666.156949.peg.744	peg	scaffold1|size1664507_585989_586177	585989	586177	+	Twin-arginine translocation protein TatAd	FIG01337951	idu(1);Twin-arginine_translocation_system
scaffold1|size1664507	fig|6666666.156949.peg.745	peg	scaffold1|size1664507_586230_586247,scaffold1|size1664507_586251_586577	586230	586577	+	Uncharacterized protein ynzH	FIG01653814	NA
scaffold1|size1664507	fig|6666666.156949.peg.746	peg	scaffold1|size1664507_587343_588065	587343	588065	+	FIG01239770: hypothetical protein	FIG01239766	NA
scaffold1|size1664507	fig|6666666.156949.peg.747	peg	scaffold1|size1664507_589353_588514	589353	588514	-	Thymidylate synthase (EC 2.1.1.45)	FIG00000398	isu;pyrimidine_conversions isu;Folate_Biosynthesis
scaffold1|size1664507	fig|6666666.156949.peg.748	peg	scaffold1|size1664507_589793_589629	589793	589629	-	hypothetical protein	FIG01402705	NA
scaffold1|size1664507	fig|6666666.156949.peg.749	peg	scaffold1|size1664507_589952_589794	589952	589794	-	hypothetical protein	NA	NA
scaffold1|size1664507	fig|6666666.156949.peg.750	peg	scaffold1|size1664507_590189_590449	590189	590449	+	Spore coat protein C	FIG01344595	NA
scaffold1|size1664507	fig|6666666.156949.peg.751	peg	scaffold1|size1664507_591199_590765	591199	590765	-	Deoxyuridine 5'-triphosphate nucleotidohydrolase (EC 3.6.1.23)	FIG00000388	isu;Housecleaning_nucleoside_triphosphate_pyrophosphatases isu;Nudix_proteins_(nucleoside_triphosphate_hydrolases)
scaffold1|size1664507	fig|6666666.156949.peg.752	peg	scaffold1|size1664507_591690_591229	591690	591229	-	FIG01245112: hypothetical protein	FIG01245110	NA
scaffold1|size1664507	fig|6666666.156949.peg.753	peg	scaffold1|size1664507_592119_592544	592119	592544	+	hypothetical protein	NA	NA
scaffold1|size1664507	fig|6666666.156949.peg.754	peg	scaffold1|size1664507_592975_594159	592975	594159	+	Alanine racemase (EC 5.1.1.1)	FIG00001642	idu(1);Pyruvate_Alanine_Serine_Interconversions idu(1);Alanine_biosynthesis
scaffold1|size1664507	fig|6666666.156949.peg.755	peg	scaffold1|size1664507_595634_594261	595634	594261	-	Major myo-inositol transporter IolT	FIG00080381	idu(4);Inositol_catabolism
scaffold1|size1664507	fig|6666666.156949.peg.756	peg	scaffold1|size1664507_596089_596364	596089	596364	+	Phage-encoded chromosome degrading nuclease YokF	FIG00018543	NA
scaffold1|size1664507	fig|6666666.156949.peg.757	peg	scaffold1|size1664507_598433_596934	598433	596934	-	Xylulose kinase (EC 2.7.1.17)	FIG00000793	icw(1);Xylose_utilization
scaffold1|size1664507	fig|6666666.156949.peg.758	peg	scaffold1|size1664507_599921_598584	599921	598584	-	Xylose isomerase (EC 5.3.1.5)	FIG00019456	isu;Xylose_utilization
scaffold1|size1664507	fig|6666666.156949.peg.759	peg	scaffold1|size1664507_600154_601317	600154	601317	+	Xylose-responsive transcription regulator, ROK family	FIG00092279	icw(3);Xylose_utilization
scaffold1|size1664507	fig|6666666.156949.peg.760	peg	scaffold1|size1664507_603056_601455	603056	601455	-	Beta-xylosidase (EC 3.2.1.37)	FIG00003086	icw(4);Xylose_utilization
scaffold1|size1664507	fig|6666666.156949.peg.761	peg	scaffold1|size1664507_604478_603087	604478	603087	-	Xyloside transporter XynT	FIG00079740	icw(1);Xylose_utilization
scaffold1|size1664507	fig|6666666.156949.peg.762	peg	scaffold1|size1664507_605812_605342	605812	605342	-	Phosphoribosylanthranilate isomerase like (EC 5.3.1.24)	NA	NA
scaffold1|size1664507	fig|6666666.156949.peg.763	peg	scaffold1|size1664507_606550_606275	606550	606275	-	unknown	NA	NA
scaffold1|size1664507	fig|6666666.156949.peg.764	peg	scaffold1|size1664507_606889_606593	606889	606593	-	ynaF	NA	NA
scaffold1|size1664507	fig|6666666.156949.peg.765	peg	scaffold1|size1664507_607697_607056	607697	607056	-	hypothetical protein	NA	NA
scaffold1|size1664507	fig|6666666.156949.peg.766	peg	scaffold1|size1664507_608770_608258	608770	608258	-	PhnO protein	FIG00004587	NA
scaffold1|size1664507	fig|6666666.156949.peg.767	peg	scaffold1|size1664507_609627_609094	609627	609094	-	Uncharacterized protein ynaB	FIG01354768	NA
scaffold1|size1664507	fig|6666666.156949.peg.768	peg	scaffold1|size1664507_609963_609709	609963	609709	-	YefM protein (antitoxin to YoeB)	FIG00006338	isu;Toxin-antitoxin_replicon_stabilization_systems
scaffold1|size1664507	fig|6666666.156949.peg.769	peg	scaffold1|size1664507_611167_610094	611167	610094	-	YNZF protein	NA	NA
scaffold1|size1664507	fig|6666666.156949.peg.770	peg	scaffold1|size1664507_611904_611416	611904	611416	-	hypothetical protein	NA	NA
scaffold1|size1664507	fig|6666666.156949.peg.771	peg	scaffold1|size1664507_614098_612764	614098	612764	-	Glutamine synthetase type I (EC 6.3.1.2)	FIG00134889	isu;Glutamine,_Glutamate,_Aspartate_and_Asparagine_Biosynthesis isu;Peptidoglycan_Biosynthesis isu;Ammonia_assimilation isu;Glutamine_synthetases
scaffold1|size1664507	fig|6666666.156949.peg.772	peg	scaffold1|size1664507_614564_614157	614564	614157	-	Transcriptional regulator, MerR family	FIG00003460	isu;Cobalt-zinc-cadmium_resistance
scaffold1|size1664507	fig|6666666.156949.peg.773	peg	scaffold1|size1664507_615939_614674	615939	614674	-	Aluminum resistance protein	FIG00774347	NA
scaffold1|size1664507	fig|6666666.156949.peg.774	peg	scaffold1|size1664507_617132_616233,scaffold1|size1664507_616231_616127	617132	616127	-	GTP-binding protein HflX	FIG00000304	isu;Hfl_operon isu;Universal_GTPases
scaffold1|size1664507	fig|6666666.156949.peg.775	peg	scaffold1|size1664507_618320_617352	618320	617352	-	Stage V sporulation protein whose disruption leads to the production of immature spores (SpoVK)	FIG00015036	isu;Sporulation_gene_orphans
scaffold1|size1664507	fig|6666666.156949.peg.776	peg	scaffold1|size1664507_618473_618351	618473	618351	-	hypothetical protein	NA	NA
scaffold1|size1664507	fig|6666666.156949.peg.777	peg	scaffold1|size1664507_618472_618618	618472	618618	+	FIG01233957: hypothetical protein	FIG01414952	NA
scaffold1|size1664507	fig|6666666.156949.peg.778	peg	scaffold1|size1664507_618953_619720	618953	619720	+	N-acetylmuramoyl-L-alanine amidase (EC 3.5.1.28)	FIG00001385	idu(3);Murein_Hydrolases idu(3);Zinc_regulated_enzymes idu(3);Recycling_of_Peptidoglycan_Amino_Acids
scaffold1|size1664507	fig|6666666.156949.peg.779	peg	scaffold1|size1664507_620404_619784	620404	619784	-	hypothetical protein	NA	NA
scaffold1|size1664507	fig|6666666.156949.peg.780	peg	scaffold1|size1664507_621443_620454	621443	620454	-	Ribonucleotide reductase of class Ib (aerobic), beta subunit (EC 1.17.4.1)	FIG00000960	icw(2);Ribonucleotide_reduction
scaffold1|size1664507	fig|6666666.156949.peg.781	peg	scaffold1|size1664507_623563_621461	623563	621461	-	Ribonucleotide reductase of class Ib (aerobic), alpha subunit (EC 1.17.4.1)	FIG00001069	idu(1);Ribonucleotide_reduction
scaffold1|size1664507	fig|6666666.156949.peg.782	peg	scaffold1|size1664507_623915_623523	623915	623523	-	Ribonucleotide reduction protein NrdI	FIG00001039	icw(1);Ribonucleotide_reduction
scaffold1|size1664507	fig|6666666.156949.peg.783	peg	scaffold1|size1664507_624439_624158	624439	624158	-	unknown	NA	NA
scaffold1|size1664507	fig|6666666.156949.peg.784	peg	scaffold1|size1664507_624742_624470	624742	624470	-	Uncharacterized protein ymzC precursor	FIG01234006	NA
scaffold1|size1664507	fig|6666666.156949.peg.785	peg	scaffold1|size1664507_625159_624938	625159	624938	-	RNA-binding protein Hfq	FIG00000583	isu;Hfl_operon isu;Polyadenylation_bacterial
scaffold1|size1664507	fig|6666666.156949.peg.786	peg	scaffold1|size1664507_626143_625199	626143	625199	-	tRNA dimethylallyltransferase (EC 2.5.1.75)	FIG00000196	isu;tRNA_modification_Bacteria isu;tRNA_processing
scaffold1|size1664507	fig|6666666.156949.peg.787	peg	scaffold1|size1664507_626647_626243	626647	626243	-	unknown	NA	NA
scaffold1|size1664507	fig|6666666.156949.peg.788	peg	scaffold1|size1664507_626745_626990	626745	626990	+	DnaJ-class molecular chaperone CbpA	FIG00027226	isu;Protein_chaperones
scaffold1|size1664507	fig|6666666.156949.peg.789	peg	scaffold1|size1664507_627185_627442	627185	627442	+	Multidrug resistance protein EbrA	FIG01344576	NA
scaffold1|size1664507	fig|6666666.156949.peg.790	peg	scaffold1|size1664507_627456_627809	627456	627809	+	Multidrug resistance protein EbrB	FIG01311023	NA
scaffold1|size1664507	fig|6666666.156949.peg.791	peg	scaffold1|size1664507_628275_627823	628275	627823	-	YMAD protein	FIG01343950	NA
scaffold1|size1664507	fig|6666666.156949.peg.792	peg	scaffold1|size1664507_629052_628345	629052	628345	-	phage-related protein YmaC	FIG01237515	NA
scaffold1|size1664507	fig|6666666.156949.peg.793	peg	scaffold1|size1664507_629565_629332	629565	629332	-	FIG01239721: hypothetical protein	FIG01239720	NA
scaffold1|size1664507	fig|6666666.156949.peg.794	peg	scaffold1|size1664507_629904_631118	629904	631118	+	alkaline serine protease	FIG01368116	NA
scaffold1|size1664507	fig|6666666.156949.peg.795	peg	scaffold1|size1664507_631189_631070	631189	631070	-	hypothetical protein	NA	NA
scaffold1|size1664507	fig|6666666.156949.peg.796	peg	scaffold1|size1664507_631365_632054	631365	632054	+	metallo-beta-lactamase family protein	FIG00882049	NA
scaffold1|size1664507	fig|6666666.156949.peg.797	peg	scaffold1|size1664507_632133_632489	632133	632489	+	FIG01239751: hypothetical protein	FIG01239749	NA
scaffold1|size1664507	fig|6666666.156949.peg.798	peg	scaffold1|size1664507_632719_633936	632719	633936	+	putative cytochrome P450 hydroxylase	FIG00032437	idu(3);Nitric_oxide_synthase
scaffold1|size1664507	fig|6666666.156949.peg.799	peg	scaffold1|size1664507_641612_633981	641612	633981	-	3-oxoacyl-[acyl-carrier-protein] synthase, KASII (EC 2.3.1.179)	FIG01959124	NA
scaffold1|size1664507	fig|6666666.156949.peg.800	peg	scaffold1|size1664507_658171_641627	658171	641627	-	Malonyl CoA-acyl carrier protein transacylase (EC 2.3.1.39)	FIG00000319	idu(4);Fatty_Acid_Biosynthesis_FASII
scaffold1|size1664507	fig|6666666.156949.peg.801	peg	scaffold1|size1664507_670961_658161	670961	658161	-	polyketide synthase	NA	NA
scaffold1|size1664507	fig|6666666.156949.peg.802	peg	scaffold1|size1664507_684575_670977	684575	670977	-	polyketide synthase of type I	FIG01290002	NA
scaffold1|size1664507	fig|6666666.156949.peg.803	peg	scaffold1|size1664507_699699_684577	699699	684577	-	polyketide synthase of type I	NA	NA
scaffold1|size1664507	fig|6666666.156949.peg.804	peg	scaffold1|size1664507_700492_699743	700492	699743	-	Enoyl-CoA hydratase (EC 4.2.1.17)	FIG00033206	idu(3);n-Phenylalkanoic_acid_degradation idu(3);Polyhydroxybutyrate_metabolism idu(3);Isoleucine_degradation idu(3);Fatty_acid_metabolism_cluster idu(3);Butyrate_metabolism_cluster idu(3);Lysine_fermentation idu(3);Butanol_Biosynthesis idu(3);Acetyl-CoA_fermentation_to_Butyrate idu(3);Valine_degradation
scaffold1|size1664507	fig|6666666.156949.peg.805	peg	scaffold1|size1664507_701294_700524	701294	700524	-	Methylglutaconyl-CoA hydratase (EC 4.2.1.18)	FIG00138403	idu(1);Benzoate_transport_and_degradation_cluster idu(1);HMG_CoA_Synthesis idu(1);Leucine_Degradation_and_HMG-CoA_Metabolism
scaffold1|size1664507	fig|6666666.156949.peg.806	peg	scaffold1|size1664507_702553_701291	702553	701291	-	Hydroxymethylglutaryl-CoA synthase (EC 2.3.3.10)	FIG00135993	isu;Isoprenoid_Biosynthesis isu;Ketoisovalerate_oxidoreductase icw(1);Leucine_Degradation_and_HMG-CoA_Metabolism
scaffold1|size1664507	fig|6666666.156949.peg.807	peg	scaffold1|size1664507_703771_702554	703771	702554	-	3-oxoacyl-[acyl-carrier-protein] synthase, KASII (EC 2.3.1.179)	FIG00956174	NA
scaffold1|size1664507	fig|6666666.156949.peg.808	peg	scaffold1|size1664507_704027_703779	704027	703779	-	Acyl carrier protein	FIG00002328	idu(1);Fatty_Acid_Biosynthesis_FASII idu(1);Glycerolipid_and_Glycerophospholipid_Metabolism_in_Bacteria
scaffold1|size1664507	fig|6666666.156949.peg.809	peg	scaffold1|size1664507_706392_704089	706392	704089	-	Malonyl CoA-acyl carrier protein transacylase (EC 2.3.1.39); Enoyl-[acyl-carrier-protein] reductase [FMN] (EC 1.3.1.9)	FIG01299705	icw(3);Fatty_Acid_Biosynthesis_FASII icw(3);Fatty_Acid_Biosynthesis_FASII
scaffold1|size1664507	fig|6666666.156949.peg.810	peg	scaffold1|size1664507_707363_706389	707363	706389	-	Malonyl CoA-acyl carrier protein transacylase (EC 2.3.1.39)	FIG00000319	icw(3);Fatty_Acid_Biosynthesis_FASII
scaffold1|size1664507	fig|6666666.156949.peg.811	peg	scaffold1|size1664507_707417_707545	707417	707545	+	hypothetical protein	NA	NA
scaffold1|size1664507	fig|6666666.156949.peg.812	peg	scaffold1|size1664507_708732_707866	708732	707866	-	Malonyl CoA-acyl carrier protein transacylase (EC 2.3.1.39)	FIG00000319	icw(3);Fatty_Acid_Biosynthesis_FASII
scaffold1|size1664507	fig|6666666.156949.peg.813	peg	scaffold1|size1664507_709783_709106	709783	709106	-	beta-lactamase domain protein	FIG01226516	NA
scaffold1|size1664507	fig|6666666.156949.peg.814	peg	scaffold1|size1664507_710590_709973	710590	709973	-	FIG01231475: hypothetical protein	FIG01231474	NA
scaffold1|size1664507	fig|6666666.156949.peg.815	peg	scaffold1|size1664507_710711_711268	710711	711268	+	putative membrane protein	FIG00092051	NA
scaffold1|size1664507	fig|6666666.156949.peg.816	peg	scaffold1|size1664507_711393_711878	711393	711878	+	FIG01234101: hypothetical protein	FIG01234100	NA
scaffold1|size1664507	fig|6666666.156949.peg.817	peg	scaffold1|size1664507_714165_712276	714165	712276	-	DNA mismatch repair protein MutL	FIG00000380	icw(1);DNA_repair,_bacterial_MutL-MutS_system
scaffold1|size1664507	fig|6666666.156949.peg.818	peg	scaffold1|size1664507_716751_714175	716751	714175	-	DNA mismatch repair protein MutS	FIG00000356	isu;DNA_repair_system_including_RecA,_MutS_and_a_hypothetical_protein isu;DNA_repair,_bacterial_MutL-MutS_system
scaffold1|size1664507	fig|6666666.156949.peg.819	peg	scaffold1|size1664507_717429_716884	717429	716884	-	Outer spore coat protein E	FIG00006437	isu;Exosporium
scaffold1|size1664507	fig|6666666.156949.peg.820	peg	scaffold1|size1664507_718122_717691	718122	717691	-	FIG00646845: hypothetical YMCA protein	FIG00646845	NA
scaffold1|size1664507	fig|6666666.156949.peg.821	peg	scaffold1|size1664507_719653_718124	719653	718124	-	tRNA-i(6)A37 methylthiotransferase	FIG00108342	isu;tRNA_modification_Bacteria isu;Methylthiotransferases isu;tRNA_processing
scaffold1|size1664507	fig|6666666.156949.peg.822	peg	scaffold1|size1664507_720979_719801	720979	719801	-	2-amino-3-ketobutyrate coenzyme A ligase (EC 2.3.1.29)	FIG00000741	isu;Glycine_Biosynthesis isu;Glycine_and_Serine_Utilization
scaffold1|size1664507	fig|6666666.156949.peg.823	peg	scaffold1|size1664507_722035_720992	722035	720992	-	L-threonine 3-dehydrogenase (EC 1.1.1.103)	FIG00003022	icw(1);Glycine_Biosynthesis isu;Threonine_degradation
scaffold1|size1664507	fig|6666666.156949.peg.824	peg	scaffold1|size1664507_722560_722300	722560	722300	-	Stage V sporulation protein required for dehydratation of the spore core and assembly of the coat (SpoVS)	FIG00006682	isu;Sporulation_gene_orphans isu;SpoVS_protein_family
scaffold1|size1664507	fig|6666666.156949.peg.825	peg	scaffold1|size1664507_723554_722760	723554	722760	-	FIG006542: Phosphoesterase	FIG00006542	isu;CBSS-257314.1.peg.676
scaffold1|size1664507	fig|6666666.156949.peg.826	peg	scaffold1|size1664507_725185_723623	725185	723623	-	FIG002344: Hydrolase (HAD superfamily)	FIG00002344	icw(1);CBSS-257314.1.peg.676 isu;CBSS-469378.4.peg.430
scaffold1|size1664507	fig|6666666.156949.peg.827	peg	scaffold1|size1664507_726636_725461	726636	725461	-	penicillin-binding protein, putative	FIG00012643	isu;CBSS-83331.1.peg.3039
scaffold1|size1664507	fig|6666666.156949.peg.828	peg	scaffold1|size1664507_727850_726804	727850	726804	-	RecA protein	FIG00000234	idu(1);DNA_repair_system_including_RecA,_MutS_and_a_hypothetical_protein idu(1);DNA_repair,_bacterial idu(1);DNA_repair,_bacterial_UmuCD_system idu(1);DNA-replication idu(1);DNA_repair,_bacterial_RecFOR_pathway icw(4);CBSS-257314.1.peg.676 icw(1);CBSS-469378.4.peg.430
scaffold1|size1664507	fig|6666666.156949.peg.829	peg	scaffold1|size1664507_729273_728023	729273	728023	-	Molybdopterin binding motif, CinA N-terminal domain / C-terminal domain of CinA type S	FIG01304044	isu;NAD_and_NADP_cofactor_biosynthesis_global isu;Riboflavin_synthesis_cluster
scaffold1|size1664507	fig|6666666.156949.peg.830	peg	scaffold1|size1664507_729872_729291	729872	729291	-	CDP-diacylglycerol--glycerol-3-phosphate 3-phosphatidyltransferase (EC 2.7.8.5)	FIG00001550	isu;Glycerolipid_and_Glycerophospholipid_Metabolism_in_Bacteria icw(2);CBSS-257314.1.peg.676
scaffold1|size1664507	fig|6666666.156949.peg.831	peg	scaffold1|size1664507_730836_729922	730836	729922	-	Transcriptional regulator in cluster with unspecified monosaccharide ABC transport system	FIG00002490	icw(5);Unspecified_monosaccharide_transport_cluster icw(4);CBSS-257314.1.peg.676
scaffold1|size1664507	fig|6666666.156949.peg.832	peg	scaffold1|size1664507_731646_730855	731646	730855	-	ACT domain protein	FIG00003568	icw(4);Unspecified_monosaccharide_transport_cluster
scaffold1|size1664507	fig|6666666.156949.peg.833	peg	scaffold1|size1664507_732033_731776	732033	731776	-	FIG007042: hypothetical protein	FIG00007042	icw(2);Unspecified_monosaccharide_transport_cluster
scaffold1|size1664507	fig|6666666.156949.peg.834	peg	scaffold1|size1664507_732842_732114	732842	732114	-	3-oxoacyl-[acyl-carrier protein] reductase paralog (EC 1.1.1.100) in cluster with unspecified monosaccharide transporter	FIG01970432	isu;Unspecified_monosaccharide_transport_cluster isu;CBSS-257314.1.peg.676
scaffold1|size1664507	fig|6666666.156949.peg.835	peg	scaffold1|size1664507_734183_732897	734183	732897	-	FIG009210: peptidase, M16 family	FIG00009210	icw(2);Unspecified_monosaccharide_transport_cluster icw(1);CBSS-257314.1.peg.676
scaffold1|size1664507	fig|6666666.156949.peg.836	peg	scaffold1|size1664507_735460_734180	735460	734180	-	FIG001621: Zinc protease	FIG00001621	icw(4);Unspecified_monosaccharide_transport_cluster icw(2);CBSS-257314.1.peg.676
scaffold1|size1664507	fig|6666666.156949.peg.837	peg	scaffold1|size1664507_736872_735640	736872	735640	-	Siderophore transport protein	FIG00029159	NA
scaffold1|size1664507	fig|6666666.156949.peg.838	peg	scaffold1|size1664507_737012_736875	737012	736875	-	hypothetical protein	NA	NA
scaffold1|size1664507	fig|6666666.156949.peg.839	peg	scaffold1|size1664507_737715_736990	737715	736990	-	Transcriptional regulator in cluster with Zn-dependent hydrolase	FIG00003547	isu;Bacterial_RNA-metabolizing_Zn-dependent_hydrolases icw(1);Unspecified_monosaccharide_transport_cluster
scaffold1|size1664507	fig|6666666.156949.peg.840	peg	scaffold1|size1664507_740222_737859	740222	737859	-	Cell division protein FtsK	FIG00000287	icw(2);Bacterial_RNA-metabolizing_Zn-dependent_hydrolases idu(1);Bacterial_Cell_Division idu(1);Bacterial_Cytoskeleton icw(2);Unspecified_monosaccharide_transport_cluster
scaffold1|size1664507	fig|6666666.156949.peg.841	peg	scaffold1|size1664507_740565_740353	740565	740353	-	FIG01225515: hypothetical protein	FIG01225514	NA
scaffold1|size1664507	fig|6666666.156949.peg.842	peg	scaffold1|size1664507_741299_740562	741299	740562	-	Translocation-enhancing protein TepA	FIG01031938	NA
scaffold1|size1664507	fig|6666666.156949.peg.843	peg	scaffold1|size1664507_743082_741415	743082	741415	-	Ribonuclease J2 (endoribonuclease in RNA processing)	FIG00001316	icw(1);Bacterial_RNA-metabolizing_Zn-dependent_hydrolases isu;Ribonucleases_in_Bacillus
scaffold1|size1664507	fig|6666666.156949.peg.844	peg	scaffold1|size1664507_744132_743260	744132	743260	-	4-hydroxy-tetrahydrodipicolinate synthase (EC 4.3.3.7)	FIG00019600	icw(1);Lysine_Biosynthesis_DAP_Pathway icw(1);Lysine_Biosynthesis_DAP_Pathway,_GJO_scratch
scaffold1|size1664507	fig|6666666.156949.peg.845	peg	scaffold1|size1664507_745377_744163	745377	744163	-	Aspartokinase (EC 2.7.2.4)	FIG00000132	icw(2);Lysine_Biosynthesis_DAP_Pathway icw(2);Lysine_Biosynthesis_DAP_Pathway,_GJO_scratch icw(1);Threonine_and_Homoserine_Biosynthesis
scaffold1|size1664507	fig|6666666.156949.peg.846	peg	scaffold1|size1664507_746509_745469	746509	745469	-	Aspartate-semialdehyde dehydrogenase (EC 1.2.1.11)	FIG00026137	isu;Lysine_Biosynthesis_DAP_Pathway isu;Lysine_Biosynthesis_DAP_Pathway,_GJO_scratch isu;Threonine_and_Homoserine_Biosynthesis
scaffold1|size1664507	fig|6666666.156949.peg.847	peg	scaffold1|size1664507_747237_746635	747237	746635	-	Dipicolinate synthase subunit B	FIG00007304	icw(1);Dipicolinate_Synthesis
scaffold1|size1664507	fig|6666666.156949.peg.848	peg	scaffold1|size1664507_748133_747240	748133	747240	-	Dipicolinate synthase subunit A (EC 4.2.1.52)	FIG00004651	isu;Dipicolinate_Synthesis isu;CBSS-350688.3.peg.1509
scaffold1|size1664507	fig|6666666.156949.peg.849	peg	scaffold1|size1664507_748254_748135	748254	748135	-	hypothetical protein	NA	NA
scaffold1|size1664507	fig|6666666.156949.peg.850	peg	scaffold1|size1664507_748576_748319	748576	748319	-	FIG007697: hypothetical protein	FIG00007697	icw(1);CBSS-350688.3.peg.1509
scaffold1|size1664507	fig|6666666.156949.peg.851	peg	scaffold1|size1664507_749883_748654	749883	748654	-	FIG007959: peptidase, M16 family	FIG00007959	icw(3);CBSS-350688.3.peg.1509 isu;CBSS-1806.1.peg.3045
scaffold1|size1664507	fig|6666666.156949.peg.852	peg	scaffold1|size1664507_750882_749923	750882	749923	-	FIG007013: polysaccharide deacetylase, putative	FIG00007013	icw(6);CBSS-350688.3.peg.1509
scaffold1|size1664507	fig|6666666.156949.peg.853	peg	scaffold1|size1664507_753116_750999	753116	750999	-	Polyribonucleotide nucleotidyltransferase (EC 2.7.7.8)	FIG00000391	isu;Bacterial_RNA-metabolizing_Zn-dependent_hydrolases icw(4);CBSS-350688.3.peg.1509 icw(1);CBSS-1806.1.peg.3045 isu;Polyadenylation_bacterial
scaffold1|size1664507	fig|6666666.156949.peg.854	peg	scaffold1|size1664507_754665_753715	754665	753715	-	Riboflavin kinase (EC 2.7.1.26) / FMN adenylyltransferase (EC 2.7.7.2)	FIG00000220	isu;Riboflavin,_FMN_and_FAD_metabolism isu;Riboflavin,_FMN_and_FAD_metabolism isu;CBSS-350688.3.peg.1509 icw(5);CBSS-350688.3.peg.1509 isu;riboflavin_to_FAD isu;riboflavin_to_FAD
scaffold1|size1664507	fig|6666666.156949.peg.855	peg	scaffold1|size1664507_755613_754684	755613	754684	-	tRNA pseudouridine synthase B (EC 4.2.1.70)	FIG01016270	isu;tRNA_modification_Bacteria icw(7);CBSS-350688.3.peg.1509 icw(2);CBSS-138119.3.peg.2719 isu;tRNA_processing isu;RNA_pseudouridine_syntheses
scaffold1|size1664507	fig|6666666.156949.peg.856	peg	scaffold1|size1664507_756042_755695	756042	755695	-	Ribosome-binding factor A	FIG00000164	icw(1);Translation_initiation_factors_bacterial icw(6);CBSS-350688.3.peg.1509 icw(1);CBSS-138119.3.peg.2719 icw(4);NusA-TFII_Cluster
scaffold1|size1664507	fig|6666666.156949.peg.857	peg	scaffold1|size1664507_756343_756065	756343	756065	-	YlxP-like protein	FIG00001863	icw(9);CBSS-350688.3.peg.1509 icw(6);NusA-TFII_Cluster
scaffold1|size1664507	fig|6666666.156949.peg.858	peg	scaffold1|size1664507_758490_756340	758490	756340	-	Translation initiation factor 2	FIG00000102	isu;Translation_initiation_factors_bacterial icw(1);CBSS-350688.3.peg.1509 isu;CBSS-138119.3.peg.2719 isu;Universal_GTPases isu;NusA-TFII_Cluster
scaffold1|size1664507	fig|6666666.156949.peg.859	peg	scaffold1|size1664507_758740_758510	758740	758510	-	ribosomal protein L7Ae family protein	FIG00001489	icw(7);CBSS-350688.3.peg.1509 icw(5);NusA-TFII_Cluster isu;Transcription_factors_bacterial
scaffold1|size1664507	fig|6666666.156949.peg.860	peg	scaffold1|size1664507_759038_758814	759038	758814	-	COG2740: Predicted nucleic-acid-binding protein implicated in transcription termination	FIG00001133	icw(3);CBSS-350688.3.peg.1509 icw(2);NusA-TFII_Cluster icw(1);Transcription_factors_bacterial
scaffold1|size1664507	fig|6666666.156949.peg.861	peg	scaffold1|size1664507_760218_759103	760218	759103	-	Transcription termination protein NusA	FIG00000168	icw(4);CBSS-350688.3.peg.1509 icw(3);NusA-TFII_Cluster icw(3);Transcription_factors_bacterial
scaffold1|size1664507	fig|6666666.156949.peg.862	peg	scaffold1|size1664507_760723_760253	760723	760253	-	FIG000325: clustered with transcription termination protein NusA	FIG00000325	icw(3);CBSS-350688.3.peg.1509 icw(1);NusA-TFII_Cluster icw(2);Transcription_factors_bacterial
scaffold1|size1664507	fig|6666666.156949.peg.863	peg	scaffold1|size1664507_765366_761053	765366	761053	-	DNA polymerase III alpha subunit (EC 2.7.7.7)	FIG00008411	idu(1);CBSS-269801.1.peg.809 idu(1);CBSS-350688.3.peg.1509 idu(1);DNA-replication
scaffold1|size1664507	fig|6666666.156949.peg.864	peg	scaffold1|size1664507_767169_765475	767169	765475	-	Prolyl-tRNA synthetase (EC 6.1.1.15), bacterial type	FIG00000069	isu;tRNA_aminoacylation,_Pro
scaffold1|size1664507	fig|6666666.156949.peg.865	peg	scaffold1|size1664507_768464_767202	768464	767202	-	Membrane-associated zinc metalloprotease	FIG00002803	NA
scaffold1|size1664507	fig|6666666.156949.peg.866	peg	scaffold1|size1664507_769628_768477	769628	768477	-	1-deoxy-D-xylulose 5-phosphate reductoisomerase (EC 1.1.1.267)	FIG00000401	isu;CBSS-83331.1.peg.3039 isu;Isoprenoid_Biosynthesis isu;Nonmevalonate_Branch_of_Isoprenoid_Biosynthesis
scaffold1|size1664507	fig|6666666.156949.peg.867	peg	scaffold1|size1664507_770490_769690	770490	769690	-	Phosphatidate cytidylyltransferase (EC 2.7.7.41)	FIG00000097	isu;Glycerolipid_and_Glycerophospholipid_Metabolism_in_Bacteria
scaffold1|size1664507	fig|6666666.156949.peg.868	peg	scaffold1|size1664507_771285_770503	771285	770503	-	Undecaprenyl diphosphate synthase (EC 2.5.1.31)	NA	isu;Polyprenyl_Diphosphate_Biosynthesis isu;Isoprenoinds_for_Quinones icw(1);CBSS-83331.1.peg.3039 icw(1);Isoprenoid_Biosynthesis
scaffold1|size1664507	fig|6666666.156949.peg.869	peg	scaffold1|size1664507_771973_771416	771973	771416	-	Ribosome recycling factor	FIG00000202	icw(1);Ribosome_recycling_related_cluster isu;Translation_termination_factors_bacterial
scaffold1|size1664507	fig|6666666.156949.peg.870	peg	scaffold1|size1664507_772697_771975	772697	771975	-	Uridine monophosphate kinase (EC 2.7.4.22)	FIG00001819	icw(2);CBSS-312309.3.peg.1965 icw(3);Ribosome_recycling_related_cluster
scaffold1|size1664507	fig|6666666.156949.peg.871	peg	scaffold1|size1664507_773724_772843	773724	772843	-	Translation elongation factor Ts	FIG00000191	icw(1);CBSS-312309.3.peg.1965 isu;Translation_elongation_factors_bacterial icw(2);Ribosome_recycling_related_cluster
scaffold1|size1664507	fig|6666666.156949.peg.872	peg	scaffold1|size1664507_774566_773826	774566	773826	-	SSU ribosomal protein S2p (SAe)	FIG00037273	isu;CBSS-312309.3.peg.1965 isu;Ribosome_recycling_related_cluster
scaffold1|size1664507	fig|6666666.156949.peg.873	peg	scaffold1|size1664507_775222_774710	775222	774710	-	FIG01231449: hypothetical protein	FIG01231445	NA
scaffold1|size1664507	fig|6666666.156949.peg.874	peg	scaffold1|size1664507_776006_775242	776006	775242	-	RNA polymerase sigma factor for flagellar operon	FIG00009068	icw(1);Flagellar_motility isu;Flagellum isu;Transcription_initiation,_bacterial_sigma_factors
scaffold1|size1664507	fig|6666666.156949.peg.875	peg	scaffold1|size1664507_776529_776029	776529	776029	-	Chemotaxis protein CheD	FIG00005647	icw(4);Bacterial_Chemotaxis
scaffold1|size1664507	fig|6666666.156949.peg.876	peg	scaffold1|size1664507_777155_776526	777155	776526	-	Chemotaxis protein CheC -- inhibitor of MCP methylation	FIG00002947	isu;Bacterial_Chemotaxis
scaffold1|size1664507	fig|6666666.156949.peg.877	peg	scaffold1|size1664507_777644_777174	777644	777174	-	Positive regulator of CheA protein activity (CheW)	FIG00000652	isu;Two-component_regulatory_systems_in_Campylobacter icw(1);Bacterial_Chemotaxis
scaffold1|size1664507	fig|6666666.156949.peg.878	peg	scaffold1|size1664507_779684_777666	779684	777666	-	Signal transduction histidine kinase CheA (EC 2.7.3.-)	FIG00000571	icw(1);Flagellar_motility icw(1);Two-component_regulatory_systems_in_Campylobacter icw(2);Bacterial_Chemotaxis
scaffold1|size1664507	fig|6666666.156949.peg.879	peg	scaffold1|size1664507_780763_779690	780763	779690	-	Chemotaxis response regulator protein-glutamate methylesterase CheB (EC 3.1.1.61)	FIG00017306	icw(3);Bacterial_Chemotaxis
scaffold1|size1664507	fig|6666666.156949.peg.880	peg	scaffold1|size1664507_781655_780765	781655	780765	-	Flagellar synthesis regulator FleN	FIG00001155	isu;Flagellar_motility isu;Flagellum
scaffold1|size1664507	fig|6666666.156949.peg.881	peg	scaffold1|size1664507_782752_781652	782752	781652	-	Flagellar biosynthesis protein FlhF	FIG00000950	icw(5);Flagellar_motility icw(5);Flagellum
scaffold1|size1664507	fig|6666666.156949.peg.882	peg	scaffold1|size1664507_784785_782752	784785	782752	-	Flagellar biosynthesis protein FlhA	FIG00029709	icw(2);Flagellar_motility icw(5);Flagellum
scaffold1|size1664507	fig|6666666.156949.peg.883	peg	scaffold1|size1664507_785900_784818	785900	784818	-	Flagellar biosynthesis protein FlhB	FIG00003476	icw(5);Flagellar_motility icw(3);Flagellum
scaffold1|size1664507	fig|6666666.156949.peg.884	peg	scaffold1|size1664507_786679_785900	786679	785900	-	Flagellar biosynthesis protein FliR	FIG00000586	icw(1);Flagellar_motility icw(1);Flagellum
scaffold1|size1664507	fig|6666666.156949.peg.885	peg	scaffold1|size1664507_786932_786687	786932	786687	-	Flagellar biosynthesis protein FliQ	FIG00108124	icw(7);Flagellum
scaffold1|size1664507	fig|6666666.156949.peg.886	peg	scaffold1|size1664507_787456_786971	787456	786971	-	Flagellar biosynthesis protein FliP	FIG00138353	icw(2);Flagellum
scaffold1|size1664507	fig|6666666.156949.peg.887	peg	scaffold1|size1664507_788288_787629	788288	787629	-	Flagellar biosynthesis protein FliZ	FIG00002745	icw(5);Flagellum
scaffold1|size1664507	fig|6666666.156949.peg.888	peg	scaffold1|size1664507_788665_788303	788665	788303	-	Chemotaxis regulator - transmits chemoreceptor signals to flagelllar motor components CheY	FIG00000426	icw(6);Flagellar_motility idu(1);Two-component_regulatory_systems_in_Campylobacter icw(2);Bacterial_Chemotaxis
scaffold1|size1664507	fig|6666666.156949.peg.889	peg	scaffold1|size1664507_789827_788691	789827	788691	-	Flagellar motor switch protein FliN	FIG00002041	isu;Flagellar_motility icw(6);Flagellum icw(1);Bacterial_Chemotaxis
scaffold1|size1664507	fig|6666666.156949.peg.890	peg	scaffold1|size1664507_790815_789817	790815	789817	-	Flagellar motor switch protein FliM	FIG01290464	icw(3);Flagellar_motility icw(12);Flagellum isu;Bacterial_Chemotaxis
scaffold1|size1664507	fig|6666666.156949.peg.891	peg	scaffold1|size1664507_791271_790849	791271	790849	-	Flagellar biosynthesis protein FliL	FIG00057432	isu;Flagellum
scaffold1|size1664507	fig|6666666.156949.peg.892	peg	scaffold1|size1664507_791483_791268	791483	791268	-	Flagellar protein FlbD	FIG00125327	icw(12);Flagellum
scaffold1|size1664507	fig|6666666.156949.peg.893	peg	scaffold1|size1664507_792317_791523	792317	791523	-	Flagellar basal-body rod protein FlgG	FIG00119690	icw(6);Flagellum
scaffold1|size1664507	fig|6666666.156949.peg.894	peg	scaffold1|size1664507_792761_792339	792761	792339	-	Flagellar basal-body rod modification protein FlgD	FIG00000646	icw(2);Flagellar_motility icw(2);Flagellum
scaffold1|size1664507	fig|6666666.156949.peg.895	peg	scaffold1|size1664507_794221_792758	794221	792758	-	Flagellar hook-length control protein FliK	FIG00001074	icw(8);Flagellum
scaffold1|size1664507	fig|6666666.156949.peg.896	peg	scaffold1|size1664507_794848_794234	794848	794234	-	Flagellar protein FlbB	FIG00077673	icw(4);Flagellum
scaffold1|size1664507	fig|6666666.156949.peg.897	peg	scaffold1|size1664507_795303_794860	795303	794860	-	Flagellar protein FliJ	FIG00001147	icw(6);Flagellum
scaffold1|size1664507	fig|6666666.156949.peg.898	peg	scaffold1|size1664507_796622_795306	796622	795306	-	Flagellum-specific ATP synthase FliI	FIG01955945	isu;Flagellar_motility icw(9);Flagellum
scaffold1|size1664507	fig|6666666.156949.peg.899	peg	scaffold1|size1664507_797371_796619	797371	796619	-	Flagellar assembly protein FliH	FIG00000850	isu;Flagellum
scaffold1|size1664507	fig|6666666.156949.peg.900	peg	scaffold1|size1664507_798380_797364	798380	797364	-	Flagellar motor switch protein FliG	FIG00000610	icw(9);Flagellum isu;Bacterial_Chemotaxis
scaffold1|size1664507	fig|6666666.156949.peg.901	peg	scaffold1|size1664507_800003_798393	800003	798393	-	Flagellar M-ring protein FliF	FIG00017343	icw(1);Flagellum
scaffold1|size1664507	fig|6666666.156949.peg.902	peg	scaffold1|size1664507_800369_800049	800369	800049	-	Flagellar hook-basal body complex protein FliE	FIG00078127	icw(3);Flagellum icw(1);Flagellum_in_Campylobacter
scaffold1|size1664507	fig|6666666.156949.peg.903	peg	scaffold1|size1664507_800832_800380	800832	800380	-	Flagellar basal-body rod protein FlgC	FIG00000587	icw(2);Flagellum isu;Flagellum_in_Campylobacter
scaffold1|size1664507	fig|6666666.156949.peg.904	peg	scaffold1|size1664507_801221_800832	801221	800832	-	Flagellar basal-body rod protein FlgB	FIG00133479	icw(4);Flagellum icw(2);Flagellum_in_Campylobacter
scaffold1|size1664507	fig|6666666.156949.peg.905	peg	scaffold1|size1664507_802380_801601	802380	801601	-	GTP-sensing transcriptional pleiotropic repressor codY	FIG00001663	icw(1);Conserved_gene_cluster_associated_with_Met-tRNA_formyltransferase
scaffold1|size1664507	fig|6666666.156949.peg.906	peg	scaffold1|size1664507_803823_802420	803823	802420	-	ATP-dependent hsl protease ATP-binding subunit HslU	FIG00000505	icw(1);Proteolysis_in_bacteria,_ATP-dependent icw(1);Proteasome_bacterial
scaffold1|size1664507	fig|6666666.156949.peg.907	peg	scaffold1|size1664507_804385_803840	804385	803840	-	ATP-dependent protease HslV (EC 3.4.25.-)	FIG00000487	isu;Proteolysis_in_bacteria,_ATP-dependent icw(2);Proteasome_bacterial
scaffold1|size1664507	fig|6666666.156949.peg.908	peg	scaffold1|size1664507_805312_804398	805312	804398	-	Site-specific tyrosine recombinase	FIG00012692	isu;Proteasome_bacterial
scaffold1|size1664507	fig|6666666.156949.peg.909	peg	scaffold1|size1664507_806687_805380	806687	805380	-	tRNA:m(5)U-54 MTase gid	FIG00138239	isu;tRNA_modification_Bacteria isu;Conserved_gene_cluster_associated_with_Met-tRNA_formyltransferase
scaffold1|size1664507	fig|6666666.156949.peg.910	peg	scaffold1|size1664507_808838_806763	808838	806763	-	DNA topoisomerase I (EC 5.99.1.2)	FIG00000204	icw(1);CBSS-272943.3.peg.1367 isu;DNA_topoisomerases,_Type_I,_ATP-independent icw(1);Conserved_gene_cluster_associated_with_Met-tRNA_formyltransferase isu;pVir_Plasmid_of_Campylobacter
scaffold1|size1664507	fig|6666666.156949.peg.911	peg	scaffold1|size1664507_809919_809026	809919	809026	-	Rossmann fold nucleotide-binding protein Smf possibly involved in DNA uptake	FIG00035268	isu;CBSS-272943.3.peg.1367 icw(2);Conserved_gene_cluster_associated_with_Met-tRNA_formyltransferase
scaffold1|size1664507	fig|6666666.156949.peg.912	peg	scaffold1|size1664507_810882_809980	810882	809980	-	Succinyl-CoA ligase [ADP-forming] alpha chain (EC 6.2.1.5)	FIG00038611	isu;TCA_Cycle isu;Serine-glyoxylate_cycle
scaffold1|size1664507	fig|6666666.156949.peg.913	peg	scaffold1|size1664507_812068_810911	812068	810911	-	Succinyl-CoA ligase [ADP-forming] beta chain (EC 6.2.1.5)	FIG00000337	icw(1);TCA_Cycle icw(1);Serine-glyoxylate_cycle
scaffold1|size1664507	fig|6666666.156949.peg.914	peg	scaffold1|size1664507_812522_812241	812522	812241	-	Flagellar biosynthesis protein FlhB	FIG00003476	idu(1);Flagellar_motility idu(1);Flagellum
scaffold1|size1664507	fig|6666666.156949.peg.915	peg	scaffold1|size1664507_814249_812519	814249	812519	-	FIG01230345: hypothetical protein	FIG01230342	NA
scaffold1|size1664507	fig|6666666.156949.peg.916	peg	scaffold1|size1664507_815047_814280	815047	814280	-	Ribonuclease HII (EC 3.1.26.4)	FIG00000126	isu;Ribonuclease_H isu;Ribonucleases_in_Bacillus isu;DNA_replication,_archaeal icw(1);Conserved_gene_cluster_associated_with_Met-tRNA_formyltransferase
scaffold1|size1664507	fig|6666666.156949.peg.917	peg	scaffold1|size1664507_815966_815118	815966	815118	-	50S ribosomal subunit maturation GTPase RbgA (B. subtilis YlqF)	FIG00000840	icw(1);Universal_GTPases isu;Conserved_gene_cluster_associated_with_Met-tRNA_formyltransferase
scaffold1|size1664507	fig|6666666.156949.peg.918	peg	scaffold1|size1664507_816456_816109	816456	816109	-	LSU ribosomal protein L19p	FIG00000214	isu;Ribosome_LSU_bacterial
scaffold1|size1664507	fig|6666666.156949.peg.919	peg	scaffold1|size1664507_817327_816596	817327	816596	-	tRNA (Guanine37-N1) -methyltransferase (EC 2.1.1.31)	FIG00000230	isu;tRNA_modification_Bacteria isu;RNA_methylation icw(1);Ribosome_biogenesis_bacterial
scaffold1|size1664507	fig|6666666.156949.peg.920	peg	scaffold1|size1664507_817848_817324	817848	817324	-	16S rRNA processing protein RimM	FIG00000312	isu;Ribosome_biogenesis_bacterial isu;KH_domain_RNA_binding_protein_YlqC
scaffold1|size1664507	fig|6666666.156949.peg.921	peg	scaffold1|size1664507_818239_817853	818239	817853	-	FIG01228237: hypothetical protein	FIG00774276	NA
scaffold1|size1664507	fig|6666666.156949.peg.922	peg	scaffold1|size1664507_818606_818361	818606	818361	-	KH domain RNA binding protein YlqC	FIG00005628	icw(1);KH_domain_RNA_binding_protein_YlqC
scaffold1|size1664507	fig|6666666.156949.peg.923	peg	scaffold1|size1664507_818878_818606	818878	818606	-	SSU ribosomal protein S16p	FIG00000193	icw(2);KH_domain_RNA_binding_protein_YlqC
scaffold1|size1664507	fig|6666666.156949.peg.924	peg	scaffold1|size1664507_820324_818984	820324	818984	-	Signal recognition particle, subunit Ffh SRP54 (TC 3.A.5.1.1)	FIG00000113	isu;Bacterial_signal_recognition_particle_(SRP) isu;Universal_GTPases
scaffold1|size1664507	fig|6666666.156949.peg.925	peg	scaffold1|size1664507_820670_820338	820670	820338	-	Signal recognition particle associated protein	FIG00001470	icw(1);Bacterial_signal_recognition_particle_(SRP)
scaffold1|size1664507	fig|6666666.156949.peg.926	peg	scaffold1|size1664507_820847_821332	820847	821332	+	FIG01236791: hypothetical protein	FIG01236785	NA
scaffold1|size1664507	fig|6666666.156949.peg.927	peg	scaffold1|size1664507_822357_821368	822357	821368	-	Signal recognition particle receptor protein FtsY (=alpha subunit) (TC 3.A.5.1.1)	FIG00000095	icw(2);Bacterial_signal_recognition_particle_(SRP) isu;Bacterial_Cell_Division icw(1);Universal_GTPases
scaffold1|size1664507	fig|6666666.156949.peg.928	peg	scaffold1|size1664507_825937_822377	825937	822377	-	Chromosome partition protein smc	FIG00026918	isu;DNA_structural_proteins,_bacterial
scaffold1|size1664507	fig|6666666.156949.peg.929	peg	scaffold1|size1664507_826787_826038	826787	826038	-	Ribonuclease III (EC 3.1.26.3)	FIG00000208	isu;RNA_processing_and_degradation,_bacterial isu;CBSS-176299.4.peg.1292
scaffold1|size1664507	fig|6666666.156949.peg.930	peg	scaffold1|size1664507_827160_826927	827160	826927	-	Acyl carrier protein	FIG00002328	icw(1);Fatty_Acid_Biosynthesis_FASII idu(1);Glycerolipid_and_Glycerophospholipid_Metabolism_in_Bacteria
scaffold1|size1664507	fig|6666666.156949.peg.931	peg	scaffold1|size1664507_827984_827244	827984	827244	-	3-oxoacyl-[acyl-carrier protein] reductase (EC 1.1.1.100)	FIG00621114	idu(6);CBSS-246196.1.peg.364 idu(6);Fatty_Acid_Biosynthesis_FASII
scaffold1|size1664507	fig|6666666.156949.peg.932	peg	scaffold1|size1664507_828930_827977	828930	827977	-	Malonyl CoA-acyl carrier protein transacylase (EC 2.3.1.39)	FIG00000319	icw(2);Fatty_Acid_Biosynthesis_FASII
scaffold1|size1664507	fig|6666666.156949.peg.933	peg	scaffold1|size1664507_829950_828949	829950	828949	-	Phosphate:acyl-ACP acyltransferase PlsX	FIG00000446	icw(2);Glycerolipid_and_Glycerophospholipid_Metabolism_in_Bacteria
scaffold1|size1664507	fig|6666666.156949.peg.934	peg	scaffold1|size1664507_830530_829964	830530	829964	-	Phosphate:acyl-ACP acyltransferase PlsX	FIG00000446	icw(3);Glycerolipid_and_Glycerophospholipid_Metabolism_in_Bacteria
scaffold1|size1664507	fig|6666666.156949.peg.935	peg	scaffold1|size1664507_832687_830639	832687	830639	-	ATP-dependent DNA helicase RecG (EC 3.6.1.-)	FIG01959944	isu;DNA-replication isu;A_Gram-positive_cluster_that_relates_ribosomal_protein_L28P_to_a_set_of_uncharacterized_proteins
scaffold1|size1664507	fig|6666666.156949.peg.936	peg	scaffold1|size1664507_833567_832665	833567	832665	-	L-serine dehydratase, alpha subunit (EC 4.3.1.17)	FIG00001440	isu;Glycine_and_Serine_Utilization isu;Pyruvate_Alanine_Serine_Interconversions
scaffold1|size1664507	fig|6666666.156949.peg.937	peg	scaffold1|size1664507_834255_833593	834255	833593	-	L-serine dehydratase, beta subunit (EC 4.3.1.17)	FIG00010818	icw(1);Glycine_and_Serine_Utilization icw(1);Pyruvate_Alanine_Serine_Interconversions
scaffold1|size1664507	fig|6666666.156949.peg.938	peg	scaffold1|size1664507_836055_834394	836055	834394	-	Dihydroxyacetone kinase family protein	FIG00042616	icw(5);A_Gram-positive_cluster_that_relates_ribosomal_protein_L28P_to_a_set_of_uncharacterized_proteins isu;Glycerolipid_and_Glycerophospholipid_Metabolism_in_Bacteria
scaffold1|size1664507	fig|6666666.156949.peg.939	peg	scaffold1|size1664507_836433_836071	836433	836071	-	FIG001802: Putative alkaline-shock protein	FIG00001802	icw(4);A_Gram-positive_cluster_that_relates_ribosomal_protein_L28P_to_a_set_of_uncharacterized_proteins
scaffold1|size1664507	fig|6666666.156949.peg.940	peg	scaffold1|size1664507_836710_836898	836710	836898	+	LSU ribosomal protein L28p	NA	isu;Ribosome_LSU_bacterial isu;A_Gram-positive_cluster_that_relates_ribosomal_protein_L28P_to_a_set_of_uncharacterized_proteins
scaffold1|size1664507	fig|6666666.156949.peg.941	peg	scaffold1|size1664507_837767_837123	837767	837123	-	Thiamin pyrophosphokinase (EC 2.7.6.2)	FIG00001175	isu;Thiamin_biosynthesis icw(1);A_Gram-positive_cluster_that_relates_ribosomal_protein_L28P_to_a_set_of_uncharacterized_proteins
scaffold1|size1664507	fig|6666666.156949.peg.942	peg	scaffold1|size1664507_838493_837840	838493	837840	-	Ribulose-phosphate 3-epimerase (EC 5.1.3.1)	FIG00000047	isu;Pentose_phosphate_pathway isu;Conserved_gene_cluster_associated_with_Met-tRNA_formyltransferase isu;Riboflavin_synthesis_cluster isu;Calvin-Benson_cycle icw(2);A_Gram-positive_cluster_that_relates_ribosomal_protein_L28P_to_a_set_of_uncharacterized_proteins
scaffold1|size1664507	fig|6666666.156949.peg.943	peg	scaffold1|size1664507_839394_838498	839394	838498	-	Ribosome small subunit-stimulated GTPase EngC	FIG00000464	isu;Universal_GTPases icw(5);A_Gram-positive_cluster_that_relates_ribosomal_protein_L28P_to_a_set_of_uncharacterized_proteins
scaffold1|size1664507	fig|6666666.156949.peg.944	peg	scaffold1|size1664507_841355_839409	841355	839409	-	Serine/threonine protein kinase PrkC, regulator of stationary phase	FIG00030191	icw(3);Conserved_gene_cluster_associated_with_Met-tRNA_formyltransferase icw(5);A_Gram-positive_cluster_that_relates_ribosomal_protein_L28P_to_a_set_of_uncharacterized_proteins
scaffold1|size1664507	fig|6666666.156949.peg.945	peg	scaffold1|size1664507_842113_841349	842113	841349	-	Protein serine/threonine phosphatase PrpC, regulation of stationary phase	FIG00134722	icw(2);Conserved_gene_cluster_associated_with_Met-tRNA_formyltransferase
scaffold1|size1664507	fig|6666666.156949.peg.946	peg	scaffold1|size1664507_843211_842120	843211	842120	-	Ribosomal RNA large subunit methyltransferase N (EC 2.1.1.-)	FIG00000293	isu;RNA_methylation icw(5);Conserved_gene_cluster_associated_with_Met-tRNA_formyltransferase
scaffold1|size1664507	fig|6666666.156949.peg.947	peg	scaffold1|size1664507_844558_843215	844558	843215	-	Ribosomal RNA small subunit methyltransferase B (EC 2.1.1.-)	FIG00138175	NA
scaffold1|size1664507	fig|6666666.156949.peg.948	peg	scaffold1|size1664507_845498_844545	845498	844545	-	Methionyl-tRNA formyltransferase (EC 2.1.2.9)	FIG00000112	isu;Translation_initiation_factors_bacterial icw(2);Conserved_gene_cluster_associated_with_Met-tRNA_formyltransferase icw(1);CBSS-89187.3.peg.2957
scaffold1|size1664507	fig|6666666.156949.peg.949	peg	scaffold1|size1664507_845985_845503	845985	845503	-	Peptide deformylase (EC 3.5.1.88)	FIG00000017	idu(1);Bacterial_RNA-metabolizing_Zn-dependent_hydrolases idu(1);Conserved_gene_cluster_associated_with_Met-tRNA_formyltransferase idu(1);CBSS-89187.3.peg.2957 idu(1);Translation_termination_factors_bacterial
scaffold1|size1664507	fig|6666666.156949.peg.950	peg	scaffold1|size1664507_848429_846012	848429	846012	-	Helicase PriA essential for oriC/DnaA-independent DNA replication	FIG00080955	icw(3);Conserved_gene_cluster_associated_with_Met-tRNA_formyltransferase isu;DNA-replication
scaffold1|size1664507	fig|6666666.156949.peg.951	peg	scaffold1|size1664507_849616_848426	849616	848426	-	Phosphopantothenoylcysteine decarboxylase (EC 4.1.1.36) / Phosphopantothenoylcysteine synthetase (EC 6.3.2.5)	FIG00000330	isu;Coenzyme_A_Biosynthesis isu;Coenzyme_A_Biosynthesis
scaffold1|size1664507	fig|6666666.156949.peg.952	peg	scaffold1|size1664507_849930_849727	849930	849727	-	DNA-directed RNA polymerase omega subunit (EC 2.7.7.6)	FIG00000394	isu;CBSS-176299.4.peg.1292 isu;RNA_polymerase_bacterial
scaffold1|size1664507	fig|6666666.156949.peg.953	peg	scaffold1|size1664507_850548_849934	850548	849934	-	Guanylate kinase (EC 2.7.4.8)	FIG00000131	isu;Purine_conversions icw(1);CBSS-323097.3.peg.2594
scaffold1|size1664507	fig|6666666.156949.peg.954	peg	scaffold1|size1664507_850825_850556	850825	850556	-	FIG003307: hypothetical protein	FIG00003307	icw(2);CBSS-323097.3.peg.2594
scaffold1|size1664507	fig|6666666.156949.peg.955	peg	scaffold1|size1664507_851765_850902	851765	850902	-	Protein YicC	FIG00032749	isu;CBSS-323097.3.peg.2594
scaffold1|size1664507	fig|6666666.156949.peg.956	peg	scaffold1|size1664507_854532_851860	854532	851860	-	Ca ion P-type ATPase	FIG01335789	NA
scaffold1|size1664507	fig|6666666.156949.peg.957	peg	scaffold1|size1664507_854654_856366	854654	856366	+	Fibronectin/fibrinogen-binding protein	FIG00138381	isu;Adhesion_of_Campylobacter
scaffold1|size1664507	fig|6666666.156949.peg.958	peg	scaffold1|size1664507_856894_856406	856894	856406	-	Siroheme synthase / Precorrin-2 oxidase (EC 1.3.1.76)	FIG00002381	isu;Heme_and_Siroheme_Biosynthesis
scaffold1|size1664507	fig|6666666.156949.peg.959	peg	scaffold1|size1664507_857660_856875	857660	856875	-	Sirohydrochlorin ferrochelatase (EC 4.99.1.4)	FIG00132864	icw(2);Heme_and_Siroheme_Biosynthesis
scaffold1|size1664507	fig|6666666.156949.peg.960	peg	scaffold1|size1664507_858436_857663	858436	857663	-	Uroporphyrinogen-III methyltransferase (EC 2.1.1.107)	FIG00109555	icw(1);Heme_and_Siroheme_Biosynthesis idu(1);Coenzyme_B12_biosynthesis idu(1);Dissimilatory_nitrite_reductase
scaffold1|size1664507	fig|6666666.156949.peg.961	peg	scaffold1|size1664507_859128_858535	859128	858535	-	Adenylylsulfate kinase (EC 2.7.1.25)	FIG00000821	idu(1);O-Methyl_Phosphoramidate_Capsule_Modification_in_Campylobacter idu(1);Cysteine_Biosynthesis idu(1);Inorganic_Sulfur_Assimilation
scaffold1|size1664507	fig|6666666.156949.peg.962	peg	scaffold1|size1664507_860289_859141	860289	859141	-	Sulfate adenylyltransferase, dissimilatory-type (EC 2.7.7.4)	FIG01962692	icw(2);Inorganic_Sulfur_Assimilation
scaffold1|size1664507	fig|6666666.156949.peg.963	peg	scaffold1|size1664507_861402_860338	861402	860338	-	Sulfate permease, Pit-type	FIG00089384	icw(3);Inorganic_Sulfur_Assimilation
scaffold1|size1664507	fig|6666666.156949.peg.964	peg	scaffold1|size1664507_862115_861414	862115	861414	-	Phosphoadenylyl-sulfate reductase [thioredoxin] (EC 1.8.4.8) / Adenylyl-sulfate reductase [thioredoxin] (EC 1.8.4.10)	FIG01303877	icw(1);Cysteine_Biosynthesis icw(1);Inorganic_Sulfur_Assimilation icw(2);Inorganic_Sulfur_Assimilation
scaffold1|size1664507	fig|6666666.156949.peg.965	peg	scaffold1|size1664507_863162_862530	863162	862530	-	Orotate phosphoribosyltransferase (EC 2.4.2.10)	FIG00025759	icw(3);De_Novo_Pyrimidine_Synthesis
scaffold1|size1664507	fig|6666666.156949.peg.966	peg	scaffold1|size1664507_863878_863159	863878	863159	-	Orotidine 5'-phosphate decarboxylase (EC 4.1.1.23)	FIG00000173	isu;De_Novo_Pyrimidine_Synthesis isu;Riboflavin_synthesis_cluster
scaffold1|size1664507	fig|6666666.156949.peg.967	peg	scaffold1|size1664507_864782_863847	864782	863847	-	Dihydroorotate dehydrogenase, catalytic subunit (EC 1.3.3.1)	FIG00001054	icw(2);De_Novo_Pyrimidine_Synthesis
scaffold1|size1664507	fig|6666666.156949.peg.968	peg	scaffold1|size1664507_865552_864782	865552	864782	-	Dihydroorotate dehydrogenase electron transfer subunit (EC 1.3.3.1)	FIG00133515	icw(1);De_Novo_Pyrimidine_Synthesis
scaffold1|size1664507	fig|6666666.156949.peg.969	peg	scaffold1|size1664507_868764_865549	868764	865549	-	Carbamoyl-phosphate synthase large chain (EC 6.3.5.5)	FIG00000111	icw(1);Macromolecular_synthesis_operon icw(6);De_Novo_Pyrimidine_Synthesis
scaffold1|size1664507	fig|6666666.156949.peg.970	peg	scaffold1|size1664507_869843_868749	869843	868749	-	Carbamoyl-phosphate synthase small chain (EC 6.3.5.5)	FIG00000130	idu(1);Macromolecular_synthesis_operon icw(4);De_Novo_Pyrimidine_Synthesis
scaffold1|size1664507	fig|6666666.156949.peg.971	peg	scaffold1|size1664507_871126_869840	871126	869840	-	Dihydroorotase (EC 3.5.2.3)	FIG00000032	icw(5);De_Novo_Pyrimidine_Synthesis isu;Zinc_regulated_enzymes
scaffold1|size1664507	fig|6666666.156949.peg.972	peg	scaffold1|size1664507_872024_871110	872024	871110	-	Aspartate carbamoyltransferase (EC 2.1.3.2)	FIG00000122	icw(1);De_Novo_Pyrimidine_Synthesis
scaffold1|size1664507	fig|6666666.156949.peg.973	peg	scaffold1|size1664507_873562_872168	873562	872168	-	Uracil permease	FIG00003251	isu;De_Novo_Pyrimidine_Synthesis isu;Pyrimidine_utilization
scaffold1|size1664507	fig|6666666.156949.peg.974	peg	scaffold1|size1664507_874191_873646	874191	873646	-	Uracil phosphoribosyltransferase (EC 2.4.2.9) / Pyrimidine operon regulatory protein PyrR	FIG00000677	icw(3);De_Novo_Pyrimidine_Synthesis icw(4);De_Novo_Pyrimidine_Synthesis idu(1);pyrimidine_conversions
scaffold1|size1664507	fig|6666666.156949.peg.975	peg	scaffold1|size1664507_875285_874374	875285	874374	-	Ribosomal large subunit pseudouridine synthase D (EC 4.2.1.70)	FIG00000124	isu;Ribosome_biogenesis_bacterial isu;RNA_pseudouridine_syntheses
scaffold1|size1664507	fig|6666666.156949.peg.976	peg	scaffold1|size1664507_875751_875287	875751	875287	-	Lipoprotein signal peptidase (EC 3.4.23.36)	FIG00000081	isu;Signal_peptidase isu;CBSS-36873.1.peg.4752 isu;Sex_pheromones_in_Enterococcus_faecalis_and_other_Firmicutes isu;Lipoprotein_Biosynthesis
scaffold1|size1664507	fig|6666666.156949.peg.977	peg	scaffold1|size1664507_876228_875854	876228	875854	-	hypothetical protein	NA	NA
scaffold1|size1664507	fig|6666666.156949.peg.978	peg	scaffold1|size1664507_879137_876372	879137	876372	-	Isoleucyl-tRNA synthetase (EC 6.1.1.5)	FIG00000085	isu;tRNA_aminoacylation,_Ile icw(5);Cell_Division_Cluster
scaffold1|size1664507	fig|6666666.156949.peg.979	peg	scaffold1|size1664507_879973_879479	879973	879479	-	Cell division initiation protein DivIVA	FIG00001414	isu;Bacterial_Cell_Division isu;Bacterial_Cytoskeleton icw(3);Cell_Division_Cluster
scaffold1|size1664507	fig|6666666.156949.peg.980	peg	scaffold1|size1664507_880840_880067	880840	880067	-	FIG001583: hypothetical protein, contains S4-like RNA binding domain	FIG00001583	icw(2);Cell_Division_Cluster
scaffold1|size1664507	fig|6666666.156949.peg.981	peg	scaffold1|size1664507_881173_880901	881173	880901	-	Cell division protein YlmG/Ycf19 (putative), YggT family	FIG00013736	icw(1);Cell_Division_Cluster
scaffold1|size1664507	fig|6666666.156949.peg.982	peg	scaffold1|size1664507_881635_881180	881635	881180	-	FIG001960: FtsZ-interacting protein related to cell division	FIG00001960	icw(4);Cell_Division_Cluster
scaffold1|size1664507	fig|6666666.156949.peg.983	peg	scaffold1|size1664507_882324_881632	882324	881632	-	Hypothetical protein YggS, proline synthase co-transcribed bacterial homolog PROSC	FIG00003955	isu;Cell_Division_Cluster isu;A_Hypothetical_Protein_Related_to_Proline_Metabolism
scaffold1|size1664507	fig|6666666.156949.peg.984	peg	scaffold1|size1664507_883122_882331	883122	882331	-	COG1496: Uncharacterized conserved protein	FIG00003370	NA
scaffold1|size1664507	fig|6666666.156949.peg.985	peg	scaffold1|size1664507_883572_883327	883572	883327	-	FIG011856: hypothetical protein	FIG00011856	isu;CBSS-279010.5.peg.1697
scaffold1|size1664507	fig|6666666.156949.peg.986	peg	scaffold1|size1664507_885007_883655	885007	883655	-	Amidohydrolase YlmB, involved in salvage of thiamin pyrimidine moiety	FIG00071200	NA
scaffold1|size1664507	fig|6666666.156949.peg.987	peg	scaffold1|size1664507_885931_885137	885931	885137	-	ABC transporter, ATP-binding protein	FIG00744535	NA
scaffold1|size1664507	fig|6666666.156949.peg.988	peg	scaffold1|size1664507_886861_886079	886861	886079	-	RNA polymerase sporulation specific sigma factor SigG	FIG00003881	icw(2);CBSS-279010.5.peg.1697 icw(2);Sporulation_gene_orphans icw(1);Transcription_initiation,_bacterial_sigma_factors
scaffold1|size1664507	fig|6666666.156949.peg.989	peg	scaffold1|size1664507_887720_887001	887720	887001	-	RNA polymerase sporulation specific sigma factor SigE	FIG00004014	icw(1);CBSS-279010.5.peg.1697 isu;Sporulation_gene_orphans isu;Transcription_initiation,_bacterial_sigma_factors
scaffold1|size1664507	fig|6666666.156949.peg.990	peg	scaffold1|size1664507_888739_887783	888739	887783	-	Sporulation sigma-E factor processing peptidase (SpoIIGA)	FIG00007389	icw(1);Sporulation_gene_orphans
scaffold1|size1664507	fig|6666666.156949.peg.991	peg	scaffold1|size1664507_888937_888824	888937	888824	-	hypothetical protein	NA	NA
scaffold1|size1664507	fig|6666666.156949.peg.992	peg	scaffold1|size1664507_893207_888906	893207	888906	-	Copper binding protein, plastocyanin/azurin family	FIG00440484	isu;Copper_transport_and_blue_copper_proteins isu;Bacterial_hemoglobins
scaffold1|size1664507	fig|6666666.156949.peg.993	peg	scaffold1|size1664507_894658_893510	894658	893510	-	Cell division protein FtsZ (EC 3.4.24.-)	FIG00000145	isu;Bacterial_Cell_Division icw(2);cell_division_cluster_containing_FtsQ isu;Bacterial_Cytoskeleton icw(2);cell_division_core_of_larger_cluster isu;Cell_Division_Cluster
scaffold1|size1664507	fig|6666666.156949.peg.994	peg	scaffold1|size1664507_896016_894694	896016	894694	-	Cell division protein FtsA	FIG00000385	icw(1);Bacterial_Cell_Division isu;cell_division_cluster_containing_FtsQ icw(1);Bacterial_Cytoskeleton isu;cell_division_core_of_larger_cluster icw(1);Cell_Division_Cluster
scaffold1|size1664507	fig|6666666.156949.peg.995	peg	scaffold1|size1664507_896555_896190	896555	896190	-	FIG025307: hypothetical protein	FIG00025307	isu;CBSS-227882.1.peg.6980
scaffold1|size1664507	fig|6666666.156949.peg.996	peg	scaffold1|size1664507_897280_896573	897280	896573	-	YLXX protein	FIG00106768	icw(2);CBSS-227882.1.peg.6980
scaffold1|size1664507	fig|6666666.156949.peg.997	peg	scaffold1|size1664507_897998_897303	897998	897303	-	Division initiation protein	FIG00008602	icw(3);CBSS-227882.1.peg.6980
scaffold1|size1664507	fig|6666666.156949.peg.998	peg	scaffold1|size1664507_898786_897995	898786	897995	-	Cell division protein FtsQ	FIG00021517	icw(3);Bacterial_Cell_Division icw(1);cell_division_cluster_containing_FtsQ icw(3);Bacterial_Cytoskeleton icw(2);cell_division_core_of_larger_cluster icw(1);CBSS-227882.1.peg.6980 icw(3);Cell_Division_Cluster
scaffold1|size1664507	fig|6666666.156949.peg.999	peg	scaffold1|size1664507_899827_898916	899827	898916	-	UDP-N-acetylenolpyruvoylglucosamine reductase (EC 1.1.1.158)	FIG00000163	isu;UDP-N-acetylmuramate_from_Fructose-6-phosphate_Biosynthesis isu;Peptidoglycan_Biosynthesis
scaffold1|size1664507	fig|6666666.156949.peg.1000	peg	scaffold1|size1664507_900950_899859	900950	899859	-	UDP-N-acetylglucosamine--N-acetylmuramyl-(pentapeptide) pyrophosphoryl-undecaprenol N-acetylglucosamine transferase (EC 2.4.1.227)	FIG00047056	isu;cell_division_core_of_larger_cluster icw(2);Peptidoglycan_Biosynthesis isu;Cell_Division_Cluster
scaffold1|size1664507	fig|6666666.156949.peg.1001	peg	scaffold1|size1664507_902183_901071	902183	901071	-	Cell division protein FtsW / Stage V sporulation protein E	FIG01303745	idu(2);Bacterial_Cell_Division icw(1);cell_division_cluster_containing_FtsQ idu(2);Bacterial_Cytoskeleton isu;Sporulation_gene_orphans
scaffold1|size1664507	fig|6666666.156949.peg.1002	peg	scaffold1|size1664507_903587_902232	903587	902232	-	UDP-N-acetylmuramoylalanine--D-glutamate ligase (EC 6.3.2.9)	FIG00085033	icw(3);Peptidoglycan_Biosynthesis isu;Peptidoglycan_biosynthesis--gjo
scaffold1|size1664507	fig|6666666.156949.peg.1003	peg	scaffold1|size1664507_904562_903588	904562	903588	-	Phospho-N-acetylmuramoyl-pentapeptide-transferase (EC 2.7.8.13)	FIG00000221	icw(5);Peptidoglycan_Biosynthesis
scaffold1|size1664507	fig|6666666.156949.peg.1004	peg	scaffold1|size1664507_906158_904674	906158	904674	-	UDP-N-acetylmuramoylalanyl-D-glutamate--2,6-diaminopimelate ligase (EC 6.3.2.13)	FIG00000243	isu;Peptidoglycan_Biosynthesis icw(1);Peptidoglycan_biosynthesis--gjo isu;Methicillin_resistance_in_Staphylococci
scaffold1|size1664507	fig|6666666.156949.peg.1005	peg	scaffold1|size1664507_908274_906334	908274	906334	-	Cell division protein FtsI [Peptidoglycan synthetase] (EC 2.4.1.129) / Stage V sporulation protein D (Sporulation-specific penicillin-binding protein)	FIG00229585	idu(3);Bacterial_Cell_Division isu;CBSS-83331.1.peg.3039 isu;CBSS-83331.1.peg.3039 idu(3);Flagellum_in_Campylobacter idu(3);Bacterial_Cytoskeleton icw(1);Peptidoglycan_Biosynthesis isu;Sporulation_gene_orphans isu;16S_rRNA_modification_within_P_site_of_ribosome isu;16S_rRNA_modification_within_P_site_of_ribosome
scaffold1|size1664507	fig|6666666.156949.peg.1006	peg	scaffold1|size1664507_910532_908391	910532	908391	-	Penicillin-binding protein 2B	FIG00340321	icw(1);CBSS-83331.1.peg.3039 icw(3);16S_rRNA_modification_within_P_site_of_ribosome
scaffold1|size1664507	fig|6666666.156949.peg.1007	peg	scaffold1|size1664507_910891_910538	910891	910538	-	Cell division protein FtsL	FIG00001060	icw(1);Bacterial_Cell_Division icw(1);Bacterial_Cytoskeleton isu;Stationary_phase_repair_cluster icw(3);16S_rRNA_modification_within_P_site_of_ribosome
scaffold1|size1664507	fig|6666666.156949.peg.1008	peg	scaffold1|size1664507_911866_910931	911866	910931	-	rRNA small subunit methyltransferase H	FIG00000172	icw(2);Bacterial_Cell_Division icw(6);16S_rRNA_modification_within_P_site_of_ribosome
scaffold1|size1664507	fig|6666666.156949.peg.1009	peg	scaffold1|size1664507_912382_911936	912382	911936	-	Cell division protein MraZ	FIG00000547	icw(3);Bacterial_Cell_Division icw(2);Bacterial_Cytoskeleton icw(5);16S_rRNA_modification_within_P_site_of_ribosome
scaffold1|size1664507	fig|6666666.156949.peg.1010	peg	scaffold1|size1664507_914112_912493	914112	912493	-	BH2577 unknown conserved protein in B. subtilis	FIG00011279	icw(1);16S_rRNA_modification_within_P_site_of_ribosome
scaffold1|size1664507	fig|6666666.156949.peg.1011	peg	scaffold1|size1664507_915079_914183	915079	914183	-	2-dehydropantoate 2-reductase (EC 1.1.1.169)	FIG00034973	idu(1);Coenzyme_A_Biosynthesis
scaffold1|size1664507	fig|6666666.156949.peg.1012	peg	scaffold1|size1664507_915239_915721	915239	915721	+	Uncharacterized N-acetyltransferase BT9727_3663 (EC 2.3.1.-)	FIG00003728	isu;16S_rRNA_modification_within_P_site_of_ribosome
scaffold1|size1664507	fig|6666666.156949.peg.1013	peg	scaffold1|size1664507_916359_915778	916359	915778	-	Prespore specific transcriptional activator RsfA	FIG01307797	NA
scaffold1|size1664507	fig|6666666.156949.peg.1014	peg	scaffold1|size1664507_916427_916543	916427	916543	+	hypothetical protein	NA	NA
scaffold1|size1664507	fig|6666666.156949.peg.1015	peg	scaffold1|size1664507_917224_916706	917224	916706	-	COG1399 protein in cluster with ribosomal protein L32p, Firmicutes subfamily	FIG00008125	NA
scaffold1|size1664507	fig|6666666.156949.peg.1016	peg	scaffold1|size1664507_917252_917437	917252	917437	+	FIG01234921: hypothetical protein	FIG01234919	NA
scaffold1|size1664507	fig|6666666.156949.peg.1017	peg	scaffold1|size1664507_917434_918681	917434	918681	+	FIG007079: UPF0348 protein family	FIG00007079	NA
scaffold1|size1664507	fig|6666666.156949.peg.1018	peg	scaffold1|size1664507_919723_918698	919723	918698	-	Lon-like protease with PDZ domain	FIG00051666	isu;Proteasome_bacterial
scaffold1|size1664507	fig|6666666.156949.peg.1019	peg	scaffold1|size1664507_920507_919725	920507	919725	-	Serine protease (EC 3.4.21.-)	FIG01304452	NA
scaffold1|size1664507	fig|6666666.156949.peg.1020	peg	scaffold1|size1664507_920688_921914	920688	921914	+	FIGfam003972: membrane protein	FIG00003972	NA
scaffold1|size1664507	fig|6666666.156949.peg.1021	peg	scaffold1|size1664507_922410_921925	922410	921925	-	Phosphopantetheine adenylyltransferase (EC 2.7.7.3)	FIG00000261	isu;Coenzyme_A_Biosynthesis isu;CBSS-266117.6.peg.1260
scaffold1|size1664507	fig|6666666.156949.peg.1022	peg	scaffold1|size1664507_922969_922415	922969	922415	-	Ribosomal RNA small subunit methyltransferase D (EC 2.1.1.-)	FIG00005547	NA
scaffold1|size1664507	fig|6666666.156949.peg.1023	peg	scaffold1|size1664507_922875_923036	922875	923036	+	hypothetical protein	NA	NA
scaffold1|size1664507	fig|6666666.156949.peg.1024	peg	scaffold1|size1664507_923507_923292	923507	923292	-	hypothetical Cytosolic Protein	FIG01308682	NA
scaffold1|size1664507	fig|6666666.156949.peg.1025	peg	scaffold1|size1664507_924068_923619	924068	923619	-	ComK regulator	FIG00646197	NA
scaffold1|size1664507	fig|6666666.156949.peg.1026	peg	scaffold1|size1664507_924423_924184	924423	924184	-	BH2600 unknown conserved protein in B. subtilis	FIG01320947	NA
scaffold1|size1664507	fig|6666666.156949.peg.1027	peg	scaffold1|size1664507_924837_924439	924837	924439	-	BH2601 unknown conserved protein in B. subtilis	FIG01308426	NA
scaffold1|size1664507	fig|6666666.156949.peg.1028	peg	scaffold1|size1664507_926153_925068	926153	925068	-	Allergen V5/Tpx-1 related	FIG01308181	NA
scaffold1|size1664507	fig|6666666.156949.peg.1029	peg	scaffold1|size1664507_926638_926192	926638	926192	-	CBS domain protein	FIG01301466	NA
scaffold1|size1664507	fig|6666666.156949.peg.1030	peg	scaffold1|size1664507_926778_927140	926778	927140	+	Phenylalanyl-tRNA synthetase alpha subunit	FIG01311589	NA
scaffold1|size1664507	fig|6666666.156949.peg.1031	peg	scaffold1|size1664507_928065_927172	928065	927172	-	CtaG protein	FIG00895178	NA
scaffold1|size1664507	fig|6666666.156949.peg.1032	peg	scaffold1|size1664507_928424_928092	928424	928092	-	Cytochrome c oxidase, subunit IV (EC 1.9.3.1)	FIG00005917	isu;Terminal_cytochrome_C_oxidases
scaffold1|size1664507	fig|6666666.156949.peg.1033	peg	scaffold1|size1664507_929050_928427	929050	928427	-	Cytochrome c oxidase polypeptide III (EC 1.9.3.1)	FIG00000640	isu;CBSS-316057.3.peg.563 icw(1);Terminal_cytochrome_C_oxidases
scaffold1|size1664507	fig|6666666.156949.peg.1034	peg	scaffold1|size1664507_930918_929050	930918	929050	-	Cytochrome c oxidase polypeptide I (EC 1.9.3.1)	FIG00132629	icw(2);Terminal_cytochrome_C_oxidases
scaffold1|size1664507	fig|6666666.156949.peg.1035	peg	scaffold1|size1664507_932021_930951	932021	930951	-	Cytochrome c oxidase polypeptide II (EC 1.9.3.1)	FIG00041887	icw(2);CBSS-316057.3.peg.563 icw(3);Terminal_cytochrome_C_oxidases
scaffold1|size1664507	fig|6666666.156949.peg.1036	peg	scaffold1|size1664507_932219_932106	932219	932106	-	FIG01241795: hypothetical protein	FIG01241794	NA
scaffold1|size1664507	fig|6666666.156949.peg.1037	peg	scaffold1|size1664507_933178_932261	933178	932261	-	Heme O synthase, protoheme IX farnesyltransferase (EC 2.5.1.-) COX10-CtaB	NA	icw(1);CBSS-316057.3.peg.563 icw(1);Biogenesis_of_cytochrome_c_oxidases
scaffold1|size1664507	fig|6666666.156949.peg.1038	peg	scaffold1|size1664507_933384_933536	933384	933536	+	hypothetical protein	NA	NA
scaffold1|size1664507	fig|6666666.156949.peg.1039	peg	scaffold1|size1664507_933533_934453	933533	934453	+	Heme A synthase, cytochrome oxidase biogenesis protein Cox15-CtaA	FIG00000802	isu;Biogenesis_of_cytochrome_c_oxidases
scaffold1|size1664507	fig|6666666.156949.peg.1040	peg	scaffold1|size1664507_938313_934867	938313	934867	-	Pyruvate carboxylase (EC 6.4.1.1)	FIG00001308	NA
scaffold1|size1664507	fig|6666666.156949.peg.1041	peg	scaffold1|size1664507_939455_938388	939455	938388	-	Cell division protein FtsW	FIG00000025	idu(2);Bacterial_Cell_Division idu(2);cell_division_cluster_containing_FtsQ idu(2);Bacterial_Cytoskeleton
scaffold1|size1664507	fig|6666666.156949.peg.1042	peg	scaffold1|size1664507_939454_939570	939454	939570	+	hypothetical protein	NA	NA
scaffold1|size1664507	fig|6666666.156949.peg.1043	peg	scaffold1|size1664507_940086_939805	940086	939805	-	FIG00774243: hypothetical protein YlaN	FIG00774243	NA
scaffold1|size1664507	fig|6666666.156949.peg.1044	peg	scaffold1|size1664507_941113_940184	941113	940184	-	Glutaminase (EC 3.5.1.2)	FIG00001174	idu(1);Glutamine,_Glutamate,_Aspartate_and_Asparagine_Biosynthesis
scaffold1|size1664507	fig|6666666.156949.peg.1045	peg	scaffold1|size1664507_941216_941701	941216	941701	+	FIG01108239: hypothetical protein	FIG01226511	NA
scaffold1|size1664507	fig|6666666.156949.peg.1046	peg	scaffold1|size1664507_943032_941704	943032	941704	-	Predicted ATPase related to phosphate starvation-inducible protein PhoH	FIG00075426	isu;Phosphate_metabolism
scaffold1|size1664507	fig|6666666.156949.peg.1047	peg	scaffold1|size1664507_943187_943816	943187	943816	+	Phosphonate ABC transporter phosphate-binding periplasmic component (TC 3.A.1.9.1)	FIG00014764	idu(2);ABC_transporter_alkylphosphonate_(TC_3.A.1.9.1)
scaffold1|size1664507	fig|6666666.156949.peg.1048	peg	scaffold1|size1664507_943902_944108	943902	944108	+	FIG01225604: hypothetical protein	FIG01225603	NA
scaffold1|size1664507	fig|6666666.156949.peg.1049	peg	scaffold1|size1664507_944481_944164	944481	944164	-	FIG01225318: hypothetical protein	FIG01225317	NA
scaffold1|size1664507	fig|6666666.156949.peg.1050	peg	scaffold1|size1664507_946376_944538	946376	944538	-	GTP-binding protein TypA/BipA	FIG00000268	isu;Universal_GTPases
scaffold1|size1664507	fig|6666666.156949.peg.1051	peg	scaffold1|size1664507_946489_946677	946489	946677	+	FIG01226072: hypothetical protein	FIG01226071	NA
scaffold1|size1664507	fig|6666666.156949.peg.1052	peg	scaffold1|size1664507_946949_947560	946949	947560	+	FIG01228394: hypothetical protein	FIG01228393	NA
scaffold1|size1664507	fig|6666666.156949.peg.1053	peg	scaffold1|size1664507_947893_947600	947893	947600	-	hypothetical protein	NA	NA
scaffold1|size1664507	fig|6666666.156949.peg.1054	peg	scaffold1|size1664507_948411_948019,scaffold1|size1664507_948015_947890	948411	947890	-	RNA polymerase sigma factor RpoE	FIG00000973	isu;Transcription_initiation,_bacterial_sigma_factors
scaffold1|size1664507	fig|6666666.156949.peg.1055	peg	scaffold1|size1664507_948680_948411	948680	948411	-	unknown	NA	NA
scaffold1|size1664507	fig|6666666.156949.peg.1056	peg	scaffold1|size1664507_950598_948670	950598	948670	-	unknown	NA	NA
scaffold1|size1664507	fig|6666666.156949.peg.1057	peg	scaffold1|size1664507_950895_952460	950895	952460	+	Zinc metalloproteinase precursor (EC 3.4.24.29) / aureolysin	NA	idu(1);Listeria_Pathogenicity_Island_LIPI-1_extended
scaffold1|size1664507	fig|6666666.156949.peg.1058	peg	scaffold1|size1664507_952559_952993	952559	952993	+	Rrf2 family transcriptional regulator, group III	FIG00001194	idu(1);Rrf2_family_transcriptional_regulators
scaffold1|size1664507	fig|6666666.156949.peg.1059	peg	scaffold1|size1664507_953069_953971	953069	953971	+	probable lipase/esterase	FIG01567901	NA
scaffold1|size1664507	fig|6666666.156949.peg.1060	peg	scaffold1|size1664507_954112_955026	954112	955026	+	O-Methyltransferase involved in polyketide biosynthesis	FIG01313020	NA
scaffold1|size1664507	fig|6666666.156949.peg.1061	peg	scaffold1|size1664507_955532_955104	955532	955104	-	unknown	NA	NA
scaffold1|size1664507	fig|6666666.156949.peg.1062	peg	scaffold1|size1664507_956355_955558	956355	955558	-	Inositol-1-monophosphatase (EC 3.1.3.25)	FIG00002332	isu;Di-Inositol-Phosphate_biosynthesis icw(1);CBSS-1313.3.peg.147
scaffold1|size1664507	fig|6666666.156949.peg.1063	peg	scaffold1|size1664507_956740_956495	956740	956495	-	FIG01225394: hypothetical protein	FIG01225393	NA
scaffold1|size1664507	fig|6666666.156949.peg.1064	peg	scaffold1|size1664507_956923_957561	956923	957561	+	FIG01108286: hypothetical protein	FIG01225125	NA
scaffold1|size1664507	fig|6666666.156949.peg.1065	peg	scaffold1|size1664507_957860_957594	957860	957594	-	FIG006438: hypothetical protein	FIG00006438	isu;CBSS-1313.3.peg.147
scaffold1|size1664507	fig|6666666.156949.peg.1066	peg	scaffold1|size1664507_958045_959517	958045	959517	+	Arginine decarboxylase (EC 4.1.1.19)	FIG00016145	idu(1);Arginine_and_Ornithine_Degradation idu(1);Polyamine_Metabolism
scaffold1|size1664507	fig|6666666.156949.peg.1067	peg	scaffold1|size1664507_959690_959571	959690	959571	-	hypothetical protein	NA	NA
scaffold1|size1664507	fig|6666666.156949.peg.1068	peg	scaffold1|size1664507_960109_960483	960109	960483	+	small peptidoglycan-associated lipoprotein	FIG01325148	NA
scaffold1|size1664507	fig|6666666.156949.peg.1069	peg	scaffold1|size1664507_961940_960528	961940	960528	-	Dihydrolipoamide dehydrogenase of pyruvate dehydrogenase complex (EC 1.8.1.4)	FIG01303880	isu;TCA_Cycle isu;Pyruvate_metabolism_II:_acetyl-CoA,_acetogenesis_from_pyruvate
scaffold1|size1664507	fig|6666666.156949.peg.1070	peg	scaffold1|size1664507_963273_961945	963273	961945	-	Dihydrolipoamide acetyltransferase component of pyruvate dehydrogenase complex (EC 2.3.1.12)	FIG00136675	icw(2);Dehydrogenase_complexes isu;5-FCL-like_protein icw(3);Pyruvate_metabolism_II:_acetyl-CoA,_acetogenesis_from_pyruvate
scaffold1|size1664507	fig|6666666.156949.peg.1071	peg	scaffold1|size1664507_964365_963388	964365	963388	-	Pyruvate dehydrogenase E1 component beta subunit (EC 1.2.4.1)	FIG00025527	icw(1);Dehydrogenase_complexes icw(2);Pyruvate_metabolism_II:_acetyl-CoA,_acetogenesis_from_pyruvate
scaffold1|size1664507	fig|6666666.156949.peg.1072	peg	scaffold1|size1664507_965484_964369	965484	964369	-	Pyruvate dehydrogenase E1 component alpha subunit (EC 1.2.4.1)	FIG00053889	isu;Dehydrogenase_complexes icw(1);Pyruvate_metabolism_II:_acetyl-CoA,_acetogenesis_from_pyruvate
scaffold1|size1664507	fig|6666666.156949.peg.1073	peg	scaffold1|size1664507_966579_965908	966579	965908	-	Phosphonate ABC transporter phosphate-binding periplasmic component (TC 3.A.1.9.1)	FIG00014764	idu(2);ABC_transporter_alkylphosphonate_(TC_3.A.1.9.1)
scaffold1|size1664507	fig|6666666.156949.peg.1074	peg	scaffold1|size1664507_966793_966951	966793	966951	+	hypothetical protein	NA	NA
scaffold1|size1664507	fig|6666666.156949.peg.1075	peg	scaffold1|size1664507_967061_967615	967061	967615	+	Peptide deformylase (EC 3.5.1.88)	FIG00000017	icw(1);Bacterial_RNA-metabolizing_Zn-dependent_hydrolases idu(1);Conserved_gene_cluster_associated_with_Met-tRNA_formyltransferase idu(1);CBSS-89187.3.peg.2957 idu(1);Translation_termination_factors_bacterial
scaffold1|size1664507	fig|6666666.156949.peg.1076	peg	scaffold1|size1664507_968424_967651	968424	967651	-	Hydrolase (HAD superfamily) in cluster with DUF1447	FIG00003535	isu;Bacterial_RNA-metabolizing_Zn-dependent_hydrolases icw(2);Conserved_gene_cluster_associated_with_Met-tRNA_formyltransferase isu;Queuosine-Archaeosine_Biosynthesis
scaffold1|size1664507	fig|6666666.156949.peg.1077	peg	scaffold1|size1664507_968786_968646	968786	968646	-	hypothetical protein	NA	NA
scaffold1|size1664507	fig|6666666.156949.peg.1078	peg	scaffold1|size1664507_968811_969020	968811	969020	+	Protein of unknown function DUF1447	FIG00001611	icw(4);Bacterial_RNA-metabolizing_Zn-dependent_hydrolases icw(1);Conserved_gene_cluster_associated_with_Met-tRNA_formyltransferase
scaffold1|size1664507	fig|6666666.156949.peg.1079	peg	scaffold1|size1664507_969026_970693	969026	970693	+	Ribonuclease J1 (endonuclease and 5' exonuclease)	FIG00060571	icw(3);Bacterial_RNA-metabolizing_Zn-dependent_hydrolases isu;Ribonucleases_in_Bacillus
scaffold1|size1664507	fig|6666666.156949.peg.1080	peg	scaffold1|size1664507_972460_970727	972460	970727	-	Adenine deaminase (EC 3.5.4.2)	FIG00001522	idu(1);Purine_conversions
scaffold1|size1664507	fig|6666666.156949.peg.1081	peg	scaffold1|size1664507_973281_972616	973281	972616	-	Trk system potassium uptake protein TrkA	FIG00000838	icw(1);Bacterial_RNA-metabolizing_Zn-dependent_hydrolases idu(1);Hyperosmotic_potassium_uptake icw(2);Conserved_gene_cluster_associated_with_Met-tRNA_formyltransferase idu(1);Potassium_homeostasis
scaffold1|size1664507	fig|6666666.156949.peg.1082	peg	scaffold1|size1664507_974171_973344	974171	973344	-	FIG01231010: hypothetical protein	FIG01231009	NA
scaffold1|size1664507	fig|6666666.156949.peg.1083	peg	scaffold1|size1664507_975473_974187	975473	974187	-	Sporulation kinase C (EC 2.7.13.3)	FIG00149214	isu;Sporulation_gene_orphans
scaffold1|size1664507	fig|6666666.156949.peg.1084	peg	scaffold1|size1664507_975941_975663	975941	975663	-	Putative transition state regulator Abh	FIG00116582	isu;Poly-gamma-glutamate_biosynthesis
scaffold1|size1664507	fig|6666666.156949.peg.1085	peg	scaffold1|size1664507_976213_977232	976213	977232	+	Cell-shape determining protein MreBH	FIG00132888	isu;Bacterial_Cytoskeleton
scaffold1|size1664507	fig|6666666.156949.peg.1086	peg	scaffold1|size1664507_977333_977467	977333	977467	+	hypothetical protein	NA	NA
scaffold1|size1664507	fig|6666666.156949.peg.1087	peg	scaffold1|size1664507_977576_978808	977576	978808	+	Aminopeptidase S (Leu, Val, Phe, Tyr preference) (EC 3.4.11.24)	FIG00044735	isu;Aminopeptidases_(EC_3.4.11.-)
scaffold1|size1664507	fig|6666666.156949.peg.1088	peg	scaffold1|size1664507_979753_978842	979753	978842	-	2-dehydropantoate 2-reductase (EC 1.1.1.169)	FIG00034973	idu(1);Coenzyme_A_Biosynthesis
scaffold1|size1664507	fig|6666666.156949.peg.1089	peg	scaffold1|size1664507_981433_979811	981433	979811	-	ABC transporter, ATP-binding protein	FIG00744535	NA
scaffold1|size1664507	fig|6666666.156949.peg.1090	peg	scaffold1|size1664507_981614_981883	981614	981883	+	hypothetical protein	NA	NA
scaffold1|size1664507	fig|6666666.156949.peg.1091	peg	scaffold1|size1664507_982498_981917	982498	981917	-	Signal peptidase I (EC 3.4.21.89)	FIG00000015	idu(3);Signal_peptidase idu(3);CBSS-176299.4.peg.1292
scaffold1|size1664507	fig|6666666.156949.peg.1092	peg	scaffold1|size1664507_984550_982643	984550	982643	-	PTS system, fructose-specific IIA component (EC 2.7.1.69) / PTS system, fructose-specific IIB component (EC 2.7.1.69) / PTS system, fructose-specific IIC component (EC 2.7.1.69)	FIG00001234	isu;Fructose_utilization isu;Fructose_utilization isu;Fructose_utilization
scaffold1|size1664507	fig|6666666.156949.peg.1093	peg	scaffold1|size1664507_985476_984565	985476	984565	-	Tagatose-6-phosphate kinase (EC 2.7.1.144) / 1-phosphofructokinase (EC 2.7.1.56)	FIG00460883	isu;Lactose_and_Galactose_Uptake_and_Utilization isu;D-Tagatose_and_Galactitol_Utilization icw(2);Fructose_utilization
scaffold1|size1664507	fig|6666666.156949.peg.1094	peg	scaffold1|size1664507_986228_985473	986228	985473	-	Transcriptional repressor of the fructose operon, DeoR family	FIG00001452	icw(1);Fructose_utilization
scaffold1|size1664507	fig|6666666.156949.peg.1095	peg	scaffold1|size1664507_987701_986508	987701	986508	-	ABC transporter, ATP-binding protein	FIG00744535	NA
scaffold1|size1664507	fig|6666666.156949.peg.1096	peg	scaffold1|size1664507_988390_987698	988390	987698	-	ABC transporter ATP-binding protein YvcR	FIG00007923	idu(3);Bacitracin_Stress_Response
scaffold1|size1664507	fig|6666666.156949.peg.1097	peg	scaffold1|size1664507_989524_988391	989524	988391	-	periplasmic component of efflux system	NA	NA
scaffold1|size1664507	fig|6666666.156949.peg.1098	peg	scaffold1|size1664507_990224_989529	990224	989529	-	hypothetical Membrane Spanning Protein	NA	NA
scaffold1|size1664507	fig|6666666.156949.peg.1099	peg	scaffold1|size1664507_992148_990334	992148	990334	-	Lipid A export ATP-binding/permease protein MsbA	FIG00017059	NA
scaffold1|size1664507	fig|6666666.156949.peg.1100	peg	scaffold1|size1664507_993917_992160	993917	992160	-	Lipid A export ATP-binding/permease protein MsbA	FIG00017059	NA
scaffold1|size1664507	fig|6666666.156949.peg.1101	peg	scaffold1|size1664507_994374_994141	994374	994141	-	Molybdenum cofactor biosynthesis protein MoaD	FIG00003839	isu;ar-104-EC_Molybdenum_cofactor_biosynthesis_moaABCDE icw(3);Molybdenum_cofactor_biosynthesis
scaffold1|size1664507	fig|6666666.156949.peg.1102	peg	scaffold1|size1664507_994840_994367	994840	994367	-	Molybdenum cofactor biosynthesis protein MoaE	FIG00018405	icw(1);ar-104-EC_Molybdenum_cofactor_biosynthesis_moaABCDE isu;Molybdenum_cofactor_biosynthesis
scaffold1|size1664507	fig|6666666.156949.peg.1103	peg	scaffold1|size1664507_995361_994840	995361	994840	-	Molybdopterin-guanine dinucleotide biosynthesis protein MobB	FIG00001323	icw(1);ar-431-EC_Molybdopterin-guanine_dinucleotide_biosynthesis icw(4);Molybdenum_cofactor_biosynthesis
scaffold1|size1664507	fig|6666666.156949.peg.1104	peg	scaffold1|size1664507_996614_995322	996614	995322	-	Molybdopterin biosynthesis protein MoeA	FIG00018218	icw(1);Molybdenum_cofactor_biosynthesis
scaffold1|size1664507	fig|6666666.156949.peg.1105	peg	scaffold1|size1664507_997651_996632	997651	996632	-	Molybdopterin biosynthesis protein MoeB	FIG00001230	icw(5);Molybdenum_cofactor_biosynthesis
scaffold1|size1664507	fig|6666666.156949.peg.1106	peg	scaffold1|size1664507_998301_997702	998301	997702	-	Molybdopterin-guanine dinucleotide biosynthesis protein MobA	FIG00000902	isu;ar-431-EC_Molybdopterin-guanine_dinucleotide_biosynthesis icw(2);Molybdenum_cofactor_biosynthesis
scaffold1|size1664507	fig|6666666.156949.peg.1107	peg	scaffold1|size1664507_998438_999403	998438	999403	+	Sporulation protein Cse15	FIG01380954	NA
scaffold1|size1664507	fig|6666666.156949.peg.1108	peg	scaffold1|size1664507_1000028_999444	1000028	999444	-	unknown	NA	NA
scaffold1|size1664507	fig|6666666.156949.peg.1109	peg	scaffold1|size1664507_1000346_1000459	1000346	1000459	+	hypothetical protein	NA	NA
scaffold1|size1664507	fig|6666666.156949.peg.1110	peg	scaffold1|size1664507_1000940_1000494	1000940	1000494	-	FIG01225483: hypothetical protein	FIG01225482	NA
scaffold1|size1664507	fig|6666666.156949.peg.1111	peg	scaffold1|size1664507_1001552_1001010	1001552	1001010	-	Alkyl hydroperoxide reductase subunit C-like protein	FIG01258694	isu;Oxidative_stress isu;Rubrerythrin isu;Thioredoxin-disulfide_reductase
scaffold1|size1664507	fig|6666666.156949.peg.1112	peg	scaffold1|size1664507_1001789_1002592	1001789	1002592	+	Potassium efflux system KefA protein / Small-conductance mechanosensitive channel	NA	idu(1);Potassium_homeostasis
scaffold1|size1664507	fig|6666666.156949.peg.1113	peg	scaffold1|size1664507_1002874_1002629	1002874	1002629	-	FIG01227039: hypothetical protein	FIG01227038	NA
scaffold1|size1664507	fig|6666666.156949.peg.1114	peg	scaffold1|size1664507_1004060_1002936	1004060	1002936	-	N-acetyl-L,L-diaminopimelate deacetylase (EC 3.5.1.47)	FIG00016846	idu(1);Lysine_Biosynthesis_DAP_Pathway idu(1);Lysine_Biosynthesis_DAP_Pathway,_GJO_scratch
scaffold1|size1664507	fig|6666666.156949.peg.1115	peg	scaffold1|size1664507_1004840_1004130	1004840	1004130	-	2,3,4,5-tetrahydropyridine-2,6-dicarboxylate N-acetyltransferase (EC 2.3.1.89)	FIG00001821	icw(1);Lysine_Biosynthesis_DAP_Pathway icw(1);Lysine_Biosynthesis_DAP_Pathway,_GJO_scratch
scaffold1|size1664507	fig|6666666.156949.peg.1116	peg	scaffold1|size1664507_1005400_1004960,scaffold1|size1664507_1004960_1004865	1005400	1004865	-	Flavodoxin	FIG00010844	idu(1);Flavodoxin
scaffold1|size1664507	fig|6666666.156949.peg.1117	peg	scaffold1|size1664507_1006309_1005416	1006309	1005416	-	unknown	NA	NA
scaffold1|size1664507	fig|6666666.156949.peg.1118	peg	scaffold1|size1664507_1006775_1006299	1006775	1006299	-	Flavodoxin	FIG00010844	idu(1);Flavodoxin
scaffold1|size1664507	fig|6666666.156949.peg.1119	peg	scaffold1|size1664507_1007767_1006886	1007767	1006886	-	Cys regulon transcriptional activator CysB	FIG00896278	isu;LysR-family_proteins_in_Escherichia_coli isu;Cysteine_Biosynthesis
scaffold1|size1664507	fig|6666666.156949.peg.1120	peg	scaffold1|size1664507_1008356_1007913	1008356	1007913	-	Inosine-5'-monophosphate dehydrogenase (EC 1.1.1.205)	FIG00020613	idu(1);Purine_conversions idu(1);Purine_salvage_cluster
scaffold1|size1664507	fig|6666666.156949.peg.1121	peg	scaffold1|size1664507_1008685_1008494	1008685	1008494	-	FIG01227021: hypothetical protein	FIG01227020	NA
scaffold1|size1664507	fig|6666666.156949.peg.1122	peg	scaffold1|size1664507_1009343_1008825	1009343	1008825	-	DUF458 domain-containing protein	FIG01322759	NA
scaffold1|size1664507	fig|6666666.156949.peg.1123	peg	scaffold1|size1664507_1009692_1009453	1009692	1009453	-	FIG01228827: hypothetical protein	FIG01228826	NA
scaffold1|size1664507	fig|6666666.156949.peg.1124	peg	scaffold1|size1664507_1009932_1009810	1009932	1009810	-	FIG01245340: hypothetical protein	FIG01245338	NA
scaffold1|size1664507	fig|6666666.156949.peg.1125	peg	scaffold1|size1664507_1011534_1010311	1011534	1010311	-	EAL-domain protein	FIG01227205	NA
scaffold1|size1664507	fig|6666666.156949.peg.1126	peg	scaffold1|size1664507_1012362_1011598	1012362	1011598	-	Glucose 1-dehydrogenase (EC 1.1.1.47)	FIG00009828	idu(2);Entner-Doudoroff_Pathway idu(2);D-gluconate_and_ketogluconates_metabolism
scaffold1|size1664507	fig|6666666.156949.peg.1127	peg	scaffold1|size1664507_1012505_1013365	1012505	1013365	+	Ser/Thr protein phosphatase family protein	FIG01315156	NA
scaffold1|size1664507	fig|6666666.156949.peg.1128	peg	scaffold1|size1664507_1013413_1013916	1013413	1013916	+	Protein erfK/srfK precursor	FIG01344423	NA
scaffold1|size1664507	fig|6666666.156949.peg.1129	peg	scaffold1|size1664507_1013992_1015284	1013992	1015284	+	Macrolide-efflux protein	FIG01231596	NA
scaffold1|size1664507	fig|6666666.156949.peg.1130	peg	scaffold1|size1664507_1015410_1015874	1015410	1015874	+	FIG01226255: hypothetical protein	FIG01226254	NA
scaffold1|size1664507	fig|6666666.156949.peg.1131	peg	scaffold1|size1664507_1016802_1015918	1016802	1015918	-	Chemotaxis protein CheV (EC 2.7.3.-)	FIG00007041	isu;Flagellar_motility isu;Bacterial_Chemotaxis
scaffold1|size1664507	fig|6666666.156949.peg.1132	peg	scaffold1|size1664507_1017034_1017195	1017034	1017195	+	FIG01233382: hypothetical protein	FIG01233381	NA
scaffold1|size1664507	fig|6666666.156949.peg.1133	peg	scaffold1|size1664507_1017397_1018578	1017397	1018578	+	N-acetyl-L,L-diaminopimelate aminotransferase (EC 2.6.1.-)	FIG00054354	isu;Lysine_Biosynthesis_DAP_Pathway isu;Lysine_Biosynthesis_DAP_Pathway,_GJO_scratch
scaffold1|size1664507	fig|6666666.156949.peg.1134	peg	scaffold1|size1664507_1020408_1018588	1020408	1018588	-	Sporulation kinase A (EC 2.7.13.3)	FIG01236287	isu;Sporulation_gene_orphans
scaffold1|size1664507	fig|6666666.156949.peg.1135	peg	scaffold1|size1664507_1022692_1020572	1022692	1020572	-	Cell division protein FtsI [Peptidoglycan synthetase] (EC 2.4.1.129) / Transpeptidase, Penicillin binding protein transpeptidase domain	FIG00012378	idu(3);Bacterial_Cell_Division idu(3);CBSS-83331.1.peg.3039 idu(3);Flagellum_in_Campylobacter idu(3);Bacterial_Cytoskeleton idu(3);Peptidoglycan_Biosynthesis idu(3);16S_rRNA_modification_within_P_site_of_ribosome
scaffold1|size1664507	fig|6666666.156949.peg.1136	peg	scaffold1|size1664507_1023029_1023802	1023029	1023802	+	FIG01228050: hypothetical protein	FIG01228049	NA
scaffold1|size1664507	fig|6666666.156949.peg.1137	peg	scaffold1|size1664507_1024014_1023883	1024014	1023883	-	hypothetical protein	NA	NA
scaffold1|size1664507	fig|6666666.156949.peg.1138	peg	scaffold1|size1664507_1025029_1024139	1025029	1024139	-	putative antibiotic hydrolase	FIG01242353	NA
scaffold1|size1664507	fig|6666666.156949.peg.1139	peg	scaffold1|size1664507_1026289_1025423	1026289	1025423	-	2-hydroxy-3-oxopropionate reductase (EC 1.1.1.60)	FIG00133229	idu(1);Glycerate_metabolism idu(1);Allantoin_Utilization idu(1);D-galactarate,_D-glucarate_and_D-glycerate_catabolism idu(1);D-galactarate,_D-glucarate_and_D-glycerate_catabolism_-_gjo
scaffold1|size1664507	fig|6666666.156949.peg.1140	peg	scaffold1|size1664507_1028394_1026427	1028394	1026427	-	methyl-accepting chemotaxis protein	FIG01251342	NA
scaffold1|size1664507	fig|6666666.156949.peg.1141	peg	scaffold1|size1664507_1028529_1029230	1028529	1029230	+	FIG01227912: hypothetical protein	FIG01227911	NA
scaffold1|size1664507	fig|6666666.156949.peg.1142	peg	scaffold1|size1664507_1030251_1029223	1030251	1029223	-	Spore photoproduct lyase (EC 4.1.99.-)	FIG01315921	NA
scaffold1|size1664507	fig|6666666.156949.peg.1143	peg	scaffold1|size1664507_1030568_1030329	1030568	1030329	-	Transcriptional regulator splA	FIG01226002	NA
scaffold1|size1664507	fig|6666666.156949.peg.1144	peg	scaffold1|size1664507_1032371_1030659	1032371	1030659	-	Phosphoenolpyruvate-protein phosphotransferase of PTS system (EC 2.7.3.9)	FIG00028694	isu;Fructose_utilization isu;Mannitol_Utilization
scaffold1|size1664507	fig|6666666.156949.peg.1145	peg	scaffold1|size1664507_1032637_1032371	1032637	1032371	-	Phosphocarrier protein of PTS system	FIG00000809	NA
scaffold1|size1664507	fig|6666666.156949.peg.1146	peg	scaffold1|size1664507_1034834_1032735	1034834	1032735	-	PTS system, glucose-specific IIC component / PTS system, glucose-specific IIB component (EC 2.7.1.69) / PTS system, glucose-specific IIA component	FIG01962672	idu(1);Trehalose_Uptake_and_Utilization
scaffold1|size1664507	fig|6666666.156949.peg.1147	peg	scaffold1|size1664507_1035929_1035063	1035929	1035063	-	Beta-glucoside bgl operon antiterminator, BglG family	FIG00001011	idu(2);Beta-Glucoside_Metabolism
scaffold1|size1664507	fig|6666666.156949.peg.1148	peg	scaffold1|size1664507_1036957_1035992	1036957	1035992	-	sugar-binding transcriptional regulator, LacI family	FIG01288647	NA
scaffold1|size1664507	fig|6666666.156949.peg.1149	peg	scaffold1|size1664507_1037064_1037189	1037064	1037189	+	hypothetical protein	NA	NA
scaffold1|size1664507	fig|6666666.156949.peg.1150	peg	scaffold1|size1664507_1038334_1037240	1038334	1037240	-	Proline dipeptidase (EC 3.4.13.9)	FIG00003427	isu;CBSS-269801.1.peg.809
scaffold1|size1664507	fig|6666666.156949.peg.1151	peg	scaffold1|size1664507_1038500_1038703	1038500	1038703	+	FIG01241095: hypothetical protein	FIG01241094	NA
scaffold1|size1664507	fig|6666666.156949.peg.1152	peg	scaffold1|size1664507_1040654_1038741	1040654	1038741	-	Lead, cadmium, zinc and mercury transporting ATPase (EC 3.6.3.3) (EC 3.6.3.5); Copper-translocating P-type ATPase (EC 3.6.3.4)	NA	idu(2);Copper_homeostasis idu(2);Copper_Transport_System
scaffold1|size1664507	fig|6666666.156949.peg.1153	peg	scaffold1|size1664507_1041387_1040890	1041387	1040890	-	Thiol:disulfide oxidoreductase related to ResA	NA	idu(1);Biogenesis_of_c-type_cytochromes idu(1);CBSS-196164.1.peg.461
scaffold1|size1664507	fig|6666666.156949.peg.1154	peg	scaffold1|size1664507_1042775_1041438	1042775	1041438	-	Stage V sporulation protein B	FIG00002090	idu(2);Sporulation_gene_orphans
scaffold1|size1664507	fig|6666666.156949.peg.1155	peg	scaffold1|size1664507_1043519_1042893	1043519	1042893	-	Uncharacterized protein YkvT, NOT involved in spore germination	FIG00144902	isu;Spore_germination
scaffold1|size1664507	fig|6666666.156949.peg.1156	peg	scaffold1|size1664507_1044015_1043818	1044015	1043818	-	FIG01235582: hypothetical protein	FIG01235580	NA
scaffold1|size1664507	fig|6666666.156949.peg.1157	peg	scaffold1|size1664507_1044178_1044363	1044178	1044363	+	FIG01225871: hypothetical protein	FIG01225870	NA
scaffold1|size1664507	fig|6666666.156949.peg.1158	peg	scaffold1|size1664507_1044774_1044484	1044774	1044484	-	conserved hypothetical protein	FIG00629156	NA
scaffold1|size1664507	fig|6666666.156949.peg.1159	peg	scaffold1|size1664507_1045013_1044882	1045013	1044882	-	hypothetical protein	NA	NA
scaffold1|size1664507	fig|6666666.156949.peg.1160	peg	scaffold1|size1664507_1046444_1045509	1046444	1045509	-	Membrane-bound lytic murein transglycosylase D precursor (EC 3.2.1.-)	FIG00008294	idu(1);Murein_Hydrolases
scaffold1|size1664507	fig|6666666.156949.peg.1161	peg	scaffold1|size1664507_1046768_1046541	1046768	1046541	-	FIG01232938: hypothetical protein	FIG01388347	NA
scaffold1|size1664507	fig|6666666.156949.peg.1162	peg	scaffold1|size1664507_1047983_1046784	1047983	1046784	-	Spore protein YkvP	FIG01357710	NA
scaffold1|size1664507	fig|6666666.156949.peg.1163	peg	scaffold1|size1664507_1049210_1048464	1049210	1048464	-	3-oxoacyl-[acyl-carrier protein] reductase (EC 1.1.1.100)	FIG00621114	idu(6);CBSS-246196.1.peg.364 idu(6);Fatty_Acid_Biosynthesis_FASII
scaffold1|size1664507	fig|6666666.156949.peg.1164	peg	scaffold1|size1664507_1049379_1049735	1049379	1049735	+	Transcriptional regulator, HxlR family	FIG00906075	NA
scaffold1|size1664507	fig|6666666.156949.peg.1165	peg	scaffold1|size1664507_1050793_1050296	1050793	1050296	-	NADPH dependent preQ0 reductase (EC 1.7.1.13)	FIG00001032	NA
scaffold1|size1664507	fig|6666666.156949.peg.1166	peg	scaffold1|size1664507_1051542_1050811	1051542	1050811	-	Queuosine Biosynthesis QueE Radical SAM	FIG00000490	icw(1);tRNA_modification_Bacteria icw(1);Queuosine-Archaeosine_Biosynthesis
scaffold1|size1664507	fig|6666666.156949.peg.1167	peg	scaffold1|size1664507_1051975_1051535	1051975	1051535	-	6-carboxytetrahydropterin synthase (EC 4.1.2.50) @ Queuosine biosynthesis QueD, PTPS-I	FIG00138171	icw(2);tRNA_modification_Bacteria isu;Zinc_regulated_enzymes isu;Queuosine-Archaeosine_Biosynthesis
scaffold1|size1664507	fig|6666666.156949.peg.1168	peg	scaffold1|size1664507_1052636_1051977	1052636	1051977	-	Queuosine Biosynthesis QueC ATPase	FIG00000491	isu;tRNA_modification_Bacteria icw(2);Queuosine-Archaeosine_Biosynthesis
scaffold1|size1664507	fig|6666666.156949.peg.1169	peg	scaffold1|size1664507_1053992_1052949	1053992	1052949	-	membrane protein, putative	FIG00439698	NA
scaffold1|size1664507	fig|6666666.156949.peg.1170	peg	scaffold1|size1664507_1054486_1056456	1054486	1056456	+	ClpB protein	FIG00025216	isu;Proteolysis_in_bacteria,_ATP-dependent isu;Type_VI_secretion_systems isu;USS-DB-7 isu;Protein_chaperones
scaffold1|size1664507	fig|6666666.156949.peg.1171	peg	scaffold1|size1664507_1056839_1057651	1056839	1057651	+	Flagellar motor rotation protein MotA	FIG00000438	icw(1);Flagellar_motility icw(1);Flagellum
scaffold1|size1664507	fig|6666666.156949.peg.1172	peg	scaffold1|size1664507_1057623_1058408	1057623	1058408	+	Flagellar motor rotation protein MotB	FIG00025360	idu(1);Flagellar_motility idu(1);Flagellum idu(1);CBSS-323098.3.peg.2823
scaffold1|size1664507	fig|6666666.156949.peg.1173	peg	scaffold1|size1664507_1058885_1058448	1058885	1058448	-	Transcriptional regulator, MarR family	FIG00554610	NA
scaffold1|size1664507	fig|6666666.156949.peg.1174	peg	scaffold1|size1664507_1058870_1058983	1058870	1058983	+	hypothetical protein	NA	NA
scaffold1|size1664507	fig|6666666.156949.peg.1175	peg	scaffold1|size1664507_1059096_1060598	1059096	1060598	+	sensor histidine kinase KinD	FIG01343651	NA
scaffold1|size1664507	fig|6666666.156949.peg.1176	peg	scaffold1|size1664507_1061057_1060626	1061057	1060626	-	small membrane protein	FIG01497856	NA
scaffold1|size1664507	fig|6666666.156949.peg.1177	peg	scaffold1|size1664507_1061400_1061143	1061400	1061143	-	Spo0E regulatory protein, specific dephosphorylation of Spo0A-P (stage 0 sporulation)	FIG01235387	NA
scaffold1|size1664507	fig|6666666.156949.peg.1178	peg	scaffold1|size1664507_1061603_1061923	1061603	1061923	+	DUF1232 domain-containing protein	NA	NA
scaffold1|size1664507	fig|6666666.156949.peg.1179	peg	scaffold1|size1664507_1062500_1061964	1062500	1061964	-	1,2-dihydroxy-3-keto-5-methylthiopentene dioxygenase (EC 1.13.11.54)	FIG00002107	icw(2);Methionine_Salvage
scaffold1|size1664507	fig|6666666.156949.peg.1180	peg	scaffold1|size1664507_1063809_1063126,scaffold1|size1664507_1063126_1062515	1063809	1062515	-	Methylthioribulose-1-phosphate dehydratase (EC 4.2.1.109)	FIG00002176	isu;Methionine_Salvage
scaffold1|size1664507	fig|6666666.156949.peg.1181	peg	scaffold1|size1664507_1065050_1063806	1065050	1063806	-	2,3-diketo-5-methylthiopentyl-1-phosphate enolase (EC 5.3.2.5)	FIG00003645	icw(3);Methionine_Salvage
scaffold1|size1664507	fig|6666666.156949.peg.1182	peg	scaffold1|size1664507_1066443_1065247	1066443	1065247	-	Glutamine-dependent 2-keto-4-methylthiobutyrate transaminase	FIG00003232	isu;Methionine_Salvage
scaffold1|size1664507	fig|6666666.156949.peg.1183	peg	scaffold1|size1664507_1066538_1067317	1066538	1067317	+	Aliphatic amidase AmiE (EC 3.5.1.4)	FIG01324097	NA
scaffold1|size1664507	fig|6666666.156949.peg.1184	peg	scaffold1|size1664507_1067647_1068843	1067647	1068843	+	5-methylthioribose kinase (EC 2.7.1.100)	FIG00097608	icw(1);Methionine_Salvage
scaffold1|size1664507	fig|6666666.156949.peg.1185	peg	scaffold1|size1664507_1068851_1069912	1068851	1069912	+	Methylthioribose-1-phosphate isomerase (EC 5.3.1.23)	FIG00001494	icw(2);Methionine_Salvage
scaffold1|size1664507	fig|6666666.156949.peg.1186	peg	scaffold1|size1664507_1070071_1069946	1070071	1069946	-	hypothetical protein	NA	NA
scaffold1|size1664507	fig|6666666.156949.peg.1187	peg	scaffold1|size1664507_1070658_1070161	1070658	1070161	-	Methylated-DNA--protein-cysteine methyltransferase (EC 2.1.1.63)	FIG00000328	idu(1);DNA_repair,_bacterial idu(1);CBSS-393124.3.peg.2657
scaffold1|size1664507	fig|6666666.156949.peg.1188	peg	scaffold1|size1664507_1072871_1070655	1072871	1070655	-	Two-component sensor histidine kinase	FIG01332169	NA
scaffold1|size1664507	fig|6666666.156949.peg.1189	peg	scaffold1|size1664507_1073097_1074146	1073097	1074146	+	membrane protein, putative	FIG00439698	NA
scaffold1|size1664507	fig|6666666.156949.peg.1190	peg	scaffold1|size1664507_1074370_1074188	1074370	1074188	-	unknown	NA	NA
scaffold1|size1664507	fig|6666666.156949.peg.1191	peg	scaffold1|size1664507_1074528_1074373	1074528	1074373	-	FIG01233072: hypothetical protein	FIG01233070	NA
scaffold1|size1664507	fig|6666666.156949.peg.1192	peg	scaffold1|size1664507_1076022_1074673	1076022	1074673	-	Potassium uptake protein, integral membrane component, KtrD	FIG00774534	isu;Hyperosmotic_potassium_uptake
scaffold1|size1664507	fig|6666666.156949.peg.1193	peg	scaffold1|size1664507_1077092_1076196	1077092	1076196	-	Probable protease htpX homolog (EC 3.4.24.-)	FIG01385468	NA
scaffold1|size1664507	fig|6666666.156949.peg.1194	peg	scaffold1|size1664507_1077263_1077964	1077263	1077964	+	FIG01228638: hypothetical protein	FIG01228636	NA
scaffold1|size1664507	fig|6666666.156949.peg.1195	peg	scaffold1|size1664507_1078095_1078289	1078095	1078289	+	Small acid-soluble spore protein, alpha/beta family, SASP_6	FIG00012516	isu;Small_acid-soluble_spore_proteins
scaffold1|size1664507	fig|6666666.156949.peg.1196	peg	scaffold1|size1664507_1079445_1078300	1079445	1078300	-	FIG01228869: hypothetical protein	FIG01228867	NA
scaffold1|size1664507	fig|6666666.156949.peg.1197	peg	scaffold1|size1664507_1080197_1079442	1080197	1079442	-	RNA polymerase heat shock sigma factor SigI	FIG00081664	isu;Transcription_initiation,_bacterial_sigma_factors
scaffold1|size1664507	fig|6666666.156949.peg.1198	peg	scaffold1|size1664507_1081255_1080461	1081255	1080461	-	TerC-like integral membrane protein	FIG01333072	NA
scaffold1|size1664507	fig|6666666.156949.peg.1199	peg	scaffold1|size1664507_1081365_1081490	1081365	1081490	+	hypothetical protein	NA	NA
scaffold1|size1664507	fig|6666666.156949.peg.1200	peg	scaffold1|size1664507_1082147_1081512	1082147	1081512	-	FIG139438: lipoprotein B	FIG00060285	idu(1);Stationary_phase_repair_cluster
scaffold1|size1664507	fig|6666666.156949.peg.1201	peg	scaffold1|size1664507_1082511_1084760	1082511	1084760	+	Predicted signal transduction protein	FIG00004628	isu;Flagellar_motility
scaffold1|size1664507	fig|6666666.156949.peg.1202	peg	scaffold1|size1664507_1084848_1085732	1084848	1085732	+	Ku domain protein	FIG00001754	isu;DNA_Repair_Base_Excision isu;Nonhomologous_End-Joining_in_Bacteria isu;DNA_ligases isu;Bacillus_subtilis_scratch_-_gjo
scaffold1|size1664507	fig|6666666.156949.peg.1203	peg	scaffold1|size1664507_1085874_1087571	1085874	1087571	+	ATP-dependent DNA ligase (EC 6.5.1.1) clustered with Ku protein, LigD	FIG00002268	icw(1);DNA_Repair_Base_Excision icw(1);Nonhomologous_End-Joining_in_Bacteria icw(1);DNA_ligases icw(1);Bacillus_subtilis_scratch_-_gjo
scaffold1|size1664507	fig|6666666.156949.peg.1204	peg	scaffold1|size1664507_1088610_1087597	1088610	1087597	-	Glycosyltransferase	NA	NA
scaffold1|size1664507	fig|6666666.156949.peg.1205	peg	scaffold1|size1664507_1090317_1088623	1090317	1088623	-	FIG00672966: hypothetical protein	FIG01422112	NA
scaffold1|size1664507	fig|6666666.156949.peg.1206	peg	scaffold1|size1664507_1090510_1091322	1090510	1091322	+	phosphoesterase	FIG00673828	NA
scaffold1|size1664507	fig|6666666.156949.peg.1207	peg	scaffold1|size1664507_1091994_1091350	1091994	1091350	-	unknown	NA	NA
scaffold1|size1664507	fig|6666666.156949.peg.1208	peg	scaffold1|size1664507_1091993_1093114	1091993	1093114	+	1,2-diacylglycerol 3-glucosyltransferase (EC 2.4.1.157); diglucosyldiacylglycerol synthase (LTA membrane anchor synthesis); putative	FIG00134057	idu(1);Teichoic_and_lipoteichoic_acids_biosynthesis
scaffold1|size1664507	fig|6666666.156949.peg.1209	peg	scaffold1|size1664507_1093593_1093129	1093593	1093129	-	Transcriptional regulator, MarR family	FIG00554610	NA
scaffold1|size1664507	fig|6666666.156949.peg.1210	peg	scaffold1|size1664507_1093908_1093726	1093908	1093726	-	FIG01236524: hypothetical protein	FIG01236522	NA
scaffold1|size1664507	fig|6666666.156949.peg.1211	peg	scaffold1|size1664507_1094151_1093996	1094151	1093996	-	hypothetical protein	NA	NA
scaffold1|size1664507	fig|6666666.156949.peg.1212	peg	scaffold1|size1664507_1094346_1094678	1094346	1094678	+	global nitrogen regulation (positive regulation of nrgAB, nasB, gabP, ureABC; negative regulation of glnRA)	FIG01231506	NA
scaffold1|size1664507	fig|6666666.156949.peg.1213	peg	scaffold1|size1664507_1096076_1094721	1096076	1094721	-	Mg/Co/Ni transporter MgtE / CBS domain	FIG00437800	isu;Magnesium_transport
scaffold1|size1664507	fig|6666666.156949.peg.1214	peg	scaffold1|size1664507_1096718_1096581	1096718	1096581	-	hypothetical protein	NA	NA
scaffold1|size1664507	fig|6666666.156949.peg.1215	peg	scaffold1|size1664507_1097313_1096801	1097313	1096801	-	YKOJ	FIG01233950	NA
scaffold1|size1664507	fig|6666666.156949.peg.1216	peg	scaffold1|size1664507_1098085_1097405	1098085	1097405	-	YKOI	FIG01237807	NA
scaffold1|size1664507	fig|6666666.156949.peg.1217	peg	scaffold1|size1664507_1099446_1098082	1099446	1098082	-	sensor histidine kinase	FIG00431356	NA
scaffold1|size1664507	fig|6666666.156949.peg.1218	peg	scaffold1|size1664507_1100112_1099450	1100112	1099450	-	two-component response regulator	FIG00627566	NA
scaffold1|size1664507	fig|6666666.156949.peg.1219	peg	scaffold1|size1664507_1100447_1101049	1100447	1101049	+	Additional substrate-binding component of thiamin-regulated ECF transporter for HydroxyMethylPyrimidine	FIG00136386	isu;Thiamin_biosynthesis
scaffold1|size1664507	fig|6666666.156949.peg.1220	peg	scaffold1|size1664507_1101051_1101650	1101051	1101650	+	Substrate-specific component YkoE of thiamin-regulated ECF transporter for HydroxyMethylPyrimidine	FIG00010078	icw(1);ECF_class_transporters icw(2);Thiamin_biosynthesis
scaffold1|size1664507	fig|6666666.156949.peg.1221	peg	scaffold1|size1664507_1101637_1103280	1101637	1103280	+	Duplicated ATPase component YkoD of energizing module of thiamin-regulated ECF transporter for HydroxyMethylPyrimidine	FIG00009894	icw(2);ECF_class_transporters
scaffold1|size1664507	fig|6666666.156949.peg.1222	peg	scaffold1|size1664507_1103255_1104019	1103255	1104019	+	Transmembrane component YkoC of energizing module of thiamin-regulated ECF transporter for HydroxyMethylPyrimidine	FIG00032753	isu;ECF_class_transporters icw(1);Thiamin_biosynthesis
scaffold1|size1664507	fig|6666666.156949.peg.1223	peg	scaffold1|size1664507_1104883_1104050	1104883	1104050	-	RsbR, positive regulator of sigma-B	FIG00001285	idu(5);SigmaB_stress_responce_regulation
scaffold1|size1664507	fig|6666666.156949.peg.1224	peg	scaffold1|size1664507_1105155_1105003	1105155	1105003	-	hypothetical protein	NA	NA
scaffold1|size1664507	fig|6666666.156949.peg.1225	peg	scaffold1|size1664507_1105106_1106065	1105106	1106065	+	Major intracellular serine protease precursor (EC 3.4.21.-)	FIG01357100	NA
scaffold1|size1664507	fig|6666666.156949.peg.1226	peg	scaffold1|size1664507_1106358_1106483	1106358	1106483	+	hypothetical protein	NA	NA
scaffold1|size1664507	fig|6666666.156949.peg.1227	peg	scaffold1|size1664507_1106480_1108768	1106480	1108768	+	5-methyltetrahydropteroyltriglutamate--homocysteine methyltransferase (EC 2.1.1.14)	FIG00000683	isu;Methionine_Biosynthesis
scaffold1|size1664507	fig|6666666.156949.peg.1228	peg	scaffold1|size1664507_1108941_1109411	1108941	1109411	+	Guanine deaminase (EC 3.5.4.3)	FIG00117785	isu;Purine_conversions isu;Purine_Utilization
scaffold1|size1664507	fig|6666666.156949.peg.1229	peg	scaffold1|size1664507_1109626_1109489	1109626	1109489	-	FIG01246927: hypothetical protein	FIG01459626	NA
scaffold1|size1664507	fig|6666666.156949.peg.1230	peg	scaffold1|size1664507_1110073_1109663	1110073	1109663	-	Organic hydroperoxide resistance protein	FIG00138617	icw(2);Oxidative_stress icw(2);CBSS-269482.1.peg.1294
scaffold1|size1664507	fig|6666666.156949.peg.1231	peg	scaffold1|size1664507_1110216_1110659	1110216	1110659	+	Organic hydroperoxide resistance transcriptional regulator	FIG00025887	isu;Oxidative_stress isu;CBSS-269482.1.peg.1294
scaffold1|size1664507	fig|6666666.156949.peg.1232	peg	scaffold1|size1664507_1111115_1110690	1111115	1110690	-	Organic hydroperoxide resistance protein	FIG00138617	icw(2);Oxidative_stress icw(2);CBSS-269482.1.peg.1294
scaffold1|size1664507	fig|6666666.156949.peg.1233	peg	scaffold1|size1664507_1112488_1111241	1112488	1111241	-	Gamma-glutamyl phosphate reductase (EC 1.2.1.41)	FIG00000365	isu;Proline_Synthesis
scaffold1|size1664507	fig|6666666.156949.peg.1234	peg	scaffold1|size1664507_1113597_1112500	1113597	1112500	-	Glutamate 5-kinase (EC 2.7.2.11) / RNA-binding C-terminal domain PUA	FIG00000351	icw(1);Proline_Synthesis icw(1);Proline_Synthesis
scaffold1|size1664507	fig|6666666.156949.peg.1235	peg	scaffold1|size1664507_1114850_1113948	1114850	1113948	-	Formyltetrahydrofolate deformylase (EC 3.5.1.10)	FIG00000507	isu;5-FCL-like_protein isu;One-carbon_metabolism_by_tetrahydropterines
scaffold1|size1664507	fig|6666666.156949.peg.1236	peg	scaffold1|size1664507_1115238_1114921	1115238	1114921	-	Broad-specificity multidrug efflux pump YkkD	FIG01963593	NA
scaffold1|size1664507	fig|6666666.156949.peg.1237	peg	scaffold1|size1664507_1115576_1115238	1115576	1115238	-	Quaternary ammonium compound-resistance protein SugE	FIG00948922	NA
scaffold1|size1664507	fig|6666666.156949.peg.1238	peg	scaffold1|size1664507_1116316_1115798	1116316	1115798	-	FIG01227499: hypothetical protein	FIG01227498	NA
scaffold1|size1664507	fig|6666666.156949.peg.1239	peg	scaffold1|size1664507_1116833_1116306	1116833	1116306	-	FIG01227877: hypothetical protein	FIG01227876	NA
scaffold1|size1664507	fig|6666666.156949.peg.1240	peg	scaffold1|size1664507_1117656_1116925	1117656	1116925	-	probable membrane protein yetF	FIG01308948	NA
scaffold1|size1664507	fig|6666666.156949.peg.1241	peg	scaffold1|size1664507_1117916_1118029	1117916	1118029	+	Uncharacterized protein ykzH	FIG01434336	NA
scaffold1|size1664507	fig|6666666.156949.peg.1242	peg	scaffold1|size1664507_1119305_1118106	1119305	1118106	-	Flavohemoprotein (Hemoglobin-like protein) (Flavohemoglobin) (Nitric oxide dioxygenase) (EC 1.14.12.17)	FIG00000983	idu(1);Glutaredoxins idu(1);Flavohaemoglobin idu(1);Bacterial_hemoglobins
scaffold1|size1664507	fig|6666666.156949.peg.1243	peg	scaffold1|size1664507_1120106_1119546	1120106	1119546	-	Acyl-CoA hydrolase (EC 3.1.2.20)	FIG01955826	NA
scaffold1|size1664507	fig|6666666.156949.peg.1244	peg	scaffold1|size1664507_1120224_1121084	1120224	1121084	+	NG,NG-dimethylarginine dimethylaminohydrolase 1 (EC 3.5.3.18)	FIG00002156	isu;Dimethylarginine_metabolism
scaffold1|size1664507	fig|6666666.156949.peg.1245	peg	scaffold1|size1664507_1121174_1122223	1121174	1122223	+	6-phosphogluconolactonase (EC 3.1.1.31)	FIG01964866	isu;Pentose_phosphate_pathway isu;Entner-Doudoroff_Pathway
scaffold1|size1664507	fig|6666666.156949.peg.1246	peg	scaffold1|size1664507_1123256_1122267	1123256	1122267	-	Oligopeptide transport ATP-binding protein OppF (TC 3.A.1.5.1)	FIG00018865	idu(2);ABC_transporter_oligopeptide_(TC_3.A.1.5.1)
scaffold1|size1664507	fig|6666666.156949.peg.1247	peg	scaffold1|size1664507_1124159_1123269	1124159	1123269	-	NLP/P60 family protein	FIG00012683	isu;CBSS-393121.3.peg.2760
scaffold1|size1664507	fig|6666666.156949.peg.1248	peg	scaffold1|size1664507_1125256_1124156	1125256	1124156	-	L-alanine-DL-glutamate epimerase	FIG00908297	isu;Muconate_lactonizing_enzyme_family isu;Recycling_of_Peptidoglycan_Amino_Acids
scaffold1|size1664507	fig|6666666.156949.peg.1249	peg	scaffold1|size1664507_1126212_1125253	1126212	1125253	-	Muramoyltetrapeptide carboxypeptidase (EC 3.4.17.13)	FIG00004788	idu(1);Murein_Hydrolases icw(1);Recycling_of_Peptidoglycan_Amino_Acids idu(1);Metallocarboxypeptidases_(EC_3.4.17.-)
scaffold1|size1664507	fig|6666666.156949.peg.1250	peg	scaffold1|size1664507_1127931_1126300	1127931	1126300	-	Dipeptide-binding ABC transporter, periplasmic substrate-binding component (TC 3.A.1.5.2)	NA	icw(3);ABC_transporter_dipeptide_(TC_3.A.1.5.2) isu;Bacterial_Chemotaxis
scaffold1|size1664507	fig|6666666.156949.peg.1251	peg	scaffold1|size1664507_1128959_1127952	1128959	1127952	-	Dipeptide transport ATP-binding protein DppD (TC 3.A.1.5.2)	FIG00014907	icw(1);ABC_transporter_dipeptide_(TC_3.A.1.5.2)
scaffold1|size1664507	fig|6666666.156949.peg.1252	peg	scaffold1|size1664507_1129926_1128964	1129926	1128964	-	Dipeptide transport system permease protein DppC (TC 3.A.1.5.2)	NA	icw(2);ABC_transporter_dipeptide_(TC_3.A.1.5.2)
scaffold1|size1664507	fig|6666666.156949.peg.1253	peg	scaffold1|size1664507_1130858_1129932	1130858	1129932	-	Dipeptide transport system permease protein DppB (TC 3.A.1.5.2)	NA	isu;ABC_transporter_dipeptide_(TC_3.A.1.5.2)
scaffold1|size1664507	fig|6666666.156949.peg.1254	peg	scaffold1|size1664507_1131699_1130875	1131699	1130875	-	D-aminopeptidase (EC 3.4.11.-)	FIG01334027	NA
scaffold1|size1664507	fig|6666666.156949.peg.1255	peg	scaffold1|size1664507_1131725_1131856	1131725	1131856	+	hypothetical protein	NA	NA
scaffold1|size1664507	fig|6666666.156949.peg.1256	peg	scaffold1|size1664507_1132646_1131828	1132646	1131828	-	Pyrroline-5-carboxylate reductase (EC 1.5.1.2), ProG-like	FIG00132590	isu;Proline_Synthesis
scaffold1|size1664507	fig|6666666.156949.peg.1257	peg	scaffold1|size1664507_1132812_1134173	1132812	1134173	+	Serine protease, DegP/HtrA, do-like (EC 3.4.21.-)	FIG00083017	NA
scaffold1|size1664507	fig|6666666.156949.peg.1258	peg	scaffold1|size1664507_1135662_1134691	1135662	1134691	-	Glycosyltransferase	FIG00007960	NA
scaffold1|size1664507	fig|6666666.156949.peg.1259	peg	scaffold1|size1664507_1137842_1135674	1137842	1135674	-	FIG01241347: hypothetical protein	FIG01241344	NA
scaffold1|size1664507	fig|6666666.156949.peg.1260	peg	scaffold1|size1664507_1139047_1138097	1139047	1138097	-	Glyoxalase family protein	FIG00007915	NA
scaffold1|size1664507	fig|6666666.156949.peg.1261	peg	scaffold1|size1664507_1139435_1140751	1139435	1140751	+	amino acid permease family protein	FIG01308903	NA
scaffold1|size1664507	fig|6666666.156949.peg.1262	peg	scaffold1|size1664507_1141027_1141644	1141027	1141644	+	Phosphate transport regulator (distant homolog of PhoU)	FIG00022740	icw(1);Phosphate_metabolism
scaffold1|size1664507	fig|6666666.156949.peg.1263	peg	scaffold1|size1664507_1141657_1142658	1141657	1142658	+	Probable low-affinity inorganic phosphate transporter	FIG00009601	isu;Phosphate_metabolism
scaffold1|size1664507	fig|6666666.156949.peg.1264	peg	scaffold1|size1664507_1142768_1143514	1142768	1143514	+	alternate gene name: ykaC lethal when synthesized during vegetative growth in the absence of SpoIISB	FIG01228779	NA
scaffold1|size1664507	fig|6666666.156949.peg.1265	peg	scaffold1|size1664507_1143514_1143684	1143514	1143684	+	SpoIISB	FIG01226214	NA
scaffold1|size1664507	fig|6666666.156949.peg.1266	peg	scaffold1|size1664507_1143785_1143907	1143785	1143907	+	hypothetical protein	NA	NA
scaffold1|size1664507	fig|6666666.156949.peg.1267	peg	scaffold1|size1664507_1144837_1143944	1144837	1143944	-	N-acetylmuramoyl-L-alanine amidase CwlH implicated in mother cell lysis (EC 3.5.1.28)	FIG01237668	NA
scaffold1|size1664507	fig|6666666.156949.peg.1268	peg	scaffold1|size1664507_1145113_1144850	1145113	1144850	-	holin	FIG00630076	NA
scaffold1|size1664507	fig|6666666.156949.peg.1269	peg	scaffold1|size1664507_1145395_1145126	1145395	1145126	-	phage related protein	FIG01240002	NA
scaffold1|size1664507	fig|6666666.156949.peg.1270	peg	scaffold1|size1664507_1146287_1145448	1146287	1145448	-	Phage-like element PBSX protein xepA (Protein xkdY)	FIG01234469	NA
scaffold1|size1664507	fig|6666666.156949.peg.1271	peg	scaffold1|size1664507_1146495_1146331	1146495	1146331	-	FIG01236576: hypothetical protein	FIG01236574	NA
scaffold1|size1664507	fig|6666666.156949.peg.1272	peg	scaffold1|size1664507_1146821_1146492	1146821	1146492	-	FIG01238688: hypothetical protein	FIG01238687	NA
scaffold1|size1664507	fig|6666666.156949.peg.1273	peg	scaffold1|size1664507_1148892_1146835	1148892	1146835	-	Uncharacterized protein yqcC	FIG01239363	NA
scaffold1|size1664507	fig|6666666.156949.peg.1274	peg	scaffold1|size1664507_1149167_1148895	1149167	1148895	-	FIG01238565: hypothetical protein	FIG01238562	NA
scaffold1|size1664507	fig|6666666.156949.peg.1275	peg	scaffold1|size1664507_1149742_1149164	1149742	1149164	-	Phage-like element PBSX protein xkdU	FIG01230818	NA
scaffold1|size1664507	fig|6666666.156949.peg.1276	peg	scaffold1|size1664507_1150772_1149726	1150772	1149726	-	Phage baseplate	FIG01305804	isu;Phage_baseplate_proteins
scaffold1|size1664507	fig|6666666.156949.peg.1277	peg	scaffold1|size1664507_1151190_1150765	1151190	1150765	-	Phage-like element PBSX protein xkdS	FIG00513535	NA
scaffold1|size1664507	fig|6666666.156949.peg.1278	peg	scaffold1|size1664507_1151513_1151247	1151513	1151247	-	FIG01234021: hypothetical protein	FIG01234019	NA
scaffold1|size1664507	fig|6666666.156949.peg.1279	peg	scaffold1|size1664507_1152490_1151513	1152490	1151513	-	Phage-like element PBSX protein xkdQ	FIG00671080	NA
scaffold1|size1664507	fig|6666666.156949.peg.1280	peg	scaffold1|size1664507_1153165_1152506	1153165	1152506	-	Phage-like element PBSX protein xkdP	FIG01344725	NA
scaffold1|size1664507	fig|6666666.156949.peg.1281	peg	scaffold1|size1664507_1156856_1153158	1156856	1153158	-	Phage tail length tape-measure protein	FIG00011468	isu;Phage_tail_proteins isu;Phage_tail_proteins_2
scaffold1|size1664507	fig|6666666.156949.peg.1282	peg	scaffold1|size1664507_1157666_1157223,scaffold1|size1664507_1157223_1157041	1157666	1157041	-	Phage-like element PBSX protein xkdN	FIG01365837	NA
scaffold1|size1664507	fig|6666666.156949.peg.1283	peg	scaffold1|size1664507_1158202_1157759	1158202	1157759	-	Phage tail fibers	FIG01304225	isu;Phage_tail_fiber_proteins
scaffold1|size1664507	fig|6666666.156949.peg.1284	peg	scaffold1|size1664507_1159604_1158204	1159604	1158204	-	Phage-like element PBSX protein xkdK	FIG00514072	NA
scaffold1|size1664507	fig|6666666.156949.peg.1285	peg	scaffold1|size1664507_1159819_1159601	1159819	1159601	-	FIG01230007: hypothetical protein	FIG01230005	NA
scaffold1|size1664507	fig|6666666.156949.peg.1286	peg	scaffold1|size1664507_1160263_1159823	1160263	1159823	-	Phage-like element PBSX protein xkdJ	FIG01230647	NA
scaffold1|size1664507	fig|6666666.156949.peg.1287	peg	scaffold1|size1664507_1160761_1160276	1160761	1160276	-	Lin1275 protein	FIG01226412	NA
scaffold1|size1664507	fig|6666666.156949.peg.1288	peg	scaffold1|size1664507_1161114_1160758	1161114	1160758	-	Phage-like element PBSX protein xkdH	FIG01227966	NA
scaffold1|size1664507	fig|6666666.156949.peg.1289	peg	scaffold1|size1664507_1161494_1161111	1161494	1161111	-	YqbG	FIG01225885	NA
scaffold1|size1664507	fig|6666666.156949.peg.1290	peg	scaffold1|size1664507_1162451_1161516	1162451	1161516	-	Phage-like element PBSX protein xkdG	FIG01319911	NA
scaffold1|size1664507	fig|6666666.156949.peg.1291	peg	scaffold1|size1664507_1163304_1162477	1163304	1162477	-	FIG01230357: hypothetical protein	FIG01230356	NA
scaffold1|size1664507	fig|6666666.156949.peg.1292	peg	scaffold1|size1664507_1164811_1163324	1164811	1163324	-	Phage-like element PBSX protein xkdE	FIG01327823	NA
scaffold1|size1664507	fig|6666666.156949.peg.1293	peg	scaffold1|size1664507_1166116_1164815	1166116	1164815	-	Phage terminase, large subunit [SA bacteriophages 11, Mu50B]	FIG01233775	NA
scaffold1|size1664507	fig|6666666.156949.peg.1294	peg	scaffold1|size1664507_1166910_1166113	1166910	1166113	-	Phage terminase small subunit	FIG00433263	NA
scaffold1|size1664507	fig|6666666.156949.peg.1295	peg	scaffold1|size1664507_1167536_1167027	1167536	1167027	-	RNA polymerase sigma-70 factor	FIG01303902	idu(2);CBSS-316057.3.peg.1308 idu(2);Transcription_initiation,_bacterial_sigma_factors
scaffold1|size1664507	fig|6666666.156949.peg.1296	peg	scaffold1|size1664507_1167858_1167652	1167858	1167652	-	Phage-like element PBSX protein xtrA	FIG01328779	NA
scaffold1|size1664507	fig|6666666.156949.peg.1297	peg	scaffold1|size1664507_1168205_1167855	1168205	1167855	-	XkdD	FIG01234899	NA
scaffold1|size1664507	fig|6666666.156949.peg.1298	peg	scaffold1|size1664507_1168457_1168290	1168457	1168290	-	FIG01227758: hypothetical protein	FIG01227757	NA
scaffold1|size1664507	fig|6666666.156949.peg.1299	peg	scaffold1|size1664507_1169092_1168457	1169092	1168457	-	DNA replication protein DnaC	FIG00763261	idu(1);DNA-replication
scaffold1|size1664507	fig|6666666.156949.peg.1300	peg	scaffold1|size1664507_1169993_1169157	1169993	1169157	-	Phage-like element PBSX protein xkdB	FIG01372523	NA
scaffold1|size1664507	fig|6666666.156949.peg.1301	peg	scaffold1|size1664507_1170159_1169980	1170159	1169980	-	FIG01238057: hypothetical protein	FIG01238056	NA
scaffold1|size1664507	fig|6666666.156949.peg.1302	peg	scaffold1|size1664507_1170338_1170679	1170338	1170679	+	negative regulation of the defective prophage PBSX genes	FIG01226615	NA
scaffold1|size1664507	fig|6666666.156949.peg.1303	peg	scaffold1|size1664507_1170842_1171438	1170842	1171438	+	phage-like element PBSX protein XkdA	FIG01310999	NA
scaffold1|size1664507	fig|6666666.156949.peg.1304	peg	scaffold1|size1664507_1172318_1171482	1172318	1171482	-	Catalase (EC 1.11.1.6)	FIG00000313	idu(4);Oxidative_stress idu(4);Protection_from_Reactive_Oxygen_Species
scaffold1|size1664507	fig|6666666.156949.peg.1305	peg	scaffold1|size1664507_1172997_1172395	1172997	1172395	-	FIG01231560: hypothetical protein	FIG01231557	NA
scaffold1|size1664507	fig|6666666.156949.peg.1306	peg	scaffold1|size1664507_1173102_1173479	1173102	1173479	+	DUF1696 domain-containing protein	FIG01307504	NA
scaffold1|size1664507	fig|6666666.156949.peg.1307	peg	scaffold1|size1664507_1174472_1173519	1174472	1173519	-	N-acetylmuramoyl-L-alanine amidase( EC:3.5.1.28 )	FIG01367732	NA
scaffold1|size1664507	fig|6666666.156949.peg.1308	peg	scaffold1|size1664507_1174593_1174850	1174593	1174850	+	FIG01228169: hypothetical protein	FIG01228167	NA
scaffold1|size1664507	fig|6666666.156949.peg.1309	peg	scaffold1|size1664507_1175015_1174881	1175015	1174881	-	inhibitor of the activity of phosphatase RapA	NA	NA
scaffold1|size1664507	fig|6666666.156949.peg.1310	peg	scaffold1|size1664507_1176135_1175005	1176135	1175005	-	response regulator aspartate phosphatase	FIG01228496	NA
scaffold1|size1664507	fig|6666666.156949.peg.1311	peg	scaffold1|size1664507_1177557_1176286	1177557	1176286	-	Cell division protein FtsH (EC 3.4.24.-)	FIG01120704	idu(1);Bacterial_Cell_Division idu(1);Cell_division-ribosomal_stress_proteins_cluster idu(1);Folate_biosynthesis_cluster
scaffold1|size1664507	fig|6666666.156949.peg.1312	peg	scaffold1|size1664507_1177706_1178170	1177706	1178170	+	FIG01232970: hypothetical protein	FIG01232969	NA
scaffold1|size1664507	fig|6666666.156949.peg.1313	peg	scaffold1|size1664507_1178395_1179159	1178395	1179159	+	Putative sulfate permease	FIG00004276	isu;Inorganic_Sulfur_Assimilation
scaffold1|size1664507	fig|6666666.156949.peg.1314	peg	scaffold1|size1664507_1180693_1179200	1180693	1179200	-	Altronate dehydratase (EC 4.2.1.7)	FIG00001417	NA
scaffold1|size1664507	fig|6666666.156949.peg.1315	peg	scaffold1|size1664507_1182132_1180690	1182132	1180690	-	Altronate oxidoreductase (EC 1.1.1.58)	FIG00002628	icw(1);D-Galacturonate_and_D-Glucuronate_Utilization
scaffold1|size1664507	fig|6666666.156949.peg.1316	peg	scaffold1|size1664507_1183210_1182209	1183210	1182209	-	Hexuronate utilization operon transcriptional repressor ExuR	FIG00029606	icw(4);D-Galacturonate_and_D-Glucuronate_Utilization
scaffold1|size1664507	fig|6666666.156949.peg.1317	peg	scaffold1|size1664507_1184566_1183298	1184566	1183298	-	Hexuronate transporter	FIG00040843	icw(2);D-Galacturonate_and_D-Glucuronate_Utilization
scaffold1|size1664507	fig|6666666.156949.peg.1318	peg	scaffold1|size1664507_1185450_1184614	1185450	1184614	-	D-mannonate oxidoreductase (EC 1.1.1.57)	FIG00001516	icw(4);D-Galacturonate_and_D-Glucuronate_Utilization
scaffold1|size1664507	fig|6666666.156949.peg.1319	peg	scaffold1|size1664507_1186526_1185447	1186526	1185447	-	Mannonate dehydratase (EC 4.2.1.8)	FIG00060024	isu;D-Galacturonate_and_D-Glucuronate_Utilization
scaffold1|size1664507	fig|6666666.156949.peg.1320	peg	scaffold1|size1664507_1187570_1186551	1187570	1186551	-	Starvation sensing protein RspB	FIG01069843	isu;Carbon_Starvation
scaffold1|size1664507	fig|6666666.156949.peg.1321	peg	scaffold1|size1664507_1188588_1188169,scaffold1|size1664507_1188169_1187576	1188588	1187576	-	(R)-2-hydroxyacid dehydrogenase, similar to L-sulfolactate dehydrogenase (EC 1.1.1.272)	FIG01303804	isu;Glyoxylate_bypass
scaffold1|size1664507	fig|6666666.156949.peg.1322	peg	scaffold1|size1664507_1190072_1188693	1190072	1188693	-	Glucuronide transporter UidB	FIG01304772	icw(1);D-Galacturonate_and_D-Glucuronate_Utilization
scaffold1|size1664507	fig|6666666.156949.peg.1323	peg	scaffold1|size1664507_1191549_1190140	1191549	1190140	-	Uronate isomerase (EC 5.3.1.12)	FIG00001411	icw(2);D-Galacturonate_and_D-Glucuronate_Utilization
scaffold1|size1664507	fig|6666666.156949.peg.1324	peg	scaffold1|size1664507_1191715_1191581	1191715	1191581	-	hypothetical protein	NA	NA
scaffold1|size1664507	fig|6666666.156949.peg.1325	peg	scaffold1|size1664507_1192937_1191759	1192937	1191759	-	NADH dehydrogenase (EC 1.6.99.3)	FIG00008708	idu(2);Respiratory_dehydrogenases_1 idu(2);Riboflavin_synthesis_cluster
scaffold1|size1664507	fig|6666666.156949.peg.1326	peg	scaffold1|size1664507_1193399_1192977	1193399	1192977	-	FIG01228225: hypothetical protein	FIG01228223	NA
scaffold1|size1664507	fig|6666666.156949.peg.1327	peg	scaffold1|size1664507_1193631_1193512	1193631	1193512	-	hypothetical protein	NA	NA
scaffold1|size1664507	fig|6666666.156949.peg.1328	peg	scaffold1|size1664507_1194285_1193788	1194285	1193788	-	Cupin domain-containing protein	FIG01349555	NA
scaffold1|size1664507	fig|6666666.156949.peg.1329	peg	scaffold1|size1664507_1194367_1194248	1194367	1194248	-	hypothetical protein	NA	NA
scaffold1|size1664507	fig|6666666.156949.peg.1330	peg	scaffold1|size1664507_1194417_1195391	1194417	1195391	+	membrane protein, putative	FIG00439698	NA
scaffold1|size1664507	fig|6666666.156949.peg.1331	peg	scaffold1|size1664507_1195511_1196263	1195511	1196263	+	YbbL ABC transporter ATP-binding protein	FIG00012845	icw(1);Broadly_distributed_proteins_not_in_subsystems
scaffold1|size1664507	fig|6666666.156949.peg.1332	peg	scaffold1|size1664507_1196263_1197015	1196263	1197015	+	YbbM seven transmembrane helix protein	FIG00004730	isu;Broadly_distributed_proteins_not_in_subsystems
scaffold1|size1664507	fig|6666666.156949.peg.1333	peg	scaffold1|size1664507_1197873_1197061	1197873	1197061	-	Uroporphyrinogen-III synthase (EC 4.2.1.75)	FIG00056694	idu(2);Heme_and_Siroheme_Biosynthesis
scaffold1|size1664507	fig|6666666.156949.peg.1334	peg	scaffold1|size1664507_1198047_1198235	1198047	1198235	+	FIG01231759: hypothetical protein	FIG01231758	NA
scaffold1|size1664507	fig|6666666.156949.peg.1335	peg	scaffold1|size1664507_1199454_1198276	1199454	1198276	-	Glycosyl transferase Family 1	FIG01228988	NA
scaffold1|size1664507	fig|6666666.156949.peg.1336	peg	scaffold1|size1664507_1200667_1199477	1200667	1199477	-	putative cytochrome P450 hydroxylase	FIG00032437	idu(3);Nitric_oxide_synthase
scaffold1|size1664507	fig|6666666.156949.peg.1337	peg	scaffold1|size1664507_1201058_1201336	1201058	1201336	+	Uncharacterized protein yjiA precursor	FIG01669640	NA
scaffold1|size1664507	fig|6666666.156949.peg.1338	peg	scaffold1|size1664507_1201984_1201367	1201984	1201367	-	MutT/nudix family protein	FIG01323436	NA
scaffold1|size1664507	fig|6666666.156949.peg.1339	peg	scaffold1|size1664507_1202713_1202072	1202713	1202072	-	FIG01237457: hypothetical protein	FIG01237456	NA
scaffold1|size1664507	fig|6666666.156949.peg.1340	peg	scaffold1|size1664507_1203471_1202911	1203471	1202911	-	Hypothetical protein YrhD	FIG00002162	icw(1);Formate_hydrogenase
scaffold1|size1664507	fig|6666666.156949.peg.1341	peg	scaffold1|size1664507_1206421_1203464	1206421	1203464	-	Formate dehydrogenase related protein	FIG00002024	idu(1);Formate_hydrogenase
scaffold1|size1664507	fig|6666666.156949.peg.1342	peg	scaffold1|size1664507_1206567_1207142	1206567	1207142	+	Uncharacterized protein yjgB precursor	FIG01246979	NA
scaffold1|size1664507	fig|6666666.156949.peg.1343	peg	scaffold1|size1664507_1208543_1207938,scaffold1|size1664507_1207938_1207654,scaffold1|size1664507_1207650_1207546	1208543	1207546	-	FIG01237275: hypothetical protein	FIG01237274	NA
scaffold1|size1664507	fig|6666666.156949.peg.1344	peg	scaffold1|size1664507_1208656_1208540	1208656	1208540	-	hypothetical protein	NA	NA
scaffold1|size1664507	fig|6666666.156949.peg.1345	peg	scaffold1|size1664507_1208670_1208837	1208670	1208837	+	YjfB	FIG01227119	NA
scaffold1|size1664507	fig|6666666.156949.peg.1346	peg	scaffold1|size1664507_1208966_1209439	1208966	1209439	+	FIG01236863: hypothetical protein	FIG01236862	NA
scaffold1|size1664507	fig|6666666.156949.peg.1347	peg	scaffold1|size1664507_1210882_1209479	1210882	1209479	-	Peptidoglycan N-acetylglucosamine deacetylase (EC 3.5.1.-)	FIG00009450	idu(2);Polysaccharide_deacetylases
scaffold1|size1664507	fig|6666666.156949.peg.1348	peg	scaffold1|size1664507_1211137_1211370	1211137	1211370	+	Spore coat protein T precursor	FIG01498692	NA
scaffold1|size1664507	fig|6666666.156949.peg.1349	peg	scaffold1|size1664507_1211521_1212483	1211521	1212483	+	Heme O synthase, protoheme IX farnesyltransferase (EC 2.5.1.-) COX10-CtaB	NA	idu(1);CBSS-316057.3.peg.563 idu(1);Biogenesis_of_cytochrome_c_oxidases
scaffold1|size1664507	fig|6666666.156949.peg.1350	peg	scaffold1|size1664507_1212624_1212502	1212624	1212502	-	hypothetical protein	NA	NA
scaffold1|size1664507	fig|6666666.156949.peg.1351	peg	scaffold1|size1664507_1213089_1213418	1213089	1213418	+	FIG01229313: hypothetical protein	FIG01620537	NA
scaffold1|size1664507	fig|6666666.156949.peg.1352	peg	scaffold1|size1664507_1213550_1213744	1213550	1213744	+	FIG01229484: hypothetical protein	FIG01229481	NA
scaffold1|size1664507	fig|6666666.156949.peg.1353	peg	scaffold1|size1664507_1214263_1213784	1214263	1213784	-	Cys-tRNA(Pro) deacylase YbaK	FIG00003050	isu;tRNA_aminoacylation,_Pro
scaffold1|size1664507	fig|6666666.156949.peg.1354	peg	scaffold1|size1664507_1215106_1215612	1215106	1215612	+	acetyltransferase, GNAT family	FIG01315364	NA
scaffold1|size1664507	fig|6666666.156949.peg.1355	peg	scaffold1|size1664507_1216071_1215658	1216071	1215658	-	FIG01235032: hypothetical protein	FIG01335699	NA
scaffold1|size1664507	fig|6666666.156949.peg.1356	peg	scaffold1|size1664507_1217257_1216310	1217257	1216310	-	Mannose-6-phosphate isomerase (EC 5.3.1.8)	FIG00598409	icw(1);Mannose_Metabolism
scaffold1|size1664507	fig|6666666.156949.peg.1357	peg	scaffold1|size1664507_1219212_1217272	1219212	1217272	-	PTS system, mannose-specific IIB component (EC 2.7.1.69) / PTS system, mannose-specific IIC component (EC 2.7.1.69) / PTS system, mannose-specific IIA component (EC 2.7.1.69)	FIG01962533	idu(2);Mannose_Metabolism idu(1);Mannose_Metabolism idu(2);Mannose_Metabolism idu(2);Sialic_Acid_Metabolism idu(1);Sialic_Acid_Metabolism idu(2);Sialic_Acid_Metabolism
scaffold1|size1664507	fig|6666666.156949.peg.1358	peg	scaffold1|size1664507_1221306_1219360	1221306	1219360	-	Activator of the mannose operon (transcriptional antiterminator), BglG family	FIG00089473	icw(2);Mannose_Metabolism
scaffold1|size1664507	fig|6666666.156949.peg.1359	peg	scaffold1|size1664507_1221918_1221601	1221918	1221601	-	Uncharacterized protein yjcN precursor	FIG01433747	NA
scaffold1|size1664507	fig|6666666.156949.peg.1360	peg	scaffold1|size1664507_1222338_1222057	1222338	1222057	-	FIG01233439: hypothetical protein	FIG01233437	NA
scaffold1|size1664507	fig|6666666.156949.peg.1361	peg	scaffold1|size1664507_1222333_1222455	1222333	1222455	+	hypothetical protein	NA	NA
scaffold1|size1664507	fig|6666666.156949.peg.1362	peg	scaffold1|size1664507_1222622_1223722,scaffold1|size1664507_1223726_1223785	1222622	1223785	+	response regulator aspartate phosphatase	FIG01228496	NA
scaffold1|size1664507	fig|6666666.156949.peg.1363	peg	scaffold1|size1664507_1223772_1223894	1223772	1223894	+	hypothetical protein	NA	NA
scaffold1|size1664507	fig|6666666.156949.peg.1364	peg	scaffold1|size1664507_1224809_1225468	1224809	1225468	+	hypothetical protein	NA	NA
scaffold1|size1664507	fig|6666666.156949.peg.1365	peg	scaffold1|size1664507_1225740_1227602	1225740	1227602	+	Putative toxin component near putative ESAT-related proteins, repetitive / Repetitive hypothetical protein near ESAT cluster, SA0282 homolog	FIG00149320	NA
scaffold1|size1664507	fig|6666666.156949.peg.1366	peg	scaffold1|size1664507_1227867_1227983	1227867	1227983	+	hypothetical protein	NA	NA
scaffold1|size1664507	fig|6666666.156949.peg.1367	peg	scaffold1|size1664507_1228244_1228546	1228244	1228546	+	unknown	NA	NA
scaffold1|size1664507	fig|6666666.156949.peg.1368	peg	scaffold1|size1664507_1230319_1229555	1230319	1229555	-	hypothetical protein	NA	NA
scaffold1|size1664507	fig|6666666.156949.peg.1369	peg	scaffold1|size1664507_1230642_1230520	1230642	1230520	-	hypothetical protein	NA	NA
scaffold1|size1664507	fig|6666666.156949.peg.1370	peg	scaffold1|size1664507_1230877_1231107	1230877	1231107	+	hypothetical protein	NA	NA
scaffold1|size1664507	fig|6666666.156949.peg.1371	peg	scaffold1|size1664507_1231281_1231135	1231281	1231135	-	hypothetical protein	NA	NA
scaffold1|size1664507	fig|6666666.156949.peg.1372	peg	scaffold1|size1664507_1231457_1232275	1231457	1232275	+	SAM-dependent methyltransferases	NA	NA
scaffold1|size1664507	fig|6666666.156949.peg.1373	peg	scaffold1|size1664507_1232997_1233518	1232997	1233518	+	Phosphohydrolase (MutT/nudix family protein)	NA	NA
scaffold1|size1664507	fig|6666666.156949.peg.1374	peg	scaffold1|size1664507_1233581_1233721	1233581	1233721	+	hypothetical protein	NA	NA
scaffold1|size1664507	fig|6666666.156949.peg.1375	peg	scaffold1|size1664507_1234535_1233738	1234535	1233738	-	hypothetical protein	NA	NA
scaffold1|size1664507	fig|6666666.156949.peg.1376	peg	scaffold1|size1664507_1235344_1234547	1235344	1234547	-	hypothetical protein	NA	NA
scaffold1|size1664507	fig|6666666.156949.peg.1377	peg	scaffold1|size1664507_1235925_1235809	1235925	1235809	-	hypothetical protein	NA	NA
scaffold1|size1664507	fig|6666666.156949.peg.1378	peg	scaffold1|size1664507_1236671_1235946	1236671	1235946	-	hypothetical protein	NA	NA
scaffold1|size1664507	fig|6666666.156949.peg.1379	peg	scaffold1|size1664507_1237022_1238155	1237022	1238155	+	response regulator aspartate phosphatase	FIG01228496	NA
scaffold1|size1664507	fig|6666666.156949.peg.1380	peg	scaffold1|size1664507_1238145_1238264	1238145	1238264	+	hypothetical protein	NA	NA
scaffold1|size1664507	fig|6666666.156949.peg.1381	peg	scaffold1|size1664507_1238468_1239475	1238468	1239475	+	DNA-cytosine methyltransferase (EC 2.1.1.37)	NA	idu(1);DNA_repair,_bacterial
scaffold1|size1664507	fig|6666666.156949.peg.1382	peg	scaffold1|size1664507_1239468_1240553	1239468	1240553	+	ATP-dependent DNA ligase (EC 6.5.1.1) clustered with Ku protein, LigD	NA	idu(1);DNA_Repair_Base_Excision idu(1);Nonhomologous_End-Joining_in_Bacteria idu(1);DNA_ligases idu(1);Bacillus_subtilis_scratch_-_gjo
scaffold1|size1664507	fig|6666666.156949.peg.1383	peg	scaffold1|size1664507_1240600_1241277	1240600	1241277	+	hypothetical protein	NA	NA
scaffold1|size1664507	fig|6666666.156949.peg.1384	peg	scaffold1|size1664507_1241736_1242134	1241736	1242134	+	hypothetical protein	NA	NA
scaffold1|size1664507	fig|6666666.156949.peg.1385	peg	scaffold1|size1664507_1242121_1242537	1242121	1242537	+	hypothetical protein	NA	NA
scaffold1|size1664507	fig|6666666.156949.peg.1386	peg	scaffold1|size1664507_1242562_1243212	1242562	1243212	+	Phage protein	NA	NA
scaffold1|size1664507	fig|6666666.156949.peg.1387	peg	scaffold1|size1664507_1243226_1243468	1243226	1243468	+	hypothetical protein	NA	NA
scaffold1|size1664507	fig|6666666.156949.peg.1388	peg	scaffold1|size1664507_1243480_1244337	1243480	1244337	+	hypothetical protein	NA	NA
scaffold1|size1664507	fig|6666666.156949.peg.1389	peg	scaffold1|size1664507_1244660_1245709	1244660	1245709	+	hypothetical protein	NA	NA
scaffold1|size1664507	fig|6666666.156949.peg.1390	peg	scaffold1|size1664507_1246254_1246808	1246254	1246808	+	hypothetical protein	NA	NA
scaffold1|size1664507	fig|6666666.156949.peg.1391	peg	scaffold1|size1664507_1246811_1247197	1246811	1247197	+	hypothetical protein	NA	NA
scaffold1|size1664507	fig|6666666.156949.peg.1392	peg	scaffold1|size1664507_1247973_1248722	1247973	1248722	+	hypothetical protein	NA	NA
scaffold1|size1664507	fig|6666666.156949.peg.1393	peg	scaffold1|size1664507_1248774_1249988	1248774	1249988	+	RecA protein	NA	idu(1);DNA_repair_system_including_RecA,_MutS_and_a_hypothetical_protein idu(1);DNA_repair,_bacterial idu(1);DNA_repair,_bacterial_UmuCD_system idu(1);DNA-replication idu(1);DNA_repair,_bacterial_RecFOR_pathway idu(1);CBSS-257314.1.peg.676 idu(1);CBSS-469378.4.peg.430
scaffold1|size1664507	fig|6666666.156949.peg.1394	peg	scaffold1|size1664507_1250016_1250192	1250016	1250192	+	hypothetical protein	NA	NA
scaffold1|size1664507	fig|6666666.156949.peg.1395	peg	scaffold1|size1664507_1250205_1250387	1250205	1250387	+	hypothetical protein	NA	NA
scaffold1|size1664507	fig|6666666.156949.peg.1396	peg	scaffold1|size1664507_1251893_1252924	1251893	1252924	+	FIG01235713: hypothetical protein	FIG01235712	NA
scaffold1|size1664507	fig|6666666.156949.peg.1397	peg	scaffold1|size1664507_1252937_1253671	1252937	1253671	+	hypothetical protein	NA	NA
scaffold1|size1664507	fig|6666666.156949.peg.1398	peg	scaffold1|size1664507_1253753_1254490	1253753	1254490	+	Bacillus phage RNA polymerase sigma factor (SigF-like)	NA	NA
scaffold1|size1664507	fig|6666666.156949.peg.1399	peg	scaffold1|size1664507_1254928_1255704	1254928	1255704	+	hypothetical protein	NA	NA
scaffold1|size1664507	fig|6666666.156949.peg.1400	peg	scaffold1|size1664507_1255714_1256496	1255714	1256496	+	Cell wall-binding protein	NA	NA
scaffold1|size1664507	fig|6666666.156949.peg.1401	peg	scaffold1|size1664507_1256573_1256872	1256573	1256872	+	hypothetical protein	NA	NA
scaffold1|size1664507	fig|6666666.156949.peg.1402	peg	scaffold1|size1664507_1257120_1256896	1257120	1256896	-	hypothetical protein	NA	NA
scaffold1|size1664507	fig|6666666.156949.peg.1403	peg	scaffold1|size1664507_1257291_1257902	1257291	1257902	+	hypothetical protein	NA	NA
scaffold1|size1664507	fig|6666666.156949.peg.1404	peg	scaffold1|size1664507_1257903_1258865	1257903	1258865	+	RNA polymerase sigma factor RpoD	FIG00038814	idu(1);CBSS-349161.4.peg.2417 idu(1);Macromolecular_synthesis_operon idu(1);Flagellum idu(1);Transcription_initiation,_bacterial_sigma_factors
scaffold1|size1664507	fig|6666666.156949.peg.1405	peg	scaffold1|size1664507_1258924_1259295	1258924	1259295	+	hypothetical protein	NA	NA
scaffold1|size1664507	fig|6666666.156949.peg.1406	peg	scaffold1|size1664507_1259320_1259622	1259320	1259622	+	hypothetical protein	NA	NA
scaffold1|size1664507	fig|6666666.156949.peg.1407	peg	scaffold1|size1664507_1260875_1259958	1260875	1259958	-	Flagellin protein FlaA	FIG00000816	icw(1);Flagellum idu(1);Flagellum_in_Campylobacter
scaffold1|size1664507	fig|6666666.156949.peg.1408	peg	scaffold1|size1664507_1261086_1260877	1261086	1260877	-	hypothetical protein	NA	NA
scaffold1|size1664507	fig|6666666.156949.peg.1409	peg	scaffold1|size1664507_1262428_1261223	1262428	1261223	-	N-acetylmuramoyl-L-alanine amidase AmiB precursor (EC 3.5.1.28)	NA	NA
scaffold1|size1664507	fig|6666666.156949.peg.1410	peg	scaffold1|size1664507_1262752_1262444	1262752	1262444	-	hypothetical protein	NA	NA
scaffold1|size1664507	fig|6666666.156949.peg.1411	peg	scaffold1|size1664507_1263227_1264084	1263227	1264084	+	Site-specific recombinase XerD	NA	isu;Ribosome_post-transcriptional_modification_and_chromosomal_segregation_cluster
scaffold1|size1664507	fig|6666666.156949.peg.1412	peg	scaffold1|size1664507_1268002_1264148	1268002	1264148	-	Phage protein	NA	NA
scaffold1|size1664507	fig|6666666.156949.peg.1413	peg	scaffold1|size1664507_1270891_1268045	1270891	1268045	-	halomucin	FIG01888853	NA
scaffold1|size1664507	fig|6666666.156949.peg.1414	peg	scaffold1|size1664507_1271079_1270876	1271079	1270876	-	hypothetical protein	NA	NA
scaffold1|size1664507	fig|6666666.156949.peg.1415	peg	scaffold1|size1664507_1271663_1271526	1271663	1271526	-	FIG01249334: hypothetical protein	FIG01249332	NA
scaffold1|size1664507	fig|6666666.156949.peg.1416	peg	scaffold1|size1664507_1272541_1272095	1272541	1272095	-	hypothetical protein	NA	NA
scaffold1|size1664507	fig|6666666.156949.peg.1417	peg	scaffold1|size1664507_1273386_1272655	1273386	1272655	-	hypothetical protein	NA	NA
scaffold1|size1664507	fig|6666666.156949.peg.1418	peg	scaffold1|size1664507_1274522_1273398	1274522	1273398	-	Protein containing cell adhesion domain	FIG01421429	NA
scaffold1|size1664507	fig|6666666.156949.peg.1419	peg	scaffold1|size1664507_1278167_1274535	1278167	1274535	-	hypothetical protein	NA	NA
scaffold1|size1664507	fig|6666666.156949.peg.1420	peg	scaffold1|size1664507_1280137_1278248	1280137	1278248	-	FIG01230707: hypothetical protein	FIG01230706	NA
scaffold1|size1664507	fig|6666666.156949.peg.1421	peg	scaffold1|size1664507_1282295_1280160	1282295	1280160	-	FIG01242735: hypothetical protein	FIG01242733	NA
scaffold1|size1664507	fig|6666666.156949.peg.1422	peg	scaffold1|size1664507_1284101_1282416	1284101	1282416	-	FIG01233489: hypothetical protein	FIG01233488	NA
scaffold1|size1664507	fig|6666666.156949.peg.1423	peg	scaffold1|size1664507_1285812_1284262	1285812	1284262	-	hypothetical protein	NA	NA
scaffold1|size1664507	fig|6666666.156949.peg.1424	peg	scaffold1|size1664507_1288689_1286140	1288689	1286140	-	FIG01242735: hypothetical protein	NA	NA
scaffold1|size1664507	fig|6666666.156949.peg.1425	peg	scaffold1|size1664507_1289938_1289156	1289938	1289156	-	hypothetical protein	NA	NA
scaffold1|size1664507	fig|6666666.156949.peg.1426	peg	scaffold1|size1664507_1293514_1290026	1293514	1290026	-	Membrane proteins related to metalloendopeptidases	NA	idu(2);CBSS-393121.3.peg.2760
scaffold1|size1664507	fig|6666666.156949.peg.1427	peg	scaffold1|size1664507_1294599_1293526	1294599	1293526	-	FIG01238534: hypothetical protein	FIG01238529	NA
scaffold1|size1664507	fig|6666666.156949.peg.1428	peg	scaffold1|size1664507_1295236_1294601	1295236	1294601	-	FIG01247392: hypothetical protein	FIG01247391	NA
scaffold1|size1664507	fig|6666666.156949.peg.1429	peg	scaffold1|size1664507_1300575_1295278	1300575	1295278	-	FIG01243852: hypothetical protein	FIG01243850	NA
scaffold1|size1664507	fig|6666666.156949.peg.1430	peg	scaffold1|size1664507_1300786_1300640	1300786	1300640	-	hypothetical protein	NA	NA
scaffold1|size1664507	fig|6666666.156949.peg.1431	peg	scaffold1|size1664507_1301463_1300972	1301463	1300972	-	FIG01242037: hypothetical protein	FIG01242034	NA
scaffold1|size1664507	fig|6666666.156949.peg.1432	peg	scaffold1|size1664507_1302714_1301623	1302714	1301623	-	FIG01229074: hypothetical protein	FIG01229072	NA
scaffold1|size1664507	fig|6666666.156949.peg.1433	peg	scaffold1|size1664507_1303170_1302721	1303170	1302721	-	FIG01234025: hypothetical protein	FIG01234023	NA
scaffold1|size1664507	fig|6666666.156949.peg.1434	peg	scaffold1|size1664507_1303792_1303175	1303792	1303175	-	hypothetical protein	NA	NA
scaffold1|size1664507	fig|6666666.156949.peg.1435	peg	scaffold1|size1664507_1304420_1303797	1304420	1303797	-	hypothetical protein	NA	NA
scaffold1|size1664507	fig|6666666.156949.peg.1436	peg	scaffold1|size1664507_1305342_1304878	1305342	1304878	-	hypothetical protein	NA	NA
scaffold1|size1664507	fig|6666666.156949.peg.1437	peg	scaffold1|size1664507_1306453_1305440	1306453	1305440	-	hypothetical protein	NA	NA
scaffold1|size1664507	fig|6666666.156949.peg.1438	peg	scaffold1|size1664507_1306870_1306469	1306870	1306469	-	hypothetical protein	NA	NA
scaffold1|size1664507	fig|6666666.156949.peg.1439	peg	scaffold1|size1664507_1308321_1306885	1308321	1306885	-	hypothetical protein	NA	NA
scaffold1|size1664507	fig|6666666.156949.peg.1440	peg	scaffold1|size1664507_1309860_1308400	1309860	1308400	-	hypothetical protein	NA	NA
scaffold1|size1664507	fig|6666666.156949.peg.1441	peg	scaffold1|size1664507_1312352_1310658	1312352	1310658	-	Phage protein	NA	NA
scaffold1|size1664507	fig|6666666.156949.peg.1442	peg	scaffold1|size1664507_1313122_1312349	1313122	1312349	-	Thymidine kinase (EC 2.7.1.21)	FIG00000655	idu(1);pyrimidine_conversions
scaffold1|size1664507	fig|6666666.156949.peg.1443	peg	scaffold1|size1664507_1313717_1313124	1313717	1313124	-	hypothetical protein	NA	NA
scaffold1|size1664507	fig|6666666.156949.peg.1444	peg	scaffold1|size1664507_1313875_1313717	1313875	1313717	-	hypothetical protein	NA	NA
scaffold1|size1664507	fig|6666666.156949.peg.1445	peg	scaffold1|size1664507_1314233_1314090	1314233	1314090	-	hypothetical protein	NA	NA
scaffold1|size1664507	fig|6666666.156949.peg.1446	peg	scaffold1|size1664507_1314919_1317021	1314919	1317021	+	Ribonucleotide reductase of class Ib (aerobic), alpha subunit (EC 1.17.4.1)	FIG00001069	idu(1);Ribonucleotide_reduction
scaffold1|size1664507	fig|6666666.156949.peg.1447	peg	scaffold1|size1664507_1317137_1318126	1317137	1318126	+	Ribonucleotide reductase of class Ib (aerobic), beta subunit (EC 1.17.4.1)	FIG00000960	icw(1);Ribonucleotide_reduction
scaffold1|size1664507	fig|6666666.156949.peg.1448	peg	scaffold1|size1664507_1318401_1318643	1318401	1318643	+	hypothetical protein	NA	NA
scaffold1|size1664507	fig|6666666.156949.peg.1449	peg	scaffold1|size1664507_1318640_1319728	1318640	1319728	+	hypothetical protein	NA	NA
scaffold1|size1664507	fig|6666666.156949.peg.1450	peg	scaffold1|size1664507_1320002_1319760	1320002	1319760	-	hypothetical protein	NA	NA
scaffold1|size1664507	fig|6666666.156949.peg.1451	peg	scaffold1|size1664507_1321251_1320592	1321251	1320592	-	hypothetical protein	NA	NA
scaffold1|size1664507	fig|6666666.156949.peg.1452	peg	scaffold1|size1664507_1321545_1321330	1321545	1321330	-	hypothetical protein	NA	NA
scaffold1|size1664507	fig|6666666.156949.peg.1453	peg	scaffold1|size1664507_1322836_1322630	1322836	1322630	-	hypothetical protein	NA	NA
scaffold1|size1664507	fig|6666666.156949.peg.1454	peg	scaffold1|size1664507_1323318_1322869	1323318	1322869	-	hypothetical protein	NA	NA
scaffold1|size1664507	fig|6666666.156949.peg.1455	peg	scaffold1|size1664507_1324739_1323378	1324739	1323378	-	hypothetical protein	NA	NA
scaffold1|size1664507	fig|6666666.156949.peg.1456	peg	scaffold1|size1664507_1325397_1325669	1325397	1325669	+	hypothetical protein	NA	NA
scaffold1|size1664507	fig|6666666.156949.peg.1457	peg	scaffold1|size1664507_1325826_1326152	1325826	1326152	+	hypothetical protein	NA	NA
scaffold1|size1664507	fig|6666666.156949.peg.1458	peg	scaffold1|size1664507_1326318_1327556	1326318	1327556	+	hypothetical protein	NA	NA
scaffold1|size1664507	fig|6666666.156949.peg.1459	peg	scaffold1|size1664507_1327784_1328899	1327784	1328899	+	Peptidase T (EC 3.4.11.4)	NA	NA
scaffold1|size1664507	fig|6666666.156949.peg.1460	peg	scaffold1|size1664507_1330098_1330217	1330098	1330217	+	hypothetical protein	NA	NA
scaffold1|size1664507	fig|6666666.156949.peg.1461	peg	scaffold1|size1664507_1330615_1330896	1330615	1330896	+	hypothetical protein	NA	NA
scaffold1|size1664507	fig|6666666.156949.peg.1462	peg	scaffold1|size1664507_1331812_1332045	1331812	1332045	+	hypothetical protein	NA	NA
scaffold1|size1664507	fig|6666666.156949.peg.1463	peg	scaffold1|size1664507_1332519_1332800	1332519	1332800	+	hypothetical protein	NA	NA
scaffold1|size1664507	fig|6666666.156949.peg.1464	peg	scaffold1|size1664507_1333082_1333324	1333082	1333324	+	hypothetical protein	NA	NA
scaffold1|size1664507	fig|6666666.156949.peg.1465	peg	scaffold1|size1664507_1333343_1333540	1333343	1333540	+	hypothetical protein	NA	NA
scaffold1|size1664507	fig|6666666.156949.peg.1466	peg	scaffold1|size1664507_1334479_1336191	1334479	1336191	+	COG0553: Superfamily II DNA/RNA helicases, SNF2 family	NA	NA
scaffold1|size1664507	fig|6666666.156949.peg.1467	peg	scaffold1|size1664507_1336823_1337596	1336823	1337596	+	hypothetical protein	NA	NA
scaffold1|size1664507	fig|6666666.156949.peg.1468	peg	scaffold1|size1664507_1337593_1337904	1337593	1337904	+	hypothetical protein	NA	NA
scaffold1|size1664507	fig|6666666.156949.peg.1469	peg	scaffold1|size1664507_1338532_1338918	1338532	1338918	+	hypothetical protein	NA	NA
scaffold1|size1664507	fig|6666666.156949.peg.1470	peg	scaffold1|size1664507_1339033_1340109	1339033	1340109	+	hypothetical protein	NA	NA
scaffold1|size1664507	fig|6666666.156949.peg.1471	peg	scaffold1|size1664507_1340109_1340879	1340109	1340879	+	FIG01227861: hypothetical protein	FIG01227860	NA
scaffold1|size1664507	fig|6666666.156949.peg.1472	peg	scaffold1|size1664507_1341108_1341572	1341108	1341572	+	hypothetical protein	NA	NA
scaffold1|size1664507	fig|6666666.156949.peg.1473	peg	scaffold1|size1664507_1342138_1343427	1342138	1343427	+	FIG01242600: hypothetical protein	FIG01242595	NA
scaffold1|size1664507	fig|6666666.156949.peg.1474	peg	scaffold1|size1664507_1343439_1344512	1343439	1344512	+	DNA primase (EC 2.7.7.-)	FIG00019251	idu(1);CBSS-349161.4.peg.2417 idu(1);Macromolecular_synthesis_operon idu(1);DNA-replication
scaffold1|size1664507	fig|6666666.156949.peg.1475	peg	scaffold1|size1664507_1344661_1345236	1344661	1345236	+	hypothetical protein	NA	NA
scaffold1|size1664507	fig|6666666.156949.peg.1476	peg	scaffold1|size1664507_1345752_1346504	1345752	1346504	+	FIG01249871: hypothetical protein	FIG01249869	NA
scaffold1|size1664507	fig|6666666.156949.peg.1477	peg	scaffold1|size1664507_1346588_1349173	1346588	1349173	+	DNA polymerase I (EC 2.7.7.7)	FIG00000404	idu(1);DNA_Repair_Base_Excision icw(1);DNA-replication
scaffold1|size1664507	fig|6666666.156949.peg.1478	peg	scaffold1|size1664507_1349285_1349662	1349285	1349662	+	hypothetical protein	NA	NA
scaffold1|size1664507	fig|6666666.156949.peg.1479	peg	scaffold1|size1664507_1350210_1351376	1350210	1351376	+	Integrase	NA	NA
scaffold1|size1664507	fig|6666666.156949.rna.9	rna	scaffold1|size1664507_1351662_1351591	1351662	1351591	-	tRNA-Val-GAC	NA	NA
scaffold1|size1664507	fig|6666666.156949.peg.1480	peg	scaffold1|size1664507_1351892_1353082	1351892	1353082	+	DUF819 domain-containing protein	FIG01325574	NA
scaffold1|size1664507	fig|6666666.156949.peg.1481	peg	scaffold1|size1664507_1353152_1353697	1353152	1353697	+	Ribosomal-protein-S5p-alanine acetyltransferase	FIG00000756	isu;Ribosome_biogenesis_bacterial isu;Ribosomal_protein_S5p_acylation
scaffold1|size1664507	fig|6666666.156949.peg.1482	peg	scaffold1|size1664507_1354865_1353729	1354865	1353729	-	Cystathionine beta-lyase (EC 4.4.1.8)	FIG00755081	isu;L-Cystine_Uptake_and_Metabolism icw(2);Methionine_Biosynthesis
scaffold1|size1664507	fig|6666666.156949.peg.1483	peg	scaffold1|size1664507_1356015_1354894	1356015	1354894	-	Cystathionine gamma-synthase (EC 2.5.1.48) @ O-acetylhomoserine sulfhydrylase (EC 2.5.1.49)	NA	icw(2);L-Cystine_Uptake_and_Metabolism isu;Methionine_Biosynthesis icw(1);Methionine_Biosynthesis
scaffold1|size1664507	fig|6666666.156949.peg.1484	peg	scaffold1|size1664507_1356188_1356036	1356188	1356036	-	Cystathionine gamma-synthase (EC 2.5.1.48)	FIG00000660	icw(2);L-Cystine_Uptake_and_Metabolism icw(1);Methionine_Biosynthesis
scaffold1|size1664507	fig|6666666.156949.peg.1485	peg	scaffold1|size1664507_1356371_1357093	1356371	1357093	+	Putative acetyl esterase YjcH (EC 3.1.1.-)	FIG00002429	NA
scaffold1|size1664507	fig|6666666.156949.peg.1486	peg	scaffold1|size1664507_1357130_1357645	1357130	1357645	+	2H phosphoesterase superfamily protein Bsu1186 (yjcG)	FIG00003557	isu;RNA_processing_orphans
scaffold1|size1664507	fig|6666666.156949.peg.1487	peg	scaffold1|size1664507_1357649_1358071	1357649	1358071	+	GNAT family acetyltransferase YjcF	FIG00003802	NA
scaffold1|size1664507	fig|6666666.156949.peg.1488	peg	scaffold1|size1664507_1358398_1358144	1358398	1358144	-	FIG01226358: hypothetical protein	FIG01226353	NA
scaffold1|size1664507	fig|6666666.156949.peg.1489	peg	scaffold1|size1664507_1358515_1360794	1358515	1360794	+	putative ATP-dependent DNA helicase YjcD	FIG01304430	isu;DNA_repair,_bacterial_UvrD_and_related_helicases
scaffold1|size1664507	fig|6666666.156949.peg.1490	peg	scaffold1|size1664507_1361122_1360868	1361122	1360868	-	FIG01228645: hypothetical protein	FIG01228644	NA
scaffold1|size1664507	fig|6666666.156949.peg.1491	peg	scaffold1|size1664507_1361404_1361255	1361404	1361255	-	hypothetical protein	NA	NA
scaffold1|size1664507	fig|6666666.156949.peg.1492	peg	scaffold1|size1664507_1361692_1361486	1361692	1361486	-	FIG01233980: hypothetical protein	FIG01233978	NA
scaffold1|size1664507	fig|6666666.156949.peg.1493	peg	scaffold1|size1664507_1361716_1361949	1361716	1361949	+	FIG01228815: hypothetical protein	FIG01747726	NA
scaffold1|size1664507	fig|6666666.156949.peg.1494	peg	scaffold1|size1664507_1362330_1361974	1362330	1361974	-	Integral membrane protein	FIG01956050	NA
scaffold1|size1664507	fig|6666666.156949.peg.1495	peg	scaffold1|size1664507_1362490_1362876	1362490	1362876	+	Spore coat protein V	FIG00181848	NA
scaffold1|size1664507	fig|6666666.156949.peg.1496	peg	scaffold1|size1664507_1362917_1363246	1362917	1363246	+	Spore coat protein W	FIG01333199	NA
scaffold1|size1664507	fig|6666666.156949.peg.1497	peg	scaffold1|size1664507_1363335_1363850	1363335	1363850	+	Spore coat protein X	FIG00041163	NA
scaffold1|size1664507	fig|6666666.156949.peg.1498	peg	scaffold1|size1664507_1364001_1364489	1364001	1364489	+	Spore coat protein Y	FIG00148776	NA
scaffold1|size1664507	fig|6666666.156949.peg.1499	peg	scaffold1|size1664507_1364617_1365063	1364617	1365063	+	Spore coat protein Y	NA	NA
scaffold1|size1664507	fig|6666666.156949.peg.1500	peg	scaffold1|size1664507_1365834_1365157	1365834	1365157	-	unknown	NA	NA
scaffold1|size1664507	fig|6666666.156949.peg.1501	peg	scaffold1|size1664507_1366717_1365941	1366717	1365941	-	Enoyl-[acyl-carrier-protein] reductase [NADH] (EC 1.3.1.9)	FIG00000524	isu;Fatty_Acid_Biosynthesis_FASII
scaffold1|size1664507	fig|6666666.156949.peg.1502	peg	scaffold1|size1664507_1367668_1366853	1367668	1366853	-	Phosphomethylpyrimidine kinase (EC 2.7.4.7)	NA	isu;5-FCL-like_protein isu;Thiamin_biosynthesis
scaffold1|size1664507	fig|6666666.156949.peg.1503	peg	scaffold1|size1664507_1368697_1367687	1368697	1367687	-	Sulfur carrier protein adenylyltransferase ThiF	FIG00001002	icw(2);Thiamin_biosynthesis
scaffold1|size1664507	fig|6666666.156949.peg.1504	peg	scaffold1|size1664507_1369458_1368694	1369458	1368694	-	Thiazole biosynthesis protein ThiG	NA	icw(4);Thiamin_biosynthesis
scaffold1|size1664507	fig|6666666.156949.peg.1505	peg	scaffold1|size1664507_1369664_1369461	1369664	1369461	-	Sulfur carrier protein ThiS	FIG00058747	icw(6);Thiamin_biosynthesis
scaffold1|size1664507	fig|6666666.156949.peg.1506	peg	scaffold1|size1664507_1370770_1369661	1370770	1369661	-	Glycine oxidase ThiO (EC 1.4.3.19)	FIG00001017	icw(3);Thiamin_biosynthesis
scaffold1|size1664507	fig|6666666.156949.peg.1507	peg	scaffold1|size1664507_1371371_1370754	1371371	1370754	-	Thiamin-phosphate pyrophosphorylase (EC 2.5.1.3)	FIG00000407	icw(2);5-FCL-like_protein icw(5);Thiamin_biosynthesis
scaffold1|size1664507	fig|6666666.156949.peg.1508	peg	scaffold1|size1664507_1372056_1371346	1372056	1371346	-	Thiaminase II (EC 3.5.99.2)	NA	icw(1);5-FCL-like_protein icw(1);Thiamin_biosynthesis
scaffold1|size1664507	fig|6666666.156949.peg.1509	peg	scaffold1|size1664507_1374149_1372305	1374149	1372305	-	Na+/H+ antiporter	FIG00008246	NA
scaffold1|size1664507	fig|6666666.156949.peg.1510	peg	scaffold1|size1664507_1374384_1375118	1374384	1375118	+	Diadenosine tetraphosphatase	FIG01348972	NA
scaffold1|size1664507	fig|6666666.156949.peg.1511	peg	scaffold1|size1664507_1376030_1375131	1376030	1375131	-	Similar to ribosomal large subunit pseudouridine synthase D, Bacillus subtilis YjbO type	FIG00014990	isu;Ribosome_biogenesis_bacterial isu;CBSS-222523.1.peg.1311 isu;RNA_pseudouridine_syntheses
scaffold1|size1664507	fig|6666666.156949.peg.1512	peg	scaffold1|size1664507_1376845_1376045	1376845	1376045	-	NAD kinase (EC 2.7.1.23)	FIG00000075	idu(1);NAD_and_NADP_cofactor_biosynthesis_global icw(2);CBSS-222523.1.peg.1311
scaffold1|size1664507	fig|6666666.156949.peg.1513	peg	scaffold1|size1664507_1377502_1376864	1377502	1376864	-	GTP pyrophosphokinase (EC 2.7.6.5)	FIG01969905	icw(3);CBSS-222523.1.peg.1311
scaffold1|size1664507	fig|6666666.156949.peg.1514	peg	scaffold1|size1664507_1377896_1377528	1377896	1377528	-	FIG01228403: hypothetical protein	FIG01228402	NA
scaffold1|size1664507	fig|6666666.156949.peg.1515	peg	scaffold1|size1664507_1378021_1378593	1378021	1378593	+	Adenylate cyclase	NA	icw(1);CBSS-222523.1.peg.1311
scaffold1|size1664507	fig|6666666.156949.peg.1516	peg	scaffold1|size1664507_1378608_1379342	1378608	1379342	+	Membrane-bound lytic murein transglycosylase D precursor (EC 3.2.1.-)	FIG00008294	idu(1);Murein_Hydrolases
scaffold1|size1664507	fig|6666666.156949.peg.1517	peg	scaffold1|size1664507_1379597_1379995	1379597	1379995	+	Hemoglobin-like protein HbO	FIG00001245	isu;Bacterial_hemoglobins
scaffold1|size1664507	fig|6666666.156949.peg.1518	peg	scaffold1|size1664507_1379992_1380891	1379992	1380891	+	YjbH-like, GTP pyrophosphokinase domain	FIG00002411	icw(4);CBSS-222523.1.peg.1311
scaffold1|size1664507	fig|6666666.156949.peg.1519	peg	scaffold1|size1664507_1381205_1381372	1381205	1381372	+	FIG01226944: hypothetical protein	FIG01226941	NA
scaffold1|size1664507	fig|6666666.156949.peg.1520	peg	scaffold1|size1664507_1383422_1381410	1383422	1381410	-	Oligoendopeptidase F (EC 3.4.24.-)	FIG00628107	NA
scaffold1|size1664507	fig|6666666.156949.peg.1521	peg	scaffold1|size1664507_1384620_1383469	1384620	1383469	-	Competence protein CoiA	FIG00002141	icw(1);Gram_Positive_Competence
scaffold1|size1664507	fig|6666666.156949.peg.1522	peg	scaffold1|size1664507_1385436_1384780	1385436	1384780	-	Negative regulator of genetic competence MecA	FIG00005813	idu(1);Gram_Positive_Competence
scaffold1|size1664507	fig|6666666.156949.peg.1523	peg	scaffold1|size1664507_1385713_1386369	1385713	1386369	+	membrane protein, putative	FIG00439698	NA
scaffold1|size1664507	fig|6666666.156949.peg.1524	peg	scaffold1|size1664507_1386807_1386412	1386807	1386412	-	Regulatory protein spx	FIG00646655	NA
scaffold1|size1664507	fig|6666666.156949.peg.1525	peg	scaffold1|size1664507_1387566_1386988	1387566	1386988	-	unknown	FIG01966475	NA
scaffold1|size1664507	fig|6666666.156949.peg.1526	peg	scaffold1|size1664507_1388911_1387730	1388911	1387730	-	FIG01226653: hypothetical protein	FIG01226652	NA
scaffold1|size1664507	fig|6666666.156949.peg.1527	peg	scaffold1|size1664507_1388933_1389049	1388933	1389049	+	hypothetical protein	NA	NA
scaffold1|size1664507	fig|6666666.156949.peg.1528	peg	scaffold1|size1664507_1389971_1389054	1389971	1389054	-	Oligopeptide transport ATP-binding protein OppF (TC 3.A.1.5.1)	FIG00018865	icw(3);ABC_transporter_oligopeptide_(TC_3.A.1.5.1)
scaffold1|size1664507	fig|6666666.156949.peg.1529	peg	scaffold1|size1664507_1391040_1389973	1391040	1389973	-	Oligopeptide transport system permease protein OppB (TC 3.A.1.5.1)	FIG00945384	icw(2);ABC_transporter_oligopeptide_(TC_3.A.1.5.1)
scaffold1|size1664507	fig|6666666.156949.peg.1530	peg	scaffold1|size1664507_1391971_1391054	1391971	1391054	-	Oligopeptide transport system permease protein OppC (TC 3.A.1.5.1)	FIG00455853	idu(1);ABC_transporter_oligopeptide_(TC_3.A.1.5.1)
scaffold1|size1664507	fig|6666666.156949.peg.1531	peg	scaffold1|size1664507_1392910_1391975	1392910	1391975	-	Oligopeptide transport system permease protein OppB (TC 3.A.1.5.1)	FIG00945384	icw(2);ABC_transporter_oligopeptide_(TC_3.A.1.5.1)
scaffold1|size1664507	fig|6666666.156949.peg.1532	peg	scaffold1|size1664507_1394655_1393018	1394655	1393018	-	Oligopeptide ABC transporter, periplasmic oligopeptide-binding protein OppA (TC 3.A.1.5.1)	FIG00432360	icw(6);ABC_transporter_oligopeptide_(TC_3.A.1.5.1) idu(2);Sex_pheromones_in_Enterococcus_faecalis_and_other_Firmicutes
scaffold1|size1664507	fig|6666666.156949.peg.1533	peg	scaffold1|size1664507_1395354_1396391	1395354	1396391	+	Tryptophanyl-tRNA synthetase (EC 6.1.1.2)	FIG00000055	isu;A_cluster_relating_to_Tryptophanyl-tRNA_synthetase isu;tRNA_aminoacylation,_Trp
scaffold1|size1664507	fig|6666666.156949.peg.1534	peg	scaffold1|size1664507_1397178_1396426	1397178	1396426	-	FIG01234419: hypothetical protein	FIG01225763	NA
scaffold1|size1664507	fig|6666666.156949.peg.1535	peg	scaffold1|size1664507_1398298_1397384	1398298	1397384	-	Oligopeptide transport system permease protein OppC (TC 3.A.1.5.1)	FIG00455853	idu(1);ABC_transporter_oligopeptide_(TC_3.A.1.5.1)
scaffold1|size1664507	fig|6666666.156949.peg.1536	peg	scaffold1|size1664507_1399264_1398314	1399264	1398314	-	Oligopeptide transport system permease protein OppB (TC 3.A.1.5.1)	FIG00945384	icw(1);ABC_transporter_oligopeptide_(TC_3.A.1.5.1)
scaffold1|size1664507	fig|6666666.156949.peg.1537	peg	scaffold1|size1664507_1400967_1399339	1400967	1399339	-	Oligopeptide ABC transporter, periplasmic oligopeptide-binding protein OppA (TC 3.A.1.5.1)	FIG00432360	icw(4);ABC_transporter_oligopeptide_(TC_3.A.1.5.1) idu(2);Sex_pheromones_in_Enterococcus_faecalis_and_other_Firmicutes
scaffold1|size1664507	fig|6666666.156949.peg.1538	peg	scaffold1|size1664507_1402044_1401055	1402044	1401055	-	Oligopeptide transport ATP-binding protein OppF (TC 3.A.1.5.1)	FIG00018865	icw(2);ABC_transporter_oligopeptide_(TC_3.A.1.5.1)
scaffold1|size1664507	fig|6666666.156949.peg.1539	peg	scaffold1|size1664507_1403027_1402041	1403027	1402041	-	Oligopeptide transport ATP-binding protein OppD (TC 3.A.1.5.1)	NA	icw(3);ABC_transporter_oligopeptide_(TC_3.A.1.5.1)
scaffold1|size1664507	fig|6666666.156949.peg.1540	peg	scaffold1|size1664507_1404004_1403219	1404004	1403219	-	FIG01225411: hypothetical protein	FIG01225410	NA
scaffold1|size1664507	fig|6666666.156949.peg.1541	peg	scaffold1|size1664507_1405321_1404080	1405321	1404080	-	3-oxoacyl-[acyl-carrier-protein] synthase, KASII (EC 2.3.1.179)	FIG00002246	NA
scaffold1|size1664507	fig|6666666.156949.peg.1542	peg	scaffold1|size1664507_1406282_1405344	1406282	1405344	-	3-oxoacyl-[acyl-carrier-protein] synthase, KASIII (EC 2.3.1.180)	FIG00015100	NA
scaffold1|size1664507	fig|6666666.156949.peg.1543	peg	scaffold1|size1664507_1406453_1406683	1406453	1406683	+	unknown	NA	NA
scaffold1|size1664507	fig|6666666.156949.peg.1544	peg	scaffold1|size1664507_1406904_1406713	1406904	1406713	-	Possible repressor of comG operon	FIG01225606	NA
scaffold1|size1664507	fig|6666666.156949.peg.1545	peg	scaffold1|size1664507_1407872_1406919	1407872	1406919	-	positive regulator of comK	FIG00882218	NA
scaffold1|size1664507	fig|6666666.156949.peg.1546	peg	scaffold1|size1664507_1408519_1407962	1408519	1407962	-	FIG01287439: hypothetical protein	FIG01227816	NA
scaffold1|size1664507	fig|6666666.156949.peg.1547	peg	scaffold1|size1664507_1408647_1408504	1408647	1408504	-	hypothetical protein	NA	NA
scaffold1|size1664507	fig|6666666.156949.peg.1548	peg	scaffold1|size1664507_1409335_1408601	1409335	1408601	-	HMP-PP hydrolase (pyridoxal phosphatase) Cof, detected in genetic screen for thiamin metabolic genes (PMID:15292217)	FIG00002113	NA
scaffold1|size1664507	fig|6666666.156949.peg.1549	peg	scaffold1|size1664507_1409585_1409770	1409585	1409770	+	Putative uncharacterized protein GBAA1178	FIG01226991	NA
scaffold1|size1664507	fig|6666666.156949.peg.1550	peg	scaffold1|size1664507_1409995_1409816	1409995	1409816	-	FIG01235373: hypothetical protein	FIG01235372	NA
scaffold1|size1664507	fig|6666666.156949.peg.1551	peg	scaffold1|size1664507_1411040_1410081	1411040	1410081	-	Ornithine carbamoyltransferase (EC 2.1.3.3)	FIG00000084	isu;Arginine_Biosynthesis_--_gjo isu;Arginine_Biosynthesis_extended isu;Arginine_and_Ornithine_Degradation isu;Arginine_Deiminase_Pathway
scaffold1|size1664507	fig|6666666.156949.peg.1552	peg	scaffold1|size1664507_1414120_1411028	1414120	1411028	-	Carbamoyl-phosphate synthase large chain (EC 6.3.5.5)	FIG00000111	icw(1);Macromolecular_synthesis_operon icw(1);De_Novo_Pyrimidine_Synthesis
scaffold1|size1664507	fig|6666666.156949.peg.1553	peg	scaffold1|size1664507_1415174_1414113	1415174	1414113	-	Carbamoyl-phosphate synthase small chain (EC 6.3.5.5)	FIG00000130	idu(1);Macromolecular_synthesis_operon idu(1);De_Novo_Pyrimidine_Synthesis
scaffold1|size1664507	fig|6666666.156949.peg.1554	peg	scaffold1|size1664507_1416402_1415245	1416402	1415245	-	Acetylornithine aminotransferase (EC 2.6.1.11)	FIG00001168	icw(3);Arginine_Biosynthesis_--_gjo icw(3);Arginine_Biosynthesis_extended
scaffold1|size1664507	fig|6666666.156949.peg.1555	peg	scaffold1|size1664507_1417175_1416399	1417175	1416399	-	Acetylglutamate kinase (EC 2.7.2.8)	FIG00000383	icw(1);Arginine_Biosynthesis_--_gjo icw(1);Arginine_Biosynthesis_extended
scaffold1|size1664507	fig|6666666.156949.peg.1556	peg	scaffold1|size1664507_1418410_1417190	1418410	1417190	-	Glutamate N-acetyltransferase (EC 2.3.1.35) / N-acetylglutamate synthase (EC 2.3.1.1)	FIG00000630	isu;Arginine_Biosynthesis_--_gjo icw(1);Arginine_Biosynthesis_--_gjo isu;Arginine_Biosynthesis_extended icw(1);Arginine_Biosynthesis_extended
scaffold1|size1664507	fig|6666666.156949.peg.1557	peg	scaffold1|size1664507_1419467_1418430	1419467	1418430	-	N-acetyl-gamma-glutamyl-phosphate reductase (EC 1.2.1.38)	FIG00000358	icw(2);Arginine_Biosynthesis_--_gjo icw(2);Arginine_Biosynthesis_extended
scaffold1|size1664507	fig|6666666.156949.peg.1558	peg	scaffold1|size1664507_1420212_1419673	1420212	1419673	-	FIG01239489: hypothetical protein	FIG01239487	NA
scaffold1|size1664507	fig|6666666.156949.peg.1559	peg	scaffold1|size1664507_1421642_1420212	1421642	1420212	-	oxidoreductase, FAD-binding	FIG01339311	NA
scaffold1|size1664507	fig|6666666.156949.peg.1560	peg	scaffold1|size1664507_1421874_1421704	1421874	1421704	-	FIG01246996: hypothetical protein	FIG01246994	NA
scaffold1|size1664507	fig|6666666.156949.peg.1561	peg	scaffold1|size1664507_1422247_1421939	1422247	1421939	-	probably aromatic ring hydroxylating enzyme, evidenced by COGnitor; PaaD-like protein (DUF59) involved in Fe-S cluster assembly	FIG00138514	isu;Scaffold_proteins_for_[4Fe-4S]_cluster_assembly_(MRP_family) isu;Iron-sulfur_cluster_assembly
scaffold1|size1664507	fig|6666666.156949.peg.1562	peg	scaffold1|size1664507_1423078_1422311	1423078	1422311	-	Putative hydrolase of the alpha/beta superfamily	FIG00627857	NA
scaffold1|size1664507	fig|6666666.156949.peg.1563	peg	scaffold1|size1664507_1423199_1424011	1423199	1424011	+	FIG002540: Haloacid dehalogenase-like hydrolase	FIG01228392	NA
scaffold1|size1664507	fig|6666666.156949.peg.1564	peg	scaffold1|size1664507_1424268_1424465	1424268	1424465	+	FIG01226075: hypothetical protein	FIG01226074	NA
scaffold1|size1664507	fig|6666666.156949.peg.1565	peg	scaffold1|size1664507_1424951_1424496	1424951	1424496	-	intracellular proteinase inhibitor BsuPI	FIG01318880	NA
scaffold1|size1664507	fig|6666666.156949.peg.1566	peg	scaffold1|size1664507_1425812_1424970	1425812	1424970	-	Arginine/ornithine antiporter ArcD	FIG00001166	idu(4);Arginine_and_Ornithine_Degradation idu(4);Arginine_Deiminase_Pathway idu(4);Polyamine_Metabolism
scaffold1|size1664507	fig|6666666.156949.peg.1567	peg	scaffold1|size1664507_1425950_1426801	1425950	1426801	+	DegV family protein	FIG01328543	NA
scaffold1|size1664507	fig|6666666.156949.peg.1568	peg	scaffold1|size1664507_1428407_1426848	1428407	1426848	-	Zinc metalloproteinase precursor (EC 3.4.24.29) / aureolysin	FIG01960663	idu(1);Listeria_Pathogenicity_Island_LIPI-1_extended
scaffold1|size1664507	fig|6666666.156949.peg.1569	peg	scaffold1|size1664507_1428892_1428599	1428892	1428599	-	FIG01245765: hypothetical protein	FIG01245764	NA
scaffold1|size1664507	fig|6666666.156949.peg.1570	peg	scaffold1|size1664507_1429493_1428912	1429493	1428912	-	FIG01233708: hypothetical protein	FIG01233707	NA
scaffold1|size1664507	fig|6666666.156949.peg.1571	peg	scaffold1|size1664507_1429837_1429490	1429837	1429490	-	Transcriptional regulator, PadR family	FIG00002474	idu(3);CBSS-1352.1.peg.856
scaffold1|size1664507	fig|6666666.156949.peg.1572	peg	scaffold1|size1664507_1430139_1429993	1430139	1429993	-	hypothetical protein	NA	NA
scaffold1|size1664507	fig|6666666.156949.peg.1573	peg	scaffold1|size1664507_1430138_1430551	1430138	1430551	+	FIG01231817: hypothetical protein	FIG01231815	NA
scaffold1|size1664507	fig|6666666.156949.peg.1574	peg	scaffold1|size1664507_1430536_1431465	1430536	1431465	+	FIG01253646: hypothetical protein	FIG01740520	NA
scaffold1|size1664507	fig|6666666.156949.peg.1575	peg	scaffold1|size1664507_1431462_1432046	1431462	1432046	+	FIG01237632: hypothetical protein	FIG01237630	NA
scaffold1|size1664507	fig|6666666.156949.peg.1576	peg	scaffold1|size1664507_1432947_1432099	1432947	1432099	-	S1 RNA binding domain	FIG01304042	NA
scaffold1|size1664507	fig|6666666.156949.peg.1577	peg	scaffold1|size1664507_1433094_1433585	1433094	1433585	+	FIG001943: hypothetical protein YajQ	FIG00001943	isu;Broadly_distributed_proteins_not_in_subsystems
scaffold1|size1664507	fig|6666666.156949.peg.1578	peg	scaffold1|size1664507_1433899_1435737	1433899	1435737	+	5,10-methylenetetrahydrofolate reductase (EC 1.5.1.20) / Homolog of homocysteine-binding domain	FIG00010489	isu;5-FCL-like_protein isu;One-carbon_metabolism_by_tetrahydropterines isu;Serine-glyoxylate_cycle isu;Methionine_Biosynthesis
scaffold1|size1664507	fig|6666666.156949.peg.1579	peg	scaffold1|size1664507_1435828_1436277	1435828	1436277	+	acetyltransferase, GNAT family	FIG01315364	NA
scaffold1|size1664507	fig|6666666.156949.peg.1580	peg	scaffold1|size1664507_1436282_1437130	1436282	1437130	+	FIG01230618: hypothetical protein	FIG01230617	NA
scaffold1|size1664507	fig|6666666.156949.peg.1581	peg	scaffold1|size1664507_1437242_1438510	1437242	1438510	+	Multidrug and toxin extrusion (MATE) family efflux pump YdhE/NorM, homolog	FIG00452872	isu;Multidrug_Resistance_Efflux_Pumps
scaffold1|size1664507	fig|6666666.156949.peg.1582	peg	scaffold1|size1664507_1438519_1439634	1438519	1439634	+	Putative mandelate racemase STM3833	FIG01045126	NA
scaffold1|size1664507	fig|6666666.156949.peg.1583	peg	scaffold1|size1664507_1439685_1440359	1439685	1440359	+	membrane protein, putative	FIG00439698	NA
scaffold1|size1664507	fig|6666666.156949.peg.1584	peg	scaffold1|size1664507_1441162_1440404	1441162	1440404	-	Phosphosulfolactate synthase (EC 4.4.1.19)	FIG00050404	NA
scaffold1|size1664507	fig|6666666.156949.peg.1585	peg	scaffold1|size1664507_1441845_1441159	1441845	1441159	-	Probable 2-phosphosulfolactate phosphatase (EC 3.1.3.71)	FIG00528069	NA
scaffold1|size1664507	fig|6666666.156949.peg.1586	peg	scaffold1|size1664507_1442030_1442740	1442030	1442740	+	Phosphoadenylyl-sulfate reductase [thioredoxin] (EC 1.8.4.8) / Adenylyl-sulfate reductase [thioredoxin] (EC 1.8.4.10)	FIG01303877	icw(1);Cysteine_Biosynthesis icw(1);Inorganic_Sulfur_Assimilation icw(2);Inorganic_Sulfur_Assimilation
scaffold1|size1664507	fig|6666666.156949.peg.1587	peg	scaffold1|size1664507_1442853_1444022	1442853	1444022	+	Sulfate adenylyltransferase, dissimilatory-type (EC 2.7.7.4)	FIG01962692	icw(2);Inorganic_Sulfur_Assimilation
scaffold1|size1664507	fig|6666666.156949.peg.1588	peg	scaffold1|size1664507_1444019_1444618	1444019	1444618	+	Adenylylsulfate kinase (EC 2.7.1.25)	FIG00000821	idu(1);O-Methyl_Phosphoramidate_Capsule_Modification_in_Campylobacter idu(1);Cysteine_Biosynthesis idu(1);Inorganic_Sulfur_Assimilation
scaffold1|size1664507	fig|6666666.156949.peg.1589	peg	scaffold1|size1664507_1445452_1444646	1445452	1444646	-	Non-heme chloroperoxidase (EC 1.11.1.10)	FIG01225742	NA
scaffold1|size1664507	fig|6666666.156949.peg.1590	peg	scaffold1|size1664507_1445658_1446296	1445658	1446296	+	FIG01231088: hypothetical protein	FIG01231086	NA
scaffold1|size1664507	fig|6666666.156949.peg.1591	peg	scaffold1|size1664507_1447752_1446304	1447752	1446304	-	Transcriptional regulator, GntR family domain / Aspartate aminotransferase (EC 2.6.1.1)	FIG00005520	idu(7);Glutamine,_Glutamate,_Aspartate_and_Asparagine_Biosynthesis idu(7);Threonine_and_Homoserine_Biosynthesis
scaffold1|size1664507	fig|6666666.156949.peg.1592	peg	scaffold1|size1664507_1447875_1448486	1447875	1448486	+	Transporter, LysE family	FIG00731583	NA
scaffold1|size1664507	fig|6666666.156949.peg.1593	peg	scaffold1|size1664507_1448461_1449045	1448461	1449045	+	DinB	FIG01239586	NA
scaffold1|size1664507	fig|6666666.156949.peg.1594	peg	scaffold1|size1664507_1450123_1449119	1450123	1449119	-	Myo-inositol 2-dehydrogenase like (EC 1.1.1.18)	FIG01472288	NA
scaffold1|size1664507	fig|6666666.156949.peg.1595	peg	scaffold1|size1664507_1450305_1450144	1450305	1450144	-	hypothetical protein	NA	NA
scaffold1|size1664507	fig|6666666.156949.peg.1596	peg	scaffold1|size1664507_1451346_1450333	1451346	1450333	-	Predicted transcriptional regulator of the myo-inositol catabolic operon	FIG00002272	idu(1);Inositol_catabolism
scaffold1|size1664507	fig|6666666.156949.peg.1597	peg	scaffold1|size1664507_1452227_1451364	1452227	1451364	-	Transcriptional regulator, AraC family	NA	NA
scaffold1|size1664507	fig|6666666.156949.peg.1598	peg	scaffold1|size1664507_1452351_1453718	1452351	1453718	+	Multi antimicrobial extrusion protein (Na(+)/drug antiporter), MATE family of MDR efflux pumps	FIG00000402	idu(1);Multidrug_Resistance_Efflux_Pumps
scaffold1|size1664507	fig|6666666.156949.peg.1599	peg	scaffold1|size1664507_1454551_1453748	1454551	1453748	-	Phytoene synthase (EC 2.5.1.32)	FIG00000928	isu;CBSS-320388.3.peg.3759 isu;Proteorhodopsin
scaffold1|size1664507	fig|6666666.156949.peg.1600	peg	scaffold1|size1664507_1454805_1455284	1454805	1455284	+	FIG01225809: hypothetical protein	FIG01225808	NA
scaffold1|size1664507	fig|6666666.156949.peg.1601	peg	scaffold1|size1664507_1457257_1455413	1457257	1455413	-	Asparagine synthetase [glutamine-hydrolyzing] (EC 6.3.5.4) YisO	FIG01304642	isu;Glutamine,_Glutamate,_Aspartate_and_Asparagine_Biosynthesis
scaffold1|size1664507	fig|6666666.156949.peg.1602	peg	scaffold1|size1664507_1457427_1457984	1457427	1457984	+	Uncharacterized protein yisN, only in Bacillus	FIG01311554	NA
scaffold1|size1664507	fig|6666666.156949.peg.1603	peg	scaffold1|size1664507_1460717_1458015	1460717	1458015	-	FIG01241072: hypothetical protein	FIG01241071	NA
scaffold1|size1664507	fig|6666666.156949.peg.1604	peg	scaffold1|size1664507_1461241_1460885	1461241	1460885	-	Uncharacterized protein UPF0344	FIG00002562	NA
scaffold1|size1664507	fig|6666666.156949.peg.1605	peg	scaffold1|size1664507_1462262_1461357	1462262	1461357	-	Fumarylacetoacetate hydrolase family protein	FIG00007658	idu(1);Gentisate_degradation idu(1);Salicylate_and_gentisate_catabolism
scaffold1|size1664507	fig|6666666.156949.peg.1606	peg	scaffold1|size1664507_1462417_1463340	1462417	1463340	+	Inner spore coat protein H	NA	NA
scaffold1|size1664507	fig|6666666.156949.peg.1607	peg	scaffold1|size1664507_1463486_1463656	1463486	1463656	+	Spo0E-like putative sporulation regulatory protein in grePA-PF operon	FIG00026841	icw(4);Spore_germination
scaffold1|size1664507	fig|6666666.156949.peg.1608	peg	scaffold1|size1664507_1463990_1463826	1463990	1463826	-	hypothetical protein	NA	NA
scaffold1|size1664507	fig|6666666.156949.peg.1609	peg	scaffold1|size1664507_1464079_1464300	1464079	1464300	+	Protein GerPA, required for proper assembly of spore coat, mutations lead to super-dormant spore	FIG00012480	icw(2);Spore_germination
scaffold1|size1664507	fig|6666666.156949.peg.1610	peg	scaffold1|size1664507_1464315_1464548	1464315	1464548	+	Protein GerPB, required for proper assembly of spore coat, mutations lead to super-dormant spore	FIG00012305	icw(5);Spore_germination
scaffold1|size1664507	fig|6666666.156949.peg.1611	peg	scaffold1|size1664507_1464572_1465189	1464572	1465189	+	Protein GerPC, required for proper assembly of spore coat, mutations lead to super-dormant spore	FIG00013245	icw(3);Spore_germination
scaffold1|size1664507	fig|6666666.156949.peg.1612	peg	scaffold1|size1664507_1465186_1465362	1465186	1465362	+	Protein GerPD, required for proper assembly of spore coat, mutations lead to super-dormant spore	FIG00012360	icw(1);Spore_germination
scaffold1|size1664507	fig|6666666.156949.peg.1613	peg	scaffold1|size1664507_1465422_1465763	1465422	1465763	+	Protein GerPE, required for proper assembly of spore coat, mutations lead to super-dormant spore	FIG00012103	isu;Spore_germination
scaffold1|size1664507	fig|6666666.156949.peg.1614	peg	scaffold1|size1664507_1465795_1466013	1465795	1466013	+	Protein GerPF, required for proper assembly of spore coat, mutations lead to super-dormant spore	FIG00012189	icw(6);Spore_germination
scaffold1|size1664507	fig|6666666.156949.peg.1615	peg	scaffold1|size1664507_1466352_1466050	1466352	1466050	-	FIG01230218: hypothetical protein	FIG01230216	NA
scaffold1|size1664507	fig|6666666.156949.peg.1616	peg	scaffold1|size1664507_1469758_1466366	1469758	1466366	-	Exonuclease SbcC	FIG01304601	icw(1);DNA_repair,_bacterial isu;Rad50-Mre11_DNA_repair_cluster
scaffold1|size1664507	fig|6666666.156949.peg.1617	peg	scaffold1|size1664507_1470930_1469755	1470930	1469755	-	Exonuclease SbcD	FIG00000782	isu;DNA_repair,_bacterial icw(1);Rad50-Mre11_DNA_repair_cluster
scaffold1|size1664507	fig|6666666.156949.peg.1618	peg	scaffold1|size1664507_1474700_1471002	1474700	1471002	-	ATP-dependent nuclease, subunit A	FIG00001547	icw(1);ATP-dependent_Nuclease
scaffold1|size1664507	fig|6666666.156949.peg.1619	peg	scaffold1|size1664507_1478187_1474687	1478187	1474687	-	ATP-dependent nuclease, subunit B	FIG00052730	isu;ATP-dependent_Nuclease
scaffold1|size1664507	fig|6666666.156949.peg.1620	peg	scaffold1|size1664507_1478371_1478808	1478371	1478808	+	FIG01225181: hypothetical protein	FIG01225180	NA
scaffold1|size1664507	fig|6666666.156949.peg.1621	peg	scaffold1|size1664507_1478927_1479253	1478927	1479253	+	Ferredoxin	FIG00001676	idu(2);Soluble_cytochromes_and_functionally_related_electron_carriers idu(2);Inorganic_Sulfur_Assimilation
scaffold1|size1664507	fig|6666666.156949.peg.1622	peg	scaffold1|size1664507_1481010_1479283	1481010	1479283	-	Oligopeptide ABC transporter, periplasmic oligopeptide-binding protein OppA (TC 3.A.1.5.1)	FIG00432360	idu(2);ABC_transporter_oligopeptide_(TC_3.A.1.5.1) idu(2);Sex_pheromones_in_Enterococcus_faecalis_and_other_Firmicutes
scaffold1|size1664507	fig|6666666.156949.peg.1623	peg	scaffold1|size1664507_1481124_1482329	1481124	1482329	+	YhjO	FIG01238903	NA
scaffold1|size1664507	fig|6666666.156949.peg.1624	peg	scaffold1|size1664507_1482436_1483590	1482436	1483590	+	FIG01228137: hypothetical protein	FIG01481576	NA
scaffold1|size1664507	fig|6666666.156949.peg.1625	peg	scaffold1|size1664507_1484793_1483804	1484793	1483804	-	NTD biosynthesis operon regulator NtdR	FIG00020962	icw(3);Neotrehalosadiamine_(NTD)_Biosynthesis_Operon
scaffold1|size1664507	fig|6666666.156949.peg.1626	peg	scaffold1|size1664507_1484897_1486222	1484897	1486222	+	NTD biosynthesis operon protein NtdA	FIG00025419	icw(1);Neotrehalosadiamine_(NTD)_Biosynthesis_Operon
scaffold1|size1664507	fig|6666666.156949.peg.1627	peg	scaffold1|size1664507_1486194_1487042	1486194	1487042	+	NTD biosynthesis operon putative hydrolase NtdB (EC 3.-.-.-)	FIG00022022	isu;Neotrehalosadiamine_(NTD)_Biosynthesis_Operon
scaffold1|size1664507	fig|6666666.156949.peg.1628	peg	scaffold1|size1664507_1487056_1488108	1487056	1488108	+	NTD biosynthesis operon putative oxidoreductase NtdC (EC 1.-.-.-)	FIG00023165	icw(2);Neotrehalosadiamine_(NTD)_Biosynthesis_Operon
scaffold1|size1664507	fig|6666666.156949.peg.1629	peg	scaffold1|size1664507_1488180_1489400	1488180	1489400	+	Glucose/mannose:H+ symporter GlcP	FIG00435857	isu;Trehalose_Uptake_and_Utilization
scaffold1|size1664507	fig|6666666.156949.peg.1630	peg	scaffold1|size1664507_1490065_1490262	1490065	1490262	+	hypothetical protein	NA	NA
scaffold1|size1664507	fig|6666666.156949.peg.1631	peg	scaffold1|size1664507_1490817_1490290	1490817	1490290	-	YhjH	FIG01234437	NA
scaffold1|size1664507	fig|6666666.156949.peg.1632	peg	scaffold1|size1664507_1492393_1490894	1492393	1490894	-	FAD-binding monooxygenase, PheA/TfdB family	FIG01312101	NA
scaffold1|size1664507	fig|6666666.156949.peg.1633	peg	scaffold1|size1664507_1493080_1492577,scaffold1|size1664507_1492573_1492505	1493080	1492505	-	Signal peptidase I (EC 3.4.21.89)	FIG00000015	idu(3);Signal_peptidase idu(3);CBSS-176299.4.peg.1292
scaffold1|size1664507	fig|6666666.156949.peg.1634	peg	scaffold1|size1664507_1493705_1493082	1493705	1493082	-	Alkaline phosphatase like protein	FIG00006211	idu(1);Phosphate_metabolism
scaffold1|size1664507	fig|6666666.156949.peg.1635	peg	scaffold1|size1664507_1493857_1494228	1493857	1494228	+	YhjD	FIG01232784	NA
scaffold1|size1664507	fig|6666666.156949.peg.1636	peg	scaffold1|size1664507_1494427_1494627	1494427	1494627	+	FIG01225797: hypothetical protein	FIG01225796	NA
scaffold1|size1664507	fig|6666666.156949.peg.1637	peg	scaffold1|size1664507_1494624_1496093	1494624	1496093	+	Acetate permease ActP (cation/acetate symporter)	FIG01347644	idu(1);Pyruvate_metabolism_II:_acetyl-CoA,_acetogenesis_from_pyruvate
scaffold1|size1664507	fig|6666666.156949.peg.1638	peg	scaffold1|size1664507_1496406_1496137	1496406	1496137	-	YhjA	FIG01241649	NA
scaffold1|size1664507	fig|6666666.156949.peg.1639	peg	scaffold1|size1664507_1496495_1496623	1496495	1496623	+	hypothetical protein	NA	NA
scaffold1|size1664507	fig|6666666.156949.peg.1640	peg	scaffold1|size1664507_1496623_1497522	1496623	1497522	+	FIG00553873: hypothetical protein	FIG00553873	NA
scaffold1|size1664507	fig|6666666.156949.peg.1641	peg	scaffold1|size1664507_1498147_1497569	1498147	1497569	-	Competence transcription factor	FIG01226330	NA
scaffold1|size1664507	fig|6666666.156949.peg.1642	peg	scaffold1|size1664507_1498440_1498673	1498440	1498673	+	hypothetical protein	NA	NA
scaffold1|size1664507	fig|6666666.156949.peg.1643	peg	scaffold1|size1664507_1499558_1498701	1499558	1498701	-	oxidoreductase, short chain dehydrogenase/reductase family	FIG01345757	NA
scaffold1|size1664507	fig|6666666.156949.peg.1644	peg	scaffold1|size1664507_1499670_1501199	1499670	1501199	+	Probable oxidoreductase, with Rieske iron-sulfur protein 2Fe-2S subunit	FIG01226847	NA
scaffold1|size1664507	fig|6666666.156949.peg.1645	peg	scaffold1|size1664507_1501254_1502636	1501254	1502636	+	methyl-accepting chemotaxis protein	FIG01251342	NA
scaffold1|size1664507	fig|6666666.156949.peg.1646	peg	scaffold1|size1664507_1502772_1503332	1502772	1503332	+	Substrate-specific component BioY of biotin ECF transporter	FIG00012067	idu(1);ECF_class_transporters idu(1);Biotin_biosynthesis
scaffold1|size1664507	fig|6666666.156949.peg.1647	peg	scaffold1|size1664507_1503339_1504778	1503339	1504778	+	O-succinylbenzoic acid--CoA ligase (EC 6.2.1.26)	FIG00000860	idu(2);Menaquinone_and_Phylloquinone_Biosynthesis idu(2);Menaquinone_and_Phylloquinone_Biosynthesis_--_gjo
scaffold1|size1664507	fig|6666666.156949.peg.1648	peg	scaffold1|size1664507_1504775_1505869	1504775	1505869	+	3-ketoacyl-CoA thiolase (EC 2.3.1.16) @ Acetyl-CoA acetyltransferase (EC 2.3.1.9)	FIG00000004	idu(1);CBSS-246196.1.peg.364 idu(1);n-Phenylalkanoic_acid_degradation idu(1);Ethylmalonyl-CoA_pathway_of_C2_assimilation,_GJO idu(1);Polyhydroxybutyrate_metabolism idu(1);Polyhydroxybutyrate_metabolism idu(1);Isoleucine_degradation idu(1);Fatty_acid_metabolism_cluster icw(1);Biotin_biosynthesis idu(1);Isoprenoid_Biosynthesis idu(1);Butyrate_metabolism_cluster idu(1);Serine-glyoxylate_cycle idu(1)…
scaffold1|size1664507	fig|6666666.156949.peg.1649	peg	scaffold1|size1664507_1505940_1506521	1505940	1506521	+	Predicted broad substrate specificity phosphatase	FIG00011548	isu;Phosphoglycerate_mutase_protein_family
scaffold1|size1664507	fig|6666666.156949.peg.1650	peg	scaffold1|size1664507_1507524_1506553	1507524	1506553	-	Heme ABC type transporter HtsABC, heme-binding protein	FIG00019092	idu(1);Heme,_hemin_uptake_and_utilization_systems_in_GramPositives
scaffold1|size1664507	fig|6666666.156949.peg.1651	peg	scaffold1|size1664507_1507721_1507602	1507721	1507602	-	hypothetical protein	NA	NA
scaffold1|size1664507	fig|6666666.156949.peg.1652	peg	scaffold1|size1664507_1508733_1507741	1508733	1507741	-	YhdH, a putative quinone oxidoreductase	NA	isu;Quinone_oxidoreductase_family
scaffold1|size1664507	fig|6666666.156949.peg.1653	peg	scaffold1|size1664507_1509254_1508805	1509254	1508805	-	FIG01232193: hypothetical protein	FIG01232192	NA
scaffold1|size1664507	fig|6666666.156949.peg.1654	peg	scaffold1|size1664507_1509440_1509288	1509440	1509288	-	FIG01230435: hypothetical protein	FIG01230432	NA
scaffold1|size1664507	fig|6666666.156949.peg.1655	peg	scaffold1|size1664507_1509688_1510833	1509688	1510833	+	serine alkaline protease (subtilisin E)( EC:3.4.21.62 )	FIG01230769	NA
scaffold1|size1664507	fig|6666666.156949.peg.1656	peg	scaffold1|size1664507_1512152_1510872	1512152	1510872	-	peptidase, M48 family	FIG01332365	NA
scaffold1|size1664507	fig|6666666.156949.peg.1657	peg	scaffold1|size1664507_1512283_1512696	1512283	1512696	+	FIG01237402: hypothetical protein	FIG01237396	NA
scaffold1|size1664507	fig|6666666.156949.peg.1658	peg	scaffold1|size1664507_1514324_1512735	1514324	1512735	-	O-succinylbenzoic acid--CoA ligase (EC 6.2.1.26)	FIG00000860	idu(2);Menaquinone_and_Phylloquinone_Biosynthesis idu(2);Menaquinone_and_Phylloquinone_Biosynthesis_--_gjo
scaffold1|size1664507	fig|6666666.156949.peg.1659	peg	scaffold1|size1664507_1515038_1514394	1515038	1514394	-	Conserved protein YhfK	FIG01232065	NA
scaffold1|size1664507	fig|6666666.156949.peg.1660	peg	scaffold1|size1664507_1516098_1515103	1516098	1515103	-	Lipoate-protein ligase A	FIG00000465	idu(1);Lipoic_acid_metabolism
scaffold1|size1664507	fig|6666666.156949.peg.1661	peg	scaffold1|size1664507_1516845_1516111	1516845	1516111	-	Metal-dependent hydrolases of the beta-lactamase superfamily I; PhnP protein	FIG01955808	isu;Beta-lactamase
scaffold1|size1664507	fig|6666666.156949.peg.1662	peg	scaffold1|size1664507_1516847_1517137	1516847	1517137	+	unknown	FIG01964702	NA
scaffold1|size1664507	fig|6666666.156949.peg.1663	peg	scaffold1|size1664507_1517408_1518697	1517408	1518697	+	Glutamate-aspartate carrier protein	NA	NA
scaffold1|size1664507	fig|6666666.156949.peg.1664	peg	scaffold1|size1664507_1519141_1518734	1519141	1518734	-	FIG01241191: hypothetical protein	FIG01241186	NA
scaffold1|size1664507	fig|6666666.156949.peg.1665	peg	scaffold1|size1664507_1520194_1519154	1520194	1519154	-	Deblocking aminopeptidase (EC 3.4.11.-)	FIG00001530	isu;Protein_degradation
scaffold1|size1664507	fig|6666666.156949.peg.1666	peg	scaffold1|size1664507_1520579_1520328	1520579	1520328	-	FIG01241681: hypothetical protein	FIG01241679	NA
scaffold1|size1664507	fig|6666666.156949.peg.1667	peg	scaffold1|size1664507_1521382_1520606	1521382	1520606	-	FIG01235610: hypothetical protein	FIG01235608	NA
scaffold1|size1664507	fig|6666666.156949.peg.1668	peg	scaffold1|size1664507_1521511_1522488	1521511	1522488	+	3-oxoacyl-[acyl-carrier-protein] synthase, KASIII (EC 2.3.1.180)	FIG00015100	NA
scaffold1|size1664507	fig|6666666.156949.peg.1669	peg	scaffold1|size1664507_1524858_1522531	1524858	1522531	-	FIG01232059: hypothetical protein	FIG01232058	NA
scaffold1|size1664507	fig|6666666.156949.peg.1670	peg	scaffold1|size1664507_1525504_1524929	1525504	1524929	-	TetR family transcriptional regulator BA1080	FIG01965792	NA
scaffold1|size1664507	fig|6666666.156949.peg.1671	peg	scaffold1|size1664507_1527063_1525651	1527063	1525651	-	Protoporphyrinogen IX oxidase, aerobic, HemY (EC 1.3.3.4)	FIG00068302	icw(1);Heme_and_Siroheme_Biosynthesis
scaffold1|size1664507	fig|6666666.156949.peg.1672	peg	scaffold1|size1664507_1528010_1527078	1528010	1527078	-	Ferrochelatase, protoheme ferro-lyase (EC 4.99.1.1)	FIG00000345	isu;Heme_and_Siroheme_Biosynthesis
scaffold1|size1664507	fig|6666666.156949.peg.1673	peg	scaffold1|size1664507_1529143_1528082	1529143	1528082	-	Uroporphyrinogen III decarboxylase (EC 4.1.1.37)	FIG00000428	icw(2);Heme_and_Siroheme_Biosynthesis
scaffold1|size1664507	fig|6666666.156949.peg.1674	peg	scaffold1|size1664507_1531409_1529265	1531409	1529265	-	Multimodular transpeptidase-transglycosylase (EC 2.4.1.129) (EC 3.4.-.-)	FIG00000011	idu(2);Peptidoglycan_Biosynthesis
scaffold1|size1664507	fig|6666666.156949.peg.1675	peg	scaffold1|size1664507_1531531_1532031	1531531	1532031	+	Uncharacterized protein, homolog of B.subtilis yhgC	FIG00002659	NA
scaffold1|size1664507	fig|6666666.156949.peg.1676	peg	scaffold1|size1664507_1532040_1532300	1532040	1532300	+	FIG01237082: hypothetical protein	FIG01237077	NA
scaffold1|size1664507	fig|6666666.156949.peg.1677	peg	scaffold1|size1664507_1532269_1532394	1532269	1532394	+	FIG01237082: hypothetical protein	FIG01237077	NA
scaffold1|size1664507	fig|6666666.156949.peg.1678	peg	scaffold1|size1664507_1532460_1533851	1532460	1533851	+	unknown	FIG01964634	NA
scaffold1|size1664507	fig|6666666.156949.peg.1679	peg	scaffold1|size1664507_1533863_1535113	1533863	1535113	+	Catalyzes the cleavage of p-aminobenzoyl-glutamate to p-aminobenzoate and glutamate, subunit A	FIG00001384	NA
scaffold1|size1664507	fig|6666666.156949.peg.1680	peg	scaffold1|size1664507_1535841_1535131	1535841	1535131	-	EcsC protein	FIG00012359	isu;EcsAB_transporter_affecting_expression_and_secretion_of_secretory_preproteins
scaffold1|size1664507	fig|6666666.156949.peg.1681	peg	scaffold1|size1664507_1537087_1535861	1537087	1535861	-	ABC transporter, permease protein EscB	FIG00009036	icw(3);EcsAB_transporter_affecting_expression_and_secretion_of_secretory_preproteins
scaffold1|size1664507	fig|6666666.156949.peg.1682	peg	scaffold1|size1664507_1537823_1537080	1537823	1537080	-	ABC transporter, ATP-binding protein EcsA	FIG00005968	icw(1);EcsAB_transporter_affecting_expression_and_secretion_of_secretory_preproteins
scaffold1|size1664507	fig|6666666.156949.peg.1683	peg	scaffold1|size1664507_1538310_1538747	1538310	1538747	+	Histidine triad (HIT) nucleotide-binding protein, similarity with At5g48545 and yeast YDL125C (HNT1)	FIG00229695	isu;CBSS-176279.3.peg.1262
scaffold1|size1664507	fig|6666666.156949.peg.1684	peg	scaffold1|size1664507_1538894_1539973	1538894	1539973	+	Phosphoserine aminotransferase (EC 2.6.1.52)	FIG00000445	isu;Pyridoxin_(Vitamin_B6)_Biosynthesis isu;Glycine_and_Serine_Utilization isu;Serine_Biosynthesis
scaffold1|size1664507	fig|6666666.156949.peg.1685	peg	scaffold1|size1664507_1540098_1540616	1540098	1540616	+	Substrate-specific component TrpP of tryptophan ECF transporter	FIG00077188	isu;ECF_class_transporters
scaffold1|size1664507	fig|6666666.156949.peg.1686	peg	scaffold1|size1664507_1540881_1540690	1540881	1540690	-	FIG01235971: hypothetical protein	FIG01235970	NA
scaffold1|size1664507	fig|6666666.156949.peg.1687	peg	scaffold1|size1664507_1541010_1541366	1541010	1541366	+	Hypothetical protein SAV1839	FIG00009245	icw(2);CBSS-176279.3.peg.1262 icw(2);EcsAB_transporter_affecting_expression_and_secretion_of_secretory_preproteins
scaffold1|size1664507	fig|6666666.156949.peg.1688	peg	scaffold1|size1664507_1541544_1542155	1541544	1542155	+	Protease production regulatory protein Hpr (ScoC)	FIG00013364	icw(1);EcsAB_transporter_affecting_expression_and_secretion_of_secretory_preproteins
scaffold1|size1664507	fig|6666666.156949.peg.1689	peg	scaffold1|size1664507_1542484_1542152	1542484	1542152	-	FIG01226172: hypothetical protein	FIG01226171	NA
scaffold1|size1664507	fig|6666666.156949.peg.1690	peg	scaffold1|size1664507_1542701_1543219	1542701	1543219	+	Hypothetical protein SAV1840	FIG00009870	icw(1);CBSS-176279.3.peg.1262
scaffold1|size1664507	fig|6666666.156949.peg.1691	peg	scaffold1|size1664507_1543345_1543509	1543345	1543509	+	FIG01227217: hypothetical protein	FIG01227216	NA
scaffold1|size1664507	fig|6666666.156949.peg.1692	peg	scaffold1|size1664507_1544019_1544894	1544019	1544894	+	Foldase protein PrsA precursor (EC 5.2.1.8) @ Foldase clustered with pyrimidine conversion	FIG00148852	icw(2);CBSS-176279.3.peg.1262 idu(1);Peptidyl-prolyl_cis-trans_isomerase icw(2);EcsAB_transporter_affecting_expression_and_secretion_of_secretory_preproteins
scaffold1|size1664507	fig|6666666.156949.peg.1693	peg	scaffold1|size1664507_1545147_1544935	1545147	1544935	-	FIG01233745: hypothetical protein	FIG01233744	NA
scaffold1|size1664507	fig|6666666.156949.peg.1694	peg	scaffold1|size1664507_1546216_1545272	1546216	1545272	-	3'->5' exoribonuclease Bsu YhaM	FIG01114325	isu;Ribonucleases_in_Bacillus icw(1);Rad50-Mre11_DNA_repair_cluster
scaffold1|size1664507	fig|6666666.156949.peg.1695	peg	scaffold1|size1664507_1549052_1546290	1549052	1546290	-	DNA double-strand break repair Rad50 ATPase	FIG00688894	isu;Rad50-Mre11_DNA_repair_cluster
scaffold1|size1664507	fig|6666666.156949.peg.1696	peg	scaffold1|size1664507_1550412_1549186	1550412	1549186	-	DNA repair exonuclease family protein YhaO	FIG01303866	isu;DNA_repair,_bacterial
scaffold1|size1664507	fig|6666666.156949.peg.1697	peg	scaffold1|size1664507_1551778_1550519	1551778	1550519	-	ABC transporter, permease protein (putative)	FIG01438392	NA
scaffold1|size1664507	fig|6666666.156949.peg.1698	peg	scaffold1|size1664507_1552667_1551771	1552667	1551771	-	ABC transporter, ATP-binding protein	FIG00744535	NA
scaffold1|size1664507	fig|6666666.156949.peg.1699	peg	scaffold1|size1664507_1552794_1552979	1552794	1552979	+	FIG01230527: hypothetical protein	FIG01230526	NA
scaffold1|size1664507	fig|6666666.156949.peg.1700	peg	scaffold1|size1664507_1553767_1553003,scaffold1|size1664507_1552999_1552970	1553767	1552970	-	Enoyl-CoA hydratase (EC 4.2.1.17)	FIG00033206	idu(3);n-Phenylalkanoic_acid_degradation idu(3);Polyhydroxybutyrate_metabolism idu(3);Isoleucine_degradation idu(3);Fatty_acid_metabolism_cluster idu(3);Butyrate_metabolism_cluster idu(3);Lysine_fermentation idu(3);Butanol_Biosynthesis idu(3);Acetyl-CoA_fermentation_to_Butyrate idu(3);Valine_degradation
scaffold1|size1664507	fig|6666666.156949.peg.1701	peg	scaffold1|size1664507_1553954_1554271	1553954	1554271	+	Uncharacterized protein yhaS	FIG01233087	NA
scaffold1|size1664507	fig|6666666.156949.peg.1702	peg	scaffold1|size1664507_1554335_1554832	1554335	1554832	+	trkA domain protein	NA	NA
scaffold1|size1664507	fig|6666666.156949.peg.1703	peg	scaffold1|size1664507_1554839_1556056	1554839	1556056	+	Na+/H+ antiporter	FIG00008246	NA
scaffold1|size1664507	fig|6666666.156949.peg.1704	peg	scaffold1|size1664507_1557606_1557592,scaffold1|size1664507_1557588_1556074	1557606	1556074	-	Coproporphyrinogen III oxidase, oxygen-independent (EC 1.3.99.22)	FIG00007556	isu;Heme_and_Siroheme_Biosynthesis
scaffold1|size1664507	fig|6666666.156949.peg.1705	peg	scaffold1|size1664507_1558557_1557691	1558557	1557691	-	Hydrolase (HAD superfamily)	NA	NA
scaffold1|size1664507	fig|6666666.156949.peg.1706	peg	scaffold1|size1664507_1559043_1560116	1559043	1560116	+	YhaZ	FIG01232705	NA
scaffold1|size1664507	fig|6666666.156949.peg.1707	peg	scaffold1|size1664507_1560513_1560160	1560513	1560160	-	Hypothetical protein SAV1845	FIG00742253	NA
scaffold1|size1664507	fig|6666666.156949.peg.1708	peg	scaffold1|size1664507_1561739_1560606	1561739	1560606	-	Hypothetical protein SAV1846	FIG01225405	NA
scaffold1|size1664507	fig|6666666.156949.peg.1709	peg	scaffold1|size1664507_1562006_1563097	1562006	1563097	+	FIG01225774: hypothetical protein	FIG01225773	NA
scaffold1|size1664507	fig|6666666.156949.peg.1710	peg	scaffold1|size1664507_1563087_1564448	1563087	1564448	+	FIG01227862: hypothetical protein	FIG01227861	NA
scaffold1|size1664507	fig|6666666.156949.peg.1711	peg	scaffold1|size1664507_1564607_1564816	1564607	1564816	+	FIG01231959: hypothetical protein	FIG01231954	NA
scaffold1|size1664507	fig|6666666.156949.peg.1712	peg	scaffold1|size1664507_1565026_1565226,scaffold1|size1664507_1565230_1565250	1565026	1565250	+	Small acid-soluble spore protein, alpha/beta family, SASP_1	NA	idu(1);Small_acid-soluble_spore_proteins
scaffold1|size1664507	fig|6666666.156949.peg.1713	peg	scaffold1|size1664507_1565334_1565459	1565334	1565459	+	unknown	NA	NA
scaffold1|size1664507	fig|6666666.156949.peg.1714	peg	scaffold1|size1664507_1565498_1566118	1565498	1566118	+	Flavohemoprotein (Hemoglobin-like protein) (Flavohemoglobin) (Nitric oxide dioxygenase) (EC 1.14.12.17)	FIG00000983	idu(1);Glutaredoxins idu(1);Flavohaemoglobin idu(1);Bacterial_hemoglobins
scaffold1|size1664507	fig|6666666.156949.peg.1715	peg	scaffold1|size1664507_1568189_1566168	1568189	1566168	-	Lipid A export ATP-binding/permease protein MsbA	FIG00017059	NA
scaffold1|size1664507	fig|6666666.156949.peg.1716	peg	scaffold1|size1664507_1569943_1568186	1569943	1568186	-	Lipid A export ATP-binding/permease protein MsbA	FIG00017059	NA
scaffold1|size1664507	fig|6666666.156949.peg.1717	peg	scaffold1|size1664507_1570311_1570063	1570311	1570063	-	unknown	NA	NA
scaffold1|size1664507	fig|6666666.156949.peg.1718	peg	scaffold1|size1664507_1570388_1570888	1570388	1570888	+	Stress response protein nhaX	FIG01233676	NA
scaffold1|size1664507	fig|6666666.156949.peg.1719	peg	scaffold1|size1664507_1571015_1572376	1571015	1572376	+	Na+/H+ antiporter NhaC	FIG01365272	NA
scaffold1|size1664507	fig|6666666.156949.peg.1720	peg	scaffold1|size1664507_1573267_1572419	1573267	1572419	-	D-alanine aminotransferase (EC 2.6.1.21)	FIG00001292	isu;Pyruvate_Alanine_Serine_Interconversions
scaffold1|size1664507	fig|6666666.156949.peg.1721	peg	scaffold1|size1664507_1573552_1574400	1573552	1574400	+	Peptidoglycan N-acetylglucosamine deacetylase (EC 3.5.1.-)	FIG00009450	idu(2);Polysaccharide_deacetylases
scaffold1|size1664507	fig|6666666.156949.peg.1722	peg	scaffold1|size1664507_1575167_1574424	1575167	1574424	-	NAD-dependent protein deacetylase of SIR2 family	FIG00008490	isu;Pyruvate_metabolism_II:_acetyl-CoA,_acetogenesis_from_pyruvate isu;Redox-dependent_regulation_of_nucleus_processes
scaffold1|size1664507	fig|6666666.156949.peg.1723	peg	scaffold1|size1664507_1576352_1575237	1576352	1575237	-	FIG01230350: hypothetical protein	FIG01230346	NA
scaffold1|size1664507	fig|6666666.156949.peg.1724	peg	scaffold1|size1664507_1576644_1576501	1576644	1576501	-	Uncharacterized protein yhdX	FIG01240479	NA
scaffold1|size1664507	fig|6666666.156949.peg.1725	peg	scaffold1|size1664507_1576842_1577573	1576842	1577573	+	Glycerophosphoryl diester phosphodiesterase (EC 3.1.4.46)	FIG00002239	idu(1);Glycerol_and_Glycerol-3-phosphate_Uptake_and_Utilization
scaffold1|size1664507	fig|6666666.156949.peg.1726	peg	scaffold1|size1664507_1577560_1577955	1577560	1577955	+	Protein crcB homolog 2	FIG01121065	NA
scaffold1|size1664507	fig|6666666.156949.peg.1727	peg	scaffold1|size1664507_1577952_1578308	1577952	1578308	+	camphor resistance protein CrcB	FIG01229035	NA
scaffold1|size1664507	fig|6666666.156949.peg.1728	peg	scaffold1|size1664507_1579707_1578322	1579707	1578322	-	Magnesium and cobalt efflux protein CorC	FIG00042627	icw(1);Magnesium_transport icw(1);Glycyl-tRNA_synthetase_containing_cluster icw(1);CBSS-56780.10.peg.1536
scaffold1|size1664507	fig|6666666.156949.peg.1729	peg	scaffold1|size1664507_1581215_1580034	1581215	1580034	-	Biosynthetic Aromatic amino acid aminotransferase alpha (EC 2.6.1.57) @ Aspartate aminotransferase (EC 2.6.1.1)	NA	idu(7);Glutamine,_Glutamate,_Aspartate_and_Asparagine_Biosynthesis isu;Phenylalanine_and_Tyrosine_Branches_from_Chorismate idu(7);Threonine_and_Homoserine_Biosynthesis
scaffold1|size1664507	fig|6666666.156949.peg.1730	peg	scaffold1|size1664507_1581258_1581803	1581258	1581803	+	HTH-type transcriptional regulator cueR	FIG00948320	NA
scaffold1|size1664507	fig|6666666.156949.peg.1731	peg	scaffold1|size1664507_1581873_1583198	1581873	1583198	+	Magnesium and cobalt efflux protein CorC	FIG00042627	icw(1);Magnesium_transport icw(1);Glycyl-tRNA_synthetase_containing_cluster icw(1);CBSS-56780.10.peg.1536
scaffold1|size1664507	fig|6666666.156949.peg.1732	peg	scaffold1|size1664507_1583866_1583267	1583866	1583267	-	1-acyl-sn-glycerol-3-phosphate acyltransferase (EC 2.3.1.51)	FIG00005243	isu;Ribosome_post-transcriptional_modification_and_chromosomal_segregation_cluster isu;Glycerolipid_and_Glycerophospholipid_Metabolism_in_Bacteria
scaffold1|size1664507	fig|6666666.156949.peg.1733	peg	scaffold1|size1664507_1584996_1584001	1584996	1584001	-	putative aldo/keto reductase	FIG01241582	NA
scaffold1|size1664507	fig|6666666.156949.peg.1734	peg	scaffold1|size1664507_1585193_1585684	1585193	1585684	+	RNA polymerase sigma-70 factor	FIG01303902	idu(2);CBSS-316057.3.peg.1308 idu(2);Transcription_initiation,_bacterial_sigma_factors
scaffold1|size1664507	fig|6666666.156949.peg.1735	peg	scaffold1|size1664507_1585677_1586750	1585677	1586750	+	Sigma-M negative effector	FIG01312573	NA
scaffold1|size1664507	fig|6666666.156949.peg.1736	peg	scaffold1|size1664507_1586738_1587028	1586738	1587028	+	YhdK	FIG01228831	NA
scaffold1|size1664507	fig|6666666.156949.peg.1737	peg	scaffold1|size1664507_1587487_1587059	1587487	1587059	-	unknown	NA	NA
scaffold1|size1664507	fig|6666666.156949.peg.1738	peg	scaffold1|size1664507_1587597_1589006	1587597	1589006	+	Predicted transcriptional regulator of pyridoxine metabolism	FIG00008736	idu(1);Pyridoxin_(Vitamin_B6)_Biosynthesis
scaffold1|size1664507	fig|6666666.156949.peg.1739	peg	scaffold1|size1664507_1590396_1589041	1590396	1589041	-	sodium-dependent transporter	FIG01338355	NA
scaffold1|size1664507	fig|6666666.156949.peg.1740	peg	scaffold1|size1664507_1591912_1590515	1591912	1590515	-	Amino acid transporters	FIG01316294	NA
scaffold1|size1664507	fig|6666666.156949.peg.1741	peg	scaffold1|size1664507_1593031_1592162	1593031	1592162	-	oxidoreductase, short chain dehydrogenase/reductase family	FIG01345757	NA
scaffold1|size1664507	fig|6666666.156949.peg.1742	peg	scaffold1|size1664507_1594205_1593105	1594205	1593105	-	Citrate synthase (si) (EC 2.3.3.1)	FIG00130344	idu(2);TCA_Cycle idu(2);Glyoxylate_bypass idu(2);Serine-glyoxylate_cycle
scaffold1|size1664507	fig|6666666.156949.peg.1743	peg	scaffold1|size1664507_1594314_1595189	1594314	1595189	+	negative regulation of the citrate synthase I gene (citA)	FIG01470536	NA
scaffold1|size1664507	fig|6666666.156949.peg.1744	peg	scaffold1|size1664507_1596263_1595259	1596263	1595259	-	Gamma-D-glutamyl-meso-diaminopimelate peptidase (EC 3.4.19.11)	FIG00181748	idu(2);Omega_peptidases_(EC_3.4.19.-)
scaffold1|size1664507	fig|6666666.156949.peg.1745	peg	scaffold1|size1664507_1596801_1598177	1596801	1598177	+	Alkaline phosphatase (EC 3.1.3.1)	FIG00000766	idu(1);Phosphate_metabolism
scaffold1|size1664507	fig|6666666.156949.peg.1746	peg	scaffold1|size1664507_1599613_1598207	1599613	1598207	-	Stage V sporulation protein involved in spore cortex synthesis (SpoVR)	FIG01970587	isu;Sporulation_gene_orphans
scaffold1|size1664507	fig|6666666.156949.peg.1747	peg	scaffold1|size1664507_1599776_1601302	1599776	1601302	+	FIG01234102: hypothetical protein	FIG01234101	NA
scaffold1|size1664507	fig|6666666.156949.peg.1748	peg	scaffold1|size1664507_1601409_1601849	1601409	1601849	+	Nitrite-sensitive transcriptional repressor NsrR	FIG00000872	isu;Oxidative_stress isu;Rrf2_family_transcriptional_regulators isu;Nitrosative_stress
scaffold1|size1664507	fig|6666666.156949.peg.1749	peg	scaffold1|size1664507_1602002_1603462	1602002	1603462	+	Gamma-D-glutamyl-meso-diaminopimelate peptidase (EC 3.4.19.11)	FIG00181748	idu(2);Omega_peptidases_(EC_3.4.19.-)
scaffold1|size1664507	fig|6666666.156949.peg.1750	peg	scaffold1|size1664507_1603827_1603504	1603827	1603504	-	unknown	NA	NA
scaffold1|size1664507	fig|6666666.156949.peg.1751	peg	scaffold1|size1664507_1604028_1604270	1604028	1604270	+	FIG01225983: hypothetical protein	FIG01225982	NA
scaffold1|size1664507	fig|6666666.156949.peg.1752	peg	scaffold1|size1664507_1604809_1604285	1604809	1604285	-	Azoreductase	FIG01243841	NA
scaffold1|size1664507	fig|6666666.156949.peg.1753	peg	scaffold1|size1664507_1605453_1604806	1605453	1604806	-	DNA-binding response regulator	FIG01031438	NA
scaffold1|size1664507	fig|6666666.156949.peg.1754	peg	scaffold1|size1664507_1606589_1605450	1606589	1605450	-	Nitrate/nitrite sensor protein (EC 2.7.3.-)	NA	isu;Nitrate_and_nitrite_ammonification
scaffold1|size1664507	fig|6666666.156949.peg.1755	peg	scaffold1|size1664507_1608483_1606738	1608483	1606738	-	Phosphomannomutase (EC 5.4.2.8)	FIG00001022	isu;Mannose_Metabolism
scaffold1|size1664507	fig|6666666.156949.peg.1756	peg	scaffold1|size1664507_1610282_1608615	1610282	1608615	-	Aerobic glycerol-3-phosphate dehydrogenase (EC 1.1.5.3)	FIG00043723	isu;Respiratory_dehydrogenases_1 icw(1);Glycerol_and_Glycerol-3-phosphate_Uptake_and_Utilization icw(1);Glycerolipid_and_Glycerophospholipid_Metabolism_in_Bacteria
scaffold1|size1664507	fig|6666666.156949.peg.1757	peg	scaffold1|size1664507_1611913_1610423	1611913	1610423	-	Glycerol kinase (EC 2.7.1.30)	FIG00075702	isu;Glycerol_and_Glycerol-3-phosphate_Uptake_and_Utilization isu;Glycerolipid_and_Glycerophospholipid_Metabolism_in_Bacteria
scaffold1|size1664507	fig|6666666.156949.peg.1758	peg	scaffold1|size1664507_1612756_1611932	1612756	1611932	-	Glycerol uptake facilitator protein	NA	isu;Osmoregulation icw(2);Glycerol_and_Glycerol-3-phosphate_Uptake_and_Utilization isu;Glycerol_fermentation_to_1,3-propanediol
scaffold1|size1664507	fig|6666666.156949.peg.1759	peg	scaffold1|size1664507_1613513_1613289,scaffold1|size1664507_1613285_1612935	1613513	1612935	-	Glycerol-3-phosphate responsive antiterminator (mRNA-binding)	NA	isu;Glycerol_and_Glycerol-3-phosphate_Uptake_and_Utilization
scaffold1|size1664507	fig|6666666.156949.peg.1760	peg	scaffold1|size1664507_1614878_1613541	1614878	1613541	-	Adenosylmethionine-8-amino-7-oxononanoate aminotransferase (EC 2.6.1.62)	FIG00012547	idu(2);Biotin_biosynthesis_Experimental idu(2);Biotin_biosynthesis
scaffold1|size1664507	fig|6666666.156949.peg.1761	peg	scaffold1|size1664507_1615088_1614921	1615088	1614921	-	hypothetical protein	NA	NA
scaffold1|size1664507	fig|6666666.156949.peg.1762	peg	scaffold1|size1664507_1616852_1615311	1616852	1615311	-	Aliphatic amidase AmiE (EC 3.5.1.4)	FIG00554419	NA
scaffold1|size1664507	fig|6666666.156949.peg.1763	peg	scaffold1|size1664507_1617530_1616868	1617530	1616868	-	hydrolase, haloacid dehalogenase-like family	FIG00672005	NA
scaffold1|size1664507	fig|6666666.156949.peg.1764	peg	scaffold1|size1664507_1618080_1617658	1618080	1617658	-	FIG01225757: hypothetical protein	FIG01225756	NA
scaffold1|size1664507	fig|6666666.156949.peg.1765	peg	scaffold1|size1664507_1618612_1618217	1618612	1618217	-	unknown	NA	NA
scaffold1|size1664507	fig|6666666.156949.peg.1766	peg	scaffold1|size1664507_1618723_1619631	1618723	1619631	+	Similar to ribosomal large subunit pseudouridine synthase D, Bacillus subtilis YhcT type	FIG00001743	isu;Ribosome_biogenesis_bacterial isu;RNA_pseudouridine_syntheses
scaffold1|size1664507	fig|6666666.156949.peg.1767	peg	scaffold1|size1664507_1620257_1619661	1620257	1619661	-	FIG01233477: hypothetical protein	FIG01233476	NA
scaffold1|size1664507	fig|6666666.156949.peg.1768	peg	scaffold1|size1664507_1623844_1620254	1623844	1620254	-	5'-nucleotidase (EC 3.1.3.5)	FIG00003394	idu(1);Purine_conversions idu(1);pyrimidine_conversions
scaffold1|size1664507	fig|6666666.156949.peg.1769	peg	scaffold1|size1664507_1625486_1624578	1625486	1624578	-	FIG01234098: hypothetical protein	FIG01234097	NA
scaffold1|size1664507	fig|6666666.156949.peg.1770	peg	scaffold1|size1664507_1626242_1625667	1626242	1625667	-	Lipoprotein yhcN precursor	FIG01369415	NA
scaffold1|size1664507	fig|6666666.156949.peg.1771	peg	scaffold1|size1664507_1626392_1626838	1626392	1626838	+	FIG01247185: hypothetical protein	FIG01247182	NA
scaffold1|size1664507	fig|6666666.156949.peg.1772	peg	scaffold1|size1664507_1627037_1626855	1627037	1626855	-	hypothetical protein	NA	NA
scaffold1|size1664507	fig|6666666.156949.peg.1773	peg	scaffold1|size1664507_1627230_1627547	1627230	1627547	+	Transcriptional regulator, PadR family	FIG00002474	idu(3);CBSS-1352.1.peg.856
scaffold1|size1664507	fig|6666666.156949.peg.1774	peg	scaffold1|size1664507_1627549_1628103	1627549	1628103	+	hypothetical protein	NA	NA
scaffold1|size1664507	fig|6666666.156949.peg.1775	peg	scaffold1|size1664507_1629792_1628401	1629792	1628401	-	L-cystine uptake protein TcyP	FIG00003381	isu;L-Cystine_Uptake_and_Metabolism
scaffold1|size1664507	fig|6666666.156949.peg.1776	peg	scaffold1|size1664507_1629964_1631043	1629964	1631043	+	GGDEF domain protein	FIG00450572	NA
scaffold1|size1664507	fig|6666666.156949.peg.1777	peg	scaffold1|size1664507_1631876_1631046	1631876	1631046	-	Methionine ABC transporter substrate-binding protein	FIG00047509	idu(1);Methionine_Degradation idu(1);Staphylococcal_pathogenicity_islands_SaPI idu(1);Methionine_Biosynthesis
scaffold1|size1664507	fig|6666666.156949.peg.1778	peg	scaffold1|size1664507_1632312_1632515	1632312	1632515	+	Cold shock protein CspD	FIG01304073	idu(1);Cold_shock,_CspA_family_of_proteins
scaffold1|size1664507	fig|6666666.156949.peg.1779	peg	scaffold1|size1664507_1633548_1632607	1633548	1632607	-	putative membrane protein	FIG00092051	NA
scaffold1|size1664507	fig|6666666.156949.peg.1780	peg	scaffold1|size1664507_1634458_1633541	1634458	1633541	-	ABC transporter, ATP-binding protein	FIG00744535	NA
scaffold1|size1664507	fig|6666666.156949.peg.1781	peg	scaffold1|size1664507_1635173_1634475	1635173	1634475	-	ABC transporter, ATP-binding protein	FIG00744535	NA
scaffold1|size1664507	fig|6666666.156949.peg.1782	peg	scaffold1|size1664507_1635540_1635175	1635540	1635175	-	Transcriptional regulator, GntR family	FIG00621925	NA
scaffold1|size1664507	fig|6666666.156949.peg.1783	peg	scaffold1|size1664507_1636304_1635543	1636304	1635543	-	Uncharacterized protein yhcE	FIG01236423	NA
scaffold1|size1664507	fig|6666666.156949.peg.1784	peg	scaffold1|size1664507_1636464_1636309	1636464	1636309	-	Uncharacterized protein yhcD	FIG01400317	NA
scaffold1|size1664507	fig|6666666.156949.peg.1785	peg	scaffold1|size1664507_1636838_1636464	1636838	1636464	-	FIG01232075: hypothetical protein	FIG01232074	NA
scaffold1|size1664507	fig|6666666.156949.peg.1786	peg	scaffold1|size1664507_1637381_1636851	1637381	1636851	-	FIG01233049: hypothetical protein	FIG01233047	NA
scaffold1|size1664507	fig|6666666.156949.peg.1787	peg	scaffold1|size1664507_1639002_1637404	1639002	1637404	-	Membrane component of multidrug resistance system	FIG00007749	icw(1);Multidrug_Resistance,_2-protein_version_Found_in_Gram-positive_bacteria
scaffold1|size1664507	fig|6666666.156949.peg.1788	peg	scaffold1|size1664507_1639708_1639043	1639708	1639043	-	Multidrug resistance protein [function not yet clear]	FIG00004668	isu;Multidrug_Resistance,_2-protein_version_Found_in_Gram-positive_bacteria
scaffold1|size1664507	fig|6666666.156949.peg.1789	peg	scaffold1|size1664507_1640208_1639744	1640208	1639744	-	YhbI	FIG01230331	NA
scaffold1|size1664507	fig|6666666.156949.peg.1790	peg	scaffold1|size1664507_1641546_1640368	1641546	1640368	-	UPF0229 protein YeaH	FIG01304092	isu;CBSS-188.1.peg.6720 isu;Unknown_carbohydrate_utilization_(_cluster_Ydj_)
scaffold1|size1664507	fig|6666666.156949.peg.1791	peg	scaffold1|size1664507_1643621_1641726	1643621	1641726	-	Serine protein kinase (prkA protein), P-loop containing	FIG00052904	icw(1);CBSS-188.1.peg.6720 icw(1);Unknown_carbohydrate_utilization_(_cluster_Ydj_)
scaffold1|size1664507	fig|6666666.156949.peg.1792	peg	scaffold1|size1664507_1643905_1643762	1643905	1643762	-	hypothetical protein	NA	NA
scaffold1|size1664507	fig|6666666.156949.peg.1793	peg	scaffold1|size1664507_1644678_1643971	1644678	1643971	-	FIG01236752: hypothetical protein	FIG01236749	NA
scaffold1|size1664507	fig|6666666.156949.peg.1794	peg	scaffold1|size1664507_1645403_1644690	1645403	1644690	-	FIG01236946: hypothetical protein	FIG01236943	NA
scaffold1|size1664507	fig|6666666.156949.peg.1795	peg	scaffold1|size1664507_1646035_1645394	1646035	1645394	-	FIG01231699: hypothetical protein	FIG01231698	NA
scaffold1|size1664507	fig|6666666.156949.peg.1796	peg	scaffold1|size1664507_1646634_1646161	1646634	1646161	-	tRNA (cytidine(34)-2'-O)-methyltransferase (EC 2.1.1.207)	FIG00001105	isu;RNA_methylation
scaffold1|size1664507	fig|6666666.156949.peg.1797	peg	scaffold1|size1664507_1647598_1646681	1647598	1646681	-	FIG01231642: hypothetical protein	FIG01226784	NA
scaffold1|size1664507	fig|6666666.156949.peg.1798	peg	scaffold1|size1664507_1648843_1647683	1648843	1647683	-	Epoxyqueuosine (oQ) reductase QueG	FIG00000517	isu;Scaffold_proteins_for_[4Fe-4S]_cluster_assembly_(MRP_family) isu;Queuosine-Archaeosine_Biosynthesis
scaffold1|size1664507	fig|6666666.156949.peg.1799	peg	scaffold1|size1664507_1648926_1649549	1648926	1649549	+	FIG01227611: hypothetical protein	FIG01227610	NA
scaffold1|size1664507	fig|6666666.156949.rna.10	rna	scaffold1|size1664507_1649713_1649643	1649713	1649643	-	tRNA-Gly-TCC	NA	NA
scaffold1|size1664507	fig|6666666.156949.peg.1800	peg	scaffold1|size1664507_1649904_1650107	1649904	1650107	+	HigA protein (antitoxin to HigB)	FIG00010902	idu(1);Toxin-antitoxin_replicon_stabilization_systems
scaffold1|size1664507	fig|6666666.156949.peg.1801	peg	scaffold1|size1664507_1650109_1650582	1650109	1650582	+	unknown	NA	NA
scaffold1|size1664507	fig|6666666.156949.peg.1802	peg	scaffold1|size1664507_1650869_1650600	1650869	1650600	-	SSU ribosomal protein S14p (S29e) @ SSU ribosomal protein S14p (S29e), zinc-independent	FIG00000066	NA
scaffold1|size1664507	fig|6666666.156949.peg.1803	peg	scaffold1|size1664507_1651625_1650981	1651625	1650981	-	Uncharacterized protein ygaN	FIG01229298	NA
scaffold1|size1664507	fig|6666666.156949.peg.1804	peg	scaffold1|size1664507_1652752_1651622	1652752	1651622	-	Alkanesulfonate monooxygenase (EC 1.14.14.5)	FIG00113730	icw(4);Alkanesulfonate_assimilation icw(4);Alkanesulfonates_Utilization
scaffold1|size1664507	fig|6666666.156949.peg.1805	peg	scaffold1|size1664507_1653605_1652775	1653605	1652775	-	Alkanesulfonates transport system permease protein	FIG00138354	icw(1);Alkanesulfonate_assimilation icw(1);Alkanesulfonates_Utilization
scaffold1|size1664507	fig|6666666.156949.peg.1806	peg	scaffold1|size1664507_1654600_1653602	1654600	1653602	-	Alkanesulfonates-binding protein	FIG00001221	isu;Alkanesulfonate_assimilation isu;Alkanesulfonates_Utilization
scaffold1|size1664507	fig|6666666.156949.peg.1807	peg	scaffold1|size1664507_1655385_1654618	1655385	1654618	-	Alkanesulfonates ABC transporter ATP-binding protein	FIG01304729	icw(3);Alkanesulfonate_assimilation icw(3);Alkanesulfonates_Utilization
scaffold1|size1664507	fig|6666666.156949.peg.1808	peg	scaffold1|size1664507_1655513_1655388	1655513	1655388	-	Alkanesulfonates ABC transporter ATP-binding protein	FIG01304729	icw(3);Alkanesulfonate_assimilation icw(3);Alkanesulfonates_Utilization
scaffold1|size1664507	fig|6666666.156949.peg.1809	peg	scaffold1|size1664507_1655792_1657243	1655792	1657243	+	Catalase (EC 1.11.1.6)	FIG00000313	idu(4);Oxidative_stress idu(4);Protection_from_Reactive_Oxygen_Species
scaffold1|size1664507	fig|6666666.156949.peg.1810	peg	scaffold1|size1664507_1657467_1657270	1657467	1657270	-	transcriptional regulator	FIG00629921	NA
scaffold1|size1664507	fig|6666666.156949.peg.1811	peg	scaffold1|size1664507_1657783_1657950	1657783	1657950	+	FAD-dependent oxidase	FIG01249914	NA
scaffold1|size1664507	fig|6666666.156949.peg.1812	peg	scaffold1|size1664507_1659760_1657988	1659760	1657988	-	Hydroxymethylpyrimidine phosphate synthase ThiC (EC 4.1.99.17)	FIG01958823	NA
scaffold1|size1664507	fig|6666666.156949.peg.1813	peg	scaffold1|size1664507_1660765_1660070	1660765	1660070	-	Peptidase E (EC 3.4.11.2)	FIG01312414	NA
scaffold1|size1664507	fig|6666666.156949.peg.1814	peg	scaffold1|size1664507_1660915_1661076	1660915	1661076	+	FIG01245438: hypothetical protein	FIG01519030	NA
scaffold1|size1664507	fig|6666666.156949.peg.1815	peg	scaffold1|size1664507_1661364_1661161	1661364	1661161	-	FIG01233035: hypothetical protein	FIG01233034	NA
scaffold1|size1664507	fig|6666666.156949.peg.1816	peg	scaffold1|size1664507_1661507_1661391	1661507	1661391	-	hypothetical protein	NA	NA
scaffold1|size1664507	fig|6666666.156949.peg.1817	peg	scaffold1|size1664507_1661506_1662282	1661506	1662282	+	sporulation-control gene	FIG01440239	NA
scaffold1|size1664507	fig|6666666.156949.rna.11	rna	scaffold1|size1664507_1662442_1662361	1662442	1662361	-	tRNA-Leu-CAA	NA	NA
scaffold1|size1664507	fig|6666666.156949.rna.12	rna	scaffold1|size1664507_1662795_1662710	1662795	1662710	-	tRNA-Leu-TAA	NA	NA
scaffold1|size1664507	fig|6666666.156949.rna.13	rna	scaffold1|size1664507_1662873_1662803	1662873	1662803	-	tRNA-Cys-GCA	NA	NA
scaffold1|size1664507	fig|6666666.156949.rna.14	rna	scaffold1|size1664507_1662953_1662882	1662953	1662882	-	tRNA-Gly-GCC	NA	NA
scaffold1|size1664507	fig|6666666.156949.rna.15	rna	scaffold1|size1664507_1663048_1662977	1663048	1662977	-	tRNA-Gly-GCC	NA	NA
scaffold1|size1664507	fig|6666666.156949.rna.16	rna	scaffold1|size1664507_1663169_1663098	1663169	1663098	-	tRNA-Gln-TTG	NA	NA
scaffold1|size1664507	fig|6666666.156949.rna.17	rna	scaffold1|size1664507_1663254_1663182	1663254	1663182	-	tRNA-His-GTG	NA	NA
scaffold1|size1664507	fig|6666666.156949.rna.18	rna	scaffold1|size1664507_1663352_1663282	1663352	1663282	-	tRNA-Trp-CCA	NA	NA
scaffold1|size1664507	fig|6666666.156949.rna.19	rna	scaffold1|size1664507_1663442_1663361	1663442	1663361	-	tRNA-Tyr-GTA	NA	NA
scaffold1|size1664507	fig|6666666.156949.rna.20	rna	scaffold1|size1664507_1663537_1663465	1663537	1663465	-	tRNA-Thr-TGT	NA	NA
scaffold1|size1664507	fig|6666666.156949.rna.21	rna	scaffold1|size1664507_1663618_1663546	1663618	1663546	-	tRNA-Phe-GAA	NA	NA
scaffold1|size1664507	fig|6666666.156949.rna.22	rna	scaffold1|size1664507_1663707_1663634	1663707	1663634	-	tRNA-Asp-GTC	NA	NA
scaffold1|size1664507	fig|6666666.156949.rna.23	rna	scaffold1|size1664507_1663795_1663722	1663795	1663722	-	tRNA-Met-CAT	NA	NA
scaffold1|size1664507	fig|6666666.156949.rna.24	rna	scaffold1|size1664507_1663880_1663808	1663880	1663808	-	tRNA-Val-TAC	NA	NA
scaffold1|size1664507	fig|6666666.156949.rna.25	rna	scaffold1|size1664507_1663961_1663890	1663961	1663890	-	tRNA-Glu-TTC	NA	NA
scaffold1|size1664507	fig|6666666.156949.rna.26	rna	scaffold1|size1664507_1664087_1663999	1664087	1663999	-	tRNA-Pseudo-GGA	NA	NA
scaffold1|size1664507	fig|6666666.156949.rna.27	rna	scaffold1|size1664507_1664167_1664096	1664167	1664096	-	tRNA-Asn-GTT	NA	NA
scaffold1|size1664507	fig|6666666.156949.rna.28	rna	scaffold1|size1664507_1664292_1664177	1664292	1664177	-	5S RNA	NA	NA
scaffold1|size1664507	fig|6666666.156949.rna.29	rna	scaffold1|size1664507_1664507_1664405	1664507	1664405	-	Large Subunit Ribosomal RNA; lsuRNA; LSU rRNA	NA	NA
scaffold206|size638	fig|6666666.156949.peg.1818	peg	scaffold206|size638_193_8	193	8	-	hypothetical protein	NA	NA
scaffold20|size2610	fig|6666666.156949.peg.1819	peg	scaffold20|size2610_526_1365	526	1365	+	hypothetical protein	NA	NA
scaffold20|size2610	fig|6666666.156949.peg.1820	peg	scaffold20|size2610_1389_2237	1389	2237	+	hypothetical protein	NA	NA
scaffold211|size634	fig|6666666.156949.peg.1821	peg	scaffold211|size634_382_522	382	522	+	LSU ribosomal protein L20p	FIG00000216	idu(1);Ribosome_LSU_bacterial idu(1);Mycobacterium_virulence_operon_involved_in_protein_synthesis_(LSU_ribosomal_proteins)
scaffold215|size632	fig|6666666.156949.peg.1822	peg	scaffold215|size632_87_266	87	266	+	hypothetical protein	NA	NA
scaffold216|size632	fig|6666666.156949.peg.1823	peg	scaffold216|size632_593_39	593	39	-	hypothetical protein	NA	NA
scaffold217|size1232	fig|6666666.156949.rna.30	rna	scaffold217|size1232_6_121	6	121	+	5S RNA	NA	NA
scaffold217|size1232	fig|6666666.156949.rna.31	rna	scaffold217|size1232_167_238	167	238	+	tRNA-Asn-GTT	NA	NA
scaffold217|size1232	fig|6666666.156949.rna.32	rna	scaffold217|size1232_244_316	244	316	+	tRNA-Thr-GGT	NA	NA
scaffold217|size1232	fig|6666666.156949.rna.33	rna	scaffold217|size1232_377_448	377	448	+	tRNA-Gly-GCC	NA	NA
scaffold217|size1232	fig|6666666.156949.rna.34	rna	scaffold217|size1232_483_556	483	556	+	tRNA-Arg-ACG	NA	NA
scaffold217|size1232	fig|6666666.156949.rna.35	rna	scaffold217|size1232_603_676	603	676	+	tRNA-Arg-ACG	NA	NA
scaffold217|size1232	fig|6666666.156949.rna.36	rna	scaffold217|size1232_707_780	707	780	+	tRNA-Pro-TGG	NA	NA
scaffold217|size1232	fig|6666666.156949.rna.37	rna	scaffold217|size1232_792_864	792	864	+	tRNA-Ala-TGC	NA	NA
scaffold217|size1232	fig|6666666.156949.rna.38	rna	scaffold217|size1232_1038_1232	1038	1232	+	Small Subunit Ribosomal RNA; ssuRNA; SSU rRNA	NA	NA
scaffold21|size2487	fig|6666666.156949.peg.1824	peg	scaffold21|size2487_1435_1623	1435	1623	+	hypothetical protein	NA	NA
scaffold21|size2487	fig|6666666.156949.peg.1825	peg	scaffold21|size2487_2043_2162	2043	2162	+	hypothetical protein	NA	NA
scaffold21|size2487	fig|6666666.156949.peg.1826	peg	scaffold21|size2487_2484_2200	2484	2200	-	hypothetical protein	NA	NA
scaffold221|size629	fig|6666666.156949.peg.1827	peg	scaffold221|size629_390_190	390	190	-	hypothetical protein	NA	NA
scaffold223|size627	fig|6666666.156949.peg.1828	peg	scaffold223|size627_521_174	521	174	-	probable chemotaxis protein	NA	NA
scaffold225|size625	fig|6666666.156949.peg.1829	peg	scaffold225|size625_496_317	496	317	-	hypothetical protein	NA	NA
scaffold226|size623	fig|6666666.156949.rna.39	rna	scaffold226|size623_268_195	268	195	-	tRNA-Trp-CCA	NA	NA
scaffold226|size623	fig|6666666.156949.rna.40	rna	scaffold226|size623_506_433	506	433	-	tRNA-Pro-TGG	NA	NA
scaffold227|size622	fig|6666666.156949.peg.1830	peg	scaffold227|size622_613_77	613	77	-	Membrane protein	NA	NA
scaffold228|size622	fig|6666666.156949.peg.1831	peg	scaffold228|size622_333_464	333	464	+	LSU ribosomal protein L22p (L17e), chloroplast	FIG01302639	NA
scaffold229|size621	fig|6666666.156949.peg.1832	peg	scaffold229|size621_207_581	207	581	+	FIG00820627: hypothetical protein	FIG00448797	NA
scaffold22|size2356	fig|6666666.156949.peg.1833	peg	scaffold22|size2356_2171_675	2171	675	-	hypothetical protein	NA	NA
scaffold230|size619	fig|6666666.156949.peg.1834	peg	scaffold230|size619_138_263	138	263	+	hypothetical protein	NA	NA
scaffold234|size617	fig|6666666.156949.rna.41	rna	scaffold234|size617_391_462	391	462	+	tRNA-Thr-GGT	NA	NA
scaffold238|size615	fig|6666666.156949.peg.1835	peg	scaffold238|size615_22_531	22	531	+	Cell division transporter, ATP-binding protein FtsE (TC 3.A.5.1.1)	FIG00002914	idu(1);Bacterial_Cell_Division idu(1);CBSS-393121.3.peg.2760
scaffold23|size2316	fig|6666666.156949.peg.1836	peg	scaffold23|size2316_129_893	129	893	+	hypothetical protein	NA	NA
scaffold23|size2316	fig|6666666.156949.peg.1837	peg	scaffold23|size2316_909_2225	909	2225	+	hypothetical protein	NA	NA
scaffold248|size606	fig|6666666.156949.peg.1838	peg	scaffold248|size606_402_557	402	557	+	hypothetical protein	NA	NA
scaffold24|size2290	fig|6666666.156949.peg.1839	peg	scaffold24|size2290_380_775	380	775	+	hypothetical protein	NA	NA
scaffold24|size2290	fig|6666666.156949.peg.1840	peg	scaffold24|size2290_925_1086	925	1086	+	hypothetical protein	NA	NA
scaffold24|size2290	fig|6666666.156949.peg.1841	peg	scaffold24|size2290_1099_2223	1099	2223	+	Phage tail fiber protein	FIG00003520	isu;Phage_tail_fiber_proteins
scaffold252|size603	fig|6666666.156949.peg.1842	peg	scaffold252|size603_130_11	130	11	-	hypothetical protein	NA	NA
scaffold257|size600	fig|6666666.156949.peg.1843	peg	scaffold257|size600_464_240	464	240	-	Acyl-CoA dehydrogenase, short-chain specific (EC 1.3.8.1)	NA	NA
scaffold261|size598	fig|6666666.156949.rna.42	rna	scaffold261|size598_110_30	110	30	-	tRNA-Pseudo-CAA	NA	NA
scaffold26|size2120	fig|6666666.156949.peg.1844	peg	scaffold26|size2120_1797_1651	1797	1651	-	hypothetical protein	NA	NA
scaffold27|size2088	fig|6666666.156949.peg.1845	peg	scaffold27|size2088_2054_63	2054	63	-	hypothetical protein	NA	NA
scaffold280|size591	fig|6666666.156949.peg.1846	peg	scaffold280|size591_106_237	106	237	+	hypothetical protein	NA	NA
scaffold284|size587	fig|6666666.156949.peg.1847	peg	scaffold284|size587_350_505	350	505	+	hypothetical protein	NA	NA
scaffold28|size1893	fig|6666666.156949.rna.43	rna	scaffold28|size1893_1086_1006	1086	1006	-	tRNA-Leu-CAA	NA	NA
scaffold292|size582	fig|6666666.156949.peg.1848	peg	scaffold292|size582_466_320	466	320	-	hypothetical protein	NA	NA
scaffold293|size582	fig|6666666.156949.peg.1849	peg	scaffold293|size582_448_179	448	179	-	Enoyl-CoA hydratase (EC 4.2.1.17)	FIG00033206	idu(3);n-Phenylalkanoic_acid_degradation idu(3);Polyhydroxybutyrate_metabolism idu(3);Isoleucine_degradation idu(3);Fatty_acid_metabolism_cluster idu(3);Butyrate_metabolism_cluster idu(3);Lysine_fermentation idu(3);Butanol_Biosynthesis idu(3);Acetyl-CoA_fermentation_to_Butyrate idu(3);Valine_degradation
scaffold29|size1841	fig|6666666.156949.peg.1850	peg	scaffold29|size1841_114_1220	114	1220	+	hypothetical protein	NA	NA
scaffold2|size1077242	fig|6666666.156949.rna.44	rna	scaffold2|size1077242_78_1	78	1	-	Small Subunit Ribosomal RNA; ssuRNA; SSU rRNA	NA	NA
scaffold2|size1077242	fig|6666666.156949.peg.1851	peg	scaffold2|size1077242_2894_429	2894	429	-	DNA gyrase subunit A (EC 5.99.1.3)	FIG00000080	icw(1);DNA_gyrase_subunits icw(1);Cell_Division_Subsystem_including_YidCD icw(1);DNA_topoisomerases,_Type_II,_ATP-dependent icw(1);DNA_replication_cluster_1 icw(1);Resistance_to_fluoroquinolones
scaffold2|size1077242	fig|6666666.156949.peg.1852	peg	scaffold2|size1077242_2995_3108	2995	3108	+	hypothetical protein	NA	NA
scaffold2|size1077242	fig|6666666.156949.peg.1853	peg	scaffold2|size1077242_5021_3105	5021	3105	-	DNA gyrase subunit B (EC 5.99.1.3)	FIG00028203	isu;DNA_gyrase_subunits isu;Cell_Division_Subsystem_including_YidCD isu;DNA_topoisomerases,_Type_II,_ATP-dependent isu;DNA_replication_cluster_1 isu;Resistance_to_fluoroquinolones
scaffold2|size1077242	fig|6666666.156949.peg.1854	peg	scaffold2|size1077242_5321_5076	5321	5076	-	OrfX	FIG00514959	icw(4);DNA_replication_cluster_1
scaffold2|size1077242	fig|6666666.156949.peg.1855	peg	scaffold2|size1077242_6451_5339	6451	5339	-	DNA recombination and repair protein RecF	FIG00000412	icw(4);Cell_Division_Subsystem_including_YidCD idu(1);DNA_repair,_bacterial_RecFOR_pathway icw(6);DNA_replication_cluster_1 icw(1);Hypothetical_Coupled_to_RecF
scaffold2|size1077242	fig|6666666.156949.peg.1856	peg	scaffold2|size1077242_6682_6467	6682	6467	-	FIG002958: hypothetical protein	FIG00002958	icw(2);DNA_replication_cluster_1 isu;Hypothetical_Coupled_to_RecF
scaffold2|size1077242	fig|6666666.156949.peg.1857	peg	scaffold2|size1077242_7949_6813	7949	6813	-	DNA polymerase III beta subunit (EC 2.7.7.7)	FIG00066425	icw(4);Cell_Division_Subsystem_including_YidCD icw(1);DNA-replication icw(2);DNA_replication_cluster_1
scaffold2|size1077242	fig|6666666.156949.peg.1858	peg	scaffold2|size1077242_9479_8139	9479	8139	-	Chromosomal replication initiator protein DnaA	FIG00000441	icw(2);Cell_Division_Subsystem_including_YidCD isu;DNA-replication icw(4);DNA_replication_cluster_1
scaffold2|size1077242	fig|6666666.156949.peg.1859	peg	scaffold2|size1077242_10392_10742	10392	10742	+	Ribonuclease P protein component (EC 3.1.26.5)	FIG00092649	isu;RNA_modification_cluster isu;Cell_Division_Subsystem_including_YidCD isu;tRNA_processing
scaffold2|size1077242	fig|6666666.156949.peg.1860	peg	scaffold2|size1077242_10890_11672	10890	11672	+	Inner membrane protein translocase component YidC, short form OxaI-like	FIG00130900	icw(2);RNA_modification_cluster icw(7);Cell_Division_Subsystem_including_YidCD icw(1);Mycobacterium_virulence_operon_involved_in_an_unknown_function_with_a_Jag_Protein_and_YidC_and_YidD
scaffold2|size1077242	fig|6666666.156949.peg.1861	peg	scaffold2|size1077242_11669_12295	11669	12295	+	RNA-binding protein Jag	FIG00001656	icw(5);Cell_Division_Subsystem_including_YidCD isu;Mycobacterium_virulence_operon_involved_in_an_unknown_function_with_a_Jag_Protein_and_YidC_and_YidD
scaffold2|size1077242	fig|6666666.156949.peg.1862	peg	scaffold2|size1077242_12606_13985	12606	13985	+	GTPase and tRNA-U34 5-formylation enzyme TrmE	FIG00000279	icw(1);RNA_modification_cluster icw(1);tRNA_modification_Bacteria icw(4);Cell_Division_Subsystem_including_YidCD isu;Universal_GTPases isu;RNA_modification_and_chromosome_partitioning_cluster isu;mnm5U34_biosynthesis_bacteria
scaffold2|size1077242	fig|6666666.156949.peg.1863	peg	scaffold2|size1077242_14006_15892	14006	15892	+	tRNA uridine 5-carboxymethylaminomethyl modification enzyme GidA	FIG00000576	isu;tRNA_modification_Bacteria icw(1);Cell_Division_Subsystem_including_YidCD icw(1);RNA_modification_and_chromosome_partitioning_cluster icw(1);mnm5U34_biosynthesis_bacteria
scaffold2|size1077242	fig|6666666.156949.peg.1864	peg	scaffold2|size1077242_15906_16625	15906	16625	+	rRNA small subunit 7-methylguanosine (m7G) methyltransferase GidB	FIG00000521	isu;RNA_methylation icw(5);Cell_Division_Subsystem_including_YidCD icw(2);RNA_modification_and_chromosome_partitioning_cluster
scaffold2|size1077242	fig|6666666.156949.peg.1865	peg	scaffold2|size1077242_16747_17598	16747	17598	+	Chromosome (plasmid) partitioning protein ParB	FIG00021843	icw(2);Cell_Division_Subsystem_including_YidCD icw(1);Bacterial_Cytoskeleton icw(1);Plasmid_replication icw(4);RNA_modification_and_chromosome_partitioning_cluster
scaffold2|size1077242	fig|6666666.156949.peg.1866	peg	scaffold2|size1077242_18089_17649	18089	17649	-	FIG01227200: hypothetical protein	FIG01227199	NA
scaffold2|size1077242	fig|6666666.156949.peg.1867	peg	scaffold2|size1077242_18337_19098	18337	19098	+	Chromosome (plasmid) partitioning protein ParA	FIG00006461	isu;Bacterial_Cell_Division isu;Ribosome_post-transcriptional_modification_and_chromosomal_segregation_cluster icw(4);Cell_Division_Subsystem_including_YidCD icw(2);Bacterial_Cytoskeleton icw(2);Plasmid_replication icw(4);RNA_modification_and_chromosome_partitioning_cluster
scaffold2|size1077242	fig|6666666.156949.peg.1868	peg	scaffold2|size1077242_19091_19939	19091	19939	+	Chromosome (plasmid) partitioning protein ParB	FIG00021843	icw(2);Cell_Division_Subsystem_including_YidCD icw(1);Bacterial_Cytoskeleton icw(1);Plasmid_replication icw(3);RNA_modification_and_chromosome_partitioning_cluster
scaffold2|size1077242	fig|6666666.156949.peg.1869	peg	scaffold2|size1077242_20595_19978	20595	19978	-	Spore protease GPR related protein	FIG00645492	NA
scaffold2|size1077242	fig|6666666.156949.peg.1870	peg	scaffold2|size1077242_21074_22072	21074	22072	+	FIG01230813: hypothetical protein	FIG01230812	NA
scaffold2|size1077242	fig|6666666.156949.peg.1871	peg	scaffold2|size1077242_22166_22372	22166	22372	+	FIG001891: protein involved in chromosome partitioning	FIG01226301	NA
scaffold2|size1077242	fig|6666666.156949.peg.1872	peg	scaffold2|size1077242_22423_24426	22423	24426	+	Anaerobic dehydrogenases, typically selenocysteine-containing	FIG00041382	idu(1);Anaerobic_respiratory_reductases
scaffold2|size1077242	fig|6666666.156949.peg.1873	peg	scaffold2|size1077242_24553_25653	24553	25653	+	GTP-binding and nucleic acid-binding protein YchF	FIG00049915	isu;Universal_GTPases
scaffold2|size1077242	fig|6666666.156949.peg.1874	peg	scaffold2|size1077242_25764_26051	25764	26051	+	SSU ribosomal protein S6p	FIG00000170	NA
scaffold2|size1077242	fig|6666666.156949.peg.1875	peg	scaffold2|size1077242_26092_26610	26092	26610	+	Single-stranded DNA-binding protein	FIG00077620	idu(2);DNA_repair,_bacterial idu(2);DNA_repair,_bacterial_RecFOR_pathway idu(2);pVir_Plasmid_of_Campylobacter
scaffold2|size1077242	fig|6666666.156949.peg.1876	peg	scaffold2|size1077242_26958_27716	26958	27716	+	Exodeoxyribonuclease III (EC 3.1.11.2)	FIG00000065	icw(1);DNA_repair,_bacterial
scaffold2|size1077242	fig|6666666.156949.peg.1877	peg	scaffold2|size1077242_27775_28710	27775	28710	+	Ribose operon repressor	FIG00024226	idu(1);D-ribose_utilization
scaffold2|size1077242	fig|6666666.156949.peg.1878	peg	scaffold2|size1077242_28766_29146	28766	29146	+	Possible glyoxylase family protein (Lactoylglutathione lyase) (EC 4.4.1.5)	FIG01347028	NA
scaffold2|size1077242	fig|6666666.156949.peg.1879	peg	scaffold2|size1077242_29164_29718	29164	29718	+	Maltose O-acetyltransferase (EC 2.3.1.79)	FIG00001636	isu;Maltose_and_Maltodextrin_Utilization
scaffold2|size1077242	fig|6666666.156949.peg.1880	peg	scaffold2|size1077242_31107_29752	31107	29752	-	Niacin transporter NiaP	FIG00009989	idu(1);NAD_and_NADP_cofactor_biosynthesis_global idu(1);Niacin-Choline_transport_and_metabolism
scaffold2|size1077242	fig|6666666.156949.peg.1881	peg	scaffold2|size1077242_31334_32233	31334	32233	+	FIG01227687: hypothetical protein	FIG01227686	NA
scaffold2|size1077242	fig|6666666.156949.peg.1882	peg	scaffold2|size1077242_34299_32230	34299	32230	-	Thymidylate kinase (EC 2.7.4.9)	FIG00000175	idu(1);pyrimidine_conversions idu(1);CBSS-393133.3.peg.2787
scaffold2|size1077242	fig|6666666.156949.peg.1883	peg	scaffold2|size1077242_35288_34371	35288	34371	-	Permease of the drug/metabolite transporter (DMT) superfamily	FIG00846773	idu(11);Queuosine-Archaeosine_Biosynthesis
scaffold2|size1077242	fig|6666666.156949.peg.1884	peg	scaffold2|size1077242_35521_35285	35521	35285	-	Uncharacterized HTH-type transcriptional regulator yyaN	FIG01230249	NA
scaffold2|size1077242	fig|6666666.156949.peg.1885	peg	scaffold2|size1077242_36041_36241	36041	36241	+	Streptothricin acetyltransferase, Streptomyces lavendulae type	FIG00003590	icw(1);Streptothricin_resistance
scaffold2|size1077242	fig|6666666.156949.peg.1886	peg	scaffold2|size1077242_36534_36349	36534	36349	-	hypothetical protein	NA	NA
scaffold2|size1077242	fig|6666666.156949.peg.1887	peg	scaffold2|size1077242_37342_36776	37342	36776	-	Dihydrofolate reductase (EC 1.5.1.3)	FIG00000048	idu(2);5-FCL-like_protein idu(2);Folate_Biosynthesis
scaffold2|size1077242	fig|6666666.156949.peg.1888	peg	scaffold2|size1077242_37858_37502	37858	37502	-	conserved protein YyaQ	FIG01450058	NA
scaffold2|size1077242	fig|6666666.156949.peg.1889	peg	scaffold2|size1077242_38256_38777	38256	38777	+	Streptothricin acetyltransferase, Streptomyces lavendulae type	FIG00003590	icw(1);Streptothricin_resistance
scaffold2|size1077242	fig|6666666.156949.peg.1890	peg	scaffold2|size1077242_39447_38845	39447	38845	-	membrane protein, putative	FIG00439698	NA
scaffold2|size1077242	fig|6666666.156949.peg.1891	peg	scaffold2|size1077242_39890_39444	39890	39444	-	GNAT family acetyltransferase YjcF	FIG00003802	NA
scaffold2|size1077242	fig|6666666.156949.peg.1892	peg	scaffold2|size1077242_40010_40462	40010	40462	+	Transcriptional regulator, MarR family	FIG00554610	NA
scaffold2|size1077242	fig|6666666.156949.peg.1893	peg	scaffold2|size1077242_40581_41243	40581	41243	+	putative metal-dependent hydrolase	FIG01442968	NA
scaffold2|size1077242	fig|6666666.156949.peg.1894	peg	scaffold2|size1077242_41279_41428	41279	41428	+	hypothetical protein	NA	NA
scaffold2|size1077242	fig|6666666.156949.peg.1895	peg	scaffold2|size1077242_41450_41860	41450	41860	+	Ketosteroid isomerase homolog	FIG01316545	NA
scaffold2|size1077242	fig|6666666.156949.peg.1896	peg	scaffold2|size1077242_41928_42716	41928	42716	+	FIG01244235: hypothetical protein	FIG01244230	NA
scaffold2|size1077242	fig|6666666.156949.peg.1897	peg	scaffold2|size1077242_43491_42754	43491	42754	-	transcriptional regulator (MerR family)	FIG01309711	NA
scaffold2|size1077242	fig|6666666.156949.peg.1898	peg	scaffold2|size1077242_44961_43651	44961	43651	-	FIG01233340: hypothetical protein	FIG01456176	NA
scaffold2|size1077242	fig|6666666.156949.peg.1899	peg	scaffold2|size1077242_45204_45383	45204	45383	+	FIG01243582: hypothetical protein	FIG01243581	NA
scaffold2|size1077242	fig|6666666.156949.peg.1900	peg	scaffold2|size1077242_45395_45841	45395	45841	+	YybP	FIG01242854	NA
scaffold2|size1077242	fig|6666666.156949.peg.1901	peg	scaffold2|size1077242_46803_45874	46803	45874	-	Manganese-dependent inorganic pyrophosphatase (EC 3.6.1.1)	FIG00001231	isu;Phosphate_metabolism
scaffold2|size1077242	fig|6666666.156949.peg.1902	peg	scaffold2|size1077242_47008_47385	47008	47385	+	Transcriptional regulator, MarR family; Cinnamoyl ester hydrolase	FIG01372763	NA
scaffold2|size1077242	fig|6666666.156949.peg.1903	peg	scaffold2|size1077242_47897_47415	47897	47415	-	Spore coat protein F	FIG00014890	NA
scaffold2|size1077242	fig|6666666.156949.peg.1904	peg	scaffold2|size1077242_48043_48192	48043	48192	+	hypothetical protein	NA	NA
scaffold2|size1077242	fig|6666666.156949.peg.1905	peg	scaffold2|size1077242_48419_49348	48419	49348	+	FIG003573: hypothetical protein	FIG00003573	NA
scaffold2|size1077242	fig|6666666.156949.peg.1906	peg	scaffold2|size1077242_49385_51364	49385	51364	+	Phosphoesterase, DHH family protein	FIG00011537	NA
scaffold2|size1077242	fig|6666666.156949.peg.1907	peg	scaffold2|size1077242_51361_51810	51361	51810	+	LSU ribosomal protein L9p	FIG00000205	isu;Ribosome_LSU_bacterial
scaffold2|size1077242	fig|6666666.156949.peg.1908	peg	scaffold2|size1077242_53898_51847	53898	51847	-	FIG01240016: hypothetical protein	FIG01386762	NA
scaffold2|size1077242	fig|6666666.156949.peg.1909	peg	scaffold2|size1077242_55211_54003	55211	54003	-	Cyanate MFS transporter	FIG01379741	NA
scaffold2|size1077242	fig|6666666.156949.peg.1910	peg	scaffold2|size1077242_55424_55284	55424	55284	-	hypothetical protein	NA	NA
scaffold2|size1077242	fig|6666666.156949.peg.1911	peg	scaffold2|size1077242_55545_55748	55545	55748	+	FIG01235398: hypothetical protein	FIG01235394	NA
scaffold2|size1077242	fig|6666666.156949.peg.1912	peg	scaffold2|size1077242_55996_55796	55996	55796	-	CDS_ID OB2585	NA	NA
scaffold2|size1077242	fig|6666666.156949.peg.1913	peg	scaffold2|size1077242_56166_57530	56166	57530	+	Replicative DNA helicase (DnaB) (EC 3.6.4.12)	NA	isu;DNA-replication
scaffold2|size1077242	fig|6666666.156949.peg.1914	peg	scaffold2|size1077242_57569_58069	57569	58069	+	YycE	FIG01231972	NA
scaffold2|size1077242	fig|6666666.156949.peg.1915	peg	scaffold2|size1077242_58275_59567	58275	59567	+	Adenylosuccinate synthetase (EC 6.3.4.4)	FIG00000107	isu;Purine_conversions
scaffold2|size1077242	fig|6666666.156949.rna.45	rna	scaffold2|size1077242_59792_59864	59792	59864	+	tRNA-Lys-TTT	NA	NA
scaffold2|size1077242	fig|6666666.156949.rna.46	rna	scaffold2|size1077242_59877_59948	59877	59948	+	tRNA-Glu-TTC	NA	NA
scaffold2|size1077242	fig|6666666.156949.rna.47	rna	scaffold2|size1077242_60030_60103	60030	60103	+	tRNA-Asp-GTC	NA	NA
scaffold2|size1077242	fig|6666666.156949.rna.48	rna	scaffold2|size1077242_60142_60214	60142	60214	+	tRNA-Phe-GAA	NA	NA
scaffold2|size1077242	fig|6666666.156949.peg.1916	peg	scaffold2|size1077242_60595_61305	60595	61305	+	Two-component response regulator SA14-24	FIG00001637	icw(1);Heme,_hemin_uptake_and_utilization_systems_in_GramPositives
scaffold2|size1077242	fig|6666666.156949.peg.1917	peg	scaffold2|size1077242_61313_63148	61313	63148	+	Two-component sensor kinase SA14-24	FIG00122441	isu;Heme,_hemin_uptake_and_utilization_systems_in_GramPositives
scaffold2|size1077242	fig|6666666.156949.peg.1918	peg	scaffold2|size1077242_63138_64505	63138	64505	+	FIG011501: YycH protein	FIG00011501	NA
scaffold2|size1077242	fig|6666666.156949.peg.1919	peg	scaffold2|size1077242_64492_65331,scaffold2|size1077242_65335_65340	64492	65340	+	hypothetical protein SA_21	FIG00003193	NA
scaffold2|size1077242	fig|6666666.156949.peg.1920	peg	scaffold2|size1077242_65356_66150	65356	66150	+	Zn-dependent hydrolase (beta-lactamase superfamily)	FIG00052300	NA
scaffold2|size1077242	fig|6666666.156949.peg.1921	peg	scaffold2|size1077242_66232_67434	66232	67434	+	Serine protease, DegP/HtrA, do-like (EC 3.4.21.-)	FIG00083017	NA
scaffold2|size1077242	fig|6666666.156949.peg.1922	peg	scaffold2|size1077242_67454_67582	67454	67582	+	hypothetical protein	NA	NA
scaffold2|size1077242	fig|6666666.156949.peg.1923	peg	scaffold2|size1077242_69126_67741	69126	67741	-	Arginine utilization regulatory protein RocR	FIG00014742	icw(2);Arginine_and_Ornithine_Degradation
scaffold2|size1077242	fig|6666666.156949.peg.1924	peg	scaffold2|size1077242_69204_69332	69204	69332	+	hypothetical protein	NA	NA
scaffold2|size1077242	fig|6666666.156949.peg.1925	peg	scaffold2|size1077242_69334_70572	69334	70572	+	Ornithine aminotransferase (EC 2.6.1.13)	FIG00035201	icw(1);Arginine_and_Ornithine_Degradation isu;Dimethylarginine_metabolism
scaffold2|size1077242	fig|6666666.156949.peg.1926	peg	scaffold2|size1077242_70795_72198	70795	72198	+	Arginine permease RocE	FIG00011632	icw(3);Arginine_and_Ornithine_Degradation
scaffold2|size1077242	fig|6666666.156949.peg.1927	peg	scaffold2|size1077242_72271_73161	72271	73161	+	Arginase (EC 3.5.3.1)	FIG00003810	isu;Arginine_and_Ornithine_Degradation
scaffold2|size1077242	fig|6666666.156949.peg.1928	peg	scaffold2|size1077242_73312_73196	73312	73196	-	regulator of the activity of phosphatase RapG	NA	NA
scaffold2|size1077242	fig|6666666.156949.peg.1929	peg	scaffold2|size1077242_74410_73313	74410	73313	-	response regulator aspartate phosphatase	FIG01228496	NA
scaffold2|size1077242	fig|6666666.156949.peg.1930	peg	scaffold2|size1077242_74521_74991	74521	74991	+	acetyltransferase, GNAT family	FIG01315364	NA
scaffold2|size1077242	fig|6666666.156949.peg.1931	peg	scaffold2|size1077242_75133_75870	75133	75870	+	unknown	NA	NA
scaffold2|size1077242	fig|6666666.156949.peg.1932	peg	scaffold2|size1077242_75881_77044	75881	77044	+	FIG01242922: hypothetical protein	FIG01242921	NA
scaffold2|size1077242	fig|6666666.156949.peg.1933	peg	scaffold2|size1077242_77060_77308	77060	77308	+	unknown	NA	NA
scaffold2|size1077242	fig|6666666.156949.peg.1934	peg	scaffold2|size1077242_77412_77582	77412	77582	+	FIG01234379: hypothetical protein	FIG01234378	NA
scaffold2|size1077242	fig|6666666.156949.peg.1935	peg	scaffold2|size1077242_77645_78871	77645	78871	+	Threonine dehydrogenase and related Zn-dependent dehydrogenases	FIG00053044	isu;Threonine_degradation
scaffold2|size1077242	fig|6666666.156949.peg.1936	peg	scaffold2|size1077242_79318_78905	79318	78905	-	FIG01232189: hypothetical protein	FIG01339589	NA
scaffold2|size1077242	fig|6666666.156949.peg.1937	peg	scaffold2|size1077242_79754_80233	79754	80233	+	LSU m3Psi1915 methyltransferase RlmH	FIG01280345	isu;tRNA_modification_Bacteria isu;RNA_methylation isu;Ribosome_biogenesis_bacterial
scaffold2|size1077242	fig|6666666.156949.peg.1938	peg	scaffold2|size1077242_80371_83937	80371	83937	+	USG protein	NA	NA
scaffold2|size1077242	fig|6666666.156949.peg.1939	peg	scaffold2|size1077242_84092_86116	84092	86116	+	hypothetical protein	NA	NA
scaffold2|size1077242	fig|6666666.156949.peg.1940	peg	scaffold2|size1077242_88648_86723	88648	86723	-	Fructose-1,6-bisphosphatase, Bacillus type (EC 3.1.3.11)	FIG00008941	isu;Calvin-Benson_cycle isu;Glycolysis_and_Gluconeogenesis
scaffold2|size1077242	fig|6666666.156949.peg.1941	peg	scaffold2|size1077242_89120_89269	89120	89269	+	YydF protein	NA	NA
scaffold2|size1077242	fig|6666666.156949.peg.1942	peg	scaffold2|size1077242_89423_90286	89423	90286	+	FIG00633815: hypothetical protein	FIG00633811	NA
scaffold2|size1077242	fig|6666666.156949.peg.1943	peg	scaffold2|size1077242_90267_91025	90267	91025	+	Membrane-embedded metalloprotease YydH	FIG00629725	NA
scaffold2|size1077242	fig|6666666.156949.peg.1944	peg	scaffold2|size1077242_91175_91804	91175	91804	+	ABC transporter ATP-binding protein YydI	FIG01114354	NA
scaffold2|size1077242	fig|6666666.156949.peg.1945	peg	scaffold2|size1077242_91825_92547	91825	92547	+	ABC-2 family transporter protein YydJ	FIG00628856	NA
scaffold2|size1077242	fig|6666666.156949.peg.1946	peg	scaffold2|size1077242_92836_92675	92836	92675	-	hypothetical protein	NA	NA
scaffold2|size1077242	fig|6666666.156949.peg.1947	peg	scaffold2|size1077242_93574_92864	93574	92864	-	Transcriptional regulator, GntR family	FIG00621925	NA
scaffold2|size1077242	fig|6666666.156949.peg.1948	peg	scaffold2|size1077242_93951_94127	93951	94127	+	PTS system, glucose-specific IIBC component (EC 2.7.1.69)	FIG00434424	NA
scaffold2|size1077242	fig|6666666.156949.peg.1949	peg	scaffold2|size1077242_94141_95580	94141	95580	+	6-phospho-beta-glucosidase (EC 3.2.1.86)	FIG00001882	idu(3);Beta-Glucoside_Metabolism
scaffold2|size1077242	fig|6666666.156949.peg.1950	peg	scaffold2|size1077242_95868_97220	95868	97220	+	FIG00645980: hypothetical protein	FIG01598167	NA
scaffold2|size1077242	fig|6666666.156949.peg.1951	peg	scaffold2|size1077242_98861_97332	98861	97332	-	Alkyl hydroperoxide reductase protein F (EC 1.6.4.-)	FIG00001029	isu;Thioredoxin-disulfide_reductase
[truncated: 2,489 more rows]
