# Supplementary material for: Genome analysis of biosurfactant producing bacterium, Bacillus tequilensis
Source: PLoS One. 2023 Jun 2;18(6):e0285994. doi: 10.1371/journal.pone.0285994 (PMC10237388; doi:10.1371/journal.pone.0285994)
Supplement: S2 Table — (XLSX) [file pone.0285994.s002.xlsx]

## Sheet: Sheet1
Category	Subcategory	Subsystem	Role	Features
Cofactors, Vitamins, Prosthetic Groups, Pigments	Biotin	Biotin biosynthesis	Pimeloyl-CoA synthase (EC 6.2.1.14)	fig|227866.17.peg.3759
Cofactors, Vitamins, Prosthetic Groups, Pigments	Biotin	Biotin biosynthesis	Substrate-specific component BioY of biotin ECF transporter	fig|227866.17.peg.1653, fig|227866.17.peg.2841
Cofactors, Vitamins, Prosthetic Groups, Pigments	Biotin	Biotin biosynthesis	Biotin operon repressor	fig|227866.17.peg.428
Cofactors, Vitamins, Prosthetic Groups, Pigments	Biotin	Biotin biosynthesis	Adenosylmethionine-8-amino-7-oxononanoate aminotransferase (EC 2.6.1.62)	fig|227866.17.peg.516, fig|227866.17.peg.1768, fig|227866.17.peg.3758
Cofactors, Vitamins, Prosthetic Groups, Pigments	Biotin	Biotin biosynthesis	8-amino-7-oxononanoate synthase (EC 2.3.1.47)	fig|227866.17.peg.3757
Cofactors, Vitamins, Prosthetic Groups, Pigments	Biotin	Biotin biosynthesis	Dethiobiotin synthetase (EC 6.3.3.3)	fig|227866.17.peg.3756
Cofactors, Vitamins, Prosthetic Groups, Pigments	Biotin	Biotin biosynthesis	Biotin synthase (EC 2.8.1.6)	fig|227866.17.peg.3755
Cofactors, Vitamins, Prosthetic Groups, Pigments	Biotin	Biotin biosynthesis	Long-chain-fatty-acid--CoA ligase (EC 6.2.1.3)	fig|227866.17.peg.680, fig|227866.17.peg.3151, fig|227866.17.peg.3594
Cofactors, Vitamins, Prosthetic Groups, Pigments	Biotin	Biotin biosynthesis	3-ketoacyl-CoA thiolase (EC 2.3.1.16)	fig|227866.17.peg.1655, fig|227866.17.peg.2754
Cofactors, Vitamins, Prosthetic Groups, Pigments	Biotin	Biotin biosynthesis	predicted biotin regulatory protein BioR (GntR family)	fig|227866.17.peg.3007
Cofactors, Vitamins, Prosthetic Groups, Pigments	Biotin	Biotin biosynthesis Experimental	Dethiobiotin synthetase (EC 6.3.3.3)	fig|227866.17.peg.3756
Cofactors, Vitamins, Prosthetic Groups, Pigments	Biotin	Biotin biosynthesis Experimental	Biotin synthase (EC 2.8.1.6)	fig|227866.17.peg.3755
Cofactors, Vitamins, Prosthetic Groups, Pigments	Biotin	Biotin biosynthesis Experimental	Adenosylmethionine-8-amino-7-oxononanoate aminotransferase (EC 2.6.1.62)	fig|227866.17.peg.516, fig|227866.17.peg.1768, fig|227866.17.peg.3758
Cofactors, Vitamins, Prosthetic Groups, Pigments	Biotin	Biotin biosynthesis Experimental	8-amino-7-oxononanoate synthase (EC 2.3.1.47)	fig|227866.17.peg.3757
Cofactors, Vitamins, Prosthetic Groups, Pigments	Cofactors, Vitamins, Prosthetic Groups, Pigments - no subcategory	Thiamin biosynthesis	Phosphomethylpyrimidine kinase (EC 2.7.4.7)	fig|227866.17.peg.1509
Cofactors, Vitamins, Prosthetic Groups, Pigments	Cofactors, Vitamins, Prosthetic Groups, Pigments - no subcategory	Thiamin biosynthesis	Hydroxymethylpyrimidine ABC transporter, ATPase component	fig|227866.17.peg.3798
Cofactors, Vitamins, Prosthetic Groups, Pigments	Cofactors, Vitamins, Prosthetic Groups, Pigments - no subcategory	Thiamin biosynthesis	Substrate-specific component ThiT of thiamin ECF transporter	fig|227866.17.peg.2954
Cofactors, Vitamins, Prosthetic Groups, Pigments	Cofactors, Vitamins, Prosthetic Groups, Pigments - no subcategory	Thiamin biosynthesis	Thiaminase II (EC 3.5.99.2)	fig|227866.17.peg.1515
Cofactors, Vitamins, Prosthetic Groups, Pigments	Cofactors, Vitamins, Prosthetic Groups, Pigments - no subcategory	Thiamin biosynthesis	Hydroxyethylthiazole kinase (EC 2.7.1.50)	fig|227866.17.peg.2159
Cofactors, Vitamins, Prosthetic Groups, Pigments	Cofactors, Vitamins, Prosthetic Groups, Pigments - no subcategory	Thiamin biosynthesis	Additional substrate-binding component of thiamin-regulated ECF transporter for HydroxyMethylPyrimidine	fig|227866.17.peg.1221
Cofactors, Vitamins, Prosthetic Groups, Pigments	Cofactors, Vitamins, Prosthetic Groups, Pigments - no subcategory	Thiamin biosynthesis	Sulfur carrier protein adenylyltransferase ThiF	fig|227866.17.peg.1510
Cofactors, Vitamins, Prosthetic Groups, Pigments	Cofactors, Vitamins, Prosthetic Groups, Pigments - no subcategory	Thiamin biosynthesis	tRNA S(4)U 4-thiouridine synthase (former ThiI)	fig|227866.17.peg.3692
Cofactors, Vitamins, Prosthetic Groups, Pigments	Cofactors, Vitamins, Prosthetic Groups, Pigments - no subcategory	Thiamin biosynthesis	Glycine oxidase ThiO (EC 1.4.3.19)	fig|227866.17.peg.1513
Cofactors, Vitamins, Prosthetic Groups, Pigments	Cofactors, Vitamins, Prosthetic Groups, Pigments - no subcategory	Thiamin biosynthesis	Thiamin pyrophosphokinase (EC 2.7.6.2)	fig|227866.17.peg.942
Cofactors, Vitamins, Prosthetic Groups, Pigments	Cofactors, Vitamins, Prosthetic Groups, Pigments - no subcategory	Thiamin biosynthesis	Thiazole biosynthesis protein ThiG	fig|227866.17.peg.1511
Cofactors, Vitamins, Prosthetic Groups, Pigments	Cofactors, Vitamins, Prosthetic Groups, Pigments - no subcategory	Thiamin biosynthesis	Transmembrane component YkoC of energizing module of thiamin-regulated ECF transporter for HydroxyMethylPyrimidine	fig|227866.17.peg.1224
Cofactors, Vitamins, Prosthetic Groups, Pigments	Cofactors, Vitamins, Prosthetic Groups, Pigments - no subcategory	Thiamin biosynthesis	Thiamine-monophosphate kinase (EC 2.7.4.16)	fig|227866.17.peg.3851
Cofactors, Vitamins, Prosthetic Groups, Pigments	Cofactors, Vitamins, Prosthetic Groups, Pigments - no subcategory	Thiamin biosynthesis	1-deoxy-D-xylulose 5-phosphate synthase (EC 2.2.1.7)	fig|227866.17.peg.233
Cofactors, Vitamins, Prosthetic Groups, Pigments	Cofactors, Vitamins, Prosthetic Groups, Pigments - no subcategory	Thiamin biosynthesis	Substrate-specific component YkoE of thiamin-regulated ECF transporter for HydroxyMethylPyrimidine	fig|227866.17.peg.1222
Cofactors, Vitamins, Prosthetic Groups, Pigments	Cofactors, Vitamins, Prosthetic Groups, Pigments - no subcategory	Thiamin biosynthesis	Hydroxymethylpyrimidine ABC transporter, transmembrane component	fig|227866.17.peg.3799
Cofactors, Vitamins, Prosthetic Groups, Pigments	Cofactors, Vitamins, Prosthetic Groups, Pigments - no subcategory	Thiamin biosynthesis	Thiamin-phosphate pyrophosphorylase (EC 2.5.1.3)	fig|227866.17.peg.1514, fig|227866.17.peg.2160
Cofactors, Vitamins, Prosthetic Groups, Pigments	Cofactors, Vitamins, Prosthetic Groups, Pigments - no subcategory	Thiamin biosynthesis	Sulfur carrier protein ThiS	fig|227866.17.peg.1512
Cofactors, Vitamins, Prosthetic Groups, Pigments	Quinone cofactors	Menaquinone and Phylloquinone Biosynthesis	Naphthoate synthase (EC 4.1.3.36)	fig|227866.17.peg.3818
Cofactors, Vitamins, Prosthetic Groups, Pigments	Quinone cofactors	Menaquinone and Phylloquinone Biosynthesis	Menaquinone-specific isochorismate synthase (EC 5.4.4.2)	fig|227866.17.peg.3821
Cofactors, Vitamins, Prosthetic Groups, Pigments	Quinone cofactors	Menaquinone and Phylloquinone Biosynthesis	2-succinyl-6-hydroxy-2,4-cyclohexadiene-1-carboxylate synthase (EC 4.2.99.20)	fig|227866.17.peg.3819
Cofactors, Vitamins, Prosthetic Groups, Pigments	Quinone cofactors	Menaquinone and Phylloquinone Biosynthesis	2-succinyl-5-enolpyruvyl-6-hydroxy-3-cyclohexene-1-carboxylic-acid synthase (EC 2.2.1.9)	fig|227866.17.peg.3820
Cofactors, Vitamins, Prosthetic Groups, Pigments	Quinone cofactors	Menaquinone and Phylloquinone Biosynthesis	O-succinylbenzoic acid--CoA ligase (EC 6.2.1.26)	fig|227866.17.peg.1654, fig|227866.17.peg.1665, fig|227866.17.peg.3817
Cofactors, Vitamins, Prosthetic Groups, Pigments	Quinone cofactors	Menaquinone and Phylloquinone Biosynthesis	O-succinylbenzoate synthase (EC 4.2.1.113)	fig|227866.17.peg.3816
Cofactors, Vitamins, Prosthetic Groups, Pigments	Quinone cofactors	Menaquinone and Phylloquinone Biosynthesis	1,4-dihydroxy-2-naphthoate polyprenyltransferase (EC 2.5.1.74)	fig|227866.17.peg.2136
Cofactors, Vitamins, Prosthetic Groups, Pigments	Quinone cofactors	Menaquinone and Phylloquinone Biosynthesis -- gjo	Naphthoate synthase (EC 4.1.3.36)	fig|227866.17.peg.3818
Cofactors, Vitamins, Prosthetic Groups, Pigments	Quinone cofactors	Menaquinone and Phylloquinone Biosynthesis -- gjo	Menaquinone-specific isochorismate synthase (EC 5.4.4.2)	fig|227866.17.peg.3821
Cofactors, Vitamins, Prosthetic Groups, Pigments	Quinone cofactors	Menaquinone and Phylloquinone Biosynthesis -- gjo	2-succinyl-6-hydroxy-2,4-cyclohexadiene-1-carboxylate synthase (EC 4.2.99.20)	fig|227866.17.peg.3819
Cofactors, Vitamins, Prosthetic Groups, Pigments	Quinone cofactors	Menaquinone and Phylloquinone Biosynthesis -- gjo	2-succinyl-5-enolpyruvyl-6-hydroxy-3-cyclohexene-1-carboxylic-acid synthase (EC 2.2.1.9)	fig|227866.17.peg.3820
Cofactors, Vitamins, Prosthetic Groups, Pigments	Quinone cofactors	Menaquinone and Phylloquinone Biosynthesis -- gjo	O-succinylbenzoic acid--CoA ligase (EC 6.2.1.26)	fig|227866.17.peg.1654, fig|227866.17.peg.1665, fig|227866.17.peg.3817
Cofactors, Vitamins, Prosthetic Groups, Pigments	Quinone cofactors	Menaquinone and Phylloquinone Biosynthesis -- gjo	O-succinylbenzoate synthase (EC 4.2.1.113)	fig|227866.17.peg.3816
Cofactors, Vitamins, Prosthetic Groups, Pigments	Quinone cofactors	Menaquinone and Phylloquinone Biosynthesis -- gjo	1,4-dihydroxy-2-naphthoate polyprenyltransferase (EC 2.5.1.74)	fig|227866.17.peg.2136
Cofactors, Vitamins, Prosthetic Groups, Pigments	Tetrapyrroles	Heme and Siroheme Biosynthesis	Hypothetical radical SAM family enzyme in heat shock gene cluster, similarity with CPO of BS HemN-type	fig|227866.17.peg.104
Cofactors, Vitamins, Prosthetic Groups, Pigments	Tetrapyrroles	Heme and Siroheme Biosynthesis	Glutamyl-tRNA synthetase (EC 6.1.1.17)	fig|227866.17.peg.4248
Cofactors, Vitamins, Prosthetic Groups, Pigments	Tetrapyrroles	Heme and Siroheme Biosynthesis	Uroporphyrinogen-III synthase (EC 4.2.1.75)	fig|227866.17.peg.1337, fig|227866.17.peg.3251, fig|227866.17.peg.3546
Cofactors, Vitamins, Prosthetic Groups, Pigments	Tetrapyrroles	Heme and Siroheme Biosynthesis	Glutamate-1-semialdehyde aminotransferase (EC 5.4.3.8)	fig|227866.17.peg.3544, fig|227866.17.peg.4130
Cofactors, Vitamins, Prosthetic Groups, Pigments	Tetrapyrroles	Heme and Siroheme Biosynthesis	Precorrin-2 oxidase (EC 1.3.1.76)	fig|227866.17.peg.959
Cofactors, Vitamins, Prosthetic Groups, Pigments	Tetrapyrroles	Heme and Siroheme Biosynthesis	Hemoprotein HemQ, essential component of heme biosynthetic pathway in Gram-positive bacteria	fig|227866.17.peg.2228
Cofactors, Vitamins, Prosthetic Groups, Pigments	Tetrapyrroles	Heme and Siroheme Biosynthesis	Porphobilinogen deaminase (EC 2.5.1.61)	fig|227866.17.peg.3547
Cofactors, Vitamins, Prosthetic Groups, Pigments	Tetrapyrroles	Heme and Siroheme Biosynthesis	HemX protein, negative effector of steady-state concentration of glutamyl-tRNA reductase	fig|227866.17.peg.3548
Cofactors, Vitamins, Prosthetic Groups, Pigments	Tetrapyrroles	Heme and Siroheme Biosynthesis	Uroporphyrinogen-III methyltransferase (EC 2.1.1.107)	fig|227866.17.peg.961, fig|227866.17.peg.3251
Cofactors, Vitamins, Prosthetic Groups, Pigments	Tetrapyrroles	Heme and Siroheme Biosynthesis	Porphobilinogen synthase (EC 4.2.1.24)	fig|227866.17.peg.3545
Cofactors, Vitamins, Prosthetic Groups, Pigments	Tetrapyrroles	Heme and Siroheme Biosynthesis	Coproporphyrinogen III oxidase, oxygen-independent (EC 1.3.99.22)	fig|227866.17.peg.1711
Cofactors, Vitamins, Prosthetic Groups, Pigments	Tetrapyrroles	Heme and Siroheme Biosynthesis	Glutamyl-tRNA reductase (EC 1.2.1.70)	fig|227866.17.peg.3549
Cofactors, Vitamins, Prosthetic Groups, Pigments	Tetrapyrroles	Heme and Siroheme Biosynthesis	Ferrochelatase, protoheme ferro-lyase (EC 4.99.1.1)	fig|227866.17.peg.1679
Cofactors, Vitamins, Prosthetic Groups, Pigments	Tetrapyrroles	Heme and Siroheme Biosynthesis	Protoporphyrinogen IX oxidase, aerobic, HemY (EC 1.3.3.4)	fig|227866.17.peg.1678
Cofactors, Vitamins, Prosthetic Groups, Pigments	Tetrapyrroles	Heme and Siroheme Biosynthesis	Uroporphyrinogen III decarboxylase (EC 4.1.1.37)	fig|227866.17.peg.1680
Cofactors, Vitamins, Prosthetic Groups, Pigments	Tetrapyrroles	Heme and Siroheme Biosynthesis	Sirohydrochlorin ferrochelatase (EC 4.99.1.4)	fig|227866.17.peg.960
Cofactors, Vitamins, Prosthetic Groups, Pigments	Riboflavin, FMN, FAD	riboflavin to FAD	FMN adenylyltransferase (EC 2.7.7.2)	fig|227866.17.peg.855
Cofactors, Vitamins, Prosthetic Groups, Pigments	Riboflavin, FMN, FAD	riboflavin to FAD	Riboflavin synthase eubacterial/eukaryotic (EC 2.5.1.9)	fig|227866.17.peg.341
Cofactors, Vitamins, Prosthetic Groups, Pigments	Riboflavin, FMN, FAD	riboflavin to FAD	Riboflavin kinase (EC 2.7.1.26)	fig|227866.17.peg.855
Cofactors, Vitamins, Prosthetic Groups, Pigments	Riboflavin, FMN, FAD	riboflavin to FAD	3,4-dihydroxy-2-butanone 4-phosphate synthase (EC 4.1.99.12)	fig|227866.17.peg.342
Cofactors, Vitamins, Prosthetic Groups, Pigments	Riboflavin, FMN, FAD	Flavodoxin	Flavodoxin	fig|227866.17.peg.1116, fig|227866.17.peg.1118
Cofactors, Vitamins, Prosthetic Groups, Pigments	Riboflavin, FMN, FAD	Flavodoxin	NAD(P)H oxidoreductase YRKL (EC 1.6.99.-)	fig|227866.17.peg.2408
Cofactors, Vitamins, Prosthetic Groups, Pigments	Riboflavin, FMN, FAD	Flavodoxin	Flavodoxin 2	fig|227866.17.peg.2408
Cofactors, Vitamins, Prosthetic Groups, Pigments	Riboflavin, FMN, FAD	Riboflavin, FMN and FAD metabolism	FMN adenylyltransferase (EC 2.7.7.2)	fig|227866.17.peg.855
Cofactors, Vitamins, Prosthetic Groups, Pigments	Riboflavin, FMN, FAD	Riboflavin, FMN and FAD metabolism	Substrate-specific component RibU of riboflavin ECF transporter	fig|227866.17.peg.363
Cofactors, Vitamins, Prosthetic Groups, Pigments	Riboflavin, FMN, FAD	Riboflavin, FMN and FAD metabolism	6,7-dimethyl-8-ribityllumazine synthase (EC 2.5.1.78)	fig|227866.17.peg.343
Cofactors, Vitamins, Prosthetic Groups, Pigments	Riboflavin, FMN, FAD	Riboflavin, FMN and FAD metabolism	5-Amino-6-(5'-phosphoribitylamino)uracil phosphatase	fig|227866.17.peg.3634
Cofactors, Vitamins, Prosthetic Groups, Pigments	Riboflavin, FMN, FAD	Riboflavin, FMN and FAD metabolism	5-amino-6-(5-phosphoribosylamino)uracil reductase (EC 1.1.1.193)	fig|227866.17.peg.340
Cofactors, Vitamins, Prosthetic Groups, Pigments	Riboflavin, FMN, FAD	Riboflavin, FMN and FAD metabolism	Riboflavin kinase (EC 2.7.1.26)	fig|227866.17.peg.855
Cofactors, Vitamins, Prosthetic Groups, Pigments	Riboflavin, FMN, FAD	Riboflavin, FMN and FAD metabolism	GTP cyclohydrolase II (EC 3.5.4.25)	fig|227866.17.peg.342
Cofactors, Vitamins, Prosthetic Groups, Pigments	Riboflavin, FMN, FAD	Riboflavin, FMN and FAD metabolism	Riboflavin synthase eubacterial/eukaryotic (EC 2.5.1.9)	fig|227866.17.peg.341
Cofactors, Vitamins, Prosthetic Groups, Pigments	Riboflavin, FMN, FAD	Riboflavin, FMN and FAD metabolism	Diaminohydroxyphosphoribosylaminopyrimidine deaminase (EC 3.5.4.26)	fig|227866.17.peg.340
Cofactors, Vitamins, Prosthetic Groups, Pigments	Riboflavin, FMN, FAD	Riboflavin, FMN and FAD metabolism	3,4-dihydroxy-2-butanone 4-phosphate synthase (EC 4.1.99.12)	fig|227866.17.peg.342
Cofactors, Vitamins, Prosthetic Groups, Pigments	Pyridoxine	Pyridoxin (Vitamin B6) Biosynthesis	Pyridoxine biosynthesis glutamine amidotransferase, synthase subunit (EC 2.4.2.-)	fig|227866.17.peg.4398
Cofactors, Vitamins, Prosthetic Groups, Pigments	Pyridoxine	Pyridoxin (Vitamin B6) Biosynthesis	Predicted transcriptional regulator of pyridoxine metabolism	fig|227866.17.peg.1745, fig|227866.17.peg.3065
Cofactors, Vitamins, Prosthetic Groups, Pigments	Pyridoxine	Pyridoxin (Vitamin B6) Biosynthesis	D-3-phosphoglycerate dehydrogenase (EC 1.1.1.95)	fig|227866.17.peg.361
Cofactors, Vitamins, Prosthetic Groups, Pigments	Pyridoxine	Pyridoxin (Vitamin B6) Biosynthesis	Pyridoxamine 5'-phosphate oxidase (EC 1.4.3.5)	fig|227866.17.peg.2146, fig|227866.17.peg.3128, fig|227866.17.peg.3712, fig|227866.17.peg.3713, fig|227866.17.peg.3714
Cofactors, Vitamins, Prosthetic Groups, Pigments	Pyridoxine	Pyridoxin (Vitamin B6) Biosynthesis	Phosphoserine aminotransferase (EC 2.6.1.52)	fig|227866.17.peg.1691
Cofactors, Vitamins, Prosthetic Groups, Pigments	Pyridoxine	Pyridoxin (Vitamin B6) Biosynthesis	1-deoxy-D-xylulose 5-phosphate synthase (EC 2.2.1.7)	fig|227866.17.peg.233
Cofactors, Vitamins, Prosthetic Groups, Pigments	Pyridoxine	Pyridoxin (Vitamin B6) Biosynthesis	Pyridoxine biosynthesis glutamine amidotransferase, glutaminase subunit (EC 2.4.2.-)	fig|227866.17.peg.4397
Cofactors, Vitamins, Prosthetic Groups, Pigments	Pyridoxine	Pyridoxin (Vitamin B6) Biosynthesis	NAD-dependent glyceraldehyde-3-phosphate dehydrogenase (EC 1.2.1.12)	fig|227866.17.peg.2623
Cofactors, Vitamins, Prosthetic Groups, Pigments	Pyridoxine	Pyridoxin(Vitamin B6) Degradation Pathway	Hypothetical NagD-like phosphatase	fig|227866.17.peg.2814
Cofactors, Vitamins, Prosthetic Groups, Pigments	NAD and NADP	NAD and NADP cofactor biosynthesis global	Quinolinate synthetase (EC 2.5.1.72)	fig|227866.17.peg.3514
Cofactors, Vitamins, Prosthetic Groups, Pigments	NAD and NADP	NAD and NADP cofactor biosynthesis global	Nicotinate phosphoribosyltransferase (EC 2.4.2.11)	fig|227866.17.peg.2870
Cofactors, Vitamins, Prosthetic Groups, Pigments	NAD and NADP	NAD and NADP cofactor biosynthesis global	Nicotinamidase/isochorismatase family protein	fig|227866.17.peg.2357
Cofactors, Vitamins, Prosthetic Groups, Pigments	NAD and NADP	NAD and NADP cofactor biosynthesis global	Isochorismatase (EC 3.3.2.1) of siderophore biosynthesis	fig|227866.17.peg.2847
Cofactors, Vitamins, Prosthetic Groups, Pigments	NAD and NADP	NAD and NADP cofactor biosynthesis global	Quinolinate phosphoribosyltransferase [decarboxylating] (EC 2.4.2.19)	fig|227866.17.peg.3515
Cofactors, Vitamins, Prosthetic Groups, Pigments	NAD and NADP	NAD and NADP cofactor biosynthesis global	NAD kinase (EC 2.7.1.23)	fig|227866.17.peg.1519, fig|227866.17.peg.3688
Cofactors, Vitamins, Prosthetic Groups, Pigments	NAD and NADP	NAD and NADP cofactor biosynthesis global	N-Ribosylnicotinamide phosphorylase (EC 2.4.2.1)	fig|227866.17.peg.320
Cofactors, Vitamins, Prosthetic Groups, Pigments	NAD and NADP	NAD and NADP cofactor biosynthesis global	Transcriptional repressor for NAD biosynthesis in gram-positives	fig|227866.17.peg.3518
Cofactors, Vitamins, Prosthetic Groups, Pigments	NAD and NADP	NAD and NADP cofactor biosynthesis global	C-terminal domain of CinA type S	fig|227866.17.peg.830, fig|227866.17.peg.830
Cofactors, Vitamins, Prosthetic Groups, Pigments	NAD and NADP	NAD and NADP cofactor biosynthesis global	ADP-ribose pyrophosphatase (EC 3.6.1.13)	fig|227866.17.peg.306
Cofactors, Vitamins, Prosthetic Groups, Pigments	NAD and NADP	NAD and NADP cofactor biosynthesis global	Niacin transporter NiaP	fig|227866.17.peg.1888, fig|227866.17.peg.3285
Cofactors, Vitamins, Prosthetic Groups, Pigments	NAD and NADP	NAD and NADP cofactor biosynthesis global	NAD synthetase (EC 6.3.1.5)	fig|227866.17.peg.3267
Cofactors, Vitamins, Prosthetic Groups, Pigments	NAD and NADP	NAD and NADP cofactor biosynthesis global	L-aspartate oxidase (EC 1.4.3.16)	fig|227866.17.peg.3516
Cofactors, Vitamins, Prosthetic Groups, Pigments	NAD and NADP	NAD and NADP cofactor biosynthesis global	Nicotinate-nucleotide adenylyltransferase (EC 2.7.7.18)	fig|227866.17.peg.88
Cofactors, Vitamins, Prosthetic Groups, Pigments	NAD and NADP	NAD and NADP cofactor biosynthesis global	Nicotinamidase (EC 3.5.1.19)	fig|227866.17.peg.2869, fig|227866.17.peg.4392
Cofactors, Vitamins, Prosthetic Groups, Pigments	Folate and pterines	Folate biosynthesis cluster	Ketopantoate reductase PanG (EC 1.1.1.169)	fig|227866.17.peg.4138
Cofactors, Vitamins, Prosthetic Groups, Pigments	Folate and pterines	Folate biosynthesis cluster	Dihydropteroate synthase (EC 2.5.1.15)	fig|227866.17.peg.4326
Cofactors, Vitamins, Prosthetic Groups, Pigments	Folate and pterines	Folate biosynthesis cluster	tRNA(Ile)-lysidine synthetase (EC 6.3.4.19)	fig|227866.17.peg.4336
Cofactors, Vitamins, Prosthetic Groups, Pigments	Folate and pterines	Folate biosynthesis cluster	Hypoxanthine-guanine phosphoribosyltransferase (EC 2.4.2.8)	fig|227866.17.peg.4335
Cofactors, Vitamins, Prosthetic Groups, Pigments	Folate and pterines	Folate biosynthesis cluster	Aspartate 1-decarboxylase (EC 4.1.1.11)	fig|227866.17.peg.432
Cofactors, Vitamins, Prosthetic Groups, Pigments	Folate and pterines	Folate biosynthesis cluster	Cell division protein FtsH (EC 3.4.24.-)	fig|227866.17.peg.1314, fig|227866.17.peg.4334
Cofactors, Vitamins, Prosthetic Groups, Pigments	Folate and pterines	Folate biosynthesis cluster	GTP cyclohydrolase I (EC 3.5.4.16) type 1	fig|227866.17.peg.393
Cofactors, Vitamins, Prosthetic Groups, Pigments	Folate and pterines	Folate biosynthesis cluster	Pantoate--beta-alanine ligase (EC 6.3.2.1)	fig|227866.17.peg.431
Cofactors, Vitamins, Prosthetic Groups, Pigments	Folate and pterines	Folate biosynthesis cluster	2-amino-4-hydroxy-6-hydroxymethyldihydropteridine pyrophosphokinase (EC 2.7.6.3)	fig|227866.17.peg.4324
Cofactors, Vitamins, Prosthetic Groups, Pigments	Folate and pterines	Folate biosynthesis cluster	Dihydroneopterin aldolase (EC 4.1.2.25)	fig|227866.17.peg.4325
Cofactors, Vitamins, Prosthetic Groups, Pigments	Folate and pterines	Molybdenum cofactor biosynthesis	Molybdenum cofactor biosynthesis protein MoaC	fig|227866.17.peg.3857
Cofactors, Vitamins, Prosthetic Groups, Pigments	Folate and pterines	Molybdenum cofactor biosynthesis	Molybdenum transport system permease protein ModB (TC 3.A.1.8.1)	fig|227866.17.peg.2688
Cofactors, Vitamins, Prosthetic Groups, Pigments	Folate and pterines	Molybdenum cofactor biosynthesis	Molybdenum cofactor biosynthesis protein MoaE	fig|227866.17.peg.1103
Cofactors, Vitamins, Prosthetic Groups, Pigments	Folate and pterines	Molybdenum cofactor biosynthesis	Molybdopterin biosynthesis protein MoeA	fig|227866.17.peg.1105
Cofactors, Vitamins, Prosthetic Groups, Pigments	Folate and pterines	Molybdenum cofactor biosynthesis	GTP cyclohydrolase II (EC 3.5.4.25)	fig|227866.17.peg.342
Cofactors, Vitamins, Prosthetic Groups, Pigments	Folate and pterines	Molybdenum cofactor biosynthesis	Molybdopterin-guanine dinucleotide biosynthesis protein MobA	fig|227866.17.peg.1107
Cofactors, Vitamins, Prosthetic Groups, Pigments	Folate and pterines	Molybdenum cofactor biosynthesis	Molybdenum cofactor biosynthesis protein MoaD	fig|227866.17.peg.1102
Cofactors, Vitamins, Prosthetic Groups, Pigments	Folate and pterines	Molybdenum cofactor biosynthesis	GTP cyclohydrolase I (EC 3.5.4.16) type 1	fig|227866.17.peg.393
Cofactors, Vitamins, Prosthetic Groups, Pigments	Folate and pterines	Molybdenum cofactor biosynthesis	Molybdenum cofactor biosynthesis protein MoaA	fig|227866.17.peg.2331
Cofactors, Vitamins, Prosthetic Groups, Pigments	Folate and pterines	Molybdenum cofactor biosynthesis	Molybdopterin-guanine dinucleotide biosynthesis protein MobB	fig|227866.17.peg.1104
Cofactors, Vitamins, Prosthetic Groups, Pigments	Folate and pterines	Molybdenum cofactor biosynthesis	Molybdenum ABC transporter, periplasmic molybdenum-binding protein ModA (TC 3.A.1.8.1)	fig|227866.17.peg.2689
Cofactors, Vitamins, Prosthetic Groups, Pigments	Folate and pterines	Molybdenum cofactor biosynthesis	FIG060329: MOSC domain protein	fig|227866.17.peg.2949
Cofactors, Vitamins, Prosthetic Groups, Pigments	Folate and pterines	Molybdenum cofactor biosynthesis	Molybdenum cofactor biosynthesis protein MoaB	fig|227866.17.peg.3678
Cofactors, Vitamins, Prosthetic Groups, Pigments	Folate and pterines	Molybdenum cofactor biosynthesis	Molybdopterin biosynthesis protein MoeB	fig|227866.17.peg.1106
Cofactors, Vitamins, Prosthetic Groups, Pigments	Folate and pterines	Folate Biosynthesis	Aminodeoxychorismate lyase (EC 4.1.3.38)	fig|227866.17.peg.4327
Cofactors, Vitamins, Prosthetic Groups, Pigments	Folate and pterines	Folate Biosynthesis	Folylpolyglutamate synthase (EC 6.3.2.17)	fig|227866.17.peg.3539
Cofactors, Vitamins, Prosthetic Groups, Pigments	Folate and pterines	Folate Biosynthesis	GTP cyclohydrolase I (EC 3.5.4.16) type 2	fig|227866.17.peg.3245
Cofactors, Vitamins, Prosthetic Groups, Pigments	Folate and pterines	Folate Biosynthesis	Dihydropteroate synthase (EC 2.5.1.15)	fig|227866.17.peg.4326
Cofactors, Vitamins, Prosthetic Groups, Pigments	Folate and pterines	Folate Biosynthesis	5-formyltetrahydrofolate cyclo-ligase (EC 6.3.3.2)	fig|227866.17.peg.167
Cofactors, Vitamins, Prosthetic Groups, Pigments	Folate and pterines	Folate Biosynthesis	Dihydrofolate reductase (EC 1.5.1.3)	fig|227866.17.peg.493, fig|227866.17.peg.1895, fig|227866.17.peg.2274
Cofactors, Vitamins, Prosthetic Groups, Pigments	Folate and pterines	Folate Biosynthesis	Dihydrofolate synthase (EC 6.3.2.12)	fig|227866.17.peg.3539
Cofactors, Vitamins, Prosthetic Groups, Pigments	Folate and pterines	Folate Biosynthesis	GTP cyclohydrolase I (EC 3.5.4.16) type 1	fig|227866.17.peg.393
Cofactors, Vitamins, Prosthetic Groups, Pigments	Folate and pterines	Folate Biosynthesis	Para-aminobenzoate synthase, aminase component (EC 2.6.1.85)	fig|227866.17.peg.4329
Cofactors, Vitamins, Prosthetic Groups, Pigments	Folate and pterines	Folate Biosynthesis	Thymidylate synthase (EC 2.1.1.45)	fig|227866.17.peg.748
Cofactors, Vitamins, Prosthetic Groups, Pigments	Folate and pterines	Folate Biosynthesis	2-amino-4-hydroxy-6-hydroxymethyldihydropteridine pyrophosphokinase (EC 2.7.6.3)	fig|227866.17.peg.4324
Cofactors, Vitamins, Prosthetic Groups, Pigments	Folate and pterines	Folate Biosynthesis	Dihydroneopterin aldolase (EC 4.1.2.25)	fig|227866.17.peg.4325
Cofactors, Vitamins, Prosthetic Groups, Pigments	Folate and pterines	Folate Biosynthesis	Para-aminobenzoate synthase, amidotransferase component (EC 2.6.1.85)	fig|227866.17.peg.4328
Cofactors, Vitamins, Prosthetic Groups, Pigments	Folate and pterines	5-FCL-like protein	Alcohol dehydrogenase (EC 1.1.1.1)	fig|227866.17.peg.665, fig|227866.17.peg.2948, fig|227866.17.peg.4202
Cofactors, Vitamins, Prosthetic Groups, Pigments	Folate and pterines	5-FCL-like protein	Dihydrofolate reductase (EC 1.5.1.3)	fig|227866.17.peg.493, fig|227866.17.peg.1895, fig|227866.17.peg.2274
Cofactors, Vitamins, Prosthetic Groups, Pigments	Folate and pterines	5-FCL-like protein	Serine hydroxymethyltransferase (EC 2.1.2.1)	fig|227866.17.peg.2309
Cofactors, Vitamins, Prosthetic Groups, Pigments	Folate and pterines	5-FCL-like protein	Phosphoribosylglycinamide formyltransferase (EC 2.1.2.2)	fig|227866.17.peg.3909
Cofactors, Vitamins, Prosthetic Groups, Pigments	Folate and pterines	5-FCL-like protein	Phosphomethylpyrimidine kinase (EC 2.7.4.7)	fig|227866.17.peg.1509
Cofactors, Vitamins, Prosthetic Groups, Pigments	Folate and pterines	5-FCL-like protein	Succinate dehydrogenase iron-sulfur protein (EC 1.3.99.1)	fig|227866.17.peg.3579
Cofactors, Vitamins, Prosthetic Groups, Pigments	Folate and pterines	5-FCL-like protein	Thiaminase II (EC 3.5.99.2)	fig|227866.17.peg.1515
Cofactors, Vitamins, Prosthetic Groups, Pigments	Folate and pterines	5-FCL-like protein	5,10-methylenetetrahydrofolate reductase (EC 1.5.1.20)	fig|227866.17.peg.1585
Cofactors, Vitamins, Prosthetic Groups, Pigments	Folate and pterines	5-FCL-like protein	Hydroxyethylthiazole kinase (EC 2.7.1.50)	fig|227866.17.peg.2159
Cofactors, Vitamins, Prosthetic Groups, Pigments	Folate and pterines	5-FCL-like protein	Formyltetrahydrofolate deformylase (EC 3.5.1.10)	fig|227866.17.peg.1237
Cofactors, Vitamins, Prosthetic Groups, Pigments	Folate and pterines	5-FCL-like protein	Isocitrate dehydrogenase [NADP] (EC 1.1.1.42)	fig|227866.17.peg.3654
Cofactors, Vitamins, Prosthetic Groups, Pigments	Folate and pterines	5-FCL-like protein	5-formyltetrahydrofolate cyclo-ligase (EC 6.3.3.2)	fig|227866.17.peg.167
Cofactors, Vitamins, Prosthetic Groups, Pigments	Folate and pterines	5-FCL-like protein	Methylenetetrahydrofolate dehydrogenase (NADP+) (EC 1.5.1.5)	fig|227866.17.peg.228
Cofactors, Vitamins, Prosthetic Groups, Pigments	Folate and pterines	5-FCL-like protein	Thiamine-monophosphate kinase (EC 2.7.4.16)	fig|227866.17.peg.3851
Cofactors, Vitamins, Prosthetic Groups, Pigments	Folate and pterines	5-FCL-like protein	Phosphoribosylaminoimidazolecarboxamide formyltransferase (EC 2.1.2.3)	fig|227866.17.peg.3910
Cofactors, Vitamins, Prosthetic Groups, Pigments	Folate and pterines	5-FCL-like protein	Dihydrolipoamide acetyltransferase component of pyruvate dehydrogenase complex (EC 2.3.1.12)	fig|227866.17.peg.1071
Cofactors, Vitamins, Prosthetic Groups, Pigments	Folate and pterines	5-FCL-like protein	Thiamin-phosphate pyrophosphorylase (EC 2.5.1.3)	fig|227866.17.peg.1514, fig|227866.17.peg.2160
Cofactors, Vitamins, Prosthetic Groups, Pigments	Lipoic acid	Lipoic acid metabolism	Protein:protein lipoyl transferase	fig|227866.17.peg.2231
Cofactors, Vitamins, Prosthetic Groups, Pigments	Lipoic acid	Lipoic acid metabolism	Lipoate-protein ligase A	fig|227866.17.peg.206, fig|227866.17.peg.1667
Cofactors, Vitamins, Prosthetic Groups, Pigments	Lipoic acid	Lipoic acid metabolism	Lipoate synthase	fig|227866.17.peg.2810
Cofactors, Vitamins, Prosthetic Groups, Pigments	Coenzyme A	Coenzyme A Biosynthesis cluster	Ketopantoate reductase PanG (EC 1.1.1.169)	fig|227866.17.peg.4138
Cofactors, Vitamins, Prosthetic Groups, Pigments	Coenzyme A	Coenzyme A Biosynthesis cluster	3-methyl-2-oxobutanoate hydroxymethyltransferase (EC 2.1.2.11)	fig|227866.17.peg.430
Cofactors, Vitamins, Prosthetic Groups, Pigments	Coenzyme A	Coenzyme A Biosynthesis cluster	Pantoate--beta-alanine ligase (EC 6.3.2.1)	fig|227866.17.peg.431
Cofactors, Vitamins, Prosthetic Groups, Pigments	Coenzyme A	Coenzyme A Biosynthesis cluster	Pantothenate kinase type III, CoaX-like (EC 2.7.1.33)	fig|227866.17.peg.4333
Cofactors, Vitamins, Prosthetic Groups, Pigments	Coenzyme A	Coenzyme A Biosynthesis cluster	Aspartate 1-decarboxylase (EC 4.1.1.11)	fig|227866.17.peg.432
Cofactors, Vitamins, Prosthetic Groups, Pigments	Coenzyme A	Coenzyme A Biosynthesis	Ketopantoate reductase PanG (EC 1.1.1.169)	fig|227866.17.peg.4138
Cofactors, Vitamins, Prosthetic Groups, Pigments	Coenzyme A	Coenzyme A Biosynthesis	3-methyl-2-oxobutanoate hydroxymethyltransferase (EC 2.1.2.11)	fig|227866.17.peg.430
Cofactors, Vitamins, Prosthetic Groups, Pigments	Coenzyme A	Coenzyme A Biosynthesis	Pantothenate kinase (EC 2.7.1.33)	fig|227866.17.peg.289
Cofactors, Vitamins, Prosthetic Groups, Pigments	Coenzyme A	Coenzyme A Biosynthesis	Dephospho-CoA kinase (EC 2.7.1.24)	fig|227866.17.peg.3434, fig|227866.17.peg.3646
Cofactors, Vitamins, Prosthetic Groups, Pigments	Coenzyme A	Coenzyme A Biosynthesis	Pantothenate kinase type III, CoaX-like (EC 2.7.1.33)	fig|227866.17.peg.4333
Cofactors, Vitamins, Prosthetic Groups, Pigments	Coenzyme A	Coenzyme A Biosynthesis	Aspartate 1-decarboxylase (EC 4.1.1.11)	fig|227866.17.peg.432
Cofactors, Vitamins, Prosthetic Groups, Pigments	Coenzyme A	Coenzyme A Biosynthesis	2-dehydropantoate 2-reductase (EC 1.1.1.169)	fig|227866.17.peg.1012, fig|227866.17.peg.1089
Cofactors, Vitamins, Prosthetic Groups, Pigments	Coenzyme A	Coenzyme A Biosynthesis	Phosphopantetheine adenylyltransferase (EC 2.7.7.3)	fig|227866.17.peg.1022
Cofactors, Vitamins, Prosthetic Groups, Pigments	Coenzyme A	Coenzyme A Biosynthesis	Ketol-acid reductoisomerase (EC 1.1.1.86)	fig|227866.17.peg.3562
Cofactors, Vitamins, Prosthetic Groups, Pigments	Coenzyme A	Coenzyme A Biosynthesis	Phosphopantothenoylcysteine synthetase (EC 6.3.2.5)	fig|227866.17.peg.952
Cofactors, Vitamins, Prosthetic Groups, Pigments	Coenzyme A	Coenzyme A Biosynthesis	Phosphopantothenoylcysteine decarboxylase (EC 4.1.1.36)	fig|227866.17.peg.952
Cofactors, Vitamins, Prosthetic Groups, Pigments	Coenzyme A	Coenzyme A Biosynthesis	Pantoate--beta-alanine ligase (EC 6.3.2.1)	fig|227866.17.peg.431
Cell Wall and Capsule	Capsular and extracellular polysacchrides	dTDP-rhamnose synthesis	dTDP-4-dehydrorhamnose reductase (EC 1.1.1.133)	fig|227866.17.peg.2211
Cell Wall and Capsule	Capsular and extracellular polysacchrides	dTDP-rhamnose synthesis	Glucose-1-phosphate cytidylyltransferase (EC 2.7.7.33)	fig|227866.17.peg.3986
Cell Wall and Capsule	Capsular and extracellular polysacchrides	dTDP-rhamnose synthesis	dTDP-glucose 4,6-dehydratase (EC 4.2.1.46)	fig|227866.17.peg.2210
Cell Wall and Capsule	Capsular and extracellular polysacchrides	dTDP-rhamnose synthesis	dTDP-4-dehydrorhamnose 3,5-epimerase (EC 5.1.3.13)	fig|227866.17.peg.2212
Cell Wall and Capsule	Capsular and extracellular polysacchrides	dTDP-rhamnose synthesis	Glucose-1-phosphate thymidylyltransferase (EC 2.7.7.24)	fig|227866.17.peg.2209
Cell Wall and Capsule	Capsular and extracellular polysacchrides	CMP-N-acetylneuraminate Biosynthesis	N-acetylneuraminate synthase (EC 2.5.1.56)	fig|227866.17.peg.2206
Cell Wall and Capsule	Capsular and extracellular polysacchrides	CMP-N-acetylneuraminate Biosynthesis	N-Acetylneuraminate cytidylyltransferase (EC 2.7.7.43)	fig|227866.17.peg.2208
Cell Wall and Capsule	Capsular and extracellular polysacchrides	CMP-N-acetylneuraminate Biosynthesis	UDP-N-acetylglucosamine 2-epimerase (EC 5.1.3.14)	fig|227866.17.peg.2447
Cell Wall and Capsule	Capsular and extracellular polysacchrides	Polysaccharide deacetylases	Peptidoglycan N-acetylglucosamine deacetylase (EC 3.5.1.-)	fig|227866.17.peg.1353, fig|227866.17.peg.1728, fig|227866.17.peg.3054
Cell Wall and Capsule	Capsular and extracellular polysacchrides	Polysaccharide deacetylases	Polysaccharide deacetylase	fig|227866.17.peg.2101, fig|227866.17.peg.4059
Cell Wall and Capsule	Capsular and extracellular polysacchrides	Rhamnose containing glycans	UDP-glucose 4-epimerase (EC 5.1.3.2)	fig|227866.17.peg.2092, fig|227866.17.peg.3753, fig|227866.17.peg.3825, fig|227866.17.peg.3987
Cell Wall and Capsule	Capsular and extracellular polysacchrides	Rhamnose containing glycans	dTDP-4-dehydrorhamnose reductase (EC 1.1.1.133)	fig|227866.17.peg.2211
Cell Wall and Capsule	Capsular and extracellular polysacchrides	Rhamnose containing glycans	capsular polysaccharide biosynthesis protein	fig|227866.17.peg.2585, fig|227866.17.peg.2586
Cell Wall and Capsule	Capsular and extracellular polysacchrides	Rhamnose containing glycans	Teichoic acid export ATP-binding protein TagH (EC 3.6.3.40)	fig|227866.17.peg.2442
Cell Wall and Capsule	Capsular and extracellular polysacchrides	Rhamnose containing glycans	dTDP-glucose 4,6-dehydratase (EC 4.2.1.46)	fig|227866.17.peg.2210
Cell Wall and Capsule	Capsular and extracellular polysacchrides	Rhamnose containing glycans	dTDP-4-dehydrorhamnose 3,5-epimerase (EC 5.1.3.13)	fig|227866.17.peg.2212
Cell Wall and Capsule	Capsular and extracellular polysacchrides	Rhamnose containing glycans	Glycerol-3-phosphate cytidylyltransferase (EC 2.7.7.39)	fig|227866.17.peg.2437
Cell Wall and Capsule	Capsular and extracellular polysacchrides	Rhamnose containing glycans	Glucose-1-phosphate thymidylyltransferase (EC 2.7.7.24)	fig|227866.17.peg.2209
Cell Wall and Capsule	Capsular and extracellular polysacchrides	Exopolysaccharide Biosynthesis	Manganese-dependent protein-tyrosine phosphatase (EC 3.1.3.48)	fig|227866.17.peg.2385
Cell Wall and Capsule	Capsular and extracellular polysacchrides	Exopolysaccharide Biosynthesis	Tyrosine-protein kinase transmembrane modulator EpsC	fig|227866.17.peg.2383, fig|227866.17.peg.2580
Cell Wall and Capsule	Capsular and extracellular polysacchrides	Exopolysaccharide Biosynthesis	Tyrosine-protein kinase EpsD (EC 2.7.10.2)	fig|227866.17.peg.2384, fig|227866.17.peg.2581
Cell Wall and Capsule	Capsular and extracellular polysacchrides	Exopolysaccharide Biosynthesis	Glycosyl transferase, group 2 family protein	fig|227866.17.peg.73, fig|227866.17.peg.2587
Cell Wall and Capsule	Capsular and extracellular polysacchrides	Exopolysaccharide Biosynthesis	Glycosyl transferase, group 1 family protein	fig|227866.17.peg.426
Cell Wall and Capsule	Capsular and extracellular polysacchrides	Exopolysaccharide Biosynthesis	Undecaprenyl-phosphate galactosephosphotransferase (EC 2.7.8.6)	fig|227866.17.peg.2453
Cell Wall and Capsule	Capsular and extracellular polysacchrides	Sialic Acid Metabolism	PTS system, mannose-specific IIB component (EC 2.7.1.69)	fig|227866.17.peg.1363, fig|227866.17.peg.4207, fig|227866.17.peg.4208
Cell Wall and Capsule	Capsular and extracellular polysacchrides	Sialic Acid Metabolism	Glucosamine-1-phosphate N-acetyltransferase (EC 2.3.1.157)	fig|227866.17.peg.4353, fig|227866.17.peg.4381
Cell Wall and Capsule	Capsular and extracellular polysacchrides	Sialic Acid Metabolism	PTS system, mannose-specific IIC component (EC 2.7.1.69)	fig|227866.17.peg.1363, fig|227866.17.peg.4206
Cell Wall and Capsule	Capsular and extracellular polysacchrides	Sialic Acid Metabolism	Glucosamine-6-phosphate deaminase (EC 3.5.99.6)	fig|227866.17.peg.2514, fig|227866.17.peg.3348
Cell Wall and Capsule	Capsular and extracellular polysacchrides	Sialic Acid Metabolism	Glucosamine--fructose-6-phosphate aminotransferase [isomerizing] (EC 2.6.1.16)	fig|227866.17.peg.3396
Cell Wall and Capsule	Capsular and extracellular polysacchrides	Sialic Acid Metabolism	PTS system, mannose-specific IIA component (EC 2.7.1.69)	fig|227866.17.peg.1363, fig|227866.17.peg.4207, fig|227866.17.peg.4208
Cell Wall and Capsule	Capsular and extracellular polysacchrides	Sialic Acid Metabolism	UDP-N-acetylglucosamine 2-epimerase (EC 5.1.3.14)	fig|227866.17.peg.2447
Cell Wall and Capsule	Capsular and extracellular polysacchrides	Sialic Acid Metabolism	PTS system, mannose-specific IID component (EC 2.7.1.69)	fig|227866.17.peg.4205
Cell Wall and Capsule	Capsular and extracellular polysacchrides	Sialic Acid Metabolism	PTS system, N-acetylglucosamine-specific IIB component (EC 2.7.1.69)	fig|227866.17.peg.4031
Cell Wall and Capsule	Capsular and extracellular polysacchrides	Sialic Acid Metabolism	N-acetylneuraminate synthase (EC 2.5.1.56)	fig|227866.17.peg.2206
Cell Wall and Capsule	Capsular and extracellular polysacchrides	Sialic Acid Metabolism	Phosphoglucosamine mutase (EC 5.4.2.10)	fig|227866.17.peg.3398
Cell Wall and Capsule	Capsular and extracellular polysacchrides	Sialic Acid Metabolism	PTS system, N-acetylglucosamine-specific IIC component (EC 2.7.1.69)	fig|227866.17.peg.4031
Cell Wall and Capsule	Capsular and extracellular polysacchrides	Sialic Acid Metabolism	N-acetylglucosamine-1-phosphate uridyltransferase (EC 2.7.7.23)	fig|227866.17.peg.4353, fig|227866.17.peg.4381
Cell Wall and Capsule	Capsular and extracellular polysacchrides	Sialic Acid Metabolism	N-Acetylneuraminate cytidylyltransferase (EC 2.7.7.43)	fig|227866.17.peg.2208
Cell Wall and Capsule	Capsular and extracellular polysacchrides	Sialic Acid Metabolism	N-acetylglucosamine-6-phosphate deacetylase (EC 3.5.1.25)	fig|227866.17.peg.2515
Cell Wall and Capsule	Cell Wall and Capsule - no subcategory	Murein Hydrolases	Membrane-bound lytic murein transglycosylase D precursor (EC 3.2.1.-)	fig|227866.17.peg.1161, fig|227866.17.peg.1523
Cell Wall and Capsule	Cell Wall and Capsule - no subcategory	Murein Hydrolases	N-acetylmuramoyl-L-alanine amidase (EC 3.5.1.28)	fig|227866.17.peg.779, fig|227866.17.peg.2450, fig|227866.17.peg.2451, fig|227866.17.peg.3484
Cell Wall and Capsule	Cell Wall and Capsule - no subcategory	Murein Hydrolases	D-alanyl-D-alanine carboxypeptidase (EC 3.4.16.4)	fig|227866.17.peg.321, fig|227866.17.peg.349, fig|227866.17.peg.533, fig|227866.17.peg.673, fig|227866.17.peg.2573, fig|227866.17.peg.4399
Cell Wall and Capsule	Cell Wall and Capsule - no subcategory	Murein Hydrolases	Muramoyltetrapeptide carboxypeptidase (EC 3.4.17.13)	fig|227866.17.peg.583, fig|227866.17.peg.1251
Cell Wall and Capsule	Cell Wall and Capsule - no subcategory	Peptidoglycan Biosynthesis	Glucosamine-1-phosphate N-acetyltransferase (EC 2.3.1.157)	fig|227866.17.peg.4353, fig|227866.17.peg.4381
Cell Wall and Capsule	Cell Wall and Capsule - no subcategory	Peptidoglycan Biosynthesis	UDP-N-acetylmuramoylalanyl-D-glutamate--2,6-diaminopimelate ligase (EC 6.3.2.13)	fig|227866.17.peg.1005
Cell Wall and Capsule	Cell Wall and Capsule - no subcategory	Peptidoglycan Biosynthesis	Monofunctional biosynthetic peptidoglycan transglycosylase (EC 2.4.2.-)	fig|227866.17.peg.2246
Cell Wall and Capsule	Cell Wall and Capsule - no subcategory	Peptidoglycan Biosynthesis	D-alanyl-D-alanine carboxypeptidase (EC 3.4.16.4)	fig|227866.17.peg.321, fig|227866.17.peg.349, fig|227866.17.peg.533, fig|227866.17.peg.673, fig|227866.17.peg.2573, fig|227866.17.peg.4399
Cell Wall and Capsule	Cell Wall and Capsule - no subcategory	Peptidoglycan Biosynthesis	Cell division protein FtsI [Peptidoglycan synthetase] (EC 2.4.1.129)	fig|227866.17.peg.155, fig|227866.17.peg.1006, fig|227866.17.peg.1135, fig|227866.17.peg.3454
Cell Wall and Capsule	Cell Wall and Capsule - no subcategory	Peptidoglycan Biosynthesis	UDP-N-acetylenolpyruvoylglucosamine reductase (EC 1.1.1.158)	fig|227866.17.peg.1000
Cell Wall and Capsule	Cell Wall and Capsule - no subcategory	Peptidoglycan Biosynthesis	Glutamine synthetase type I (EC 6.3.1.2)	fig|227866.17.peg.772
Cell Wall and Capsule	Cell Wall and Capsule - no subcategory	Peptidoglycan Biosynthesis	UDP-N-acetylglucosamine 1-carboxyvinyltransferase (EC 2.5.1.7)	fig|227866.17.peg.2287, fig|227866.17.peg.2323
Cell Wall and Capsule	Cell Wall and Capsule - no subcategory	Peptidoglycan Biosynthesis	UDP-N-acetylmuramoylalanine--D-glutamate ligase (EC 6.3.2.9)	fig|227866.17.peg.1003
Cell Wall and Capsule	Cell Wall and Capsule - no subcategory	Peptidoglycan Biosynthesis	UDP-N-acetylglucosamine--N-acetylmuramyl-(pentapeptide) pyrophosphoryl-undecaprenol N-acetylglucosamine transferase (EC 2.4.1.227)	fig|227866.17.peg.1001
Cell Wall and Capsule	Cell Wall and Capsule - no subcategory	Peptidoglycan Biosynthesis	UDP-N-acetylmuramoylalanyl-D-glutamyl-2,6-diaminopimelate--D-alanyl-D-alanine ligase (EC 6.3.2.10)	fig|227866.17.peg.3109
Cell Wall and Capsule	Cell Wall and Capsule - no subcategory	Peptidoglycan Biosynthesis	Glutamate racemase (EC 5.1.1.3)	fig|227866.17.peg.3574, fig|227866.17.peg.4182
Cell Wall and Capsule	Cell Wall and Capsule - no subcategory	Peptidoglycan Biosynthesis	UDP-N-acetylmuramate--alanine ligase (EC 6.3.2.8)	fig|227866.17.peg.3715
Cell Wall and Capsule	Cell Wall and Capsule - no subcategory	Peptidoglycan Biosynthesis	D-alanine--D-alanine ligase (EC 6.3.2.4)	fig|227866.17.peg.3110
Cell Wall and Capsule	Cell Wall and Capsule - no subcategory	Peptidoglycan Biosynthesis	Phospho-N-acetylmuramoyl-pentapeptide-transferase (EC 2.7.8.13)	fig|227866.17.peg.1004, fig|227866.17.peg.4320
Cell Wall and Capsule	Cell Wall and Capsule - no subcategory	Peptidoglycan Biosynthesis	N-acetylglucosamine-1-phosphate uridyltransferase (EC 2.7.7.23)	fig|227866.17.peg.4353, fig|227866.17.peg.4381
Cell Wall and Capsule	Cell Wall and Capsule - no subcategory	Peptidoglycan Biosynthesis	Multimodular transpeptidase-transglycosylase (EC 2.4.1.129) (EC 3.4.-.-)	fig|227866.17.peg.441, fig|227866.17.peg.1681, fig|227866.17.peg.2896
Cell Wall and Capsule	Cell Wall and Capsule - no subcategory	UDP-N-acetylmuramate from Fructose-6-phosphate Biosynthesis	UDP-N-acetylenolpyruvoylglucosamine reductase (EC 1.1.1.158)	fig|227866.17.peg.1000
Cell Wall and Capsule	Cell Wall and Capsule - no subcategory	UDP-N-acetylmuramate from Fructose-6-phosphate Biosynthesis	Glucosamine-1-phosphate N-acetyltransferase (EC 2.3.1.157)	fig|227866.17.peg.4353, fig|227866.17.peg.4381
Cell Wall and Capsule	Cell Wall and Capsule - no subcategory	UDP-N-acetylmuramate from Fructose-6-phosphate Biosynthesis	Glucosamine--fructose-6-phosphate aminotransferase [isomerizing] (EC 2.6.1.16)	fig|227866.17.peg.3396
Cell Wall and Capsule	Cell Wall and Capsule - no subcategory	UDP-N-acetylmuramate from Fructose-6-phosphate Biosynthesis	UDP-N-acetylglucosamine 1-carboxyvinyltransferase (EC 2.5.1.7)	fig|227866.17.peg.2287, fig|227866.17.peg.2323
Cell Wall and Capsule	Cell Wall and Capsule - no subcategory	UDP-N-acetylmuramate from Fructose-6-phosphate Biosynthesis	Phosphoglucosamine mutase (EC 5.4.2.10)	fig|227866.17.peg.3398
Cell Wall and Capsule	Cell Wall and Capsule - no subcategory	UDP-N-acetylmuramate from Fructose-6-phosphate Biosynthesis	N-acetylglucosamine-1-phosphate uridyltransferase (EC 2.7.7.23)	fig|227866.17.peg.4353, fig|227866.17.peg.4381
Cell Wall and Capsule	Cell Wall and Capsule - no subcategory	YjeE	TsaB protein, required for threonylcarbamoyladenosine (t(6)A) formation in tRNA	fig|227866.17.peg.3853
Cell Wall and Capsule	Cell Wall and Capsule - no subcategory	YjeE	TsaE protein, required for threonylcarbamoyladenosine t(6)A37 formation in tRNA	fig|227866.17.peg.3852
Cell Wall and Capsule	Cell Wall and Capsule - no subcategory	YjeE	NAD(P)HX dehydratase	fig|227866.17.peg.2110
Cell Wall and Capsule	Cell Wall and Capsule - no subcategory	Recycling of Peptidoglycan Amino Acids	L-alanine-DL-glutamate epimerase	fig|227866.17.peg.1250
Cell Wall and Capsule	Cell Wall and Capsule - no subcategory	Recycling of Peptidoglycan Amino Acids	N-acetylmuramoyl-L-alanine amidase (EC 3.5.1.28)	fig|227866.17.peg.779, fig|227866.17.peg.2450, fig|227866.17.peg.2451, fig|227866.17.peg.3484
Cell Wall and Capsule	Cell Wall and Capsule - no subcategory	Recycling of Peptidoglycan Amino Acids	Muramoyltetrapeptide carboxypeptidase (EC 3.4.17.13)	fig|227866.17.peg.583, fig|227866.17.peg.1251
Cell Wall and Capsule	Cell Wall and Capsule - no subcategory	Peptidoglycan biosynthesis--gjo	UDP-N-acetylmuramate--alanine ligase (EC 6.3.2.8)	fig|227866.17.peg.3715
Cell Wall and Capsule	Cell Wall and Capsule - no subcategory	Peptidoglycan biosynthesis--gjo	UDP-N-acetylmuramoylalanine--D-glutamate ligase (EC 6.3.2.9)	fig|227866.17.peg.1003
Cell Wall and Capsule	Cell Wall and Capsule - no subcategory	Peptidoglycan biosynthesis--gjo	UDP-N-acetylmuramoylalanyl-D-glutamate--2,6-diaminopimelate ligase (EC 6.3.2.13)	fig|227866.17.peg.1005
Cell Wall and Capsule	Cell Wall and Capsule - no subcategory	Peptidoglycan biosynthesis--gjo	D-alanine--D-alanine ligase (EC 6.3.2.4)	fig|227866.17.peg.3110
Cell Wall and Capsule	Cell Wall and Capsule - no subcategory	Peptidoglycan biosynthesis--gjo	UDP-N-acetylmuramoylalanyl-D-glutamyl-2,6-diaminopimelate--D-alanyl-D-alanine ligase (EC 6.3.2.10)	fig|227866.17.peg.3109
Cell Wall and Capsule	Gram-Positive cell wall components	Teichoic and lipoteichoic acids biosynthesis	Putative polyribitolphosphotransferase	fig|227866.17.peg.2430
Cell Wall and Capsule	Gram-Positive cell wall components	Teichoic and lipoteichoic acids biosynthesis	Poly(glycerophosphate chain) D-alanine transfer protein DltD	fig|227866.17.peg.2129
Cell Wall and Capsule	Gram-Positive cell wall components	Teichoic and lipoteichoic acids biosynthesis	Minor teichoic acid biosynthesis protein GgaA	fig|227866.17.peg.2439
Cell Wall and Capsule	Gram-Positive cell wall components	Teichoic and lipoteichoic acids biosynthesis	N-acetylmannosaminyltransferase (EC 2.4.1.187)	fig|227866.17.peg.2436
Cell Wall and Capsule	Gram-Positive cell wall components	Teichoic and lipoteichoic acids biosynthesis	Poly(glycerol-phosphate) alpha-glucosyltransferase (EC 2.4.1.52)	fig|227866.17.peg.2444, fig|227866.17.peg.2445
Cell Wall and Capsule	Gram-Positive cell wall components	Teichoic and lipoteichoic acids biosynthesis	D-alanine--poly(phosphoribitol) ligase subunit 2 (EC 6.1.1.13)	fig|227866.17.peg.2130
Cell Wall and Capsule	Gram-Positive cell wall components	Teichoic and lipoteichoic acids biosynthesis	Undecaprenyl-phosphate N-acetylglucosaminyl 1-phosphate transferase (EC 2.7.8.-)	fig|227866.17.peg.2461
Cell Wall and Capsule	Gram-Positive cell wall components	Teichoic and lipoteichoic acids biosynthesis	Teichoic acid translocation permease protein TagG	fig|227866.17.peg.2441
Cell Wall and Capsule	Gram-Positive cell wall components	Teichoic and lipoteichoic acids biosynthesis	Minor teichoic acid biosynthesis protein GgaB	fig|227866.17.peg.2440
Cell Wall and Capsule	Gram-Positive cell wall components	Teichoic and lipoteichoic acids biosynthesis	ribitol-5-phosphate cytidylyltransferase (EC 2.7.7.40)	fig|227866.17.peg.2433
Cell Wall and Capsule	Gram-Positive cell wall components	Teichoic and lipoteichoic acids biosynthesis	diglucosyldiacylglycerol synthase (LTA membrane anchor synthesis)	fig|227866.17.peg.482, fig|227866.17.peg.1210
Cell Wall and Capsule	Gram-Positive cell wall components	Teichoic and lipoteichoic acids biosynthesis	Teichoic acid export ATP-binding protein TagH (EC 3.6.3.40)	fig|227866.17.peg.2442
Cell Wall and Capsule	Gram-Positive cell wall components	Teichoic and lipoteichoic acids biosynthesis	D-alanyl transfer protein DltB	fig|227866.17.peg.2131
Cell Wall and Capsule	Gram-Positive cell wall components	Teichoic and lipoteichoic acids biosynthesis	CDP-glycerol: N-acetyl-beta-D-mannosaminyl-1,4-N-acetyl-D-glucosaminyldiphosphoundecaprenyl glycerophosphotransferase	fig|227866.17.peg.2434
Cell Wall and Capsule	Gram-Positive cell wall components	Teichoic and lipoteichoic acids biosynthesis	CDP-glycerol:poly(glycerophosphate) glycerophosphotransferase (EC 2.7.8.12)	fig|227866.17.peg.2438
Cell Wall and Capsule	Gram-Positive cell wall components	Teichoic and lipoteichoic acids biosynthesis	D-alanine--poly(phosphoribitol) ligase subunit 1 (EC 6.1.1.13)	fig|227866.17.peg.2132
Cell Wall and Capsule	Gram-Positive cell wall components	Teichoic and lipoteichoic acids biosynthesis	2-C-methyl-D-erythritol 4-phosphate cytidylyltransferase (EC 2.7.7.60)	fig|227866.17.peg.4246
Cell Wall and Capsule	Gram-Positive cell wall components	D-Alanyl Lipoteichoic Acid Biosynthesis	Poly(glycerophosphate chain) D-alanine transfer protein DltD	fig|227866.17.peg.2129
Cell Wall and Capsule	Gram-Positive cell wall components	D-Alanyl Lipoteichoic Acid Biosynthesis	D-alanyl transfer protein DltB	fig|227866.17.peg.2131
Cell Wall and Capsule	Gram-Positive cell wall components	D-Alanyl Lipoteichoic Acid Biosynthesis	D-alanine--poly(phosphoribitol) ligase subunit 1 (EC 6.1.1.13)	fig|227866.17.peg.2132
Cell Wall and Capsule	Gram-Positive cell wall components	D-Alanyl Lipoteichoic Acid Biosynthesis	D-alanine--poly(phosphoribitol) ligase subunit 2 (EC 6.1.1.13)	fig|227866.17.peg.2130
Cell Wall and Capsule	Gram-Positive cell wall components	Teichuronic acid biosynthesis	Teichuronic acid biosynthesis protein TuaF	fig|227866.17.peg.2458
Cell Wall and Capsule	Gram-Positive cell wall components	Teichuronic acid biosynthesis	Teichuronic acid biosynthesis protein TuaE, putative secreted polysaccharide polymerase	fig|227866.17.peg.2457
Cell Wall and Capsule	Gram-Positive cell wall components	Teichuronic acid biosynthesis	Putative teichuronic acid biosynthesis glycosyl transferase TuaH	fig|227866.17.peg.2460
Cell Wall and Capsule	Gram-Positive cell wall components	Teichuronic acid biosynthesis	Teichuronic acid biosynthesis protein TuaB	fig|227866.17.peg.2454
Cell Wall and Capsule	Gram-Positive cell wall components	Teichuronic acid biosynthesis	Putative N-acetylgalactosaminyl-diphosphoundecaprenol glucuronosyltransferase	fig|227866.17.peg.2459
Cell Wall and Capsule	Gram-Positive cell wall components	Sortase	Sortase A, LPXTG specific	fig|227866.17.peg.2373
Cell Wall and Capsule	Gram-Positive cell wall components	Polyglycerolphosphate lipoteichoic acid biosynthesis	Lipoteichoic acid synthase LtaS Type Ia	fig|227866.17.peg.4032
Cell Wall and Capsule	Gram-Positive cell wall components	Polyglycerolphosphate lipoteichoic acid biosynthesis	Lipoteichoic acid synthase LtaS Type IIIa	fig|227866.17.peg.172, fig|227866.17.peg.2691
Cell Wall and Capsule	Gram-Positive cell wall components	Polyglycerolphosphate lipoteichoic acid biosynthesis	Lipoteichoic acid synthase LtaS Type Ib	fig|227866.17.peg.3984
Virulence, Disease and Defense	Adhesion	Streptococcus pyogenes recombinatorial zone	Chaperonin (heat shock protein 33)	fig|227866.17.peg.4332
Virulence, Disease and Defense	Bacteriocins, ribosomally synthesized antibacterial peptides	Bacitracin Stress Response	Two-component response regulator YvcP	fig|227866.17.peg.2003, fig|227866.17.peg.2545
Virulence, Disease and Defense	Bacteriocins, ribosomally synthesized antibacterial peptides	Bacitracin Stress Response	Response regulator LiaR	fig|227866.17.peg.2726
Virulence, Disease and Defense	Bacteriocins, ribosomally synthesized antibacterial peptides	Bacitracin Stress Response	Protein LiaH, similar to phage shock protein A	fig|227866.17.peg.2722
Virulence, Disease and Defense	Bacteriocins, ribosomally synthesized antibacterial peptides	Bacitracin Stress Response	ABC transporter ATP-binding protein YvcR	fig|227866.17.peg.1097, fig|227866.17.peg.2005, fig|227866.17.peg.2547, fig|227866.17.peg.3202
Virulence, Disease and Defense	Bacteriocins, ribosomally synthesized antibacterial peptides	Bacitracin Stress Response	Two-component sensor histidine kinase BceS	fig|227866.17.peg.3776
Virulence, Disease and Defense	Bacteriocins, ribosomally synthesized antibacterial peptides	Bacitracin Stress Response	Two-component response regulator BceR	fig|227866.17.peg.3777
Virulence, Disease and Defense	Bacteriocins, ribosomally synthesized antibacterial peptides	Bacitracin Stress Response	Conserved protein LiaG in B. subtilis in Lia cluster	fig|227866.17.peg.2723
Virulence, Disease and Defense	Bacteriocins, ribosomally synthesized antibacterial peptides	Bacitracin Stress Response	Transporter LiaF	fig|227866.17.peg.2724
Virulence, Disease and Defense	Bacteriocins, ribosomally synthesized antibacterial peptides	Bacitracin Stress Response	Sensor histidine kinase LiaS	fig|227866.17.peg.2725
Virulence, Disease and Defense	Bacteriocins, ribosomally synthesized antibacterial peptides	Bacitracin Stress Response	Protein LiaI	fig|227866.17.peg.2721
Virulence, Disease and Defense	Bacteriocins, ribosomally synthesized antibacterial peptides	Bacitracin Stress Response	Bacitracin export ATP-binding protein BceA	fig|227866.17.peg.3775
Virulence, Disease and Defense	Bacteriocins, ribosomally synthesized antibacterial peptides	Bacitracin Stress Response	Two-component sensor kinase YvcQ	fig|227866.17.peg.2004, fig|227866.17.peg.2546
Virulence, Disease and Defense	Bacteriocins, ribosomally synthesized antibacterial peptides	Bacitracin Stress Response	ABC transporter permease protein YvcS	fig|227866.17.peg.2006, fig|227866.17.peg.2548
Virulence, Disease and Defense	Bacteriocins, ribosomally synthesized antibacterial peptides	Bacitracin Stress Response	Bacitracin export permease protein BceB	fig|227866.17.peg.3774
Virulence, Disease and Defense	Resistance to antibiotics and toxic compounds	Copper homeostasis	Copper-translocating P-type ATPase (EC 3.6.3.4)	fig|227866.17.peg.1152, fig|227866.17.peg.2674, fig|227866.17.peg.2675
Virulence, Disease and Defense	Resistance to antibiotics and toxic compounds	Copper homeostasis	Copper resistance protein D	fig|227866.17.peg.3177
Virulence, Disease and Defense	Resistance to antibiotics and toxic compounds	Bile hydrolysis	Choloylglycine hydrolase (EC 3.5.1.24)	fig|227866.17.peg.2015
Virulence, Disease and Defense	Resistance to antibiotics and toxic compounds	Cobalt-zinc-cadmium resistance	Cobalt-zinc-cadmium resistance protein	fig|227866.17.peg.3037, fig|227866.17.peg.3112
Virulence, Disease and Defense	Resistance to antibiotics and toxic compounds	Cobalt-zinc-cadmium resistance	Cobalt-zinc-cadmium resistance protein CzcD	fig|227866.17.peg.4170
Virulence, Disease and Defense	Resistance to antibiotics and toxic compounds	Cobalt-zinc-cadmium resistance	Transcriptional regulator, MerR family	fig|227866.17.peg.773
Virulence, Disease and Defense	Resistance to antibiotics and toxic compounds	Resistance to Vancomycin	Vancomycin B-type resistance protein VanW	fig|227866.17.peg.625
Virulence, Disease and Defense	Resistance to antibiotics and toxic compounds	Multidrug Resistance, 2-protein version Found in Gram-positive bacteria	Multidrug resistance protein [function not yet clear]	fig|227866.17.peg.1796
Virulence, Disease and Defense	Resistance to antibiotics and toxic compounds	Multidrug Resistance, 2-protein version Found in Gram-positive bacteria	Membrane component of multidrug resistance system	fig|227866.17.peg.1795
Virulence, Disease and Defense	Resistance to antibiotics and toxic compounds	Streptothricin resistance	Streptothricin acetyltransferase, Streptomyces lavendulae type	fig|227866.17.peg.1893, fig|227866.17.peg.1897
Virulence, Disease and Defense	Resistance to antibiotics and toxic compounds	Resistance to fluoroquinolones	DNA gyrase subunit B (EC 5.99.1.3)	fig|227866.17.peg.1861
Virulence, Disease and Defense	Resistance to antibiotics and toxic compounds	Resistance to fluoroquinolones	DNA gyrase subunit A (EC 5.99.1.3)	fig|227866.17.peg.1859
Virulence, Disease and Defense	Resistance to antibiotics and toxic compounds	Resistance to fluoroquinolones	Topoisomerase IV subunit B (EC 5.99.1.-)	fig|227866.17.peg.699
Virulence, Disease and Defense	Resistance to antibiotics and toxic compounds	Resistance to fluoroquinolones	Topoisomerase IV subunit A (EC 5.99.1.-)	fig|227866.17.peg.698
Virulence, Disease and Defense	Resistance to antibiotics and toxic compounds	Arsenic resistance	Arsenical resistance operon repressor	fig|227866.17.peg.3060
Virulence, Disease and Defense	Resistance to antibiotics and toxic compounds	Arsenic resistance	Arsenic efflux pump protein	fig|227866.17.peg.2404, fig|227866.17.peg.3059
Virulence, Disease and Defense	Resistance to antibiotics and toxic compounds	Arsenic resistance	Arsenate reductase (EC 1.20.4.1)	fig|227866.17.peg.2756, fig|227866.17.peg.3058
Virulence, Disease and Defense	Resistance to antibiotics and toxic compounds	Fosfomycin resistance	Fosfomycin resistance protein FosB	fig|227866.17.peg.726
Virulence, Disease and Defense	Resistance to antibiotics and toxic compounds	Multidrug Resistance Operon mdtRP of Bacillus	Multidrug efflux transporter MdtP	fig|227866.17.peg.2747
Virulence, Disease and Defense	Resistance to antibiotics and toxic compounds	Multidrug Resistance Operon mdtRP of Bacillus	MdtR transcriptional regulator, MarR family	fig|227866.17.peg.2748
Virulence, Disease and Defense	Resistance to antibiotics and toxic compounds	Beta-lactamase	Beta-lactamase class A	fig|227866.17.peg.616
Virulence, Disease and Defense	Resistance to antibiotics and toxic compounds	Beta-lactamase	Beta-lactamase class C and other penicillin binding proteins	fig|227866.17.peg.3408
Virulence, Disease and Defense	Resistance to antibiotics and toxic compounds	Beta-lactamase	Metal-dependent hydrolases of the beta-lactamase superfamily I	fig|227866.17.peg.1668
Virulence, Disease and Defense	Resistance to antibiotics and toxic compounds	Beta-lactamase	Probable beta-lactamase ybxI precursor (EC 3.5.2.6)	fig|227866.17.peg.3376
Virulence, Disease and Defense	Resistance to antibiotics and toxic compounds	Multidrug Resistance Efflux Pumps	Transcription regulator of multidrug efflux pump operon, TetR (AcrR) family	fig|227866.17.peg.4218
Virulence, Disease and Defense	Resistance to antibiotics and toxic compounds	Multidrug Resistance Efflux Pumps	Multi antimicrobial extrusion protein (Na(+)/drug antiporter), MATE family of MDR efflux pumps	fig|227866.17.peg.553, fig|227866.17.peg.1605
Virulence, Disease and Defense	Resistance to antibiotics and toxic compounds	Multidrug Resistance Efflux Pumps	Macrolide export ATP-binding/permease protein MacB (EC 3.6.3.-)	fig|227866.17.peg.2701
Virulence, Disease and Defense	Resistance to antibiotics and toxic compounds	Multidrug Resistance Efflux Pumps	Multidrug and toxin extrusion (MATE) family efflux pump YdhE/NorM, homolog	fig|227866.17.peg.1588
Virulence, Disease and Defense	Invasion and intracellular resistance	Mycobacterium virulence operon involved in protein synthesis (SSU ribosomal proteins)	SSU ribosomal protein S7p (S5e)	fig|227866.17.peg.4268
Virulence, Disease and Defense	Invasion and intracellular resistance	Mycobacterium virulence operon involved in protein synthesis (SSU ribosomal proteins)	Translation elongation factor G	fig|227866.17.peg.4269
Virulence, Disease and Defense	Invasion and intracellular resistance	Mycobacterium virulence operon involved in protein synthesis (SSU ribosomal proteins)	Translation elongation factor Tu	fig|227866.17.peg.4270
Virulence, Disease and Defense	Invasion and intracellular resistance	Mycobacterium virulence operon involved in protein synthesis (SSU ribosomal proteins)	SSU ribosomal protein S12p (S23e)	fig|227866.17.peg.4267
Virulence, Disease and Defense	Invasion and intracellular resistance	Mycobacterium virulence operon involved in an unknown function with a Jag Protein and YidC and YidD	RNA-binding protein Jag	fig|227866.17.peg.1869
Virulence, Disease and Defense	Invasion and intracellular resistance	Mycobacterium virulence operon involved in an unknown function with a Jag Protein and YidC and YidD	Protein YidD	fig|227866.17.peg.3806
Virulence, Disease and Defense	Invasion and intracellular resistance	Mycobacterium virulence operon involved in an unknown function with a Jag Protein and YidC and YidD	Inner membrane protein translocase component YidC, short form OxaI-like	fig|227866.17.peg.1868
Virulence, Disease and Defense	Invasion and intracellular resistance	Mycobacterium virulence operon involved in DNA transcription	DNA-directed RNA polymerase beta' subunit (EC 2.7.7.6)	fig|227866.17.peg.4265
Virulence, Disease and Defense	Invasion and intracellular resistance	Mycobacterium virulence operon involved in DNA transcription	DNA-directed RNA polymerase beta subunit (EC 2.7.7.6)	fig|227866.17.peg.4264
Virulence, Disease and Defense	Invasion and intracellular resistance	Mycobacterium virulence operon possibly involved in quinolinate biosynthesis	Quinolinate synthetase (EC 2.5.1.72)	fig|227866.17.peg.3514
Virulence, Disease and Defense	Invasion and intracellular resistance	Mycobacterium virulence operon possibly involved in quinolinate biosynthesis	Quinolinate phosphoribosyltransferase [decarboxylating] (EC 2.4.2.19)	fig|227866.17.peg.3515
Virulence, Disease and Defense	Invasion and intracellular resistance	Mycobacterium virulence operon possibly involved in quinolinate biosynthesis	L-aspartate oxidase (EC 1.4.3.16)	fig|227866.17.peg.3516
Virulence, Disease and Defense	Invasion and intracellular resistance	Mycobacterium virulence operon involved in protein synthesis (LSU ribosomal proteins)	LSU ribosomal protein L35p	fig|227866.17.peg.3626
Virulence, Disease and Defense	Invasion and intracellular resistance	Mycobacterium virulence operon involved in protein synthesis (LSU ribosomal proteins)	Translation initiation factor 3	fig|227866.17.peg.3627
Virulence, Disease and Defense	Invasion and intracellular resistance	Mycobacterium virulence operon involved in protein synthesis (LSU ribosomal proteins)	LSU ribosomal protein L20p	fig|227866.17.peg.1829, fig|227866.17.peg.3625
Potassium metabolism	Potassium metabolism - no subcategory	Potassium homeostasis	Trk system potassium uptake protein TrkA	fig|227866.17.peg.1082, fig|227866.17.peg.2944, fig|227866.17.peg.1082, fig|227866.17.peg.2944
Potassium metabolism	Potassium metabolism - no subcategory	Potassium homeostasis	Potassium efflux system KefA protein	fig|227866.17.peg.1112, fig|227866.17.peg.4056
Potassium metabolism	Potassium metabolism - no subcategory	Potassium homeostasis	Potassium uptake protein TrkH	fig|227866.17.peg.2943, fig|227866.17.peg.2943
Potassium metabolism	Potassium metabolism - no subcategory	Potassium homeostasis	Large-conductance mechanosensitive channel	fig|227866.17.peg.2369
Potassium metabolism	Potassium metabolism - no subcategory	Potassium homeostasis	Glutathione-regulated potassium-efflux system ancillary protein KefF	fig|227866.17.peg.4151
Potassium metabolism	Potassium metabolism - no subcategory	Potassium homeostasis	Osmosensitive K+ channel histidine kinase KdpD (EC 2.7.3.-)	fig|227866.17.peg.357
Potassium metabolism	Potassium metabolism - no subcategory	Hyperosmotic potassium uptake	Potassium uptake protein, integral membrane component, KtrD	fig|227866.17.peg.1194
Potassium metabolism	Potassium metabolism - no subcategory	Hyperosmotic potassium uptake	Trk system potassium uptake protein TrkA	fig|227866.17.peg.1082, fig|227866.17.peg.2944
Potassium metabolism	Potassium metabolism - no subcategory	Hyperosmotic potassium uptake	Potassium uptake protein TrkH	fig|227866.17.peg.2943
Miscellaneous	Plant-Prokaryote DOE project	Iron-sulfur cluster assembly	PaaD-like protein (DUF59) involved in Fe-S cluster assembly	fig|227866.17.peg.1568
Miscellaneous	Plant-Prokaryote DOE project	Iron-sulfur cluster assembly	Iron-sulfur cluster regulator IscR	fig|227866.17.peg.3477
Miscellaneous	Plant-Prokaryote DOE project	Iron-sulfur cluster assembly	Putative iron-sulfur cluster assembly scaffold protein for SUF system, SufE2	fig|227866.17.peg.2772
Miscellaneous	Plant-Prokaryote DOE project	Iron-sulfur cluster assembly	Iron-sulfur cluster assembly protein SufD	fig|227866.17.peg.2770
Miscellaneous	Plant-Prokaryote DOE project	Iron-sulfur cluster assembly	Iron-sulfur cluster assembly ATPase protein SufC	fig|227866.17.peg.2769
Miscellaneous	Plant-Prokaryote DOE project	Iron-sulfur cluster assembly	Scaffold protein for [4Fe-4S] cluster assembly ApbC, MRP-like	fig|227866.17.peg.4311
Miscellaneous	Plant-Prokaryote DOE project	Iron-sulfur cluster assembly	probable iron binding protein from the HesB_IscA_SufA family	fig|227866.17.peg.2828
Miscellaneous	Plant-Prokaryote DOE project	Iron-sulfur cluster assembly	Cysteine desulfurase (EC 2.8.1.7)	fig|227866.17.peg.3314, fig|227866.17.peg.3476, fig|227866.17.peg.3517, fig|227866.17.peg.3693
Miscellaneous	Plant-Prokaryote DOE project	Iron-sulfur cluster assembly	Cysteine desulfurase (EC 2.8.1.7), SufS subfamily	fig|227866.17.peg.2771
Miscellaneous	Plant-Prokaryote DOE project	Iron-sulfur cluster assembly	Iron-sulfur cluster assembly protein SufB	fig|227866.17.peg.2773
Miscellaneous	Plant-Prokaryote DOE project	Scaffold proteins for [4Fe-4S] cluster assembly (MRP family)	Methionyl-tRNA synthetase (EC 6.1.1.10)	fig|227866.17.peg.4366
Miscellaneous	Plant-Prokaryote DOE project	Scaffold proteins for [4Fe-4S] cluster assembly (MRP family)	Scaffold protein for [4Fe-4S] cluster assembly ApbC, MRP-like	fig|227866.17.peg.4311
Miscellaneous	Plant-Prokaryote DOE project	Scaffold proteins for [4Fe-4S] cluster assembly (MRP family)	PaaD-like protein (DUF59) involved in Fe-S cluster assembly	fig|227866.17.peg.1568
Miscellaneous	Plant-Prokaryote DOE project	Scaffold proteins for [4Fe-4S] cluster assembly (MRP family)	Epoxyqueuosine (oQ) reductase QueG	fig|227866.17.peg.1806
Miscellaneous	Plant-Prokaryote DOE project	Scaffold proteins for [4Fe-4S] cluster assembly (MRP family)	S-adenosylmethionine:tRNA ribosyltransferase-isomerase (EC 5.-.-.-)	fig|227866.17.peg.3499
Miscellaneous	Plant-Prokaryote DOE project	Scaffold proteins for [4Fe-4S] cluster assembly (MRP family)	tRNA-guanine transglycosylase (EC 2.4.2.29)	fig|227866.17.peg.3498
Miscellaneous	Plant-Prokaryote DOE project	Scaffold proteins for [4Fe-4S] cluster assembly (MRP family)	TsaE protein, required for threonylcarbamoyladenosine t(6)A37 formation in tRNA	fig|227866.17.peg.3852
Miscellaneous	Plant-Prokaryote DOE project	Niacin-Choline transport and metabolism	Glycine betaine transporter OpuD	fig|227866.17.peg.3743
Miscellaneous	Plant-Prokaryote DOE project	Niacin-Choline transport and metabolism	Nicotinamidase (EC 3.5.1.19)	fig|227866.17.peg.2869, fig|227866.17.peg.4392
Miscellaneous	Plant-Prokaryote DOE project	Niacin-Choline transport and metabolism	Niacin transporter NiaP	fig|227866.17.peg.1888, fig|227866.17.peg.3285
Miscellaneous	Plant-Prokaryote DOE project	Niacin-Choline transport and metabolism	Betaine aldehyde dehydrogenase (EC 1.2.1.8)	fig|227866.17.peg.2947
Miscellaneous	Plant-Prokaryote DOE project	Single-Rhodanese-domain proteins	Rhodanese domain protein UPF0176, Firmicutes subgroup	fig|227866.17.peg.3351
Miscellaneous	Plant-Prokaryote DOE project	Conserved gene cluster possibly involved in RNA metabolism	Cysteinyl-tRNA synthetase (EC 6.1.1.16)	fig|227866.17.peg.4251
Miscellaneous	Plant-Prokaryote DOE project	Conserved gene cluster possibly involved in RNA metabolism	RNA polymerase sporulation specific sigma factor SigH	fig|227866.17.peg.4255
Miscellaneous	Plant-Prokaryote DOE project	Conserved gene cluster possibly involved in RNA metabolism	Serine acetyltransferase (EC 2.3.1.30)	fig|227866.17.peg.4250
Miscellaneous	Plant-Prokaryote DOE project	Conserved gene cluster possibly involved in RNA metabolism	Hypothetical protein DUF901, similar to C-terminal domain of ribosome protection-type Tc-resistance proteins	fig|227866.17.peg.4254
Miscellaneous	Plant-Prokaryote DOE project	Conserved gene cluster possibly involved in RNA metabolism	COG1939: Ribonuclease III family protein	fig|227866.17.peg.4252
Miscellaneous	Miscellaneous - no subcategory	Phosphoglycerate mutase protein family	Carboxyl-terminal protease (EC 3.4.21.102)	fig|227866.17.peg.536, fig|227866.17.peg.2491
Miscellaneous	Miscellaneous - no subcategory	Phosphoglycerate mutase protein family	2,3-bisphosphoglycerate-independent phosphoglycerate mutase (EC 5.4.2.1)	fig|227866.17.peg.2626
Miscellaneous	Miscellaneous - no subcategory	Phosphoglycerate mutase protein family	Predicted broad substrate specificity phosphatase	fig|227866.17.peg.1656
Miscellaneous	Miscellaneous - no subcategory	Muconate lactonizing enzyme family	L-alanine-DL-glutamate epimerase	fig|227866.17.peg.1250
Miscellaneous	Miscellaneous - no subcategory	Muconate lactonizing enzyme family	O-succinylbenzoate synthase (EC 4.2.1.113)	fig|227866.17.peg.3816
Miscellaneous	Miscellaneous - no subcategory	Aromatic dioxygenase mess	Quercetin 2,3-dioxygenase (EC 1.13.11.24)	fig|227866.17.peg.1972
Miscellaneous	Miscellaneous - no subcategory	Aromatic dioxygenase mess	Cysteine dioxygenase (EC 1.13.11.20)	fig|227866.17.peg.2938
Miscellaneous	Miscellaneous - no subcategory	Bacillus subtilis scratch - gjo	Ku domain protein	fig|227866.17.peg.1204
Miscellaneous	Miscellaneous - no subcategory	Bacillus subtilis scratch - gjo	Cell division topological determinant MinJ	fig|227866.17.peg.2493
Miscellaneous	Miscellaneous - no subcategory	Bacillus subtilis scratch - gjo	ATP-dependent DNA ligase (EC 6.5.1.1) clustered with Ku protein, LigD	fig|227866.17.peg.1205, fig|227866.17.peg.1388
Miscellaneous	Miscellaneous - no subcategory	Dioxygenases (EC 1.13.11.-)	Quercetin 2,3-dioxygenase (EC 1.13.11.24)	fig|227866.17.peg.1972
Miscellaneous	Miscellaneous - no subcategory	Dioxygenases (EC 1.13.11.-)	Cysteine dioxygenase (EC 1.13.11.20)	fig|227866.17.peg.2938
Miscellaneous	Miscellaneous - no subcategory	Broadly distributed proteins not in subsystems	YbbM seven transmembrane helix protein	fig|227866.17.peg.1336
Miscellaneous	Miscellaneous - no subcategory	Broadly distributed proteins not in subsystems	YbbL ABC transporter ATP-binding protein	fig|227866.17.peg.1335
Miscellaneous	Miscellaneous - no subcategory	Broadly distributed proteins not in subsystems	Putative oxidoreductase YncB	fig|227866.17.peg.4008
Miscellaneous	Miscellaneous - no subcategory	Broadly distributed proteins not in subsystems	FIG001943: hypothetical protein YajQ	fig|227866.17.peg.1584
Phages, Prophages, Transposable elements, Plasmids	Phages, Prophages	Phage tail proteins	Phage tail length tape-measure protein	fig|227866.17.peg.1283
Phages, Prophages, Transposable elements, Plasmids	Phages, Prophages	Phage baseplate proteins	Phage baseplate	fig|227866.17.peg.1278
Phages, Prophages, Transposable elements, Plasmids	Phages, Prophages	Phage tail proteins 2	Phage tail length tape-measure protein	fig|227866.17.peg.1283
Phages, Prophages, Transposable elements, Plasmids	Phages, Prophages	Phage tail fiber proteins	Phage tail fiber protein	fig|227866.17.peg.1848
Phages, Prophages, Transposable elements, Plasmids	Phages, Prophages	Phage tail fiber proteins	Phage tail fibers	fig|227866.17.peg.1286
Phages, Prophages, Transposable elements, Plasmids	Pathogenicity islands	Listeria Pathogenicity Island LIPI-1 extended	Zinc metalloproteinase precursor (EC 3.4.24.29)	fig|227866.17.peg.1058, fig|227866.17.peg.1575
Membrane Transport	ABC transporters	ABC transporter alkylphosphonate (TC 3.A.1.9.1)	Phosphonate ABC transporter phosphate-binding periplasmic component (TC 3.A.1.9.1)	fig|227866.17.peg.1048, fig|227866.17.peg.1074, fig|227866.17.peg.2811
Membrane Transport	ABC transporters	ABC transporter oligopeptide (TC 3.A.1.5.1)	Oligopeptide transport system permease protein OppC (TC 3.A.1.5.1)	fig|227866.17.peg.1537, fig|227866.17.peg.1542
Membrane Transport	ABC transporters	ABC transporter oligopeptide (TC 3.A.1.5.1)	Oligopeptide transport system permease protein OppB (TC 3.A.1.5.1)	fig|227866.17.peg.1536, fig|227866.17.peg.1538, fig|227866.17.peg.1543
Membrane Transport	ABC transporters	ABC transporter oligopeptide (TC 3.A.1.5.1)	Oligopeptide transport ATP-binding protein OppF (TC 3.A.1.5.1)	fig|227866.17.peg.1248, fig|227866.17.peg.1535, fig|227866.17.peg.1545
Membrane Transport	ABC transporters	ABC transporter oligopeptide (TC 3.A.1.5.1)	Oligopeptide transport ATP-binding protein OppD (TC 3.A.1.5.1)	fig|227866.17.peg.1546
Membrane Transport	ABC transporters	ABC transporter oligopeptide (TC 3.A.1.5.1)	Oligopeptide ABC transporter, periplasmic oligopeptide-binding protein OppA (TC 3.A.1.5.1)	fig|227866.17.peg.1539, fig|227866.17.peg.1544, fig|227866.17.peg.1629
Membrane Transport	ABC transporters	ABC transporter dipeptide (TC 3.A.1.5.2)	Dipeptide transport system permease protein DppB (TC 3.A.1.5.2)	fig|227866.17.peg.1255
Membrane Transport	ABC transporters	ABC transporter dipeptide (TC 3.A.1.5.2)	Dipeptide transport ATP-binding protein DppD (TC 3.A.1.5.2)	fig|227866.17.peg.1253
Membrane Transport	ABC transporters	ABC transporter dipeptide (TC 3.A.1.5.2)	Dipeptide transport system permease protein DppC (TC 3.A.1.5.2)	fig|227866.17.peg.1254
Membrane Transport	ABC transporters	ABC transporter dipeptide (TC 3.A.1.5.2)	Dipeptide-binding ABC transporter, periplasmic substrate-binding component (TC 3.A.1.5.2)	fig|227866.17.peg.1252
Membrane Transport	Protein translocation across cytoplasmic membrane	Bacterial signal recognition particle (SRP)	Signal recognition particle, subunit Ffh SRP54 (TC 3.A.5.1.1)	fig|227866.17.peg.925
Membrane Transport	Protein translocation across cytoplasmic membrane	Bacterial signal recognition particle (SRP)	Signal recognition particle associated protein	fig|227866.17.peg.926
Membrane Transport	Protein translocation across cytoplasmic membrane	Bacterial signal recognition particle (SRP)	Signal recognition particle receptor protein FtsY (=alpha subunit) (TC 3.A.5.1.1)	fig|227866.17.peg.928
Membrane Transport	Protein translocation across cytoplasmic membrane	EcsAB transporter affecting expression and secretion of secretory preproteins	EcsC protein	fig|227866.17.peg.1687
Membrane Transport	Protein translocation across cytoplasmic membrane	EcsAB transporter affecting expression and secretion of secretory preproteins	ABC transporter, ATP-binding protein EcsA	fig|227866.17.peg.1689, fig|227866.17.peg.3738
Membrane Transport	Protein translocation across cytoplasmic membrane	EcsAB transporter affecting expression and secretion of secretory preproteins	Protease production regulatory protein Hpr (ScoC)	fig|227866.17.peg.1695
Membrane Transport	Protein translocation across cytoplasmic membrane	EcsAB transporter affecting expression and secretion of secretory preproteins	Hypothetical protein SAV1839	fig|227866.17.peg.1694
Membrane Transport	Protein translocation across cytoplasmic membrane	EcsAB transporter affecting expression and secretion of secretory preproteins	Foldase protein PrsA precursor (EC 5.2.1.8)	fig|227866.17.peg.1699, fig|227866.17.peg.4331
Membrane Transport	Protein translocation across cytoplasmic membrane	EcsAB transporter affecting expression and secretion of secretory preproteins	ABC transporter, permease protein EscB	fig|227866.17.peg.1688
Membrane Transport	Protein translocation across cytoplasmic membrane	Twin-arginine translocation system	Twin-arginine translocation protein TatC	fig|227866.17.peg.3316, fig|227866.17.peg.3436, fig|227866.17.peg.3860
Membrane Transport	Protein translocation across cytoplasmic membrane	Twin-arginine translocation system	Twin-arginine translocation protein TatAd	fig|227866.17.peg.744, fig|227866.17.peg.3317
Membrane Transport	Protein translocation across cytoplasmic membrane	Twin-arginine translocation system	Twin-arginine translocation protein TatA	fig|227866.17.peg.3859
Membrane Transport	Cation transporters	Magnesium transport	Mg(2+) transport ATPase protein C	fig|227866.17.peg.3925
Membrane Transport	Cation transporters	Magnesium transport	Magnesium and cobalt transport protein CorA	fig|227866.17.peg.183, fig|227866.17.peg.4061
Membrane Transport	Cation transporters	Magnesium transport	Magnesium and cobalt efflux protein CorC	fig|227866.17.peg.182, fig|227866.17.peg.1735, fig|227866.17.peg.1738, fig|227866.17.peg.2918, fig|227866.17.peg.4164
Membrane Transport	Cation transporters	Magnesium transport	Mg/Co/Ni transporter MgtE	fig|227866.17.peg.1215
Membrane Transport	Cation transporters	Copper Transport System	Copper(I) chaperone CopZ	fig|227866.17.peg.2673
Membrane Transport	Cation transporters	Copper Transport System	Conserved membrane protein in copper uptake, YcnI	fig|227866.17.peg.3178
Membrane Transport	Cation transporters	Copper Transport System	Reductase or disulfide isomerase in copper uptake, YcnL	fig|227866.17.peg.3175
Membrane Transport	Cation transporters	Copper Transport System	Copper-translocating P-type ATPase (EC 3.6.3.4)	fig|227866.17.peg.1152, fig|227866.17.peg.2674, fig|227866.17.peg.2675
Membrane Transport	Cation transporters	Copper Transport System	Repressor CsoR of the copZA operon	fig|227866.17.peg.2672
Membrane Transport	Cation transporters	Copper transport and blue copper proteins	Copper binding protein, plastocyanin/azurin family	fig|227866.17.peg.993
Membrane Transport	Uni- Sym- and Antiporters	Proton-dependent Peptide Transporters	Di-/tripeptide transporter	fig|227866.17.peg.3208
Membrane Transport	Uni- Sym- and Antiporters	Multi-subunit cation antiporter	Na(+) H(+) antiporter subunit F	fig|227866.17.peg.2880
Membrane Transport	Uni- Sym- and Antiporters	Multi-subunit cation antiporter	Na(+) H(+) antiporter subunit E	fig|227866.17.peg.2881
Membrane Transport	Uni- Sym- and Antiporters	Multi-subunit cation antiporter	Na(+) H(+) antiporter subunit B	fig|227866.17.peg.2884
Membrane Transport	Uni- Sym- and Antiporters	Multi-subunit cation antiporter	Na(+) H(+) antiporter subunit A	fig|227866.17.peg.2885
Membrane Transport	Uni- Sym- and Antiporters	Multi-subunit cation antiporter	Na(+) H(+) antiporter subunit C	fig|227866.17.peg.2883
Membrane Transport	Uni- Sym- and Antiporters	Multi-subunit cation antiporter	Na(+) H(+) antiporter subunit D	fig|227866.17.peg.2882
Membrane Transport	Uni- Sym- and Antiporters	Multi-subunit cation antiporter	Na(+) H(+) antiporter subunit G	fig|227866.17.peg.2879
Membrane Transport	Uni- Sym- and Antiporters	NhaA, NhaD and Sodium-dependent phosphate transporters	Sodium-dependent phosphate transporter	fig|227866.17.peg.112
Membrane Transport	Membrane Transport - no subcategory	ECF class transporters	Substrate-specific component RibU of riboflavin ECF transporter	fig|227866.17.peg.363
Membrane Transport	Membrane Transport - no subcategory	ECF class transporters	Transmembrane component YkoC of energizing module of thiamin-regulated ECF transporter for HydroxyMethylPyrimidine	fig|227866.17.peg.1224
Membrane Transport	Membrane Transport - no subcategory	ECF class transporters	Substrate-specific component BioY of biotin ECF transporter	fig|227866.17.peg.1653, fig|227866.17.peg.2841
Membrane Transport	Membrane Transport - no subcategory	ECF class transporters	Substrate-specific component ThiT of thiamin ECF transporter	fig|227866.17.peg.2954
Membrane Transport	Membrane Transport - no subcategory	ECF class transporters	Substrate-specific component YkoE of thiamin-regulated ECF transporter for HydroxyMethylPyrimidine	fig|227866.17.peg.1222
Membrane Transport	Membrane Transport - no subcategory	ECF class transporters	Transmembrane component of general energizing module of ECF transporters	fig|227866.17.peg.4304
Membrane Transport	Membrane Transport - no subcategory	ECF class transporters	ATPase component of general energizing module of ECF transporters	fig|227866.17.peg.4302, fig|227866.17.peg.4303
Membrane Transport	Membrane Transport - no subcategory	ECF class transporters	Duplicated ATPase component YkoD of energizing module of thiamin-regulated ECF transporter for HydroxyMethylPyrimidine	fig|227866.17.peg.1223
Membrane Transport	Membrane Transport - no subcategory	ECF class transporters	Substrate-specific component TrpP of tryptophan ECF transporter	fig|227866.17.peg.1692
Membrane Transport	TRAP transporters	TRAP Transporter collection	TRAP-type C4-dicarboxylate transport system, periplasmic component	fig|227866.17.peg.3124
Iron acquisition and metabolism	Siderophores	Bacillibactin Siderophore	Trilactone hydrolase [bacillibactin] siderophore	fig|227866.17.peg.2843
Iron acquisition and metabolism	Siderophores	Bacillibactin Siderophore	Fe-bacillibactin uptake system FeuB	fig|227866.17.peg.3413
Iron acquisition and metabolism	Siderophores	Bacillibactin Siderophore	Isochorismatase (EC 3.3.2.1) [bacillibactin] siderophore	fig|227866.17.peg.2847
Iron acquisition and metabolism	Siderophores	Bacillibactin Siderophore	Fe-bacillibactin uptake system FeuA, Fe-bacillibactin binding	fig|227866.17.peg.3412
Iron acquisition and metabolism	Siderophores	Bacillibactin Siderophore	2,3-dihydroxybenzoate-AMP ligase (EC 2.7.7.58) [bacillibactin] siderophore	fig|227866.17.peg.2846
Iron acquisition and metabolism	Siderophores	Bacillibactin Siderophore	Fe-bacillibactin uptake system FeuC	fig|227866.17.peg.3414
Iron acquisition and metabolism	Siderophores	Bacillibactin Siderophore	Bacillibactin synthetase component F (EC 2.7.7.-)	fig|227866.17.peg.2848
Iron acquisition and metabolism	Siderophores	Bacillibactin Siderophore	2,3-dihydro-2,3-dihydroxybenzoate dehydrogenase (EC 1.3.1.28) [bacillibactin] siderophore	fig|227866.17.peg.2844
Iron acquisition and metabolism	Siderophores	Siderophore Anthrachelin	Uncharacterized iron compound ABC uptake transporter, permease protein	fig|227866.17.peg.3191, fig|227866.17.peg.3192
Iron acquisition and metabolism	Siderophores	Siderophore Anthrachelin	Antibiotic biosynthesis monooxygenase domain-containing protein	fig|227866.17.peg.3972
Iron acquisition and metabolism	Siderophores	Siderophore Anthrachelin	Uncharacterized iron compound ABC uptake transporter, substrate-binding protein	fig|227866.17.peg.3189
Iron acquisition and metabolism	Siderophores	Siderophore Anthrachelin	Uncharacterized iron compound ABC uptake transporter, ATP-binding protein	fig|227866.17.peg.3190
Iron acquisition and metabolism	Iron acquisition and metabolism - no subcategory	Heme, hemin uptake and utilization systems in GramPositives	Antibiotic biosynthesis monooxygenase domain-containing protein	fig|227866.17.peg.3972
Iron acquisition and metabolism	Iron acquisition and metabolism - no subcategory	Heme, hemin uptake and utilization systems in GramPositives	Uncharacterized iron compound ABC uptake transporter, substrate-binding protein	fig|227866.17.peg.3189
Iron acquisition and metabolism	Iron acquisition and metabolism - no subcategory	Heme, hemin uptake and utilization systems in GramPositives	Uncharacterized iron compound ABC uptake transporter, ATP-binding protein	fig|227866.17.peg.3190
Iron acquisition and metabolism	Iron acquisition and metabolism - no subcategory	Heme, hemin uptake and utilization systems in GramPositives	Sortase A, LPXTG specific	fig|227866.17.peg.2373
Iron acquisition and metabolism	Iron acquisition and metabolism - no subcategory	Heme, hemin uptake and utilization systems in GramPositives	Heme ABC type transporter HtsABC, permease protein HtsB	fig|227866.17.peg.4012
Iron acquisition and metabolism	Iron acquisition and metabolism - no subcategory	Heme, hemin uptake and utilization systems in GramPositives	Heme ABC type transporter HtsABC, heme-binding protein	fig|227866.17.peg.1657, fig|227866.17.peg.4013
Iron acquisition and metabolism	Iron acquisition and metabolism - no subcategory	Heme, hemin uptake and utilization systems in GramPositives	Two-component sensor kinase SA14-24	fig|227866.17.peg.1925
Iron acquisition and metabolism	Iron acquisition and metabolism - no subcategory	Heme, hemin uptake and utilization systems in GramPositives	Heme ABC type transporter HtsABC, permease protein HtsC	fig|227866.17.peg.4011
Iron acquisition and metabolism	Iron acquisition and metabolism - no subcategory	Heme, hemin uptake and utilization systems in GramPositives	Uncharacterized iron compound ABC uptake transporter, permease protein	fig|227866.17.peg.3191, fig|227866.17.peg.3192
Iron acquisition and metabolism	Iron acquisition and metabolism - no subcategory	Heme, hemin uptake and utilization systems in GramPositives	Two-component response regulator SA14-24	fig|227866.17.peg.1924
Iron acquisition and metabolism	Iron acquisition and metabolism - no subcategory	Ferrous iron transporter EfeUOB, low-pH-induced	Ferrous iron transport peroxidase EfeB	fig|227866.17.peg.2163
Iron acquisition and metabolism	Iron acquisition and metabolism - no subcategory	Ferrous iron transporter EfeUOB, low-pH-induced	Ferrous iron transport permease EfeU	fig|227866.17.peg.2161
Iron acquisition and metabolism	Iron acquisition and metabolism - no subcategory	Ferrous iron transporter EfeUOB, low-pH-induced	Ferrous iron transport periplasmic protein EfeO, contains peptidase-M75 domain and (frequently) cupredoxin-like domain	fig|227866.17.peg.2162
RNA Metabolism	RNA processing and modification	RNA pseudouridine syntheses	Similar to ribosomal large subunit pseudouridine synthase D, Bacillus subtilis YhcT type	fig|227866.17.peg.1774
RNA Metabolism	RNA processing and modification	RNA pseudouridine syntheses	Similar to ribosomal large subunit pseudouridine synthase D, Bacillus subtilis YjbO type	fig|227866.17.peg.1518
RNA Metabolism	RNA processing and modification	RNA pseudouridine syntheses	Ribosomal small subunit pseudouridine synthase A (EC 4.2.1.70)	fig|227866.17.peg.3740
RNA Metabolism	RNA processing and modification	RNA pseudouridine syntheses	Ribosomal large subunit pseudouridine synthase D (EC 4.2.1.70)	fig|227866.17.peg.976
RNA Metabolism	RNA processing and modification	RNA pseudouridine syntheses	Ribosomal large subunit pseudouridine synthase B (EC 4.2.1.70)	fig|227866.17.peg.352
RNA Metabolism	RNA processing and modification	RNA pseudouridine syntheses	tRNA pseudouridine synthase B (EC 4.2.1.70)	fig|227866.17.peg.856
RNA Metabolism	RNA processing and modification	RNA pseudouridine syntheses	tRNA pseudouridine synthase A (EC 4.2.1.70)	fig|227866.17.peg.4305
RNA Metabolism	RNA processing and modification	tRNA nucleotidyltransferase	tRNA nucleotidyltransferase (EC 2.7.7.21) (EC 2.7.7.25)	fig|227866.17.peg.427
RNA Metabolism	RNA processing and modification	Methylthiotransferases	tRNA-t(6)A37 methylthiotransferase	fig|227866.17.peg.111
RNA Metabolism	RNA processing and modification	Methylthiotransferases	tRNA-i(6)A37 methylthiotransferase	fig|227866.17.peg.822
RNA Metabolism	RNA processing and modification	Ribonucleases in Bacillus	Ribonuclease J1 (endonuclease and 5' exonuclease)	fig|227866.17.peg.1080
RNA Metabolism	RNA processing and modification	Ribonucleases in Bacillus	Ribonuclease HII (EC 3.1.26.4)	fig|227866.17.peg.917
RNA Metabolism	RNA processing and modification	Ribonucleases in Bacillus	Ribonuclease J2 (endoribonuclease in RNA processing)	fig|227866.17.peg.844
RNA Metabolism	RNA processing and modification	Ribonucleases in Bacillus	Ribonuclease HIII (EC 3.1.26.4)	fig|227866.17.peg.3600
RNA Metabolism	RNA processing and modification	Ribonucleases in Bacillus	5' exoribonuclease Bsu YhaM&subsystem_name=Ribonucleases_in_Bacillus'>3'->5' exoribonuclease Bsu YhaM	fig|227866.17.peg.1701
RNA Metabolism	RNA processing and modification	Ribonucleases in Bacillus	Extracellular ribonuclease Bsn	fig|227866.17.peg.2787
RNA Metabolism	RNA processing and modification	RNA processing and degradation, bacterial	3'-to-5' exoribonuclease RNase R	fig|227866.17.peg.2660
RNA Metabolism	RNA processing and modification	RNA processing and degradation, bacterial	FIG146085: 3'-to-5' oligoribonuclease A, Bacillus type	fig|227866.17.peg.3669
RNA Metabolism	RNA processing and modification	RNA processing and degradation, bacterial	3'-to-5' oligoribonuclease B, Bacillus type	fig|227866.17.peg.686
RNA Metabolism	RNA processing and modification	RNA processing and degradation, bacterial	Ribonuclease III (EC 3.1.26.3)	fig|227866.17.peg.930
RNA Metabolism	RNA processing and modification	RNA methylation	FIG011178: rRNA methylase	fig|227866.17.peg.3604
RNA Metabolism	RNA processing and modification	RNA methylation	tRNA (adenine37-N(6))-methyltransferase TrmN6 (EC 2.1.1.223)	fig|227866.17.peg.4370
RNA Metabolism	RNA processing and modification	RNA methylation	Ribosomal RNA large subunit methyltransferase A (EC 2.1.1.51)	fig|227866.17.peg.2074
RNA Metabolism	RNA processing and modification	RNA methylation	Ribosomal RNA small subunit methyltransferase E (EC 2.1.1.-)	fig|227866.17.peg.110
RNA Metabolism	RNA processing and modification	RNA methylation	LSU m5C1962 methyltransferase RlmI	fig|227866.17.peg.2153
RNA Metabolism	RNA processing and modification	RNA methylation	SSU rRNA (adenine(1518)-N(6)/adenine(1519)-N(6))-dimethyltransferase (EC 2.1.1.182)	fig|227866.17.peg.4362
RNA Metabolism	RNA processing and modification	RNA methylation	23S rRNA (guanosine-2'-O-) -methyltransferase rlmB (EC 2.1.1.-)	fig|227866.17.peg.4253
RNA Metabolism	RNA processing and modification	RNA methylation	tRNA (guanine46-N7-)-methyltransferase (EC 2.1.1.33)	fig|227866.17.peg.3727
RNA Metabolism	RNA processing and modification	RNA methylation	Ribosomal RNA large subunit methyltransferase N (EC 2.1.1.-)	fig|227866.17.peg.947
RNA Metabolism	RNA processing and modification	RNA methylation	tRNA (Guanine37-N1) -methyltransferase (EC 2.1.1.31)	fig|227866.17.peg.920
RNA Metabolism	RNA processing and modification	RNA methylation	tRNA (cytidine(34)-2'-O)-methyltransferase (EC 2.1.1.207)	fig|227866.17.peg.1804
RNA Metabolism	RNA processing and modification	RNA methylation	rRNA small subunit 7-methylguanosine (m7G) methyltransferase GidB	fig|227866.17.peg.1872
RNA Metabolism	RNA processing and modification	RNA methylation	LSU m3Psi1915 methyltransferase RlmH	fig|227866.17.peg.1945
RNA Metabolism	RNA processing and modification	RNA methylation	tRNA-specific 2-thiouridylase MnmA	fig|227866.17.peg.3475
RNA Metabolism	RNA processing and modification	RNA methylation	Ribosomal RNA small subunit methyltransferase C (EC 2.1.1.52)	fig|227866.17.peg.4263
RNA Metabolism	RNA processing and modification	16S rRNA modification within P site of ribosome	Penicillin-binding protein 3	fig|227866.17.peg.3155
RNA Metabolism	RNA processing and modification	16S rRNA modification within P site of ribosome	Stage V sporulation protein D (Sporulation-specific penicillin-binding protein)	fig|227866.17.peg.1006
RNA Metabolism	RNA processing and modification	16S rRNA modification within P site of ribosome	Cell division protein FtsI [Peptidoglycan synthetase] (EC 2.4.1.129)	fig|227866.17.peg.155, fig|227866.17.peg.1006, fig|227866.17.peg.1135, fig|227866.17.peg.3454
RNA Metabolism	RNA processing and modification	16S rRNA modification within P site of ribosome	Uncharacterized N-acetyltransferase BT9727_3663 (EC 2.3.1.-)	fig|227866.17.peg.1013
RNA Metabolism	RNA processing and modification	16S rRNA modification within P site of ribosome	BH2577 unknown conserved protein in B. subtilis	fig|227866.17.peg.1011
RNA Metabolism	RNA processing and modification	16S rRNA modification within P site of ribosome	Cell division protein FtsL	fig|227866.17.peg.1008
RNA Metabolism	RNA processing and modification	16S rRNA modification within P site of ribosome	Penicillin-binding protein 2B	fig|227866.17.peg.1007
RNA Metabolism	RNA processing and modification	16S rRNA modification within P site of ribosome	Cell division protein MraZ	fig|227866.17.peg.1010
RNA Metabolism	RNA processing and modification	16S rRNA modification within P site of ribosome	rRNA small subunit methyltransferase H	fig|227866.17.peg.1009
RNA Metabolism	RNA processing and modification	16S rRNA modification within P site of ribosome	rRNA small subunit methyltransferase I	fig|227866.17.peg.4368
RNA Metabolism	RNA processing and modification	tRNA modification Bacteria	S-adenosylmethionine:tRNA ribosyltransferase-isomerase (EC 5.-.-.-)	fig|227866.17.peg.3499
RNA Metabolism	RNA processing and modification	tRNA modification Bacteria	tRNA(Ile)-lysidine synthetase (EC 6.3.4.19)	fig|227866.17.peg.4336
RNA Metabolism	RNA processing and modification	tRNA modification Bacteria	Iron-sulfur cluster assembly ATPase protein SufC	fig|227866.17.peg.2769
RNA Metabolism	RNA processing and modification	tRNA modification Bacteria	tRNA:m(5)U-54 MTase gid	fig|227866.17.peg.910
RNA Metabolism	RNA processing and modification	tRNA modification Bacteria	tRNA (guanine46-N7-)-methyltransferase (EC 2.1.1.33)	fig|227866.17.peg.3727
RNA Metabolism	RNA processing and modification	tRNA modification Bacteria	tRNA-specific adenosine-34 deaminase (EC 3.5.4.-)	fig|227866.17.peg.4391
RNA Metabolism	RNA processing and modification	tRNA modification Bacteria	Queuosine Biosynthesis QueC ATPase	fig|227866.17.peg.1169
RNA Metabolism	RNA processing and modification	tRNA modification Bacteria	GTP cyclohydrolase I (EC 3.5.4.16) type 1	fig|227866.17.peg.393
RNA Metabolism	RNA processing and modification	tRNA modification Bacteria	Cysteine desulfurase (EC 2.8.1.7)	fig|227866.17.peg.3314, fig|227866.17.peg.3476, fig|227866.17.peg.3517, fig|227866.17.peg.3693
RNA Metabolism	RNA processing and modification	tRNA modification Bacteria	FIG004453: protein YceG like	fig|227866.17.peg.3460
RNA Metabolism	RNA processing and modification	tRNA modification Bacteria	Putative tRNA-m1A22 methylase	fig|227866.17.peg.138
RNA Metabolism	RNA processing and modification	tRNA modification Bacteria	LSU m3Psi1915 methyltransferase RlmH	fig|227866.17.peg.1945
RNA Metabolism	RNA processing and modification	tRNA modification Bacteria	tRNA-guanine transglycosylase (EC 2.4.2.29)	fig|227866.17.peg.3498
RNA Metabolism	RNA processing and modification	tRNA modification Bacteria	Queuosine Biosynthesis QueE Radical SAM	fig|227866.17.peg.1167
RNA Metabolism	RNA processing and modification	tRNA modification Bacteria	Queuosine biosynthesis QueD, PTPS-I	fig|227866.17.peg.1168
RNA Metabolism	RNA processing and modification	tRNA modification Bacteria	tRNA S(4)U 4-thiouridine synthase (former ThiI)	fig|227866.17.peg.3692
RNA Metabolism	RNA processing and modification	tRNA modification Bacteria	tRNA-i(6)A37 methylthiotransferase	fig|227866.17.peg.822
RNA Metabolism	RNA processing and modification	tRNA modification Bacteria	tRNA uridine 5-carboxymethylaminomethyl modification enzyme GidA	fig|227866.17.peg.1871
RNA Metabolism	RNA processing and modification	tRNA modification Bacteria	RNA binding methyltransferase FtsJ like	fig|227866.17.peg.234
RNA Metabolism	RNA processing and modification	tRNA modification Bacteria	tRNA pseudouridine synthase B (EC 4.2.1.70)	fig|227866.17.peg.856
RNA Metabolism	RNA processing and modification	tRNA modification Bacteria	Iron-sulfur cluster assembly protein SufD	fig|227866.17.peg.2770
RNA Metabolism	RNA processing and modification	tRNA modification Bacteria	GTPase and tRNA-U34 5-formylation enzyme TrmE	fig|227866.17.peg.1870
RNA Metabolism	RNA processing and modification	tRNA modification Bacteria	tRNA (Guanine37-N1) -methyltransferase (EC 2.1.1.31)	fig|227866.17.peg.920
RNA Metabolism	RNA processing and modification	tRNA modification Bacteria	tRNA dihydrouridine synthase B (EC 1.-.-.-)	fig|227866.17.peg.4065, fig|227866.17.peg.4322
RNA Metabolism	RNA processing and modification	tRNA modification Bacteria	Cytidine deaminase (EC 3.5.4.5)	fig|227866.17.peg.125
RNA Metabolism	RNA processing and modification	tRNA modification Bacteria	tRNA dimethylallyltransferase (EC 2.5.1.75)	fig|227866.17.peg.787
RNA Metabolism	RNA processing and modification	tRNA modification Bacteria	Cysteine desulfurase (EC 2.8.1.7), SufS subfamily	fig|227866.17.peg.2771
RNA Metabolism	RNA processing and modification	tRNA modification Bacteria	Iron-sulfur cluster assembly protein SufB	fig|227866.17.peg.2773
RNA Metabolism	RNA processing and modification	tRNA modification Bacteria	tRNA pseudouridine synthase A (EC 4.2.1.70)	fig|227866.17.peg.4305
RNA Metabolism	RNA processing and modification	mnm5U34 biosynthesis bacteria	GTPase and tRNA-U34 5-formylation enzyme TrmE	fig|227866.17.peg.1870
RNA Metabolism	RNA processing and modification	mnm5U34 biosynthesis bacteria	tRNA uridine 5-carboxymethylaminomethyl modification enzyme GidA	fig|227866.17.peg.1871
RNA Metabolism	RNA processing and modification	mnm5U34 biosynthesis bacteria	Cysteine desulfurase (EC 2.8.1.7)	fig|227866.17.peg.3314, fig|227866.17.peg.3476, fig|227866.17.peg.3517, fig|227866.17.peg.3693
RNA Metabolism	RNA processing and modification	mnm5U34 biosynthesis bacteria	Cysteine desulfurase (EC 2.8.1.7), SufS subfamily	fig|227866.17.peg.2771
RNA Metabolism	RNA processing and modification	Queuosine-Archaeosine Biosynthesis	Queuosine biosynthesis QueD, PTPS-I	fig|227866.17.peg.1168
RNA Metabolism	RNA processing and modification	Queuosine-Archaeosine Biosynthesis	Queuosine Biosynthesis QueE Radical SAM	fig|227866.17.peg.1167
RNA Metabolism	RNA processing and modification	Queuosine-Archaeosine Biosynthesis	Peptidyl-prolyl cis-trans isomerase (EC 5.2.1.8)	fig|227866.17.peg.335
RNA Metabolism	RNA processing and modification	Queuosine-Archaeosine Biosynthesis	Hydrolase (HAD superfamily) in cluster with DUF1447	fig|227866.17.peg.1077
RNA Metabolism	RNA processing and modification	Queuosine-Archaeosine Biosynthesis	Putative preQ0 transporter	fig|227866.17.peg.476
RNA Metabolism	RNA processing and modification	Queuosine-Archaeosine Biosynthesis	GTP cyclohydrolase I (EC 3.5.4.16) type 2	fig|227866.17.peg.3245
RNA Metabolism	RNA processing and modification	Queuosine-Archaeosine Biosynthesis	S-adenosylmethionine:tRNA ribosyltransferase-isomerase (EC 5.-.-.-)	fig|227866.17.peg.3499
RNA Metabolism	RNA processing and modification	Queuosine-Archaeosine Biosynthesis	Permease of the drug/metabolite transporter (DMT) superfamily	fig|227866.17.peg.620, fig|227866.17.peg.1891, fig|227866.17.peg.2048, fig|227866.17.peg.2232, fig|227866.17.peg.2233, fig|227866.17.peg.2617, fig|227866.17.peg.3050, fig|227866.17.peg.3066, fig|227866.17.peg.3074, fig|227866.17.peg.3076, fig|227866.17.peg.3223, fig|227866.17.peg.3365
RNA Metabolism	RNA processing and modification	Queuosine-Archaeosine Biosynthesis	Epoxyqueuosine (oQ) reductase QueG	fig|227866.17.peg.1806
RNA Metabolism	RNA processing and modification	Queuosine-Archaeosine Biosynthesis	GTP cyclohydrolase I (EC 3.5.4.16) type 1	fig|227866.17.peg.393
RNA Metabolism	RNA processing and modification	Queuosine-Archaeosine Biosynthesis	Queuosine Biosynthesis QueC ATPase	fig|227866.17.peg.1169
RNA Metabolism	RNA processing and modification	Queuosine-Archaeosine Biosynthesis	tRNA-guanine transglycosylase (EC 2.4.2.29)	fig|227866.17.peg.3498
RNA Metabolism	RNA processing and modification	Ribonuclease H	Ribonuclease HI, Bacillus nonfunctional homolog	fig|227866.17.peg.475
RNA Metabolism	RNA processing and modification	Ribonuclease H	Ribonuclease HII (EC 3.1.26.4)	fig|227866.17.peg.917
RNA Metabolism	RNA processing and modification	Ribonuclease H	Ribonuclease HIII (EC 3.1.26.4)	fig|227866.17.peg.3600
RNA Metabolism	RNA processing and modification	tRNA processing	Ribonuclease P protein component (EC 3.1.26.5)	fig|227866.17.peg.1867
RNA Metabolism	RNA processing and modification	tRNA processing	tRNA-i(6)A37 methylthiotransferase	fig|227866.17.peg.822
RNA Metabolism	RNA processing and modification	tRNA processing	tRNA(Ile)-lysidine synthetase (EC 6.3.4.19)	fig|227866.17.peg.4336
RNA Metabolism	RNA processing and modification	tRNA processing	tRNA pseudouridine synthase B (EC 4.2.1.70)	fig|227866.17.peg.856
RNA Metabolism	RNA processing and modification	tRNA processing	Ribonuclease Z (EC 3.1.26.11)	fig|227866.17.peg.280
RNA Metabolism	RNA processing and modification	tRNA processing	tRNA-specific adenosine-34 deaminase (EC 3.5.4.-)	fig|227866.17.peg.4391
RNA Metabolism	RNA processing and modification	tRNA processing	tRNA dimethylallyltransferase (EC 2.5.1.75)	fig|227866.17.peg.787
RNA Metabolism	RNA processing and modification	tRNA processing	Ribonuclease PH (EC 2.7.7.56)	fig|227866.17.peg.3572
RNA Metabolism	RNA processing and modification	tRNA processing	tRNA pseudouridine synthase A (EC 4.2.1.70)	fig|227866.17.peg.4305
RNA Metabolism	RNA processing and modification	RNA processing orphans	2'-5' RNA ligase	fig|227866.17.peg.3733
RNA Metabolism	RNA processing and modification	RNA processing orphans	2H phosphoesterase superfamily protein Bsu1186 (yjcG)	fig|227866.17.peg.1492
RNA Metabolism	Transcription	Transcription initiation, bacterial sigma factors	RNA polymerase sigma factor RpoD	fig|227866.17.peg.135, fig|227866.17.peg.1410
RNA Metabolism	Transcription	Transcription initiation, bacterial sigma factors	RNA polymerase sporulation specific sigma factor SigE	fig|227866.17.peg.990
RNA Metabolism	Transcription	Transcription initiation, bacterial sigma factors	RNA polymerase sporulation specific sigma factor SigH	fig|227866.17.peg.4255
RNA Metabolism	Transcription	Transcription initiation, bacterial sigma factors	RNA polymerase sigma factor RpoE	fig|227866.17.peg.1055
RNA Metabolism	Transcription	Transcription initiation, bacterial sigma factors	RNA polymerase heat shock sigma factor SigI	fig|227866.17.peg.1199
RNA Metabolism	Transcription	Transcription initiation, bacterial sigma factors	RNA polymerase sporulation specific sigma factor SigF	fig|227866.17.peg.324
RNA Metabolism	Transcription	Transcription initiation, bacterial sigma factors	RNA polymerase sigma factor SigB	fig|227866.17.peg.3093
RNA Metabolism	Transcription	Transcription initiation, bacterial sigma factors	RNA polymerase sigma-54 factor RpoN	fig|227866.17.peg.2597
RNA Metabolism	Transcription	Transcription initiation, bacterial sigma factors	RNA polymerase sigma factor SigV	fig|227866.17.peg.3892, fig|227866.17.peg.4213
RNA Metabolism	Transcription	Transcription initiation, bacterial sigma factors	RNA polymerase sigma-70 factor	fig|227866.17.peg.1298, fig|227866.17.peg.1741, fig|227866.17.peg.2112
RNA Metabolism	Transcription	Transcription initiation, bacterial sigma factors	RNA polymerase sporulation specific sigma factor SigK	fig|227866.17.peg.4142
RNA Metabolism	Transcription	Transcription initiation, bacterial sigma factors	RNA polymerase sporulation specific sigma factor SigG	fig|227866.17.peg.989
RNA Metabolism	Transcription	Transcription initiation, bacterial sigma factors	RNA polymerase sigma factor SigZ	fig|227866.17.peg.4186
RNA Metabolism	Transcription	Transcription initiation, bacterial sigma factors	RNA polymerase sigma factor for flagellar operon	fig|227866.17.peg.875
RNA Metabolism	Transcription	Transcription initiation, bacterial sigma factors	RNA polymerase sigma factor SigW	fig|227866.17.peg.3402
RNA Metabolism	Transcription	RNA polymerase bacterial	DNA-directed RNA polymerase delta subunit (EC 2.7.7.6)	fig|227866.17.peg.2281
RNA Metabolism	Transcription	RNA polymerase bacterial	DNA-directed RNA polymerase alpha subunit (EC 2.7.7.6)	fig|227866.17.peg.4300
RNA Metabolism	Transcription	RNA polymerase bacterial	DNA-directed RNA polymerase beta' subunit (EC 2.7.7.6)	fig|227866.17.peg.4265
RNA Metabolism	Transcription	RNA polymerase bacterial	DNA-directed RNA polymerase omega subunit (EC 2.7.7.6)	fig|227866.17.peg.953
RNA Metabolism	Transcription	RNA polymerase bacterial	DNA-directed RNA polymerase beta subunit (EC 2.7.7.6)	fig|227866.17.peg.4264
RNA Metabolism	Transcription	Transcription factors bacterial	Transcription termination protein NusB	fig|227866.17.peg.227
RNA Metabolism	Transcription	Transcription factors bacterial	Transcription accessory protein (S1 RNA-binding domain)	fig|227866.17.peg.3091
RNA Metabolism	Transcription	Transcription factors bacterial	Transcription elongation factor GreA	fig|227866.17.peg.3455
RNA Metabolism	Transcription	Transcription factors bacterial	Transcription termination factor Rho	fig|227866.17.peg.2290
RNA Metabolism	Transcription	Transcription factors bacterial	Transcription antitermination protein NusG	fig|227866.17.peg.4258
RNA Metabolism	Transcription	Transcription factors bacterial	Transcription-repair coupling factor	fig|227866.17.peg.4348
RNA Metabolism	Transcription	Transcription factors bacterial	ribosomal protein L7Ae family protein	fig|227866.17.peg.860
RNA Metabolism	Transcription	Transcription factors bacterial	COG2740: Predicted nucleic-acid-binding protein implicated in transcription termination	fig|227866.17.peg.861
RNA Metabolism	Transcription	Transcription factors bacterial	FIG000325: clustered with transcription termination protein NusA	fig|227866.17.peg.863
RNA Metabolism	Transcription	Transcription factors bacterial	Transcription termination protein NusA	fig|227866.17.peg.862
RNA Metabolism	Transcription	Rrf2 family transcriptional regulators	Nitrite-sensitive transcriptional repressor NsrR	fig|227866.17.peg.1755
RNA Metabolism	Transcription	Rrf2 family transcriptional regulators	Rrf2 family transcriptional regulator	fig|227866.17.peg.2238
RNA Metabolism	Transcription	Rrf2 family transcriptional regulators	Rrf2 family transcriptional regulator, group III	fig|227866.17.peg.1059, fig|227866.17.peg.2341
RNA Metabolism	Transcription	Rrf2 family transcriptional regulators	Iron-sulfur cluster regulator IscR	fig|227866.17.peg.3477
Nucleosides and Nucleotides	Pyrimidines	pyrimidine conversions	Nucleoside diphosphate kinase (EC 2.7.4.6)	fig|227866.17.peg.398
Nucleosides and Nucleotides	Pyrimidines	pyrimidine conversions	Uridine kinase (EC 2.7.1.48) [C1]	fig|227866.17.peg.3456
Nucleosides and Nucleotides	Pyrimidines	pyrimidine conversions	Thymidylate kinase (EC 2.7.4.9)	fig|227866.17.peg.1890, fig|227866.17.peg.4376
Nucleosides and Nucleotides	Pyrimidines	pyrimidine conversions	Thioredoxin reductase (EC 1.8.1.9)	fig|227866.17.peg.373, fig|227866.17.peg.2537, fig|227866.17.peg.2833, fig|227866.17.peg.3252
Nucleosides and Nucleotides	Pyrimidines	pyrimidine conversions	Pyrimidine-nucleoside phosphorylase (EC 2.4.2.2)	fig|227866.17.peg.2029
Nucleosides and Nucleotides	Pyrimidines	pyrimidine conversions	Cytidylate kinase (EC 2.7.4.25)	fig|227866.17.peg.379
Nucleosides and Nucleotides	Pyrimidines	pyrimidine conversions	Thymidine kinase (EC 2.7.1.21)	fig|227866.17.peg.1448, fig|227866.17.peg.2292
Nucleosides and Nucleotides	Pyrimidines	pyrimidine conversions	Purine nucleoside phosphorylase (EC 2.4.2.1)	fig|227866.17.peg.320, fig|227866.17.peg.531, fig|227866.17.peg.3403
Nucleosides and Nucleotides	Pyrimidines	pyrimidine conversions	5'-nucleotidase (EC 3.1.3.5)	fig|227866.17.peg.1776, fig|227866.17.peg.4044
Nucleosides and Nucleotides	Pyrimidines	pyrimidine conversions	Thymidylate synthase (EC 2.1.1.45)	fig|227866.17.peg.748
Nucleosides and Nucleotides	Pyrimidines	pyrimidine conversions	Cytidine deaminase (EC 3.5.4.5)	fig|227866.17.peg.125
Nucleosides and Nucleotides	Pyrimidines	pyrimidine conversions	Uracil phosphoribosyltransferase (EC 2.4.2.9)	fig|227866.17.peg.975, fig|227866.17.peg.2310
Nucleosides and Nucleotides	Pyrimidines	pyrimidine conversions	2',3'-cyclic-nucleotide 2'-phosphodiesterase (EC 3.1.4.16)	fig|227866.17.peg.4044
Nucleosides and Nucleotides	Pyrimidines	pyrimidine conversions	CTP synthase (EC 6.3.4.2)	fig|227866.17.peg.2282
Nucleosides and Nucleotides	Pyrimidines	De Novo Pyrimidine Synthesis	Uracil permease	fig|227866.17.peg.974
Nucleosides and Nucleotides	Pyrimidines	De Novo Pyrimidine Synthesis	Orotidine 5'-phosphate decarboxylase (EC 4.1.1.23)	fig|227866.17.peg.967
Nucleosides and Nucleotides	Pyrimidines	De Novo Pyrimidine Synthesis	Dihydroorotate dehydrogenase electron transfer subunit (EC 1.3.3.1)	fig|227866.17.peg.969
Nucleosides and Nucleotides	Pyrimidines	De Novo Pyrimidine Synthesis	Aspartate carbamoyltransferase (EC 2.1.3.2)	fig|227866.17.peg.973
Nucleosides and Nucleotides	Pyrimidines	De Novo Pyrimidine Synthesis	Dihydroorotate dehydrogenase, catalytic subunit (EC 1.3.3.1)	fig|227866.17.peg.968
Nucleosides and Nucleotides	Pyrimidines	De Novo Pyrimidine Synthesis	Carbamoyl-phosphate synthase small chain (EC 6.3.5.5)	fig|227866.17.peg.971, fig|227866.17.peg.1560
Nucleosides and Nucleotides	Pyrimidines	De Novo Pyrimidine Synthesis	Orotate phosphoribosyltransferase (EC 2.4.2.10)	fig|227866.17.peg.966
Nucleosides and Nucleotides	Pyrimidines	De Novo Pyrimidine Synthesis	Carbamoyl-phosphate synthase large chain (EC 6.3.5.5)	fig|227866.17.peg.970, fig|227866.17.peg.1559
Nucleosides and Nucleotides	Pyrimidines	De Novo Pyrimidine Synthesis	Uracil phosphoribosyltransferase (EC 2.4.2.9)	fig|227866.17.peg.975, fig|227866.17.peg.2310
Nucleosides and Nucleotides	Pyrimidines	De Novo Pyrimidine Synthesis	Dihydroorotase (EC 3.5.2.3)	fig|227866.17.peg.972
Nucleosides and Nucleotides	Pyrimidines	De Novo Pyrimidine Synthesis	Pyrimidine operon regulatory protein PyrR	fig|227866.17.peg.975
Nucleosides and Nucleotides	Purines	De Novo Purine Biosynthesis	Ribose-phosphate pyrophosphokinase (EC 2.7.6.1)	fig|227866.17.peg.4352
Nucleosides and Nucleotides	Purines	De Novo Purine Biosynthesis	Phosphoribosylglycinamide formyltransferase (EC 2.1.2.2)	fig|227866.17.peg.3909
Nucleosides and Nucleotides	Purines	De Novo Purine Biosynthesis	Phosphoribosylaminoimidazole-succinocarboxamide synthase (EC 6.3.2.6)	fig|227866.17.peg.3903
Nucleosides and Nucleotides	Purines	De Novo Purine Biosynthesis	Adenylosuccinate lyase (EC 4.3.2.2)	fig|227866.17.peg.3902
Nucleosides and Nucleotides	Purines	De Novo Purine Biosynthesis	Phosphoribosylformylglycinamidine cyclo-ligase (EC 6.3.3.1)	fig|227866.17.peg.3908
Nucleosides and Nucleotides	Purines	De Novo Purine Biosynthesis	Phosphoribosylformylglycinamidine synthase, PurS subunit (EC 6.3.5.3)	fig|227866.17.peg.3904
Nucleosides and Nucleotides	Purines	De Novo Purine Biosynthesis	Phosphoribosylformylglycinamidine synthase, glutamine amidotransferase subunit (EC 6.3.5.3)	fig|227866.17.peg.3905
Nucleosides and Nucleotides	Purines	De Novo Purine Biosynthesis	Amidophosphoribosyltransferase (EC 2.4.2.14)	fig|227866.17.peg.3907
Nucleosides and Nucleotides	Purines	De Novo Purine Biosynthesis	IMP cyclohydrolase (EC 3.5.4.10)	fig|227866.17.peg.3910
Nucleosides and Nucleotides	Purines	De Novo Purine Biosynthesis	Phosphoribosylamine--glycine ligase (EC 6.3.4.13)	fig|227866.17.peg.3911
Nucleosides and Nucleotides	Purines	De Novo Purine Biosynthesis	Phosphoribosylaminoimidazole carboxylase catalytic subunit (EC 4.1.1.21)	fig|227866.17.peg.3900
Nucleosides and Nucleotides	Purines	De Novo Purine Biosynthesis	Phosphoribosylglycinamide formyltransferase 2 (EC 2.1.2.-)	fig|227866.17.peg.3361
Nucleosides and Nucleotides	Purines	De Novo Purine Biosynthesis	PurR: transcription regulator associated with purine metabolism	fig|227866.17.peg.4357
Nucleosides and Nucleotides	Purines	De Novo Purine Biosynthesis	Phosphoribosylaminoimidazolecarboxamide formyltransferase (EC 2.1.2.3)	fig|227866.17.peg.3910
Nucleosides and Nucleotides	Purines	De Novo Purine Biosynthesis	Phosphoribosylaminoimidazole carboxylase ATPase subunit (EC 4.1.1.21)	fig|227866.17.peg.3901
Nucleosides and Nucleotides	Purines	De Novo Purine Biosynthesis	Phosphoribosylformylglycinamidine synthase, synthetase subunit (EC 6.3.5.3)	fig|227866.17.peg.3906
Nucleosides and Nucleotides	Purines	Xanthine dehydrogenase subunits	Xanthine dehydrogenase, molybdenum binding subunit (EC 1.17.1.4)	fig|227866.17.peg.2794
Nucleosides and Nucleotides	Purines	Xanthine dehydrogenase subunits	Xanthine dehydrogenase, FAD binding subunit (EC 1.17.1.4)	fig|227866.17.peg.2793
Nucleosides and Nucleotides	Purines	Xanthine dehydrogenase subunits	CTP:molybdopterin cytidylyltransferase	fig|227866.17.peg.2792
Nucleosides and Nucleotides	Purines	Xanthine dehydrogenase subunits	Xanthine dehydrogenase iron-sulfur subunit (EC 1.17.1.4)	fig|227866.17.peg.2795
Nucleosides and Nucleotides	Purines	Xanthine Metabolism in Bacteria	Hypoxanthine/guanine permease PbuG	fig|227866.17.peg.3894
Nucleosides and Nucleotides	Purines	Xanthine Metabolism in Bacteria	Na+ dependent nucleoside transporter NupC	fig|227866.17.peg.2826
Nucleosides and Nucleotides	Purines	Xanthine Metabolism in Bacteria	Xanthine phosphoribosyltransferase (EC 2.4.2.22)	fig|227866.17.peg.466
Nucleosides and Nucleotides	Purines	Xanthine Metabolism in Bacteria	Xanthine permease	fig|227866.17.peg.467, fig|227866.17.peg.2199, fig|227866.17.peg.2799, fig|227866.17.peg.2800
Nucleosides and Nucleotides	Purines	Purine Utilization	Xanthine/uracil/thiamine/ascorbate permease family protein	fig|227866.17.peg.3736
Nucleosides and Nucleotides	Purines	Purine Utilization	Xanthine permease	fig|227866.17.peg.467, fig|227866.17.peg.2199, fig|227866.17.peg.2799, fig|227866.17.peg.2800
Nucleosides and Nucleotides	Purines	Purine Utilization	Xanthine dehydrogenase, molybdenum binding subunit (EC 1.17.1.4)	fig|227866.17.peg.2794
Nucleosides and Nucleotides	Purines	Purine Utilization	Xanthine dehydrogenase, FAD binding subunit (EC 1.17.1.4)	fig|227866.17.peg.2793
Nucleosides and Nucleotides	Purines	Purine Utilization	Cytosine/purine/uracil/thiamine/allantoin permease family protein	fig|227866.17.peg.2111, fig|227866.17.peg.2359
Nucleosides and Nucleotides	Purines	Purine Utilization	Guanine deaminase (EC 3.5.4.3)	fig|227866.17.peg.1230
Nucleosides and Nucleotides	Purines	Purine Utilization	Xanthine dehydrogenase iron-sulfur subunit (EC 1.17.1.4)	fig|227866.17.peg.2795
Nucleosides and Nucleotides	Purines	Purine conversions	GMP synthase [glutamine-hydrolyzing] (EC 6.3.5.2)	fig|227866.17.peg.3891
Nucleosides and Nucleotides	Purines	Purine conversions	Adenylosuccinate synthetase (EC 6.3.4.4)	fig|227866.17.peg.1923
Nucleosides and Nucleotides	Purines	Purine conversions	Inosine-5'-monophosphate dehydrogenase (EC 1.1.1.205)	fig|227866.17.peg.1120, fig|227866.17.peg.4400
Nucleosides and Nucleotides	Purines	Purine conversions	GMP reductase (EC 1.7.1.7)	fig|227866.17.peg.2831
Nucleosides and Nucleotides	Purines	Purine conversions	Hypoxanthine-guanine phosphoribosyltransferase (EC 2.4.2.8)	fig|227866.17.peg.4335
Nucleosides and Nucleotides	Purines	Purine conversions	Adenylosuccinate lyase (EC 4.3.2.2)	fig|227866.17.peg.3902
Nucleosides and Nucleotides	Purines	Purine conversions	Deoxyadenosine kinase (EC 2.7.1.76)	fig|227866.17.peg.4394, fig|227866.17.peg.4395
Nucleosides and Nucleotides	Purines	Purine conversions	Adenine phosphoribosyltransferase (EC 2.4.2.7)	fig|227866.17.peg.3487
Nucleosides and Nucleotides	Purines	Purine conversions	Guanine deaminase (EC 3.5.4.3)	fig|227866.17.peg.1230
Nucleosides and Nucleotides	Purines	Purine conversions	2',3'-cyclic-nucleotide 2'-phosphodiesterase (EC 3.1.4.16)	fig|227866.17.peg.4044
Nucleosides and Nucleotides	Purines	Purine conversions	Nucleoside diphosphate kinase (EC 2.7.4.6)	fig|227866.17.peg.398
Nucleosides and Nucleotides	Purines	Purine conversions	Adenylate kinase (EC 2.7.4.3)	fig|227866.17.peg.4293
Nucleosides and Nucleotides	Purines	Purine conversions	Deoxyguanosine kinase (EC 2.7.1.113)	fig|227866.17.peg.4394, fig|227866.17.peg.4395
Nucleosides and Nucleotides	Purines	Purine conversions	Adenine deaminase (EC 3.5.4.2)	fig|227866.17.peg.1081, fig|227866.17.peg.3915
Nucleosides and Nucleotides	Purines	Purine conversions	Purine nucleoside phosphorylase (EC 2.4.2.1)	fig|227866.17.peg.320, fig|227866.17.peg.531, fig|227866.17.peg.3403
Nucleosides and Nucleotides	Purines	Purine conversions	5'-nucleotidase (EC 3.1.3.5)	fig|227866.17.peg.1776, fig|227866.17.peg.4044
Nucleosides and Nucleotides	Purines	Purine conversions	dNTP triphosphohydrolase, putative	fig|227866.17.peg.2236
Nucleosides and Nucleotides	Purines	Purine conversions	Xanthine phosphoribosyltransferase (EC 2.4.2.22)	fig|227866.17.peg.466
Nucleosides and Nucleotides	Purines	Purine conversions	Adenosine deaminase (EC 3.5.4.4)	fig|227866.17.peg.3446
Nucleosides and Nucleotides	Purines	Purine conversions	5'-nucleotidase family protein in cluster with NagD-like phosphatase	fig|227866.17.peg.2806
Nucleosides and Nucleotides	Purines	Purine conversions	Guanylate kinase (EC 2.7.4.8)	fig|227866.17.peg.954
Nucleosides and Nucleotides	Nucleosides and Nucleotides - no subcategory	Ribonucleotide reduction	Ribonucleotide reductase of class Ib (aerobic), alpha subunit (EC 1.17.4.1)	fig|227866.17.peg.782, fig|227866.17.peg.1452
Nucleosides and Nucleotides	Nucleosides and Nucleotides - no subcategory	Ribonucleotide reduction	Ribonucleotide reduction protein NrdI	fig|227866.17.peg.783
Nucleosides and Nucleotides	Nucleosides and Nucleotides - no subcategory	Ribonucleotide reduction	Ribonucleotide reductase transcriptional regulator NrdR	fig|227866.17.peg.3640
Nucleosides and Nucleotides	Nucleosides and Nucleotides - no subcategory	Ribonucleotide reduction	Ribonucleotide reductase of class Ib (aerobic), beta subunit (EC 1.17.4.1)	fig|227866.17.peg.781, fig|227866.17.peg.1453
Nucleosides and Nucleotides	Nucleosides and Nucleotides - no subcategory	dNTP triphosphohydrolase protein family	dNTP triphosphohydrolase, putative	fig|227866.17.peg.2236
Nucleosides and Nucleotides	Nucleosides and Nucleotides - no subcategory	Adenosyl nucleosidases	S-adenosylhomocysteine nucleosidase (EC 3.2.2.9)	fig|227866.17.peg.3450
Nucleosides and Nucleotides	Nucleosides and Nucleotides - no subcategory	Adenosyl nucleosidases	Purine nucleoside phosphorylase (EC 2.4.2.1)	fig|227866.17.peg.320, fig|227866.17.peg.531, fig|227866.17.peg.3403
Nucleosides and Nucleotides	Nucleosides and Nucleotides - no subcategory	Adenosyl nucleosidases	5'-methylthioadenosine nucleosidase (EC 3.2.2.16)	fig|227866.17.peg.3450
Nucleosides and Nucleotides	Detoxification	Nucleoside triphosphate pyrophosphohydrolase MazG	Nucleoside triphosphate pyrophosphohydrolase MazG (EC 3.6.1.8)	fig|227866.17.peg.4345
Nucleosides and Nucleotides	Detoxification	Nudix proteins (nucleoside triphosphate hydrolases)	Deoxyuridine 5'-triphosphate nucleotidohydrolase (EC 3.6.1.23)	fig|227866.17.peg.752
Nucleosides and Nucleotides	Detoxification	Nudix proteins (nucleoside triphosphate hydrolases)	ADP-ribose pyrophosphatase (EC 3.6.1.13)	fig|227866.17.peg.306
Nucleosides and Nucleotides	Detoxification	Nudix proteins (nucleoside triphosphate hydrolases)	Mutator mutT protein (7,8-dihydro-8-oxoguanine-triphosphatase) (EC 3.6.1.-)	fig|227866.17.peg.2538
Nucleosides and Nucleotides	Detoxification	Housecleaning nucleoside triphosphate pyrophosphatases	Deoxyuridine 5'-triphosphate nucleotidohydrolase (EC 3.6.1.23)	fig|227866.17.peg.752
Nucleosides and Nucleotides	Detoxification	Housecleaning nucleoside triphosphate pyrophosphatases	Nucleoside 5-triphosphatase RdgB (dHAPTP, dITP, XTP-specific) (EC 3.6.1.15)	fig|227866.17.peg.3571
Nucleosides and Nucleotides	Detoxification	Housecleaning nucleoside triphosphate pyrophosphatases	5'-nucleotidase YjjG (EC 3.1.3.5)	fig|227866.17.peg.3992
Protein Metabolism	Protein folding	GroEL GroES	Heat shock protein GrpE	fig|227866.17.peg.106
Protein Metabolism	Protein folding	GroEL GroES	Heat-inducible transcription repressor HrcA	fig|227866.17.peg.105
Protein Metabolism	Protein folding	GroEL GroES	Chaperone protein DnaK	fig|227866.17.peg.107
Protein Metabolism	Protein folding	GroEL GroES	Chaperone protein DnaJ	fig|227866.17.peg.108
Protein Metabolism	Protein folding	GroEL GroES	Heat shock protein 60 family co-chaperone GroES	fig|227866.17.peg.3863
Protein Metabolism	Protein folding	GroEL GroES	Heat shock protein 60 family chaperone GroEL	fig|227866.17.peg.3864
Protein Metabolism	Protein folding	Protein chaperones	Heat shock protein GrpE	fig|227866.17.peg.106
Protein Metabolism	Protein folding	Protein chaperones	Chaperone protein DnaK	fig|227866.17.peg.107
Protein Metabolism	Protein folding	Protein chaperones	Chaperone protein DnaJ	fig|227866.17.peg.108
Protein Metabolism	Protein folding	Protein chaperones	DnaJ-class molecular chaperone CbpA	fig|227866.17.peg.789
Protein Metabolism	Protein folding	Protein chaperones	Chaperone protein HtpG	fig|227866.17.peg.1986
Protein Metabolism	Protein folding	Protein chaperones	ClpB protein	fig|227866.17.peg.1171
Protein Metabolism	Protein folding	Periplasmic disulfide interchange	Periplasmic thiol:disulfide interchange protein DsbA	fig|227866.17.peg.2676
Protein Metabolism	Protein folding	Periplasmic disulfide interchange	Cytochrome c-type biogenesis protein DsbD, protein-disulfide reductase (EC 1.8.1.8)	fig|227866.17.peg.3328
Protein Metabolism	Protein folding	Periplasmic disulfide interchange	Cytochrome c-type biogenesis protein CcdA (DsbD analog)	fig|227866.17.peg.717
Protein Metabolism	Protein folding	Peptidyl-prolyl cis-trans isomerase	Foldase protein PrsA precursor (EC 5.2.1.8)	fig|227866.17.peg.1699, fig|227866.17.peg.4331
Protein Metabolism	Protein biosynthesis	tRNA aminoacylation, Val	Valyl-tRNA synthetase (EC 6.1.1.9)	fig|227866.17.peg.3540
Protein Metabolism	Protein biosynthesis	tRNA aminoacylation, Met	Methionyl-tRNA synthetase (EC 6.1.1.10)	fig|227866.17.peg.4366
Protein Metabolism	Protein biosynthesis	tRNA aminoacylation, Ile	Isoleucyl-tRNA synthetase (EC 6.1.1.5)	fig|227866.17.peg.979
Protein Metabolism	Protein biosynthesis	tRNA aminoacylation, Arg	Arginyl-tRNA synthetase (EC 6.1.1.19)	fig|227866.17.peg.2263
Protein Metabolism	Protein biosynthesis	Translation initiation factors bacterial	Translation initiation factor 1	fig|227866.17.peg.4296
Protein Metabolism	Protein biosynthesis	Translation initiation factors bacterial	Methionyl-tRNA formyltransferase (EC 2.1.2.9)	fig|227866.17.peg.949
Protein Metabolism	Protein biosynthesis	Translation initiation factors bacterial	Translation initiation factor 3	fig|227866.17.peg.3627
Protein Metabolism	Protein biosynthesis	Translation initiation factors bacterial	Translation initiation factor 2	fig|227866.17.peg.859
Protein Metabolism	Protein biosynthesis	Translation initiation factors bacterial	Ribosome-binding factor A	fig|227866.17.peg.857
Protein Metabolism	Protein biosynthesis	tRNA aminoacylation, Gly	Glycyl-tRNA synthetase alpha chain (EC 6.1.1.14)	fig|227866.17.peg.129
Protein Metabolism	Protein biosynthesis	tRNA aminoacylation, Gly	Glycyl-tRNA synthetase beta chain (EC 6.1.1.14)	fig|227866.17.peg.130, fig|227866.17.peg.3842
Protein Metabolism	Protein biosynthesis	tRNA aminoacylation, Ala	Alanyl-tRNA synthetase (EC 6.1.1.7)	fig|227866.17.peg.3464
Protein Metabolism	Protein biosynthesis	Ribosome activity modulation	Ribosomal subunit interface protein	fig|227866.17.peg.2484
Protein Metabolism	Protein biosynthesis	tRNA aminoacylation, Trp	Tryptophanyl-tRNA synthetase (EC 6.1.1.2)	fig|227866.17.peg.1540
Protein Metabolism	Protein biosynthesis	Ribosome biogenesis bacterial	Similar to ribosomal large subunit pseudouridine synthase D, Bacillus subtilis YhcT type	fig|227866.17.peg.1774
Protein Metabolism	Protein biosynthesis	Ribosome biogenesis bacterial	16S rRNA processing protein RimM	fig|227866.17.peg.921
Protein Metabolism	Protein biosynthesis	Ribosome biogenesis bacterial	TsaB protein, required for threonylcarbamoyladenosine (t(6)A) formation in tRNA	fig|227866.17.peg.3853
Protein Metabolism	Protein biosynthesis	Ribosome biogenesis bacterial	Ribosomal-protein-L7p-serine acetyltransferase	fig|227866.17.peg.3147
Protein Metabolism	Protein biosynthesis	Ribosome biogenesis bacterial	Ribosomal large subunit pseudouridine synthase D (EC 4.2.1.70)	fig|227866.17.peg.976
Protein Metabolism	Protein biosynthesis	Ribosome biogenesis bacterial	LSU m5C1962 methyltransferase RlmI	fig|227866.17.peg.2153
Protein Metabolism	Protein biosynthesis	Ribosome biogenesis bacterial	SSU rRNA (adenine(1518)-N(6)/adenine(1519)-N(6))-dimethyltransferase (EC 2.1.1.182)	fig|227866.17.peg.4362
Protein Metabolism	Protein biosynthesis	Ribosome biogenesis bacterial	hypothetical protein sometimes fused to ribosomal protein S6 glutaminyl transferase	fig|227866.17.peg.2974
Protein Metabolism	Protein biosynthesis	Ribosome biogenesis bacterial	Similar to ribosomal large subunit pseudouridine synthase D, Bacillus subtilis YjbO type	fig|227866.17.peg.1518
Protein Metabolism	Protein biosynthesis	Ribosome biogenesis bacterial	tRNA (Guanine37-N1) -methyltransferase (EC 2.1.1.31)	fig|227866.17.peg.920
Protein Metabolism	Protein biosynthesis	Ribosome biogenesis bacterial	Ribosomal-protein-S18p-alanine acetyltransferase (EC 2.3.1.-)	fig|227866.17.peg.3854
Protein Metabolism	Protein biosynthesis	Ribosome biogenesis bacterial	Ribonuclease M5 (EC 3.1.26.8)	fig|227866.17.peg.4363
Protein Metabolism	Protein biosynthesis	Ribosome biogenesis bacterial	LSU m3Psi1915 methyltransferase RlmH	fig|227866.17.peg.1945
Protein Metabolism	Protein biosynthesis	Ribosome biogenesis bacterial	Ribosomal protein L11 methyltransferase (EC 2.1.1.-)	fig|227866.17.peg.109
Protein Metabolism	Protein biosynthesis	Ribosome biogenesis bacterial	Ribosomal-protein-S5p-alanine acetyltransferase	fig|227866.17.peg.1487
Protein Metabolism	Protein biosynthesis	Ribosome LSU bacterial	LSU ribosomal protein L18p (L5e)	fig|227866.17.peg.4288
Protein Metabolism	Protein biosynthesis	Ribosome LSU bacterial	LSU ribosomal protein L11p (L12e)	fig|227866.17.peg.4259
Protein Metabolism	Protein biosynthesis	Ribosome LSU bacterial	LSU ribosomal protein L5p (L11e)	fig|227866.17.peg.4284
Protein Metabolism	Protein biosynthesis	Ribosome LSU bacterial	LSU ribosomal protein L23p (L23Ae)	fig|227866.17.peg.4275
Protein Metabolism	Protein biosynthesis	Ribosome LSU bacterial	LSU ribosomal protein L14p (L23e)	fig|227866.17.peg.4282
Protein Metabolism	Protein biosynthesis	Ribosome LSU bacterial	LSU ribosomal protein L31p, zinc-dependent	fig|227866.17.peg.2291
Protein Metabolism	Protein biosynthesis	Ribosome LSU bacterial	LSU ribosomal protein L2p (L8e)	fig|227866.17.peg.4276
Protein Metabolism	Protein biosynthesis	Ribosome LSU bacterial	LSU ribosomal protein L31p	fig|227866.17.peg.2291, fig|227866.17.peg.3808
Protein Metabolism	Protein biosynthesis	Ribosome LSU bacterial	LSU ribosomal protein L6p (L9e)	fig|227866.17.peg.4287
Protein Metabolism	Protein biosynthesis	Ribosome LSU bacterial	LSU ribosomal protein L21p	fig|227866.17.peg.3526
Protein Metabolism	Protein biosynthesis	Ribosome LSU bacterial	LSU ribosomal protein L24p (L26e)	fig|227866.17.peg.4283
Protein Metabolism	Protein biosynthesis	Ribosome LSU bacterial	LSU ribosomal protein L29p (L35e)	fig|227866.17.peg.4280
Protein Metabolism	Protein biosynthesis	Ribosome LSU bacterial	LSU ribosomal protein L30p (L7e)	fig|227866.17.peg.4290
Protein Metabolism	Protein biosynthesis	Ribosome LSU bacterial	LSU ribosomal protein L31p, zinc-independent	fig|227866.17.peg.3808
Protein Metabolism	Protein biosynthesis	Ribosome LSU bacterial	LSU ribosomal protein L1p (L10Ae)	fig|227866.17.peg.4260
Protein Metabolism	Protein biosynthesis	Ribosome LSU bacterial	LSU ribosomal protein L33p, zinc-dependent	fig|227866.17.peg.4256
Protein Metabolism	Protein biosynthesis	Ribosome LSU bacterial	LSU ribosomal protein L16p (L10e)	fig|227866.17.peg.4279
Protein Metabolism	Protein biosynthesis	Ribosome LSU bacterial	LSU ribosomal protein L25p	fig|227866.17.peg.4351
Protein Metabolism	Protein biosynthesis	Ribosome LSU bacterial	LSU ribosomal protein L3p (L3e)	fig|227866.17.peg.4273
Protein Metabolism	Protein biosynthesis	Ribosome LSU bacterial	LSU ribosomal protein L15p (L27Ae)	fig|227866.17.peg.4291
Protein Metabolism	Protein biosynthesis	Ribosome LSU bacterial	Firmicutes ribosomal L7Ae family protein	fig|227866.17.peg.4266
Protein Metabolism	Protein biosynthesis	Ribosome LSU bacterial	LSU ribosomal protein L33p, zinc-independent	fig|227866.17.peg.281
Protein Metabolism	Protein biosynthesis	Ribosome LSU bacterial	LSU ribosomal protein L13p (L13Ae)	fig|227866.17.peg.4306
Protein Metabolism	Protein biosynthesis	Ribosome LSU bacterial	LSU ribosomal protein L22p (L17e)	fig|227866.17.peg.4277
Protein Metabolism	Protein biosynthesis	Ribosome LSU bacterial	LSU ribosomal protein L10p (P0)	fig|227866.17.peg.4261
Protein Metabolism	Protein biosynthesis	Ribosome LSU bacterial	LSU ribosomal protein L9p	fig|227866.17.peg.1915
Protein Metabolism	Protein biosynthesis	Ribosome LSU bacterial	LSU ribosomal protein L7/L12 (P1/P2)	fig|227866.17.peg.4262
Protein Metabolism	Protein biosynthesis	Ribosome LSU bacterial	LSU ribosomal protein L28p	fig|227866.17.peg.941
Protein Metabolism	Protein biosynthesis	Ribosome LSU bacterial	LSU ribosomal protein L19p	fig|227866.17.peg.919
Protein Metabolism	Protein biosynthesis	Ribosome LSU bacterial	LSU ribosomal protein L35p	fig|227866.17.peg.3626
Protein Metabolism	Protein biosynthesis	Ribosome LSU bacterial	LSU ribosomal protein L36p	fig|227866.17.peg.4297
Protein Metabolism	Protein biosynthesis	Ribosome LSU bacterial	LSU ribosomal protein L20p	fig|227866.17.peg.1829, fig|227866.17.peg.3625
Protein Metabolism	Protein biosynthesis	Ribosome LSU bacterial	LSU ribosomal protein L33p	fig|227866.17.peg.281, fig|227866.17.peg.4256
Protein Metabolism	Protein biosynthesis	Ribosome LSU bacterial	LSU ribosomal protein L17p	fig|227866.17.peg.4301
Protein Metabolism	Protein biosynthesis	Ribosome LSU bacterial	LSU ribosomal protein L27p	fig|227866.17.peg.3524
Protein Metabolism	Protein biosynthesis	Ribosome LSU bacterial	LSU ribosomal protein L4p (L1e)	fig|227866.17.peg.4274
Protein Metabolism	Protein biosynthesis	Programmed frameshift	programmed frameshift-containing	fig|227866.17.peg.2486
Protein Metabolism	Protein biosynthesis	Programmed frameshift	Peptide chain release factor 2	fig|227866.17.peg.2486
Protein Metabolism	Protein biosynthesis	tRNA aminoacylation, Cys	Cysteinyl-tRNA synthetase (EC 6.1.1.16)	fig|227866.17.peg.4251
Protein Metabolism	Protein biosynthesis	Translation termination factors bacterial	Protein-N(5)-glutamine methyltransferase PrmC, methylates polypeptide chain release factors RF1 and RF2	fig|227866.17.peg.2298
Protein Metabolism	Protein biosynthesis	Translation termination factors bacterial	Ribosome recycling factor	fig|227866.17.peg.870
Protein Metabolism	Protein biosynthesis	Translation termination factors bacterial	Peptidyl-tRNA hydrolase (EC 3.1.1.29)	fig|227866.17.peg.4350
Protein Metabolism	Protein biosynthesis	Translation termination factors bacterial	Peptide deformylase (EC 3.5.1.88)	fig|227866.17.peg.950, fig|227866.17.peg.1076
Protein Metabolism	Protein biosynthesis	Translation termination factors bacterial	tmRNA-binding protein SmpB	fig|227866.17.peg.2661
Protein Metabolism	Protein biosynthesis	Translation termination factors bacterial	Peptide chain release factor 1	fig|227866.17.peg.2297
Protein Metabolism	Protein biosynthesis	Translation termination factors bacterial	Methionine aminopeptidase (EC 3.4.11.18)	fig|227866.17.peg.4030, fig|227866.17.peg.4294
Protein Metabolism	Protein biosynthesis	Translation termination factors bacterial	Peptide chain release factor 2	fig|227866.17.peg.2486
Protein Metabolism	Protein biosynthesis	Universal GTPases	Signal recognition particle, subunit Ffh SRP54 (TC 3.A.5.1.1)	fig|227866.17.peg.925
Protein Metabolism	Protein biosynthesis	Universal GTPases	GTP-binding protein EngA	fig|227866.17.peg.386
Protein Metabolism	Protein biosynthesis	Universal GTPases	GTP-binding protein YqeH, required for biogenesis of 30S ribosome subunit	fig|227866.17.peg.85
Protein Metabolism	Protein biosynthesis	Universal GTPases	GTP-binding protein HflX	fig|227866.17.peg.775
Protein Metabolism	Protein biosynthesis	Universal GTPases	Signal recognition particle receptor protein FtsY (=alpha subunit) (TC 3.A.5.1.1)	fig|227866.17.peg.928
Protein Metabolism	Protein biosynthesis	Universal GTPases	50S ribosomal subunit maturation GTPase RbgA (B. subtilis YlqF)	fig|227866.17.peg.918
Protein Metabolism	Protein biosynthesis	Universal GTPases	GTP-binding protein TypA/BipA	fig|227866.17.peg.1051
Protein Metabolism	Protein biosynthesis	Universal GTPases	Translation elongation factor LepA	fig|227866.17.peg.103
Protein Metabolism	Protein biosynthesis	Universal GTPases	Translation initiation factor 2	fig|227866.17.peg.859
Protein Metabolism	Protein biosynthesis	Universal GTPases	Ribosome small subunit-stimulated GTPase EngC	fig|227866.17.peg.944
Protein Metabolism	Protein biosynthesis	Universal GTPases	Translation elongation factor G	fig|227866.17.peg.4269
Protein Metabolism	Protein biosynthesis	Universal GTPases	GTP-binding protein Era	fig|227866.17.peg.126
Protein Metabolism	Protein biosynthesis	Universal GTPases	GTPase and tRNA-U34 5-formylation enzyme TrmE	fig|227866.17.peg.1870
Protein Metabolism	Protein biosynthesis	Universal GTPases	GTP-binding and nucleic acid-binding protein YchF	fig|227866.17.peg.1881
Protein Metabolism	Protein biosynthesis	Universal GTPases	Translation elongation factor Tu	fig|227866.17.peg.4270
Protein Metabolism	Protein biosynthesis	Universal GTPases	GTP-binding protein Obg	fig|227866.17.peg.3521
Protein Metabolism	Protein biosynthesis	Universal GTPases	GTP-binding protein EngB	fig|227866.17.peg.3551
Protein Metabolism	Protein biosynthesis	tRNA aminoacylation, His	Histidyl-tRNA synthetase (EC 6.1.1.21)	fig|227866.17.peg.3482
Protein Metabolism	Protein biosynthesis	tRNA aminoacylation, Asp and Asn	Aspartyl-tRNA(Asn) amidotransferase subunit C (EC 6.3.5.6)	fig|227866.17.peg.3927
Protein Metabolism	Protein biosynthesis	tRNA aminoacylation, Asp and Asn	Aspartyl-tRNA(Asn) amidotransferase subunit B (EC 6.3.5.6)	fig|227866.17.peg.3929
Protein Metabolism	Protein biosynthesis	tRNA aminoacylation, Asp and Asn	Aspartyl-tRNA synthetase (EC 6.1.1.12)	fig|227866.17.peg.3481
Protein Metabolism	Protein biosynthesis	tRNA aminoacylation, Asp and Asn	Asparaginyl-tRNA synthetase (EC 6.1.1.22)	fig|227866.17.peg.437
Protein Metabolism	Protein biosynthesis	tRNA aminoacylation, Asp and Asn	Aspartyl-tRNA(Asn) amidotransferase subunit A (EC 6.3.5.6)	fig|227866.17.peg.3928
Protein Metabolism	Protein biosynthesis	Translation elongation factors bacterial	Translation elongation factor G	fig|227866.17.peg.4269
Protein Metabolism	Protein biosynthesis	Translation elongation factors bacterial	Translation elongation factor LepA	fig|227866.17.peg.103
Protein Metabolism	Protein biosynthesis	Translation elongation factors bacterial	Translation elongation factor Tu	fig|227866.17.peg.4270
Protein Metabolism	Protein biosynthesis	Translation elongation factors bacterial	Translation elongation factor Ts	fig|227866.17.peg.872
Protein Metabolism	Protein biosynthesis	Translation elongation factors bacterial	Translation elongation factor P	fig|227866.17.peg.214
Protein Metabolism	Protein biosynthesis	tRNAs	tRNA-Phe-GAA	fig|227866.17.rna.20, fig|227866.17.rna.47, fig|227866.17.rna.81
Protein Metabolism	Protein biosynthesis	tRNAs	tRNA-Leu-CAG	fig|227866.17.rna.92
Protein Metabolism	Protein biosynthesis	tRNAs	tRNA-Arg-ACG	fig|227866.17.rna.33, fig|227866.17.rna.34, fig|227866.17.rna.56, fig|227866.17.rna.89
Protein Metabolism	Protein biosynthesis	tRNAs	tRNA-Val-GAC	fig|227866.17.rna.8, fig|227866.17.rna.52
Protein Metabolism	Protein biosynthesis	tRNAs	tRNA-Trp-CCA	fig|227866.17.rna.17, fig|227866.17.rna.38
Protein Metabolism	Protein biosynthesis	tRNAs	tRNA-Leu-CAA	fig|227866.17.rna.10, fig|227866.17.rna.41, fig|227866.17.rna.42
Protein Metabolism	Protein biosynthesis	tRNAs	tRNA-Gly-GCC	fig|227866.17.rna.13, fig|227866.17.rna.14, fig|227866.17.rna.32, fig|227866.17.rna.91
Protein Metabolism	Protein biosynthesis	tRNAs	tRNA-Leu-GAG	fig|227866.17.rna.57
Protein Metabolism	Protein biosynthesis	tRNAs	tRNA-Arg-CCG	fig|227866.17.rna.48
Protein Metabolism	Protein biosynthesis	tRNAs	tRNA-Ser-GGA	fig|227866.17.rna.25
Protein Metabolism	Protein biosynthesis	tRNAs	tRNA-Ala-GGC	fig|227866.17.rna.49
Protein Metabolism	Protein biosynthesis	tRNAs	tRNA-Cys-GCA	fig|227866.17.rna.12
Protein Metabolism	Protein biosynthesis	tRNA aminoacylation, Lys	Lysyl-tRNA synthetase (class II) (EC 6.1.1.6)	fig|227866.17.peg.4321
Protein Metabolism	Protein biosynthesis	tRNA aminoacylation, Thr	Threonyl-tRNA synthetase (EC 6.1.1.3)	fig|227866.17.peg.2241, fig|227866.17.peg.3635
Protein Metabolism	Protein biosynthesis	tRNA aminoacylation, Pro	Prolyl-tRNA synthetase (EC 6.1.1.15), bacterial type	fig|227866.17.peg.865
Protein Metabolism	Protein biosynthesis	tRNA aminoacylation, Pro	Cys-tRNA(Pro) deacylase YbaK	fig|227866.17.peg.1359
Protein Metabolism	Protein biosynthesis	tRNA aminoacylation, Pro	tRNA proofreading protein STM4549	fig|227866.17.peg.2249
Protein Metabolism	Protein biosynthesis	Translation elongation factor G family	Translation elongation factor G	fig|227866.17.peg.4269
Protein Metabolism	Protein biosynthesis	tRNA aminoacylation, Glu and Gln	Glutamyl-tRNA(Gln) amidotransferase subunit A (EC 6.3.5.7)	fig|227866.17.peg.3928
Protein Metabolism	Protein biosynthesis	tRNA aminoacylation, Glu and Gln	Glutamyl-tRNA synthetase (EC 6.1.1.17)	fig|227866.17.peg.4248
Protein Metabolism	Protein biosynthesis	tRNA aminoacylation, Glu and Gln	Glutamyl-tRNA(Gln) amidotransferase subunit B (EC 6.3.5.7)	fig|227866.17.peg.3929
Protein Metabolism	Protein biosynthesis	tRNA aminoacylation, Glu and Gln	Glutamyl-tRNA(Gln) synthetase (EC 6.1.1.24)	fig|227866.17.peg.4248
Protein Metabolism	Protein biosynthesis	tRNA aminoacylation, Glu and Gln	Glutamyl-tRNA(Gln) amidotransferase subunit C (EC 6.3.5.7)	fig|227866.17.peg.3927
Protein Metabolism	Protein biosynthesis	tRNA aminoacylation, Ser	Seryl-tRNA synthetase (EC 6.1.1.11)	fig|227866.17.peg.4396
Protein Metabolism	Protein biosynthesis	tRNA aminoacylation, Tyr	Tyrosyl-tRNA synthetase (EC 6.1.1.1)	fig|227866.17.peg.2142, fig|227866.17.peg.3703
Protein Metabolism	Protein biosynthesis	tRNA aminoacylation, Leu	Leucyl-tRNA synthetase (EC 6.1.1.4)	fig|227866.17.peg.3768
Protein Metabolism	Protein biosynthesis	Glycyl-tRNA synthetase	Glycyl-tRNA synthetase alpha chain (EC 6.1.1.14)	fig|227866.17.peg.129
Protein Metabolism	Protein biosynthesis	Glycyl-tRNA synthetase	Glycyl-tRNA synthetase beta chain (EC 6.1.1.14)	fig|227866.17.peg.130, fig|227866.17.peg.3842
Protein Metabolism	Protein biosynthesis	tRNA aminoacylation, Phe	Phenylalanyl-tRNA synthetase alpha chain (EC 6.1.1.20)	fig|227866.17.peg.3602
Protein Metabolism	Protein biosynthesis	tRNA aminoacylation, Phe	Phenylalanyl-tRNA synthetase domain protein (Bsu YtpR)	fig|227866.17.peg.3717
Protein Metabolism	Protein biosynthesis	tRNA aminoacylation, Phe	Phenylalanyl-tRNA synthetase beta chain (EC 6.1.1.20)	fig|227866.17.peg.3601
Protein Metabolism	Protein processing and modification	Lipoprotein Biosynthesis	Lipoprotein signal peptidase (EC 3.4.23.36)	fig|227866.17.peg.977
Protein Metabolism	Protein processing and modification	Lipoprotein Biosynthesis	Prolipoprotein diacylglyceryl transferase (EC 2.4.99.-)	fig|227866.17.peg.2517
Protein Metabolism	Protein processing and modification	Signal peptidase	Signal peptidase I (EC 3.4.21.89)	fig|227866.17.peg.338, fig|227866.17.peg.1092, fig|227866.17.peg.1640, fig|227866.17.peg.3169
Protein Metabolism	Protein processing and modification	Signal peptidase	Lipoprotein signal peptidase (EC 3.4.23.36)	fig|227866.17.peg.977
Protein Metabolism	Protein processing and modification	G3E family of P-loop GTPases (metallocenter biosynthesis)	Putative metal chaperone, involved in Zn homeostasis, GTPase of COG0523 family	fig|227866.17.peg.3243
Protein Metabolism	Protein processing and modification	G3E family of P-loop GTPases (metallocenter biosynthesis)	Urease beta subunit (EC 3.5.1.5)	fig|227866.17.peg.2339
Protein Metabolism	Protein processing and modification	G3E family of P-loop GTPases (metallocenter biosynthesis)	Urease gamma subunit (EC 3.5.1.5)	fig|227866.17.peg.2338
Protein Metabolism	Protein processing and modification	G3E family of P-loop GTPases (metallocenter biosynthesis)	Urease alpha subunit (EC 3.5.1.5)	fig|227866.17.peg.2340
Protein Metabolism	Protein processing and modification	Ribosomal protein S5p acylation	SSU ribosomal protein S5p (S2e)	fig|227866.17.peg.4289
Protein Metabolism	Protein processing and modification	Ribosomal protein S5p acylation	Ribosomal-protein-S5p-alanine acetyltransferase	fig|227866.17.peg.1487
Protein Metabolism	Protein processing and modification	Peptide methionine sulfoxide reductase	Peptide methionine sulfoxide reductase MsrA (EC 1.8.4.11)	fig|227866.17.peg.505
Protein Metabolism	Protein processing and modification	Peptide methionine sulfoxide reductase	Peptide methionine sulfoxide reductase MsrB (EC 1.8.4.12)	fig|227866.17.peg.506
Protein Metabolism	Protein processing and modification	N-linked Glycosylation in Bacteria	UDP-glucose 4-epimerase (EC 5.1.3.2)	fig|227866.17.peg.2092, fig|227866.17.peg.3753, fig|227866.17.peg.3825, fig|227866.17.peg.3987
Protein Metabolism	Protein processing and modification	N-linked Glycosylation in Bacteria	UDP-N-acetylglucosamine 4,6-dehydratase (EC 4.2.1.-)	fig|227866.17.peg.507, fig|227866.17.peg.2582
Protein Metabolism	Protein processing and modification	N-linked Glycosylation in Bacteria	Lipid carrier : UDP-N-acetylgalactosaminyltransferase (EC 2.4.1.-)	fig|227866.17.peg.2591
Protein Metabolism	Protein processing and modification	N-linked Glycosylation in Bacteria	4-keto-6-deoxy-N-Acetyl-D-hexosaminyl-(Lipid carrier) aminotransferase	fig|227866.17.peg.2204
Protein Metabolism	Protein degradation	Aminopeptidases (EC 3.4.11.-)	Aminopeptidase S (Leu, Val, Phe, Tyr preference) (EC 3.4.11.24)	fig|227866.17.peg.1088
Protein Metabolism	Protein degradation	Aminopeptidases (EC 3.4.11.-)	Cytosol aminopeptidase PepA (EC 3.4.11.1)	fig|227866.17.peg.2839
Protein Metabolism	Protein degradation	Aminopeptidases (EC 3.4.11.-)	Aminopeptidase Y (Arg, Lys, Leu preference) (EC 3.4.11.15)	fig|227866.17.peg.2141
Protein Metabolism	Protein degradation	Protein degradation	Deblocking aminopeptidase (EC 3.4.11.-)	fig|227866.17.peg.1672
Protein Metabolism	Protein degradation	Protein degradation	Aminopeptidase YpdF (MP-, MA-, MS-, AP-, NP- specific)	fig|227866.17.peg.213
Protein Metabolism	Protein degradation	Metallocarboxypeptidases (EC 3.4.17.-)	D-alanyl-D-alanine carboxypeptidase (EC 3.4.16.4)	fig|227866.17.peg.321, fig|227866.17.peg.349, fig|227866.17.peg.533, fig|227866.17.peg.673, fig|227866.17.peg.2573, fig|227866.17.peg.4399
Protein Metabolism	Protein degradation	Metallocarboxypeptidases (EC 3.4.17.-)	Muramoyltetrapeptide carboxypeptidase (EC 3.4.17.13)	fig|227866.17.peg.583, fig|227866.17.peg.1251
Protein Metabolism	Protein degradation	Metallocarboxypeptidases (EC 3.4.17.-)	Thermostable carboxypeptidase 1 (EC 3.4.17.19)	fig|227866.17.peg.465
Protein Metabolism	Protein degradation	Proteasome bacterial	ATP-dependent Clp protease ATP-binding subunit ClpX	fig|227866.17.peg.3554
Protein Metabolism	Protein degradation	Proteasome bacterial	ATP-dependent protease La (EC 3.4.21.53) LonB Type I	fig|227866.17.peg.3553
Protein Metabolism	Protein degradation	Proteasome bacterial	Site-specific tyrosine recombinase	fig|227866.17.peg.909
Protein Metabolism	Protein degradation	Proteasome bacterial	ATP-dependent hsl protease ATP-binding subunit HslU	fig|227866.17.peg.907
Protein Metabolism	Protein degradation	Proteasome bacterial	ATP-dependent Clp protease proteolytic subunit (EC 3.4.21.92)	fig|227866.17.peg.2563
Protein Metabolism	Protein degradation	Proteasome bacterial	Lon-like protease with PDZ domain	fig|227866.17.peg.1019
Protein Metabolism	Protein degradation	Proteasome bacterial	ATP-dependent protease HslV (EC 3.4.25.-)	fig|227866.17.peg.908
Protein Metabolism	Protein degradation	Proteasome bacterial	ATP-dependent protease La (EC 3.4.21.53) Type I	fig|227866.17.peg.3552
Protein Metabolism	Protein degradation	Serine endopeptidase (EC 3.4.21.-)	Glutamyl endopeptidase precursor (EC 3.4.21.19), blaSE	fig|227866.17.peg.3360
Protein Metabolism	Protein degradation	Proteolysis in bacteria, ATP-dependent	DNA repair protein RadA	fig|227866.17.peg.4243
Protein Metabolism	Protein degradation	Proteolysis in bacteria, ATP-dependent	ATP-dependent Clp protease ATP-binding subunit ClpX	fig|227866.17.peg.3554
Protein Metabolism	Protein degradation	Proteolysis in bacteria, ATP-dependent	Putative ATP:guanido phosphotransferase YacI (EC 2.7.3.-)	fig|227866.17.peg.4241
Protein Metabolism	Protein degradation	Proteolysis in bacteria, ATP-dependent	Nucleotide excision repair protein, with UvrB/UvrC motif	fig|227866.17.peg.4240
Protein Metabolism	Protein degradation	Proteolysis in bacteria, ATP-dependent	ClpB protein	fig|227866.17.peg.1171
Protein Metabolism	Protein degradation	Proteolysis in bacteria, ATP-dependent	ATP-dependent protease HslV (EC 3.4.25.-)	fig|227866.17.peg.908
Protein Metabolism	Protein degradation	Proteolysis in bacteria, ATP-dependent	ATP-dependent protease La (EC 3.4.21.53) Type I	fig|227866.17.peg.3552
Protein Metabolism	Protein degradation	Proteolysis in bacteria, ATP-dependent	Membrane-associated protein containing RNA-binding TRAM domain and ribonuclease PIN-domain, YacL B.subtilis ortholog	fig|227866.17.peg.4245
Protein Metabolism	Protein degradation	Proteolysis in bacteria, ATP-dependent	ATP-dependent Clp protease, ATP-binding subunit ClpC	fig|227866.17.peg.4242
Protein Metabolism	Protein degradation	Proteolysis in bacteria, ATP-dependent	ATP-dependent Clp protease proteolytic subunit (EC 3.4.21.92)	fig|227866.17.peg.2563
Protein Metabolism	Protein degradation	Proteolysis in bacteria, ATP-dependent	ATP-dependent hsl protease ATP-binding subunit HslU	fig|227866.17.peg.907
Protein Metabolism	Protein degradation	Proteolysis in bacteria, ATP-dependent	Transcriptional regulator CtsR	fig|227866.17.peg.4239
Protein Metabolism	Protein degradation	Omega peptidases (EC 3.4.19.-)	Acylamino-acid-releasing enzyme (EC 3.4.19.1)	fig|227866.17.peg.2821
Protein Metabolism	Protein degradation	Omega peptidases (EC 3.4.19.-)	Pyrrolidone-carboxylate peptidase (EC 3.4.19.3)	fig|227866.17.peg.3315
Protein Metabolism	Protein degradation	Omega peptidases (EC 3.4.19.-)	Gamma-D-glutamyl-meso-diaminopimelate peptidase (EC 3.4.19.11)	fig|227866.17.peg.556, fig|227866.17.peg.1751, fig|227866.17.peg.1756
Cell Division and Cell Cycle	Checkpoint control	Bacterial checkpoint-control-related cluster	Diadenylate cyclase spyDAC	fig|227866.17.peg.554, fig|227866.17.peg.3400
Cell Division and Cell Cycle	Checkpoint control	Bacterial checkpoint-control-related cluster	Uncharacterized secreted protein associated with spyDAC	fig|227866.17.peg.3399
Cell Division and Cell Cycle	Checkpoint control	Bacterial checkpoint-control-related cluster	Phosphoglucosamine mutase (EC 5.4.2.10)	fig|227866.17.peg.3398
Cell Division and Cell Cycle	Checkpoint control	Bacterial checkpoint-control-related cluster	Bacterial checkpoint controller DisA with nucleotide-binding domain	fig|227866.17.peg.554, fig|227866.17.peg.3400
Cell Division and Cell Cycle	Cell Division and Cell Cycle - no subcategory	Control of cell elongation - division cycle in Bacilli	Cell division protein GpsB, coordinates the switch between cylindrical and septal cell wall synthesis by re-localization of PBP1	fig|227866.17.peg.455
Cell Division and Cell Cycle	Cell Division and Cell Cycle - no subcategory	Control of cell elongation - division cycle in Bacilli	Chromosome replication initiation protein DnaD	fig|227866.17.peg.438
Cell Division and Cell Cycle	Cell Division and Cell Cycle - no subcategory	Control of cell elongation - division cycle in Bacilli	Uncharacterized protein YppC	fig|227866.17.peg.443
Cell Division and Cell Cycle	Cell Division and Cell Cycle - no subcategory	Control of cell elongation - division cycle in Bacilli	FIG001721: Predicted N6-adenine-specific DNA methylase	fig|227866.17.peg.456
Cell Division and Cell Cycle	Cell Division and Cell Cycle - no subcategory	Control of cell elongation - division cycle in Bacilli	Septation ring formation regulator EzrA	fig|227866.17.peg.3695
Cell Division and Cell Cycle	Cell Division and Cell Cycle - no subcategory	Control of cell elongation - division cycle in Bacilli	FIG005686: hypothetical protein	fig|227866.17.peg.454
Cell Division and Cell Cycle	Cell Division and Cell Cycle - no subcategory	Control of cell elongation - division cycle in Bacilli	Endonuclease III (EC 4.2.99.18)	fig|227866.17.peg.439
Cell Division and Cell Cycle	Cell Division and Cell Cycle - no subcategory	Control of cell elongation - division cycle in Bacilli	RecU Holliday junction resolvase	fig|227866.17.peg.442
Cell Division and Cell Cycle	Cell Division and Cell Cycle - no subcategory	Control of cell elongation - division cycle in Bacilli	Penicillin-binding protein 1A/1B (PBP1)	fig|227866.17.peg.441
Cell Division and Cell Cycle	Cell Division and Cell Cycle - no subcategory	Control of cell elongation - division cycle in Bacilli	Hypothetical protein in cluster with penicillin-binding protein PBP1, Bacillus type	fig|227866.17.peg.440
Cell Division and Cell Cycle	Cell Division and Cell Cycle - no subcategory	YgjD and YeaZ	TsaD/Kae1/Qri7 protein, required for threonylcarbamoyladenosine t(6)A37 formation in tRNA	fig|227866.17.peg.3428, fig|227866.17.peg.3855
Cell Division and Cell Cycle	Cell Division and Cell Cycle - no subcategory	YgjD and YeaZ	TsaB protein, required for threonylcarbamoyladenosine (t(6)A) formation in tRNA	fig|227866.17.peg.3853
Cell Division and Cell Cycle	Cell Division and Cell Cycle - no subcategory	Macromolecular synthesis operon	TsaD/Kae1/Qri7 protein, required for threonylcarbamoyladenosine t(6)A37 formation in tRNA	fig|227866.17.peg.3428, fig|227866.17.peg.3855
Cell Division and Cell Cycle	Cell Division and Cell Cycle - no subcategory	Macromolecular synthesis operon	RNA polymerase sigma factor RpoD	fig|227866.17.peg.135, fig|227866.17.peg.1410
Cell Division and Cell Cycle	Cell Division and Cell Cycle - no subcategory	Macromolecular synthesis operon	DNA primase (EC 2.7.7.-)	fig|227866.17.peg.134, fig|227866.17.peg.1480
Cell Division and Cell Cycle	Cell Division and Cell Cycle - no subcategory	Macromolecular synthesis operon	Transamidase GatB domain protein	fig|227866.17.peg.114
Cell Division and Cell Cycle	Cell Division and Cell Cycle - no subcategory	Macromolecular synthesis operon	SSU ribosomal protein S21p	fig|227866.17.peg.113
Cell Division and Cell Cycle	Cell Division and Cell Cycle - no subcategory	Macromolecular synthesis operon	Carbamoyl-phosphate synthase small chain (EC 6.3.5.5)	fig|227866.17.peg.971, fig|227866.17.peg.1560
Cell Division and Cell Cycle	Cell Division and Cell Cycle - no subcategory	Macromolecular synthesis operon	Carbamoyl-phosphate synthase large chain (EC 6.3.5.5)	fig|227866.17.peg.970, fig|227866.17.peg.1559
Cell Division and Cell Cycle	Cell Division and Cell Cycle - no subcategory	Bacterial Cytoskeleton	Septum site-determining protein MinC	fig|227866.17.peg.3530
Cell Division and Cell Cycle	Cell Division and Cell Cycle - no subcategory	Bacterial Cytoskeleton	Cell division protein FtsI [Peptidoglycan synthetase] (EC 2.4.1.129)	fig|227866.17.peg.155, fig|227866.17.peg.1006, fig|227866.17.peg.1135, fig|227866.17.peg.3454
Cell Division and Cell Cycle	Cell Division and Cell Cycle - no subcategory	Bacterial Cytoskeleton	Cell division protein FtsW	fig|227866.17.peg.1002, fig|227866.17.peg.1042, fig|227866.17.peg.2179
Cell Division and Cell Cycle	Cell Division and Cell Cycle - no subcategory	Bacterial Cytoskeleton	Chromosome (plasmid) partitioning protein ParB	fig|227866.17.peg.1873, fig|227866.17.peg.1876
Cell Division and Cell Cycle	Cell Division and Cell Cycle - no subcategory	Bacterial Cytoskeleton	Cell-shape determining protein MreBH	fig|227866.17.peg.1086
Cell Division and Cell Cycle	Cell Division and Cell Cycle - no subcategory	Bacterial Cytoskeleton	Rod shape-determining protein MreD	fig|227866.17.peg.3531
Cell Division and Cell Cycle	Cell Division and Cell Cycle - no subcategory	Bacterial Cytoskeleton	Cell division protein FtsL	fig|227866.17.peg.1008
Cell Division and Cell Cycle	Cell Division and Cell Cycle - no subcategory	Bacterial Cytoskeleton	Cell division protein FtsK	fig|227866.17.peg.841, fig|227866.17.peg.3716
Cell Division and Cell Cycle	Cell Division and Cell Cycle - no subcategory	Bacterial Cytoskeleton	MreB-like protein (Mbl protein)	fig|227866.17.peg.2364
Cell Division and Cell Cycle	Cell Division and Cell Cycle - no subcategory	Bacterial Cytoskeleton	Septum formation protein Maf	fig|227866.17.peg.3535
Cell Division and Cell Cycle	Cell Division and Cell Cycle - no subcategory	Bacterial Cytoskeleton	Septum site-determining protein MinD	fig|227866.17.peg.3529
Cell Division and Cell Cycle	Cell Division and Cell Cycle - no subcategory	Bacterial Cytoskeleton	Chromosome (plasmid) partitioning protein ParA	fig|227866.17.peg.1875
Cell Division and Cell Cycle	Cell Division and Cell Cycle - no subcategory	Bacterial Cytoskeleton	Cell division protein DivIC (FtsB), stabilizes FtsL against RasP cleavage	fig|227866.17.peg.4341
Cell Division and Cell Cycle	Cell Division and Cell Cycle - no subcategory	Bacterial Cytoskeleton	Cell division protein FtsZ (EC 3.4.24.-)	fig|227866.17.peg.994
Cell Division and Cell Cycle	Cell Division and Cell Cycle - no subcategory	Bacterial Cytoskeleton	Cell division initiation protein DivIVA	fig|227866.17.peg.980
Cell Division and Cell Cycle	Cell Division and Cell Cycle - no subcategory	Bacterial Cytoskeleton	Cell division protein FtsA	fig|227866.17.peg.995
Cell Division and Cell Cycle	Cell Division and Cell Cycle - no subcategory	Bacterial Cytoskeleton	Rod shape-determining protein MreB	fig|227866.17.peg.3533
Cell Division and Cell Cycle	Cell Division and Cell Cycle - no subcategory	Bacterial Cytoskeleton	Rod shape-determining protein MreC	fig|227866.17.peg.3532
Cell Division and Cell Cycle	Cell Division and Cell Cycle - no subcategory	Bacterial Cytoskeleton	Cell division protein FtsQ	fig|227866.17.peg.999
Cell Division and Cell Cycle	Cell Division and Cell Cycle - no subcategory	Bacterial Cytoskeleton	Cell division protein MraZ	fig|227866.17.peg.1010
Motility and Chemotaxis	Motility and Chemotaxis - no subcategory	Bacterial Chemotaxis	Chemotaxis protein CheC -- inhibitor of MCP methylation	fig|227866.17.peg.877
Motility and Chemotaxis	Motility and Chemotaxis - no subcategory	Bacterial Chemotaxis	Flagellar motor switch protein FliM	fig|227866.17.peg.891
Motility and Chemotaxis	Motility and Chemotaxis - no subcategory	Bacterial Chemotaxis	Chemotaxis protein CheV (EC 2.7.3.-)	fig|227866.17.peg.1131
Motility and Chemotaxis	Motility and Chemotaxis - no subcategory	Bacterial Chemotaxis	Positive regulator of CheA protein activity (CheW)	fig|227866.17.peg.878
Motility and Chemotaxis	Motility and Chemotaxis - no subcategory	Bacterial Chemotaxis	Flagellar motor switch protein FliN	fig|227866.17.peg.890
Motility and Chemotaxis	Motility and Chemotaxis - no subcategory	Bacterial Chemotaxis	Signal transduction histidine kinase CheA (EC 2.7.3.-)	fig|227866.17.peg.879
Motility and Chemotaxis	Motility and Chemotaxis - no subcategory	Bacterial Chemotaxis	Maltose/maltodextrin ABC transporter, substrate binding periplasmic protein MalE	fig|227866.17.peg.2556, fig|227866.17.peg.2601
Motility and Chemotaxis	Motility and Chemotaxis - no subcategory	Bacterial Chemotaxis	Flagellar motor switch protein FliG	fig|227866.17.peg.901
Motility and Chemotaxis	Motility and Chemotaxis - no subcategory	Bacterial Chemotaxis	Chemotaxis response regulator protein-glutamate methylesterase CheB (EC 3.1.1.61)	fig|227866.17.peg.880
Motility and Chemotaxis	Motility and Chemotaxis - no subcategory	Bacterial Chemotaxis	Chemotaxis protein methyltransferase CheR (EC 2.1.1.80)	fig|227866.17.peg.400
Motility and Chemotaxis	Motility and Chemotaxis - no subcategory	Bacterial Chemotaxis	Chemotaxis protein CheD	fig|227866.17.peg.876
Motility and Chemotaxis	Motility and Chemotaxis - no subcategory	Bacterial Chemotaxis	Dipeptide-binding ABC transporter, periplasmic substrate-binding component (TC 3.A.1.5.2)	fig|227866.17.peg.1252
Motility and Chemotaxis	Motility and Chemotaxis - no subcategory	Bacterial Chemotaxis	Chemotaxis regulator - transmits chemoreceptor signals to flagelllar motor components CheY	fig|227866.17.peg.716, fig|227866.17.peg.889
Motility and Chemotaxis	Flagellar motility in Prokaryota	Flagellum in Campylobacter	Flagellar basal-body rod protein FlgC	fig|227866.17.peg.904
Motility and Chemotaxis	Flagellar motility in Prokaryota	Flagellum in Campylobacter	Flagellin protein FlaA	fig|227866.17.peg.1413, fig|227866.17.peg.2478
Motility and Chemotaxis	Flagellar motility in Prokaryota	Flagellum in Campylobacter	Cell division protein FtsI [Peptidoglycan synthetase] (EC 2.4.1.129)	fig|227866.17.peg.155, fig|227866.17.peg.1006, fig|227866.17.peg.1135, fig|227866.17.peg.3454
Motility and Chemotaxis	Flagellar motility in Prokaryota	Flagellum in Campylobacter	Flagellar hook-basal body complex protein FliE	fig|227866.17.peg.903
Motility and Chemotaxis	Flagellar motility in Prokaryota	Flagellum in Campylobacter	Flagellar basal-body rod protein FlgB	fig|227866.17.peg.905
Motility and Chemotaxis	Flagellar motility in Prokaryota	Flagellum	Flagellar synthesis regulator FleN	fig|227866.17.peg.881
Motility and Chemotaxis	Flagellar motility in Prokaryota	Flagellum	RNA polymerase sigma factor RpoD	fig|227866.17.peg.135, fig|227866.17.peg.1410
Motility and Chemotaxis	Flagellar motility in Prokaryota	Flagellum	Flagellar biosynthesis protein FliL	fig|227866.17.peg.892
Motility and Chemotaxis	Flagellar motility in Prokaryota	Flagellum	Flagellar hook-associated protein FliD	fig|227866.17.peg.2480
Motility and Chemotaxis	Flagellar motility in Prokaryota	Flagellum	Flagellar hook-associated protein FlgK	fig|227866.17.peg.2473
Motility and Chemotaxis	Flagellar motility in Prokaryota	Flagellum	Flagellar assembly protein FliH	fig|227866.17.peg.900
Motility and Chemotaxis	Flagellar motility in Prokaryota	Flagellum	Flagellar biosynthesis protein FliR	fig|227866.17.peg.885
Motility and Chemotaxis	Flagellar motility in Prokaryota	Flagellum	Flagellar biosynthesis protein FliP	fig|227866.17.peg.887
Motility and Chemotaxis	Flagellar motility in Prokaryota	Flagellum	Flagellar M-ring protein FliF	fig|227866.17.peg.902
Motility and Chemotaxis	Flagellar motility in Prokaryota	Flagellum	Flagellar basal-body rod modification protein FlgD	fig|227866.17.peg.895
Motility and Chemotaxis	Flagellar motility in Prokaryota	Flagellum	Flagellar basal-body rod protein FlgC	fig|227866.17.peg.904
Motility and Chemotaxis	Flagellar motility in Prokaryota	Flagellum	Negative regulator of flagellin synthesis	fig|227866.17.peg.2471
Motility and Chemotaxis	Flagellar motility in Prokaryota	Flagellum	Flagellar biosynthesis protein FlhB	fig|227866.17.peg.884, fig|227866.17.peg.915
Motility and Chemotaxis	Flagellar motility in Prokaryota	Flagellum	Flagellar hook-basal body complex protein FliE	fig|227866.17.peg.903
Motility and Chemotaxis	Flagellar motility in Prokaryota	Flagellum	Flagellar basal-body rod protein FlgB	fig|227866.17.peg.905
Motility and Chemotaxis	Flagellar motility in Prokaryota	Flagellum	Flagellar biosynthesis protein FliZ	fig|227866.17.peg.888
Motility and Chemotaxis	Flagellar motility in Prokaryota	Flagellum	Flagellar biosynthesis protein FliS	fig|227866.17.peg.2481
Motility and Chemotaxis	Flagellar motility in Prokaryota	Flagellum	Flagellar basal-body rod protein FlgF	fig|227866.17.peg.2365
Motility and Chemotaxis	Flagellar motility in Prokaryota	Flagellum	Flagellin protein FlaA	fig|227866.17.peg.1413, fig|227866.17.peg.2478
Motility and Chemotaxis	Flagellar motility in Prokaryota	Flagellum	Flagellar motor switch protein FliN	fig|227866.17.peg.890
Motility and Chemotaxis	Flagellar motility in Prokaryota	Flagellum	Flagellar protein FlbB	fig|227866.17.peg.897
Motility and Chemotaxis	Flagellar motility in Prokaryota	Flagellum	Flagellar basal-body rod protein FlgG	fig|227866.17.peg.894, fig|227866.17.peg.2366
Motility and Chemotaxis	Flagellar motility in Prokaryota	Flagellum	RNA polymerase sigma-54 factor RpoN	fig|227866.17.peg.2597
Motility and Chemotaxis	Flagellar motility in Prokaryota	Flagellum	Flagellar motor rotation protein MotB	fig|227866.17.peg.1173, fig|227866.17.peg.3708
Motility and Chemotaxis	Flagellar motility in Prokaryota	Flagellum	Flagellar protein FliJ	fig|227866.17.peg.898
Motility and Chemotaxis	Flagellar motility in Prokaryota	Flagellum	Flagellar hook-associated protein FlgL	fig|227866.17.peg.2474
Motility and Chemotaxis	Flagellar motility in Prokaryota	Flagellum	Flagellar biosynthesis protein FlhA	fig|227866.17.peg.883
Motility and Chemotaxis	Flagellar motility in Prokaryota	Flagellum	Flagellum-specific ATP synthase FliI	fig|227866.17.peg.899
Motility and Chemotaxis	Flagellar motility in Prokaryota	Flagellum	Flagellar biosynthesis protein FliQ	fig|227866.17.peg.886
Motility and Chemotaxis	Flagellar motility in Prokaryota	Flagellum	Flagellar hook-length control protein FliK	fig|227866.17.peg.70, fig|227866.17.peg.896
Motility and Chemotaxis	Flagellar motility in Prokaryota	Flagellum	Flagellar motor switch protein FliM	fig|227866.17.peg.891
Motility and Chemotaxis	Flagellar motility in Prokaryota	Flagellum	Flagellar biosynthesis protein FlhF	fig|227866.17.peg.882
Motility and Chemotaxis	Flagellar motility in Prokaryota	Flagellum	Flagellar motor rotation protein MotA	fig|227866.17.peg.1172, fig|227866.17.peg.3709
Motility and Chemotaxis	Flagellar motility in Prokaryota	Flagellum	Flagellar motor switch protein FliG	fig|227866.17.peg.901
Motility and Chemotaxis	Flagellar motility in Prokaryota	Flagellum	Flagellar protein FlbD	fig|227866.17.peg.893
Motility and Chemotaxis	Flagellar motility in Prokaryota	Flagellum	RNA polymerase sigma factor for flagellar operon	fig|227866.17.peg.875
Motility and Chemotaxis	Flagellar motility in Prokaryota	Flagellar motility	Flagellar synthesis regulator FleN	fig|227866.17.peg.881
Motility and Chemotaxis	Flagellar motility in Prokaryota	Flagellar motility	Chemotaxis protein CheV (EC 2.7.3.-)	fig|227866.17.peg.1131
Motility and Chemotaxis	Flagellar motility in Prokaryota	Flagellar motility	Flagellin	fig|227866.17.peg.2479, fig|227866.17.peg.2500
Motility and Chemotaxis	Flagellar motility in Prokaryota	Flagellar motility	Flagellar motor switch protein FliN	fig|227866.17.peg.890
Motility and Chemotaxis	Flagellar motility in Prokaryota	Flagellar motility	Flagellar biosynthesis protein FliR	fig|227866.17.peg.885
Motility and Chemotaxis	Flagellar motility in Prokaryota	Flagellar motility	RNA polymerase sigma-54 factor RpoN	fig|227866.17.peg.2597
Motility and Chemotaxis	Flagellar motility in Prokaryota	Flagellar motility	Flagellar motor rotation protein MotB	fig|227866.17.peg.1173, fig|227866.17.peg.3708
Motility and Chemotaxis	Flagellar motility in Prokaryota	Flagellar motility	Rrf2 family transcriptional regulator	fig|227866.17.peg.2238
Motility and Chemotaxis	Flagellar motility in Prokaryota	Flagellar motility	Flagellum-specific ATP synthase FliI	fig|227866.17.peg.899
Motility and Chemotaxis	Flagellar motility in Prokaryota	Flagellar motility	Flagellar biosynthesis protein FlhA	fig|227866.17.peg.883
Motility and Chemotaxis	Flagellar motility in Prokaryota	Flagellar motility	Flagellar basal-body rod modification protein FlgD	fig|227866.17.peg.895
Motility and Chemotaxis	Flagellar motility in Prokaryota	Flagellar motility	Flagellar motor switch protein FliM	fig|227866.17.peg.891
Motility and Chemotaxis	Flagellar motility in Prokaryota	Flagellar motility	Predicted signal transduction protein	fig|227866.17.peg.1203
Motility and Chemotaxis	Flagellar motility in Prokaryota	Flagellar motility	Flagellar biosynthesis protein FlhB	fig|227866.17.peg.884, fig|227866.17.peg.915
Motility and Chemotaxis	Flagellar motility in Prokaryota	Flagellar motility	Signal transduction histidine kinase CheA (EC 2.7.3.-)	fig|227866.17.peg.879
Motility and Chemotaxis	Flagellar motility in Prokaryota	Flagellar motility	Flagellar biosynthesis protein FlhF	fig|227866.17.peg.882
Motility and Chemotaxis	Flagellar motility in Prokaryota	Flagellar motility	Flagellar motor rotation protein MotA	fig|227866.17.peg.1172, fig|227866.17.peg.3709
Motility and Chemotaxis	Flagellar motility in Prokaryota	Flagellar motility	RNA polymerase sigma factor for flagellar operon	fig|227866.17.peg.875
Motility and Chemotaxis	Flagellar motility in Prokaryota	Flagellar motility	Chemotaxis regulator - transmits chemoreceptor signals to flagelllar motor components CheY	fig|227866.17.peg.716, fig|227866.17.peg.889
Regulation and Cell signaling	Regulation and Cell signaling - no subcategory	LysR-family proteins in Salmonella enterica Typhimurium	LysR family transcriptional regulator STM2281	fig|227866.17.peg.621, fig|227866.17.peg.2618
Regulation and Cell signaling	Regulation and Cell signaling - no subcategory	LysR-family proteins in Escherichia coli	LysR family transcriptional regulator YeiE	fig|227866.17.peg.2230
Regulation and Cell signaling	Regulation and Cell signaling - no subcategory	LysR-family proteins in Escherichia coli	Cyn operon transcriptional activator	fig|227866.17.peg.4168
Regulation and Cell signaling	Regulation and Cell signaling - no subcategory	LysR-family proteins in Escherichia coli	Cys regulon transcriptional activator CysB	fig|227866.17.peg.1119
Regulation and Cell signaling	Regulation and Cell signaling - no subcategory	LysR-family proteins in Escherichia coli	Chromosome initiation inhibitor	fig|227866.17.peg.3262
Regulation and Cell signaling	Regulation and Cell signaling - no subcategory	HPr catabolite repression system	Catabolite repression HPr-like protein Crh	fig|227866.17.peg.2542
Regulation and Cell signaling	Regulation and Cell signaling - no subcategory	HPr catabolite repression system	Catabolite control protein A	fig|227866.17.peg.3710
Regulation and Cell signaling	Regulation and Cell signaling - no subcategory	HPr catabolite repression system	HPr kinase/phosphorylase (EC 2.7.1.-) (EC 2.7.4.-)	fig|227866.17.peg.2516
Regulation and Cell signaling	Regulation and Cell signaling - no subcategory	Sex pheromones in Enterococcus faecalis and other Firmicutes	Putative pheromone cAM373 precursor lipoprotein CamS	fig|227866.17.peg.3923
Regulation and Cell signaling	Regulation and Cell signaling - no subcategory	Sex pheromones in Enterococcus faecalis and other Firmicutes	Lipoprotein signal peptidase (EC 3.4.23.36)	fig|227866.17.peg.977
Regulation and Cell signaling	Regulation and Cell signaling - no subcategory	Sex pheromones in Enterococcus faecalis and other Firmicutes	Heptaprenyl diphosphate synthase component II (EC 2.5.1.30)	fig|227866.17.peg.397
Regulation and Cell signaling	Regulation and Cell signaling - no subcategory	Sex pheromones in Enterococcus faecalis and other Firmicutes	Heptaprenyl diphosphate synthase component I (EC 2.5.1.30)	fig|227866.17.peg.395
Regulation and Cell signaling	Regulation and Cell signaling - no subcategory	Sex pheromones in Enterococcus faecalis and other Firmicutes	Oligopeptide ABC transporter, periplasmic oligopeptide-binding protein OppA (TC 3.A.1.5.1)	fig|227866.17.peg.1539, fig|227866.17.peg.1544, fig|227866.17.peg.1629
Regulation and Cell signaling	Regulation and Cell signaling - no subcategory	Zinc regulated enzymes	Queuosine biosynthesis QueD, PTPS-I	fig|227866.17.peg.1168
Regulation and Cell signaling	Regulation and Cell signaling - no subcategory	Zinc regulated enzymes	Carbonic anhydrase (EC 4.2.1.1)	fig|227866.17.peg.2550, fig|227866.17.peg.3390, fig|227866.17.peg.3807
Regulation and Cell signaling	Regulation and Cell signaling - no subcategory	Zinc regulated enzymes	Putative metal chaperone, involved in Zn homeostasis, GTPase of COG0523 family	fig|227866.17.peg.3243
Regulation and Cell signaling	Regulation and Cell signaling - no subcategory	Zinc regulated enzymes	N-acetylmuramoyl-L-alanine amidase (EC 3.5.1.28)	fig|227866.17.peg.779, fig|227866.17.peg.2450, fig|227866.17.peg.2451, fig|227866.17.peg.3484
Regulation and Cell signaling	Regulation and Cell signaling - no subcategory	Zinc regulated enzymes	GTP cyclohydrolase I (EC 3.5.4.16) type 2	fig|227866.17.peg.3245
Regulation and Cell signaling	Regulation and Cell signaling - no subcategory	Zinc regulated enzymes	Porphobilinogen synthase (EC 4.2.1.24)	fig|227866.17.peg.3545
Regulation and Cell signaling	Regulation and Cell signaling - no subcategory	Zinc regulated enzymes	Zinc uptake regulation protein ZUR	fig|227866.17.peg.146
Regulation and Cell signaling	Regulation and Cell signaling - no subcategory	Zinc regulated enzymes	Cysteinyl-tRNA synthetase (EC 6.1.1.16)	fig|227866.17.peg.4251
Regulation and Cell signaling	Regulation and Cell signaling - no subcategory	Zinc regulated enzymes	GTP cyclohydrolase I (EC 3.5.4.16) type 1	fig|227866.17.peg.393
Regulation and Cell signaling	Regulation and Cell signaling - no subcategory	Zinc regulated enzymes	Phosphoribosyl-AMP cyclohydrolase (EC 3.5.4.19)	fig|227866.17.peg.2530
Regulation and Cell signaling	Regulation and Cell signaling - no subcategory	Zinc regulated enzymes	Dihydroorotase (EC 3.5.2.3)	fig|227866.17.peg.972
Regulation and Cell signaling	Regulation and Cell signaling - no subcategory	Stringent Response, (p)ppGpp metabolism	GTP pyrophosphokinase (EC 2.7.6.5), (p)ppGpp synthetase I	fig|227866.17.peg.3486
Regulation and Cell signaling	Regulation and Cell signaling - no subcategory	Cell envelope-associated LytR-CpsA-Psr transcriptional attenuators	Cell envelope-associated transcriptional attenuator LytR-CpsA-Psr, subfamily F2 (as in PMID19099556)	fig|227866.17.peg.2423, fig|227866.17.peg.2448, fig|227866.17.peg.2462, fig|227866.17.peg.3055
Regulation and Cell signaling	Regulation of virulence	VraSR and LiaSR two-component regulatory systems	Transporter LiaF	fig|227866.17.peg.2724
Regulation and Cell signaling	Regulation of virulence	VraSR and LiaSR two-component regulatory systems	Response regulator LiaR	fig|227866.17.peg.2726
Regulation and Cell signaling	Regulation of virulence	VraSR and LiaSR two-component regulatory systems	Sensor histidine kinase LiaS	fig|227866.17.peg.2725
Regulation and Cell signaling	Programmed Cell Death and Toxin-antitoxin Systems	MazEF toxin-antitoxing (programmed cell death) system	Programmed cell death toxin YdcE	fig|227866.17.peg.3100
Regulation and Cell signaling	Programmed Cell Death and Toxin-antitoxin Systems	MazEF toxin-antitoxing (programmed cell death) system	Programmed cell death antitoxin YdcD	fig|227866.17.peg.3101
Regulation and Cell signaling	Programmed Cell Death and Toxin-antitoxin Systems	Murein hydrolase regulation and cell death	LrgA-associated membrane protein LrgB	fig|227866.17.peg.3630
Regulation and Cell signaling	Programmed Cell Death and Toxin-antitoxin Systems	Murein hydrolase regulation and cell death	Autolysis histidine kinase LytS	fig|227866.17.peg.3633
Regulation and Cell signaling	Programmed Cell Death and Toxin-antitoxin Systems	Murein hydrolase regulation and cell death	Preprotein translocase subunit SecG (TC 3.A.5.1.1)	fig|227866.17.peg.2658
Regulation and Cell signaling	Programmed Cell Death and Toxin-antitoxin Systems	Murein hydrolase regulation and cell death	LysR family regulatory protein CidR	fig|227866.17.peg.2158, fig|227866.17.peg.2405
Regulation and Cell signaling	Programmed Cell Death and Toxin-antitoxin Systems	Murein hydrolase regulation and cell death	Holin associated hypothetical protein	fig|227866.17.peg.3997
Regulation and Cell signaling	Programmed Cell Death and Toxin-antitoxin Systems	Murein hydrolase regulation and cell death	Antiholin-like protein LrgA	fig|227866.17.peg.3631
Regulation and Cell signaling	Programmed Cell Death and Toxin-antitoxin Systems	Murein hydrolase regulation and cell death	CidA-associated membrane protein CidB	fig|227866.17.peg.1967, fig|227866.17.peg.2156
Regulation and Cell signaling	Programmed Cell Death and Toxin-antitoxin Systems	Murein hydrolase regulation and cell death	Cytidine deaminase (EC 3.5.4.5)	fig|227866.17.peg.125
Regulation and Cell signaling	Programmed Cell Death and Toxin-antitoxin Systems	Murein hydrolase regulation and cell death	Holin-like protein CidA	fig|227866.17.peg.2157
Regulation and Cell signaling	Programmed Cell Death and Toxin-antitoxin Systems	Murein hydrolase regulation and cell death	Autolysis response regulater LytR	fig|227866.17.peg.3306, fig|227866.17.peg.3632
Regulation and Cell signaling	Programmed Cell Death and Toxin-antitoxin Systems	Toxin-antitoxin replicon stabilization systems	YefM protein (antitoxin to YoeB)	fig|227866.17.peg.769
Regulation and Cell signaling	Programmed Cell Death and Toxin-antitoxin Systems	Toxin-antitoxin replicon stabilization systems	HigA protein (antitoxin to HigB)	fig|227866.17.peg.1808, fig|227866.17.peg.4323
Regulation and Cell signaling	Programmed Cell Death and Toxin-antitoxin Systems	Phd-Doc, YdcE-YdcD toxin-antitoxin (programmed cell death) systems	Programmed cell death toxin YdcE	fig|227866.17.peg.3100
Regulation and Cell signaling	Programmed Cell Death and Toxin-antitoxin Systems	Phd-Doc, YdcE-YdcD toxin-antitoxin (programmed cell death) systems	Programmed cell death antitoxin YdcD	fig|227866.17.peg.3101
Secondary Metabolism	Secondary Metabolism - no subcategory	Lanthionine Synthetases	Lanthionine biosynthesis cyclase LanC	fig|227866.17.peg.2645
Secondary Metabolism	Secondary Metabolism - no subcategory	Lanthionine Synthetases	Lanthionine biosynthesis protein LanB	fig|227866.17.peg.2643
Secondary Metabolism	Plant Hormones	Auxin biosynthesis	Tryptophan synthase alpha chain (EC 4.2.1.20)	fig|227866.17.peg.409
Secondary Metabolism	Plant Hormones	Auxin biosynthesis	Anthranilate phosphoribosyltransferase (EC 2.4.2.18)	fig|227866.17.peg.405
Secondary Metabolism	Plant Hormones	Auxin biosynthesis	Tryptophan synthase beta chain (EC 4.2.1.20)	fig|227866.17.peg.408
Secondary Metabolism	Plant Hormones	Auxin biosynthesis	Phosphoribosylanthranilate isomerase (EC 5.3.1.24)	fig|227866.17.peg.407
DNA Metabolism	DNA repair	Uracil-DNA glycosylase	Uracil-DNA glycosylase, family 1	fig|227866.17.peg.2195
DNA Metabolism	DNA repair	DNA repair, bacterial MutL-MutS system	Recombination inhibitory protein MutS2	fig|227866.17.peg.3596
DNA Metabolism	DNA repair	DNA repair, bacterial MutL-MutS system	DNA mismatch repair protein MutS	fig|227866.17.peg.819
DNA Metabolism	DNA repair	DNA repair, bacterial MutL-MutS system	DNA mismatch repair protein MutL	fig|227866.17.peg.818
DNA Metabolism	DNA repair	DNA repair, UvrABC system	Excinuclease ABC subunit C	fig|227866.17.peg.3585
DNA Metabolism	DNA repair	DNA repair, UvrABC system	Excinuclease ABC subunit A	fig|227866.17.peg.2499
DNA Metabolism	DNA repair	DNA repair, UvrABC system	Excinuclease ABC subunit B	fig|227866.17.peg.2498
DNA Metabolism	DNA repair	DNA repair, bacterial DinG and relatives	DinG family ATP-dependent helicase YoaA	fig|227866.17.peg.433
DNA Metabolism	DNA repair	DNA repair, bacterial DinG and relatives	DinG family ATP-dependent helicase YpvA	fig|227866.17.peg.458
DNA Metabolism	DNA repair	DNA repair system including RecA, MutS and a hypothetical protein	DNA mismatch repair protein MutS	fig|227866.17.peg.819
DNA Metabolism	DNA repair	DNA repair system including RecA, MutS and a hypothetical protein	RecA protein	fig|227866.17.peg.829, fig|227866.17.peg.1399
DNA Metabolism	DNA repair	ATP-dependent Nuclease	ATP-dependent nuclease, subunit B	fig|227866.17.peg.1626
DNA Metabolism	DNA repair	ATP-dependent Nuclease	ATP-dependent nuclease, subunit A	fig|227866.17.peg.1625
DNA Metabolism	DNA repair	DNA repair, bacterial	Exonuclease SbcD	fig|227866.17.peg.1624
DNA Metabolism	DNA repair	DNA repair, bacterial	ADA regulatory protein	fig|227866.17.peg.3394
DNA Metabolism	DNA repair	DNA repair, bacterial	SOS-response repressor and protease LexA (EC 3.4.21.88)	fig|227866.17.peg.725
DNA Metabolism	DNA repair	DNA repair, bacterial	DNA repair protein RadC	fig|227866.17.peg.3534
DNA Metabolism	DNA repair	DNA repair, bacterial	DNA-cytosine methyltransferase (EC 2.1.1.37)	fig|227866.17.peg.1387, fig|227866.17.peg.2063
DNA Metabolism	DNA repair	DNA repair, bacterial	DNA polymerase IV (EC 2.7.7.7)	fig|227866.17.peg.277, fig|227866.17.peg.295
DNA Metabolism	DNA repair	DNA repair, bacterial	Exonuclease SbcC	fig|227866.17.peg.1623
DNA Metabolism	DNA repair	DNA repair, bacterial	Endonuclease V (EC 3.1.21.7)	fig|227866.17.peg.2393
DNA Metabolism	DNA repair	DNA repair, bacterial	DNA repair exonuclease family protein YhaO	fig|227866.17.peg.1703
DNA Metabolism	DNA repair	DNA repair, bacterial	Single-stranded DNA-binding protein	fig|227866.17.peg.1883, fig|227866.17.peg.2377, fig|227866.17.peg.2961
DNA Metabolism	DNA repair	DNA repair, bacterial	Exodeoxyribonuclease VII small subunit (EC 3.1.11.6)	fig|227866.17.peg.230
DNA Metabolism	DNA repair	DNA repair, bacterial	DNA repair protein RadA	fig|227866.17.peg.4243
DNA Metabolism	DNA repair	DNA repair, bacterial	Exodeoxyribonuclease VII large subunit (EC 3.1.11.6)	fig|227866.17.peg.229
DNA Metabolism	DNA repair	DNA repair, bacterial	DNA repair protein RecN	fig|227866.17.peg.236
DNA Metabolism	DNA repair	DNA repair, bacterial	A/G-specific adenine glycosylase (EC 3.2.2.-)	fig|227866.17.peg.4122
DNA Metabolism	DNA repair	DNA repair, bacterial	Endonuclease IV (EC 3.1.21.2)	fig|227866.17.peg.143
DNA Metabolism	DNA repair	DNA repair, bacterial	Methylated-DNA--protein-cysteine methyltransferase (EC 2.1.1.63)	fig|227866.17.peg.1189, fig|227866.17.peg.3393
DNA Metabolism	DNA repair	DNA repair, bacterial	RecA protein	fig|227866.17.peg.829, fig|227866.17.peg.1399
DNA Metabolism	DNA repair	DNA repair, bacterial	Exodeoxyribonuclease III (EC 3.1.11.2)	fig|227866.17.peg.1884
DNA Metabolism	DNA repair	DNA repair, bacterial RecFOR pathway	Recombination protein RecR	fig|227866.17.peg.4388
DNA Metabolism	DNA repair	DNA repair, bacterial RecFOR pathway	DNA recombination and repair protein RecF	fig|227866.17.peg.1863, fig|227866.17.peg.3437
DNA Metabolism	DNA repair	DNA repair, bacterial RecFOR pathway	ATP-dependent DNA helicase RecQ	fig|227866.17.peg.578
DNA Metabolism	DNA repair	DNA repair, bacterial RecFOR pathway	RecU Holliday junction resolvase	fig|227866.17.peg.442
DNA Metabolism	DNA repair	DNA repair, bacterial RecFOR pathway	Single-stranded-DNA-specific exonuclease RecJ (EC 3.1.-.-)	fig|227866.17.peg.3488
DNA Metabolism	DNA repair	DNA repair, bacterial RecFOR pathway	Single-stranded DNA-binding protein	fig|227866.17.peg.1883, fig|227866.17.peg.2377, fig|227866.17.peg.2961
DNA Metabolism	DNA repair	DNA repair, bacterial RecFOR pathway	RecA protein	fig|227866.17.peg.829, fig|227866.17.peg.1399
DNA Metabolism	DNA repair	DNA repair, bacterial RecFOR pathway	ATP-dependent DNA helicase RecS (RecQ family)	fig|227866.17.peg.366
DNA Metabolism	DNA repair	DNA repair, bacterial RecFOR pathway	DNA recombination and repair protein RecO	fig|227866.17.peg.128
DNA Metabolism	DNA repair	DNA repair, bacterial RecBCD pathway	RecD-like DNA helicase YrrC	fig|227866.17.peg.3473
DNA Metabolism	DNA repair	DNA repair, bacterial RecBCD pathway	Protease III precursor (EC 3.4.24.55)	fig|227866.17.peg.2400
DNA Metabolism	DNA repair	Nonhomologous End-Joining in Bacteria	Ku domain protein	fig|227866.17.peg.1204
DNA Metabolism	DNA repair	Nonhomologous End-Joining in Bacteria	ATP-dependent DNA ligase (EC 6.5.1.1) clustered with Ku protein, LigD	fig|227866.17.peg.1205, fig|227866.17.peg.1388
DNA Metabolism	DNA repair	DNA Repair Base Excision	Uracil-DNA glycosylase, family 1	fig|227866.17.peg.2195
DNA Metabolism	DNA repair	DNA Repair Base Excision	DNA-3-methyladenine glycosylase II (EC 3.2.2.21)	fig|227866.17.peg.2120, fig|227866.17.peg.3395, fig|227866.17.peg.4062
DNA Metabolism	DNA repair	DNA Repair Base Excision	Formamidopyrimidine-DNA glycosylase (EC 3.2.2.23)	fig|227866.17.peg.3648
DNA Metabolism	DNA repair	DNA Repair Base Excision	Ku domain protein	fig|227866.17.peg.1204
DNA Metabolism	DNA repair	DNA Repair Base Excision	ATP-dependent DNA ligase (EC 6.5.1.1) clustered with Ku protein, LigD	fig|227866.17.peg.1205, fig|227866.17.peg.1388
DNA Metabolism	DNA repair	DNA Repair Base Excision	Endonuclease III (EC 4.2.99.18)	fig|227866.17.peg.439
DNA Metabolism	DNA repair	DNA Repair Base Excision	Single-stranded-DNA-specific exonuclease RecJ (EC 3.1.-.-)	fig|227866.17.peg.3488
DNA Metabolism	DNA repair	DNA Repair Base Excision	DNA ligase (EC 6.5.1.2)	fig|227866.17.peg.3922
DNA Metabolism	DNA repair	DNA Repair Base Excision	DNA polymerase I (EC 2.7.7.7)	fig|227866.17.peg.1483, fig|227866.17.peg.3649
DNA Metabolism	DNA repair	DNA repair, bacterial UvrD and related helicases	putative ATP-dependent DNA helicase YjcD	fig|227866.17.peg.1495
DNA Metabolism	DNA repair	DNA repair, bacterial UvrD and related helicases	ATP-dependent DNA helicase UvrD/PcrA	fig|227866.17.peg.3921
DNA Metabolism	DNA Metabolism - no subcategory	DNA ligases	Ku domain protein	fig|227866.17.peg.1204
DNA Metabolism	DNA Metabolism - no subcategory	DNA ligases	ATP-dependent DNA ligase (EC 6.5.1.1) clustered with Ku protein, LigD	fig|227866.17.peg.1205, fig|227866.17.peg.1388
DNA Metabolism	DNA Metabolism - no subcategory	YcfH	Putative deoxyribonuclease YcfH	fig|227866.17.peg.4365
DNA Metabolism	DNA Metabolism - no subcategory	External and Outer Membrane Nucleases	Extracellular ribonuclease Bsn	fig|227866.17.peg.2787
DNA Metabolism	DNA Metabolism - no subcategory	DNA structural proteins, bacterial	Chromosome partition protein smc	fig|227866.17.peg.929
DNA Metabolism	DNA Metabolism - no subcategory	DNA structural proteins, bacterial	DNA-binding protein HBsu	fig|227866.17.peg.392
DNA Metabolism	DNA replication	DNA topoisomerases, Type I, ATP-independent	DNA topoisomerase III (EC 5.99.1.2)	fig|227866.17.peg.3142
DNA Metabolism	DNA replication	DNA topoisomerases, Type I, ATP-independent	DNA topoisomerase I (EC 5.99.1.2)	fig|227866.17.peg.911
DNA Metabolism	DNA replication	DNA replication strays	Probable 5'-3' exonuclease Bsu YpcP	fig|227866.17.peg.473
DNA Metabolism	DNA replication	DNA-replication	DNA primase (EC 2.7.7.-)	fig|227866.17.peg.134, fig|227866.17.peg.1480
DNA Metabolism	DNA replication	DNA-replication	ATP-dependent DNA helicase RecG (EC 3.6.1.-)	fig|227866.17.peg.936
DNA Metabolism	DNA replication	DNA-replication	Helicase loader DnaI	fig|227866.17.peg.3638
DNA Metabolism	DNA replication	DNA-replication	Recombination protein RecR	fig|227866.17.peg.4388
DNA Metabolism	DNA replication	DNA-replication	DNA polymerase III delta subunit (EC 2.7.7.7)	fig|227866.17.peg.98
DNA Metabolism	DNA replication	DNA-replication	DNA polymerase III alpha subunit (EC 2.7.7.7)	fig|227866.17.peg.864, fig|227866.17.peg.3665
DNA Metabolism	DNA replication	DNA-replication	Transcription-repair coupling factor	fig|227866.17.peg.4348
DNA Metabolism	DNA replication	DNA-replication	Holliday junction DNA helicase RuvA	fig|227866.17.peg.3502
DNA Metabolism	DNA replication	DNA-replication	DNA replication protein DnaC	fig|227866.17.peg.16, fig|227866.17.peg.1302
DNA Metabolism	DNA replication	DNA-replication	ATP-dependent DNA helicase RecQ	fig|227866.17.peg.578
DNA Metabolism	DNA replication	DNA-replication	Single-stranded-DNA-specific exonuclease RecJ (EC 3.1.-.-)	fig|227866.17.peg.3488
DNA Metabolism	DNA replication	DNA-replication	DNA polymerase III delta prime subunit (EC 2.7.7.7)	fig|227866.17.peg.4373
DNA Metabolism	DNA replication	DNA-replication	DNA polymerase I (EC 2.7.7.7)	fig|227866.17.peg.1483, fig|227866.17.peg.3649
DNA Metabolism	DNA replication	DNA-replication	DNA repair protein RecN	fig|227866.17.peg.236
DNA Metabolism	DNA replication	DNA-replication	Chromosomal replication initiator protein DnaA	fig|227866.17.peg.1866
DNA Metabolism	DNA replication	DNA-replication	Replicative DNA helicase (DnaB) (EC 3.6.4.12)	fig|227866.17.peg.1921
DNA Metabolism	DNA replication	DNA-replication	DNA polymerase III subunits gamma and tau (EC 2.7.7.7)	fig|227866.17.peg.4390
DNA Metabolism	DNA replication	DNA-replication	DNA polymerase III beta subunit (EC 2.7.7.7)	fig|227866.17.peg.1865
DNA Metabolism	DNA replication	DNA-replication	Helicase PriA essential for oriC/DnaA-independent DNA replication	fig|227866.17.peg.951
DNA Metabolism	DNA replication	DNA-replication	RecA protein	fig|227866.17.peg.829, fig|227866.17.peg.1399
DNA Metabolism	DNA replication	DNA-replication	Holliday junction DNA helicase RuvB	fig|227866.17.peg.3501
DNA Metabolism	DNA replication	DNA topoisomerases, Type II, ATP-dependent	DNA gyrase subunit B (EC 5.99.1.3)	fig|227866.17.peg.1861
DNA Metabolism	DNA replication	DNA topoisomerases, Type II, ATP-dependent	DNA gyrase subunit A (EC 5.99.1.3)	fig|227866.17.peg.1859
DNA Metabolism	DNA replication	DNA topoisomerases, Type II, ATP-dependent	Topoisomerase IV subunit B (EC 5.99.1.-)	fig|227866.17.peg.699
DNA Metabolism	DNA replication	DNA topoisomerases, Type II, ATP-dependent	Topoisomerase IV subunit A (EC 5.99.1.-)	fig|227866.17.peg.698
DNA Metabolism	DNA uptake, competence	DNA processing cluster	FIG000557: hypothetical protein co-occurring with RecR	fig|227866.17.peg.4389
DNA Metabolism	DNA uptake, competence	DNA processing cluster	Recombination protein RecR	fig|227866.17.peg.4388
DNA Metabolism	DNA uptake, competence	DNA processing cluster	Inhibitor of pro-sigmaK processing BofA	fig|227866.17.peg.4386
DNA Metabolism	DNA uptake, competence	DNA processing cluster	FIG015094: hypothetical protein	fig|227866.17.peg.4387
DNA Metabolism	DNA uptake, competence	DNA processing cluster	DNA topoisomerase III (EC 5.99.1.2)	fig|227866.17.peg.3142
DNA Metabolism	DNA uptake, competence	DNA processing cluster	DNA polymerase III subunits gamma and tau (EC 2.7.7.7)	fig|227866.17.peg.4390
DNA Metabolism	DNA uptake, competence	Gram Positive Competence	Negative regulator of genetic competence MecA	fig|227866.17.peg.371, fig|227866.17.peg.1529
DNA Metabolism	DNA uptake, competence	Gram Positive Competence	ComF operon protein A, DNA transporter ATPase	fig|227866.17.peg.2467
DNA Metabolism	DNA uptake, competence	Gram Positive Competence	Late competence protein ComEC, DNA transport	fig|227866.17.peg.95
DNA Metabolism	DNA uptake, competence	Gram Positive Competence	ComF operon protein C	fig|227866.17.peg.2469
DNA Metabolism	DNA uptake, competence	Gram Positive Competence	Late competence protein ComGA, access of DNA to ComEA	fig|227866.17.peg.186
DNA Metabolism	DNA uptake, competence	Gram Positive Competence	Late competence protein ComGB, access of DNA to ComEA	fig|227866.17.peg.187
DNA Metabolism	DNA uptake, competence	Gram Positive Competence	Late competence protein ComEA, DNA receptor	fig|227866.17.peg.93
DNA Metabolism	DNA uptake, competence	Gram Positive Competence	Late competence protein ComC, processing protease	fig|227866.17.peg.3537
DNA Metabolism	DNA uptake, competence	Gram Positive Competence	Competence protein CoiA	fig|227866.17.peg.1528
Fatty Acids, Lipids, and Isoprenoids	Phospholipids	Cardiolipin synthesis	Cardiolipin synthetase (EC 2.7.8.-)	fig|227866.17.peg.2272, fig|227866.17.peg.2277, fig|227866.17.peg.2345
Fatty Acids, Lipids, and Isoprenoids	Phospholipids	Glycerolipid and Glycerophospholipid Metabolism in Bacteria	Alcohol dehydrogenase (EC 1.1.1.1)	fig|227866.17.peg.665, fig|227866.17.peg.2948, fig|227866.17.peg.4202
Fatty Acids, Lipids, and Isoprenoids	Phospholipids	Glycerolipid and Glycerophospholipid Metabolism in Bacteria	Acyl-phosphate:glycerol-3-phosphate O-acyltransferase PlsY	fig|227866.17.peg.702
Fatty Acids, Lipids, and Isoprenoids	Phospholipids	Glycerolipid and Glycerophospholipid Metabolism in Bacteria	CDP-diacylglycerol--serine O-phosphatidyltransferase (EC 2.7.8.8)	fig|227866.17.peg.3357
Fatty Acids, Lipids, and Isoprenoids	Phospholipids	Glycerolipid and Glycerophospholipid Metabolism in Bacteria	Glycerol-3-phosphate dehydrogenase [NAD(P)+] (EC 1.1.1.94)	fig|227866.17.peg.387
Fatty Acids, Lipids, and Isoprenoids	Phospholipids	Glycerolipid and Glycerophospholipid Metabolism in Bacteria	Glycerol kinase (EC 2.7.1.30)	fig|227866.17.peg.1764
Fatty Acids, Lipids, and Isoprenoids	Phospholipids	Glycerolipid and Glycerophospholipid Metabolism in Bacteria	Phosphatidylserine decarboxylase (EC 4.1.1.65)	fig|227866.17.peg.3355
Fatty Acids, Lipids, and Isoprenoids	Phospholipids	Glycerolipid and Glycerophospholipid Metabolism in Bacteria	Aldehyde dehydrogenase (EC 1.2.1.3)	fig|227866.17.peg.566, fig|227866.17.peg.1978, fig|227866.17.peg.2095, fig|227866.17.peg.2196, fig|227866.17.peg.3994
Fatty Acids, Lipids, and Isoprenoids	Phospholipids	Glycerolipid and Glycerophospholipid Metabolism in Bacteria	Glycerol-1-phosphate dehydrogenase [NAD(P)] (EC 1.1.1.261)	fig|227866.17.peg.3615
Fatty Acids, Lipids, and Isoprenoids	Phospholipids	Glycerolipid and Glycerophospholipid Metabolism in Bacteria	1-acyl-sn-glycerol-3-phosphate acyltransferase (EC 2.3.1.51)	fig|227866.17.peg.1739
Fatty Acids, Lipids, and Isoprenoids	Phospholipids	Glycerolipid and Glycerophospholipid Metabolism in Bacteria	Diacylglycerol kinase (EC 2.7.1.107)	fig|227866.17.peg.123
Fatty Acids, Lipids, and Isoprenoids	Phospholipids	Glycerolipid and Glycerophospholipid Metabolism in Bacteria	CDP-diacylglycerol--glycerol-3-phosphate 3-phosphatidyltransferase (EC 2.7.8.5)	fig|227866.17.peg.831
Fatty Acids, Lipids, and Isoprenoids	Phospholipids	Glycerolipid and Glycerophospholipid Metabolism in Bacteria	Cardiolipin synthetase (EC 2.7.8.-)	fig|227866.17.peg.2272, fig|227866.17.peg.2277, fig|227866.17.peg.2345
Fatty Acids, Lipids, and Isoprenoids	Phospholipids	Glycerolipid and Glycerophospholipid Metabolism in Bacteria	Dihydroxyacetone kinase family protein	fig|227866.17.peg.939
Fatty Acids, Lipids, and Isoprenoids	Phospholipids	Glycerolipid and Glycerophospholipid Metabolism in Bacteria	Aerobic glycerol-3-phosphate dehydrogenase (EC 1.1.5.3)	fig|227866.17.peg.1763
Fatty Acids, Lipids, and Isoprenoids	Phospholipids	Glycerolipid and Glycerophospholipid Metabolism in Bacteria	Acyl carrier protein	fig|227866.17.peg.809, fig|227866.17.peg.931
Fatty Acids, Lipids, and Isoprenoids	Phospholipids	Glycerolipid and Glycerophospholipid Metabolism in Bacteria	Phosphatidate cytidylyltransferase (EC 2.7.7.41)	fig|227866.17.peg.868
Fatty Acids, Lipids, and Isoprenoids	Phospholipids	Glycerolipid and Glycerophospholipid Metabolism in Bacteria	Phosphate:acyl-ACP acyltransferase PlsX	fig|227866.17.peg.934, fig|227866.17.peg.935
Fatty Acids, Lipids, and Isoprenoids	Phospholipids	Glycerolipid and Glycerophospholipid Metabolism in Bacteria	Glycerate kinase (EC 2.7.1.31)	fig|227866.17.peg.478, fig|227866.17.peg.1965
Fatty Acids, Lipids, and Isoprenoids	Triacylglycerols	Triacylglycerol metabolism	Monoglyceride lipase (EC 3.1.1.23)	fig|227866.17.peg.3789
Fatty Acids, Lipids, and Isoprenoids	Triacylglycerols	Triacylglycerol metabolism	Lysophospholipase (EC 3.1.1.5)	fig|227866.17.peg.3789
Fatty Acids, Lipids, and Isoprenoids	Fatty acids	Fatty Acid Biosynthesis FASII	3-oxoacyl-[acyl-carrier protein] reductase (EC 1.1.1.100)	fig|227866.17.peg.657, fig|227866.17.peg.932, fig|227866.17.peg.1164, fig|227866.17.peg.2223, fig|227866.17.peg.2712, fig|227866.17.peg.2745, fig|227866.17.peg.3674
Fatty Acids, Lipids, and Isoprenoids	Fatty acids	Fatty Acid Biosynthesis FASII	Acetyl-coenzyme A carboxyl transferase alpha chain (EC 6.4.1.2)	fig|227866.17.peg.272, fig|227866.17.peg.3662
Fatty Acids, Lipids, and Isoprenoids	Fatty acids	Fatty Acid Biosynthesis FASII	Enoyl-[acyl-carrier-protein] reductase [NADH] (EC 1.3.1.9)	fig|227866.17.peg.1508
Fatty Acids, Lipids, and Isoprenoids	Fatty acids	Fatty Acid Biosynthesis FASII	Holo-[acyl-carrier protein] synthase (EC 2.7.8.7)	fig|227866.17.peg.3104
Fatty Acids, Lipids, and Isoprenoids	Fatty acids	Fatty Acid Biosynthesis FASII	Biotin carboxyl carrier protein of acetyl-CoA carboxylase	fig|227866.17.peg.224
Fatty Acids, Lipids, and Isoprenoids	Fatty acids	Fatty Acid Biosynthesis FASII	Biotin carboxylase of acetyl-CoA carboxylase (EC 6.3.4.14)	fig|227866.17.peg.225
Fatty Acids, Lipids, and Isoprenoids	Fatty acids	Fatty Acid Biosynthesis FASII	4'-phosphopantetheinyl transferase (EC 2.7.8.-)	fig|227866.17.peg.3220
Fatty Acids, Lipids, and Isoprenoids	Fatty acids	Fatty Acid Biosynthesis FASII	Acetyl-coenzyme A carboxyl transferase beta chain (EC 6.4.1.2)	fig|227866.17.peg.272, fig|227866.17.peg.3663
Fatty Acids, Lipids, and Isoprenoids	Fatty acids	Fatty Acid Biosynthesis FASII	Acyl carrier protein	fig|227866.17.peg.809, fig|227866.17.peg.931
Fatty Acids, Lipids, and Isoprenoids	Fatty acids	Fatty Acid Biosynthesis FASII	Malonyl CoA-acyl carrier protein transacylase (EC 2.3.1.39)	fig|227866.17.peg.801, fig|227866.17.peg.810, fig|227866.17.peg.811, fig|227866.17.peg.813, fig|227866.17.peg.933
Fatty Acids, Lipids, and Isoprenoids	Fatty acids	Fatty Acid Biosynthesis FASII	Enoyl-[acyl-carrier-protein] reductase [NADPH] (EC 1.3.1.10)	fig|227866.17.peg.4124
Fatty Acids, Lipids, and Isoprenoids	Fatty acids	Fatty Acid Biosynthesis FASII	3-hydroxyacyl-[acyl-carrier-protein] dehydratase, FabZ form (EC 4.2.1.59)	fig|227866.17.peg.2368, fig|227866.17.peg.3167
Fatty Acids, Lipids, and Isoprenoids	Fatty acids	Fatty Acid Biosynthesis FASII	Enoyl-[acyl-carrier-protein] reductase [FMN] (EC 1.3.1.9)	fig|227866.17.peg.810, fig|227866.17.peg.4181
Fatty Acids, Lipids, and Isoprenoids	Fatty acids	Fatty acid metabolism cluster	Long-chain-fatty-acid--CoA ligase (EC 6.2.1.3)	fig|227866.17.peg.680, fig|227866.17.peg.3151, fig|227866.17.peg.3594
Fatty Acids, Lipids, and Isoprenoids	Fatty acids	Fatty acid metabolism cluster	Enoyl-CoA hydratase (EC 4.2.1.17)	fig|227866.17.peg.805, fig|227866.17.peg.1707, fig|227866.17.peg.1857, fig|227866.17.peg.3592
Fatty Acids, Lipids, and Isoprenoids	Fatty acids	Fatty acid metabolism cluster	3-ketoacyl-CoA thiolase (EC 2.3.1.16)	fig|227866.17.peg.1655, fig|227866.17.peg.2754
Fatty Acids, Lipids, and Isoprenoids	Fatty acids	Fatty acid metabolism cluster	3-hydroxyacyl-CoA dehydrogenase (EC 1.1.1.35)	fig|227866.17.peg.2753
Fatty Acids, Lipids, and Isoprenoids	Fatty Acids, Lipids, and Isoprenoids - no subcategory	Polyhydroxybutyrate metabolism	Acetyl-CoA acetyltransferase (EC 2.3.1.9)	fig|227866.17.peg.1655, fig|227866.17.peg.2754
Fatty Acids, Lipids, and Isoprenoids	Fatty Acids, Lipids, and Isoprenoids - no subcategory	Polyhydroxybutyrate metabolism	D-beta-hydroxybutyrate dehydrogenase (EC 1.1.1.30)	fig|227866.17.peg.2079
Fatty Acids, Lipids, and Isoprenoids	Fatty Acids, Lipids, and Isoprenoids - no subcategory	Polyhydroxybutyrate metabolism	D-beta-hydroxybutyrate permease	fig|227866.17.peg.2076
Fatty Acids, Lipids, and Isoprenoids	Fatty Acids, Lipids, and Isoprenoids - no subcategory	Polyhydroxybutyrate metabolism	Butyrate-acetoacetate CoA-transferase subunit B (EC 2.8.3.9)	fig|227866.17.peg.2078
Fatty Acids, Lipids, and Isoprenoids	Fatty Acids, Lipids, and Isoprenoids - no subcategory	Polyhydroxybutyrate metabolism	Enoyl-CoA hydratase (EC 4.2.1.17)	fig|227866.17.peg.805, fig|227866.17.peg.1707, fig|227866.17.peg.1857, fig|227866.17.peg.3592
Fatty Acids, Lipids, and Isoprenoids	Fatty Acids, Lipids, and Isoprenoids - no subcategory	Polyhydroxybutyrate metabolism	3-ketoacyl-CoA thiolase (EC 2.3.1.16)	fig|227866.17.peg.1655, fig|227866.17.peg.2754
Fatty Acids, Lipids, and Isoprenoids	Fatty Acids, Lipids, and Isoprenoids - no subcategory	Polyhydroxybutyrate metabolism	3-hydroxyacyl-CoA dehydrogenase (EC 1.1.1.35)	fig|227866.17.peg.2753
Fatty Acids, Lipids, and Isoprenoids	Fatty Acids, Lipids, and Isoprenoids - no subcategory	Polyhydroxybutyrate metabolism	3-hydroxybutyryl-CoA dehydrogenase (EC 1.1.1.157)	fig|227866.17.peg.247
Fatty Acids, Lipids, and Isoprenoids	Fatty Acids, Lipids, and Isoprenoids - no subcategory	Hopanes	Squalene--hopene cyclase (EC 5.4.99.17)	fig|227866.17.peg.565
Fatty Acids, Lipids, and Isoprenoids	Isoprenoids	Isoprenoinds for Quinones	Undecaprenyl diphosphate synthase (EC 2.5.1.31)	fig|227866.17.peg.869
Fatty Acids, Lipids, and Isoprenoids	Isoprenoids	Isoprenoinds for Quinones	Heptaprenyl diphosphate synthase component II (EC 2.5.1.30)	fig|227866.17.peg.397
Fatty Acids, Lipids, and Isoprenoids	Isoprenoids	Isoprenoinds for Quinones	Heptaprenyl diphosphate synthase component I (EC 2.5.1.30)	fig|227866.17.peg.395
Fatty Acids, Lipids, and Isoprenoids	Isoprenoids	Isoprenoinds for Quinones	(2E,6E)-farnesyl diphosphate synthase (EC 2.5.1.10)	fig|227866.17.peg.231
Fatty Acids, Lipids, and Isoprenoids	Isoprenoids	Isoprenoid Biosynthesis	Isopentenyl-diphosphate delta-isomerase, FMN-dependent (EC 5.3.3.2)	fig|227866.17.peg.381
Fatty Acids, Lipids, and Isoprenoids	Isoprenoids	Isoprenoid Biosynthesis	4-hydroxy-3-methylbut-2-enyl diphosphate reductase (EC 1.17.1.2)	fig|227866.17.peg.140
Fatty Acids, Lipids, and Isoprenoids	Isoprenoids	Isoprenoid Biosynthesis	4-diphosphocytidyl-2-C-methyl-D-erythritol kinase (EC 2.7.1.148)	fig|227866.17.peg.4358
Fatty Acids, Lipids, and Isoprenoids	Isoprenoids	Isoprenoid Biosynthesis	2-C-methyl-D-erythritol 2,4-cyclodiphosphate synthase (EC 4.6.1.12)	fig|227866.17.peg.4247
Fatty Acids, Lipids, and Isoprenoids	Isoprenoids	Isoprenoid Biosynthesis	Acetyl-CoA acetyltransferase (EC 2.3.1.9)	fig|227866.17.peg.1655, fig|227866.17.peg.2754
Fatty Acids, Lipids, and Isoprenoids	Isoprenoids	Isoprenoid Biosynthesis	1-deoxy-D-xylulose 5-phosphate synthase (EC 2.2.1.7)	fig|227866.17.peg.233
Fatty Acids, Lipids, and Isoprenoids	Isoprenoids	Isoprenoid Biosynthesis	1-deoxy-D-xylulose 5-phosphate reductoisomerase (EC 1.1.1.267)	fig|227866.17.peg.867
Fatty Acids, Lipids, and Isoprenoids	Isoprenoids	Isoprenoid Biosynthesis	Undecaprenyl diphosphate synthase (EC 2.5.1.31)	fig|227866.17.peg.869
Fatty Acids, Lipids, and Isoprenoids	Isoprenoids	Isoprenoid Biosynthesis	1-hydroxy-2-methyl-2-(E)-butenyl 4-diphosphate synthase (EC 1.17.7.1)	fig|227866.17.peg.149
Fatty Acids, Lipids, and Isoprenoids	Isoprenoids	Isoprenoid Biosynthesis	Hydroxymethylglutaryl-CoA synthase (EC 2.3.3.10)	fig|227866.17.peg.807
Fatty Acids, Lipids, and Isoprenoids	Isoprenoids	Isoprenoid Biosynthesis	(2E,6E)-farnesyl diphosphate synthase (EC 2.5.1.10)	fig|227866.17.peg.231
Fatty Acids, Lipids, and Isoprenoids	Isoprenoids	Isoprenoid Biosynthesis	2-C-methyl-D-erythritol 4-phosphate cytidylyltransferase (EC 2.7.7.60)	fig|227866.17.peg.4246
Fatty Acids, Lipids, and Isoprenoids	Isoprenoids	Polyprenyl Diphosphate Biosynthesis	Undecaprenyl diphosphate synthase (EC 2.5.1.31)	fig|227866.17.peg.869
Fatty Acids, Lipids, and Isoprenoids	Isoprenoids	Polyprenyl Diphosphate Biosynthesis	Heptaprenyl diphosphate synthase component II (EC 2.5.1.30)	fig|227866.17.peg.397
Fatty Acids, Lipids, and Isoprenoids	Isoprenoids	Polyprenyl Diphosphate Biosynthesis	Heptaprenyl diphosphate synthase component I (EC 2.5.1.30)	fig|227866.17.peg.395
Fatty Acids, Lipids, and Isoprenoids	Isoprenoids	Polyprenyl Diphosphate Biosynthesis	(2E,6E)-farnesyl diphosphate synthase (EC 2.5.1.10)	fig|227866.17.peg.231
Fatty Acids, Lipids, and Isoprenoids	Isoprenoids	Nonmevalonate Branch of Isoprenoid Biosynthesis	1-deoxy-D-xylulose 5-phosphate reductoisomerase (EC 1.1.1.267)	fig|227866.17.peg.867
Fatty Acids, Lipids, and Isoprenoids	Isoprenoids	Nonmevalonate Branch of Isoprenoid Biosynthesis	4-hydroxy-3-methylbut-2-enyl diphosphate reductase (EC 1.17.1.2)	fig|227866.17.peg.140
Fatty Acids, Lipids, and Isoprenoids	Isoprenoids	Nonmevalonate Branch of Isoprenoid Biosynthesis	1-hydroxy-2-methyl-2-(E)-butenyl 4-diphosphate synthase (EC 1.17.7.1)	fig|227866.17.peg.149
Fatty Acids, Lipids, and Isoprenoids	Isoprenoids	Nonmevalonate Branch of Isoprenoid Biosynthesis	4-diphosphocytidyl-2-C-methyl-D-erythritol kinase (EC 2.7.1.148)	fig|227866.17.peg.4358
Fatty Acids, Lipids, and Isoprenoids	Isoprenoids	Nonmevalonate Branch of Isoprenoid Biosynthesis	2-C-methyl-D-erythritol 2,4-cyclodiphosphate synthase (EC 4.6.1.12)	fig|227866.17.peg.4247
Fatty Acids, Lipids, and Isoprenoids	Isoprenoids	Nonmevalonate Branch of Isoprenoid Biosynthesis	2-C-methyl-D-erythritol 4-phosphate cytidylyltransferase (EC 2.7.7.60)	fig|227866.17.peg.4246
Fatty Acids, Lipids, and Isoprenoids	Isoprenoids	Nonmevalonate Branch of Isoprenoid Biosynthesis	1-deoxy-D-xylulose 5-phosphate synthase (EC 2.2.1.7)	fig|227866.17.peg.233
Fatty Acids, Lipids, and Isoprenoids	Isoprenoids	Isoprenoid Biosynthesis: Interconversions	Isopentenyl-diphosphate delta-isomerase, FMN-dependent (EC 5.3.3.2)	fig|227866.17.peg.381
Fatty Acids, Lipids, and Isoprenoids	Isoprenoids	Isoprenoid Biosynthesis: Interconversions	(2E,6E)-farnesyl diphosphate synthase (EC 2.5.1.10)	fig|227866.17.peg.231
Nitrogen Metabolism	Nitrogen Metabolism - no subcategory	Nitric oxide synthase	Manganese superoxide dismutase (EC 1.15.1.1)	fig|227866.17.peg.153
Nitrogen Metabolism	Nitrogen Metabolism - no subcategory	Nitric oxide synthase	putative cytochrome P450 hydroxylase	fig|227866.17.peg.799, fig|227866.17.peg.1340, fig|227866.17.peg.3754, fig|227866.17.peg.4176
Nitrogen Metabolism	Nitrogen Metabolism - no subcategory	Nitric oxide synthase	Nitric oxide synthase oxygenase (EC 1.-.-.-)	fig|227866.17.peg.4024
Nitrogen Metabolism	Nitrogen Metabolism - no subcategory	Nitrosative stress	Nitrite-sensitive transcriptional repressor NsrR	fig|227866.17.peg.1755
Nitrogen Metabolism	Nitrogen Metabolism - no subcategory	Nitrate and nitrite ammonification	Respiratory nitrate reductase alpha chain (EC 1.7.99.4)	fig|227866.17.peg.2268
Nitrogen Metabolism	Nitrogen Metabolism - no subcategory	Nitrate and nitrite ammonification	Nitrate/nitrite transporter	fig|227866.17.peg.2264, fig|227866.17.peg.3246
Nitrogen Metabolism	Nitrogen Metabolism - no subcategory	Nitrate and nitrite ammonification	Assimilatory nitrate reductase large subunit (EC:1.7.99.4)	fig|227866.17.peg.3248
Nitrogen Metabolism	Nitrogen Metabolism - no subcategory	Nitrate and nitrite ammonification	Respiratory nitrate reductase gamma chain (EC 1.7.99.4)	fig|227866.17.peg.2271
Nitrogen Metabolism	Nitrogen Metabolism - no subcategory	Nitrate and nitrite ammonification	Respiratory nitrate reductase beta chain (EC 1.7.99.4)	fig|227866.17.peg.2269
Nitrogen Metabolism	Nitrogen Metabolism - no subcategory	Nitrate and nitrite ammonification	Respiratory nitrate reductase delta chain (EC 1.7.99.4)	fig|227866.17.peg.2270
Nitrogen Metabolism	Nitrogen Metabolism - no subcategory	Nitrate and nitrite ammonification	Nitrate/nitrite sensor protein (EC 2.7.3.-)	fig|227866.17.peg.1761
Nitrogen Metabolism	Nitrogen Metabolism - no subcategory	Nitrate and nitrite ammonification	Nitrite reductase [NAD(P)H] large subunit (EC 1.7.1.4)	fig|227866.17.peg.3247, fig|227866.17.peg.3249
Nitrogen Metabolism	Nitrogen Metabolism - no subcategory	Nitrate and nitrite ammonification	Nitrite reductase [NAD(P)H] small subunit (EC 1.7.1.4)	fig|227866.17.peg.3250
Nitrogen Metabolism	Nitrogen Metabolism - no subcategory	Ammonia assimilation	Glutamine synthetase type I (EC 6.3.1.2)	fig|227866.17.peg.772
Nitrogen Metabolism	Nitrogen Metabolism - no subcategory	Ammonia assimilation	Glutamate synthase [NADPH] small chain (EC 1.4.1.13)	fig|227866.17.peg.664
Nitrogen Metabolism	Nitrogen Metabolism - no subcategory	Ammonia assimilation	Ferredoxin-dependent glutamate synthase (EC 1.4.7.1)	fig|227866.17.peg.3918
Nitrogen Metabolism	Nitrogen Metabolism - no subcategory	Ammonia assimilation	Nitrogen regulatory protein P-II	fig|227866.17.peg.124, fig|227866.17.peg.2354
Nitrogen Metabolism	Nitrogen Metabolism - no subcategory	Ammonia assimilation	Nitrogen regulation protein NR(I)	fig|227866.17.peg.496
Nitrogen Metabolism	Nitrogen Metabolism - no subcategory	Ammonia assimilation	Ammonium transporter	fig|227866.17.peg.2355
Nitrogen Metabolism	Nitrogen Metabolism - no subcategory	Ammonia assimilation	Glutamate synthase [NADPH] large chain (EC 1.4.1.13)	fig|227866.17.peg.663
Nitrogen Metabolism	Denitrification	Denitrifying reductase gene clusters	Nitric oxide reductase activation protein NorD	fig|227866.17.peg.559
Nitrogen Metabolism	Denitrification	Denitrifying reductase gene clusters	Respiratory nitrate reductase alpha chain (EC 1.7.99.4)	fig|227866.17.peg.2268
Nitrogen Metabolism	Denitrification	Denitrifying reductase gene clusters	Respiratory nitrate reductase gamma chain (EC 1.7.99.4)	fig|227866.17.peg.2271
Nitrogen Metabolism	Denitrification	Denitrifying reductase gene clusters	Respiratory nitrate reductase delta chain (EC 1.7.99.4)	fig|227866.17.peg.2270
Nitrogen Metabolism	Denitrification	Denitrifying reductase gene clusters	Respiratory nitrate reductase beta chain (EC 1.7.99.4)	fig|227866.17.peg.2269
Nitrogen Metabolism	Denitrification	Denitrifying reductase gene clusters	Nitric oxide reductase activation protein NorQ	fig|227866.17.peg.558
Dormancy and Sporulation	Spore DNA protection	Dipicolinate Synthesis	Dipicolinate synthase subunit A (EC 4.2.1.52)	fig|227866.17.peg.849
Dormancy and Sporulation	Spore DNA protection	Dipicolinate Synthesis	Dipicolinate synthase subunit B	fig|227866.17.peg.848
Dormancy and Sporulation	Spore DNA protection	Small acid-soluble spore proteins	Small acid-soluble spore protein, gamma-type SASP	fig|227866.17.peg.4125
Dormancy and Sporulation	Spore DNA protection	Small acid-soluble spore proteins	Small acid-soluble spore protein, alpha/beta family, SASP_6	fig|227866.17.peg.1197
Dormancy and Sporulation	Spore DNA protection	Small acid-soluble spore proteins	Small acid-soluble spore protein, alpha/beta family, SASP_1	fig|227866.17.peg.1719, fig|227866.17.peg.3691
Dormancy and Sporulation	Spore DNA protection	Small acid-soluble spore proteins	Endopeptidase spore protease Gpr (EC 3.4.24.78)	fig|227866.17.peg.100
Dormancy and Sporulation	Dormancy and Sporulation - no subcategory	Spore Core Dehydration	Spore maturation protein B	fig|227866.17.peg.351
Dormancy and Sporulation	Dormancy and Sporulation - no subcategory	Spore Core Dehydration	Spore maturation protein A	fig|227866.17.peg.350
Dormancy and Sporulation	Dormancy and Sporulation - no subcategory	Spore germination	Spore germination protein YpeB	fig|227866.17.peg.376
Dormancy and Sporulation	Dormancy and Sporulation - no subcategory	Spore germination	Protein GerPE, required for proper assembly of spore coat, mutations lead to super-dormant spore	fig|227866.17.peg.1620
Dormancy and Sporulation	Dormancy and Sporulation - no subcategory	Spore germination	Protein GerPD, required for proper assembly of spore coat, mutations lead to super-dormant spore	fig|227866.17.peg.1619
Dormancy and Sporulation	Dormancy and Sporulation - no subcategory	Spore germination	Protein GerPA, required for proper assembly of spore coat, mutations lead to super-dormant spore	fig|227866.17.peg.1616
Dormancy and Sporulation	Dormancy and Sporulation - no subcategory	Spore germination	Protein GerPC, required for proper assembly of spore coat, mutations lead to super-dormant spore	fig|227866.17.peg.1618
Dormancy and Sporulation	Dormancy and Sporulation - no subcategory	Spore germination	Uncharacterized spore germination protein YndF	fig|227866.17.peg.736
Dormancy and Sporulation	Dormancy and Sporulation - no subcategory	Spore germination	Similar to proteins GerPF and GerPA	fig|227866.17.peg.2866
Dormancy and Sporulation	Dormancy and Sporulation - no subcategory	Spore germination	Germination-specific N-acetylmuramoyl-L-alanine amidase (EC 3.5.1.28), cell wall hydrolase CwlD	fig|227866.17.peg.4310
Dormancy and Sporulation	Dormancy and Sporulation - no subcategory	Spore germination	Spore germination protein GerKA	fig|227866.17.peg.2427, fig|227866.17.peg.3205, fig|227866.17.peg.4038
Dormancy and Sporulation	Dormancy and Sporulation - no subcategory	Spore germination	Spore germination protein GerAB, germination response to L-alanine and related amino acids (earliest stage)	fig|227866.17.peg.2728
Dormancy and Sporulation	Dormancy and Sporulation - no subcategory	Spore germination	Spo0E-like putative sporulation regulatory protein in grePA-PF operon	fig|227866.17.peg.1614
Dormancy and Sporulation	Dormancy and Sporulation - no subcategory	Spore germination	Spore germination protein GerAA, germination response to L-alanine and related amino acids (earliest stage)	fig|227866.17.peg.2729
Dormancy and Sporulation	Dormancy and Sporulation - no subcategory	Spore germination	Spore cortex-lytic enzyme CwlJ	fig|227866.17.peg.3321
Dormancy and Sporulation	Dormancy and Sporulation - no subcategory	Spore germination	Protein GerPB, required for proper assembly of spore coat, mutations lead to super-dormant spore	fig|227866.17.peg.1617
Dormancy and Sporulation	Dormancy and Sporulation - no subcategory	Spore germination	Uncharacterized spore germination protein YndE	fig|227866.17.peg.737
Dormancy and Sporulation	Dormancy and Sporulation - no subcategory	Spore germination	Spore cortex-lytic enzyme, N-acetylglucosaminidase SleL (EC 3.2.1.-)	fig|227866.17.peg.4393
Dormancy and Sporulation	Dormancy and Sporulation - no subcategory	Spore germination	Spore germination protein GerKC	fig|227866.17.peg.3204, fig|227866.17.peg.4037
Dormancy and Sporulation	Dormancy and Sporulation - no subcategory	Spore germination	Protein GerPF, required for proper assembly of spore coat, mutations lead to super-dormant spore	fig|227866.17.peg.1621
Dormancy and Sporulation	Dormancy and Sporulation - no subcategory	Spore germination	Spore protein YdhD, not involved in spore germination	fig|227866.17.peg.3006
Dormancy and Sporulation	Dormancy and Sporulation - no subcategory	Spore germination	Spore germination protein GerD	fig|227866.17.peg.4312
Dormancy and Sporulation	Dormancy and Sporulation - no subcategory	Spore germination	Spore cortex-lytic enzyme, lytic transglycosylase SleB	fig|227866.17.peg.375
Dormancy and Sporulation	Dormancy and Sporulation - no subcategory	Spore germination	Spore germination protein GerKB	fig|227866.17.peg.3203
Dormancy and Sporulation	Dormancy and Sporulation - no subcategory	Spore germination	Spore germination protein GerAC, germination response to L-alanine and related amino acids (earliest stage)	fig|227866.17.peg.2425, fig|227866.17.peg.2727
Dormancy and Sporulation	Dormancy and Sporulation - no subcategory	Spore germination	Putative peptidoglycan hydrolase YvbX, NOT involved in spore germination	fig|227866.17.peg.2615
Dormancy and Sporulation	Dormancy and Sporulation - no subcategory	Spore germination	Uncharacterized spore germination protein YndD	fig|227866.17.peg.738
Dormancy and Sporulation	Dormancy and Sporulation - no subcategory	Spore germination	Uncharacterized protein YkvT, NOT involved in spore germination	fig|227866.17.peg.1156
Dormancy and Sporulation	Dormancy and Sporulation - no subcategory	Persister Cells	Cell division inhibitor	fig|227866.17.peg.4110
Dormancy and Sporulation	Dormancy and Sporulation - no subcategory	Sporulation Cluster	RNA binding protein, contains ribosomal protein S1 domain	fig|227866.17.peg.4340
Dormancy and Sporulation	Dormancy and Sporulation - no subcategory	Sporulation Cluster	Stage II sporulation serine phosphatase for sigma-F activation (SpoIIE)	fig|227866.17.peg.4339
Dormancy and Sporulation	Dormancy and Sporulation - no subcategory	Sporulation Cluster	Cell division protein DivIC (FtsB), stabilizes FtsL against RasP cleavage	fig|227866.17.peg.4341
Dormancy and Sporulation	Dormancy and Sporulation - no subcategory	Sporulation Cluster	Transcription-repair coupling factor	fig|227866.17.peg.4348
Dormancy and Sporulation	Dormancy and Sporulation - no subcategory	Sporulation Cluster	possible tetrapyrrole methyltransferase domain	fig|227866.17.peg.4345
Dormancy and Sporulation	Dormancy and Sporulation - no subcategory	Sporulation Cluster	Stage II sporulation protein D (SpoIID)	fig|227866.17.peg.2324
Dormancy and Sporulation	Dormancy and Sporulation - no subcategory	Sporulation Cluster	Nucleoside triphosphate pyrophosphohydrolase MazG (EC 3.6.1.8)	fig|227866.17.peg.4345
Dormancy and Sporulation	Dormancy and Sporulation - no subcategory	Sporulation Cluster	FIG007421: forespore shell protein	fig|227866.17.peg.4343
Dormancy and Sporulation	Dormancy and Sporulation - no subcategory	Sporulation Cluster	Ribosome-associated heat shock protein implicated in the recycling of the 50S subunit (S4 paralog)	fig|227866.17.peg.4344
Dormancy and Sporulation	Dormancy and Sporulation - no subcategory	Sporulation Cluster	Stage V sporulation protein T, AbrB family transcriptional regulator (SpoVT)	fig|227866.17.peg.4347
Dormancy and Sporulation	Dormancy and Sporulation - no subcategory	Sporulation Cluster	Spore cortex biosynthesis protein	fig|227866.17.peg.4342
Dormancy and Sporulation	Dormancy and Sporulation - no subcategory	Bacillus biofilm matrix protein component TasA and homologs	Stationary phase secreted protein TasA, major protein component of biofilm matrix	fig|227866.17.peg.197
Dormancy and Sporulation	Dormancy and Sporulation - no subcategory	Bacillus biofilm matrix protein component TasA and homologs	SinR, regulator of post-exponential-phase responses genes (competence and sporulation)	fig|227866.17.peg.198
Dormancy and Sporulation	Dormancy and Sporulation - no subcategory	Bacillus biofilm matrix protein component TasA and homologs	YqxM protein, required for localization of TasA to extracellular matrix	fig|227866.17.peg.195
Dormancy and Sporulation	Dormancy and Sporulation - no subcategory	Bacillus biofilm matrix protein component TasA and homologs	Slr, positive regulator of the extracellular matrix biosynthesis operon yqxM-sipW-tasA	fig|227866.17.peg.2579
Dormancy and Sporulation	Dormancy and Sporulation - no subcategory	Bacillus biofilm matrix protein component TasA and homologs	Signal peptidase SipW (EC 3.4.21.89), required for TasA secretion	fig|227866.17.peg.196
Dormancy and Sporulation	Dormancy and Sporulation - no subcategory	Bacillus biofilm matrix protein component TasA and homologs	SinI protein, antagonist of SinR	fig|227866.17.peg.199
Dormancy and Sporulation	Dormancy and Sporulation - no subcategory	Sporulation gene orphans	RNA polymerase sporulation specific sigma factor SigE	fig|227866.17.peg.990
Dormancy and Sporulation	Dormancy and Sporulation - no subcategory	Sporulation gene orphans	Stage V sporulation protein whose disruption leads to the production of immature spores (SpoVK)	fig|227866.17.peg.776
Dormancy and Sporulation	Dormancy and Sporulation - no subcategory	Sporulation gene orphans	KapB, lipoprotein required for KinB pathway to sporulation	fig|227866.17.peg.2900
Dormancy and Sporulation	Dormancy and Sporulation - no subcategory	Sporulation gene orphans	Stage V sporulation protein AE (SpoVAE)	fig|227866.17.peg.329, fig|227866.17.peg.330
Dormancy and Sporulation	Dormancy and Sporulation - no subcategory	Sporulation gene orphans	Stage II sporulation protein D (SpoIID)	fig|227866.17.peg.2324
Dormancy and Sporulation	Dormancy and Sporulation - no subcategory	Sporulation gene orphans	Stage V sporulation protein AF (SpoVAF)	fig|227866.17.peg.331
Dormancy and Sporulation	Dormancy and Sporulation - no subcategory	Sporulation gene orphans	Stage V sporulation protein required for dehydratation of the spore core and assembly of the coat (SpoVS)	fig|227866.17.peg.825
Dormancy and Sporulation	Dormancy and Sporulation - no subcategory	Sporulation gene orphans	Stage V sporulation protein AD (SpoVAD)	fig|227866.17.peg.328
Dormancy and Sporulation	Dormancy and Sporulation - no subcategory	Sporulation gene orphans	Sporulation kinase B (EC 2.7.13.3)	fig|227866.17.peg.2901
Dormancy and Sporulation	Dormancy and Sporulation - no subcategory	Sporulation gene orphans	Stage IV sporulation protein B	fig|227866.17.peg.237
Dormancy and Sporulation	Dormancy and Sporulation - no subcategory	Sporulation gene orphans	Stage III sporulation protein D	fig|227866.17.peg.2363
Dormancy and Sporulation	Dormancy and Sporulation - no subcategory	Sporulation gene orphans	Stage VI sporulation protein D	fig|227866.17.peg.3543
Dormancy and Sporulation	Dormancy and Sporulation - no subcategory	Sporulation gene orphans	Stage IV sporulation protein FA (SpoIVFA)	fig|227866.17.peg.3528
Dormancy and Sporulation	Dormancy and Sporulation - no subcategory	Sporulation gene orphans	Stage III sporulation protein AF	fig|227866.17.peg.221
Dormancy and Sporulation	Dormancy and Sporulation - no subcategory	Sporulation gene orphans	Stage V sporulation protein AA (SpoVAA)	fig|227866.17.peg.325
Dormancy and Sporulation	Dormancy and Sporulation - no subcategory	Sporulation gene orphans	Stage V sporulation protein B	fig|227866.17.peg.1155, fig|227866.17.peg.3493, fig|227866.17.peg.4346
Dormancy and Sporulation	Dormancy and Sporulation - no subcategory	Sporulation gene orphans	Stage IV sporulation pro-sigma-K processing enzyme (SpoIVFB)	fig|227866.17.peg.3527
Dormancy and Sporulation	Dormancy and Sporulation - no subcategory	Sporulation gene orphans	KapD, inhibitor of KinA pathway to sporulation	fig|227866.17.peg.2899
Dormancy and Sporulation	Dormancy and Sporulation - no subcategory	Sporulation gene orphans	Stage III sporulation protein AB	fig|227866.17.peg.217
Dormancy and Sporulation	Dormancy and Sporulation - no subcategory	Sporulation gene orphans	Stage 0 sporulation two-component response regulator (Spo0A)	fig|227866.17.peg.239
Dormancy and Sporulation	Dormancy and Sporulation - no subcategory	Sporulation gene orphans	Stage V sporulation protein AB (SpoVAB)	fig|227866.17.peg.326
Dormancy and Sporulation	Dormancy and Sporulation - no subcategory	Sporulation gene orphans	Stage V sporulation protein E	fig|227866.17.peg.1002
Dormancy and Sporulation	Dormancy and Sporulation - no subcategory	Sporulation gene orphans	Sporulation initiation phosphotransferase (Spo0F)	fig|227866.17.peg.2284
Dormancy and Sporulation	Dormancy and Sporulation - no subcategory	Sporulation gene orphans	Stage III sporulation protein AA	fig|227866.17.peg.216
Dormancy and Sporulation	Dormancy and Sporulation - no subcategory	Sporulation gene orphans	Stage III sporulation protein AD	fig|227866.17.peg.219
Dormancy and Sporulation	Dormancy and Sporulation - no subcategory	Sporulation gene orphans	Sporulation kinase A (EC 2.7.13.3)	fig|227866.17.peg.1134
Dormancy and Sporulation	Dormancy and Sporulation - no subcategory	Sporulation gene orphans	Stage V sporulation protein D (Sporulation-specific penicillin-binding protein)	fig|227866.17.peg.1006
Dormancy and Sporulation	Dormancy and Sporulation - no subcategory	Sporulation gene orphans	Stage II sporulation protein M (SpoIIM)	fig|227866.17.peg.314
Dormancy and Sporulation	Dormancy and Sporulation - no subcategory	Sporulation gene orphans	Stage III sporulation protein AC	fig|227866.17.peg.218
Dormancy and Sporulation	Dormancy and Sporulation - no subcategory	Sporulation gene orphans	Stage V sporulation protein AC (SpoVAC)	fig|227866.17.peg.327
Dormancy and Sporulation	Dormancy and Sporulation - no subcategory	Sporulation gene orphans	Stage II sporulation protein B	fig|227866.17.peg.3536
Dormancy and Sporulation	Dormancy and Sporulation - no subcategory	Sporulation gene orphans	Sporulation initiation phosphotransferase B (Spo0B)	fig|227866.17.peg.3522
Dormancy and Sporulation	Dormancy and Sporulation - no subcategory	Sporulation gene orphans	Stage II sporulation protein P	fig|227866.17.peg.101
Dormancy and Sporulation	Dormancy and Sporulation - no subcategory	Sporulation gene orphans	Stage V sporulation protein T, AbrB family transcriptional regulator (SpoVT)	fig|227866.17.peg.4347
Dormancy and Sporulation	Dormancy and Sporulation - no subcategory	Sporulation gene orphans	Stage IV sporulation protein A	fig|227866.17.peg.390
Dormancy and Sporulation	Dormancy and Sporulation - no subcategory	Sporulation gene orphans	Stage V sporulation protein involved in spore cortex synthesis (SpoVR)	fig|227866.17.peg.1753
Dormancy and Sporulation	Dormancy and Sporulation - no subcategory	Sporulation gene orphans	Sporulation kinase C (EC 2.7.13.3)	fig|227866.17.peg.1084
Dormancy and Sporulation	Dormancy and Sporulation - no subcategory	Sporulation gene orphans	Stage II sporulation serine phosphatase for sigma-F activation (SpoIIE)	fig|227866.17.peg.4339
Dormancy and Sporulation	Dormancy and Sporulation - no subcategory	Sporulation gene orphans	Stage II sporulation protein related to metaloproteases (SpoIIQ)	fig|227866.17.peg.2351
Dormancy and Sporulation	Dormancy and Sporulation - no subcategory	Sporulation gene orphans	RNA polymerase sporulation specific sigma factor SigF	fig|227866.17.peg.324
Dormancy and Sporulation	Dormancy and Sporulation - no subcategory	Sporulation gene orphans	Stage II sporulation protein required for processing of pro-sigma-E (SpoIIR)	fig|227866.17.peg.2301
Dormancy and Sporulation	Dormancy and Sporulation - no subcategory	Sporulation gene orphans	Stage III sporulation protein AG	fig|227866.17.peg.222
Dormancy and Sporulation	Dormancy and Sporulation - no subcategory	Sporulation gene orphans	Sporulation sigma-E factor processing peptidase (SpoIIGA)	fig|227866.17.peg.991
Dormancy and Sporulation	Dormancy and Sporulation - no subcategory	Sporulation gene orphans	Stage III sporulation protein AE	fig|227866.17.peg.220
Dormancy and Sporulation	Dormancy and Sporulation - no subcategory	Sporulation gene orphans	Stage III sporulation protein AH	fig|227866.17.peg.223
Dormancy and Sporulation	Dormancy and Sporulation - no subcategory	Sporulation gene orphans	RNA polymerase sporulation specific sigma factor SigG	fig|227866.17.peg.989
Dormancy and Sporulation	Dormancy and Sporulation - no subcategory	Sporulation gene orphans	RNA polymerase sporulation specific sigma factor SigK	fig|227866.17.peg.4142
Dormancy and Sporulation	Dormancy and Sporulation - no subcategory	SpoVS protein family	Stage III sporulation protein AE	fig|227866.17.peg.220
Dormancy and Sporulation	Dormancy and Sporulation - no subcategory	SpoVS protein family	Stage V sporulation protein required for dehydratation of the spore core and assembly of the coat (SpoVS)	fig|227866.17.peg.825
Dormancy and Sporulation	Dormancy and Sporulation - no subcategory	Sporulation-associated proteins with broader functions	Stage III sporulation protein AE	fig|227866.17.peg.220
Dormancy and Sporulation	Dormancy and Sporulation - no subcategory	Sporulation-associated proteins with broader functions	Protein of unknown function identified by role in sporulation (SpoVG)	fig|227866.17.peg.4355
Dormancy and Sporulation	Dormancy and Sporulation - no subcategory	Sporulation-associated proteins with broader functions	Peptidyl-tRNA hydrolase (EC 3.1.1.29)	fig|227866.17.peg.4350
Dormancy and Sporulation	Dormancy and Sporulation - no subcategory	Sporulation-associated proteins with broader functions	RNA polymerase sporulation specific sigma factor SigH	fig|227866.17.peg.4255
Dormancy and Sporulation	Dormancy and Sporulation - no subcategory	Sporulation Cluster III A	Stage III sporulation protein AD	fig|227866.17.peg.219
Dormancy and Sporulation	Dormancy and Sporulation - no subcategory	Sporulation Cluster III A	Stage III sporulation protein AF	fig|227866.17.peg.221
Dormancy and Sporulation	Dormancy and Sporulation - no subcategory	Sporulation Cluster III A	Stage III sporulation protein AC	fig|227866.17.peg.218
Dormancy and Sporulation	Dormancy and Sporulation - no subcategory	Sporulation Cluster III A	Stage III sporulation protein AG	fig|227866.17.peg.222
Dormancy and Sporulation	Dormancy and Sporulation - no subcategory	Sporulation Cluster III A	Stage III sporulation protein AB	fig|227866.17.peg.217
Dormancy and Sporulation	Dormancy and Sporulation - no subcategory	Sporulation Cluster III A	Stage III sporulation protein AE	fig|227866.17.peg.220
Dormancy and Sporulation	Dormancy and Sporulation - no subcategory	Sporulation Cluster III A	Stage III sporulation protein AH	fig|227866.17.peg.223
Dormancy and Sporulation	Dormancy and Sporulation - no subcategory	Sporulation Cluster III A	Stage III sporulation protein AA	fig|227866.17.peg.216
Respiration	Electron accepting reactions	Ubiquinone Menaquinone-cytochrome c reductase complexes	Menaquinone-cytochrome c reductase, cytochrome B subunit	fig|227866.17.peg.417
Respiration	Electron accepting reactions	Ubiquinone Menaquinone-cytochrome c reductase complexes	Menaquinone-cytochrome C oxidoreductase, cytochrome C subunit	fig|227866.17.peg.418
Respiration	Electron accepting reactions	Ubiquinone Menaquinone-cytochrome c reductase complexes	Menaquinone-cytochrome C reductase iron-sulfur subunit	fig|227866.17.peg.416
Respiration	Electron accepting reactions	Terminal cytochrome d ubiquinol oxidases	Cytochrome d ubiquinol oxidase subunit I (EC 1.10.3.-)	fig|227866.17.peg.2105, fig|227866.17.peg.3809
Respiration	Electron accepting reactions	Terminal cytochrome d ubiquinol oxidases	Cytochrome d ubiquinol oxidase subunit II (EC 1.10.3.-)	fig|227866.17.peg.2106, fig|227866.17.peg.3810
Respiration	Electron accepting reactions	Terminal cytochrome d ubiquinol oxidases	Transport ATP-binding protein CydD	fig|227866.17.peg.2108
Respiration	Electron accepting reactions	Terminal cytochrome d ubiquinol oxidases	Transport ATP-binding protein CydC	fig|227866.17.peg.2107
Respiration	Electron accepting reactions	Terminal cytochrome C oxidases	Cytochrome c oxidase, subunit IV (EC 1.9.3.1)	fig|227866.17.peg.1033
Respiration	Electron accepting reactions	Terminal cytochrome C oxidases	Cytochrome c oxidase polypeptide III (EC 1.9.3.1)	fig|227866.17.peg.1034
Respiration	Electron accepting reactions	Terminal cytochrome C oxidases	Cytochrome c oxidase polypeptide I (EC 1.9.3.1)	fig|227866.17.peg.1035
Respiration	Electron accepting reactions	Terminal cytochrome C oxidases	Cytochrome c oxidase polypeptide II (EC 1.9.3.1)	fig|227866.17.peg.1036
Respiration	Electron accepting reactions	Terminal AA3-600 quinol oxidase	AA3-600 quinol oxidase subunit IV	fig|227866.17.peg.2177
Respiration	Electron accepting reactions	Terminal AA3-600 quinol oxidase	AA3-600 quinol oxidase subunit II	fig|227866.17.peg.2174
Respiration	Electron accepting reactions	Terminal AA3-600 quinol oxidase	AA3-600 quinol oxidase subunit IIII	fig|227866.17.peg.2176
Respiration	Electron accepting reactions	Terminal AA3-600 quinol oxidase	AA3-600 quinol oxidase subunit I	fig|227866.17.peg.2175
Respiration	Electron accepting reactions	Anaerobic respiratory reductases	Coenzyme F420-dependent oxidoreductase	fig|227866.17.peg.2182
Respiration	Electron accepting reactions	Anaerobic respiratory reductases	Arsenate reductase (EC 1.20.4.1)	fig|227866.17.peg.2756, fig|227866.17.peg.3058
Respiration	Electron accepting reactions	Anaerobic respiratory reductases	Anaerobic dehydrogenases, typically selenocysteine-containing	fig|227866.17.peg.645, fig|227866.17.peg.1880
Respiration	Electron accepting reactions	Terminal cytochrome oxidases	Cytochrome d ubiquinol oxidase subunit I (EC 1.10.3.-)	fig|227866.17.peg.2105, fig|227866.17.peg.3809
Respiration	Electron accepting reactions	Terminal cytochrome oxidases	Cytochrome d ubiquinol oxidase subunit II (EC 1.10.3.-)	fig|227866.17.peg.2106, fig|227866.17.peg.3810
Respiration	Electron accepting reactions	Terminal cytochrome oxidases	Transport ATP-binding protein CydD	fig|227866.17.peg.2108
Respiration	Electron accepting reactions	Terminal cytochrome oxidases	AA3-600 quinol oxidase subunit IV	fig|227866.17.peg.2177
Respiration	Electron accepting reactions	Terminal cytochrome oxidases	AA3-600 quinol oxidase subunit II	fig|227866.17.peg.2174
Respiration	Electron accepting reactions	Terminal cytochrome oxidases	Transport ATP-binding protein CydC	fig|227866.17.peg.2107
Respiration	Electron accepting reactions	Terminal cytochrome oxidases	AA3-600 quinol oxidase subunit IIII	fig|227866.17.peg.2176
Respiration	Electron accepting reactions	Terminal cytochrome oxidases	AA3-600 quinol oxidase subunit I	fig|227866.17.peg.2175
Respiration	Electron donating reactions	Respiratory dehydrogenases 1	Proline dehydrogenase (EC 1.5.99.8) (Proline oxidase)	fig|227866.17.peg.2751, fig|227866.17.peg.3259
Respiration	Electron donating reactions	Respiratory dehydrogenases 1	D-amino acid dehydrogenase large subunit (EC 1.4.99.1)	fig|227866.17.peg.2326, fig|227866.17.peg.2328
Respiration	Electron donating reactions	Respiratory dehydrogenases 1	NADH dehydrogenase (EC 1.6.99.3)	fig|227866.17.peg.1329, fig|227866.17.peg.2824, fig|227866.17.peg.2834
Respiration	Electron donating reactions	Respiratory dehydrogenases 1	Glycerol-1-phosphate dehydrogenase [NAD(P)] (EC 1.1.1.261)	fig|227866.17.peg.3615
Respiration	Electron donating reactions	Respiratory dehydrogenases 1	Aerobic glycerol-3-phosphate dehydrogenase (EC 1.1.5.3)	fig|227866.17.peg.1763
Respiration	Electron donating reactions	Respiratory dehydrogenases 1	D-amino acid dehydrogenase small subunit (EC 1.4.99.1)	fig|227866.17.peg.2778
Respiration	Electron donating reactions	Succinate dehydrogenase	Succinate dehydrogenase iron-sulfur protein (EC 1.3.99.1)	fig|227866.17.peg.3579
Respiration	Electron donating reactions	Succinate dehydrogenase	Succinate dehydrogenase cytochrome b558 subunit	fig|227866.17.peg.3581
Respiration	Electron donating reactions	Succinate dehydrogenase	Succinate dehydrogenase flavoprotein subunit (EC 1.3.99.1)	fig|227866.17.peg.3580
Respiration	Respiration - no subcategory	Quinone oxidoreductase family	YhdH, a putative quinone oxidoreductase	fig|227866.17.peg.1659
Respiration	Respiration - no subcategory	Quinone oxidoreductase family	Putative oxidoreductase YncB	fig|227866.17.peg.4008
Respiration	Respiration - no subcategory	Biogenesis of cytochrome c oxidases	Heme A synthase, cytochrome oxidase biogenesis protein Cox15-CtaA	fig|227866.17.peg.1040
Respiration	Respiration - no subcategory	Biogenesis of cytochrome c oxidases	Cytochrome oxidase biogenesis protein Sco1/SenC/PrrC, putative copper metallochaperone	fig|227866.17.peg.499
Respiration	Respiration - no subcategory	Biogenesis of cytochrome c oxidases	Heme O synthase, protoheme IX farnesyltransferase (EC 2.5.1.-) COX10-CtaB	fig|227866.17.peg.1038, fig|227866.17.peg.1355
Respiration	Respiration - no subcategory	Formate hydrogenase	Formate dehydrogenase chain D (EC 1.2.1.2)	fig|227866.17.peg.2330
Respiration	Respiration - no subcategory	Formate hydrogenase	Formate dehydrogenase related protein	fig|227866.17.peg.1345, fig|227866.17.peg.4225
Respiration	Respiration - no subcategory	Formate hydrogenase	Hypothetical protein YrhD	fig|227866.17.peg.1344, fig|227866.17.peg.4226
Respiration	Respiration - no subcategory	Biogenesis of c-type cytochromes	Cytochrome c-type biogenesis protein ResA	fig|227866.17.peg.353
Respiration	Respiration - no subcategory	Biogenesis of c-type cytochromes	Cytochrome c-type biogenesis protein Ccs1/ResB	fig|227866.17.peg.354
Respiration	Respiration - no subcategory	Biogenesis of c-type cytochromes	Cytochrome c-type biogenesis protein CcsA/ResC	fig|227866.17.peg.355
Respiration	Respiration - no subcategory	Biogenesis of c-type cytochromes	Thiol:disulfide oxidoreductase related to ResA	fig|227866.17.peg.709, fig|227866.17.peg.1154
Respiration	Respiration - no subcategory	Biogenesis of c-type cytochromes	Periplasmic thiol:disulfide interchange protein DsbA	fig|227866.17.peg.2676
Respiration	Respiration - no subcategory	Biogenesis of c-type cytochromes	Cytochrome c-type biogenesis protein DsbD, protein-disulfide reductase (EC 1.8.1.8)	fig|227866.17.peg.3328
Respiration	Respiration - no subcategory	Biogenesis of c-type cytochromes	Cytochrome c-type biogenesis protein CcdA (DsbD analog)	fig|227866.17.peg.717
Respiration	Respiration - no subcategory	Soluble cytochromes and functionally related electron carriers	Membrane-attached cytochrome c550	fig|227866.17.peg.137, fig|227866.17.peg.2488
Respiration	Respiration - no subcategory	Soluble cytochromes and functionally related electron carriers	Ferredoxin	fig|227866.17.peg.51, fig|227866.17.peg.364, fig|227866.17.peg.1628
Stress Response	Osmotic stress	Osmoregulation	Glycerol uptake facilitator protein	fig|227866.17.peg.1765
Stress Response	Osmotic stress	Choline and Betaine Uptake and Betaine Biosynthesis	Glycine betaine ABC transport system, glycine betaine-binding protein OpuAC	fig|227866.17.peg.3280
Stress Response	Osmotic stress	Choline and Betaine Uptake and Betaine Biosynthesis	Osmotically activated L-carnitine/choline ABC transporter, permease protein OpuCB	fig|227866.17.peg.2635, fig|227866.17.peg.2640
Stress Response	Osmotic stress	Choline and Betaine Uptake and Betaine Biosynthesis	Osmotically activated L-carnitine/choline ABC transporter, ATP-binding protein OpuCA	fig|227866.17.peg.2634
Stress Response	Osmotic stress	Choline and Betaine Uptake and Betaine Biosynthesis	Glycine betaine ABC transport system, ATP-binding protein OpuAA (EC 3.6.3.32)	fig|227866.17.peg.3282
Stress Response	Osmotic stress	Choline and Betaine Uptake and Betaine Biosynthesis	Betaine aldehyde dehydrogenase (EC 1.2.1.8)	fig|227866.17.peg.2947
Stress Response	Osmotic stress	Choline and Betaine Uptake and Betaine Biosynthesis	Glycine betaine transporter OpuD	fig|227866.17.peg.3743
Stress Response	Osmotic stress	Choline and Betaine Uptake and Betaine Biosynthesis	Osmotically activated L-carnitine/choline ABC transporter, permease protein OpuCD	fig|227866.17.peg.2637, fig|227866.17.peg.2642
Stress Response	Osmotic stress	Choline and Betaine Uptake and Betaine Biosynthesis	Glycine betaine ABC transport system, permease protein OpuAB	fig|227866.17.peg.3281
Stress Response	Osmotic stress	Choline and Betaine Uptake and Betaine Biosynthesis	Osmotically activated L-carnitine/choline ABC transporter, substrate-binding protein OpuCC	fig|227866.17.peg.2636, fig|227866.17.peg.2641
Stress Response	Osmotic stress	Choline and Betaine Uptake and Betaine Biosynthesis	Choline ABC transport system, ATP-binding protein OpuBA	fig|227866.17.peg.2639
Stress Response	Oxidative stress	Protection from Reactive Oxygen Species	Manganese superoxide dismutase (EC 1.15.1.1)	fig|227866.17.peg.153
Stress Response	Oxidative stress	Protection from Reactive Oxygen Species	Superoxide dismutase [Cu-Zn] precursor (EC 1.15.1.1)	fig|227866.17.peg.557
Stress Response	Oxidative stress	Protection from Reactive Oxygen Species	Superoxide dismutase [Fe] (EC 1.15.1.1)	fig|227866.17.peg.564
Stress Response	Oxidative stress	Protection from Reactive Oxygen Species	Catalase (EC 1.11.1.6)	fig|227866.17.peg.1307, fig|227866.17.peg.1817, fig|227866.17.peg.2069, fig|227866.17.peg.2119, fig|227866.17.peg.3125
Stress Response	Oxidative stress	Oxidative stress	Iron-binding ferritin-like antioxidant protein	fig|227866.17.peg.2738, fig|227866.17.peg.3802
Stress Response	Oxidative stress	Oxidative stress	Organic hydroperoxide resistance transcriptional regulator	fig|227866.17.peg.1233
Stress Response	Oxidative stress	Oxidative stress	Alkyl hydroperoxide reductase subunit C-like protein	fig|227866.17.peg.1111
Stress Response	Oxidative stress	Oxidative stress	Manganese superoxide dismutase (EC 1.15.1.1)	fig|227866.17.peg.153
Stress Response	Oxidative stress	Oxidative stress	Zinc uptake regulation protein ZUR	fig|227866.17.peg.146
Stress Response	Oxidative stress	Oxidative stress	Superoxide dismutase [Cu-Zn] precursor (EC 1.15.1.1)	fig|227866.17.peg.557
Stress Response	Oxidative stress	Oxidative stress	Non-specific DNA-binding protein Dps	fig|227866.17.peg.2738, fig|227866.17.peg.3802
Stress Response	Oxidative stress	Oxidative stress	Superoxide dismutase [Fe] (EC 1.15.1.1)	fig|227866.17.peg.564
Stress Response	Oxidative stress	Oxidative stress	Ferroxidase (EC 1.16.3.1)	fig|227866.17.peg.2738, fig|227866.17.peg.3802
Stress Response	Oxidative stress	Oxidative stress	Redox-sensitive transcriptional regulator (AT-rich DNA-binding protein)	fig|227866.17.peg.3858
Stress Response	Oxidative stress	Oxidative stress	Peroxide stress regulator PerR, FUR family	fig|227866.17.peg.4132
Stress Response	Oxidative stress	Oxidative stress	Ferric uptake regulation protein FUR	fig|227866.17.peg.315
Stress Response	Oxidative stress	Oxidative stress	Nitrite-sensitive transcriptional repressor NsrR	fig|227866.17.peg.1755
Stress Response	Oxidative stress	Oxidative stress	transcriptional regulator, Crp/Fnr family	fig|227866.17.peg.2265
Stress Response	Oxidative stress	Oxidative stress	Catalase (EC 1.11.1.6)	fig|227866.17.peg.1307, fig|227866.17.peg.1817, fig|227866.17.peg.2069, fig|227866.17.peg.2119, fig|227866.17.peg.3125
Stress Response	Oxidative stress	Oxidative stress	Organic hydroperoxide resistance protein	fig|227866.17.peg.1232, fig|227866.17.peg.1234
Stress Response	Oxidative stress	Glutathione: Non-redox reactions	Lactoylglutathione lyase (EC 4.4.1.5)	fig|227866.17.peg.3609
Stress Response	Oxidative stress	Glutathione: Non-redox reactions	Similar to Hydroxyacylglutathione hydrolase, but in an organism lacking glutathione biosynthesis	fig|227866.17.peg.178
Stress Response	Oxidative stress	Glutathione: Non-redox reactions	Hydroxyacylglutathione hydrolase (EC 3.1.2.6)	fig|227866.17.peg.286
Stress Response	Oxidative stress	Redox-dependent regulation of nucleus processes	Nicotinate phosphoribosyltransferase (EC 2.4.2.11)	fig|227866.17.peg.2870
Stress Response	Oxidative stress	Redox-dependent regulation of nucleus processes	NADPH-dependent glyceraldehyde-3-phosphate dehydrogenase (EC 1.2.1.13)	fig|227866.17.peg.3642
Stress Response	Oxidative stress	Redox-dependent regulation of nucleus processes	Nicotinamidase (EC 3.5.1.19)	fig|227866.17.peg.2869, fig|227866.17.peg.4392
Stress Response	Oxidative stress	Redox-dependent regulation of nucleus processes	NAD-dependent protein deacetylase of SIR2 family	fig|227866.17.peg.1729
Stress Response	Oxidative stress	Redox-dependent regulation of nucleus processes	NAD-dependent glyceraldehyde-3-phosphate dehydrogenase (EC 1.2.1.12)	fig|227866.17.peg.2623
Stress Response	Oxidative stress	Glutaredoxins	Flavohemoprotein (Hemoglobin-like protein) (Flavohemoglobin) (Nitric oxide dioxygenase) (EC 1.14.12.17)	fig|227866.17.peg.1244, fig|227866.17.peg.1721
Stress Response	Oxidative stress	Glutaredoxins	Cell wall endopeptidase, family M23/M37	fig|227866.17.peg.2809
Stress Response	Oxidative stress	Cluster containing Glutathione synthetase	Ribosomal RNA small subunit methyltransferase E (EC 2.1.1.-)	fig|227866.17.peg.110
Stress Response	Oxidative stress	Cluster containing Glutathione synthetase	Putative Holliday junction resolvase YggF	fig|227866.17.peg.3462
Stress Response	Cold shock	Cold shock, CspA family of proteins	Cold shock protein CspD	fig|227866.17.peg.481, fig|227866.17.peg.1786
Stress Response	Cold shock	Cold shock, CspA family of proteins	Cold shock protein CspA	fig|227866.17.peg.3079
Stress Response	Heat shock	Heat shock dnaK gene cluster extended	Hypothetical radical SAM family enzyme in heat shock gene cluster, similarity with CPO of BS HemN-type	fig|227866.17.peg.104
Stress Response	Heat shock	Heat shock dnaK gene cluster extended	Heat-inducible transcription repressor HrcA	fig|227866.17.peg.105
Stress Response	Heat shock	Heat shock dnaK gene cluster extended	Chaperone protein DnaK	fig|227866.17.peg.107
Stress Response	Heat shock	Heat shock dnaK gene cluster extended	tRNA-t(6)A37 methylthiotransferase	fig|227866.17.peg.111
Stress Response	Heat shock	Heat shock dnaK gene cluster extended	Chaperone protein DnaJ	fig|227866.17.peg.108
Stress Response	Heat shock	Heat shock dnaK gene cluster extended	Ribosomal RNA small subunit methyltransferase E (EC 2.1.1.-)	fig|227866.17.peg.110
Stress Response	Heat shock	Heat shock dnaK gene cluster extended	tmRNA-binding protein SmpB	fig|227866.17.peg.2661
Stress Response	Heat shock	Heat shock dnaK gene cluster extended	Heat shock protein GrpE	fig|227866.17.peg.106
Stress Response	Heat shock	Heat shock dnaK gene cluster extended	DNA replication intiation control protein YabA	fig|227866.17.peg.4371
Stress Response	Heat shock	Heat shock dnaK gene cluster extended	Translation elongation factor LepA	fig|227866.17.peg.103
Stress Response	Heat shock	Heat shock dnaK gene cluster extended	Ribosome-associated heat shock protein implicated in the recycling of the 50S subunit (S4 paralog)	fig|227866.17.peg.4344
Stress Response	Heat shock	Heat shock dnaK gene cluster extended	Nucleoside 5-triphosphatase RdgB (dHAPTP, dITP, XTP-specific) (EC 3.6.1.15)	fig|227866.17.peg.3571
Stress Response	Heat shock	Heat shock dnaK gene cluster extended	Ribosomal protein L11 methyltransferase (EC 2.1.1.-)	fig|227866.17.peg.109
Stress Response	Heat shock	Heat shock dnaK gene cluster extended	Signal peptidase-like protein	fig|227866.17.peg.4372
Stress Response	Heat shock	Heat shock dnaK gene cluster extended	FIG009886: phosphoesterase	fig|227866.17.peg.3570
Stress Response	Heat shock	Heat shock dnaK gene cluster extended	Ribonuclease PH (EC 2.7.7.56)	fig|227866.17.peg.3572
Stress Response	Heat shock	Heat shock dnaK gene cluster extended	rRNA small subunit methyltransferase I	fig|227866.17.peg.4368
Stress Response	Stress Response - no subcategory	Flavohaemoglobin	ABC-type Fe3+-siderophore transport system, permease 2 component	fig|227866.17.peg.2697, fig|227866.17.peg.4105
Stress Response	Stress Response - no subcategory	Flavohaemoglobin	Flavohemoprotein (Hemoglobin-like protein) (Flavohemoglobin) (Nitric oxide dioxygenase) (EC 1.14.12.17)	fig|227866.17.peg.1244, fig|227866.17.peg.1721
Stress Response	Stress Response - no subcategory	SigmaB stress responce regulation	RsbS, negative regulator of sigma-B	fig|227866.17.peg.3098
Stress Response	Stress Response - no subcategory	SigmaB stress responce regulation	Serine-protein kinase RsbW (EC 2.7.11.1)	fig|227866.17.peg.3094
Stress Response	Stress Response - no subcategory	SigmaB stress responce regulation	Serine phosphatase RsbU, regulator of sigma subunit	fig|227866.17.peg.2606, fig|227866.17.peg.3096
Stress Response	Stress Response - no subcategory	SigmaB stress responce regulation	RsbR, positive regulator of sigma-B	fig|227866.17.peg.181, fig|227866.17.peg.552, fig|227866.17.peg.1225, fig|227866.17.peg.3099, fig|227866.17.peg.3771, fig|227866.17.peg.3975
Stress Response	Stress Response - no subcategory	SigmaB stress responce regulation	RNA polymerase sigma factor SigB	fig|227866.17.peg.3093
Stress Response	Stress Response - no subcategory	SigmaB stress responce regulation	Anti-sigma B factor antagonist RsbV	fig|227866.17.peg.322, fig|227866.17.peg.3095
Stress Response	Stress Response - no subcategory	Dimethylarginine metabolism	Ornithine aminotransferase (EC 2.6.1.13)	fig|227866.17.peg.1933
Stress Response	Stress Response - no subcategory	Dimethylarginine metabolism	NG,NG-dimethylarginine dimethylaminohydrolase 1 (EC 3.5.3.18)	fig|227866.17.peg.1246
Stress Response	Stress Response - no subcategory	Bacterial hemoglobins	Flavohemoprotein (Hemoglobin-like protein) (Flavohemoglobin) (Nitric oxide dioxygenase) (EC 1.14.12.17)	fig|227866.17.peg.1244, fig|227866.17.peg.1721
Stress Response	Stress Response - no subcategory	Bacterial hemoglobins	Copper binding protein, plastocyanin/azurin family	fig|227866.17.peg.993
Stress Response	Stress Response - no subcategory	Bacterial hemoglobins	Hemoglobin-like protein HbO	fig|227866.17.peg.1524
Stress Response	Stress Response - no subcategory	Hfl operon	GTP-binding protein HflX	fig|227866.17.peg.775
Stress Response	Stress Response - no subcategory	Hfl operon	RNA-binding protein Hfq	fig|227866.17.peg.786
Stress Response	Stress Response - no subcategory	Carbon Starvation	Carbon storage regulator	fig|227866.17.peg.2477
Stress Response	Stress Response - no subcategory	Carbon Starvation	Carbon starvation protein A	fig|227866.17.peg.3610
Stress Response	Stress Response - no subcategory	Carbon Starvation	Starvation sensing protein RspB	fig|227866.17.peg.1323
Metabolism of Aromatic Compounds	Peripheral pathways for catabolism of aromatic compounds	Salicylate ester degradation	Salicylate hydroxylase (EC 1.14.13.1)	fig|227866.17.peg.3980
Metabolism of Aromatic Compounds	Peripheral pathways for catabolism of aromatic compounds	Quinate degradation	3-dehydroquinate dehydratase II (EC 4.2.1.10)	fig|227866.17.peg.212
Metabolism of Aromatic Compounds	Peripheral pathways for catabolism of aromatic compounds	Quinate degradation	3-dehydroquinate dehydratase I (EC 4.2.1.10)	fig|227866.17.peg.360
Metabolism of Aromatic Compounds	Peripheral pathways for catabolism of aromatic compounds	Biphenyl Degradation	Biphenyl-2,3-diol 1,2-dioxygenase (EC 1.13.11.39)	fig|227866.17.peg.4087
Metabolism of Aromatic Compounds	Anaerobic degradation of aromatic compounds	Hydroxyaromatic decarboxylase family	Hydroxyaromatic non-oxidative decarboxylase protein D (EC 4.1.1.-)	fig|227866.17.peg.3210, fig|227866.17.peg.3211
Metabolism of Aromatic Compounds	Anaerobic degradation of aromatic compounds	Hydroxyaromatic decarboxylase family	Hydroxyaromatic non-oxidative decarboxylase protein B (EC 4.1.1.-)	fig|227866.17.peg.3213
Metabolism of Aromatic Compounds	Anaerobic degradation of aromatic compounds	Hydroxyaromatic decarboxylase family	Hydroxyaromatic non-oxidative decarboxylase protein C (EC 4.1.1.-)	fig|227866.17.peg.3212
Metabolism of Aromatic Compounds	Metabolism of central aromatic intermediates	Salicylate and gentisate catabolism	Salicylate hydroxylase (EC 1.14.13.1)	fig|227866.17.peg.3980
Metabolism of Aromatic Compounds	Metabolism of central aromatic intermediates	Salicylate and gentisate catabolism	Fumarylacetoacetate hydrolase family protein	fig|227866.17.peg.54, fig|227866.17.peg.1612
Metabolism of Aromatic Compounds	Metabolism of Aromatic Compounds - no subcategory	Aromatic Amin Catabolism	4-hydroxyphenylacetate 3-monooxygenase (EC 1.14.13.3)	fig|227866.17.peg.635
Metabolism of Aromatic Compounds	Metabolism of Aromatic Compounds - no subcategory	Aromatic Amin Catabolism	Nitrilotriacetate monooxygenase component B (EC 1.14.13.-)	fig|227866.17.peg.2399
Metabolism of Aromatic Compounds	Metabolism of Aromatic Compounds - no subcategory	Gentisate degradation	Fumarylacetoacetate hydrolase family protein	fig|227866.17.peg.54, fig|227866.17.peg.1612
Amino Acids and Derivatives	Glutamine, glutamate, aspartate, asparagine; ammonia assimilation	Glutamine, Glutamate, Aspartate and Asparagine Biosynthesis	L-asparaginase I, cytoplasmic (EC 3.5.1.1)	fig|227866.17.peg.309
Amino Acids and Derivatives	Glutamine, glutamate, aspartate, asparagine; ammonia assimilation	Glutamine, Glutamate, Aspartate and Asparagine Biosynthesis	Asparagine synthetase [glutamine-hydrolyzing] (EC 6.3.5.4) AsnB	fig|227866.17.peg.3792
Amino Acids and Derivatives	Glutamine, glutamate, aspartate, asparagine; ammonia assimilation	Glutamine, Glutamate, Aspartate and Asparagine Biosynthesis	Ferredoxin-dependent glutamate synthase (EC 1.4.7.1)	fig|227866.17.peg.3918
Amino Acids and Derivatives	Glutamine, glutamate, aspartate, asparagine; ammonia assimilation	Glutamine, Glutamate, Aspartate and Asparagine Biosynthesis	L-asparaginase (EC 3.5.1.1)	fig|227866.17.peg.3311
Amino Acids and Derivatives	Glutamine, glutamate, aspartate, asparagine; ammonia assimilation	Glutamine, Glutamate, Aspartate and Asparagine Biosynthesis	Aspartate aminotransferase (EC 2.6.1.1)	fig|227866.17.peg.436, fig|227866.17.peg.1598, fig|227866.17.peg.1736, fig|227866.17.peg.2226, fig|227866.17.peg.2906, fig|227866.17.peg.3049, fig|227866.17.peg.3072, fig|227866.17.peg.3221
Amino Acids and Derivatives	Glutamine, glutamate, aspartate, asparagine; ammonia assimilation	Glutamine, Glutamate, Aspartate and Asparagine Biosynthesis	NAD-specific glutamate dehydrogenase (EC 1.4.1.2)	fig|227866.17.peg.372, fig|227866.17.peg.2215
Amino Acids and Derivatives	Glutamine, glutamate, aspartate, asparagine; ammonia assimilation	Glutamine, Glutamate, Aspartate and Asparagine Biosynthesis	Glutamate racemase (EC 5.1.1.3)	fig|227866.17.peg.3574, fig|227866.17.peg.4182
Amino Acids and Derivatives	Glutamine, glutamate, aspartate, asparagine; ammonia assimilation	Glutamine, Glutamate, Aspartate and Asparagine Biosynthesis	Glutaminase (EC 3.5.1.2)	fig|227866.17.peg.1045, fig|227866.17.peg.3340
Amino Acids and Derivatives	Glutamine, glutamate, aspartate, asparagine; ammonia assimilation	Glutamine, Glutamate, Aspartate and Asparagine Biosynthesis	Glutamate synthase [NADPH] large chain (EC 1.4.1.13)	fig|227866.17.peg.663
Amino Acids and Derivatives	Glutamine, glutamate, aspartate, asparagine; ammonia assimilation	Glutamine, Glutamate, Aspartate and Asparagine Biosynthesis	Glutamine synthetase type I (EC 6.3.1.2)	fig|227866.17.peg.772
Amino Acids and Derivatives	Glutamine, glutamate, aspartate, asparagine; ammonia assimilation	Glutamine, Glutamate, Aspartate and Asparagine Biosynthesis	Glutamate synthase [NADPH] small chain (EC 1.4.1.13)	fig|227866.17.peg.664
Amino Acids and Derivatives	Glutamine, glutamate, aspartate, asparagine; ammonia assimilation	Glutamine, Glutamate, Aspartate and Asparagine Biosynthesis	Leucine-responsive regulatory protein, regulator for leucine (or lrp) regulon and high-affinity branched-chain amino acid transport system	fig|227866.17.peg.3143, fig|227866.17.peg.3912
Amino Acids and Derivatives	Glutamine, glutamate, aspartate, asparagine; ammonia assimilation	Glutamine, Glutamate, Aspartate and Asparagine Biosynthesis	Asparagine synthetase [glutamine-hydrolyzing] (EC 6.3.5.4) YisO	fig|227866.17.peg.1608
Amino Acids and Derivatives	Glutamine, glutamate, aspartate, asparagine; ammonia assimilation	Glutamine, Glutamate, Aspartate and Asparagine Biosynthesis	Aspartate ammonia-lyase (EC 4.3.1.1)	fig|227866.17.peg.310
Amino Acids and Derivatives	Glutamine, glutamate, aspartate, asparagine; ammonia assimilation	Glutamine, Glutamate, Aspartate and Asparagine Biosynthesis	Aspartate racemase (EC 5.1.1.13)	fig|227866.17.peg.3, fig|227866.17.peg.4
Amino Acids and Derivatives	Glutamine, glutamate, aspartate, asparagine; ammonia assimilation	Glutamate dehydrogenases	NAD-specific glutamate dehydrogenase (EC 1.4.1.2)	fig|227866.17.peg.372, fig|227866.17.peg.2215
Amino Acids and Derivatives	Glutamine, glutamate, aspartate, asparagine; ammonia assimilation	Glutamine synthetases	Glutamine synthetase type I (EC 6.3.1.2)	fig|227866.17.peg.772
Amino Acids and Derivatives	Glutamine, glutamate, aspartate, asparagine; ammonia assimilation	Poly-gamma-glutamate biosynthesis	Gamma-glutamyltranspeptidase (EC 2.3.2.2)	fig|227866.17.peg.667, fig|227866.17.peg.2397
Amino Acids and Derivatives	Glutamine, glutamate, aspartate, asparagine; ammonia assimilation	Poly-gamma-glutamate biosynthesis	Glutamate racemase (EC 5.1.1.3)	fig|227866.17.peg.3574, fig|227866.17.peg.4182
Amino Acids and Derivatives	Glutamine, glutamate, aspartate, asparagine; ammonia assimilation	Poly-gamma-glutamate biosynthesis	Poly-gamma-glutamate synthase subunit PgsC/CapC (EC 6.3.2.-)	fig|227866.17.peg.2418
Amino Acids and Derivatives	Glutamine, glutamate, aspartate, asparagine; ammonia assimilation	Poly-gamma-glutamate biosynthesis	Transition state regulatory protein AbrB	fig|227866.17.peg.4367
Amino Acids and Derivatives	Glutamine, glutamate, aspartate, asparagine; ammonia assimilation	Poly-gamma-glutamate biosynthesis	Poly-gamma-glutamate synthase subunit PgsA/CapA (EC 6.3.2.-)	fig|227866.17.peg.2419
Amino Acids and Derivatives	Glutamine, glutamate, aspartate, asparagine; ammonia assimilation	Poly-gamma-glutamate biosynthesis	Poly-gamma-glutamate synthase subunit PgsB/CapB (EC 6.3.2.-)	fig|227866.17.peg.2417
Amino Acids and Derivatives	Glutamine, glutamate, aspartate, asparagine; ammonia assimilation	Poly-gamma-glutamate biosynthesis	Gamma-DL-glutamyl hydrolase PgsS (EC 3.4.19.-), catalyzes PGA release	fig|227866.17.peg.2421
Amino Acids and Derivatives	Glutamine, glutamate, aspartate, asparagine; ammonia assimilation	Poly-gamma-glutamate biosynthesis	Putative transition state regulator Abh	fig|227866.17.peg.1085
Amino Acids and Derivatives	Glutamine, glutamate, aspartate, asparagine; ammonia assimilation	Poly-gamma-glutamate biosynthesis	Poly-gamma-glutamate synthase subunit PgsE/CapE (EC 6.3.2.-)	fig|227866.17.peg.2420
Amino Acids and Derivatives	Histidine Metabolism	Histidine Degradation	Hut operon positive regulatory protein	fig|227866.17.peg.2035
Amino Acids and Derivatives	Histidine Metabolism	Histidine Degradation	Formiminoglutamase (EC 3.5.3.8)	fig|227866.17.peg.2031
Amino Acids and Derivatives	Histidine Metabolism	Histidine Degradation	Imidazolonepropionase (EC 3.5.2.7)	fig|227866.17.peg.2032
Amino Acids and Derivatives	Histidine Metabolism	Histidine Degradation	Urocanate hydratase (EC 4.2.1.49)	fig|227866.17.peg.2033
Amino Acids and Derivatives	Histidine Metabolism	Histidine Degradation	Histidine ammonia-lyase (EC 4.3.1.3)	fig|227866.17.peg.2034
Amino Acids and Derivatives	Histidine Metabolism	Histidine Degradation	Histidine transport protein (permease)	fig|227866.17.peg.2030
Amino Acids and Derivatives	Histidine Metabolism	Histidine Biosynthesis	Phosphoribosylformimino-5-aminoimidazole carboxamide ribotide isomerase (EC 5.3.1.16)	fig|227866.17.peg.2528
Amino Acids and Derivatives	Histidine Metabolism	Histidine Biosynthesis	Phosphoribosyl-ATP pyrophosphatase (EC 3.6.1.31)	fig|227866.17.peg.2530
Amino Acids and Derivatives	Histidine Metabolism	Histidine Biosynthesis	Imidazole glycerol phosphate synthase amidotransferase subunit (EC 2.4.2.-)	fig|227866.17.peg.2527
Amino Acids and Derivatives	Histidine Metabolism	Histidine Biosynthesis	Histidinol-phosphate aminotransferase (EC 2.6.1.9)	fig|227866.17.peg.410
Amino Acids and Derivatives	Histidine Metabolism	Histidine Biosynthesis	Imidazoleglycerol-phosphate dehydratase (EC 4.2.1.19)	fig|227866.17.peg.2526
Amino Acids and Derivatives	Histidine Metabolism	Histidine Biosynthesis	ATP phosphoribosyltransferase regulatory subunit (EC 2.4.2.17)	fig|227866.17.peg.2523
Amino Acids and Derivatives	Histidine Metabolism	Histidine Biosynthesis	Imidazole glycerol phosphate synthase cyclase subunit (EC 4.1.3.-)	fig|227866.17.peg.2529
Amino Acids and Derivatives	Histidine Metabolism	Histidine Biosynthesis	Phosphoribosyl-AMP cyclohydrolase (EC 3.5.4.19)	fig|227866.17.peg.2530
Amino Acids and Derivatives	Histidine Metabolism	Histidine Biosynthesis	ATP phosphoribosyltransferase (EC 2.4.2.17)	fig|227866.17.peg.2524
Amino Acids and Derivatives	Histidine Metabolism	Histidine Biosynthesis	Histidinol dehydrogenase (EC 1.1.1.23)	fig|227866.17.peg.2525
Amino Acids and Derivatives	Histidine Metabolism	Histidine Biosynthesis	Histidinol-phosphatase (EC 3.1.3.15)	fig|227866.17.peg.3696
Amino Acids and Derivatives	Arginine; urea cycle, polyamines	Putrescine utilization pathways	Gamma-aminobutyrate:alpha-ketoglutarate aminotransferase (EC 2.6.1.19)	fig|227866.17.peg.3182, fig|227866.17.peg.3513
Amino Acids and Derivatives	Arginine; urea cycle, polyamines	Polyamine Metabolism	Putrescine transport ATP-binding protein PotA (TC 3.A.1.11.1)	fig|227866.17.peg.55
Amino Acids and Derivatives	Arginine; urea cycle, polyamines	Polyamine Metabolism	Arginine/ornithine antiporter ArcD	fig|227866.17.peg.151, fig|227866.17.peg.731, fig|227866.17.peg.1573, fig|227866.17.peg.2505, fig|227866.17.peg.2694
Amino Acids and Derivatives	Arginine; urea cycle, polyamines	Polyamine Metabolism	Spermidine synthase (EC 2.5.1.16)	fig|227866.17.peg.2247
Amino Acids and Derivatives	Arginine; urea cycle, polyamines	Polyamine Metabolism	Arginine decarboxylase (EC 4.1.1.19)	fig|227866.17.peg.1067, fig|227866.17.peg.4377
Amino Acids and Derivatives	Arginine; urea cycle, polyamines	Polyamine Metabolism	Agmatinase (EC 3.5.3.11)	fig|227866.17.peg.2248
Amino Acids and Derivatives	Arginine; urea cycle, polyamines	Polyamine Metabolism	S-adenosylmethionine decarboxylase proenzyme (EC 4.1.1.50), prokaryotic class 1B	fig|227866.17.peg.3641
Amino Acids and Derivatives	Arginine; urea cycle, polyamines	Polyamine Metabolism	5'-methylthioadenosine nucleosidase (EC 3.2.2.16)	fig|227866.17.peg.3450
Amino Acids and Derivatives	Arginine; urea cycle, polyamines	Arginine and Ornithine Degradation	Arginine/ornithine antiporter ArcD	fig|227866.17.peg.151, fig|227866.17.peg.731, fig|227866.17.peg.1573, fig|227866.17.peg.2505, fig|227866.17.peg.2694
Amino Acids and Derivatives	Arginine; urea cycle, polyamines	Arginine and Ornithine Degradation	Arginine utilization protein RocB	fig|227866.17.peg.284, fig|227866.17.peg.2217
Amino Acids and Derivatives	Arginine; urea cycle, polyamines	Arginine and Ornithine Degradation	Arginase (EC 3.5.3.1)	fig|227866.17.peg.1935
Amino Acids and Derivatives	Arginine; urea cycle, polyamines	Arginine and Ornithine Degradation	Ornithine aminotransferase (EC 2.6.1.13)	fig|227866.17.peg.1933
Amino Acids and Derivatives	Arginine; urea cycle, polyamines	Arginine and Ornithine Degradation	Agmatinase (EC 3.5.3.11)	fig|227866.17.peg.2248
Amino Acids and Derivatives	Arginine; urea cycle, polyamines	Arginine and Ornithine Degradation	Arginine utilization regulatory protein RocR	fig|227866.17.peg.1931
Amino Acids and Derivatives	Arginine; urea cycle, polyamines	Arginine and Ornithine Degradation	Arginine permease RocE	fig|227866.17.peg.1934, fig|227866.17.peg.2218, fig|227866.17.peg.3344
Amino Acids and Derivatives	Arginine; urea cycle, polyamines	Arginine and Ornithine Degradation	Arginine pathway regulatory protein ArgR, repressor of arg regulon	fig|227866.17.peg.235
Amino Acids and Derivatives	Arginine; urea cycle, polyamines	Arginine and Ornithine Degradation	Arginine decarboxylase (EC 4.1.1.19)	fig|227866.17.peg.1067, fig|227866.17.peg.4377
Amino Acids and Derivatives	Arginine; urea cycle, polyamines	Arginine and Ornithine Degradation	Delta-1-pyrroline-5-carboxylate dehydrogenase (EC 1.2.1.88)	fig|227866.17.peg.3258
Amino Acids and Derivatives	Arginine; urea cycle, polyamines	Arginine and Ornithine Degradation	Ornithine carbamoyltransferase (EC 2.1.3.3)	fig|227866.17.peg.1558
Amino Acids and Derivatives	Arginine; urea cycle, polyamines	Arginine and Ornithine Degradation	Lysine-arginine-ornithine-binding periplasmic protein precursor (TC 3.A.1.3.1)	fig|227866.17.peg.3241
Amino Acids and Derivatives	Arginine; urea cycle, polyamines	Arginine Biosynthesis -- gjo	Acetylornithine deacetylase (EC 3.5.1.16)	fig|227866.17.peg.519
Amino Acids and Derivatives	Arginine; urea cycle, polyamines	Arginine Biosynthesis -- gjo	Glutamate N-acetyltransferase (EC 2.3.1.35)	fig|227866.17.peg.1563
Amino Acids and Derivatives	Arginine; urea cycle, polyamines	Arginine Biosynthesis -- gjo	Acetylglutamate kinase (EC 2.7.2.8)	fig|227866.17.peg.1562
Amino Acids and Derivatives	Arginine; urea cycle, polyamines	Arginine Biosynthesis -- gjo	N-acetylglutamate synthase (EC 2.3.1.1)	fig|227866.17.peg.594, fig|227866.17.peg.1563
Amino Acids and Derivatives	Arginine; urea cycle, polyamines	Arginine Biosynthesis -- gjo	Arginine pathway regulatory protein ArgR, repressor of arg regulon	fig|227866.17.peg.235
Amino Acids and Derivatives	Arginine; urea cycle, polyamines	Arginine Biosynthesis -- gjo	Argininosuccinate lyase (EC 4.3.2.1)	fig|227866.17.peg.3676
Amino Acids and Derivatives	Arginine; urea cycle, polyamines	Arginine Biosynthesis -- gjo	Argininosuccinate synthase (EC 6.3.4.5)	fig|227866.17.peg.3677
Amino Acids and Derivatives	Arginine; urea cycle, polyamines	Arginine Biosynthesis -- gjo	N-acetyl-gamma-glutamyl-phosphate reductase (EC 1.2.1.38)	fig|227866.17.peg.1564
Amino Acids and Derivatives	Arginine; urea cycle, polyamines	Arginine Biosynthesis -- gjo	Ornithine carbamoyltransferase (EC 2.1.3.3)	fig|227866.17.peg.1558
Amino Acids and Derivatives	Arginine; urea cycle, polyamines	Arginine Biosynthesis -- gjo	Acetylornithine aminotransferase (EC 2.6.1.11)	fig|227866.17.peg.1561
Amino Acids and Derivatives	Arginine; urea cycle, polyamines	Arginine Deiminase Pathway	Arginine/ornithine antiporter ArcD	fig|227866.17.peg.151, fig|227866.17.peg.731, fig|227866.17.peg.1573, fig|227866.17.peg.2505, fig|227866.17.peg.2694
Amino Acids and Derivatives	Arginine; urea cycle, polyamines	Arginine Deiminase Pathway	Arginine pathway regulatory protein ArgR, repressor of arg regulon	fig|227866.17.peg.235
Amino Acids and Derivatives	Arginine; urea cycle, polyamines	Arginine Deiminase Pathway	Ornithine carbamoyltransferase (EC 2.1.3.3)	fig|227866.17.peg.1558
Amino Acids and Derivatives	Arginine; urea cycle, polyamines	Urease subunits	Urease beta subunit (EC 3.5.1.5)	fig|227866.17.peg.2339
Amino Acids and Derivatives	Arginine; urea cycle, polyamines	Urease subunits	Urease gamma subunit (EC 3.5.1.5)	fig|227866.17.peg.2338
Amino Acids and Derivatives	Arginine; urea cycle, polyamines	Urease subunits	Urease alpha subunit (EC 3.5.1.5)	fig|227866.17.peg.2340
Amino Acids and Derivatives	Arginine; urea cycle, polyamines	Arginine Biosynthesis extended	Acetylornithine deacetylase (EC 3.5.1.16)	fig|227866.17.peg.519
Amino Acids and Derivatives	Arginine; urea cycle, polyamines	Arginine Biosynthesis extended	Glutamate N-acetyltransferase (EC 2.3.1.35)	fig|227866.17.peg.1563
Amino Acids and Derivatives	Arginine; urea cycle, polyamines	Arginine Biosynthesis extended	Acetylglutamate kinase (EC 2.7.2.8)	fig|227866.17.peg.1562
Amino Acids and Derivatives	Arginine; urea cycle, polyamines	Arginine Biosynthesis extended	N-acetylglutamate synthase (EC 2.3.1.1)	fig|227866.17.peg.594, fig|227866.17.peg.1563
Amino Acids and Derivatives	Arginine; urea cycle, polyamines	Arginine Biosynthesis extended	Arginine pathway regulatory protein ArgR, repressor of arg regulon	fig|227866.17.peg.235
Amino Acids and Derivatives	Arginine; urea cycle, polyamines	Arginine Biosynthesis extended	Argininosuccinate lyase (EC 4.3.2.1)	fig|227866.17.peg.3676
Amino Acids and Derivatives	Arginine; urea cycle, polyamines	Arginine Biosynthesis extended	Argininosuccinate synthase (EC 6.3.4.5)	fig|227866.17.peg.3677
Amino Acids and Derivatives	Arginine; urea cycle, polyamines	Arginine Biosynthesis extended	N-acetyl-gamma-glutamyl-phosphate reductase (EC 1.2.1.38)	fig|227866.17.peg.1564
Amino Acids and Derivatives	Arginine; urea cycle, polyamines	Arginine Biosynthesis extended	Ornithine carbamoyltransferase (EC 2.1.3.3)	fig|227866.17.peg.1558
Amino Acids and Derivatives	Arginine; urea cycle, polyamines	Arginine Biosynthesis extended	Acetylornithine aminotransferase (EC 2.6.1.11)	fig|227866.17.peg.1561
Amino Acids and Derivatives	Arginine; urea cycle, polyamines	Urea decomposition	Nickel transporter UreH	fig|227866.17.peg.3942
Amino Acids and Derivatives	Arginine; urea cycle, polyamines	Urea decomposition	Urease beta subunit (EC 3.5.1.5)	fig|227866.17.peg.2339
Amino Acids and Derivatives	Arginine; urea cycle, polyamines	Urea decomposition	Urea ABC transporter, ATPase protein UrtE	fig|227866.17.peg.2337
Amino Acids and Derivatives	Arginine; urea cycle, polyamines	Urea decomposition	Urease gamma subunit (EC 3.5.1.5)	fig|227866.17.peg.2338
Amino Acids and Derivatives	Arginine; urea cycle, polyamines	Urea decomposition	Urease alpha subunit (EC 3.5.1.5)	fig|227866.17.peg.2340
Amino Acids and Derivatives	Lysine, threonine, methionine, and cysteine	S-methylmethionine	Homocysteine S-methyltransferase (EC 2.1.1.10)	fig|227866.17.peg.3343
Amino Acids and Derivatives	Lysine, threonine, methionine, and cysteine	S-methylmethionine	S-methylmethionine permease	fig|227866.17.peg.3269
Amino Acids and Derivatives	Lysine, threonine, methionine, and cysteine	Methionine Biosynthesis	Methionine ABC transporter ATP-binding protein	fig|227866.17.peg.2608, fig|227866.17.peg.2763, fig|227866.17.peg.3779
Amino Acids and Derivatives	Lysine, threonine, methionine, and cysteine	Methionine Biosynthesis	S-adenosylmethionine synthetase (EC 2.5.1.6)	fig|227866.17.peg.3793
Amino Acids and Derivatives	Lysine, threonine, methionine, and cysteine	Methionine Biosynthesis	Cystathionine gamma-lyase (EC 4.4.1.1)	fig|227866.17.peg.4228
Amino Acids and Derivatives	Lysine, threonine, methionine, and cysteine	Methionine Biosynthesis	Serine acetyltransferase (EC 2.3.1.30)	fig|227866.17.peg.4250
Amino Acids and Derivatives	Lysine, threonine, methionine, and cysteine	Methionine Biosynthesis	SAM-dependent methlytransferase YrrT	fig|227866.17.peg.3451
Amino Acids and Derivatives	Lysine, threonine, methionine, and cysteine	Methionine Biosynthesis	Homoserine kinase (EC 2.7.1.39)	fig|227866.17.peg.2820, fig|227866.17.peg.3924
Amino Acids and Derivatives	Lysine, threonine, methionine, and cysteine	Methionine Biosynthesis	Homoserine O-succinyltransferase (EC 2.3.1.46)	fig|227866.17.peg.484
Amino Acids and Derivatives	Lysine, threonine, methionine, and cysteine	Methionine Biosynthesis	5-methyltetrahydropteroyltriglutamate--homocysteine methyltransferase (EC 2.1.1.14)	fig|227866.17.peg.1229
Amino Acids and Derivatives	Lysine, threonine, methionine, and cysteine	Methionine Biosynthesis	Cysteine synthase (EC 2.5.1.47)	fig|227866.17.peg.3734, fig|227866.17.peg.4330
Amino Acids and Derivatives	Lysine, threonine, methionine, and cysteine	Methionine Biosynthesis	O-acetylhomoserine sulfhydrylase (EC 2.5.1.49)	fig|227866.17.peg.1489
Amino Acids and Derivatives	Lysine, threonine, methionine, and cysteine	Methionine Biosynthesis	S-ribosylhomocysteine lyase (EC 4.4.1.21)	fig|227866.17.peg.3805
Amino Acids and Derivatives	Lysine, threonine, methionine, and cysteine	Methionine Biosynthesis	5,10-methylenetetrahydrofolate reductase (EC 1.5.1.20)	fig|227866.17.peg.1585
Amino Acids and Derivatives	Lysine, threonine, methionine, and cysteine	Methionine Biosynthesis	Cystathionine beta-synthase (EC 4.2.1.22)	fig|227866.17.peg.4229
Amino Acids and Derivatives	Lysine, threonine, methionine, and cysteine	Methionine Biosynthesis	Homocysteine S-methyltransferase (EC 2.1.1.10)	fig|227866.17.peg.3343
Amino Acids and Derivatives	Lysine, threonine, methionine, and cysteine	Methionine Biosynthesis	Homoserine dehydrogenase (EC 1.1.1.3)	fig|227866.17.peg.2818
Amino Acids and Derivatives	Lysine, threonine, methionine, and cysteine	Methionine Biosynthesis	Methionine ABC transporter substrate-binding protein	fig|227866.17.peg.1785, fig|227866.17.peg.2765
Amino Acids and Derivatives	Lysine, threonine, methionine, and cysteine	Methionine Biosynthesis	Cystathionine gamma-synthase (EC 2.5.1.48)	fig|227866.17.peg.1489, fig|227866.17.peg.1490
Amino Acids and Derivatives	Lysine, threonine, methionine, and cysteine	Methionine Biosynthesis	Cystathionine beta-lyase (EC 4.4.1.8)	fig|227866.17.peg.1488
Amino Acids and Derivatives	Lysine, threonine, methionine, and cysteine	Methionine Biosynthesis	S-adenosylhomocysteine nucleosidase (EC 3.2.2.9)	fig|227866.17.peg.3450
Amino Acids and Derivatives	Lysine, threonine, methionine, and cysteine	Methionine Biosynthesis	Methionine ABC transporter permease protein	fig|227866.17.peg.2764
Amino Acids and Derivatives	Lysine, threonine, methionine, and cysteine	Threonine degradation	Threonine dehydrogenase and related Zn-dependent dehydrogenases	fig|227866.17.peg.1943
Amino Acids and Derivatives	Lysine, threonine, methionine, and cysteine	Threonine degradation	Transcriptional regulator GabR of GABA utilization (GntR family with aminotransferase-like domain)	fig|227866.17.peg.3183
Amino Acids and Derivatives	Lysine, threonine, methionine, and cysteine	Threonine degradation	L-threonine 3-dehydrogenase (EC 1.1.1.103)	fig|227866.17.peg.824
Amino Acids and Derivatives	Lysine, threonine, methionine, and cysteine	Lysine fermentation	Beta-lysine acetyltransferase (EC 2.3.1.-)	fig|227866.17.peg.520
Amino Acids and Derivatives	Lysine, threonine, methionine, and cysteine	Lysine fermentation	Enoyl-CoA hydratase (EC 4.2.1.17)	fig|227866.17.peg.805, fig|227866.17.peg.1707, fig|227866.17.peg.1857, fig|227866.17.peg.3592
Amino Acids and Derivatives	Lysine, threonine, methionine, and cysteine	Lysine fermentation	Butyrate-acetoacetate CoA-transferase subunit B (EC 2.8.3.9)	fig|227866.17.peg.2078
Amino Acids and Derivatives	Lysine, threonine, methionine, and cysteine	Lysine fermentation	Electron transfer flavoprotein, beta subunit	fig|227866.17.peg.3591
Amino Acids and Derivatives	Lysine, threonine, methionine, and cysteine	Lysine fermentation	Lysine 2,3-aminomutase (EC 5.4.3.2)	fig|227866.17.peg.521
Amino Acids and Derivatives	Lysine, threonine, methionine, and cysteine	Lysine fermentation	Electron transfer flavoprotein, alpha subunit	fig|227866.17.peg.3590
Amino Acids and Derivatives	Lysine, threonine, methionine, and cysteine	Lysine fermentation	3-hydroxybutyryl-CoA dehydrogenase (EC 1.1.1.157)	fig|227866.17.peg.247
Amino Acids and Derivatives	Lysine, threonine, methionine, and cysteine	Lysine fermentation	Acetyl-CoA acetyltransferase (EC 2.3.1.9)	fig|227866.17.peg.1655, fig|227866.17.peg.2754
Amino Acids and Derivatives	Lysine, threonine, methionine, and cysteine	Lysine Biosynthesis DAP Pathway, GJO scratch	N-acetyl-L,L-diaminopimelate deacetylase (EC 3.5.1.47)	fig|227866.17.peg.1114, fig|227866.17.peg.2021
Amino Acids and Derivatives	Lysine, threonine, methionine, and cysteine	Lysine Biosynthesis DAP Pathway, GJO scratch	Diaminopimelate epimerase (EC 5.1.1.7)	fig|227866.17.peg.2827
Amino Acids and Derivatives	Lysine, threonine, methionine, and cysteine	Lysine Biosynthesis DAP Pathway, GJO scratch	Aspartate-semialdehyde dehydrogenase (EC 1.2.1.11)	fig|227866.17.peg.847
Amino Acids and Derivatives	Lysine, threonine, methionine, and cysteine	Lysine Biosynthesis DAP Pathway, GJO scratch	4-hydroxy-tetrahydrodipicolinate synthase (EC 4.3.3.7)	fig|227866.17.peg.845
Amino Acids and Derivatives	Lysine, threonine, methionine, and cysteine	Lysine Biosynthesis DAP Pathway, GJO scratch	Diaminopimelate decarboxylase (EC 4.1.1.20)	fig|227866.17.peg.332
Amino Acids and Derivatives	Lysine, threonine, methionine, and cysteine	Lysine Biosynthesis DAP Pathway, GJO scratch	N-acetyl-L,L-diaminopimelate aminotransferase (EC 2.6.1.-)	fig|227866.17.peg.1133
Amino Acids and Derivatives	Lysine, threonine, methionine, and cysteine	Lysine Biosynthesis DAP Pathway, GJO scratch	2,3,4,5-tetrahydropyridine-2,6-dicarboxylate N-acetyltransferase (EC 2.3.1.89)	fig|227866.17.peg.1115
Amino Acids and Derivatives	Lysine, threonine, methionine, and cysteine	Lysine Biosynthesis DAP Pathway, GJO scratch	4-hydroxy-tetrahydrodipicolinate reductase (EC 1.17.1.8)	fig|227866.17.peg.423
Amino Acids and Derivatives	Lysine, threonine, methionine, and cysteine	Lysine Biosynthesis DAP Pathway, GJO scratch	Aspartokinase (EC 2.7.2.4)	fig|227866.17.peg.846, fig|227866.17.peg.3193, fig|227866.17.peg.3583
Amino Acids and Derivatives	Lysine, threonine, methionine, and cysteine	Methionine Degradation	Methionine ABC transporter substrate-binding protein	fig|227866.17.peg.1785, fig|227866.17.peg.2765
Amino Acids and Derivatives	Lysine, threonine, methionine, and cysteine	Methionine Degradation	Methionine ABC transporter ATP-binding protein	fig|227866.17.peg.2608, fig|227866.17.peg.2763, fig|227866.17.peg.3779
Amino Acids and Derivatives	Lysine, threonine, methionine, and cysteine	Methionine Degradation	S-adenosylmethionine synthetase (EC 2.5.1.6)	fig|227866.17.peg.3793
Amino Acids and Derivatives	Lysine, threonine, methionine, and cysteine	Methionine Degradation	Cystathionine gamma-lyase (EC 4.4.1.1)	fig|227866.17.peg.4228
Amino Acids and Derivatives	Lysine, threonine, methionine, and cysteine	Methionine Degradation	S-adenosylhomocysteine nucleosidase (EC 3.2.2.9)	fig|227866.17.peg.3450
Amino Acids and Derivatives	Lysine, threonine, methionine, and cysteine	Methionine Degradation	Methionine ABC transporter permease protein	fig|227866.17.peg.2764
Amino Acids and Derivatives	Lysine, threonine, methionine, and cysteine	Methionine Degradation	S-ribosylhomocysteine lyase (EC 4.4.1.21)	fig|227866.17.peg.3805
Amino Acids and Derivatives	Lysine, threonine, methionine, and cysteine	Methionine Degradation	Cystathionine beta-synthase (EC 4.2.1.22)	fig|227866.17.peg.4229
Amino Acids and Derivatives	Lysine, threonine, methionine, and cysteine	Threonine and Homoserine Biosynthesis	Homoserine dehydrogenase (EC 1.1.1.3)	fig|227866.17.peg.2818
Amino Acids and Derivatives	Lysine, threonine, methionine, and cysteine	Threonine and Homoserine Biosynthesis	Aspartate-semialdehyde dehydrogenase (EC 1.2.1.11)	fig|227866.17.peg.847
Amino Acids and Derivatives	Lysine, threonine, methionine, and cysteine	Threonine and Homoserine Biosynthesis	Aspartate aminotransferase (EC 2.6.1.1)	fig|227866.17.peg.436, fig|227866.17.peg.1598, fig|227866.17.peg.1736, fig|227866.17.peg.2226, fig|227866.17.peg.2906, fig|227866.17.peg.3049, fig|227866.17.peg.3072, fig|227866.17.peg.3221
Amino Acids and Derivatives	Lysine, threonine, methionine, and cysteine	Threonine and Homoserine Biosynthesis	Threonine synthase (EC 4.2.3.1)	fig|227866.17.peg.2819
Amino Acids and Derivatives	Lysine, threonine, methionine, and cysteine	Threonine and Homoserine Biosynthesis	Homoserine kinase (EC 2.7.1.39)	fig|227866.17.peg.2820, fig|227866.17.peg.3924
Amino Acids and Derivatives	Lysine, threonine, methionine, and cysteine	Threonine and Homoserine Biosynthesis	Aspartokinase (EC 2.7.2.4)	fig|227866.17.peg.846, fig|227866.17.peg.3193, fig|227866.17.peg.3583
Amino Acids and Derivatives	Lysine, threonine, methionine, and cysteine	Methionine Salvage	Methylthioribulose-1-phosphate dehydratase (EC 4.2.1.109)	fig|227866.17.peg.1181
Amino Acids and Derivatives	Lysine, threonine, methionine, and cysteine	Methionine Salvage	2,3-diketo-5-methylthiopentyl-1-phosphate enolase (EC 5.3.2.5)	fig|227866.17.peg.1183
Amino Acids and Derivatives	Lysine, threonine, methionine, and cysteine	Methionine Salvage	Glutamine-dependent 2-keto-4-methylthiobutyrate transaminase	fig|227866.17.peg.1184
Amino Acids and Derivatives	Lysine, threonine, methionine, and cysteine	Methionine Salvage	5-methylthioribose kinase (EC 2.7.1.100)	fig|227866.17.peg.1186
Amino Acids and Derivatives	Lysine, threonine, methionine, and cysteine	Methionine Salvage	2-hydroxy-3-keto-5-methylthiopentenyl-1-phosphate phosphatase	fig|227866.17.peg.1182
Amino Acids and Derivatives	Lysine, threonine, methionine, and cysteine	Methionine Salvage	Methylthioribose-1-phosphate isomerase (EC 5.3.1.23)	fig|227866.17.peg.1187
Amino Acids and Derivatives	Lysine, threonine, methionine, and cysteine	Methionine Salvage	1,2-dihydroxy-3-keto-5-methylthiopentene dioxygenase (EC 1.13.11.54)	fig|227866.17.peg.1180
Amino Acids and Derivatives	Lysine, threonine, methionine, and cysteine	Methionine Salvage	5'-methylthioadenosine nucleosidase (EC 3.2.2.16)	fig|227866.17.peg.3450
Amino Acids and Derivatives	Lysine, threonine, methionine, and cysteine	Cysteine Biosynthesis	Cystathionine gamma-lyase (EC 4.4.1.1)	fig|227866.17.peg.4228
Amino Acids and Derivatives	Lysine, threonine, methionine, and cysteine	Cysteine Biosynthesis	Cys regulon transcriptional activator CysB	fig|227866.17.peg.1119
Amino Acids and Derivatives	Lysine, threonine, methionine, and cysteine	Cysteine Biosynthesis	Adenylylsulfate kinase (EC 2.7.1.25)	fig|227866.17.peg.962, fig|227866.17.peg.1595
Amino Acids and Derivatives	Lysine, threonine, methionine, and cysteine	Cysteine Biosynthesis	Serine acetyltransferase (EC 2.3.1.30)	fig|227866.17.peg.4250
Amino Acids and Derivatives	Lysine, threonine, methionine, and cysteine	Cysteine Biosynthesis	Cysteine synthase (EC 2.5.1.47)	fig|227866.17.peg.3734, fig|227866.17.peg.4330
Amino Acids and Derivatives	Lysine, threonine, methionine, and cysteine	Cysteine Biosynthesis	Phosphoadenylyl-sulfate reductase [thioredoxin] (EC 1.8.4.8)	fig|227866.17.peg.965, fig|227866.17.peg.1593
Amino Acids and Derivatives	Lysine, threonine, methionine, and cysteine	Cysteine Biosynthesis	Sulfate permease	fig|227866.17.peg.2551, fig|227866.17.peg.3417
Amino Acids and Derivatives	Lysine, threonine, methionine, and cysteine	Cysteine Biosynthesis	Sulfite reductase [NADPH] hemoprotein beta-component (EC 1.8.1.2)	fig|227866.17.peg.2684
Amino Acids and Derivatives	Lysine, threonine, methionine, and cysteine	Cysteine Biosynthesis	Sulfite reductase [NADPH] flavoprotein alpha-component (EC 1.8.1.2)	fig|227866.17.peg.2683
Amino Acids and Derivatives	Lysine, threonine, methionine, and cysteine	Cysteine Biosynthesis	Cystathionine beta-synthase (EC 4.2.1.22)	fig|227866.17.peg.4229
Amino Acids and Derivatives	Lysine, threonine, methionine, and cysteine	Lysine Biosynthesis DAP Pathway	N-acetyl-L,L-diaminopimelate deacetylase (EC 3.5.1.47)	fig|227866.17.peg.1114, fig|227866.17.peg.2021
Amino Acids and Derivatives	Lysine, threonine, methionine, and cysteine	Lysine Biosynthesis DAP Pathway	Diaminopimelate epimerase (EC 5.1.1.7)	fig|227866.17.peg.2827
Amino Acids and Derivatives	Lysine, threonine, methionine, and cysteine	Lysine Biosynthesis DAP Pathway	Aspartate-semialdehyde dehydrogenase (EC 1.2.1.11)	fig|227866.17.peg.847
Amino Acids and Derivatives	Lysine, threonine, methionine, and cysteine	Lysine Biosynthesis DAP Pathway	4-hydroxy-tetrahydrodipicolinate synthase (EC 4.3.3.7)	fig|227866.17.peg.845
Amino Acids and Derivatives	Lysine, threonine, methionine, and cysteine	Lysine Biosynthesis DAP Pathway	Diaminopimelate decarboxylase (EC 4.1.1.20)	fig|227866.17.peg.332
Amino Acids and Derivatives	Lysine, threonine, methionine, and cysteine	Lysine Biosynthesis DAP Pathway	N-acetyl-L,L-diaminopimelate aminotransferase (EC 2.6.1.-)	fig|227866.17.peg.1133
Amino Acids and Derivatives	Lysine, threonine, methionine, and cysteine	Lysine Biosynthesis DAP Pathway	2,3,4,5-tetrahydropyridine-2,6-dicarboxylate N-acetyltransferase (EC 2.3.1.89)	fig|227866.17.peg.1115
Amino Acids and Derivatives	Lysine, threonine, methionine, and cysteine	Lysine Biosynthesis DAP Pathway	4-hydroxy-tetrahydrodipicolinate reductase (EC 1.17.1.8)	fig|227866.17.peg.423
Amino Acids and Derivatives	Lysine, threonine, methionine, and cysteine	Lysine Biosynthesis DAP Pathway	Aspartokinase (EC 2.7.2.4)	fig|227866.17.peg.846, fig|227866.17.peg.3193, fig|227866.17.peg.3583
Amino Acids and Derivatives	Lysine, threonine, methionine, and cysteine	Lysine degradation	Beta-lysine acetyltransferase (EC 2.3.1.-)	fig|227866.17.peg.520
Amino Acids and Derivatives	Lysine, threonine, methionine, and cysteine	Lysine degradation	Lysine decarboxylase (EC 4.1.1.18)	fig|227866.17.peg.4377
Amino Acids and Derivatives	Lysine, threonine, methionine, and cysteine	Lysine degradation	L-lysine permease	fig|227866.17.peg.4211
Amino Acids and Derivatives	Lysine, threonine, methionine, and cysteine	Lysine degradation	Lysine 2,3-aminomutase (EC 5.4.3.2)	fig|227866.17.peg.521
Amino Acids and Derivatives	Branched-chain amino acids	Isoleucine degradation	Transcriptional regulator BkdR of isoleucine and valine catabolism operon	fig|227866.17.peg.253
Amino Acids and Derivatives	Branched-chain amino acids	Isoleucine degradation	Branched-chain amino acid aminotransferase (EC 2.6.1.42)	fig|227866.17.peg.2127, fig|227866.17.peg.3345
Amino Acids and Derivatives	Branched-chain amino acids	Isoleucine degradation	Butyrate kinase (EC 2.7.2.7)	fig|227866.17.peg.256
Amino Acids and Derivatives	Branched-chain amino acids	Isoleucine degradation	Branched-chain alpha-keto acid dehydrogenase, E1 component, alpha subunit (EC 1.2.4.4)	fig|227866.17.peg.258
Amino Acids and Derivatives	Branched-chain amino acids	Isoleucine degradation	Enoyl-CoA hydratase [isoleucine degradation] (EC 4.2.1.17)	fig|227866.17.peg.2753
Amino Acids and Derivatives	Branched-chain amino acids	Isoleucine degradation	Enoyl-CoA hydratase (EC 4.2.1.17)	fig|227866.17.peg.805, fig|227866.17.peg.1707, fig|227866.17.peg.1857, fig|227866.17.peg.3592
Amino Acids and Derivatives	Branched-chain amino acids	Isoleucine degradation	Dihydrolipoamide acyltransferase component of branched-chain alpha-keto acid dehydrogenase complex (EC 2.3.1.168)	fig|227866.17.peg.260
Amino Acids and Derivatives	Branched-chain amino acids	Isoleucine degradation	3-ketoacyl-CoA thiolase (EC 2.3.1.16)	fig|227866.17.peg.1655, fig|227866.17.peg.2754
Amino Acids and Derivatives	Branched-chain amino acids	Isoleucine degradation	Branched-chain alpha-keto acid dehydrogenase, E1 component, beta subunit (EC 1.2.4.4)	fig|227866.17.peg.259
Amino Acids and Derivatives	Branched-chain amino acids	Isoleucine degradation	3-hydroxyacyl-CoA dehydrogenase (EC 1.1.1.35)	fig|227866.17.peg.2753
Amino Acids and Derivatives	Branched-chain amino acids	Isoleucine degradation	3-ketoacyl-CoA thiolase [isoleucine degradation] (EC 2.3.1.16)	fig|227866.17.peg.246
Amino Acids and Derivatives	Branched-chain amino acids	Isoleucine degradation	Dihydrolipoamide dehydrogenase of branched-chain alpha-keto acid dehydrogenase (EC 1.8.1.4)	fig|227866.17.peg.257
Amino Acids and Derivatives	Branched-chain amino acids	Leucine Degradation and HMG-CoA Metabolism	Hydroxymethylglutaryl-CoA lyase (EC 4.1.3.4)	fig|227866.17.peg.683
Amino Acids and Derivatives	Branched-chain amino acids	Leucine Degradation and HMG-CoA Metabolism	Branched-chain amino acid aminotransferase (EC 2.6.1.42)	fig|227866.17.peg.2127, fig|227866.17.peg.3345
Amino Acids and Derivatives	Branched-chain amino acids	Leucine Degradation and HMG-CoA Metabolism	Methylglutaconyl-CoA hydratase (EC 4.2.1.18)	fig|227866.17.peg.684, fig|227866.17.peg.806
Amino Acids and Derivatives	Branched-chain amino acids	Leucine Degradation and HMG-CoA Metabolism	Methylcrotonyl-CoA carboxylase carboxyl transferase subunit (EC 6.4.1.4)	fig|227866.17.peg.685
Amino Acids and Derivatives	Branched-chain amino acids	Leucine Degradation and HMG-CoA Metabolism	Branched-chain alpha-keto acid dehydrogenase, E1 component, alpha subunit (EC 1.2.4.4)	fig|227866.17.peg.258
Amino Acids and Derivatives	Branched-chain amino acids	Leucine Degradation and HMG-CoA Metabolism	Biotin carboxylase of methylcrotonyl-CoA carboxylase (EC 6.3.4.14)	fig|227866.17.peg.681
Amino Acids and Derivatives	Branched-chain amino acids	Leucine Degradation and HMG-CoA Metabolism	Isovaleryl-CoA dehydrogenase (EC 1.3.8.4)	fig|227866.17.peg.679
Amino Acids and Derivatives	Branched-chain amino acids	Leucine Degradation and HMG-CoA Metabolism	Biotin carboxyl carrier protein of methylcrotonyl-CoA carboxylase	fig|227866.17.peg.682
Amino Acids and Derivatives	Branched-chain amino acids	Leucine Degradation and HMG-CoA Metabolism	Leucine dehydrogenase (EC 1.4.1.9)	fig|227866.17.peg.255
Amino Acids and Derivatives	Branched-chain amino acids	Leucine Degradation and HMG-CoA Metabolism	Dihydrolipoamide acyltransferase component of branched-chain alpha-keto acid dehydrogenase complex (EC 2.3.1.168)	fig|227866.17.peg.260
Amino Acids and Derivatives	Branched-chain amino acids	Leucine Degradation and HMG-CoA Metabolism	Succinyl-CoA:3-ketoacid-coenzyme A transferase subunit A (EC 2.8.3.5)	fig|227866.17.peg.2077
Amino Acids and Derivatives	Branched-chain amino acids	Leucine Degradation and HMG-CoA Metabolism	Branched-chain alpha-keto acid dehydrogenase, E1 component, beta subunit (EC 1.2.4.4)	fig|227866.17.peg.259
Amino Acids and Derivatives	Branched-chain amino acids	Leucine Degradation and HMG-CoA Metabolism	Hydroxymethylglutaryl-CoA synthase (EC 2.3.3.10)	fig|227866.17.peg.807
Amino Acids and Derivatives	Branched-chain amino acids	Leucine Degradation and HMG-CoA Metabolism	Dihydrolipoamide dehydrogenase of branched-chain alpha-keto acid dehydrogenase (EC 1.8.1.4)	fig|227866.17.peg.257
Amino Acids and Derivatives	Branched-chain amino acids	Leucine Degradation and HMG-CoA Metabolism	Acetoacetyl-CoA synthetase [leucine] (EC 6.2.1.16)	fig|227866.17.peg.680
Amino Acids and Derivatives	Branched-chain amino acids	Branched-Chain Amino Acid Biosynthesis	3-isopropylmalate dehydratase small subunit (EC 4.2.1.33)	fig|227866.17.peg.3558
Amino Acids and Derivatives	Branched-chain amino acids	Branched-Chain Amino Acid Biosynthesis	2-isopropylmalate synthase (EC 2.3.3.13)	fig|227866.17.peg.3561
Amino Acids and Derivatives	Branched-chain amino acids	Branched-Chain Amino Acid Biosynthesis	Branched-chain amino acid aminotransferase (EC 2.6.1.42)	fig|227866.17.peg.2127, fig|227866.17.peg.3345
Amino Acids and Derivatives	Branched-chain amino acids	Branched-Chain Amino Acid Biosynthesis	3-isopropylmalate dehydrogenase (EC 1.1.1.85)	fig|227866.17.peg.3560
Amino Acids and Derivatives	Branched-chain amino acids	Branched-Chain Amino Acid Biosynthesis	3-isopropylmalate dehydratase large subunit (EC 4.2.1.33)	fig|227866.17.peg.3559
Amino Acids and Derivatives	Branched-chain amino acids	Branched-Chain Amino Acid Biosynthesis	Leucine dehydrogenase (EC 1.4.1.9)	fig|227866.17.peg.255
Amino Acids and Derivatives	Branched-chain amino acids	Branched-Chain Amino Acid Biosynthesis	Ketol-acid reductoisomerase (EC 1.1.1.86)	fig|227866.17.peg.3562
Amino Acids and Derivatives	Branched-chain amino acids	Branched-Chain Amino Acid Biosynthesis	Threonine dehydratase biosynthetic (EC 4.3.1.19)	fig|227866.17.peg.497
Amino Acids and Derivatives	Branched-chain amino acids	Branched-Chain Amino Acid Biosynthesis	Acetolactate synthase large subunit (EC 2.2.1.6)	fig|227866.17.peg.3564
Amino Acids and Derivatives	Branched-chain amino acids	Branched-Chain Amino Acid Biosynthesis	Dihydroxy-acid dehydratase (EC 4.2.1.9)	fig|227866.17.peg.488
Amino Acids and Derivatives	Branched-chain amino acids	Branched-Chain Amino Acid Biosynthesis	Leucine-responsive regulatory protein, regulator for leucine (or lrp) regulon and high-affinity branched-chain amino acid transport system	fig|227866.17.peg.3143, fig|227866.17.peg.3912
Amino Acids and Derivatives	Branched-chain amino acids	Branched-Chain Amino Acid Biosynthesis	Acetolactate synthase small subunit (EC 2.2.1.6)	fig|227866.17.peg.3563
Amino Acids and Derivatives	Branched-chain amino acids	HMG CoA Synthesis	Hydroxymethylglutaryl-CoA lyase (EC 4.1.3.4)	fig|227866.17.peg.683
Amino Acids and Derivatives	Branched-chain amino acids	HMG CoA Synthesis	Methylglutaconyl-CoA hydratase (EC 4.2.1.18)	fig|227866.17.peg.684, fig|227866.17.peg.806
Amino Acids and Derivatives	Branched-chain amino acids	HMG CoA Synthesis	Methylcrotonyl-CoA carboxylase carboxyl transferase subunit (EC 6.4.1.4)	fig|227866.17.peg.685
Amino Acids and Derivatives	Branched-chain amino acids	HMG CoA Synthesis	Biotin carboxylase of methylcrotonyl-CoA carboxylase (EC 6.3.4.14)	fig|227866.17.peg.681
Amino Acids and Derivatives	Branched-chain amino acids	HMG CoA Synthesis	Acetoacetyl-CoA synthetase [leucine] (EC 6.2.1.16)	fig|227866.17.peg.680
Amino Acids and Derivatives	Branched-chain amino acids	HMG CoA Synthesis	Isovaleryl-CoA dehydrogenase (EC 1.3.8.4)	fig|227866.17.peg.679
Amino Acids and Derivatives	Branched-chain amino acids	HMG CoA Synthesis	Biotin carboxyl carrier protein of methylcrotonyl-CoA carboxylase	fig|227866.17.peg.682
Amino Acids and Derivatives	Branched-chain amino acids	Valine degradation	Transcriptional regulator BkdR of isoleucine and valine catabolism operon	fig|227866.17.peg.253
Amino Acids and Derivatives	Branched-chain amino acids	Valine degradation	Branched-chain amino acid aminotransferase (EC 2.6.1.42)	fig|227866.17.peg.2127, fig|227866.17.peg.3345
Amino Acids and Derivatives	Branched-chain amino acids	Valine degradation	Butyrate kinase (EC 2.7.2.7)	fig|227866.17.peg.256
Amino Acids and Derivatives	Branched-chain amino acids	Valine degradation	Branched-chain alpha-keto acid dehydrogenase, E1 component, alpha subunit (EC 1.2.4.4)	fig|227866.17.peg.258
Amino Acids and Derivatives	Branched-chain amino acids	Valine degradation	Enoyl-CoA hydratase (EC 4.2.1.17)	fig|227866.17.peg.805, fig|227866.17.peg.1707, fig|227866.17.peg.1857, fig|227866.17.peg.3592
Amino Acids and Derivatives	Branched-chain amino acids	Valine degradation	Dihydrolipoamide acyltransferase component of branched-chain alpha-keto acid dehydrogenase complex (EC 2.3.1.168)	fig|227866.17.peg.260
Amino Acids and Derivatives	Branched-chain amino acids	Valine degradation	Branched-chain alpha-keto acid dehydrogenase, E1 component, beta subunit (EC 1.2.4.4)	fig|227866.17.peg.259
Amino Acids and Derivatives	Branched-chain amino acids	Valine degradation	3-hydroxyacyl-CoA dehydrogenase (EC 1.1.1.35)	fig|227866.17.peg.2753
Amino Acids and Derivatives	Branched-chain amino acids	Valine degradation	Dihydrolipoamide dehydrogenase of branched-chain alpha-keto acid dehydrogenase (EC 1.8.1.4)	fig|227866.17.peg.257
Amino Acids and Derivatives	Branched-chain amino acids	Leucine Biosynthesis	3-isopropylmalate dehydratase small subunit (EC 4.2.1.33)	fig|227866.17.peg.3558
Amino Acids and Derivatives	Branched-chain amino acids	Leucine Biosynthesis	3-isopropylmalate dehydratase large subunit (EC 4.2.1.33)	fig|227866.17.peg.3559
Amino Acids and Derivatives	Branched-chain amino acids	Leucine Biosynthesis	2-isopropylmalate synthase (EC 2.3.3.13)	fig|227866.17.peg.3561
Amino Acids and Derivatives	Branched-chain amino acids	Leucine Biosynthesis	Branched-chain amino acid aminotransferase (EC 2.6.1.42)	fig|227866.17.peg.2127, fig|227866.17.peg.3345
Amino Acids and Derivatives	Branched-chain amino acids	Leucine Biosynthesis	3-isopropylmalate dehydrogenase (EC 1.1.1.85)	fig|227866.17.peg.3560
Amino Acids and Derivatives	Aromatic amino acids and derivatives	Common Pathway For Synthesis of Aromatic Compounds (DAHP synthase to chorismate)	5-Enolpyruvylshikimate-3-phosphate synthase (EC 2.5.1.19)	fig|227866.17.peg.412
Amino Acids and Derivatives	Aromatic amino acids and derivatives	Common Pathway For Synthesis of Aromatic Compounds (DAHP synthase to chorismate)	3-dehydroquinate dehydratase II (EC 4.2.1.10)	fig|227866.17.peg.212
Amino Acids and Derivatives	Aromatic amino acids and derivatives	Common Pathway For Synthesis of Aromatic Compounds (DAHP synthase to chorismate)	3-dehydroquinate synthase (EC 4.2.3.4)	fig|227866.17.peg.402
Amino Acids and Derivatives	Aromatic amino acids and derivatives	Common Pathway For Synthesis of Aromatic Compounds (DAHP synthase to chorismate)	Chorismate synthase (EC 4.2.3.5)	fig|227866.17.peg.401
Amino Acids and Derivatives	Aromatic amino acids and derivatives	Common Pathway For Synthesis of Aromatic Compounds (DAHP synthase to chorismate)	3-dehydroquinate dehydratase I (EC 4.2.1.10)	fig|227866.17.peg.360
Amino Acids and Derivatives	Aromatic amino acids and derivatives	Common Pathway For Synthesis of Aromatic Compounds (DAHP synthase to chorismate)	Shikimate kinase I (EC 2.7.1.71)	fig|227866.17.peg.3264
Amino Acids and Derivatives	Aromatic amino acids and derivatives	Common Pathway For Synthesis of Aromatic Compounds (DAHP synthase to chorismate)	2-keto-3-deoxy-D-arabino-heptulosonate-7-phosphate synthase I beta (EC 2.5.1.54)	fig|227866.17.peg.3711
Amino Acids and Derivatives	Aromatic amino acids and derivatives	Common Pathway For Synthesis of Aromatic Compounds (DAHP synthase to chorismate)	Shikimate 5-dehydrogenase I alpha (EC 1.1.1.25)	fig|227866.17.peg.86
Amino Acids and Derivatives	Aromatic amino acids and derivatives	Chorismate Synthesis	5-Enolpyruvylshikimate-3-phosphate synthase (EC 2.5.1.19)	fig|227866.17.peg.412
Amino Acids and Derivatives	Aromatic amino acids and derivatives	Chorismate Synthesis	Chorismate mutase I (EC 5.4.99.5)	fig|227866.17.peg.3711
Amino Acids and Derivatives	Aromatic amino acids and derivatives	Chorismate Synthesis	3-dehydroquinate dehydratase II (EC 4.2.1.10)	fig|227866.17.peg.212
Amino Acids and Derivatives	Aromatic amino acids and derivatives	Chorismate Synthesis	Prephenate dehydratase (EC 4.2.1.51)	fig|227866.17.peg.3519
Amino Acids and Derivatives	Aromatic amino acids and derivatives	Chorismate Synthesis	Chorismate mutase II (EC 5.4.99.5)	fig|227866.17.peg.403
Amino Acids and Derivatives	Aromatic amino acids and derivatives	Chorismate Synthesis	3-dehydroquinate synthase (EC 4.2.3.4)	fig|227866.17.peg.402
Amino Acids and Derivatives	Aromatic amino acids and derivatives	Chorismate Synthesis	Chorismate synthase (EC 4.2.3.5)	fig|227866.17.peg.401
Amino Acids and Derivatives	Aromatic amino acids and derivatives	Chorismate Synthesis	Prephenate dehydrogenase (EC 1.3.1.12)	fig|227866.17.peg.411
Amino Acids and Derivatives	Aromatic amino acids and derivatives	Chorismate Synthesis	3-dehydroquinate dehydratase I (EC 4.2.1.10)	fig|227866.17.peg.360
Amino Acids and Derivatives	Aromatic amino acids and derivatives	Chorismate Synthesis	Shikimate kinase I (EC 2.7.1.71)	fig|227866.17.peg.3264
Amino Acids and Derivatives	Aromatic amino acids and derivatives	Chorismate Synthesis	Shikimate 5-dehydrogenase I alpha (EC 1.1.1.25)	fig|227866.17.peg.86
Amino Acids and Derivatives	Aromatic amino acids and derivatives	Chorismate Synthesis	2-keto-3-deoxy-D-arabino-heptulosonate-7-phosphate synthase I beta (EC 2.5.1.54)	fig|227866.17.peg.3711
Amino Acids and Derivatives	Aromatic amino acids and derivatives	Chorismate: Intermediate for synthesis of Tryptophan, PAPA antibiotics, PABA, 3-hydroxyanthranilate and more.	Phosphoribosylformimino-5-aminoimidazole carboxamide ribotide isomerase (EC 5.3.1.16)	fig|227866.17.peg.2528
Amino Acids and Derivatives	Aromatic amino acids and derivatives	Chorismate: Intermediate for synthesis of Tryptophan, PAPA antibiotics, PABA, 3-hydroxyanthranilate and more.	Isochorismatase (EC 3.3.2.1) of siderophore biosynthesis	fig|227866.17.peg.2847
Amino Acids and Derivatives	Aromatic amino acids and derivatives	Chorismate: Intermediate for synthesis of Tryptophan, PAPA antibiotics, PABA, 3-hydroxyanthranilate and more.	Anthranilate synthase, amidotransferase component (EC 4.1.3.27)	fig|227866.17.peg.4328
Amino Acids and Derivatives	Aromatic amino acids and derivatives	Chorismate: Intermediate for synthesis of Tryptophan, PAPA antibiotics, PABA, 3-hydroxyanthranilate and more.	Aminodeoxychorismate lyase (EC 4.1.3.38)	fig|227866.17.peg.4327
Amino Acids and Derivatives	Aromatic amino acids and derivatives	Chorismate: Intermediate for synthesis of Tryptophan, PAPA antibiotics, PABA, 3-hydroxyanthranilate and more.	Tryptophan synthase alpha chain (EC 4.2.1.20)	fig|227866.17.peg.409
Amino Acids and Derivatives	Aromatic amino acids and derivatives	Chorismate: Intermediate for synthesis of Tryptophan, PAPA antibiotics, PABA, 3-hydroxyanthranilate and more.	Anthranilate phosphoribosyltransferase (EC 2.4.2.18)	fig|227866.17.peg.405
Amino Acids and Derivatives	Aromatic amino acids and derivatives	Chorismate: Intermediate for synthesis of Tryptophan, PAPA antibiotics, PABA, 3-hydroxyanthranilate and more.	Tryptophan synthase beta chain (EC 4.2.1.20)	fig|227866.17.peg.408
Amino Acids and Derivatives	Aromatic amino acids and derivatives	Chorismate: Intermediate for synthesis of Tryptophan, PAPA antibiotics, PABA, 3-hydroxyanthranilate and more.	Indole-3-glycerol phosphate synthase (EC 4.1.1.48)	fig|227866.17.peg.406
Amino Acids and Derivatives	Aromatic amino acids and derivatives	Chorismate: Intermediate for synthesis of Tryptophan, PAPA antibiotics, PABA, 3-hydroxyanthranilate and more.	Anthranilate synthase, aminase component (EC 4.1.3.27)	fig|227866.17.peg.404
Amino Acids and Derivatives	Aromatic amino acids and derivatives	Chorismate: Intermediate for synthesis of Tryptophan, PAPA antibiotics, PABA, 3-hydroxyanthranilate and more.	Phosphoribosylanthranilate isomerase (EC 5.3.1.24)	fig|227866.17.peg.407
Amino Acids and Derivatives	Aromatic amino acids and derivatives	Chorismate: Intermediate for synthesis of Tryptophan, PAPA antibiotics, PABA, 3-hydroxyanthranilate and more.	Isochorismate synthase (EC 5.4.4.2) of siderophore biosynthesis	fig|227866.17.peg.2845
Amino Acids and Derivatives	Aromatic amino acids and derivatives	Chorismate: Intermediate for synthesis of Tryptophan, PAPA antibiotics, PABA, 3-hydroxyanthranilate and more.	Para-aminobenzoate synthase, aminase component (EC 2.6.1.85)	fig|227866.17.peg.4329
Amino Acids and Derivatives	Aromatic amino acids and derivatives	Chorismate: Intermediate for synthesis of Tryptophan, PAPA antibiotics, PABA, 3-hydroxyanthranilate and more.	Para-aminobenzoate synthase, amidotransferase component (EC 2.6.1.85)	fig|227866.17.peg.4328
Amino Acids and Derivatives	Aromatic amino acids and derivatives	Phenylalanine and Tyrosine Branches from Chorismate	Chorismate mutase I (EC 5.4.99.5)	fig|227866.17.peg.3711
Amino Acids and Derivatives	Aromatic amino acids and derivatives	Phenylalanine and Tyrosine Branches from Chorismate	Prephenate dehydratase (EC 4.2.1.51)	fig|227866.17.peg.3519
Amino Acids and Derivatives	Aromatic amino acids and derivatives	Phenylalanine and Tyrosine Branches from Chorismate	Biosynthetic Aromatic amino acid aminotransferase beta (EC 2.6.1.57)	fig|227866.17.peg.410
Amino Acids and Derivatives	Aromatic amino acids and derivatives	Phenylalanine and Tyrosine Branches from Chorismate	Chorismate mutase II (EC 5.4.99.5)	fig|227866.17.peg.403
Amino Acids and Derivatives	Aromatic amino acids and derivatives	Phenylalanine and Tyrosine Branches from Chorismate	Prephenate dehydrogenase (EC 1.3.1.12)	fig|227866.17.peg.411
Amino Acids and Derivatives	Aromatic amino acids and derivatives	Phenylalanine and Tyrosine Branches from Chorismate	Biosynthetic Aromatic amino acid aminotransferase alpha (EC 2.6.1.57)	fig|227866.17.peg.1736
Amino Acids and Derivatives	Aromatic amino acids and derivatives	Tryptophan synthesis	Anthranilate synthase, amidotransferase component (EC 4.1.3.27)	fig|227866.17.peg.4328
Amino Acids and Derivatives	Aromatic amino acids and derivatives	Tryptophan synthesis	Aminodeoxychorismate lyase (EC 4.1.3.38)	fig|227866.17.peg.4327
Amino Acids and Derivatives	Aromatic amino acids and derivatives	Tryptophan synthesis	Tryptophan synthase alpha chain (EC 4.2.1.20)	fig|227866.17.peg.409
Amino Acids and Derivatives	Aromatic amino acids and derivatives	Tryptophan synthesis	Para-aminobenzoate synthase, aminase component (EC 2.6.1.85)	fig|227866.17.peg.4329
Amino Acids and Derivatives	Aromatic amino acids and derivatives	Tryptophan synthesis	Anthranilate phosphoribosyltransferase (EC 2.4.2.18)	fig|227866.17.peg.405
Amino Acids and Derivatives	Aromatic amino acids and derivatives	Tryptophan synthesis	Tryptophan synthase beta chain (EC 4.2.1.20)	fig|227866.17.peg.408
Amino Acids and Derivatives	Aromatic amino acids and derivatives	Tryptophan synthesis	Indole-3-glycerol phosphate synthase (EC 4.1.1.48)	fig|227866.17.peg.406
Amino Acids and Derivatives	Aromatic amino acids and derivatives	Tryptophan synthesis	Para-aminobenzoate synthase, amidotransferase component (EC 2.6.1.85)	fig|227866.17.peg.4328
Amino Acids and Derivatives	Aromatic amino acids and derivatives	Tryptophan synthesis	Anthranilate synthase, aminase component (EC 4.1.3.27)	fig|227866.17.peg.404
Amino Acids and Derivatives	Aromatic amino acids and derivatives	Tryptophan synthesis	Phosphoribosylanthranilate isomerase (EC 5.3.1.24)	fig|227866.17.peg.407
Amino Acids and Derivatives	Proline and 4-hydroxyproline	Proline Synthesis	Pyrroline-5-carboxylate reductase (EC 1.5.1.2)	fig|227866.17.peg.285, fig|227866.17.peg.660
Amino Acids and Derivatives	Proline and 4-hydroxyproline	Proline Synthesis	Gamma-glutamyl phosphate reductase (EC 1.2.1.41)	fig|227866.17.peg.1235
Amino Acids and Derivatives	Proline and 4-hydroxyproline	Proline Synthesis	RNA-binding C-terminal domain PUA	fig|227866.17.peg.661, fig|227866.17.peg.1236
Amino Acids and Derivatives	Proline and 4-hydroxyproline	Proline Synthesis	Pyrroline-5-carboxylate reductase (EC 1.5.1.2), ProG-like	fig|227866.17.peg.1258
Amino Acids and Derivatives	Proline and 4-hydroxyproline	Proline Synthesis	Glutamate 5-kinase (EC 2.7.2.11)	fig|227866.17.peg.661, fig|227866.17.peg.1236
Amino Acids and Derivatives	Proline and 4-hydroxyproline	A Hypothetical Protein Related to Proline Metabolism	Hypothetical protein YggS, proline synthase co-transcribed bacterial homolog PROSC	fig|227866.17.peg.984
Amino Acids and Derivatives	Proline and 4-hydroxyproline	A Hypothetical Protein Related to Proline Metabolism	Pyrroline-5-carboxylate reductase (EC 1.5.1.2)	fig|227866.17.peg.285, fig|227866.17.peg.660
Amino Acids and Derivatives	Proline and 4-hydroxyproline	Proline, 4-hydroxyproline uptake and utilization	Amino acid permease in 4-hydroxyproline catabolic gene cluster	fig|227866.17.peg.2568
Amino Acids and Derivatives	Proline and 4-hydroxyproline	Proline, 4-hydroxyproline uptake and utilization	Proline/sodium symporter PutP (TC 2.A.21.2.1)	fig|227866.17.peg.3926
Amino Acids and Derivatives	Proline and 4-hydroxyproline	Proline, 4-hydroxyproline uptake and utilization	Proline dehydrogenase (EC 1.5.99.8) (Proline oxidase)	fig|227866.17.peg.2751, fig|227866.17.peg.3259
Amino Acids and Derivatives	Proline and 4-hydroxyproline	Proline, 4-hydroxyproline uptake and utilization	L-Proline/Glycine betaine transporter ProP	fig|227866.17.peg.2361, fig|227866.17.peg.2506, fig|227866.17.peg.2997, fig|227866.17.peg.3999, fig|227866.17.peg.4052
Amino Acids and Derivatives	Proline and 4-hydroxyproline	Proline, 4-hydroxyproline uptake and utilization	Delta-1-pyrroline-5-carboxylate dehydrogenase (EC 1.2.1.88)	fig|227866.17.peg.3258
Amino Acids and Derivatives	Proline and 4-hydroxyproline	Proline, 4-hydroxyproline uptake and utilization	Ketoglutarate semialdehyde dehydrogenase (EC 1.2.1.26)	fig|227866.17.peg.3336
Amino Acids and Derivatives	Alanine, serine, and glycine	Glycine Biosynthesis	2-amino-3-ketobutyrate coenzyme A ligase (EC 2.3.1.29)	fig|227866.17.peg.823
Amino Acids and Derivatives	Alanine, serine, and glycine	Glycine Biosynthesis	Serine hydroxymethyltransferase (EC 2.1.2.1)	fig|227866.17.peg.2309
Amino Acids and Derivatives	Alanine, serine, and glycine	Glycine Biosynthesis	L-threonine 3-dehydrogenase (EC 1.1.1.103)	fig|227866.17.peg.824
Amino Acids and Derivatives	Alanine, serine, and glycine	Alanine biosynthesis	Branched-chain amino acid aminotransferase (EC 2.6.1.42)	fig|227866.17.peg.2127, fig|227866.17.peg.3345
Amino Acids and Derivatives	Alanine, serine, and glycine	Alanine biosynthesis	Cysteine desulfurase (EC 2.8.1.7)	fig|227866.17.peg.3314, fig|227866.17.peg.3476, fig|227866.17.peg.3517, fig|227866.17.peg.3693
Amino Acids and Derivatives	Alanine, serine, and glycine	Alanine biosynthesis	Cysteine desulfurase (EC 2.8.1.7), SufS subfamily	fig|227866.17.peg.2771
Amino Acids and Derivatives	Alanine, serine, and glycine	Alanine biosynthesis	Alanine racemase (EC 5.1.1.1)	fig|227866.17.peg.755, fig|227866.17.peg.3102
Amino Acids and Derivatives	Alanine, serine, and glycine	Alanine biosynthesis	Iron-sulfur cluster regulator IscR	fig|227866.17.peg.3477
Amino Acids and Derivatives	Alanine, serine, and glycine	Serine Biosynthesis	D-3-phosphoglycerate dehydrogenase (EC 1.1.1.95)	fig|227866.17.peg.361
Amino Acids and Derivatives	Alanine, serine, and glycine	Serine Biosynthesis	Serine hydroxymethyltransferase (EC 2.1.2.1)	fig|227866.17.peg.2309
Amino Acids and Derivatives	Alanine, serine, and glycine	Serine Biosynthesis	Phosphoserine aminotransferase (EC 2.6.1.52)	fig|227866.17.peg.1691
Amino Acids and Derivatives	Alanine, serine, and glycine	Glycine cleavage system	Glycine cleavage system H protein	fig|227866.17.peg.2757
Amino Acids and Derivatives	Alanine, serine, and glycine	Glycine cleavage system	Glycine dehydrogenase [decarboxylating] (glycine cleavage system P2 protein) (EC 1.4.4.2)	fig|227866.17.peg.204
Amino Acids and Derivatives	Alanine, serine, and glycine	Glycine cleavage system	Glycine dehydrogenase [decarboxylating] (glycine cleavage system P1 protein) (EC 1.4.4.2)	fig|227866.17.peg.203
Amino Acids and Derivatives	Alanine, serine, and glycine	Glycine cleavage system	Aminomethyltransferase (glycine cleavage system T protein) (EC 2.1.2.10)	fig|227866.17.peg.202
Amino Acids and Derivatives	Alanine, serine, and glycine	Glycine and Serine Utilization	D-serine/D-alanine/glycine transporter	fig|227866.17.peg.2616, fig|227866.17.peg.3016, fig|227866.17.peg.4210
Amino Acids and Derivatives	Alanine, serine, and glycine	Glycine and Serine Utilization	L-serine dehydratase, alpha subunit (EC 4.3.1.17)	fig|227866.17.peg.937
Amino Acids and Derivatives	Alanine, serine, and glycine	Glycine and Serine Utilization	L-serine dehydratase, beta subunit (EC 4.3.1.17)	fig|227866.17.peg.938
Amino Acids and Derivatives	Alanine, serine, and glycine	Glycine and Serine Utilization	Glycine dehydrogenase [decarboxylating] (glycine cleavage system P1 protein) (EC 1.4.4.2)	fig|227866.17.peg.203
Amino Acids and Derivatives	Alanine, serine, and glycine	Glycine and Serine Utilization	Cystathionine gamma-lyase (EC 4.4.1.1)	fig|227866.17.peg.4228
Amino Acids and Derivatives	Alanine, serine, and glycine	Glycine and Serine Utilization	Serine hydroxymethyltransferase (EC 2.1.2.1)	fig|227866.17.peg.2309
Amino Acids and Derivatives	Alanine, serine, and glycine	Glycine and Serine Utilization	D-serine dehydratase (EC 4.3.1.18)	fig|227866.17.peg.288
Amino Acids and Derivatives	Alanine, serine, and glycine	Glycine and Serine Utilization	Aminomethyltransferase (glycine cleavage system T protein) (EC 2.1.2.10)	fig|227866.17.peg.202
Amino Acids and Derivatives	Alanine, serine, and glycine	Glycine and Serine Utilization	Cystathionine beta-synthase (EC 4.2.1.22)	fig|227866.17.peg.4229
Amino Acids and Derivatives	Alanine, serine, and glycine	Glycine and Serine Utilization	D-3-phosphoglycerate dehydrogenase (EC 1.1.1.95)	fig|227866.17.peg.361
Amino Acids and Derivatives	Alanine, serine, and glycine	Glycine and Serine Utilization	Glycine dehydrogenase [decarboxylating] (glycine cleavage system P2 protein) (EC 1.4.4.2)	fig|227866.17.peg.204
Amino Acids and Derivatives	Alanine, serine, and glycine	Glycine and Serine Utilization	Phosphoserine aminotransferase (EC 2.6.1.52)	fig|227866.17.peg.1691
Amino Acids and Derivatives	Alanine, serine, and glycine	Glycine and Serine Utilization	Seryl-tRNA synthetase (EC 6.1.1.11)	fig|227866.17.peg.4396
Amino Acids and Derivatives	Alanine, serine, and glycine	Glycine and Serine Utilization	Glycine cleavage system H protein	fig|227866.17.peg.2757
Amino Acids and Derivatives	Alanine, serine, and glycine	Glycine and Serine Utilization	2-amino-3-ketobutyrate coenzyme A ligase (EC 2.3.1.29)	fig|227866.17.peg.823
Amino Acids and Derivatives	Alanine, serine, and glycine	Glycine and Serine Utilization	Glycerate kinase (EC 2.7.1.31)	fig|227866.17.peg.478, fig|227866.17.peg.1965
Sulfur Metabolism	Inorganic sulfur assimilation	Inorganic Sulfur Assimilation	Putative sulfate permease	fig|227866.17.peg.1316
Sulfur Metabolism	Inorganic sulfur assimilation	Inorganic Sulfur Assimilation	Adenylylsulfate kinase (EC 2.7.1.25)	fig|227866.17.peg.962, fig|227866.17.peg.1595
Sulfur Metabolism	Inorganic sulfur assimilation	Inorganic Sulfur Assimilation	Phosphoadenylyl-sulfate reductase [thioredoxin] (EC 1.8.4.8)	fig|227866.17.peg.965, fig|227866.17.peg.1593
Sulfur Metabolism	Inorganic sulfur assimilation	Inorganic Sulfur Assimilation	Sulfate adenylyltransferase, dissimilatory-type (EC 2.7.7.4)	fig|227866.17.peg.963, fig|227866.17.peg.1594
Sulfur Metabolism	Inorganic sulfur assimilation	Inorganic Sulfur Assimilation	Adenylyl-sulfate reductase [thioredoxin] (EC 1.8.4.10)	fig|227866.17.peg.965, fig|227866.17.peg.1593
Sulfur Metabolism	Inorganic sulfur assimilation	Inorganic Sulfur Assimilation	Sulfite reductase [NADPH] hemoprotein beta-component (EC 1.8.1.2)	fig|227866.17.peg.2684
Sulfur Metabolism	Inorganic sulfur assimilation	Inorganic Sulfur Assimilation	Sulfite reductase [NADPH] flavoprotein alpha-component (EC 1.8.1.2)	fig|227866.17.peg.2683
Sulfur Metabolism	Inorganic sulfur assimilation	Inorganic Sulfur Assimilation	Ferredoxin	fig|227866.17.peg.51, fig|227866.17.peg.364, fig|227866.17.peg.1628
Sulfur Metabolism	Inorganic sulfur assimilation	Inorganic Sulfur Assimilation	Sulfate permease, Pit-type	fig|227866.17.peg.964
Sulfur Metabolism	Sulfur Metabolism - no subcategory	Thioredoxin-disulfide reductase	Thiol peroxidase, Tpx-type (EC 1.11.1.15)	fig|227866.17.peg.3682
Sulfur Metabolism	Sulfur Metabolism - no subcategory	Thioredoxin-disulfide reductase	Alkyl hydroperoxide reductase protein F (EC 1.6.4.-)	fig|227866.17.peg.1959
Sulfur Metabolism	Sulfur Metabolism - no subcategory	Thioredoxin-disulfide reductase	Thiol peroxidase, Bcp-type (EC 1.11.1.15)	fig|227866.17.peg.4131
Sulfur Metabolism	Sulfur Metabolism - no subcategory	Thioredoxin-disulfide reductase	Alkyl hydroperoxide reductase subunit C-like protein	fig|227866.17.peg.1111
Sulfur Metabolism	Sulfur Metabolism - no subcategory	Thioredoxin-disulfide reductase	Alkyl hydroperoxide reductase protein C (EC 1.6.4.-)	fig|227866.17.peg.1960
Sulfur Metabolism	Sulfur Metabolism - no subcategory	Thioredoxin-disulfide reductase	Thioredoxin reductase (EC 1.8.1.9)	fig|227866.17.peg.373, fig|227866.17.peg.2537, fig|227866.17.peg.2833, fig|227866.17.peg.3252
Sulfur Metabolism	Sulfur Metabolism - no subcategory	Galactosylceramide and Sulfatide metabolism	Alpha-galactosidase (EC 3.2.1.22)	fig|227866.17.peg.3766, fig|227866.17.peg.3970
Sulfur Metabolism	Sulfur Metabolism - no subcategory	Galactosylceramide and Sulfatide metabolism	Beta-galactosidase (EC 3.2.1.23)	fig|227866.17.peg.2604, fig|227866.17.peg.3965
Sulfur Metabolism	Organic sulfur assimilation	L-Cystine Uptake and Metabolism	L-Cystine ABC transporter, permease protein TcyB	fig|227866.17.peg.3216
Sulfur Metabolism	Organic sulfur assimilation	L-Cystine Uptake and Metabolism	Cystathionine beta-lyase (EC 4.4.1.8)	fig|227866.17.peg.1488
Sulfur Metabolism	Organic sulfur assimilation	L-Cystine Uptake and Metabolism	L-cystine uptake protein TcyP	fig|227866.17.peg.1783
Sulfur Metabolism	Organic sulfur assimilation	L-Cystine Uptake and Metabolism	L-Cystine ABC transporter, periplasmic cystine-binding protein TcyA	fig|227866.17.peg.3215
Sulfur Metabolism	Organic sulfur assimilation	L-Cystine Uptake and Metabolism	Cystathionine gamma-synthase (EC 2.5.1.48)	fig|227866.17.peg.1489, fig|227866.17.peg.1490
Sulfur Metabolism	Organic sulfur assimilation	L-Cystine Uptake and Metabolism	L-Cystine ABC transporter, ATP-binding protein TcyC	fig|227866.17.peg.3217
Sulfur Metabolism	Organic sulfur assimilation	Alkanesulfonate assimilation	Alkanesulfonates-binding protein	fig|227866.17.peg.1814
Sulfur Metabolism	Organic sulfur assimilation	Alkanesulfonate assimilation	Alkanesulfonates transport system permease protein	fig|227866.17.peg.1813
Sulfur Metabolism	Organic sulfur assimilation	Alkanesulfonate assimilation	Alkanesulfonates ABC transporter ATP-binding protein	fig|227866.17.peg.1815, fig|227866.17.peg.1816
Sulfur Metabolism	Organic sulfur assimilation	Alkanesulfonate assimilation	Alkanesulfonate monooxygenase (EC 1.14.14.5)	fig|227866.17.peg.1812
Sulfur Metabolism	Organic sulfur assimilation	Alkanesulfonates Utilization	Alkanesulfonates-binding protein	fig|227866.17.peg.1814
Sulfur Metabolism	Organic sulfur assimilation	Alkanesulfonates Utilization	Alkanesulfonates transport system permease protein	fig|227866.17.peg.1813
Sulfur Metabolism	Organic sulfur assimilation	Alkanesulfonates Utilization	Alkanesulfonates ABC transporter ATP-binding protein	fig|227866.17.peg.1815, fig|227866.17.peg.1816
Sulfur Metabolism	Organic sulfur assimilation	Alkanesulfonates Utilization	Alkanesulfonate monooxygenase (EC 1.14.14.5)	fig|227866.17.peg.1812
Phosphorus Metabolism	Phosphorus Metabolism - no subcategory	High affinity phosphate transporter and control of PHO regulon	Phosphate regulon transcriptional regulatory protein PhoB (SphR)	fig|227866.17.peg.2709
Phosphorus Metabolism	Phosphorus Metabolism - no subcategory	High affinity phosphate transporter and control of PHO regulon	Phosphate transport system permease protein PstC (TC 3.A.1.7.1)	fig|227866.17.peg.157
Phosphorus Metabolism	Phosphorus Metabolism - no subcategory	High affinity phosphate transporter and control of PHO regulon	Phosphate transport ATP-binding protein PstB (TC 3.A.1.7.1)	fig|227866.17.peg.159, fig|227866.17.peg.160
Phosphorus Metabolism	Phosphorus Metabolism - no subcategory	High affinity phosphate transporter and control of PHO regulon	Phosphate transport system permease protein PstA (TC 3.A.1.7.1)	fig|227866.17.peg.158
Phosphorus Metabolism	Phosphorus Metabolism - no subcategory	High affinity phosphate transporter and control of PHO regulon	Phosphate regulon sensor protein PhoR (SphS) (EC 2.7.13.3)	fig|227866.17.peg.3052, fig|227866.17.peg.3650
Phosphorus Metabolism	Phosphorus Metabolism - no subcategory	High affinity phosphate transporter and control of PHO regulon	Alkaline phosphatase synthesis transcriptional regulatory protein PhoP	fig|227866.17.peg.3051, fig|227866.17.peg.3651
Phosphorus Metabolism	Phosphorus Metabolism - no subcategory	High affinity phosphate transporter and control of PHO regulon	Phosphate ABC transporter, periplasmic phosphate-binding protein PstS (TC 3.A.1.7.1)	fig|227866.17.peg.156
Phosphorus Metabolism	Phosphorus Metabolism - no subcategory	Phosphate metabolism	Phosphate transport system permease protein PstC (TC 3.A.1.7.1)	fig|227866.17.peg.157
Phosphorus Metabolism	Phosphorus Metabolism - no subcategory	Phosphate metabolism	Phosphate transport system permease protein PstA (TC 3.A.1.7.1)	fig|227866.17.peg.158
Phosphorus Metabolism	Phosphorus Metabolism - no subcategory	Phosphate metabolism	Alkaline phosphatase synthesis transcriptional regulatory protein PhoP	fig|227866.17.peg.3051, fig|227866.17.peg.3651
Phosphorus Metabolism	Phosphorus Metabolism - no subcategory	Phosphate metabolism	Probable low-affinity inorganic phosphate transporter	fig|227866.17.peg.1265
Phosphorus Metabolism	Phosphorus Metabolism - no subcategory	Phosphate metabolism	Phosphate starvation-inducible protein PhoH, predicted ATPase	fig|227866.17.peg.120, fig|227866.17.peg.120
Phosphorus Metabolism	Phosphorus Metabolism - no subcategory	Phosphate metabolism	Sodium-dependent phosphate transporter	fig|227866.17.peg.112
Phosphorus Metabolism	Phosphorus Metabolism - no subcategory	Phosphate metabolism	Phosphate regulon sensor protein PhoR (SphS) (EC 2.7.13.3)	fig|227866.17.peg.3052, fig|227866.17.peg.3650
Phosphorus Metabolism	Phosphorus Metabolism - no subcategory	Phosphate metabolism	Phosphate regulon transcriptional regulatory protein PhoB (SphR)	fig|227866.17.peg.2709
Phosphorus Metabolism	Phosphorus Metabolism - no subcategory	Phosphate metabolism	Manganese-dependent inorganic pyrophosphatase (EC 3.6.1.1)	fig|227866.17.peg.1909
Phosphorus Metabolism	Phosphorus Metabolism - no subcategory	Phosphate metabolism	Phosphate transport ATP-binding protein PstB (TC 3.A.1.7.1)	fig|227866.17.peg.159, fig|227866.17.peg.160
Phosphorus Metabolism	Phosphorus Metabolism - no subcategory	Phosphate metabolism	Phosphate ABC transporter, periplasmic phosphate-binding protein PstS (TC 3.A.1.7.1)	fig|227866.17.peg.156
Phosphorus Metabolism	Phosphorus Metabolism - no subcategory	Phosphate metabolism	Predicted ATPase related to phosphate starvation-inducible protein PhoH	fig|227866.17.peg.1047
Phosphorus Metabolism	Phosphorus Metabolism - no subcategory	Phosphate metabolism	Alkaline phosphatase (EC 3.1.3.1)	fig|227866.17.peg.1752, fig|227866.17.peg.3003
Phosphorus Metabolism	Phosphorus Metabolism - no subcategory	Phosphate metabolism	Alkaline phosphatase like protein	fig|227866.17.peg.1641, fig|227866.17.peg.3356
Phosphorus Metabolism	Phosphorus Metabolism - no subcategory	Phosphate metabolism	Inorganic pyrophospatase PpaX (EC 3.1.3.18)	fig|227866.17.peg.2519
Phosphorus Metabolism	Phosphorus Metabolism - no subcategory	Phosphate metabolism	Phosphate transport regulator (distant homolog of PhoU)	fig|227866.17.peg.1264
Carbohydrates	Central carbohydrate metabolism	Methylglyoxal Metabolism	Methylglyoxal synthase (EC 4.2.3.3)	fig|227866.17.peg.424
Carbohydrates	Central carbohydrate metabolism	Methylglyoxal Metabolism	Lactoylglutathione lyase (EC 4.4.1.5)	fig|227866.17.peg.3609
Carbohydrates	Central carbohydrate metabolism	Methylglyoxal Metabolism	Aldehyde dehydrogenase (EC 1.2.1.3)	fig|227866.17.peg.566, fig|227866.17.peg.1978, fig|227866.17.peg.2095, fig|227866.17.peg.2196, fig|227866.17.peg.3994, fig|227866.17.peg.566, fig|227866.17.peg.1978, fig|227866.17.peg.2095, fig|227866.17.peg.2196, fig|227866.17.peg.3994
Carbohydrates	Central carbohydrate metabolism	Methylglyoxal Metabolism	Hydroxyacylglutathione hydrolase (EC 3.1.2.6)	fig|227866.17.peg.286
Carbohydrates	Central carbohydrate metabolism	Pyruvate metabolism II: acetyl-CoA, acetogenesis from pyruvate	Pyruvate oxidase [ubiquinone, cytochrome] (EC 1.2.2.2)	fig|227866.17.peg.3134
Carbohydrates	Central carbohydrate metabolism	Pyruvate metabolism II: acetyl-CoA, acetogenesis from pyruvate	Acetate permease ActP (cation/acetate symporter)	fig|227866.17.peg.537, fig|227866.17.peg.1644
Carbohydrates	Central carbohydrate metabolism	Pyruvate metabolism II: acetyl-CoA, acetogenesis from pyruvate	Acetyl-coenzyme A synthetase (EC 6.2.1.1)	fig|227866.17.peg.3704
Carbohydrates	Central carbohydrate metabolism	Pyruvate metabolism II: acetyl-CoA, acetogenesis from pyruvate	Dihydrolipoamide dehydrogenase of pyruvate dehydrogenase complex (EC 1.8.1.4)	fig|227866.17.peg.1070
Carbohydrates	Central carbohydrate metabolism	Pyruvate metabolism II: acetyl-CoA, acetogenesis from pyruvate	Pyruvate dehydrogenase E1 component alpha subunit (EC 1.2.4.1)	fig|227866.17.peg.1073
Carbohydrates	Central carbohydrate metabolism	Pyruvate metabolism II: acetyl-CoA, acetogenesis from pyruvate	NAD-dependent protein deacetylase of SIR2 family	fig|227866.17.peg.1729
Carbohydrates	Central carbohydrate metabolism	Pyruvate metabolism II: acetyl-CoA, acetogenesis from pyruvate	Acylphosphate phosphohydrolase (EC 3.6.1.7), putative	fig|227866.17.peg.4025
Carbohydrates	Central carbohydrate metabolism	Pyruvate metabolism II: acetyl-CoA, acetogenesis from pyruvate	NAD-independent protein deacetylase AcuC	fig|227866.17.peg.3707
Carbohydrates	Central carbohydrate metabolism	Pyruvate metabolism II: acetyl-CoA, acetogenesis from pyruvate	Aldehyde dehydrogenase (EC 1.2.1.3)	fig|227866.17.peg.566, fig|227866.17.peg.1978, fig|227866.17.peg.2095, fig|227866.17.peg.2196, fig|227866.17.peg.3994
Carbohydrates	Central carbohydrate metabolism	Pyruvate metabolism II: acetyl-CoA, acetogenesis from pyruvate	Pyruvate dehydrogenase E1 component beta subunit (EC 1.2.4.1)	fig|227866.17.peg.1072
Carbohydrates	Central carbohydrate metabolism	Pyruvate metabolism II: acetyl-CoA, acetogenesis from pyruvate	Dihydrolipoamide acetyltransferase component of pyruvate dehydrogenase complex (EC 2.3.1.12)	fig|227866.17.peg.1071
Carbohydrates	Central carbohydrate metabolism	Pyruvate metabolism II: acetyl-CoA, acetogenesis from pyruvate	Phosphate acetyltransferase (EC 2.3.1.8)	fig|227866.17.peg.2229
Carbohydrates	Central carbohydrate metabolism	Pyruvate metabolism II: acetyl-CoA, acetogenesis from pyruvate	Acetate kinase (EC 2.7.2.1)	fig|227866.17.peg.3679
Carbohydrates	Central carbohydrate metabolism	Pyruvate metabolism II: acetyl-CoA, acetogenesis from pyruvate	Acetyltransferase AcuA, acetyl-CoA synthetase inhibitor	fig|227866.17.peg.3705
Carbohydrates	Central carbohydrate metabolism	Pyruvate Alanine Serine Interconversions	D-serine/D-alanine/glycine transporter	fig|227866.17.peg.2616, fig|227866.17.peg.3016, fig|227866.17.peg.4210
Carbohydrates	Central carbohydrate metabolism	Pyruvate Alanine Serine Interconversions	L-serine dehydratase, alpha subunit (EC 4.3.1.17)	fig|227866.17.peg.937
Carbohydrates	Central carbohydrate metabolism	Pyruvate Alanine Serine Interconversions	Branched-chain amino acid aminotransferase (EC 2.6.1.42)	fig|227866.17.peg.2127, fig|227866.17.peg.3345
Carbohydrates	Central carbohydrate metabolism	Pyruvate Alanine Serine Interconversions	L-serine dehydratase, beta subunit (EC 4.3.1.17)	fig|227866.17.peg.938
Carbohydrates	Central carbohydrate metabolism	Pyruvate Alanine Serine Interconversions	Alanine racemase (EC 5.1.1.1)	fig|227866.17.peg.755, fig|227866.17.peg.3102
Carbohydrates	Central carbohydrate metabolism	Pyruvate Alanine Serine Interconversions	D-amino acid dehydrogenase small subunit (EC 1.4.99.1)	fig|227866.17.peg.2778
Carbohydrates	Central carbohydrate metabolism	Pyruvate Alanine Serine Interconversions	L-alanine:glyoxylate aminotransferase (EC 2.6.1.44)	fig|227866.17.peg.2789
Carbohydrates	Central carbohydrate metabolism	Pyruvate Alanine Serine Interconversions	Alanine dehydrogenase (EC 1.4.1.1)	fig|227866.17.peg.2851
Carbohydrates	Central carbohydrate metabolism	Pyruvate Alanine Serine Interconversions	D-serine dehydratase (EC 4.3.1.18)	fig|227866.17.peg.288
Carbohydrates	Central carbohydrate metabolism	Pyruvate Alanine Serine Interconversions	D-alanine aminotransferase (EC 2.6.1.21)	fig|227866.17.peg.1727
Carbohydrates	Central carbohydrate metabolism	Glyoxylate bypass	Malate dehydrogenase (EC 1.1.1.37)	fig|227866.17.peg.3653
Carbohydrates	Central carbohydrate metabolism	Glyoxylate bypass	Citrate synthase (si) (EC 2.3.3.1)	fig|227866.17.peg.45, fig|227866.17.peg.1749, fig|227866.17.peg.3655
Carbohydrates	Central carbohydrate metabolism	Glyoxylate bypass	Isocitrate lyase (EC 4.1.3.1)	fig|227866.17.peg.251
Carbohydrates	Central carbohydrate metabolism	Glyoxylate bypass	(R)-2-hydroxyacid dehydrogenase, similar to L-sulfolactate dehydrogenase (EC 1.1.1.272)	fig|227866.17.peg.1324, fig|227866.17.peg.1325
Carbohydrates	Central carbohydrate metabolism	Glyoxylate bypass	Aconitate hydratase (EC 4.2.1.3)	fig|227866.17.peg.710
Carbohydrates	Central carbohydrate metabolism	Glycolysis and Gluconeogenesis	Fructose-1,6-bisphosphatase, Bacillus type (EC 3.1.3.11)	fig|227866.17.peg.1948
Carbohydrates	Central carbohydrate metabolism	Glycolysis and Gluconeogenesis	6-phosphofructokinase (EC 2.7.1.11)	fig|227866.17.peg.3660
Carbohydrates	Central carbohydrate metabolism	Glycolysis and Gluconeogenesis	Triosephosphate isomerase (EC 5.3.1.1)	fig|227866.17.peg.2625
Carbohydrates	Central carbohydrate metabolism	Glycolysis and Gluconeogenesis	Fructose-1,6-bisphosphatase, GlpX type (EC 3.1.3.11)	fig|227866.17.peg.2288
Carbohydrates	Central carbohydrate metabolism	Glycolysis and Gluconeogenesis	Fructose-bisphosphate aldolase class II (EC 4.1.2.13)	fig|227866.17.peg.2285
Carbohydrates	Central carbohydrate metabolism	Glycolysis and Gluconeogenesis	2,3-bisphosphoglycerate-independent phosphoglycerate mutase (EC 5.4.2.1)	fig|227866.17.peg.2626
Carbohydrates	Central carbohydrate metabolism	Glycolysis and Gluconeogenesis	Glucose-6-phosphate isomerase (EC 5.3.1.9)	fig|227866.17.peg.2911
Carbohydrates	Central carbohydrate metabolism	Glycolysis and Gluconeogenesis	NADPH-dependent glyceraldehyde-3-phosphate dehydrogenase (EC 1.2.1.13)	fig|227866.17.peg.3642
Carbohydrates	Central carbohydrate metabolism	Glycolysis and Gluconeogenesis	Glucokinase (EC 2.7.1.2)	fig|227866.17.peg.171
Carbohydrates	Central carbohydrate metabolism	Glycolysis and Gluconeogenesis	Pyruvate kinase (EC 2.7.1.40)	fig|227866.17.peg.3659
Carbohydrates	Central carbohydrate metabolism	Glycolysis and Gluconeogenesis	Phosphoenolpyruvate synthase (EC 2.7.9.2)	fig|227866.17.peg.613, fig|227866.17.peg.2496
Carbohydrates	Central carbohydrate metabolism	Glycolysis and Gluconeogenesis	Phosphoglycerate kinase (EC 2.7.2.3)	fig|227866.17.peg.2624
Carbohydrates	Central carbohydrate metabolism	Glycolysis and Gluconeogenesis	NAD-dependent glyceraldehyde-3-phosphate dehydrogenase (EC 1.2.1.12)	fig|227866.17.peg.2623
Carbohydrates	Central carbohydrate metabolism	Glycolysis and Gluconeogenesis	Enolase (EC 4.2.1.11)	fig|227866.17.peg.2627
Carbohydrates	Central carbohydrate metabolism	Entner-Doudoroff Pathway	2-dehydro-3-deoxygluconate kinase (EC 2.7.1.45)	fig|227866.17.peg.462
Carbohydrates	Central carbohydrate metabolism	Entner-Doudoroff Pathway	2,3-bisphosphoglycerate-independent phosphoglycerate mutase (EC 5.4.2.1)	fig|227866.17.peg.2626
Carbohydrates	Central carbohydrate metabolism	Entner-Doudoroff Pathway	Glucose-6-phosphate 1-dehydrogenase (EC 1.1.1.49)	fig|227866.17.peg.279
Carbohydrates	Central carbohydrate metabolism	Entner-Doudoroff Pathway	2-dehydro-3-deoxyphosphogluconate aldolase (EC 4.1.2.14)	fig|227866.17.peg.463
Carbohydrates	Central carbohydrate metabolism	Entner-Doudoroff Pathway	Glucose 1-dehydrogenase (EC 1.1.1.47)	fig|227866.17.peg.1126, fig|227866.17.peg.3179, fig|227866.17.peg.3297
Carbohydrates	Central carbohydrate metabolism	Entner-Doudoroff Pathway	Gluconolactonase (EC 3.1.1.17)	fig|227866.17.peg.2711
Carbohydrates	Central carbohydrate metabolism	Entner-Doudoroff Pathway	6-phosphogluconolactonase (EC 3.1.1.31)	fig|227866.17.peg.1247
Carbohydrates	Central carbohydrate metabolism	Entner-Doudoroff Pathway	Gluconokinase (EC 2.7.1.12)	fig|227866.17.peg.1963
Carbohydrates	Central carbohydrate metabolism	Entner-Doudoroff Pathway	Glucokinase (EC 2.7.1.2)	fig|227866.17.peg.171
Carbohydrates	Central carbohydrate metabolism	Entner-Doudoroff Pathway	Pyruvate kinase (EC 2.7.1.40)	fig|227866.17.peg.3659
Carbohydrates	Central carbohydrate metabolism	Entner-Doudoroff Pathway	Phosphoglycerate kinase (EC 2.7.2.3)	fig|227866.17.peg.2624
Carbohydrates	Central carbohydrate metabolism	Entner-Doudoroff Pathway	NAD-dependent glyceraldehyde-3-phosphate dehydrogenase (EC 1.2.1.12)	fig|227866.17.peg.2623
Carbohydrates	Central carbohydrate metabolism	Entner-Doudoroff Pathway	Enolase (EC 4.2.1.11)	fig|227866.17.peg.2627
Carbohydrates	Central carbohydrate metabolism	Dehydrogenase complexes	Dihydrolipoamide dehydrogenase of acetoin dehydrogenase (EC 1.8.1.4)	fig|227866.17.peg.4072
Carbohydrates	Central carbohydrate metabolism	Dehydrogenase complexes	Branched-chain alpha-keto acid dehydrogenase, E1 component, alpha subunit (EC 1.2.4.4)	fig|227866.17.peg.258
Carbohydrates	Central carbohydrate metabolism	Dehydrogenase complexes	Acetoin dehydrogenase E1 component beta-subunit (EC 1.2.4.-)	fig|227866.17.peg.4070
Carbohydrates	Central carbohydrate metabolism	Dehydrogenase complexes	Pyruvate dehydrogenase E1 component alpha subunit (EC 1.2.4.1)	fig|227866.17.peg.1073
Carbohydrates	Central carbohydrate metabolism	Dehydrogenase complexes	Acetoin dehydrogenase E1 component alpha-subunit (EC 1.2.4.-)	fig|227866.17.peg.4069
Carbohydrates	Central carbohydrate metabolism	Dehydrogenase complexes	Dihydrolipoamide succinyltransferase component (E2) of 2-oxoglutarate dehydrogenase complex (EC 2.3.1.61)	fig|227866.17.peg.561
Carbohydrates	Central carbohydrate metabolism	Dehydrogenase complexes	Dihydrolipoamide acyltransferase component of branched-chain alpha-keto acid dehydrogenase complex (EC 2.3.1.168)	fig|227866.17.peg.260
Carbohydrates	Central carbohydrate metabolism	Dehydrogenase complexes	Branched-chain alpha-keto acid dehydrogenase, E1 component, beta subunit (EC 1.2.4.4)	fig|227866.17.peg.259
Carbohydrates	Central carbohydrate metabolism	Dehydrogenase complexes	Pyruvate dehydrogenase E1 component beta subunit (EC 1.2.4.1)	fig|227866.17.peg.1072
Carbohydrates	Central carbohydrate metabolism	Dehydrogenase complexes	Dihydrolipoamide acetyltransferase component (E2) of acetoin dehydrogenase complex (EC 2.3.1.-)	fig|227866.17.peg.4071
Carbohydrates	Central carbohydrate metabolism	Dehydrogenase complexes	Dihydrolipoamide dehydrogenase of branched-chain alpha-keto acid dehydrogenase (EC 1.8.1.4)	fig|227866.17.peg.257
Carbohydrates	Central carbohydrate metabolism	Dehydrogenase complexes	Dihydrolipoamide acetyltransferase component of pyruvate dehydrogenase complex (EC 2.3.1.12)	fig|227866.17.peg.1071
Carbohydrates	Central carbohydrate metabolism	Dehydrogenase complexes	2-oxoglutarate dehydrogenase E1 component (EC 1.2.4.2)	fig|227866.17.peg.560
Carbohydrates	Central carbohydrate metabolism	Dehydrogenase complexes	Cytosol aminopeptidase PepA (EC 3.4.11.1)	fig|227866.17.peg.2839
Carbohydrates	Central carbohydrate metabolism	TCA Cycle	Isocitrate dehydrogenase [NADP] (EC 1.1.1.42)	fig|227866.17.peg.3654
[truncated: 333 more rows]
