# Supplementary material for: Genome analysis of biosurfactant producing bacterium, Bacillus tequilensis
Source: PLoS One. 2023 Jun 2;18(6):e0285994. doi: 10.1371/journal.pone.0285994 (PMC10237388; doi:10.1371/journal.pone.0285994)
Supplement: S4 Table — (XLSX) [file pone.0285994.s004.xlsx]

## Sheet: Sheet1
Chromosome	Pos	Ref	Alt	Quality	Hom/Het	Read Depth	Alt Depth	Gene Name	Gene ID	Start	End	Strand	Represented Transcript (Annotation_type ; Gene_name ; codon_change ; protein_change ; cDNA_position/cDNA_len ; CDS_position/CDS_len ; Protein_position/Protein_len)	Transcript1 (Annotation_type ; Gene_name ; codon_change ; protein_change ; cDNA_position/cDNA_len ; CDS_position/CDS_len ; Protein_position/Protein_len)	Transcript2 (Annotation_type ; Gene_name ; codon_change ; protein_change ; cDNA_position/cDNA_len ; CDS_position/CDS_len ; Protein_position/Protein_len)	Transcript3 (Annotation_type ; Gene_name ; codon_change ; protein_change ; cDNA_position/cDNA_len ; CDS_position/CDS_len ; Protein_position/Protein_len)	Transcript4 (Annotation_type ; Gene_name ; codon_change ; protein_change ; cDNA_position/cDNA_len ; CDS_position/CDS_len ; Protein_position/Protein_len)	Transcript5 (Annotation_type ; Gene_name ; codon_change ; protein_change ; cDNA_position/cDNA_len ; CDS_position/CDS_len ; Protein_position/Protein_len)
NC_000964.3	799	T	C	225	hom	104	104	dnaA	gene-BSU_00010	410	1750	+	synonymous_variant ; dnaA ; c.390T>C ; p.His130His ; 390/1341 ; 390/1341 ; 130/446 ;	synonymous_variant ; dnaA ; c.390T>C ; p.His130His ; 390/1341 ; 390/1341 ; 130/446 ;	upstream_gene_variant ; dnaN ; c.-1140T>C ; . ; . ; . ; . ;	upstream_gene_variant ; rlbA ; c.-2407T>C ; . ; . ; . ; . ;	upstream_gene_variant ; recF ; c.-2638T>C ; . ; . ; . ; . ;	upstream_gene_variant ; remB ; c.-3768T>C ; . ; . ; . ; . ;
NC_000964.3	826	G	A	225	hom	107	107	dnaA	gene-BSU_00010	410	1750	+	synonymous_variant ; dnaA ; c.417G>A ; p.Ala139Ala ; 417/1341 ; 417/1341 ; 139/446 ;	synonymous_variant ; dnaA ; c.417G>A ; p.Ala139Ala ; 417/1341 ; 417/1341 ; 139/446 ;	upstream_gene_variant ; dnaN ; c.-1113G>A ; . ; . ; . ; . ;	upstream_gene_variant ; rlbA ; c.-2380G>A ; . ; . ; . ; . ;	upstream_gene_variant ; recF ; c.-2611G>A ; . ; . ; . ; . ;	upstream_gene_variant ; remB ; c.-3741G>A ; . ; . ; . ; . ;
NC_000964.3	832	G	A	225	hom	110	110	dnaA	gene-BSU_00010	410	1750	+	synonymous_variant ; dnaA ; c.423G>A ; p.Ala141Ala ; 423/1341 ; 423/1341 ; 141/446 ;	synonymous_variant ; dnaA ; c.423G>A ; p.Ala141Ala ; 423/1341 ; 423/1341 ; 141/446 ;	upstream_gene_variant ; dnaN ; c.-1107G>A ; . ; . ; . ; . ;	upstream_gene_variant ; rlbA ; c.-2374G>A ; . ; . ; . ; . ;	upstream_gene_variant ; recF ; c.-2605G>A ; . ; . ; . ; . ;	upstream_gene_variant ; remB ; c.-3735G>A ; . ; . ; . ; . ;
NC_000964.3	883	A	G	225	hom	107	107	dnaA	gene-BSU_00010	410	1750	+	synonymous_variant ; dnaA ; c.474A>G ; p.Thr158Thr ; 474/1341 ; 474/1341 ; 158/446 ;	synonymous_variant ; dnaA ; c.474A>G ; p.Thr158Thr ; 474/1341 ; 474/1341 ; 158/446 ;	upstream_gene_variant ; dnaN ; c.-1056A>G ; . ; . ; . ; . ;	upstream_gene_variant ; rlbA ; c.-2323A>G ; . ; . ; . ; . ;	upstream_gene_variant ; recF ; c.-2554A>G ; . ; . ; . ; . ;	upstream_gene_variant ; remB ; c.-3684A>G ; . ; . ; . ; . ;
NC_000964.3	1117	A	G	225	hom	81	81	dnaA	gene-BSU_00010	410	1750	+	synonymous_variant ; dnaA ; c.708A>G ; p.Leu236Leu ; 708/1341 ; 708/1341 ; 236/446 ;	synonymous_variant ; dnaA ; c.708A>G ; p.Leu236Leu ; 708/1341 ; 708/1341 ; 236/446 ;	upstream_gene_variant ; dnaN ; c.-822A>G ; . ; . ; . ; . ;	upstream_gene_variant ; rlbA ; c.-2089A>G ; . ; . ; . ; . ;	upstream_gene_variant ; recF ; c.-2320A>G ; . ; . ; . ; . ;	upstream_gene_variant ; remB ; c.-3450A>G ; . ; . ; . ; . ;
NC_000964.3	1156	G	A	225	hom	89	89	dnaA	gene-BSU_00010	410	1750	+	synonymous_variant ; dnaA ; c.747G>A ; p.Arg249Arg ; 747/1341 ; 747/1341 ; 249/446 ;	synonymous_variant ; dnaA ; c.747G>A ; p.Arg249Arg ; 747/1341 ; 747/1341 ; 249/446 ;	upstream_gene_variant ; dnaN ; c.-783G>A ; . ; . ; . ; . ;	upstream_gene_variant ; rlbA ; c.-2050G>A ; . ; . ; . ; . ;	upstream_gene_variant ; recF ; c.-2281G>A ; . ; . ; . ; . ;	upstream_gene_variant ; remB ; c.-3411G>A ; . ; . ; . ; . ;
NC_000964.3	1183	A	G	225	hom	91	91	dnaA	gene-BSU_00010	410	1750	+	synonymous_variant ; dnaA ; c.774A>G ; p.Glu258Glu ; 774/1341 ; 774/1341 ; 258/446 ;	synonymous_variant ; dnaA ; c.774A>G ; p.Glu258Glu ; 774/1341 ; 774/1341 ; 258/446 ;	upstream_gene_variant ; dnaN ; c.-756A>G ; . ; . ; . ; . ;	upstream_gene_variant ; rlbA ; c.-2023A>G ; . ; . ; . ; . ;	upstream_gene_variant ; recF ; c.-2254A>G ; . ; . ; . ; . ;	upstream_gene_variant ; remB ; c.-3384A>G ; . ; . ; . ; . ;
NC_000964.3	1273	G	A	225	hom	108	108	dnaA	gene-BSU_00010	410	1750	+	synonymous_variant ; dnaA ; c.864G>A ; p.Lys288Lys ; 864/1341 ; 864/1341 ; 288/446 ;	synonymous_variant ; dnaA ; c.864G>A ; p.Lys288Lys ; 864/1341 ; 864/1341 ; 288/446 ;	upstream_gene_variant ; dnaN ; c.-666G>A ; . ; . ; . ; . ;	upstream_gene_variant ; rlbA ; c.-1933G>A ; . ; . ; . ; . ;	upstream_gene_variant ; recF ; c.-2164G>A ; . ; . ; . ; . ;	upstream_gene_variant ; remB ; c.-3294G>A ; . ; . ; . ; . ;
NC_000964.3	1285	G	A	225	hom	108	108	dnaA	gene-BSU_00010	410	1750	+	synonymous_variant ; dnaA ; c.876G>A ; p.Glu292Glu ; 876/1341 ; 876/1341 ; 292/446 ;	synonymous_variant ; dnaA ; c.876G>A ; p.Glu292Glu ; 876/1341 ; 876/1341 ; 292/446 ;	upstream_gene_variant ; dnaN ; c.-654G>A ; . ; . ; . ; . ;	upstream_gene_variant ; rlbA ; c.-1921G>A ; . ; . ; . ; . ;	upstream_gene_variant ; recF ; c.-2152G>A ; . ; . ; . ; . ;	upstream_gene_variant ; remB ; c.-3282G>A ; . ; . ; . ; . ;
NC_000964.3	1480	A	G	225	hom	102	102	dnaA	gene-BSU_00010	410	1750	+	synonymous_variant ; dnaA ; c.1071A>G ; p.Lys357Lys ; 1071/1341 ; 1071/1341 ; 357/446 ;	synonymous_variant ; dnaA ; c.1071A>G ; p.Lys357Lys ; 1071/1341 ; 1071/1341 ; 357/446 ;	upstream_gene_variant ; dnaN ; c.-459A>G ; . ; . ; . ; . ;	upstream_gene_variant ; rlbA ; c.-1726A>G ; . ; . ; . ; . ;	upstream_gene_variant ; recF ; c.-1957A>G ; . ; . ; . ; . ;	upstream_gene_variant ; remB ; c.-3087A>G ; . ; . ; . ; . ;
NC_000964.3	1761	GATCA	GA	225	hom	83	83	.	.	.	.	.	.	upstream_gene_variant ; dnaN ; c.-176_-174delTCA ; . ; . ; . ; . ;	upstream_gene_variant ; rlbA ; c.-1443_-1441delTCA ; . ; . ; . ; . ;	upstream_gene_variant ; recF ; c.-1674_-1672delTCA ; . ; . ; . ; . ;	upstream_gene_variant ; remB ; c.-2804_-2802delTCA ; . ; . ; . ; . ;	upstream_gene_variant ; gyrB ; c.-3104_-3102delTCA ; . ; . ; . ; . ;
NC_000964.3	1900	AATATATATAT	AATATATATATATAT	225	hom	63	63	.	.	.	.	.	.	upstream_gene_variant ; dnaN ; c.-29_-28insATAT ; . ; . ; . ; . ;	upstream_gene_variant ; rlbA ; c.-1296_-1295insATAT ; . ; . ; . ; . ;	upstream_gene_variant ; recF ; c.-1527_-1526insATAT ; . ; . ; . ; . ;	upstream_gene_variant ; remB ; c.-2657_-2656insATAT ; . ; . ; . ; . ;	upstream_gene_variant ; gyrB ; c.-2957_-2956insATAT ; . ; . ; . ; . ;
NC_000964.3	2226	T	C	225	hom	133	133	dnaN	gene-BSU_00020	1939	3075	+	synonymous_variant ; dnaN ; c.288T>C ; p.Ile96Ile ; 288/1137 ; 288/1137 ; 96/378 ;	synonymous_variant ; dnaN ; c.288T>C ; p.Ile96Ile ; 288/1137 ; 288/1137 ; 96/378 ;	upstream_gene_variant ; rlbA ; c.-980T>C ; . ; . ; . ; . ;	upstream_gene_variant ; recF ; c.-1211T>C ; . ; . ; . ; . ;	upstream_gene_variant ; remB ; c.-2341T>C ; . ; . ; . ; . ;	upstream_gene_variant ; gyrB ; c.-2641T>C ; . ; . ; . ; . ;
NC_000964.3	2304	A	G	225	hom	202	202	dnaN	gene-BSU_00020	1939	3075	+	synonymous_variant ; dnaN ; c.366A>G ; p.Glu122Glu ; 366/1137 ; 366/1137 ; 122/378 ;	synonymous_variant ; dnaN ; c.366A>G ; p.Glu122Glu ; 366/1137 ; 366/1137 ; 122/378 ;	upstream_gene_variant ; rlbA ; c.-902A>G ; . ; . ; . ; . ;	upstream_gene_variant ; recF ; c.-1133A>G ; . ; . ; . ; . ;	upstream_gene_variant ; remB ; c.-2263A>G ; . ; . ; . ; . ;	upstream_gene_variant ; gyrB ; c.-2563A>G ; . ; . ; . ; . ;
NC_000964.3	2571	C	T	225	hom	194	194	dnaN	gene-BSU_00020	1939	3075	+	synonymous_variant ; dnaN ; c.633C>T ; p.Leu211Leu ; 633/1137 ; 633/1137 ; 211/378 ;	synonymous_variant ; dnaN ; c.633C>T ; p.Leu211Leu ; 633/1137 ; 633/1137 ; 211/378 ;	upstream_gene_variant ; rlbA ; c.-635C>T ; . ; . ; . ; . ;	upstream_gene_variant ; recF ; c.-866C>T ; . ; . ; . ; . ;	upstream_gene_variant ; remB ; c.-1996C>T ; . ; . ; . ; . ;	upstream_gene_variant ; gyrB ; c.-2296C>T ; . ; . ; . ; . ;
NC_000964.3	2817	C	T	225	hom	145	145	dnaN	gene-BSU_00020	1939	3075	+	synonymous_variant ; dnaN ; c.879C>T ; p.Ser293Ser ; 879/1137 ; 879/1137 ; 293/378 ;	synonymous_variant ; dnaN ; c.879C>T ; p.Ser293Ser ; 879/1137 ; 879/1137 ; 293/378 ;	upstream_gene_variant ; rlbA ; c.-389C>T ; . ; . ; . ; . ;	upstream_gene_variant ; recF ; c.-620C>T ; . ; . ; . ; . ;	upstream_gene_variant ; remB ; c.-1750C>T ; . ; . ; . ; . ;	upstream_gene_variant ; gyrB ; c.-2050C>T ; . ; . ; . ; . ;
NC_000964.3	2853	T	C	225	hom	145	145	dnaN	gene-BSU_00020	1939	3075	+	synonymous_variant ; dnaN ; c.915T>C ; p.Asn305Asn ; 915/1137 ; 915/1137 ; 305/378 ;	synonymous_variant ; dnaN ; c.915T>C ; p.Asn305Asn ; 915/1137 ; 915/1137 ; 305/378 ;	upstream_gene_variant ; rlbA ; c.-353T>C ; . ; . ; . ; . ;	upstream_gene_variant ; recF ; c.-584T>C ; . ; . ; . ; . ;	upstream_gene_variant ; remB ; c.-1714T>C ; . ; . ; . ; . ;	upstream_gene_variant ; gyrB ; c.-2014T>C ; . ; . ; . ; . ;
NC_000964.3	2856	G	A	225	hom	144	144	dnaN	gene-BSU_00020	1939	3075	+	synonymous_variant ; dnaN ; c.918G>A ; p.Ser306Ser ; 918/1137 ; 918/1137 ; 306/378 ;	synonymous_variant ; dnaN ; c.918G>A ; p.Ser306Ser ; 918/1137 ; 918/1137 ; 306/378 ;	upstream_gene_variant ; rlbA ; c.-350G>A ; . ; . ; . ; . ;	upstream_gene_variant ; recF ; c.-581G>A ; . ; . ; . ; . ;	upstream_gene_variant ; remB ; c.-1711G>A ; . ; . ; . ; . ;	upstream_gene_variant ; gyrB ; c.-2011G>A ; . ; . ; . ; . ;
NC_000964.3	2859	A	G	225	hom	146	146	dnaN	gene-BSU_00020	1939	3075	+	synonymous_variant ; dnaN ; c.921A>G ; p.Pro307Pro ; 921/1137 ; 921/1137 ; 307/378 ;	synonymous_variant ; dnaN ; c.921A>G ; p.Pro307Pro ; 921/1137 ; 921/1137 ; 307/378 ;	upstream_gene_variant ; rlbA ; c.-347A>G ; . ; . ; . ; . ;	upstream_gene_variant ; recF ; c.-578A>G ; . ; . ; . ; . ;	upstream_gene_variant ; remB ; c.-1708A>G ; . ; . ; . ; . ;	upstream_gene_variant ; gyrB ; c.-2008A>G ; . ; . ; . ; . ;
NC_000964.3	2888	T	C	225	hom	147	147	dnaN	gene-BSU_00020	1939	3075	+	missense_variant ; dnaN ; c.950T>C ; p.Val317Ala ; 950/1137 ; 950/1137 ; 317/378 ;	missense_variant ; dnaN ; c.950T>C ; p.Val317Ala ; 950/1137 ; 950/1137 ; 317/378 ;	upstream_gene_variant ; rlbA ; c.-318T>C ; . ; . ; . ; . ;	upstream_gene_variant ; recF ; c.-549T>C ; . ; . ; . ; . ;	upstream_gene_variant ; remB ; c.-1679T>C ; . ; . ; . ; . ;	upstream_gene_variant ; gyrB ; c.-1979T>C ; . ; . ; . ; . ;
NC_000964.3	3096	C	T	225	hom	137	137	.	.	.	.	.	.	upstream_gene_variant ; rlbA ; c.-110C>T ; . ; . ; . ; . ;	upstream_gene_variant ; recF ; c.-341C>T ; . ; . ; . ; . ;	upstream_gene_variant ; remB ; c.-1471C>T ; . ; . ; . ; . ;	upstream_gene_variant ; gyrB ; c.-1771C>T ; . ; . ; . ; . ;	upstream_gene_variant ; gyrA ; c.-3898C>T ; . ; . ; . ; . ;
NC_000964.3	4102	C	G	225	hom	230	230	recF	gene-BSU_00040	3437	4549	+	synonymous_variant ; recF ; c.666C>G ; p.Thr222Thr ; 666/1113 ; 666/1113 ; 222/370 ;	synonymous_variant ; recF ; c.666C>G ; p.Thr222Thr ; 666/1113 ; 666/1113 ; 222/370 ;	upstream_gene_variant ; remB ; c.-465C>G ; . ; . ; . ; . ;	upstream_gene_variant ; gyrB ; c.-765C>G ; . ; . ; . ; . ;	upstream_gene_variant ; gyrA ; c.-2892C>G ; . ; . ; . ; . ;	downstream_gene_variant ; dnaA ; c.*2352C>G ; . ; . ; . ; . ;
NC_000964.3	4971	C	T	225	hom	320	320	gyrB	gene-BSU_00060	4867	6783	+	synonymous_variant ; gyrB ; c.105C>T ; p.Ser35Ser ; 105/1917 ; 105/1917 ; 35/638 ;	synonymous_variant ; gyrB ; c.105C>T ; p.Ser35Ser ; 105/1917 ; 105/1917 ; 35/638 ;	upstream_gene_variant ; gyrA ; c.-2023C>T ; . ; . ; . ; . ;	upstream_gene_variant ; rrnO-16S ; n.-4839C>T ; . ; . ; . ; . ;	downstream_gene_variant ; dnaA ; c.*3221C>T ; . ; . ; . ; . ;	downstream_gene_variant ; dnaN ; c.*1896C>T ; . ; . ; . ; . ;
NC_000964.3	4987	T	C	225	hom	333	333	gyrB	gene-BSU_00060	4867	6783	+	synonymous_variant ; gyrB ; c.121T>C ; p.Leu41Leu ; 121/1917 ; 121/1917 ; 41/638 ;	synonymous_variant ; gyrB ; c.121T>C ; p.Leu41Leu ; 121/1917 ; 121/1917 ; 41/638 ;	upstream_gene_variant ; gyrA ; c.-2007T>C ; . ; . ; . ; . ;	upstream_gene_variant ; rrnO-16S ; n.-4823T>C ; . ; . ; . ; . ;	downstream_gene_variant ; dnaA ; c.*3237T>C ; . ; . ; . ; . ;	downstream_gene_variant ; dnaN ; c.*1912T>C ; . ; . ; . ; . ;
NC_000964.3	5040	T	C	225	hom	342	342	gyrB	gene-BSU_00060	4867	6783	+	synonymous_variant ; gyrB ; c.174T>C ; p.Cys58Cys ; 174/1917 ; 174/1917 ; 58/638 ;	synonymous_variant ; gyrB ; c.174T>C ; p.Cys58Cys ; 174/1917 ; 174/1917 ; 58/638 ;	upstream_gene_variant ; gyrA ; c.-1954T>C ; . ; . ; . ; . ;	upstream_gene_variant ; rrnO-16S ; n.-4770T>C ; . ; . ; . ; . ;	downstream_gene_variant ; dnaA ; c.*3290T>C ; . ; . ; . ; . ;	downstream_gene_variant ; dnaN ; c.*1965T>C ; . ; . ; . ; . ;
NC_000964.3	5886	A	G	225	hom	181	181	gyrB	gene-BSU_00060	4867	6783	+	synonymous_variant ; gyrB ; c.1020A>G ; p.Thr340Thr ; 1020/1917 ; 1020/1917 ; 340/638 ;	synonymous_variant ; gyrB ; c.1020A>G ; p.Thr340Thr ; 1020/1917 ; 1020/1917 ; 340/638 ;	upstream_gene_variant ; gyrA ; c.-1108A>G ; . ; . ; . ; . ;	upstream_gene_variant ; rrnO-16S ; n.-3924A>G ; . ; . ; . ; . ;	downstream_gene_variant ; dnaA ; c.*4136A>G ; . ; . ; . ; . ;	downstream_gene_variant ; dnaN ; c.*2811A>G ; . ; . ; . ; . ;
NC_000964.3	6003	T	C	225	hom	190	190	gyrB	gene-BSU_00060	4867	6783	+	synonymous_variant ; gyrB ; c.1137T>C ; p.Gly379Gly ; 1137/1917 ; 1137/1917 ; 379/638 ;	synonymous_variant ; gyrB ; c.1137T>C ; p.Gly379Gly ; 1137/1917 ; 1137/1917 ; 379/638 ;	upstream_gene_variant ; gyrA ; c.-991T>C ; . ; . ; . ; . ;	upstream_gene_variant ; rrnO-16S ; n.-3807T>C ; . ; . ; . ; . ;	downstream_gene_variant ; dnaA ; c.*4253T>C ; . ; . ; . ; . ;	downstream_gene_variant ; dnaN ; c.*2928T>C ; . ; . ; . ; . ;
NC_000964.3	6042	G	C	225	hom	178	178	gyrB	gene-BSU_00060	4867	6783	+	synonymous_variant ; gyrB ; c.1176G>C ; p.Ala392Ala ; 1176/1917 ; 1176/1917 ; 392/638 ;	synonymous_variant ; gyrB ; c.1176G>C ; p.Ala392Ala ; 1176/1917 ; 1176/1917 ; 392/638 ;	upstream_gene_variant ; gyrA ; c.-952G>C ; . ; . ; . ; . ;	upstream_gene_variant ; rrnO-16S ; n.-3768G>C ; . ; . ; . ; . ;	downstream_gene_variant ; dnaA ; c.*4292G>C ; . ; . ; . ; . ;	downstream_gene_variant ; dnaN ; c.*2967G>C ; . ; . ; . ; . ;
NC_000964.3	6057	C	T	225	hom	171	171	gyrB	gene-BSU_00060	4867	6783	+	synonymous_variant ; gyrB ; c.1191C>T ; p.Arg397Arg ; 1191/1917 ; 1191/1917 ; 397/638 ;	synonymous_variant ; gyrB ; c.1191C>T ; p.Arg397Arg ; 1191/1917 ; 1191/1917 ; 397/638 ;	upstream_gene_variant ; gyrA ; c.-937C>T ; . ; . ; . ; . ;	upstream_gene_variant ; rrnO-16S ; n.-3753C>T ; . ; . ; . ; . ;	downstream_gene_variant ; dnaA ; c.*4307C>T ; . ; . ; . ; . ;	downstream_gene_variant ; dnaN ; c.*2982C>T ; . ; . ; . ; . ;
NC_000964.3	6081	A	C	228	hom	162	161	gyrB	gene-BSU_00060	4867	6783	+	synonymous_variant ; gyrB ; c.1215A>C ; p.Ser405Ser ; 1215/1917 ; 1215/1917 ; 405/638 ;	synonymous_variant ; gyrB ; c.1215A>C ; p.Ser405Ser ; 1215/1917 ; 1215/1917 ; 405/638 ;	upstream_gene_variant ; gyrA ; c.-913A>C ; . ; . ; . ; . ;	upstream_gene_variant ; rrnO-16S ; n.-3729A>C ; . ; . ; . ; . ;	downstream_gene_variant ; dnaA ; c.*4331A>C ; . ; . ; . ; . ;	downstream_gene_variant ; dnaN ; c.*3006A>C ; . ; . ; . ; . ;
NC_000964.3	6085	C	T	225	hom	162	162	gyrB	gene-BSU_00060	4867	6783	+	synonymous_variant ; gyrB ; c.1219C>T ; p.Leu407Leu ; 1219/1917 ; 1219/1917 ; 407/638 ;	synonymous_variant ; gyrB ; c.1219C>T ; p.Leu407Leu ; 1219/1917 ; 1219/1917 ; 407/638 ;	upstream_gene_variant ; gyrA ; c.-909C>T ; . ; . ; . ; . ;	upstream_gene_variant ; rrnO-16S ; n.-3725C>T ; . ; . ; . ; . ;	downstream_gene_variant ; dnaA ; c.*4335C>T ; . ; . ; . ; . ;	downstream_gene_variant ; dnaN ; c.*3010C>T ; . ; . ; . ; . ;
NC_000964.3	6312	C	T	228	hom	235	234	gyrB	gene-BSU_00060	4867	6783	+	synonymous_variant ; gyrB ; c.1446C>T ; p.Ile482Ile ; 1446/1917 ; 1446/1917 ; 482/638 ;	synonymous_variant ; gyrB ; c.1446C>T ; p.Ile482Ile ; 1446/1917 ; 1446/1917 ; 482/638 ;	upstream_gene_variant ; gyrA ; c.-682C>T ; . ; . ; . ; . ;	upstream_gene_variant ; rrnO-16S ; n.-3498C>T ; . ; . ; . ; . ;	downstream_gene_variant ; dnaA ; c.*4562C>T ; . ; . ; . ; . ;	downstream_gene_variant ; dnaN ; c.*3237C>T ; . ; . ; . ; . ;
NC_000964.3	6315	A	G	225	hom	235	235	gyrB	gene-BSU_00060	4867	6783	+	synonymous_variant ; gyrB ; c.1449A>G ; p.Gly483Gly ; 1449/1917 ; 1449/1917 ; 483/638 ;	synonymous_variant ; gyrB ; c.1449A>G ; p.Gly483Gly ; 1449/1917 ; 1449/1917 ; 483/638 ;	upstream_gene_variant ; gyrA ; c.-679A>G ; . ; . ; . ; . ;	upstream_gene_variant ; rrnO-16S ; n.-3495A>G ; . ; . ; . ; . ;	downstream_gene_variant ; dnaA ; c.*4565A>G ; . ; . ; . ; . ;	downstream_gene_variant ; dnaN ; c.*3240A>G ; . ; . ; . ; . ;
NC_000964.3	6513	A	G	225	hom	301	301	gyrB	gene-BSU_00060	4867	6783	+	synonymous_variant ; gyrB ; c.1647A>G ; p.Ala549Ala ; 1647/1917 ; 1647/1917 ; 549/638 ;	synonymous_variant ; gyrB ; c.1647A>G ; p.Ala549Ala ; 1647/1917 ; 1647/1917 ; 549/638 ;	upstream_gene_variant ; gyrA ; c.-481A>G ; . ; . ; . ; . ;	upstream_gene_variant ; rrnO-16S ; n.-3297A>G ; . ; . ; . ; . ;	upstream_gene_variant ; trnO-Ile ; c.-4951A>G ; . ; . ; . ; . ;	downstream_gene_variant ; dnaA ; c.*4763A>G ; . ; . ; . ; . ;
NC_000964.3	6531	T	G	225	hom	288	288	gyrB	gene-BSU_00060	4867	6783	+	synonymous_variant ; gyrB ; c.1665T>G ; p.Leu555Leu ; 1665/1917 ; 1665/1917 ; 555/638 ;	synonymous_variant ; gyrB ; c.1665T>G ; p.Leu555Leu ; 1665/1917 ; 1665/1917 ; 555/638 ;	upstream_gene_variant ; gyrA ; c.-463T>G ; . ; . ; . ; . ;	upstream_gene_variant ; rrnO-16S ; n.-3279T>G ; . ; . ; . ; . ;	upstream_gene_variant ; trnO-Ile ; c.-4933T>G ; . ; . ; . ; . ;	downstream_gene_variant ; dnaA ; c.*4781T>G ; . ; . ; . ; . ;
NC_000964.3	6642	C	T	225	hom	237	237	gyrB	gene-BSU_00060	4867	6783	+	synonymous_variant ; gyrB ; c.1776C>T ; p.Ser592Ser ; 1776/1917 ; 1776/1917 ; 592/638 ;	synonymous_variant ; gyrB ; c.1776C>T ; p.Ser592Ser ; 1776/1917 ; 1776/1917 ; 592/638 ;	upstream_gene_variant ; gyrA ; c.-352C>T ; . ; . ; . ; . ;	upstream_gene_variant ; rrnO-16S ; n.-3168C>T ; . ; . ; . ; . ;	upstream_gene_variant ; trnO-Ile ; c.-4822C>T ; . ; . ; . ; . ;	upstream_gene_variant ; trnO-Ala ; c.-4910C>T ; . ; . ; . ; . ;
NC_000964.3	6690	T	C	225	hom	203	203	gyrB	gene-BSU_00060	4867	6783	+	synonymous_variant ; gyrB ; c.1824T>C ; p.Asp608Asp ; 1824/1917 ; 1824/1917 ; 608/638 ;	synonymous_variant ; gyrB ; c.1824T>C ; p.Asp608Asp ; 1824/1917 ; 1824/1917 ; 608/638 ;	upstream_gene_variant ; gyrA ; c.-304T>C ; . ; . ; . ; . ;	upstream_gene_variant ; rrnO-16S ; n.-3120T>C ; . ; . ; . ; . ;	upstream_gene_variant ; trnO-Ile ; c.-4774T>C ; . ; . ; . ; . ;	upstream_gene_variant ; trnO-Ala ; c.-4862T>C ; . ; . ; . ; . ;
NC_000964.3	6846	G	A	225	hom	150	150	.	.	.	.	.	.	upstream_gene_variant ; gyrA ; c.-148G>A ; . ; . ; . ; . ;	upstream_gene_variant ; rrnO-16S ; n.-2964G>A ; . ; . ; . ; . ;	upstream_gene_variant ; trnO-Ile ; c.-4618G>A ; . ; . ; . ; . ;	upstream_gene_variant ; trnO-Ala ; c.-4706G>A ; . ; . ; . ; . ;	upstream_gene_variant ; rrnO-23S ; n.-4863G>A ; . ; . ; . ; . ;
NC_000964.3	6851	C	T	225	hom	152	152	.	.	.	.	.	.	upstream_gene_variant ; gyrA ; c.-143C>T ; . ; . ; . ; . ;	upstream_gene_variant ; rrnO-16S ; n.-2959C>T ; . ; . ; . ; . ;	upstream_gene_variant ; trnO-Ile ; c.-4613C>T ; . ; . ; . ; . ;	upstream_gene_variant ; trnO-Ala ; c.-4701C>T ; . ; . ; . ; . ;	upstream_gene_variant ; rrnO-23S ; n.-4858C>T ; . ; . ; . ; . ;
NC_000964.3	7110	T	A	225	hom	183	183	gyrA	gene-BSU_00070	6994	9459	+	synonymous_variant ; gyrA ; c.117T>A ; p.Arg39Arg ; 117/2466 ; 117/2466 ; 39/821 ;	synonymous_variant ; gyrA ; c.117T>A ; p.Arg39Arg ; 117/2466 ; 117/2466 ; 39/821 ;	upstream_gene_variant ; rrnO-16S ; n.-2700T>A ; . ; . ; . ; . ;	upstream_gene_variant ; trnO-Ile ; c.-4354T>A ; . ; . ; . ; . ;	upstream_gene_variant ; trnO-Ala ; c.-4442T>A ; . ; . ; . ; . ;	upstream_gene_variant ; rrnO-23S ; n.-4599T>A ; . ; . ; . ; . ;
NC_000964.3	7314	C	T	225	hom	263	263	gyrA	gene-BSU_00070	6994	9459	+	synonymous_variant ; gyrA ; c.321C>T ; p.His107His ; 321/2466 ; 321/2466 ; 107/821 ;	synonymous_variant ; gyrA ; c.321C>T ; p.His107His ; 321/2466 ; 321/2466 ; 107/821 ;	upstream_gene_variant ; rrnO-16S ; n.-2496C>T ; . ; . ; . ; . ;	upstream_gene_variant ; trnO-Ile ; c.-4150C>T ; . ; . ; . ; . ;	upstream_gene_variant ; trnO-Ala ; c.-4238C>T ; . ; . ; . ; . ;	upstream_gene_variant ; rrnO-23S ; n.-4395C>T ; . ; . ; . ; . ;
NC_000964.3	7608	A	C	228	hom	267	266	gyrA	gene-BSU_00070	6994	9459	+	synonymous_variant ; gyrA ; c.615A>C ; p.Thr205Thr ; 615/2466 ; 615/2466 ; 205/821 ;	synonymous_variant ; gyrA ; c.615A>C ; p.Thr205Thr ; 615/2466 ; 615/2466 ; 205/821 ;	upstream_gene_variant ; rrnO-16S ; n.-2202A>C ; . ; . ; . ; . ;	upstream_gene_variant ; trnO-Ile ; c.-3856A>C ; . ; . ; . ; . ;	upstream_gene_variant ; trnO-Ala ; c.-3944A>C ; . ; . ; . ; . ;	upstream_gene_variant ; rrnO-23S ; n.-4101A>C ; . ; . ; . ; . ;
NC_000964.3	7938	T	C	225	hom	324	324	gyrA	gene-BSU_00070	6994	9459	+	synonymous_variant ; gyrA ; c.945T>C ; p.Val315Val ; 945/2466 ; 945/2466 ; 315/821 ;	synonymous_variant ; gyrA ; c.945T>C ; p.Val315Val ; 945/2466 ; 945/2466 ; 315/821 ;	upstream_gene_variant ; rrnO-16S ; n.-1872T>C ; . ; . ; . ; . ;	upstream_gene_variant ; trnO-Ile ; c.-3526T>C ; . ; . ; . ; . ;	upstream_gene_variant ; trnO-Ala ; c.-3614T>C ; . ; . ; . ; . ;	upstream_gene_variant ; rrnO-23S ; n.-3771T>C ; . ; . ; . ; . ;
NC_000964.3	8001	G	A	225	hom	283	283	gyrA	gene-BSU_00070	6994	9459	+	synonymous_variant ; gyrA ; c.1008G>A ; p.Ala336Ala ; 1008/2466 ; 1008/2466 ; 336/821 ;	synonymous_variant ; gyrA ; c.1008G>A ; p.Ala336Ala ; 1008/2466 ; 1008/2466 ; 336/821 ;	upstream_gene_variant ; rrnO-16S ; n.-1809G>A ; . ; . ; . ; . ;	upstream_gene_variant ; trnO-Ile ; c.-3463G>A ; . ; . ; . ; . ;	upstream_gene_variant ; trnO-Ala ; c.-3551G>A ; . ; . ; . ; . ;	upstream_gene_variant ; rrnO-23S ; n.-3708G>A ; . ; . ; . ; . ;
NC_000964.3	8328	G	A	225	hom	256	256	gyrA	gene-BSU_00070	6994	9459	+	synonymous_variant ; gyrA ; c.1335G>A ; p.Gln445Gln ; 1335/2466 ; 1335/2466 ; 445/821 ;	synonymous_variant ; gyrA ; c.1335G>A ; p.Gln445Gln ; 1335/2466 ; 1335/2466 ; 445/821 ;	upstream_gene_variant ; rrnO-16S ; n.-1482G>A ; . ; . ; . ; . ;	upstream_gene_variant ; trnO-Ile ; c.-3136G>A ; . ; . ; . ; . ;	upstream_gene_variant ; trnO-Ala ; c.-3224G>A ; . ; . ; . ; . ;	upstream_gene_variant ; rrnO-23S ; n.-3381G>A ; . ; . ; . ; . ;
NC_000964.3	8832	C	T	225	hom	128	128	gyrA	gene-BSU_00070	6994	9459	+	synonymous_variant ; gyrA ; c.1839C>T ; p.Leu613Leu ; 1839/2466 ; 1839/2466 ; 613/821 ;	synonymous_variant ; gyrA ; c.1839C>T ; p.Leu613Leu ; 1839/2466 ; 1839/2466 ; 613/821 ;	upstream_gene_variant ; rrnO-16S ; n.-978C>T ; . ; . ; . ; . ;	upstream_gene_variant ; trnO-Ile ; c.-2632C>T ; . ; . ; . ; . ;	upstream_gene_variant ; trnO-Ala ; c.-2720C>T ; . ; . ; . ; . ;	upstream_gene_variant ; rrnO-23S ; n.-2877C>T ; . ; . ; . ; . ;
NC_000964.3	8910	T	C	225	hom	215	215	gyrA	gene-BSU_00070	6994	9459	+	synonymous_variant ; gyrA ; c.1917T>C ; p.Ile639Ile ; 1917/2466 ; 1917/2466 ; 639/821 ;	synonymous_variant ; gyrA ; c.1917T>C ; p.Ile639Ile ; 1917/2466 ; 1917/2466 ; 639/821 ;	upstream_gene_variant ; rrnO-16S ; n.-900T>C ; . ; . ; . ; . ;	upstream_gene_variant ; trnO-Ile ; c.-2554T>C ; . ; . ; . ; . ;	upstream_gene_variant ; trnO-Ala ; c.-2642T>C ; . ; . ; . ; . ;	upstream_gene_variant ; rrnO-23S ; n.-2799T>C ; . ; . ; . ; . ;
NC_000964.3	9006	T	C	225	hom	307	307	gyrA	gene-BSU_00070	6994	9459	+	synonymous_variant ; gyrA ; c.2013T>C ; p.Ile671Ile ; 2013/2466 ; 2013/2466 ; 671/821 ;	synonymous_variant ; gyrA ; c.2013T>C ; p.Ile671Ile ; 2013/2466 ; 2013/2466 ; 671/821 ;	upstream_gene_variant ; rrnO-16S ; n.-804T>C ; . ; . ; . ; . ;	upstream_gene_variant ; trnO-Ile ; c.-2458T>C ; . ; . ; . ; . ;	upstream_gene_variant ; trnO-Ala ; c.-2546T>C ; . ; . ; . ; . ;	upstream_gene_variant ; rrnO-23S ; n.-2703T>C ; . ; . ; . ; . ;
NC_000964.3	9030	A	G	225	hom	350	350	gyrA	gene-BSU_00070	6994	9459	+	synonymous_variant ; gyrA ; c.2037A>G ; p.Arg679Arg ; 2037/2466 ; 2037/2466 ; 679/821 ;	synonymous_variant ; gyrA ; c.2037A>G ; p.Arg679Arg ; 2037/2466 ; 2037/2466 ; 679/821 ;	upstream_gene_variant ; rrnO-16S ; n.-780A>G ; . ; . ; . ; . ;	upstream_gene_variant ; trnO-Ile ; c.-2434A>G ; . ; . ; . ; . ;	upstream_gene_variant ; trnO-Ala ; c.-2522A>G ; . ; . ; . ; . ;	upstream_gene_variant ; rrnO-23S ; n.-2679A>G ; . ; . ; . ; . ;
NC_000964.3	9105	T	A	225	hom	418	418	gyrA	gene-BSU_00070	6994	9459	+	synonymous_variant ; gyrA ; c.2112T>A ; p.Ile704Ile ; 2112/2466 ; 2112/2466 ; 704/821 ;	synonymous_variant ; gyrA ; c.2112T>A ; p.Ile704Ile ; 2112/2466 ; 2112/2466 ; 704/821 ;	upstream_gene_variant ; rrnO-16S ; n.-705T>A ; . ; . ; . ; . ;	upstream_gene_variant ; trnO-Ile ; c.-2359T>A ; . ; . ; . ; . ;	upstream_gene_variant ; trnO-Ala ; c.-2447T>A ; . ; . ; . ; . ;	upstream_gene_variant ; rrnO-23S ; n.-2604T>A ; . ; . ; . ; . ;
NC_000964.3	9165	T	G	225	hom	495	495	gyrA	gene-BSU_00070	6994	9459	+	synonymous_variant ; gyrA ; c.2172T>G ; p.Pro724Pro ; 2172/2466 ; 2172/2466 ; 724/821 ;	synonymous_variant ; gyrA ; c.2172T>G ; p.Pro724Pro ; 2172/2466 ; 2172/2466 ; 724/821 ;	upstream_gene_variant ; rrnO-16S ; n.-645T>G ; . ; . ; . ; . ;	upstream_gene_variant ; trnO-Ile ; c.-2299T>G ; . ; . ; . ; . ;	upstream_gene_variant ; trnO-Ala ; c.-2387T>G ; . ; . ; . ; . ;	upstream_gene_variant ; rrnO-23S ; n.-2544T>G ; . ; . ; . ; . ;
NC_000964.3	9411	T	A	225	hom	275	275	gyrA	gene-BSU_00070	6994	9459	+	synonymous_variant ; gyrA ; c.2418T>A ; p.Val806Val ; 2418/2466 ; 2418/2466 ; 806/821 ;	synonymous_variant ; gyrA ; c.2418T>A ; p.Val806Val ; 2418/2466 ; 2418/2466 ; 806/821 ;	upstream_gene_variant ; rrnO-16S ; n.-399T>A ; . ; . ; . ; . ;	upstream_gene_variant ; trnO-Ile ; c.-2053T>A ; . ; . ; . ; . ;	upstream_gene_variant ; trnO-Ala ; c.-2141T>A ; . ; . ; . ; . ;	upstream_gene_variant ; rrnO-23S ; n.-2298T>A ; . ; . ; . ; . ;
NC_000964.3	9460	A	G	225	hom	201	201	.	.	.	.	.	.	upstream_gene_variant ; rrnO-16S ; n.-350A>G ; . ; . ; . ; . ;	upstream_gene_variant ; trnO-Ile ; c.-2004A>G ; . ; . ; . ; . ;	upstream_gene_variant ; trnO-Ala ; c.-2092A>G ; . ; . ; . ; . ;	upstream_gene_variant ; rrnO-23S ; n.-2249A>G ; . ; . ; . ; . ;	downstream_gene_variant ; recF ; c.*4911A>G ; . ; . ; . ; . ;
NC_000964.3	9644	T	C	225	hom	159	159	.	.	.	.	.	.	upstream_gene_variant ; rrnO-16S ; n.-166T>C ; . ; . ; . ; . ;	upstream_gene_variant ; trnO-Ile ; c.-1820T>C ; . ; . ; . ; . ;	upstream_gene_variant ; trnO-Ala ; c.-1908T>C ; . ; . ; . ; . ;	upstream_gene_variant ; rrnO-23S ; n.-2065T>C ; . ; . ; . ; . ;	downstream_gene_variant ; remB ; c.*4832T>C ; . ; . ; . ; . ;
NC_000964.3	14826	A	T	225	hom	95	95	.	.	.	.	.	.	upstream_gene_variant ; guaB ; c.-1089A>T ; . ; . ; . ; . ;	upstream_gene_variant ; dacA ; c.-2708A>T ; . ; . ; . ; . ;	upstream_gene_variant ; pdxS ; c.-4236A>T ; . ; . ; . ; . ;	downstream_gene_variant ; rrnO-16S ; n.*3462A>T ; . ; . ; . ; . ;	downstream_gene_variant ; trnO-Ile ; c.*3286A>T ; . ; . ; . ; . ;
NC_000964.3	17722	G	A	225	hom	352	352	dacA	gene-BSU_00100	17534	18865	+	synonymous_variant ; dacA ; c.189G>A ; p.Leu63Leu ; 189/1332 ; 189/1332 ; 63/443 ;	synonymous_variant ; dacA ; c.189G>A ; p.Leu63Leu ; 189/1332 ; 189/1332 ; 63/443 ;	upstream_gene_variant ; yaaC ; c.-1928C>T ; . ; . ; . ; . ;	upstream_gene_variant ; pdxS ; c.-1340G>A ; . ; . ; . ; . ;	upstream_gene_variant ; pdxT ; c.-2246G>A ; . ; . ; . ; . ;	upstream_gene_variant ; tboS ; n.-2889G>A ; . ; . ; . ; . ;
NC_000964.3	18265	G	A	225	hom	207	207	dacA	gene-BSU_00100	17534	18865	+	synonymous_variant ; dacA ; c.732G>A ; p.Gly244Gly ; 732/1332 ; 732/1332 ; 244/443 ;	synonymous_variant ; dacA ; c.732G>A ; p.Gly244Gly ; 732/1332 ; 732/1332 ; 244/443 ;	upstream_gene_variant ; yaaC ; c.-2471C>T ; . ; . ; . ; . ;	upstream_gene_variant ; pdxS ; c.-797G>A ; . ; . ; . ; . ;	upstream_gene_variant ; pdxT ; c.-1703G>A ; . ; . ; . ; . ;	upstream_gene_variant ; tboS ; n.-2346G>A ; . ; . ; . ; . ;
NC_000964.3	18433	A	G	225	hom	139	139	dacA	gene-BSU_00100	17534	18865	+	synonymous_variant ; dacA ; c.900A>G ; p.Lys300Lys ; 900/1332 ; 900/1332 ; 300/443 ;	synonymous_variant ; dacA ; c.900A>G ; p.Lys300Lys ; 900/1332 ; 900/1332 ; 300/443 ;	upstream_gene_variant ; yaaC ; c.-2639T>C ; . ; . ; . ; . ;	upstream_gene_variant ; pdxS ; c.-629A>G ; . ; . ; . ; . ;	upstream_gene_variant ; pdxT ; c.-1535A>G ; . ; . ; . ; . ;	upstream_gene_variant ; tboS ; n.-2178A>G ; . ; . ; . ; . ;
NC_000964.3	18634	C	T	225	hom	247	247	dacA	gene-BSU_00100	17534	18865	+	synonymous_variant ; dacA ; c.1101C>T ; p.Asp367Asp ; 1101/1332 ; 1101/1332 ; 367/443 ;	synonymous_variant ; dacA ; c.1101C>T ; p.Asp367Asp ; 1101/1332 ; 1101/1332 ; 367/443 ;	upstream_gene_variant ; yaaC ; c.-2840G>A ; . ; . ; . ; . ;	upstream_gene_variant ; pdxS ; c.-428C>T ; . ; . ; . ; . ;	upstream_gene_variant ; pdxT ; c.-1334C>T ; . ; . ; . ; . ;	upstream_gene_variant ; tboS ; n.-1977C>T ; . ; . ; . ; . ;
NC_000964.3	18983	G	C	225	hom	245	245	.	.	.	.	.	.	upstream_gene_variant ; yaaC ; c.-3189C>G ; . ; . ; . ; . ;	upstream_gene_variant ; pdxS ; c.-79G>C ; . ; . ; . ; . ;	upstream_gene_variant ; pdxT ; c.-985G>C ; . ; . ; . ; . ;	upstream_gene_variant ; tboS ; n.-1628G>C ; . ; . ; . ; . ;	upstream_gene_variant ; serS ; c.-1897G>C ; . ; . ; . ; . ;
NC_000964.3	19018	G	A	225	hom	351	351	.	.	.	.	.	.	upstream_gene_variant ; yaaC ; c.-3224C>T ; . ; . ; . ; . ;	upstream_gene_variant ; pdxS ; c.-44G>A ; . ; . ; . ; . ;	upstream_gene_variant ; pdxT ; c.-950G>A ; . ; . ; . ; . ;	upstream_gene_variant ; tboS ; n.-1593G>A ; . ; . ; . ; . ;	upstream_gene_variant ; serS ; c.-1862G>A ; . ; . ; . ; . ;
NC_000964.3	19313	C	A	225	hom	526	526	pdxS	gene-BSU_00110	19062	19946	+	synonymous_variant ; pdxS ; c.252C>A ; p.Ile84Ile ; 252/885 ; 252/885 ; 84/294 ;	synonymous_variant ; pdxS ; c.252C>A ; p.Ile84Ile ; 252/885 ; 252/885 ; 84/294 ;	upstream_gene_variant ; yaaC ; c.-3519G>T ; . ; . ; . ; . ;	upstream_gene_variant ; pdxT ; c.-655C>A ; . ; . ; . ; . ;	upstream_gene_variant ; tboS ; n.-1298C>A ; . ; . ; . ; . ;	upstream_gene_variant ; serS ; c.-1567C>A ; . ; . ; . ; . ;
NC_000964.3	19334	T	C	225	hom	453	453	pdxS	gene-BSU_00110	19062	19946	+	synonymous_variant ; pdxS ; c.273T>C ; p.Arg91Arg ; 273/885 ; 273/885 ; 91/294 ;	synonymous_variant ; pdxS ; c.273T>C ; p.Arg91Arg ; 273/885 ; 273/885 ; 91/294 ;	upstream_gene_variant ; yaaC ; c.-3540A>G ; . ; . ; . ; . ;	upstream_gene_variant ; pdxT ; c.-634T>C ; . ; . ; . ; . ;	upstream_gene_variant ; tboS ; n.-1277T>C ; . ; . ; . ; . ;	upstream_gene_variant ; serS ; c.-1546T>C ; . ; . ; . ; . ;
NC_000964.3	19388	G	A	225	hom	349	349	pdxS	gene-BSU_00110	19062	19946	+	synonymous_variant ; pdxS ; c.327G>A ; p.Pro109Pro ; 327/885 ; 327/885 ; 109/294 ;	synonymous_variant ; pdxS ; c.327G>A ; p.Pro109Pro ; 327/885 ; 327/885 ; 109/294 ;	upstream_gene_variant ; yaaC ; c.-3594C>T ; . ; . ; . ; . ;	upstream_gene_variant ; pdxT ; c.-580G>A ; . ; . ; . ; . ;	upstream_gene_variant ; tboS ; n.-1223G>A ; . ; . ; . ; . ;	upstream_gene_variant ; serS ; c.-1492G>A ; . ; . ; . ; . ;
NC_000964.3	19556	T	C	225	hom	248	248	pdxS	gene-BSU_00110	19062	19946	+	synonymous_variant ; pdxS ; c.495T>C ; p.Arg165Arg ; 495/885 ; 495/885 ; 165/294 ;	synonymous_variant ; pdxS ; c.495T>C ; p.Arg165Arg ; 495/885 ; 495/885 ; 165/294 ;	upstream_gene_variant ; yaaC ; c.-3762A>G ; . ; . ; . ; . ;	upstream_gene_variant ; pdxT ; c.-412T>C ; . ; . ; . ; . ;	upstream_gene_variant ; tboS ; n.-1055T>C ; . ; . ; . ; . ;	upstream_gene_variant ; serS ; c.-1324T>C ; . ; . ; . ; . ;
NC_000964.3	19604	G	A	225	hom	239	239	pdxS	gene-BSU_00110	19062	19946	+	synonymous_variant ; pdxS ; c.543G>A ; p.Glu181Glu ; 543/885 ; 543/885 ; 181/294 ;	synonymous_variant ; pdxS ; c.543G>A ; p.Glu181Glu ; 543/885 ; 543/885 ; 181/294 ;	upstream_gene_variant ; yaaC ; c.-3810C>T ; . ; . ; . ; . ;	upstream_gene_variant ; pdxT ; c.-364G>A ; . ; . ; . ; . ;	upstream_gene_variant ; tboS ; n.-1007G>A ; . ; . ; . ; . ;	upstream_gene_variant ; serS ; c.-1276G>A ; . ; . ; . ; . ;
NC_000964.3	19742	T	C	225	hom	245	245	pdxS	gene-BSU_00110	19062	19946	+	synonymous_variant ; pdxS ; c.681T>C ; p.Leu227Leu ; 681/885 ; 681/885 ; 227/294 ;	synonymous_variant ; pdxS ; c.681T>C ; p.Leu227Leu ; 681/885 ; 681/885 ; 227/294 ;	upstream_gene_variant ; yaaC ; c.-3948A>G ; . ; . ; . ; . ;	upstream_gene_variant ; pdxT ; c.-226T>C ; . ; . ; . ; . ;	upstream_gene_variant ; tboS ; n.-869T>C ; . ; . ; . ; . ;	upstream_gene_variant ; serS ; c.-1138T>C ; . ; . ; . ; . ;
NC_000964.3	19778	T	C	225	hom	233	233	pdxS	gene-BSU_00110	19062	19946	+	synonymous_variant ; pdxS ; c.717T>C ; p.Phe239Phe ; 717/885 ; 717/885 ; 239/294 ;	synonymous_variant ; pdxS ; c.717T>C ; p.Phe239Phe ; 717/885 ; 717/885 ; 239/294 ;	upstream_gene_variant ; yaaC ; c.-3984A>G ; . ; . ; . ; . ;	upstream_gene_variant ; pdxT ; c.-190T>C ; . ; . ; . ; . ;	upstream_gene_variant ; tboS ; n.-833T>C ; . ; . ; . ; . ;	upstream_gene_variant ; serS ; c.-1102T>C ; . ; . ; . ; . ;
NC_000964.3	19850	A	G	225	hom	284	284	pdxS	gene-BSU_00110	19062	19946	+	synonymous_variant ; pdxS ; c.789A>G ; p.Leu263Leu ; 789/885 ; 789/885 ; 263/294 ;	synonymous_variant ; pdxS ; c.789A>G ; p.Leu263Leu ; 789/885 ; 789/885 ; 263/294 ;	upstream_gene_variant ; yaaC ; c.-4056T>C ; . ; . ; . ; . ;	upstream_gene_variant ; pdxT ; c.-118A>G ; . ; . ; . ; . ;	upstream_gene_variant ; tboS ; n.-761A>G ; . ; . ; . ; . ;	upstream_gene_variant ; serS ; c.-1030A>G ; . ; . ; . ; . ;
NC_000964.3	19854	G	T	225	hom	285	285	pdxS	gene-BSU_00110	19062	19946	+	missense_variant ; pdxS ; c.793G>T ; p.Ala265Ser ; 793/885 ; 793/885 ; 265/294 ;	missense_variant ; pdxS ; c.793G>T ; p.Ala265Ser ; 793/885 ; 793/885 ; 265/294 ;	upstream_gene_variant ; yaaC ; c.-4060C>A ; . ; . ; . ; . ;	upstream_gene_variant ; pdxT ; c.-114G>T ; . ; . ; . ; . ;	upstream_gene_variant ; tboS ; n.-757G>T ; . ; . ; . ; . ;	upstream_gene_variant ; serS ; c.-1026G>T ; . ; . ; . ; . ;
NC_000964.3	20102	G	A	225	hom	332	332	pdxT	gene-BSU_00120	19968	20558	+	synonymous_variant ; pdxT ; c.135G>A ; p.Pro45Pro ; 135/591 ; 135/591 ; 45/196 ;	synonymous_variant ; pdxT ; c.135G>A ; p.Pro45Pro ; 135/591 ; 135/591 ; 45/196 ;	upstream_gene_variant ; yaaC ; c.-4308C>T ; . ; . ; . ; . ;	upstream_gene_variant ; tboS ; n.-509G>A ; . ; . ; . ; . ;	upstream_gene_variant ; serS ; c.-778G>A ; . ; . ; . ; . ;	upstream_gene_variant ; trnSL-Ser1 ; c.-2190G>A ; . ; . ; . ; . ;
NC_000964.3	21194	G	A	225	hom	310	310	serS	gene-BSU_00130	20880	22157	+	synonymous_variant ; serS ; c.315G>A ; p.Pro105Pro ; 315/1278 ; 315/1278 ; 105/425 ;	synonymous_variant ; serS ; c.315G>A ; p.Pro105Pro ; 315/1278 ; 315/1278 ; 105/425 ;	upstream_gene_variant ; trnSL-Ser1 ; c.-1098G>A ; . ; . ; . ; . ;	upstream_gene_variant ; tadA ; c.-4658G>A ; . ; . ; . ; . ;	downstream_gene_variant ; guaB ; c.*3813G>A ; . ; . ; . ; . ;	downstream_gene_variant ; dacA ; c.*2329G>A ; . ; . ; . ; . ;
NC_000964.3	21782	A	G	225	hom	168	168	serS	gene-BSU_00130	20880	22157	+	synonymous_variant ; serS ; c.903A>G ; p.Lys301Lys ; 903/1278 ; 903/1278 ; 301/425 ;	synonymous_variant ; serS ; c.903A>G ; p.Lys301Lys ; 903/1278 ; 903/1278 ; 301/425 ;	upstream_gene_variant ; trnSL-Ser1 ; c.-510A>G ; . ; . ; . ; . ;	upstream_gene_variant ; tadA ; c.-4070A>G ; . ; . ; . ; . ;	upstream_gene_variant ; scr ; n.-4597A>G ; . ; . ; . ; . ;	downstream_gene_variant ; guaB ; c.*4401A>G ; . ; . ; . ; . ;
NC_000964.3	22031	C	T	225	hom	219	219	serS	gene-BSU_00130	20880	22157	+	synonymous_variant ; serS ; c.1152C>T ; p.Gly384Gly ; 1152/1278 ; 1152/1278 ; 384/425 ;	synonymous_variant ; serS ; c.1152C>T ; p.Gly384Gly ; 1152/1278 ; 1152/1278 ; 384/425 ;	upstream_gene_variant ; trnSL-Ser1 ; c.-261C>T ; . ; . ; . ; . ;	upstream_gene_variant ; tadA ; c.-3821C>T ; . ; . ; . ; . ;	upstream_gene_variant ; scr ; n.-4348C>T ; . ; . ; . ; . ;	upstream_gene_variant ; dnaX ; c.-4783C>T ; . ; . ; . ; . ;
NC_000964.3	22061	T	C	225	hom	209	209	serS	gene-BSU_00130	20880	22157	+	synonymous_variant ; serS ; c.1182T>C ; p.Ala394Ala ; 1182/1278 ; 1182/1278 ; 394/425 ;	synonymous_variant ; serS ; c.1182T>C ; p.Ala394Ala ; 1182/1278 ; 1182/1278 ; 394/425 ;	upstream_gene_variant ; trnSL-Ser1 ; c.-231T>C ; . ; . ; . ; . ;	upstream_gene_variant ; tadA ; c.-3791T>C ; . ; . ; . ; . ;	upstream_gene_variant ; scr ; n.-4318T>C ; . ; . ; . ; . ;	upstream_gene_variant ; dnaX ; c.-4753T>C ; . ; . ; . ; . ;
NC_000964.3	22064	T	A	225	hom	211	211	serS	gene-BSU_00130	20880	22157	+	synonymous_variant ; serS ; c.1185T>A ; p.Ala395Ala ; 1185/1278 ; 1185/1278 ; 395/425 ;	synonymous_variant ; serS ; c.1185T>A ; p.Ala395Ala ; 1185/1278 ; 1185/1278 ; 395/425 ;	upstream_gene_variant ; trnSL-Ser1 ; c.-228T>A ; . ; . ; . ; . ;	upstream_gene_variant ; tadA ; c.-3788T>A ; . ; . ; . ; . ;	upstream_gene_variant ; scr ; n.-4315T>A ; . ; . ; . ; . ;	upstream_gene_variant ; dnaX ; c.-4750T>A ; . ; . ; . ; . ;
NC_000964.3	22135	A	G	225	hom	184	184	serS	gene-BSU_00130	20880	22157	+	missense_variant ; serS ; c.1256A>G ; p.Asn419Ser ; 1256/1278 ; 1256/1278 ; 419/425 ;	missense_variant ; serS ; c.1256A>G ; p.Asn419Ser ; 1256/1278 ; 1256/1278 ; 419/425 ;	upstream_gene_variant ; trnSL-Ser1 ; c.-157A>G ; . ; . ; . ; . ;	upstream_gene_variant ; tadA ; c.-3717A>G ; . ; . ; . ; . ;	upstream_gene_variant ; scr ; n.-4244A>G ; . ; . ; . ; . ;	upstream_gene_variant ; dnaX ; c.-4679A>G ; . ; . ; . ; . ;
NC_000964.3	22148	G	A	225	hom	177	177	serS	gene-BSU_00130	20880	22157	+	missense_variant ; serS ; c.1269G>A ; p.Met423Ile ; 1269/1278 ; 1269/1278 ; 423/425 ;	missense_variant ; serS ; c.1269G>A ; p.Met423Ile ; 1269/1278 ; 1269/1278 ; 423/425 ;	upstream_gene_variant ; trnSL-Ser1 ; c.-144G>A ; . ; . ; . ; . ;	upstream_gene_variant ; tadA ; c.-3704G>A ; . ; . ; . ; . ;	upstream_gene_variant ; scr ; n.-4231G>A ; . ; . ; . ; . ;	upstream_gene_variant ; dnaX ; c.-4666G>A ; . ; . ; . ; . ;
NC_000964.3	22208	C	T	225	hom	142	142	.	.	.	.	.	.	upstream_gene_variant ; trnSL-Ser1 ; c.-84C>T ; . ; . ; . ; . ;	upstream_gene_variant ; tadA ; c.-3644C>T ; . ; . ; . ; . ;	upstream_gene_variant ; scr ; n.-4171C>T ; . ; . ; . ; . ;	upstream_gene_variant ; dnaX ; c.-4606C>T ; . ; . ; . ; . ;	downstream_gene_variant ; guaB ; c.*4827C>T ; . ; . ; . ; . ;
NC_000964.3	22277	T	A	225	hom	113	113	.	.	.	.	.	.	upstream_gene_variant ; trnSL-Ser1 ; c.-15T>A ; . ; . ; . ; . ;	upstream_gene_variant ; tadA ; c.-3575T>A ; . ; . ; . ; . ;	upstream_gene_variant ; scr ; n.-4102T>A ; . ; . ; . ; . ;	upstream_gene_variant ; dnaX ; c.-4537T>A ; . ; . ; . ; . ;	downstream_gene_variant ; guaB ; c.*4896T>A ; . ; . ; . ; . ;
NC_000964.3	22278	A	G	225	hom	113	113	.	.	.	.	.	.	upstream_gene_variant ; trnSL-Ser1 ; c.-14A>G ; . ; . ; . ; . ;	upstream_gene_variant ; tadA ; c.-3574A>G ; . ; . ; . ; . ;	upstream_gene_variant ; scr ; n.-4101A>G ; . ; . ; . ; . ;	upstream_gene_variant ; dnaX ; c.-4536A>G ; . ; . ; . ; . ;	downstream_gene_variant ; guaB ; c.*4897A>G ; . ; . ; . ; . ;
NC_000964.3	22607	G	A	225	hom	95	95	dck	gene-BSU_00140	22496	23149	-	synonymous_variant ; dck ; c.543C>T ; p.Cys181Cys ; 543/654 ; 543/654 ; 181/217 ;	synonymous_variant ; dck ; c.543C>T ; p.Cys181Cys ; 543/654 ; 543/654 ; 181/217 ;	upstream_gene_variant ; tadA ; c.-3245G>A ; . ; . ; . ; . ;	upstream_gene_variant ; scr ; n.-3772G>A ; . ; . ; . ; . ;	upstream_gene_variant ; dnaX ; c.-4207G>A ; . ; . ; . ; . ;	downstream_gene_variant ; dacA ; c.*3742G>A ; . ; . ; . ; . ;
NC_000964.3	22669	G	T	225	hom	109	109	dck	gene-BSU_00140	22496	23149	-	synonymous_variant ; dck ; c.481C>A ; p.Arg161Arg ; 481/654 ; 481/654 ; 161/217 ;	synonymous_variant ; dck ; c.481C>A ; p.Arg161Arg ; 481/654 ; 481/654 ; 161/217 ;	upstream_gene_variant ; tadA ; c.-3183G>T ; . ; . ; . ; . ;	upstream_gene_variant ; scr ; n.-3710G>T ; . ; . ; . ; . ;	upstream_gene_variant ; dnaX ; c.-4145G>T ; . ; . ; . ; . ;	downstream_gene_variant ; dacA ; c.*3804G>T ; . ; . ; . ; . ;
NC_000964.3	22691	A	G	225	hom	108	108	dck	gene-BSU_00140	22496	23149	-	synonymous_variant ; dck ; c.459T>C ; p.Arg153Arg ; 459/654 ; 459/654 ; 153/217 ;	synonymous_variant ; dck ; c.459T>C ; p.Arg153Arg ; 459/654 ; 459/654 ; 153/217 ;	upstream_gene_variant ; tadA ; c.-3161A>G ; . ; . ; . ; . ;	upstream_gene_variant ; scr ; n.-3688A>G ; . ; . ; . ; . ;	upstream_gene_variant ; dnaX ; c.-4123A>G ; . ; . ; . ; . ;	downstream_gene_variant ; dacA ; c.*3826A>G ; . ; . ; . ; . ;
NC_000964.3	22760	A	G	225	hom	99	99	dck	gene-BSU_00140	22496	23149	-	synonymous_variant ; dck ; c.390T>C ; p.His130His ; 390/654 ; 390/654 ; 130/217 ;	synonymous_variant ; dck ; c.390T>C ; p.His130His ; 390/654 ; 390/654 ; 130/217 ;	upstream_gene_variant ; tadA ; c.-3092A>G ; . ; . ; . ; . ;	upstream_gene_variant ; scr ; n.-3619A>G ; . ; . ; . ; . ;	upstream_gene_variant ; dnaX ; c.-4054A>G ; . ; . ; . ; . ;	downstream_gene_variant ; dacA ; c.*3895A>G ; . ; . ; . ; . ;
NC_000964.3	22781	T	C	225	hom	96	96	dck	gene-BSU_00140	22496	23149	-	synonymous_variant ; dck ; c.369A>G ; p.Val123Val ; 369/654 ; 369/654 ; 123/217 ;	synonymous_variant ; dck ; c.369A>G ; p.Val123Val ; 369/654 ; 369/654 ; 123/217 ;	upstream_gene_variant ; tadA ; c.-3071T>C ; . ; . ; . ; . ;	upstream_gene_variant ; scr ; n.-3598T>C ; . ; . ; . ; . ;	upstream_gene_variant ; dnaX ; c.-4033T>C ; . ; . ; . ; . ;	downstream_gene_variant ; dacA ; c.*3916T>C ; . ; . ; . ; . ;
NC_000964.3	22955	G	A	225	hom	57	57	dck	gene-BSU_00140	22496	23149	-	synonymous_variant ; dck ; c.195C>T ; p.Tyr65Tyr ; 195/654 ; 195/654 ; 65/217 ;	synonymous_variant ; dck ; c.195C>T ; p.Tyr65Tyr ; 195/654 ; 195/654 ; 65/217 ;	upstream_gene_variant ; tadA ; c.-2897G>A ; . ; . ; . ; . ;	upstream_gene_variant ; scr ; n.-3424G>A ; . ; . ; . ; . ;	upstream_gene_variant ; dnaX ; c.-3859G>A ; . ; . ; . ; . ;	downstream_gene_variant ; dacA ; c.*4090G>A ; . ; . ; . ; . ;
NC_000964.3	23009	A	G	225	hom	54	54	dck	gene-BSU_00140	22496	23149	-	synonymous_variant ; dck ; c.141T>C ; p.Tyr47Tyr ; 141/654 ; 141/654 ; 47/217 ;	synonymous_variant ; dck ; c.141T>C ; p.Tyr47Tyr ; 141/654 ; 141/654 ; 47/217 ;	upstream_gene_variant ; tadA ; c.-2843A>G ; . ; . ; . ; . ;	upstream_gene_variant ; scr ; n.-3370A>G ; . ; . ; . ; . ;	upstream_gene_variant ; dnaX ; c.-3805A>G ; . ; . ; . ; . ;	downstream_gene_variant ; dacA ; c.*4144A>G ; . ; . ; . ; . ;
NC_000964.3	23036	C	A	225	hom	58	58	dck	gene-BSU_00140	22496	23149	-	synonymous_variant ; dck ; c.114G>T ; p.Ser38Ser ; 114/654 ; 114/654 ; 38/217 ;	synonymous_variant ; dck ; c.114G>T ; p.Ser38Ser ; 114/654 ; 114/654 ; 38/217 ;	upstream_gene_variant ; tadA ; c.-2816C>A ; . ; . ; . ; . ;	upstream_gene_variant ; scr ; n.-3343C>A ; . ; . ; . ; . ;	upstream_gene_variant ; dnaX ; c.-3778C>A ; . ; . ; . ; . ;	downstream_gene_variant ; dacA ; c.*4171C>A ; . ; . ; . ; . ;
NC_000964.3	23476	T	G	225	hom	91	91	dgk	gene-BSU_00150	23146	23769	-	synonymous_variant ; dgk ; c.294A>C ; p.Arg98Arg ; 294/624 ; 294/624 ; 98/207 ;	synonymous_variant ; dgk ; c.294A>C ; p.Arg98Arg ; 294/624 ; 294/624 ; 98/207 ;	upstream_gene_variant ; dck ; c.-327A>C ; . ; . ; . ; . ;	upstream_gene_variant ; tadA ; c.-2376T>G ; . ; . ; . ; . ;	upstream_gene_variant ; scr ; n.-2903T>G ; . ; . ; . ; . ;	upstream_gene_variant ; dnaX ; c.-3338T>G ; . ; . ; . ; . ;
NC_000964.3	23619	T	C	225	hom	82	82	dgk	gene-BSU_00150	23146	23769	-	missense_variant ; dgk ; c.151A>G ; p.Lys51Glu ; 151/624 ; 151/624 ; 51/207 ;	missense_variant ; dgk ; c.151A>G ; p.Lys51Glu ; 151/624 ; 151/624 ; 51/207 ;	upstream_gene_variant ; dck ; c.-470A>G ; . ; . ; . ; . ;	upstream_gene_variant ; tadA ; c.-2233T>C ; . ; . ; . ; . ;	upstream_gene_variant ; scr ; n.-2760T>C ; . ; . ; . ; . ;	upstream_gene_variant ; dnaX ; c.-3195T>C ; . ; . ; . ; . ;
NC_000964.3	23689	T	C	225	hom	84	84	dgk	gene-BSU_00150	23146	23769	-	synonymous_variant ; dgk ; c.81A>G ; p.Lys27Lys ; 81/624 ; 81/624 ; 27/207 ;	synonymous_variant ; dgk ; c.81A>G ; p.Lys27Lys ; 81/624 ; 81/624 ; 27/207 ;	upstream_gene_variant ; dck ; c.-540A>G ; . ; . ; . ; . ;	upstream_gene_variant ; tadA ; c.-2163T>C ; . ; . ; . ; . ;	upstream_gene_variant ; scr ; n.-2690T>C ; . ; . ; . ; . ;	upstream_gene_variant ; dnaX ; c.-3125T>C ; . ; . ; . ; . ;
NC_000964.3	23691	T	C	225	hom	84	84	dgk	gene-BSU_00150	23146	23769	-	missense_variant ; dgk ; c.79A>G ; p.Lys27Glu ; 79/624 ; 79/624 ; 27/207 ;	missense_variant ; dgk ; c.79A>G ; p.Lys27Glu ; 79/624 ; 79/624 ; 27/207 ;	upstream_gene_variant ; dck ; c.-542A>G ; . ; . ; . ; . ;	upstream_gene_variant ; tadA ; c.-2161T>C ; . ; . ; . ; . ;	upstream_gene_variant ; scr ; n.-2688T>C ; . ; . ; . ; . ;	upstream_gene_variant ; dnaX ; c.-3123T>C ; . ; . ; . ; . ;
NC_000964.3	24153	T	C	225	hom	266	266	sleL	gene-BSU_00160	23868	25151	-	synonymous_variant ; sleL ; c.999A>G ; p.Pro333Pro ; 999/1284 ; 999/1284 ; 333/427 ;	synonymous_variant ; sleL ; c.999A>G ; p.Pro333Pro ; 999/1284 ; 999/1284 ; 333/427 ;	upstream_gene_variant ; dck ; c.-1004A>G ; . ; . ; . ; . ;	upstream_gene_variant ; dgk ; c.-384A>G ; . ; . ; . ; . ;	upstream_gene_variant ; tadA ; c.-1699T>C ; . ; . ; . ; . ;	upstream_gene_variant ; scr ; n.-2226T>C ; . ; . ; . ; . ;
NC_000964.3	24297	T	C	225	hom	279	279	sleL	gene-BSU_00160	23868	25151	-	synonymous_variant ; sleL ; c.855A>G ; p.Gly285Gly ; 855/1284 ; 855/1284 ; 285/427 ;	synonymous_variant ; sleL ; c.855A>G ; p.Gly285Gly ; 855/1284 ; 855/1284 ; 285/427 ;	upstream_gene_variant ; dck ; c.-1148A>G ; . ; . ; . ; . ;	upstream_gene_variant ; dgk ; c.-528A>G ; . ; . ; . ; . ;	upstream_gene_variant ; tadA ; c.-1555T>C ; . ; . ; . ; . ;	upstream_gene_variant ; scr ; n.-2082T>C ; . ; . ; . ; . ;
NC_000964.3	24350	C	G	225	hom	263	263	sleL	gene-BSU_00160	23868	25151	-	missense_variant ; sleL ; c.802G>C ; p.Glu268Gln ; 802/1284 ; 802/1284 ; 268/427 ;	missense_variant ; sleL ; c.802G>C ; p.Glu268Gln ; 802/1284 ; 802/1284 ; 268/427 ;	upstream_gene_variant ; dck ; c.-1201G>C ; . ; . ; . ; . ;	upstream_gene_variant ; dgk ; c.-581G>C ; . ; . ; . ; . ;	upstream_gene_variant ; tadA ; c.-1502C>G ; . ; . ; . ; . ;	upstream_gene_variant ; scr ; n.-2029C>G ; . ; . ; . ; . ;
NC_000964.3	24357	T	C	225	hom	255	255	sleL	gene-BSU_00160	23868	25151	-	synonymous_variant ; sleL ; c.795A>G ; p.Ala265Ala ; 795/1284 ; 795/1284 ; 265/427 ;	synonymous_variant ; sleL ; c.795A>G ; p.Ala265Ala ; 795/1284 ; 795/1284 ; 265/427 ;	upstream_gene_variant ; dck ; c.-1208A>G ; . ; . ; . ; . ;	upstream_gene_variant ; dgk ; c.-588A>G ; . ; . ; . ; . ;	upstream_gene_variant ; tadA ; c.-1495T>C ; . ; . ; . ; . ;	upstream_gene_variant ; scr ; n.-2022T>C ; . ; . ; . ; . ;
NC_000964.3	24384	C	T	225	hom	232	232	sleL	gene-BSU_00160	23868	25151	-	synonymous_variant ; sleL ; c.768G>A ; p.Arg256Arg ; 768/1284 ; 768/1284 ; 256/427 ;	synonymous_variant ; sleL ; c.768G>A ; p.Arg256Arg ; 768/1284 ; 768/1284 ; 256/427 ;	upstream_gene_variant ; dck ; c.-1235G>A ; . ; . ; . ; . ;	upstream_gene_variant ; dgk ; c.-615G>A ; . ; . ; . ; . ;	upstream_gene_variant ; tadA ; c.-1468C>T ; . ; . ; . ; . ;	upstream_gene_variant ; scr ; n.-1995C>T ; . ; . ; . ; . ;
NC_000964.3	24450	G	A	225	hom	168	168	sleL	gene-BSU_00160	23868	25151	-	synonymous_variant ; sleL ; c.702C>T ; p.Phe234Phe ; 702/1284 ; 702/1284 ; 234/427 ;	synonymous_variant ; sleL ; c.702C>T ; p.Phe234Phe ; 702/1284 ; 702/1284 ; 234/427 ;	upstream_gene_variant ; dck ; c.-1301C>T ; . ; . ; . ; . ;	upstream_gene_variant ; dgk ; c.-681C>T ; . ; . ; . ; . ;	upstream_gene_variant ; tadA ; c.-1402G>A ; . ; . ; . ; . ;	upstream_gene_variant ; scr ; n.-1929G>A ; . ; . ; . ; . ;
NC_000964.3	24474	G	A	225	hom	147	147	sleL	gene-BSU_00160	23868	25151	-	synonymous_variant ; sleL ; c.678C>T ; p.Phe226Phe ; 678/1284 ; 678/1284 ; 226/427 ;	synonymous_variant ; sleL ; c.678C>T ; p.Phe226Phe ; 678/1284 ; 678/1284 ; 226/427 ;	upstream_gene_variant ; dck ; c.-1325C>T ; . ; . ; . ; . ;	upstream_gene_variant ; dgk ; c.-705C>T ; . ; . ; . ; . ;	upstream_gene_variant ; tadA ; c.-1378G>A ; . ; . ; . ; . ;	upstream_gene_variant ; scr ; n.-1905G>A ; . ; . ; . ; . ;
NC_000964.3	24549	T	C	225	hom	113	113	sleL	gene-BSU_00160	23868	25151	-	synonymous_variant ; sleL ; c.603A>G ; p.Arg201Arg ; 603/1284 ; 603/1284 ; 201/427 ;	synonymous_variant ; sleL ; c.603A>G ; p.Arg201Arg ; 603/1284 ; 603/1284 ; 201/427 ;	upstream_gene_variant ; dck ; c.-1400A>G ; . ; . ; . ; . ;	upstream_gene_variant ; dgk ; c.-780A>G ; . ; . ; . ; . ;	upstream_gene_variant ; tadA ; c.-1303T>C ; . ; . ; . ; . ;	upstream_gene_variant ; scr ; n.-1830T>C ; . ; . ; . ; . ;
NC_000964.3	24550	C	T	225	hom	113	113	sleL	gene-BSU_00160	23868	25151	-	missense_variant ; sleL ; c.602G>A ; p.Arg201Lys ; 602/1284 ; 602/1284 ; 201/427 ;	missense_variant ; sleL ; c.602G>A ; p.Arg201Lys ; 602/1284 ; 602/1284 ; 201/427 ;	upstream_gene_variant ; dck ; c.-1401G>A ; . ; . ; . ; . ;	upstream_gene_variant ; dgk ; c.-781G>A ; . ; . ; . ; . ;	upstream_gene_variant ; tadA ; c.-1302C>T ; . ; . ; . ; . ;	upstream_gene_variant ; scr ; n.-1829C>T ; . ; . ; . ; . ;
NC_000964.3	24561	G	C	225	hom	125	125	sleL	gene-BSU_00160	23868	25151	-	synonymous_variant ; sleL ; c.591C>G ; p.Val197Val ; 591/1284 ; 591/1284 ; 197/427 ;	synonymous_variant ; sleL ; c.591C>G ; p.Val197Val ; 591/1284 ; 591/1284 ; 197/427 ;	upstream_gene_variant ; dck ; c.-1412C>G ; . ; . ; . ; . ;	upstream_gene_variant ; dgk ; c.-792C>G ; . ; . ; . ; . ;	upstream_gene_variant ; tadA ; c.-1291G>C ; . ; . ; . ; . ;	upstream_gene_variant ; scr ; n.-1818G>C ; . ; . ; . ; . ;
NC_000964.3	24581	G	T	225	hom	126	126	sleL	gene-BSU_00160	23868	25151	-	synonymous_variant ; sleL ; c.571C>A ; p.Arg191Arg ; 571/1284 ; 571/1284 ; 191/427 ;	synonymous_variant ; sleL ; c.571C>A ; p.Arg191Arg ; 571/1284 ; 571/1284 ; 191/427 ;	upstream_gene_variant ; dck ; c.-1432C>A ; . ; . ; . ; . ;	upstream_gene_variant ; dgk ; c.-812C>A ; . ; . ; . ; . ;	upstream_gene_variant ; tadA ; c.-1271G>T ; . ; . ; . ; . ;	upstream_gene_variant ; scr ; n.-1798G>T ; . ; . ; . ; . ;
NC_000964.3	24627	G	A	225	hom	137	137	sleL	gene-BSU_00160	23868	25151	-	synonymous_variant ; sleL ; c.525C>T ; p.Ser175Ser ; 525/1284 ; 525/1284 ; 175/427 ;	synonymous_variant ; sleL ; c.525C>T ; p.Ser175Ser ; 525/1284 ; 525/1284 ; 175/427 ;	upstream_gene_variant ; dck ; c.-1478C>T ; . ; . ; . ; . ;	upstream_gene_variant ; dgk ; c.-858C>T ; . ; . ; . ; . ;	upstream_gene_variant ; tadA ; c.-1225G>A ; . ; . ; . ; . ;	upstream_gene_variant ; scr ; n.-1752G>A ; . ; . ; . ; . ;
NC_000964.3	24630	G	A	225	hom	138	138	sleL	gene-BSU_00160	23868	25151	-	synonymous_variant ; sleL ; c.522C>T ; p.Phe174Phe ; 522/1284 ; 522/1284 ; 174/427 ;	synonymous_variant ; sleL ; c.522C>T ; p.Phe174Phe ; 522/1284 ; 522/1284 ; 174/427 ;	upstream_gene_variant ; dck ; c.-1481C>T ; . ; . ; . ; . ;	upstream_gene_variant ; dgk ; c.-861C>T ; . ; . ; . ; . ;	upstream_gene_variant ; tadA ; c.-1222G>A ; . ; . ; . ; . ;	upstream_gene_variant ; scr ; n.-1749G>A ; . ; . ; . ; . ;
NC_000964.3	24768	A	C	225	hom	187	187	sleL	gene-BSU_00160	23868	25151	-	synonymous_variant ; sleL ; c.384T>G ; p.Thr128Thr ; 384/1284 ; 384/1284 ; 128/427 ;	synonymous_variant ; sleL ; c.384T>G ; p.Thr128Thr ; 384/1284 ; 384/1284 ; 128/427 ;	upstream_gene_variant ; dck ; c.-1619T>G ; . ; . ; . ; . ;	upstream_gene_variant ; dgk ; c.-999T>G ; . ; . ; . ; . ;	upstream_gene_variant ; tadA ; c.-1084A>C ; . ; . ; . ; . ;	upstream_gene_variant ; scr ; n.-1611A>C ; . ; . ; . ; . ;
NC_000964.3	24780	C	T	228	hom	185	184	sleL	gene-BSU_00160	23868	25151	-	synonymous_variant ; sleL ; c.372G>A ; p.Ser124Ser ; 372/1284 ; 372/1284 ; 124/427 ;	synonymous_variant ; sleL ; c.372G>A ; p.Ser124Ser ; 372/1284 ; 372/1284 ; 124/427 ;	upstream_gene_variant ; dck ; c.-1631G>A ; . ; . ; . ; . ;	upstream_gene_variant ; dgk ; c.-1011G>A ; . ; . ; . ; . ;	upstream_gene_variant ; tadA ; c.-1072C>T ; . ; . ; . ; . ;	upstream_gene_variant ; scr ; n.-1599C>T ; . ; . ; . ; . ;
NC_000964.3	25017	A	G	225	hom	211	211	sleL	gene-BSU_00160	23868	25151	-	synonymous_variant ; sleL ; c.135T>C ; p.Ala45Ala ; 135/1284 ; 135/1284 ; 45/427 ;	synonymous_variant ; sleL ; c.135T>C ; p.Ala45Ala ; 135/1284 ; 135/1284 ; 45/427 ;	upstream_gene_variant ; dck ; c.-1868T>C ; . ; . ; . ; . ;	upstream_gene_variant ; dgk ; c.-1248T>C ; . ; . ; . ; . ;	upstream_gene_variant ; tadA ; c.-835A>G ; . ; . ; . ; . ;	upstream_gene_variant ; scr ; n.-1362A>G ; . ; . ; . ; . ;
NC_000964.3	25089	G	C	225	hom	181	181	sleL	gene-BSU_00160	23868	25151	-	missense_variant ; sleL ; c.63C>G ; p.Asp21Glu ; 63/1284 ; 63/1284 ; 21/427 ;	missense_variant ; sleL ; c.63C>G ; p.Asp21Glu ; 63/1284 ; 63/1284 ; 21/427 ;	upstream_gene_variant ; dck ; c.-1940C>G ; . ; . ; . ; . ;	upstream_gene_variant ; dgk ; c.-1320C>G ; . ; . ; . ; . ;	upstream_gene_variant ; tadA ; c.-763G>C ; . ; . ; . ; . ;	upstream_gene_variant ; scr ; n.-1290G>C ; . ; . ; . ; . ;
NC_000964.3	25093	T	C	225	hom	171	171	sleL	gene-BSU_00160	23868	25151	-	missense_variant ; sleL ; c.59A>G ; p.Asn20Ser ; 59/1284 ; 59/1284 ; 20/427 ;	missense_variant ; sleL ; c.59A>G ; p.Asn20Ser ; 59/1284 ; 59/1284 ; 20/427 ;	upstream_gene_variant ; dck ; c.-1944A>G ; . ; . ; . ; . ;	upstream_gene_variant ; dgk ; c.-1324A>G ; . ; . ; . ; . ;	upstream_gene_variant ; tadA ; c.-759T>C ; . ; . ; . ; . ;	upstream_gene_variant ; scr ; n.-1286T>C ; . ; . ; . ; . ;
NC_000964.3	25096	G	A	225	hom	170	170	sleL	gene-BSU_00160	23868	25151	-	missense_variant ; sleL ; c.56C>T ; p.Thr19Ile ; 56/1284 ; 56/1284 ; 19/427 ;	missense_variant ; sleL ; c.56C>T ; p.Thr19Ile ; 56/1284 ; 56/1284 ; 19/427 ;	upstream_gene_variant ; dck ; c.-1947C>T ; . ; . ; . ; . ;	upstream_gene_variant ; dgk ; c.-1327C>T ; . ; . ; . ; . ;	upstream_gene_variant ; tadA ; c.-756G>A ; . ; . ; . ; . ;	upstream_gene_variant ; scr ; n.-1283G>A ; . ; . ; . ; . ;
NC_000964.3	25097	T	C	225	hom	171	171	sleL	gene-BSU_00160	23868	25151	-	missense_variant ; sleL ; c.55A>G ; p.Thr19Ala ; 55/1284 ; 55/1284 ; 19/427 ;	missense_variant ; sleL ; c.55A>G ; p.Thr19Ala ; 55/1284 ; 55/1284 ; 19/427 ;	upstream_gene_variant ; dck ; c.-1948A>G ; . ; . ; . ; . ;	upstream_gene_variant ; dgk ; c.-1328A>G ; . ; . ; . ; . ;	upstream_gene_variant ; tadA ; c.-755T>C ; . ; . ; . ; . ;	upstream_gene_variant ; scr ; n.-1282T>C ; . ; . ; . ; . ;
NC_000964.3	25187	C	A	225	hom	152	152	.	.	.	.	.	.	upstream_gene_variant ; dck ; c.-2038G>T ; . ; . ; . ; . ;	upstream_gene_variant ; dgk ; c.-1418G>T ; . ; . ; . ; . ;	upstream_gene_variant ; sleL ; c.-36G>T ; . ; . ; . ; . ;	upstream_gene_variant ; tadA ; c.-665C>A ; . ; . ; . ; . ;	upstream_gene_variant ; scr ; n.-1192C>A ; . ; . ; . ; . ;
NC_000964.3	25231	A	G	228	hom	138	137	yaaI	gene-BSU_00170	25221	25766	-	missense_variant ; yaaI ; c.536T>C ; p.Ile179Thr ; 536/546 ; 536/546 ; 179/181 ;	missense_variant ; yaaI ; c.536T>C ; p.Ile179Thr ; 536/546 ; 536/546 ; 179/181 ;	upstream_gene_variant ; dck ; c.-2082T>C ; . ; . ; . ; . ;	upstream_gene_variant ; dgk ; c.-1462T>C ; . ; . ; . ; . ;	upstream_gene_variant ; sleL ; c.-80T>C ; . ; . ; . ; . ;	upstream_gene_variant ; tadA ; c.-621A>G ; . ; . ; . ; . ;
NC_000964.3	25281	G	A	225	hom	161	161	yaaI	gene-BSU_00170	25221	25766	-	synonymous_variant ; yaaI ; c.486C>T ; p.Thr162Thr ; 486/546 ; 486/546 ; 162/181 ;	synonymous_variant ; yaaI ; c.486C>T ; p.Thr162Thr ; 486/546 ; 486/546 ; 162/181 ;	upstream_gene_variant ; dck ; c.-2132C>T ; . ; . ; . ; . ;	upstream_gene_variant ; dgk ; c.-1512C>T ; . ; . ; . ; . ;	upstream_gene_variant ; sleL ; c.-130C>T ; . ; . ; . ; . ;	upstream_gene_variant ; tadA ; c.-571G>A ; . ; . ; . ; . ;
NC_000964.3	25386	G	A	225	hom	173	173	yaaI	gene-BSU_00170	25221	25766	-	synonymous_variant ; yaaI ; c.381C>T ; p.Cys127Cys ; 381/546 ; 381/546 ; 127/181 ;	synonymous_variant ; yaaI ; c.381C>T ; p.Cys127Cys ; 381/546 ; 381/546 ; 127/181 ;	upstream_gene_variant ; dck ; c.-2237C>T ; . ; . ; . ; . ;	upstream_gene_variant ; dgk ; c.-1617C>T ; . ; . ; . ; . ;	upstream_gene_variant ; sleL ; c.-235C>T ; . ; . ; . ; . ;	upstream_gene_variant ; tadA ; c.-466G>A ; . ; . ; . ; . ;
NC_000964.3	25412	T	A	225	hom	176	176	yaaI	gene-BSU_00170	25221	25766	-	missense_variant ; yaaI ; c.355A>T ; p.Ile119Leu ; 355/546 ; 355/546 ; 119/181 ;	missense_variant ; yaaI ; c.355A>T ; p.Ile119Leu ; 355/546 ; 355/546 ; 119/181 ;	upstream_gene_variant ; dck ; c.-2263A>T ; . ; . ; . ; . ;	upstream_gene_variant ; dgk ; c.-1643A>T ; . ; . ; . ; . ;	upstream_gene_variant ; sleL ; c.-261A>T ; . ; . ; . ; . ;	upstream_gene_variant ; tadA ; c.-440T>A ; . ; . ; . ; . ;
NC_000964.3	25458	T	A	225	hom	155	155	yaaI	gene-BSU_00170	25221	25766	-	synonymous_variant ; yaaI ; c.309A>T ; p.Thr103Thr ; 309/546 ; 309/546 ; 103/181 ;	synonymous_variant ; yaaI ; c.309A>T ; p.Thr103Thr ; 309/546 ; 309/546 ; 103/181 ;	upstream_gene_variant ; dck ; c.-2309A>T ; . ; . ; . ; . ;	upstream_gene_variant ; dgk ; c.-1689A>T ; . ; . ; . ; . ;	upstream_gene_variant ; sleL ; c.-307A>T ; . ; . ; . ; . ;	upstream_gene_variant ; tadA ; c.-394T>A ; . ; . ; . ; . ;
NC_000964.3	25482	C	T	225	hom	144	144	yaaI	gene-BSU_00170	25221	25766	-	synonymous_variant ; yaaI ; c.285G>A ; p.Pro95Pro ; 285/546 ; 285/546 ; 95/181 ;	synonymous_variant ; yaaI ; c.285G>A ; p.Pro95Pro ; 285/546 ; 285/546 ; 95/181 ;	upstream_gene_variant ; dck ; c.-2333G>A ; . ; . ; . ; . ;	upstream_gene_variant ; dgk ; c.-1713G>A ; . ; . ; . ; . ;	upstream_gene_variant ; sleL ; c.-331G>A ; . ; . ; . ; . ;	upstream_gene_variant ; tadA ; c.-370C>T ; . ; . ; . ; . ;
NC_000964.3	25510	A	T	228	hom	137	136	yaaI	gene-BSU_00170	25221	25766	-	missense_variant ; yaaI ; c.257T>A ; p.Val86Glu ; 257/546 ; 257/546 ; 86/181 ;	missense_variant ; yaaI ; c.257T>A ; p.Val86Glu ; 257/546 ; 257/546 ; 86/181 ;	upstream_gene_variant ; dck ; c.-2361T>A ; . ; . ; . ; . ;	upstream_gene_variant ; dgk ; c.-1741T>A ; . ; . ; . ; . ;	upstream_gene_variant ; sleL ; c.-359T>A ; . ; . ; . ; . ;	upstream_gene_variant ; tadA ; c.-342A>T ; . ; . ; . ; . ;
NC_000964.3	25515	A	G	225	hom	139	139	yaaI	gene-BSU_00170	25221	25766	-	synonymous_variant ; yaaI ; c.252T>C ; p.Ala84Ala ; 252/546 ; 252/546 ; 84/181 ;	synonymous_variant ; yaaI ; c.252T>C ; p.Ala84Ala ; 252/546 ; 252/546 ; 84/181 ;	upstream_gene_variant ; dck ; c.-2366T>C ; . ; . ; . ; . ;	upstream_gene_variant ; dgk ; c.-1746T>C ; . ; . ; . ; . ;	upstream_gene_variant ; sleL ; c.-364T>C ; . ; . ; . ; . ;	upstream_gene_variant ; tadA ; c.-337A>G ; . ; . ; . ; . ;
NC_000964.3	25566	T	A	225	hom	123	123	yaaI	gene-BSU_00170	25221	25766	-	synonymous_variant ; yaaI ; c.201A>T ; p.Ile67Ile ; 201/546 ; 201/546 ; 67/181 ;	synonymous_variant ; yaaI ; c.201A>T ; p.Ile67Ile ; 201/546 ; 201/546 ; 67/181 ;	upstream_gene_variant ; dck ; c.-2417A>T ; . ; . ; . ; . ;	upstream_gene_variant ; dgk ; c.-1797A>T ; . ; . ; . ; . ;	upstream_gene_variant ; sleL ; c.-415A>T ; . ; . ; . ; . ;	upstream_gene_variant ; tadA ; c.-286T>A ; . ; . ; . ; . ;
NC_000964.3	25701	C	T	225	hom	87	87	yaaI	gene-BSU_00170	25221	25766	-	synonymous_variant ; yaaI ; c.66G>A ; p.Gly22Gly ; 66/546 ; 66/546 ; 22/181 ;	synonymous_variant ; yaaI ; c.66G>A ; p.Gly22Gly ; 66/546 ; 66/546 ; 22/181 ;	upstream_gene_variant ; dck ; c.-2552G>A ; . ; . ; . ; . ;	upstream_gene_variant ; dgk ; c.-1932G>A ; . ; . ; . ; . ;	upstream_gene_variant ; sleL ; c.-550G>A ; . ; . ; . ; . ;	upstream_gene_variant ; tadA ; c.-151C>T ; . ; . ; . ; . ;
NC_000964.3	25750	T	G	225	hom	84	84	yaaI	gene-BSU_00170	25221	25766	-	missense_variant ; yaaI ; c.17A>C ; p.Lys6Thr ; 17/546 ; 17/546 ; 6/181 ;	missense_variant ; yaaI ; c.17A>C ; p.Lys6Thr ; 17/546 ; 17/546 ; 6/181 ;	upstream_gene_variant ; dck ; c.-2601A>C ; . ; . ; . ; . ;	upstream_gene_variant ; dgk ; c.-1981A>C ; . ; . ; . ; . ;	upstream_gene_variant ; sleL ; c.-599A>C ; . ; . ; . ; . ;	upstream_gene_variant ; tadA ; c.-102T>G ; . ; . ; . ; . ;
NC_000964.3	25945	A	G	225	hom	203	203	tadA	gene-BSU_00180	25852	26337	+	missense_variant ; tadA ; c.94A>G ; p.Ile32Val ; 94/486 ; 94/486 ; 32/161 ;	missense_variant ; tadA ; c.94A>G ; p.Ile32Val ; 94/486 ; 94/486 ; 32/161 ;	upstream_gene_variant ; dck ; c.-2796T>C ; . ; . ; . ; . ;	upstream_gene_variant ; dgk ; c.-2176T>C ; . ; . ; . ; . ;	upstream_gene_variant ; sleL ; c.-794T>C ; . ; . ; . ; . ;	upstream_gene_variant ; yaaI ; c.-179T>C ; . ; . ; . ; . ;
NC_000964.3	25952	G	A	225	hom	212	212	tadA	gene-BSU_00180	25852	26337	+	missense_variant ; tadA ; c.101G>A ; p.Gly34Asp ; 101/486 ; 101/486 ; 34/161 ;	missense_variant ; tadA ; c.101G>A ; p.Gly34Asp ; 101/486 ; 101/486 ; 34/161 ;	upstream_gene_variant ; dck ; c.-2803C>T ; . ; . ; . ; . ;	upstream_gene_variant ; dgk ; c.-2183C>T ; . ; . ; . ; . ;	upstream_gene_variant ; sleL ; c.-801C>T ; . ; . ; . ; . ;	upstream_gene_variant ; yaaI ; c.-186C>T ; . ; . ; . ; . ;
NC_000964.3	25971	G	A	225	hom	217	217	tadA	gene-BSU_00180	25852	26337	+	synonymous_variant ; tadA ; c.120G>A ; p.Ala40Ala ; 120/486 ; 120/486 ; 40/161 ;	synonymous_variant ; tadA ; c.120G>A ; p.Ala40Ala ; 120/486 ; 120/486 ; 40/161 ;	upstream_gene_variant ; dck ; c.-2822C>T ; . ; . ; . ; . ;	upstream_gene_variant ; dgk ; c.-2202C>T ; . ; . ; . ; . ;	upstream_gene_variant ; sleL ; c.-820C>T ; . ; . ; . ; . ;	upstream_gene_variant ; yaaI ; c.-205C>T ; . ; . ; . ; . ;
NC_000964.3	25992	A	G	225	hom	223	223	tadA	gene-BSU_00180	25852	26337	+	synonymous_variant ; tadA ; c.141A>G ; p.Glu47Glu ; 141/486 ; 141/486 ; 47/161 ;	synonymous_variant ; tadA ; c.141A>G ; p.Glu47Glu ; 141/486 ; 141/486 ; 47/161 ;	upstream_gene_variant ; dck ; c.-2843T>C ; . ; . ; . ; . ;	upstream_gene_variant ; dgk ; c.-2223T>C ; . ; . ; . ; . ;	upstream_gene_variant ; sleL ; c.-841T>C ; . ; . ; . ; . ;	upstream_gene_variant ; yaaI ; c.-226T>C ; . ; . ; . ; . ;
NC_000964.3	25995	G	A	225	hom	223	223	tadA	gene-BSU_00180	25852	26337	+	synonymous_variant ; tadA ; c.144G>A ; p.Gln48Gln ; 144/486 ; 144/486 ; 48/161 ;	synonymous_variant ; tadA ; c.144G>A ; p.Gln48Gln ; 144/486 ; 144/486 ; 48/161 ;	upstream_gene_variant ; dck ; c.-2846C>T ; . ; . ; . ; . ;	upstream_gene_variant ; dgk ; c.-2226C>T ; . ; . ; . ; . ;	upstream_gene_variant ; sleL ; c.-844C>T ; . ; . ; . ; . ;	upstream_gene_variant ; yaaI ; c.-229C>T ; . ; . ; . ; . ;
NC_000964.3	26025	A	G	225	hom	234	234	tadA	gene-BSU_00180	25852	26337	+	synonymous_variant ; tadA ; c.174A>G ; p.Val58Val ; 174/486 ; 174/486 ; 58/161 ;	synonymous_variant ; tadA ; c.174A>G ; p.Val58Val ; 174/486 ; 174/486 ; 58/161 ;	upstream_gene_variant ; dck ; c.-2876T>C ; . ; . ; . ; . ;	upstream_gene_variant ; dgk ; c.-2256T>C ; . ; . ; . ; . ;	upstream_gene_variant ; sleL ; c.-874T>C ; . ; . ; . ; . ;	upstream_gene_variant ; yaaI ; c.-259T>C ; . ; . ; . ; . ;
NC_000964.3	26049	C	G	225	hom	234	234	tadA	gene-BSU_00180	25852	26337	+	synonymous_variant ; tadA ; c.198C>G ; p.Leu66Leu ; 198/486 ; 198/486 ; 66/161 ;	synonymous_variant ; tadA ; c.198C>G ; p.Leu66Leu ; 198/486 ; 198/486 ; 66/161 ;	upstream_gene_variant ; dck ; c.-2900G>C ; . ; . ; . ; . ;	upstream_gene_variant ; dgk ; c.-2280G>C ; . ; . ; . ; . ;	upstream_gene_variant ; sleL ; c.-898G>C ; . ; . ; . ; . ;	upstream_gene_variant ; yaaI ; c.-283G>C ; . ; . ; . ; . ;
NC_000964.3	26062	C	T	225	hom	228	228	tadA	gene-BSU_00180	25852	26337	+	synonymous_variant ; tadA ; c.211C>T ; p.Leu71Leu ; 211/486 ; 211/486 ; 71/161 ;	synonymous_variant ; tadA ; c.211C>T ; p.Leu71Leu ; 211/486 ; 211/486 ; 71/161 ;	upstream_gene_variant ; dck ; c.-2913G>A ; . ; . ; . ; . ;	upstream_gene_variant ; dgk ; c.-2293G>A ; . ; . ; . ; . ;	upstream_gene_variant ; sleL ; c.-911G>A ; . ; . ; . ; . ;	upstream_gene_variant ; yaaI ; c.-296G>A ; . ; . ; . ; . ;
NC_000964.3	26247	G	A	225	hom	109	109	tadA	gene-BSU_00180	25852	26337	+	synonymous_variant ; tadA ; c.396G>A ; p.Val132Val ; 396/486 ; 396/486 ; 132/161 ;	synonymous_variant ; tadA ; c.396G>A ; p.Val132Val ; 396/486 ; 396/486 ; 132/161 ;	upstream_gene_variant ; dck ; c.-3098C>T ; . ; . ; . ; . ;	upstream_gene_variant ; dgk ; c.-2478C>T ; . ; . ; . ; . ;	upstream_gene_variant ; sleL ; c.-1096C>T ; . ; . ; . ; . ;	upstream_gene_variant ; yaaI ; c.-481C>T ; . ; . ; . ; . ;
NC_000964.3	26718	T	C	225	hom	157	157	scr	gene-BSU_misc_RNA_2	26379	26732	+	non_coding_transcript_exon_variant ; scr ; n.340T>C ; . ; . ; . ; . ;	upstream_gene_variant ; dck ; c.-3569A>G ; . ; . ; . ; . ;	upstream_gene_variant ; dgk ; c.-2949A>G ; . ; . ; . ; . ;	upstream_gene_variant ; sleL ; c.-1567A>G ; . ; . ; . ; . ;	upstream_gene_variant ; yaaI ; c.-952A>G ; . ; . ; . ; . ;	upstream_gene_variant ; dnaX ; c.-96T>C ; . ; . ; . ; . ;
NC_000964.3	26951	T	A	225	hom	212	212	dnaX	gene-BSU_00190	26814	28505	+	synonymous_variant ; dnaX ; c.138T>A ; p.Pro46Pro ; 138/1692 ; 138/1692 ; 46/563 ;	synonymous_variant ; dnaX ; c.138T>A ; p.Pro46Pro ; 138/1692 ; 138/1692 ; 46/563 ;	upstream_gene_variant ; dck ; c.-3802A>T ; . ; . ; . ; . ;	upstream_gene_variant ; dgk ; c.-3182A>T ; . ; . ; . ; . ;	upstream_gene_variant ; sleL ; c.-1800A>T ; . ; . ; . ; . ;	upstream_gene_variant ; yaaI ; c.-1185A>T ; . ; . ; . ; . ;
NC_000964.3	27266	T	C	225	hom	184	184	dnaX	gene-BSU_00190	26814	28505	+	synonymous_variant ; dnaX ; c.453T>C ; p.Ile151Ile ; 453/1692 ; 453/1692 ; 151/563 ;	synonymous_variant ; dnaX ; c.453T>C ; p.Ile151Ile ; 453/1692 ; 453/1692 ; 151/563 ;	upstream_gene_variant ; dck ; c.-4117A>G ; . ; . ; . ; . ;	upstream_gene_variant ; dgk ; c.-3497A>G ; . ; . ; . ; . ;	upstream_gene_variant ; sleL ; c.-2115A>G ; . ; . ; . ; . ;	upstream_gene_variant ; yaaI ; c.-1500A>G ; . ; . ; . ; . ;
NC_000964.3	27425	A	T	225	hom	202	202	dnaX	gene-BSU_00190	26814	28505	+	missense_variant ; dnaX ; c.612A>T ; p.Glu204Asp ; 612/1692 ; 612/1692 ; 204/563 ;	missense_variant ; dnaX ; c.612A>T ; p.Glu204Asp ; 612/1692 ; 612/1692 ; 204/563 ;	upstream_gene_variant ; dck ; c.-4276T>A ; . ; . ; . ; . ;	upstream_gene_variant ; dgk ; c.-3656T>A ; . ; . ; . ; . ;	upstream_gene_variant ; sleL ; c.-2274T>A ; . ; . ; . ; . ;	upstream_gene_variant ; yaaI ; c.-1659T>A ; . ; . ; . ; . ;
NC_000964.3	27573	A	C	225	hom	170	170	dnaX	gene-BSU_00190	26814	28505	+	missense_variant ; dnaX ; c.760A>C ; p.Lys254Gln ; 760/1692 ; 760/1692 ; 254/563 ;	missense_variant ; dnaX ; c.760A>C ; p.Lys254Gln ; 760/1692 ; 760/1692 ; 254/563 ;	upstream_gene_variant ; dck ; c.-4424T>G ; . ; . ; . ; . ;	upstream_gene_variant ; dgk ; c.-3804T>G ; . ; . ; . ; . ;	upstream_gene_variant ; sleL ; c.-2422T>G ; . ; . ; . ; . ;	upstream_gene_variant ; yaaI ; c.-1807T>G ; . ; . ; . ; . ;
NC_000964.3	28307	G	A	225	hom	233	233	dnaX	gene-BSU_00190	26814	28505	+	synonymous_variant ; dnaX ; c.1494G>A ; p.Glu498Glu ; 1494/1692 ; 1494/1692 ; 498/563 ;	synonymous_variant ; dnaX ; c.1494G>A ; p.Glu498Glu ; 1494/1692 ; 1494/1692 ; 498/563 ;	upstream_gene_variant ; dgk ; c.-4538C>T ; . ; . ; . ; . ;	upstream_gene_variant ; sleL ; c.-3156C>T ; . ; . ; . ; . ;	upstream_gene_variant ; yaaI ; c.-2541C>T ; . ; . ; . ; . ;	upstream_gene_variant ; ebfC ; c.-222G>A ; . ; . ; . ; . ;
NC_000964.3	28429	A	T	225	hom	419	419	dnaX	gene-BSU_00190	26814	28505	+	missense_variant ; dnaX ; c.1616A>T ; p.Glu539Val ; 1616/1692 ; 1616/1692 ; 539/563 ;	missense_variant ; dnaX ; c.1616A>T ; p.Glu539Val ; 1616/1692 ; 1616/1692 ; 539/563 ;	upstream_gene_variant ; dgk ; c.-4660T>A ; . ; . ; . ; . ;	upstream_gene_variant ; sleL ; c.-3278T>A ; . ; . ; . ; . ;	upstream_gene_variant ; yaaI ; c.-2663T>A ; . ; . ; . ; . ;	upstream_gene_variant ; ebfC ; c.-100A>T ; . ; . ; . ; . ;
NC_000964.3	28801	C	T	225	hom	339	339	ebfC	gene-BSU_00200	28529	28852	+	synonymous_variant ; ebfC ; c.273C>T ; p.Asn91Asn ; 273/324 ; 273/324 ; 91/107 ;	synonymous_variant ; ebfC ; c.273C>T ; p.Asn91Asn ; 273/324 ; 273/324 ; 91/107 ;	upstream_gene_variant ; sleL ; c.-3650G>A ; . ; . ; . ; . ;	upstream_gene_variant ; yaaI ; c.-3035G>A ; . ; . ; . ; . ;	upstream_gene_variant ; recR ; c.-66C>T ; . ; . ; . ; . ;	upstream_gene_variant ; yaaL ; c.-680C>T ; . ; . ; . ; . ;
NC_000964.3	29840	A	T	225	hom	163	163	bofA	gene-BSU_00230	29772	30035	+	synonymous_variant ; bofA ; c.69A>T ; p.Ala23Ala ; 69/264 ; 69/264 ; 23/87 ;	synonymous_variant ; bofA ; c.69A>T ; p.Ala23Ala ; 69/264 ; 69/264 ; 23/87 ;	upstream_gene_variant ; sleL ; c.-4689T>A ; . ; . ; . ; . ;	upstream_gene_variant ; yaaI ; c.-4074T>A ; . ; . ; . ; . ;	upstream_gene_variant ; rrnA-16S ; n.-439A>T ; . ; . ; . ; . ;	upstream_gene_variant ; trnA-Ile ; c.-2092A>T ; . ; . ; . ; . ;
NC_000964.3	30235	A	AG	93	hom	222	143	.	.	.	.	.	.	upstream_gene_variant ; yaaI ; c.-4470_-4469insC ; . ; . ; . ; . ;	upstream_gene_variant ; rrnA-16S ; n.-44_-43insG ; . ; . ; . ; . ;	upstream_gene_variant ; trnA-Ile ; c.-1697_-1696insG ; . ; . ; . ; . ;	upstream_gene_variant ; trnA-Ala ; c.-1785_-1784insG ; . ; . ; . ; . ;	upstream_gene_variant ; rrnA-23S ; n.-1942_-1941insG ; . ; . ; . ; . ;
NC_000964.3	30242	T	A	222	het	235	135	.	.	.	.	.	.	upstream_gene_variant ; yaaI ; c.-4476A>T ; . ; . ; . ; . ;	upstream_gene_variant ; rrnA-16S ; n.-37T>A ; . ; . ; . ; . ;	upstream_gene_variant ; trnA-Ile ; c.-1690T>A ; . ; . ; . ; . ;	upstream_gene_variant ; trnA-Ala ; c.-1778T>A ; . ; . ; . ; . ;	upstream_gene_variant ; rrnA-23S ; n.-1935T>A ; . ; . ; . ; . ;
NC_000964.3	30255	A	G	222	het	262	136	.	.	.	.	.	.	upstream_gene_variant ; yaaI ; c.-4489T>C ; . ; . ; . ; . ;	upstream_gene_variant ; rrnA-16S ; n.-24A>G ; . ; . ; . ; . ;	upstream_gene_variant ; trnA-Ile ; c.-1677A>G ; . ; . ; . ; . ;	upstream_gene_variant ; trnA-Ala ; c.-1765A>G ; . ; . ; . ; . ;	upstream_gene_variant ; rrnA-23S ; n.-1922A>G ; . ; . ; . ; . ;
NC_000964.3	34740	A	G	68	hom	6	6	rrnA-23S	gene-BSU_rRNA_5	32177	35103	+	non_coding_transcript_exon_variant ; rrnA-23S ; n.2564A>G ; . ; . ; . ; . ;	upstream_gene_variant ; rrnA-5S ; n.-497A>G ; . ; . ; . ; . ;	upstream_gene_variant ; csfB ; c.-791A>G ; . ; . ; . ; . ;	upstream_gene_variant ; xpaC ; c.-1105A>G ; . ; . ; . ; . ;	upstream_gene_variant ; yaaN ; c.-1738A>G ; . ; . ; . ; . ;	upstream_gene_variant ; yaaO ; c.-2980A>G ; . ; . ; . ; . ;
NC_000964.3	35001	C	T	228	hom	383	183	rrnA-23S	gene-BSU_rRNA_5	32177	35103	+	non_coding_transcript_exon_variant ; rrnA-23S ; n.2825C>T ; . ; . ; . ; . ;	upstream_gene_variant ; rrnA-5S ; n.-236C>T ; . ; . ; . ; . ;	upstream_gene_variant ; csfB ; c.-530C>T ; . ; . ; . ; . ;	upstream_gene_variant ; xpaC ; c.-844C>T ; . ; . ; . ; . ;	upstream_gene_variant ; yaaN ; c.-1477C>T ; . ; . ; . ; . ;	upstream_gene_variant ; yaaO ; c.-2719C>T ; . ; . ; . ; . ;
NC_000964.3	35369	T	C	225	hom	65	65	.	.	.	.	.	.	upstream_gene_variant ; csfB ; c.-162T>C ; . ; . ; . ; . ;	upstream_gene_variant ; xpaC ; c.-476T>C ; . ; . ; . ; . ;	upstream_gene_variant ; yaaN ; c.-1109T>C ; . ; . ; . ; . ;	upstream_gene_variant ; yaaO ; c.-2351T>C ; . ; . ; . ; . ;	upstream_gene_variant ; tmk ; c.-3790T>C ; . ; . ; . ; . ;
NC_000964.3	35371	A	T	225	hom	65	65	.	.	.	.	.	.	upstream_gene_variant ; csfB ; c.-160A>T ; . ; . ; . ; . ;	upstream_gene_variant ; xpaC ; c.-474A>T ; . ; . ; . ; . ;	upstream_gene_variant ; yaaN ; c.-1107A>T ; . ; . ; . ; . ;	upstream_gene_variant ; yaaO ; c.-2349A>T ; . ; . ; . ; . ;	upstream_gene_variant ; tmk ; c.-3788A>T ; . ; . ; . ; . ;
NC_000964.3	35438	T	C	225	hom	109	109	.	.	.	.	.	.	upstream_gene_variant ; csfB ; c.-93T>C ; . ; . ; . ; . ;	upstream_gene_variant ; xpaC ; c.-407T>C ; . ; . ; . ; . ;	upstream_gene_variant ; yaaN ; c.-1040T>C ; . ; . ; . ; . ;	upstream_gene_variant ; yaaO ; c.-2282T>C ; . ; . ; . ; . ;	upstream_gene_variant ; tmk ; c.-3721T>C ; . ; . ; . ; . ;
NC_000964.3	35456	A	C	225	hom	114	114	.	.	.	.	.	.	upstream_gene_variant ; csfB ; c.-75A>C ; . ; . ; . ; . ;	upstream_gene_variant ; xpaC ; c.-389A>C ; . ; . ; . ; . ;	upstream_gene_variant ; yaaN ; c.-1022A>C ; . ; . ; . ; . ;	upstream_gene_variant ; yaaO ; c.-2264A>C ; . ; . ; . ; . ;	upstream_gene_variant ; tmk ; c.-3703A>C ; . ; . ; . ; . ;
NC_000964.3	35464	A	G	225	hom	111	111	.	.	.	.	.	.	upstream_gene_variant ; csfB ; c.-67A>G ; . ; . ; . ; . ;	upstream_gene_variant ; xpaC ; c.-381A>G ; . ; . ; . ; . ;	upstream_gene_variant ; yaaN ; c.-1014A>G ; . ; . ; . ; . ;	upstream_gene_variant ; yaaO ; c.-2256A>G ; . ; . ; . ; . ;	upstream_gene_variant ; tmk ; c.-3695A>G ; . ; . ; . ; . ;
NC_000964.3	35470	G	A	225	hom	115	115	.	.	.	.	.	.	upstream_gene_variant ; csfB ; c.-61G>A ; . ; . ; . ; . ;	upstream_gene_variant ; xpaC ; c.-375G>A ; . ; . ; . ; . ;	upstream_gene_variant ; yaaN ; c.-1008G>A ; . ; . ; . ; . ;	upstream_gene_variant ; yaaO ; c.-2250G>A ; . ; . ; . ; . ;	upstream_gene_variant ; tmk ; c.-3689G>A ; . ; . ; . ; . ;
NC_000964.3	35512	C	T	225	hom	126	126	.	.	.	.	.	.	upstream_gene_variant ; csfB ; c.-19C>T ; . ; . ; . ; . ;	upstream_gene_variant ; xpaC ; c.-333C>T ; . ; . ; . ; . ;	upstream_gene_variant ; yaaN ; c.-966C>T ; . ; . ; . ; . ;	upstream_gene_variant ; yaaO ; c.-2208C>T ; . ; . ; . ; . ;	upstream_gene_variant ; tmk ; c.-3647C>T ; . ; . ; . ; . ;
NC_000964.3	35746	G	A	225	hom	61	61	.	.	.	.	.	.	upstream_gene_variant ; xpaC ; c.-99G>A ; . ; . ; . ; . ;	upstream_gene_variant ; yaaN ; c.-732G>A ; . ; . ; . ; . ;	upstream_gene_variant ; yaaO ; c.-1974G>A ; . ; . ; . ; . ;	upstream_gene_variant ; tmk ; c.-3413G>A ; . ; . ; . ; . ;	upstream_gene_variant ; darA ; c.-4125G>A ; . ; . ; . ; . ;
NC_000964.3	35860	C	T	225	hom	66	66	xpaC	gene-BSU_00250	35845	36459	+	missense_variant ; xpaC ; c.16C>T ; p.His6Tyr ; 16/615 ; 16/615 ; 6/204 ;	missense_variant ; xpaC ; c.16C>T ; p.His6Tyr ; 16/615 ; 16/615 ; 6/204 ;	upstream_gene_variant ; yaaN ; c.-618C>T ; . ; . ; . ; . ;	upstream_gene_variant ; yaaO ; c.-1860C>T ; . ; . ; . ; . ;	upstream_gene_variant ; tmk ; c.-3299C>T ; . ; . ; . ; . ;	upstream_gene_variant ; darA ; c.-4011C>T ; . ; . ; . ; . ;
NC_000964.3	35869	G	A	225	hom	69	69	xpaC	gene-BSU_00250	35845	36459	+	missense_variant ; xpaC ; c.25G>A ; p.Val9Met ; 25/615 ; 25/615 ; 9/204 ;	missense_variant ; xpaC ; c.25G>A ; p.Val9Met ; 25/615 ; 25/615 ; 9/204 ;	upstream_gene_variant ; yaaN ; c.-609G>A ; . ; . ; . ; . ;	upstream_gene_variant ; yaaO ; c.-1851G>A ; . ; . ; . ; . ;	upstream_gene_variant ; tmk ; c.-3290G>A ; . ; . ; . ; . ;	upstream_gene_variant ; darA ; c.-4002G>A ; . ; . ; . ; . ;
NC_000964.3	35941	A	C	225	hom	78	78	xpaC	gene-BSU_00250	35845	36459	+	missense_variant ; xpaC ; c.97A>C ; p.Ile33Leu ; 97/615 ; 97/615 ; 33/204 ;	missense_variant ; xpaC ; c.97A>C ; p.Ile33Leu ; 97/615 ; 97/615 ; 33/204 ;	upstream_gene_variant ; yaaN ; c.-537A>C ; . ; . ; . ; . ;	upstream_gene_variant ; yaaO ; c.-1779A>C ; . ; . ; . ; . ;	upstream_gene_variant ; tmk ; c.-3218A>C ; . ; . ; . ; . ;	upstream_gene_variant ; darA ; c.-3930A>C ; . ; . ; . ; . ;
NC_000964.3	36072	C	T	225	hom	75	75	xpaC	gene-BSU_00250	35845	36459	+	synonymous_variant ; xpaC ; c.228C>T ; p.Asn76Asn ; 228/615 ; 228/615 ; 76/204 ;	synonymous_variant ; xpaC ; c.228C>T ; p.Asn76Asn ; 228/615 ; 228/615 ; 76/204 ;	upstream_gene_variant ; yaaN ; c.-406C>T ; . ; . ; . ; . ;	upstream_gene_variant ; yaaO ; c.-1648C>T ; . ; . ; . ; . ;	upstream_gene_variant ; tmk ; c.-3087C>T ; . ; . ; . ; . ;	upstream_gene_variant ; darA ; c.-3799C>T ; . ; . ; . ; . ;
NC_000964.3	37017	C	T	225	hom	215	215	yaaN	gene-BSU_00260	36478	37638	+	synonymous_variant ; yaaN ; c.540C>T ; p.Phe180Phe ; 540/1161 ; 540/1161 ; 180/386 ;	synonymous_variant ; yaaN ; c.540C>T ; p.Phe180Phe ; 540/1161 ; 540/1161 ; 180/386 ;	upstream_gene_variant ; yaaO ; c.-703C>T ; . ; . ; . ; . ;	upstream_gene_variant ; tmk ; c.-2142C>T ; . ; . ; . ; . ;	upstream_gene_variant ; darA ; c.-2854C>T ; . ; . ; . ; . ;	upstream_gene_variant ; yaaR ; c.-3196C>T ; . ; . ; . ; . ;
NC_000964.3	37020	A	C	225	hom	211	211	yaaN	gene-BSU_00260	36478	37638	+	synonymous_variant ; yaaN ; c.543A>C ; p.Ala181Ala ; 543/1161 ; 543/1161 ; 181/386 ;	synonymous_variant ; yaaN ; c.543A>C ; p.Ala181Ala ; 543/1161 ; 543/1161 ; 181/386 ;	upstream_gene_variant ; yaaO ; c.-700A>C ; . ; . ; . ; . ;	upstream_gene_variant ; tmk ; c.-2139A>C ; . ; . ; . ; . ;	upstream_gene_variant ; darA ; c.-2851A>C ; . ; . ; . ; . ;	upstream_gene_variant ; yaaR ; c.-3193A>C ; . ; . ; . ; . ;
NC_000964.3	37059	G	T	225	hom	222	222	yaaN	gene-BSU_00260	36478	37638	+	synonymous_variant ; yaaN ; c.582G>T ; p.Leu194Leu ; 582/1161 ; 582/1161 ; 194/386 ;	synonymous_variant ; yaaN ; c.582G>T ; p.Leu194Leu ; 582/1161 ; 582/1161 ; 194/386 ;	upstream_gene_variant ; yaaO ; c.-661G>T ; . ; . ; . ; . ;	upstream_gene_variant ; tmk ; c.-2100G>T ; . ; . ; . ; . ;	upstream_gene_variant ; darA ; c.-2812G>T ; . ; . ; . ; . ;	upstream_gene_variant ; yaaR ; c.-3154G>T ; . ; . ; . ; . ;
NC_000964.3	37074	A	G	225	hom	204	204	yaaN	gene-BSU_00260	36478	37638	+	synonymous_variant ; yaaN ; c.597A>G ; p.Thr199Thr ; 597/1161 ; 597/1161 ; 199/386 ;	synonymous_variant ; yaaN ; c.597A>G ; p.Thr199Thr ; 597/1161 ; 597/1161 ; 199/386 ;	upstream_gene_variant ; yaaO ; c.-646A>G ; . ; . ; . ; . ;	upstream_gene_variant ; tmk ; c.-2085A>G ; . ; . ; . ; . ;	upstream_gene_variant ; darA ; c.-2797A>G ; . ; . ; . ; . ;	upstream_gene_variant ; yaaR ; c.-3139A>G ; . ; . ; . ; . ;
NC_000964.3	37080	G	A	225	hom	213	213	yaaN	gene-BSU_00260	36478	37638	+	synonymous_variant ; yaaN ; c.603G>A ; p.Thr201Thr ; 603/1161 ; 603/1161 ; 201/386 ;	synonymous_variant ; yaaN ; c.603G>A ; p.Thr201Thr ; 603/1161 ; 603/1161 ; 201/386 ;	upstream_gene_variant ; yaaO ; c.-640G>A ; . ; . ; . ; . ;	upstream_gene_variant ; tmk ; c.-2079G>A ; . ; . ; . ; . ;	upstream_gene_variant ; darA ; c.-2791G>A ; . ; . ; . ; . ;	upstream_gene_variant ; yaaR ; c.-3133G>A ; . ; . ; . ; . ;
NC_000964.3	37182	G	A	225	hom	172	172	yaaN	gene-BSU_00260	36478	37638	+	synonymous_variant ; yaaN ; c.705G>A ; p.Arg235Arg ; 705/1161 ; 705/1161 ; 235/386 ;	synonymous_variant ; yaaN ; c.705G>A ; p.Arg235Arg ; 705/1161 ; 705/1161 ; 235/386 ;	upstream_gene_variant ; yaaO ; c.-538G>A ; . ; . ; . ; . ;	upstream_gene_variant ; tmk ; c.-1977G>A ; . ; . ; . ; . ;	upstream_gene_variant ; darA ; c.-2689G>A ; . ; . ; . ; . ;	upstream_gene_variant ; yaaR ; c.-3031G>A ; . ; . ; . ; . ;
NC_000964.3	37185	G	T	228	hom	175	174	yaaN	gene-BSU_00260	36478	37638	+	synonymous_variant ; yaaN ; c.708G>T ; p.Val236Val ; 708/1161 ; 708/1161 ; 236/386 ;	synonymous_variant ; yaaN ; c.708G>T ; p.Val236Val ; 708/1161 ; 708/1161 ; 236/386 ;	upstream_gene_variant ; yaaO ; c.-535G>T ; . ; . ; . ; . ;	upstream_gene_variant ; tmk ; c.-1974G>T ; . ; . ; . ; . ;	upstream_gene_variant ; darA ; c.-2686G>T ; . ; . ; . ; . ;	upstream_gene_variant ; yaaR ; c.-3028G>T ; . ; . ; . ; . ;
NC_000964.3	37195	C	T	225	hom	185	185	yaaN	gene-BSU_00260	36478	37638	+	synonymous_variant ; yaaN ; c.718C>T ; p.Leu240Leu ; 718/1161 ; 718/1161 ; 240/386 ;	synonymous_variant ; yaaN ; c.718C>T ; p.Leu240Leu ; 718/1161 ; 718/1161 ; 240/386 ;	upstream_gene_variant ; yaaO ; c.-525C>T ; . ; . ; . ; . ;	upstream_gene_variant ; tmk ; c.-1964C>T ; . ; . ; . ; . ;	upstream_gene_variant ; darA ; c.-2676C>T ; . ; . ; . ; . ;	upstream_gene_variant ; yaaR ; c.-3018C>T ; . ; . ; . ; . ;
NC_000964.3	37218	C	T	225	hom	190	190	yaaN	gene-BSU_00260	36478	37638	+	synonymous_variant ; yaaN ; c.741C>T ; p.Ile247Ile ; 741/1161 ; 741/1161 ; 247/386 ;	synonymous_variant ; yaaN ; c.741C>T ; p.Ile247Ile ; 741/1161 ; 741/1161 ; 247/386 ;	upstream_gene_variant ; yaaO ; c.-502C>T ; . ; . ; . ; . ;	upstream_gene_variant ; tmk ; c.-1941C>T ; . ; . ; . ; . ;	upstream_gene_variant ; darA ; c.-2653C>T ; . ; . ; . ; . ;	upstream_gene_variant ; yaaR ; c.-2995C>T ; . ; . ; . ; . ;
NC_000964.3	37306	T	C	225	hom	200	200	yaaN	gene-BSU_00260	36478	37638	+	synonymous_variant ; yaaN ; c.829T>C ; p.Leu277Leu ; 829/1161 ; 829/1161 ; 277/386 ;	synonymous_variant ; yaaN ; c.829T>C ; p.Leu277Leu ; 829/1161 ; 829/1161 ; 277/386 ;	upstream_gene_variant ; yaaO ; c.-414T>C ; . ; . ; . ; . ;	upstream_gene_variant ; tmk ; c.-1853T>C ; . ; . ; . ; . ;	upstream_gene_variant ; darA ; c.-2565T>C ; . ; . ; . ; . ;	upstream_gene_variant ; yaaR ; c.-2907T>C ; . ; . ; . ; . ;
NC_000964.3	37371	G	A	225	hom	224	224	yaaN	gene-BSU_00260	36478	37638	+	synonymous_variant ; yaaN ; c.894G>A ; p.Gln298Gln ; 894/1161 ; 894/1161 ; 298/386 ;	synonymous_variant ; yaaN ; c.894G>A ; p.Gln298Gln ; 894/1161 ; 894/1161 ; 298/386 ;	upstream_gene_variant ; yaaO ; c.-349G>A ; . ; . ; . ; . ;	upstream_gene_variant ; tmk ; c.-1788G>A ; . ; . ; . ; . ;	upstream_gene_variant ; darA ; c.-2500G>A ; . ; . ; . ; . ;	upstream_gene_variant ; yaaR ; c.-2842G>A ; . ; . ; . ; . ;
NC_000964.3	37392	C	T	225	hom	237	237	yaaN	gene-BSU_00260	36478	37638	+	synonymous_variant ; yaaN ; c.915C>T ; p.Thr305Thr ; 915/1161 ; 915/1161 ; 305/386 ;	synonymous_variant ; yaaN ; c.915C>T ; p.Thr305Thr ; 915/1161 ; 915/1161 ; 305/386 ;	upstream_gene_variant ; yaaO ; c.-328C>T ; . ; . ; . ; . ;	upstream_gene_variant ; tmk ; c.-1767C>T ; . ; . ; . ; . ;	upstream_gene_variant ; darA ; c.-2479C>T ; . ; . ; . ; . ;	upstream_gene_variant ; yaaR ; c.-2821C>T ; . ; . ; . ; . ;
NC_000964.3	37419	G	C	225	hom	261	261	yaaN	gene-BSU_00260	36478	37638	+	missense_variant ; yaaN ; c.942G>C ; p.Glu314Asp ; 942/1161 ; 942/1161 ; 314/386 ;	missense_variant ; yaaN ; c.942G>C ; p.Glu314Asp ; 942/1161 ; 942/1161 ; 314/386 ;	upstream_gene_variant ; yaaO ; c.-301G>C ; . ; . ; . ; . ;	upstream_gene_variant ; tmk ; c.-1740G>C ; . ; . ; . ; . ;	upstream_gene_variant ; darA ; c.-2452G>C ; . ; . ; . ; . ;	upstream_gene_variant ; yaaR ; c.-2794G>C ; . ; . ; . ; . ;
NC_000964.3	37618	A	C	225	hom	289	289	yaaN	gene-BSU_00260	36478	37638	+	missense_variant ; yaaN ; c.1141A>C ; p.Ile381Leu ; 1141/1161 ; 1141/1161 ; 381/386 ;	missense_variant ; yaaN ; c.1141A>C ; p.Ile381Leu ; 1141/1161 ; 1141/1161 ; 381/386 ;	upstream_gene_variant ; yaaO ; c.-102A>C ; . ; . ; . ; . ;	upstream_gene_variant ; tmk ; c.-1541A>C ; . ; . ; . ; . ;	upstream_gene_variant ; darA ; c.-2253A>C ; . ; . ; . ; . ;	upstream_gene_variant ; yaaR ; c.-2595A>C ; . ; . ; . ; . ;
NC_000964.3	37625	TAAA	TAA	225	hom	90	90	yaaN	gene-BSU_00260	36478	37638	+	frameshift_variant ; yaaN ; c.1151delA ; p.Lys384fs ; 1151/1161 ; 1151/1161 ; 384/386 ;	frameshift_variant ; yaaN ; c.1151delA ; p.Lys384fs ; 1151/1161 ; 1151/1161 ; 384/386 ;	upstream_gene_variant ; yaaO ; c.-92delA ; . ; . ; . ; . ;	upstream_gene_variant ; tmk ; c.-1531delA ; . ; . ; . ; . ;	upstream_gene_variant ; darA ; c.-2243delA ; . ; . ; . ; . ;	upstream_gene_variant ; yaaR ; c.-2585delA ; . ; . ; . ; . ;
NC_000964.3	37637	G	A	225	hom	258	258	yaaN	gene-BSU_00260	36478	37638	+	splice_region_variant&stop_retained_variant ; yaaN ; c.1160G>A ; p.Ter387Ter ; 1160/1161 ; 1160/1161 ; 387/386 ;	splice_region_variant&stop_retained_variant ; yaaN ; c.1160G>A ; p.Ter387Ter ; 1160/1161 ; 1160/1161 ; 387/386 ;	upstream_gene_variant ; yaaO ; c.-83G>A ; . ; . ; . ; . ;	upstream_gene_variant ; tmk ; c.-1522G>A ; . ; . ; . ; . ;	upstream_gene_variant ; darA ; c.-2234G>A ; . ; . ; . ; . ;	upstream_gene_variant ; yaaR ; c.-2576G>A ; . ; . ; . ; . ;
NC_000964.3	37638	A	G	225	hom	258	258	yaaN	gene-BSU_00260	36478	37638	+	stop_lost&splice_region_variant ; yaaN ; c.1161A>G ; p.Ter387Trpext*? ; 1161/1161 ; 1161/1161 ; 387/386 ;	stop_lost&splice_region_variant ; yaaN ; c.1161A>G ; p.Ter387Trpext*? ; 1161/1161 ; 1161/1161 ; 387/386 ;	upstream_gene_variant ; yaaO ; c.-82A>G ; . ; . ; . ; . ;	upstream_gene_variant ; tmk ; c.-1521A>G ; . ; . ; . ; . ;	upstream_gene_variant ; darA ; c.-2233A>G ; . ; . ; . ; . ;	upstream_gene_variant ; yaaR ; c.-2575A>G ; . ; . ; . ; . ;
NC_000964.3	37666	G	C	225	hom	245	245	.	.	.	.	.	.	upstream_gene_variant ; yaaO ; c.-54G>C ; . ; . ; . ; . ;	upstream_gene_variant ; tmk ; c.-1493G>C ; . ; . ; . ; . ;	upstream_gene_variant ; darA ; c.-2205G>C ; . ; . ; . ; . ;	upstream_gene_variant ; yaaR ; c.-2547G>C ; . ; . ; . ; . ;	upstream_gene_variant ; holB ; c.-2999G>C ; . ; . ; . ; . ;
NC_000964.3	37899	T	C	225	hom	174	174	yaaO	gene-BSU_00270	37720	39162	+	synonymous_variant ; yaaO ; c.180T>C ; p.Ser60Ser ; 180/1443 ; 180/1443 ; 60/480 ;	synonymous_variant ; yaaO ; c.180T>C ; p.Ser60Ser ; 180/1443 ; 180/1443 ; 60/480 ;	upstream_gene_variant ; tmk ; c.-1260T>C ; . ; . ; . ; . ;	upstream_gene_variant ; darA ; c.-1972T>C ; . ; . ; . ; . ;	upstream_gene_variant ; yaaR ; c.-2314T>C ; . ; . ; . ; . ;	upstream_gene_variant ; holB ; c.-2766T>C ; . ; . ; . ; . ;
NC_000964.3	37928	C	T	225	hom	172	172	yaaO	gene-BSU_00270	37720	39162	+	missense_variant ; yaaO ; c.209C>T ; p.Ala70Val ; 209/1443 ; 209/1443 ; 70/480 ;	missense_variant ; yaaO ; c.209C>T ; p.Ala70Val ; 209/1443 ; 209/1443 ; 70/480 ;	upstream_gene_variant ; tmk ; c.-1231C>T ; . ; . ; . ; . ;	upstream_gene_variant ; darA ; c.-1943C>T ; . ; . ; . ; . ;	upstream_gene_variant ; yaaR ; c.-2285C>T ; . ; . ; . ; . ;	upstream_gene_variant ; holB ; c.-2737C>T ; . ; . ; . ; . ;
NC_000964.3	38080	T	G	225	hom	231	231	yaaO	gene-BSU_00270	37720	39162	+	missense_variant ; yaaO ; c.361T>G ; p.Ser121Ala ; 361/1443 ; 361/1443 ; 121/480 ;	missense_variant ; yaaO ; c.361T>G ; p.Ser121Ala ; 361/1443 ; 361/1443 ; 121/480 ;	upstream_gene_variant ; tmk ; c.-1079T>G ; . ; . ; . ; . ;	upstream_gene_variant ; darA ; c.-1791T>G ; . ; . ; . ; . ;	upstream_gene_variant ; yaaR ; c.-2133T>G ; . ; . ; . ; . ;	upstream_gene_variant ; holB ; c.-2585T>G ; . ; . ; . ; . ;
NC_000964.3	38174	A	C	225	hom	242	242	yaaO	gene-BSU_00270	37720	39162	+	missense_variant ; yaaO ; c.455A>C ; p.Glu152Ala ; 455/1443 ; 455/1443 ; 152/480 ;	missense_variant ; yaaO ; c.455A>C ; p.Glu152Ala ; 455/1443 ; 455/1443 ; 152/480 ;	upstream_gene_variant ; tmk ; c.-985A>C ; . ; . ; . ; . ;	upstream_gene_variant ; darA ; c.-1697A>C ; . ; . ; . ; . ;	upstream_gene_variant ; yaaR ; c.-2039A>C ; . ; . ; . ; . ;	upstream_gene_variant ; holB ; c.-2491A>C ; . ; . ; . ; . ;
NC_000964.3	38389	T	C	225	hom	163	163	yaaO	gene-BSU_00270	37720	39162	+	synonymous_variant ; yaaO ; c.670T>C ; p.Leu224Leu ; 670/1443 ; 670/1443 ; 224/480 ;	synonymous_variant ; yaaO ; c.670T>C ; p.Leu224Leu ; 670/1443 ; 670/1443 ; 224/480 ;	upstream_gene_variant ; tmk ; c.-770T>C ; . ; . ; . ; . ;	upstream_gene_variant ; darA ; c.-1482T>C ; . ; . ; . ; . ;	upstream_gene_variant ; yaaR ; c.-1824T>C ; . ; . ; . ; . ;	upstream_gene_variant ; holB ; c.-2276T>C ; . ; . ; . ; . ;
NC_000964.3	38394	A	T	225	hom	162	162	yaaO	gene-BSU_00270	37720	39162	+	synonymous_variant ; yaaO ; c.675A>T ; p.Pro225Pro ; 675/1443 ; 675/1443 ; 225/480 ;	synonymous_variant ; yaaO ; c.675A>T ; p.Pro225Pro ; 675/1443 ; 675/1443 ; 225/480 ;	upstream_gene_variant ; tmk ; c.-765A>T ; . ; . ; . ; . ;	upstream_gene_variant ; darA ; c.-1477A>T ; . ; . ; . ; . ;	upstream_gene_variant ; yaaR ; c.-1819A>T ; . ; . ; . ; . ;	upstream_gene_variant ; holB ; c.-2271A>T ; . ; . ; . ; . ;
NC_000964.3	38429	G	C	225	hom	166	166	yaaO	gene-BSU_00270	37720	39162	+	missense_variant ; yaaO ; c.710G>C ; p.Ser237Thr ; 710/1443 ; 710/1443 ; 237/480 ;	missense_variant ; yaaO ; c.710G>C ; p.Ser237Thr ; 710/1443 ; 710/1443 ; 237/480 ;	upstream_gene_variant ; tmk ; c.-730G>C ; . ; . ; . ; . ;	upstream_gene_variant ; darA ; c.-1442G>C ; . ; . ; . ; . ;	upstream_gene_variant ; yaaR ; c.-1784G>C ; . ; . ; . ; . ;	upstream_gene_variant ; holB ; c.-2236G>C ; . ; . ; . ; . ;
NC_000964.3	38587	G	C	225	hom	187	187	yaaO	gene-BSU_00270	37720	39162	+	missense_variant ; yaaO ; c.868G>C ; p.Glu290Gln ; 868/1443 ; 868/1443 ; 290/480 ;	missense_variant ; yaaO ; c.868G>C ; p.Glu290Gln ; 868/1443 ; 868/1443 ; 290/480 ;	upstream_gene_variant ; tmk ; c.-572G>C ; . ; . ; . ; . ;	upstream_gene_variant ; darA ; c.-1284G>C ; . ; . ; . ; . ;	upstream_gene_variant ; yaaR ; c.-1626G>C ; . ; . ; . ; . ;	upstream_gene_variant ; holB ; c.-2078G>C ; . ; . ; . ; . ;
NC_000964.3	38664	T	C	225	hom	234	234	yaaO	gene-BSU_00270	37720	39162	+	synonymous_variant ; yaaO ; c.945T>C ; p.Asp315Asp ; 945/1443 ; 945/1443 ; 315/480 ;	synonymous_variant ; yaaO ; c.945T>C ; p.Asp315Asp ; 945/1443 ; 945/1443 ; 315/480 ;	upstream_gene_variant ; tmk ; c.-495T>C ; . ; . ; . ; . ;	upstream_gene_variant ; darA ; c.-1207T>C ; . ; . ; . ; . ;	upstream_gene_variant ; yaaR ; c.-1549T>C ; . ; . ; . ; . ;	upstream_gene_variant ; holB ; c.-2001T>C ; . ; . ; . ; . ;
NC_000964.3	38670	A	G	225	hom	239	239	yaaO	gene-BSU_00270	37720	39162	+	synonymous_variant ; yaaO ; c.951A>G ; p.Leu317Leu ; 951/1443 ; 951/1443 ; 317/480 ;	synonymous_variant ; yaaO ; c.951A>G ; p.Leu317Leu ; 951/1443 ; 951/1443 ; 317/480 ;	upstream_gene_variant ; tmk ; c.-489A>G ; . ; . ; . ; . ;	upstream_gene_variant ; darA ; c.-1201A>G ; . ; . ; . ; . ;	upstream_gene_variant ; yaaR ; c.-1543A>G ; . ; . ; . ; . ;	upstream_gene_variant ; holB ; c.-1995A>G ; . ; . ; . ; . ;
NC_000964.3	38724	T	A	225	hom	252	252	yaaO	gene-BSU_00270	37720	39162	+	synonymous_variant ; yaaO ; c.1005T>A ; p.Ile335Ile ; 1005/1443 ; 1005/1443 ; 335/480 ;	synonymous_variant ; yaaO ; c.1005T>A ; p.Ile335Ile ; 1005/1443 ; 1005/1443 ; 335/480 ;	upstream_gene_variant ; tmk ; c.-435T>A ; . ; . ; . ; . ;	upstream_gene_variant ; darA ; c.-1147T>A ; . ; . ; . ; . ;	upstream_gene_variant ; yaaR ; c.-1489T>A ; . ; . ; . ; . ;	upstream_gene_variant ; holB ; c.-1941T>A ; . ; . ; . ; . ;
NC_000964.3	38819	T	C	225	hom	254	254	yaaO	gene-BSU_00270	37720	39162	+	missense_variant ; yaaO ; c.1100T>C ; p.Ile367Thr ; 1100/1443 ; 1100/1443 ; 367/480 ;	missense_variant ; yaaO ; c.1100T>C ; p.Ile367Thr ; 1100/1443 ; 1100/1443 ; 367/480 ;	upstream_gene_variant ; tmk ; c.-340T>C ; . ; . ; . ; . ;	upstream_gene_variant ; darA ; c.-1052T>C ; . ; . ; . ; . ;	upstream_gene_variant ; yaaR ; c.-1394T>C ; . ; . ; . ; . ;	upstream_gene_variant ; holB ; c.-1846T>C ; . ; . ; . ; . ;
NC_000964.3	38889	T	A	225	hom	236	236	yaaO	gene-BSU_00270	37720	39162	+	synonymous_variant ; yaaO ; c.1170T>A ; p.Gly390Gly ; 1170/1443 ; 1170/1443 ; 390/480 ;	synonymous_variant ; yaaO ; c.1170T>A ; p.Gly390Gly ; 1170/1443 ; 1170/1443 ; 390/480 ;	upstream_gene_variant ; tmk ; c.-270T>A ; . ; . ; . ; . ;	upstream_gene_variant ; darA ; c.-982T>A ; . ; . ; . ; . ;	upstream_gene_variant ; yaaR ; c.-1324T>A ; . ; . ; . ; . ;	upstream_gene_variant ; holB ; c.-1776T>A ; . ; . ; . ; . ;
NC_000964.3	38956	A	G	225	hom	240	240	yaaO	gene-BSU_00270	37720	39162	+	missense_variant ; yaaO ; c.1237A>G ; p.Ser413Gly ; 1237/1443 ; 1237/1443 ; 413/480 ;	missense_variant ; yaaO ; c.1237A>G ; p.Ser413Gly ; 1237/1443 ; 1237/1443 ; 413/480 ;	upstream_gene_variant ; tmk ; c.-203A>G ; . ; . ; . ; . ;	upstream_gene_variant ; darA ; c.-915A>G ; . ; . ; . ; . ;	upstream_gene_variant ; yaaR ; c.-1257A>G ; . ; . ; . ; . ;	upstream_gene_variant ; holB ; c.-1709A>G ; . ; . ; . ; . ;
NC_000964.3	38957	G	A	225	hom	240	240	yaaO	gene-BSU_00270	37720	39162	+	missense_variant ; yaaO ; c.1238G>A ; p.Ser413Asn ; 1238/1443 ; 1238/1443 ; 413/480 ;	missense_variant ; yaaO ; c.1238G>A ; p.Ser413Asn ; 1238/1443 ; 1238/1443 ; 413/480 ;	upstream_gene_variant ; tmk ; c.-202G>A ; . ; . ; . ; . ;	upstream_gene_variant ; darA ; c.-914G>A ; . ; . ; . ; . ;	upstream_gene_variant ; yaaR ; c.-1256G>A ; . ; . ; . ; . ;	upstream_gene_variant ; holB ; c.-1708G>A ; . ; . ; . ; . ;
NC_000964.3	38982	T	G	225	hom	257	257	yaaO	gene-BSU_00270	37720	39162	+	synonymous_variant ; yaaO ; c.1263T>G ; p.Leu421Leu ; 1263/1443 ; 1263/1443 ; 421/480 ;	synonymous_variant ; yaaO ; c.1263T>G ; p.Leu421Leu ; 1263/1443 ; 1263/1443 ; 421/480 ;	upstream_gene_variant ; tmk ; c.-177T>G ; . ; . ; . ; . ;	upstream_gene_variant ; darA ; c.-889T>G ; . ; . ; . ; . ;	upstream_gene_variant ; yaaR ; c.-1231T>G ; . ; . ; . ; . ;	upstream_gene_variant ; holB ; c.-1683T>G ; . ; . ; . ; . ;
NC_000964.3	39009	T	G	228	hom	274	273	yaaO	gene-BSU_00270	37720	39162	+	synonymous_variant ; yaaO ; c.1290T>G ; p.Pro430Pro ; 1290/1443 ; 1290/1443 ; 430/480 ;	synonymous_variant ; yaaO ; c.1290T>G ; p.Pro430Pro ; 1290/1443 ; 1290/1443 ; 430/480 ;	upstream_gene_variant ; tmk ; c.-150T>G ; . ; . ; . ; . ;	upstream_gene_variant ; darA ; c.-862T>G ; . ; . ; . ; . ;	upstream_gene_variant ; yaaR ; c.-1204T>G ; . ; . ; . ; . ;	upstream_gene_variant ; holB ; c.-1656T>G ; . ; . ; . ; . ;
NC_000964.3	39165	G	T	225	hom	324	324	tmk	gene-BSU_00280	39159	39797	+	missense_variant ; tmk ; c.7G>T ; p.Gly3Cys ; 7/639 ; 7/639 ; 3/212 ;	missense_variant ; tmk ; c.7G>T ; p.Gly3Cys ; 7/639 ; 7/639 ; 3/212 ;	upstream_gene_variant ; darA ; c.-706G>T ; . ; . ; . ; . ;	upstream_gene_variant ; yaaR ; c.-1048G>T ; . ; . ; . ; . ;	upstream_gene_variant ; holB ; c.-1500G>T ; . ; . ; . ; . ;	upstream_gene_variant ; ricT ; c.-2492G>T ; . ; . ; . ; . ;
NC_000964.3	39203	G	A	225	hom	323	323	tmk	gene-BSU_00280	39159	39797	+	synonymous_variant ; tmk ; c.45G>A ; p.Gly15Gly ; 45/639 ; 45/639 ; 15/212 ;	synonymous_variant ; tmk ; c.45G>A ; p.Gly15Gly ; 45/639 ; 45/639 ; 15/212 ;	upstream_gene_variant ; darA ; c.-668G>A ; . ; . ; . ; . ;	upstream_gene_variant ; yaaR ; c.-1010G>A ; . ; . ; . ; . ;	upstream_gene_variant ; holB ; c.-1462G>A ; . ; . ; . ; . ;	upstream_gene_variant ; ricT ; c.-2454G>A ; . ; . ; . ; . ;
NC_000964.3	39306	A	C	225	hom	277	277	tmk	gene-BSU_00280	39159	39797	+	synonymous_variant ; tmk ; c.148A>C ; p.Arg50Arg ; 148/639 ; 148/639 ; 50/212 ;	synonymous_variant ; tmk ; c.148A>C ; p.Arg50Arg ; 148/639 ; 148/639 ; 50/212 ;	upstream_gene_variant ; darA ; c.-565A>C ; . ; . ; . ; . ;	upstream_gene_variant ; yaaR ; c.-907A>C ; . ; . ; . ; . ;	upstream_gene_variant ; holB ; c.-1359A>C ; . ; . ; . ; . ;	upstream_gene_variant ; ricT ; c.-2351A>C ; . ; . ; . ; . ;
NC_000964.3	39334	T	C	225	hom	265	265	tmk	gene-BSU_00280	39159	39797	+	missense_variant ; tmk ; c.176T>C ; p.Ile59Thr ; 176/639 ; 176/639 ; 59/212 ;	missense_variant ; tmk ; c.176T>C ; p.Ile59Thr ; 176/639 ; 176/639 ; 59/212 ;	upstream_gene_variant ; darA ; c.-537T>C ; . ; . ; . ; . ;	upstream_gene_variant ; yaaR ; c.-879T>C ; . ; . ; . ; . ;	upstream_gene_variant ; holB ; c.-1331T>C ; . ; . ; . ; . ;	upstream_gene_variant ; ricT ; c.-2323T>C ; . ; . ; . ; . ;
NC_000964.3	39488	G	A	225	hom	144	144	tmk	gene-BSU_00280	39159	39797	+	synonymous_variant ; tmk ; c.330G>A ; p.Gly110Gly ; 330/639 ; 330/639 ; 110/212 ;	synonymous_variant ; tmk ; c.330G>A ; p.Gly110Gly ; 330/639 ; 330/639 ; 110/212 ;	upstream_gene_variant ; darA ; c.-383G>A ; . ; . ; . ; . ;	upstream_gene_variant ; yaaR ; c.-725G>A ; . ; . ; . ; . ;	upstream_gene_variant ; holB ; c.-1177G>A ; . ; . ; . ; . ;	upstream_gene_variant ; ricT ; c.-2169G>A ; . ; . ; . ; . ;
NC_000964.3	39963	A	G	225	hom	196	196	darA	gene-BSU_00290	39871	40200	+	synonymous_variant ; darA ; c.93A>G ; p.Ala31Ala ; 93/330 ; 93/330 ; 31/109 ;	synonymous_variant ; darA ; c.93A>G ; p.Ala31Ala ; 93/330 ; 93/330 ; 31/109 ;	upstream_gene_variant ; yaaR ; c.-250A>G ; . ; . ; . ; . ;	upstream_gene_variant ; holB ; c.-702A>G ; . ; . ; . ; . ;	upstream_gene_variant ; ricT ; c.-1694A>G ; . ; . ; . ; . ;	upstream_gene_variant ; dnaH ; c.-2536A>G ; . ; . ; . ; . ;
NC_000964.3	40104	T	C	225	hom	176	176	darA	gene-BSU_00290	39871	40200	+	synonymous_variant ; darA ; c.234T>C ; p.Gly78Gly ; 234/330 ; 234/330 ; 78/109 ;	synonymous_variant ; darA ; c.234T>C ; p.Gly78Gly ; 234/330 ; 234/330 ; 78/109 ;	upstream_gene_variant ; yaaR ; c.-109T>C ; . ; . ; . ; . ;	upstream_gene_variant ; holB ; c.-561T>C ; . ; . ; . ; . ;	upstream_gene_variant ; ricT ; c.-1553T>C ; . ; . ; . ; . ;	upstream_gene_variant ; dnaH ; c.-2395T>C ; . ; . ; . ; . ;
NC_000964.3	40317	A	T	225	hom	146	146	yaaR	gene-BSU_00300	40213	40653	+	missense_variant ; yaaR ; c.105A>T ; p.Gln35His ; 105/441 ; 105/441 ; 35/146 ;	missense_variant ; yaaR ; c.105A>T ; p.Gln35His ; 105/441 ; 105/441 ; 35/146 ;	upstream_gene_variant ; holB ; c.-348A>T ; . ; . ; . ; . ;	upstream_gene_variant ; ricT ; c.-1340A>T ; . ; . ; . ; . ;	upstream_gene_variant ; dnaH ; c.-2182A>T ; . ; . ; . ; . ;	upstream_gene_variant ; trmNF ; c.-2600A>T ; . ; . ; . ; . ;
NC_000964.3	40368	A	G	225	hom	159	159	yaaR	gene-BSU_00300	40213	40653	+	synonymous_variant ; yaaR ; c.156A>G ; p.Glu52Glu ; 156/441 ; 156/441 ; 52/146 ;	synonymous_variant ; yaaR ; c.156A>G ; p.Glu52Glu ; 156/441 ; 156/441 ; 52/146 ;	upstream_gene_variant ; holB ; c.-297A>G ; . ; . ; . ; . ;	upstream_gene_variant ; ricT ; c.-1289A>G ; . ; . ; . ; . ;	upstream_gene_variant ; dnaH ; c.-2131A>G ; . ; . ; . ; . ;	upstream_gene_variant ; trmNF ; c.-2549A>G ; . ; . ; . ; . ;
NC_000964.3	40374	T	C	225	hom	153	153	yaaR	gene-BSU_00300	40213	40653	+	synonymous_variant ; yaaR ; c.162T>C ; p.Phe54Phe ; 162/441 ; 162/441 ; 54/146 ;	synonymous_variant ; yaaR ; c.162T>C ; p.Phe54Phe ; 162/441 ; 162/441 ; 54/146 ;	upstream_gene_variant ; holB ; c.-291T>C ; . ; . ; . ; . ;	upstream_gene_variant ; ricT ; c.-1283T>C ; . ; . ; . ; . ;	upstream_gene_variant ; dnaH ; c.-2125T>C ; . ; . ; . ; . ;	upstream_gene_variant ; trmNF ; c.-2543T>C ; . ; . ; . ; . ;
NC_000964.3	40467	T	C	225	hom	163	163	yaaR	gene-BSU_00300	40213	40653	+	synonymous_variant ; yaaR ; c.255T>C ; p.Gly85Gly ; 255/441 ; 255/441 ; 85/146 ;	synonymous_variant ; yaaR ; c.255T>C ; p.Gly85Gly ; 255/441 ; 255/441 ; 85/146 ;	upstream_gene_variant ; holB ; c.-198T>C ; . ; . ; . ; . ;	upstream_gene_variant ; ricT ; c.-1190T>C ; . ; . ; . ; . ;	upstream_gene_variant ; dnaH ; c.-2032T>C ; . ; . ; . ; . ;	upstream_gene_variant ; trmNF ; c.-2450T>C ; . ; . ; . ; . ;
NC_000964.3	40596	T	A	225	hom	188	188	yaaR	gene-BSU_00300	40213	40653	+	synonymous_variant ; yaaR ; c.384T>A ; p.Ile128Ile ; 384/441 ; 384/441 ; 128/146 ;	synonymous_variant ; yaaR ; c.384T>A ; p.Ile128Ile ; 384/441 ; 384/441 ; 128/146 ;	upstream_gene_variant ; holB ; c.-69T>A ; . ; . ; . ; . ;	upstream_gene_variant ; ricT ; c.-1061T>A ; . ; . ; . ; . ;	upstream_gene_variant ; dnaH ; c.-1903T>A ; . ; . ; . ; . ;	upstream_gene_variant ; trmNF ; c.-2321T>A ; . ; . ; . ; . ;
NC_000964.3	40837	G	A	225	hom	133	133	holB	gene-BSU_00310	40665	41654	+	missense_variant ; holB ; c.173G>A ; p.Gly58Asp ; 173/990 ; 173/990 ; 58/329 ;	missense_variant ; holB ; c.173G>A ; p.Gly58Asp ; 173/990 ; 173/990 ; 58/329 ;	upstream_gene_variant ; ricT ; c.-820G>A ; . ; . ; . ; . ;	upstream_gene_variant ; dnaH ; c.-1662G>A ; . ; . ; . ; . ;	upstream_gene_variant ; trmNF ; c.-2080G>A ; . ; . ; . ; . ;	upstream_gene_variant ; yazA ; c.-2810G>A ; . ; . ; . ; . ;
NC_000964.3	41192	C	T	225	hom	140	140	holB	gene-BSU_00310	40665	41654	+	synonymous_variant ; holB ; c.528C>T ; p.Asp176Asp ; 528/990 ; 528/990 ; 176/329 ;	synonymous_variant ; holB ; c.528C>T ; p.Asp176Asp ; 528/990 ; 528/990 ; 176/329 ;	upstream_gene_variant ; ricT ; c.-465C>T ; . ; . ; . ; . ;	upstream_gene_variant ; dnaH ; c.-1307C>T ; . ; . ; . ; . ;	upstream_gene_variant ; trmNF ; c.-1725C>T ; . ; . ; . ; . ;	upstream_gene_variant ; yazA ; c.-2455C>T ; . ; . ; . ; . ;
NC_000964.3	41249	T	C	225	hom	151	151	holB	gene-BSU_00310	40665	41654	+	synonymous_variant ; holB ; c.585T>C ; p.Thr195Thr ; 585/990 ; 585/990 ; 195/329 ;	synonymous_variant ; holB ; c.585T>C ; p.Thr195Thr ; 585/990 ; 585/990 ; 195/329 ;	upstream_gene_variant ; ricT ; c.-408T>C ; . ; . ; . ; . ;	upstream_gene_variant ; dnaH ; c.-1250T>C ; . ; . ; . ; . ;	upstream_gene_variant ; trmNF ; c.-1668T>C ; . ; . ; . ; . ;	upstream_gene_variant ; yazA ; c.-2398T>C ; . ; . ; . ; . ;
NC_000964.3	41857	A	T	225	hom	235	235	ricT	gene-BSU_00320	41657	42484	+	synonymous_variant ; ricT ; c.201A>T ; p.Ala67Ala ; 201/828 ; 201/828 ; 67/275 ;	synonymous_variant ; ricT ; c.201A>T ; p.Ala67Ala ; 201/828 ; 201/828 ; 67/275 ;	upstream_gene_variant ; dnaH ; c.-642A>T ; . ; . ; . ; . ;	upstream_gene_variant ; trmNF ; c.-1060A>T ; . ; . ; . ; . ;	upstream_gene_variant ; yazA ; c.-1790A>T ; . ; . ; . ; . ;	upstream_gene_variant ; rsmI ; c.-2064A>T ; . ; . ; . ; . ;
NC_000964.3	41863	T	G	225	hom	228	228	ricT	gene-BSU_00320	41657	42484	+	missense_variant ; ricT ; c.207T>G ; p.Asp69Glu ; 207/828 ; 207/828 ; 69/275 ;	missense_variant ; ricT ; c.207T>G ; p.Asp69Glu ; 207/828 ; 207/828 ; 69/275 ;	upstream_gene_variant ; dnaH ; c.-636T>G ; . ; . ; . ; . ;	upstream_gene_variant ; trmNF ; c.-1054T>G ; . ; . ; . ; . ;	upstream_gene_variant ; yazA ; c.-1784T>G ; . ; . ; . ; . ;	upstream_gene_variant ; rsmI ; c.-2058T>G ; . ; . ; . ; . ;
NC_000964.3	42121	C	A	225	hom	109	109	ricT	gene-BSU_00320	41657	42484	+	synonymous_variant ; ricT ; c.465C>A ; p.Leu155Leu ; 465/828 ; 465/828 ; 155/275 ;	synonymous_variant ; ricT ; c.465C>A ; p.Leu155Leu ; 465/828 ; 465/828 ; 155/275 ;	upstream_gene_variant ; dnaH ; c.-378C>A ; . ; . ; . ; . ;	upstream_gene_variant ; trmNF ; c.-796C>A ; . ; . ; . ; . ;	upstream_gene_variant ; yazA ; c.-1526C>A ; . ; . ; . ; . ;	upstream_gene_variant ; rsmI ; c.-1800C>A ; . ; . ; . ; . ;
NC_000964.3	42552	C	T	228	hom	360	358	dnaH	gene-BSU_00330	42499	42858	+	synonymous_variant ; dnaH ; c.54C>T ; p.Gly18Gly ; 54/360 ; 54/360 ; 18/119 ;	synonymous_variant ; dnaH ; c.54C>T ; p.Gly18Gly ; 54/360 ; 54/360 ; 18/119 ;	upstream_gene_variant ; trmNF ; c.-365C>T ; . ; . ; . ; . ;	upstream_gene_variant ; yazA ; c.-1095C>T ; . ; . ; . ; . ;	upstream_gene_variant ; rsmI ; c.-1369C>T ; . ; . ; . ; . ;	upstream_gene_variant ; metS ; c.-3081C>T ; . ; . ; . ; . ;
NC_000964.3	42949	T	C	225	hom	118	118	trmNF	gene-BSU_00340	42917	43660	+	synonymous_variant ; trmNF ; c.33T>C ; p.Asp11Asp ; 33/744 ; 33/744 ; 11/247 ;	synonymous_variant ; trmNF ; c.33T>C ; p.Asp11Asp ; 33/744 ; 33/744 ; 11/247 ;	upstream_gene_variant ; yazA ; c.-698T>C ; . ; . ; . ; . ;	upstream_gene_variant ; rsmI ; c.-972T>C ; . ; . ; . ; . ;	upstream_gene_variant ; metS ; c.-2684T>C ; . ; . ; . ; . ;	upstream_gene_variant ; dayD ; c.-4757T>C ; . ; . ; . ; . ;
NC_000964.3	43063	T	C	225	hom	206	206	trmNF	gene-BSU_00340	42917	43660	+	synonymous_variant ; trmNF ; c.147T>C ; p.Ile49Ile ; 147/744 ; 147/744 ; 49/247 ;	synonymous_variant ; trmNF ; c.147T>C ; p.Ile49Ile ; 147/744 ; 147/744 ; 49/247 ;	upstream_gene_variant ; yazA ; c.-584T>C ; . ; . ; . ; . ;	upstream_gene_variant ; rsmI ; c.-858T>C ; . ; . ; . ; . ;	upstream_gene_variant ; metS ; c.-2570T>C ; . ; . ; . ; . ;	upstream_gene_variant ; dayD ; c.-4643T>C ; . ; . ; . ; . ;
NC_000964.3	43144	T	A	225	hom	328	328	trmNF	gene-BSU_00340	42917	43660	+	synonymous_variant ; trmNF ; c.228T>A ; p.Ile76Ile ; 228/744 ; 228/744 ; 76/247 ;	synonymous_variant ; trmNF ; c.228T>A ; p.Ile76Ile ; 228/744 ; 228/744 ; 76/247 ;	upstream_gene_variant ; yazA ; c.-503T>A ; . ; . ; . ; . ;	upstream_gene_variant ; rsmI ; c.-777T>A ; . ; . ; . ; . ;	upstream_gene_variant ; metS ; c.-2489T>A ; . ; . ; . ; . ;	upstream_gene_variant ; dayD ; c.-4562T>A ; . ; . ; . ; . ;
NC_000964.3	43153	A	G	225	hom	332	332	trmNF	gene-BSU_00340	42917	43660	+	synonymous_variant ; trmNF ; c.237A>G ; p.Arg79Arg ; 237/744 ; 237/744 ; 79/247 ;	synonymous_variant ; trmNF ; c.237A>G ; p.Arg79Arg ; 237/744 ; 237/744 ; 79/247 ;	upstream_gene_variant ; yazA ; c.-494A>G ; . ; . ; . ; . ;	upstream_gene_variant ; rsmI ; c.-768A>G ; . ; . ; . ; . ;	upstream_gene_variant ; metS ; c.-2480A>G ; . ; . ; . ; . ;	upstream_gene_variant ; dayD ; c.-4553A>G ; . ; . ; . ; . ;
NC_000964.3	43193	T	C	225	hom	342	342	trmNF	gene-BSU_00340	42917	43660	+	synonymous_variant ; trmNF ; c.277T>C ; p.Leu93Leu ; 277/744 ; 277/744 ; 93/247 ;	synonymous_variant ; trmNF ; c.277T>C ; p.Leu93Leu ; 277/744 ; 277/744 ; 93/247 ;	upstream_gene_variant ; yazA ; c.-454T>C ; . ; . ; . ; . ;	upstream_gene_variant ; rsmI ; c.-728T>C ; . ; . ; . ; . ;	upstream_gene_variant ; metS ; c.-2440T>C ; . ; . ; . ; . ;	upstream_gene_variant ; dayD ; c.-4513T>C ; . ; . ; . ; . ;
NC_000964.3	43196	G	C	225	hom	339	339	trmNF	gene-BSU_00340	42917	43660	+	missense_variant ; trmNF ; c.280G>C ; p.Asp94His ; 280/744 ; 280/744 ; 94/247 ;	missense_variant ; trmNF ; c.280G>C ; p.Asp94His ; 280/744 ; 280/744 ; 94/247 ;	upstream_gene_variant ; yazA ; c.-451G>C ; . ; . ; . ; . ;	upstream_gene_variant ; rsmI ; c.-725G>C ; . ; . ; . ; . ;	upstream_gene_variant ; metS ; c.-2437G>C ; . ; . ; . ; . ;	upstream_gene_variant ; dayD ; c.-4510G>C ; . ; . ; . ; . ;
NC_000964.3	43198	C	G	225	hom	341	341	trmNF	gene-BSU_00340	42917	43660	+	missense_variant ; trmNF ; c.282C>G ; p.Asp94Glu ; 282/744 ; 282/744 ; 94/247 ;	missense_variant ; trmNF ; c.282C>G ; p.Asp94Glu ; 282/744 ; 282/744 ; 94/247 ;	upstream_gene_variant ; yazA ; c.-449C>G ; . ; . ; . ; . ;	upstream_gene_variant ; rsmI ; c.-723C>G ; . ; . ; . ; . ;	upstream_gene_variant ; metS ; c.-2435C>G ; . ; . ; . ; . ;	upstream_gene_variant ; dayD ; c.-4508C>G ; . ; . ; . ; . ;
NC_000964.3	43207	C	T	225	hom	361	361	trmNF	gene-BSU_00340	42917	43660	+	synonymous_variant ; trmNF ; c.291C>T ; p.Ile97Ile ; 291/744 ; 291/744 ; 97/247 ;	synonymous_variant ; trmNF ; c.291C>T ; p.Ile97Ile ; 291/744 ; 291/744 ; 97/247 ;	upstream_gene_variant ; yazA ; c.-440C>T ; . ; . ; . ; . ;	upstream_gene_variant ; rsmI ; c.-714C>T ; . ; . ; . ; . ;	upstream_gene_variant ; metS ; c.-2426C>T ; . ; . ; . ; . ;	upstream_gene_variant ; dayD ; c.-4499C>T ; . ; . ; . ; . ;
NC_000964.3	43300	G	A	225	hom	338	338	trmNF	gene-BSU_00340	42917	43660	+	synonymous_variant ; trmNF ; c.384G>A ; p.Thr128Thr ; 384/744 ; 384/744 ; 128/247 ;	synonymous_variant ; trmNF ; c.384G>A ; p.Thr128Thr ; 384/744 ; 384/744 ; 128/247 ;	upstream_gene_variant ; yazA ; c.-347G>A ; . ; . ; . ; . ;	upstream_gene_variant ; rsmI ; c.-621G>A ; . ; . ; . ; . ;	upstream_gene_variant ; metS ; c.-2333G>A ; . ; . ; . ; . ;	upstream_gene_variant ; dayD ; c.-4406G>A ; . ; . ; . ; . ;
NC_000964.3	43327	C	T	225	hom	311	311	trmNF	gene-BSU_00340	42917	43660	+	synonymous_variant ; trmNF ; c.411C>T ; p.Asn137Asn ; 411/744 ; 411/744 ; 137/247 ;	synonymous_variant ; trmNF ; c.411C>T ; p.Asn137Asn ; 411/744 ; 411/744 ; 137/247 ;	upstream_gene_variant ; yazA ; c.-320C>T ; . ; . ; . ; . ;	upstream_gene_variant ; rsmI ; c.-594C>T ; . ; . ; . ; . ;	upstream_gene_variant ; metS ; c.-2306C>T ; . ; . ; . ; . ;	upstream_gene_variant ; dayD ; c.-4379C>T ; . ; . ; . ; . ;
NC_000964.3	43342	C	T	225	hom	296	296	trmNF	gene-BSU_00340	42917	43660	+	synonymous_variant ; trmNF ; c.426C>T ; p.Ile142Ile ; 426/744 ; 426/744 ; 142/247 ;	synonymous_variant ; trmNF ; c.426C>T ; p.Ile142Ile ; 426/744 ; 426/744 ; 142/247 ;	upstream_gene_variant ; yazA ; c.-305C>T ; . ; . ; . ; . ;	upstream_gene_variant ; rsmI ; c.-579C>T ; . ; . ; . ; . ;	upstream_gene_variant ; metS ; c.-2291C>T ; . ; . ; . ; . ;	upstream_gene_variant ; dayD ; c.-4364C>T ; . ; . ; . ; . ;
NC_000964.3	43366	G	A	225	hom	267	267	trmNF	gene-BSU_00340	42917	43660	+	synonymous_variant ; trmNF ; c.450G>A ; p.Thr150Thr ; 450/744 ; 450/744 ; 150/247 ;	synonymous_variant ; trmNF ; c.450G>A ; p.Thr150Thr ; 450/744 ; 450/744 ; 150/247 ;	upstream_gene_variant ; yazA ; c.-281G>A ; . ; . ; . ; . ;	upstream_gene_variant ; rsmI ; c.-555G>A ; . ; . ; . ; . ;	upstream_gene_variant ; metS ; c.-2267G>A ; . ; . ; . ; . ;	upstream_gene_variant ; dayD ; c.-4340G>A ; . ; . ; . ; . ;
NC_000964.3	43450	G	A	225	hom	149	149	trmNF	gene-BSU_00340	42917	43660	+	synonymous_variant ; trmNF ; c.534G>A ; p.Leu178Leu ; 534/744 ; 534/744 ; 178/247 ;	synonymous_variant ; trmNF ; c.534G>A ; p.Leu178Leu ; 534/744 ; 534/744 ; 178/247 ;	upstream_gene_variant ; yazA ; c.-197G>A ; . ; . ; . ; . ;	upstream_gene_variant ; rsmI ; c.-471G>A ; . ; . ; . ; . ;	upstream_gene_variant ; metS ; c.-2183G>A ; . ; . ; . ; . ;	upstream_gene_variant ; dayD ; c.-4256G>A ; . ; . ; . ; . ;
NC_000964.3	43489	G	A	225	hom	128	128	trmNF	gene-BSU_00340	42917	43660	+	synonymous_variant ; trmNF ; c.573G>A ; p.Pro191Pro ; 573/744 ; 573/744 ; 191/247 ;	synonymous_variant ; trmNF ; c.573G>A ; p.Pro191Pro ; 573/744 ; 573/744 ; 191/247 ;	upstream_gene_variant ; yazA ; c.-158G>A ; . ; . ; . ; . ;	upstream_gene_variant ; rsmI ; c.-432G>A ; . ; . ; . ; . ;	upstream_gene_variant ; metS ; c.-2144G>A ; . ; . ; . ; . ;	upstream_gene_variant ; dayD ; c.-4217G>A ; . ; . ; . ; . ;
NC_000964.3	43576	G	A	225	hom	104	104	trmNF	gene-BSU_00340	42917	43660	+	synonymous_variant ; trmNF ; c.660G>A ; p.Leu220Leu ; 660/744 ; 660/744 ; 220/247 ;	synonymous_variant ; trmNF ; c.660G>A ; p.Leu220Leu ; 660/744 ; 660/744 ; 220/247 ;	upstream_gene_variant ; yazA ; c.-71G>A ; . ; . ; . ; . ;	upstream_gene_variant ; rsmI ; c.-345G>A ; . ; . ; . ; . ;	upstream_gene_variant ; metS ; c.-2057G>A ; . ; . ; . ; . ;	upstream_gene_variant ; dayD ; c.-4130G>A ; . ; . ; . ; . ;
NC_000964.3	43591	C	T	225	hom	102	102	trmNF	gene-BSU_00340	42917	43660	+	synonymous_variant ; trmNF ; c.675C>T ; p.Pro225Pro ; 675/744 ; 675/744 ; 225/247 ;	synonymous_variant ; trmNF ; c.675C>T ; p.Pro225Pro ; 675/744 ; 675/744 ; 225/247 ;	upstream_gene_variant ; yazA ; c.-56C>T ; . ; . ; . ; . ;	upstream_gene_variant ; rsmI ; c.-330C>T ; . ; . ; . ; . ;	upstream_gene_variant ; metS ; c.-2042C>T ; . ; . ; . ; . ;	upstream_gene_variant ; dayD ; c.-4115C>T ; . ; . ; . ; . ;
NC_000964.3	43600	A	T	225	hom	108	108	trmNF	gene-BSU_00340	42917	43660	+	synonymous_variant ; trmNF ; c.684A>T ; p.Val228Val ; 684/744 ; 684/744 ; 228/247 ;	synonymous_variant ; trmNF ; c.684A>T ; p.Val228Val ; 684/744 ; 684/744 ; 228/247 ;	upstream_gene_variant ; yazA ; c.-47A>T ; . ; . ; . ; . ;	upstream_gene_variant ; rsmI ; c.-321A>T ; . ; . ; . ; . ;	upstream_gene_variant ; metS ; c.-2033A>T ; . ; . ; . ; . ;	upstream_gene_variant ; dayD ; c.-4106A>T ; . ; . ; . ; . ;
NC_000964.3	43742	G	A	225	hom	141	141	yazA	gene-BSU_00350	43647	43946	+	synonymous_variant ; yazA ; c.96G>A ; p.Thr32Thr ; 96/300 ; 96/300 ; 32/99 ;	synonymous_variant ; yazA ; c.96G>A ; p.Thr32Thr ; 96/300 ; 96/300 ; 32/99 ;	upstream_gene_variant ; rsmI ; c.-179G>A ; . ; . ; . ; . ;	upstream_gene_variant ; metS ; c.-1891G>A ; . ; . ; . ; . ;	upstream_gene_variant ; dayD ; c.-3964G>A ; . ; . ; . ; . ;	upstream_gene_variant ; yabE ; c.-4887G>A ; . ; . ; . ; . ;
NC_000964.3	43760	C	T	225	hom	144	144	yazA	gene-BSU_00350	43647	43946	+	synonymous_variant ; yazA ; c.114C>T ; p.Gly38Gly ; 114/300 ; 114/300 ; 38/99 ;	synonymous_variant ; yazA ; c.114C>T ; p.Gly38Gly ; 114/300 ; 114/300 ; 38/99 ;	upstream_gene_variant ; rsmI ; c.-161C>T ; . ; . ; . ; . ;	upstream_gene_variant ; metS ; c.-1873C>T ; . ; . ; . ; . ;	upstream_gene_variant ; dayD ; c.-3946C>T ; . ; . ; . ; . ;	upstream_gene_variant ; yabE ; c.-4869C>T ; . ; . ; . ; . ;
NC_000964.3	43999	T	C	225	hom	229	229	rsmI	gene-BSU_00360	43921	44799	+	synonymous_variant ; rsmI ; c.79T>C ; p.Leu27Leu ; 79/879 ; 79/879 ; 27/292 ;	synonymous_variant ; rsmI ; c.79T>C ; p.Leu27Leu ; 79/879 ; 79/879 ; 27/292 ;	upstream_gene_variant ; metS ; c.-1634T>C ; . ; . ; . ; . ;	upstream_gene_variant ; dayD ; c.-3707T>C ; . ; . ; . ; . ;	upstream_gene_variant ; yabE ; c.-4630T>C ; . ; . ; . ; . ;	downstream_gene_variant ; yaaO ; c.*4837T>C ; . ; . ; . ; . ;
NC_000964.3	44175	A	G	225	hom	196	196	rsmI	gene-BSU_00360	43921	44799	+	synonymous_variant ; rsmI ; c.255A>G ; p.Lys85Lys ; 255/879 ; 255/879 ; 85/292 ;	synonymous_variant ; rsmI ; c.255A>G ; p.Lys85Lys ; 255/879 ; 255/879 ; 85/292 ;	upstream_gene_variant ; metS ; c.-1458A>G ; . ; . ; . ; . ;	upstream_gene_variant ; dayD ; c.-3531A>G ; . ; . ; . ; . ;	upstream_gene_variant ; yabE ; c.-4454A>G ; . ; . ; . ; . ;	downstream_gene_variant ; tmk ; c.*4378A>G ; . ; . ; . ; . ;
NC_000964.3	44284	T	C	225	hom	105	105	rsmI	gene-BSU_00360	43921	44799	+	synonymous_variant ; rsmI ; c.364T>C ; p.Leu122Leu ; 364/879 ; 364/879 ; 122/292 ;	synonymous_variant ; rsmI ; c.364T>C ; p.Leu122Leu ; 364/879 ; 364/879 ; 122/292 ;	upstream_gene_variant ; metS ; c.-1349T>C ; . ; . ; . ; . ;	upstream_gene_variant ; dayD ; c.-3422T>C ; . ; . ; . ; . ;	upstream_gene_variant ; yabE ; c.-4345T>C ; . ; . ; . ; . ;	downstream_gene_variant ; tmk ; c.*4487T>C ; . ; . ; . ; . ;
NC_000964.3	44301	T	C	225	hom	93	93	rsmI	gene-BSU_00360	43921	44799	+	synonymous_variant ; rsmI ; c.381T>C ; p.Ala127Ala ; 381/879 ; 381/879 ; 127/292 ;	synonymous_variant ; rsmI ; c.381T>C ; p.Ala127Ala ; 381/879 ; 381/879 ; 127/292 ;	upstream_gene_variant ; metS ; c.-1332T>C ; . ; . ; . ; . ;	upstream_gene_variant ; dayD ; c.-3405T>C ; . ; . ; . ; . ;	upstream_gene_variant ; yabE ; c.-4328T>C ; . ; . ; . ; . ;	downstream_gene_variant ; tmk ; c.*4504T>C ; . ; . ; . ; . ;
NC_000964.3	44417	A	G	225	hom	102	102	rsmI	gene-BSU_00360	43921	44799	+	missense_variant ; rsmI ; c.497A>G ; p.Gln166Arg ; 497/879 ; 497/879 ; 166/292 ;	missense_variant ; rsmI ; c.497A>G ; p.Gln166Arg ; 497/879 ; 497/879 ; 166/292 ;	upstream_gene_variant ; metS ; c.-1216A>G ; . ; . ; . ; . ;	upstream_gene_variant ; dayD ; c.-3289A>G ; . ; . ; . ; . ;	upstream_gene_variant ; yabE ; c.-4212A>G ; . ; . ; . ; . ;	downstream_gene_variant ; tmk ; c.*4620A>G ; . ; . ; . ; . ;
NC_000964.3	44445	C	T	225	hom	122	122	rsmI	gene-BSU_00360	43921	44799	+	synonymous_variant ; rsmI ; c.525C>T ; p.Pro175Pro ; 525/879 ; 525/879 ; 175/292 ;	synonymous_variant ; rsmI ; c.525C>T ; p.Pro175Pro ; 525/879 ; 525/879 ; 175/292 ;	upstream_gene_variant ; metS ; c.-1188C>T ; . ; . ; . ; . ;	upstream_gene_variant ; dayD ; c.-3261C>T ; . ; . ; . ; . ;	upstream_gene_variant ; yabE ; c.-4184C>T ; . ; . ; . ; . ;	downstream_gene_variant ; tmk ; c.*4648C>T ; . ; . ; . ; . ;
NC_000964.3	44502	T	A	225	hom	174	174	rsmI	gene-BSU_00360	43921	44799	+	synonymous_variant ; rsmI ; c.582T>A ; p.Ile194Ile ; 582/879 ; 582/879 ; 194/292 ;	synonymous_variant ; rsmI ; c.582T>A ; p.Ile194Ile ; 582/879 ; 582/879 ; 194/292 ;	upstream_gene_variant ; metS ; c.-1131T>A ; . ; . ; . ; . ;	upstream_gene_variant ; dayD ; c.-3204T>A ; . ; . ; . ; . ;	upstream_gene_variant ; yabE ; c.-4127T>A ; . ; . ; . ; . ;	downstream_gene_variant ; tmk ; c.*4705T>A ; . ; . ; . ; . ;
NC_000964.3	44511	A	G	225	hom	184	184	rsmI	gene-BSU_00360	43921	44799	+	synonymous_variant ; rsmI ; c.591A>G ; p.Thr197Thr ; 591/879 ; 591/879 ; 197/292 ;	synonymous_variant ; rsmI ; c.591A>G ; p.Thr197Thr ; 591/879 ; 591/879 ; 197/292 ;	upstream_gene_variant ; metS ; c.-1122A>G ; . ; . ; . ; . ;	upstream_gene_variant ; dayD ; c.-3195A>G ; . ; . ; . ; . ;	upstream_gene_variant ; yabE ; c.-4118A>G ; . ; . ; . ; . ;	downstream_gene_variant ; tmk ; c.*4714A>G ; . ; . ; . ; . ;
NC_000964.3	44544	C	T	225	hom	221	221	rsmI	gene-BSU_00360	43921	44799	+	synonymous_variant ; rsmI ; c.624C>T ; p.Ile208Ile ; 624/879 ; 624/879 ; 208/292 ;	synonymous_variant ; rsmI ; c.624C>T ; p.Ile208Ile ; 624/879 ; 624/879 ; 208/292 ;	upstream_gene_variant ; metS ; c.-1089C>T ; . ; . ; . ; . ;	upstream_gene_variant ; dayD ; c.-3162C>T ; . ; . ; . ; . ;	upstream_gene_variant ; yabE ; c.-4085C>T ; . ; . ; . ; . ;	downstream_gene_variant ; tmk ; c.*4747C>T ; . ; . ; . ; . ;
NC_000964.3	44715	G	A	225	hom	245	245	rsmI	gene-BSU_00360	43921	44799	+	synonymous_variant ; rsmI ; c.795G>A ; p.Thr265Thr ; 795/879 ; 795/879 ; 265/292 ;	synonymous_variant ; rsmI ; c.795G>A ; p.Thr265Thr ; 795/879 ; 795/879 ; 265/292 ;	upstream_gene_variant ; metS ; c.-918G>A ; . ; . ; . ; . ;	upstream_gene_variant ; dayD ; c.-2991G>A ; . ; . ; . ; . ;	upstream_gene_variant ; yabE ; c.-3914G>A ; . ; . ; . ; . ;	downstream_gene_variant ; tmk ; c.*4918G>A ; . ; . ; . ; . ;
NC_000964.3	44727	T	C	225	hom	235	235	rsmI	gene-BSU_00360	43921	44799	+	synonymous_variant ; rsmI ; c.807T>C ; p.Ala269Ala ; 807/879 ; 807/879 ; 269/292 ;	synonymous_variant ; rsmI ; c.807T>C ; p.Ala269Ala ; 807/879 ; 807/879 ; 269/292 ;	upstream_gene_variant ; metS ; c.-906T>C ; . ; . ; . ; . ;	upstream_gene_variant ; dayD ; c.-2979T>C ; . ; . ; . ; . ;	upstream_gene_variant ; yabE ; c.-3902T>C ; . ; . ; . ; . ;	downstream_gene_variant ; tmk ; c.*4930T>C ; . ; . ; . ; . ;
NC_000964.3	45297	G	A	225	hom	90	90	.	.	.	.	.	.	upstream_gene_variant ; abrB ; c.-159C>T ; . ; . ; . ; . ;	upstream_gene_variant ; metS ; c.-336G>A ; . ; . ; . ; . ;	upstream_gene_variant ; dayD ; c.-2409G>A ; . ; . ; . ; . ;	upstream_gene_variant ; yabE ; c.-3332G>A ; . ; . ; . ; . ;	upstream_gene_variant ; rnmV ; c.-4790G>A ; . ; . ; . ; . ;
NC_000964.3	45725	A	G	225	hom	205	205	metS	gene-BSU_00380	45633	47627	+	synonymous_variant ; metS ; c.93A>G ; p.Ala31Ala ; 93/1995 ; 93/1995 ; 31/664 ;	synonymous_variant ; metS ; c.93A>G ; p.Ala31Ala ; 93/1995 ; 93/1995 ; 31/664 ;	upstream_gene_variant ; abrB ; c.-587T>C ; . ; . ; . ; . ;	upstream_gene_variant ; dayD ; c.-1981A>G ; . ; . ; . ; . ;	upstream_gene_variant ; yabE ; c.-2904A>G ; . ; . ; . ; . ;	upstream_gene_variant ; rnmV ; c.-4362A>G ; . ; . ; . ; . ;
NC_000964.3	45772	G	A	225	hom	229	229	metS	gene-BSU_00380	45633	47627	+	missense_variant ; metS ; c.140G>A ; p.Arg47His ; 140/1995 ; 140/1995 ; 47/664 ;	missense_variant ; metS ; c.140G>A ; p.Arg47His ; 140/1995 ; 140/1995 ; 47/664 ;	upstream_gene_variant ; abrB ; c.-634C>T ; . ; . ; . ; . ;	upstream_gene_variant ; dayD ; c.-1934G>A ; . ; . ; . ; . ;	upstream_gene_variant ; yabE ; c.-2857G>A ; . ; . ; . ; . ;	upstream_gene_variant ; rnmV ; c.-4315G>A ; . ; . ; . ; . ;
NC_000964.3	45959	A	G	225	hom	250	250	metS	gene-BSU_00380	45633	47627	+	synonymous_variant ; metS ; c.327A>G ; p.Lys109Lys ; 327/1995 ; 327/1995 ; 109/664 ;	synonymous_variant ; metS ; c.327A>G ; p.Lys109Lys ; 327/1995 ; 327/1995 ; 109/664 ;	upstream_gene_variant ; abrB ; c.-821T>C ; . ; . ; . ; . ;	upstream_gene_variant ; dayD ; c.-1747A>G ; . ; . ; . ; . ;	upstream_gene_variant ; yabE ; c.-2670A>G ; . ; . ; . ; . ;	upstream_gene_variant ; rnmV ; c.-4128A>G ; . ; . ; . ; . ;
NC_000964.3	46097	C	A	225	hom	219	219	metS	gene-BSU_00380	45633	47627	+	synonymous_variant ; metS ; c.465C>A ; p.Gly155Gly ; 465/1995 ; 465/1995 ; 155/664 ;	synonymous_variant ; metS ; c.465C>A ; p.Gly155Gly ; 465/1995 ; 465/1995 ; 155/664 ;	upstream_gene_variant ; abrB ; c.-959G>T ; . ; . ; . ; . ;	upstream_gene_variant ; dayD ; c.-1609C>A ; . ; . ; . ; . ;	upstream_gene_variant ; yabE ; c.-2532C>A ; . ; . ; . ; . ;	upstream_gene_variant ; rnmV ; c.-3990C>A ; . ; . ; . ; . ;
NC_000964.3	46613	A	G	225	hom	182	182	metS	gene-BSU_00380	45633	47627	+	synonymous_variant ; metS ; c.981A>G ; p.Glu327Glu ; 981/1995 ; 981/1995 ; 327/664 ;	synonymous_variant ; metS ; c.981A>G ; p.Glu327Glu ; 981/1995 ; 981/1995 ; 327/664 ;	upstream_gene_variant ; abrB ; c.-1475T>C ; . ; . ; . ; . ;	upstream_gene_variant ; dayD ; c.-1093A>G ; . ; . ; . ; . ;	upstream_gene_variant ; yabE ; c.-2016A>G ; . ; . ; . ; . ;	upstream_gene_variant ; rnmV ; c.-3474A>G ; . ; . ; . ; . ;
NC_000964.3	46631	A	G	225	hom	181	181	metS	gene-BSU_00380	45633	47627	+	synonymous_variant ; metS ; c.999A>G ; p.Glu333Glu ; 999/1995 ; 999/1995 ; 333/664 ;	synonymous_variant ; metS ; c.999A>G ; p.Glu333Glu ; 999/1995 ; 999/1995 ; 333/664 ;	upstream_gene_variant ; abrB ; c.-1493T>C ; . ; . ; . ; . ;	upstream_gene_variant ; dayD ; c.-1075A>G ; . ; . ; . ; . ;	upstream_gene_variant ; yabE ; c.-1998A>G ; . ; . ; . ; . ;	upstream_gene_variant ; rnmV ; c.-3456A>G ; . ; . ; . ; . ;
NC_000964.3	46644	T	C	225	hom	195	195	metS	gene-BSU_00380	45633	47627	+	synonymous_variant ; metS ; c.1012T>C ; p.Leu338Leu ; 1012/1995 ; 1012/1995 ; 338/664 ;	synonymous_variant ; metS ; c.1012T>C ; p.Leu338Leu ; 1012/1995 ; 1012/1995 ; 338/664 ;	upstream_gene_variant ; abrB ; c.-1506A>G ; . ; . ; . ; . ;	upstream_gene_variant ; dayD ; c.-1062T>C ; . ; . ; . ; . ;	upstream_gene_variant ; yabE ; c.-1985T>C ; . ; . ; . ; . ;	upstream_gene_variant ; rnmV ; c.-3443T>C ; . ; . ; . ; . ;
NC_000964.3	46670	A	T	225	hom	212	212	metS	gene-BSU_00380	45633	47627	+	synonymous_variant ; metS ; c.1038A>T ; p.Ser346Ser ; 1038/1995 ; 1038/1995 ; 346/664 ;	synonymous_variant ; metS ; c.1038A>T ; p.Ser346Ser ; 1038/1995 ; 1038/1995 ; 346/664 ;	upstream_gene_variant ; abrB ; c.-1532T>A ; . ; . ; . ; . ;	upstream_gene_variant ; dayD ; c.-1036A>T ; . ; . ; . ; . ;	upstream_gene_variant ; yabE ; c.-1959A>T ; . ; . ; . ; . ;	upstream_gene_variant ; rnmV ; c.-3417A>T ; . ; . ; . ; . ;
NC_000964.3	46679	T	A	225	hom	210	210	metS	gene-BSU_00380	45633	47627	+	synonymous_variant ; metS ; c.1047T>A ; p.Val349Val ; 1047/1995 ; 1047/1995 ; 349/664 ;	synonymous_variant ; metS ; c.1047T>A ; p.Val349Val ; 1047/1995 ; 1047/1995 ; 349/664 ;	upstream_gene_variant ; abrB ; c.-1541A>T ; . ; . ; . ; . ;	upstream_gene_variant ; dayD ; c.-1027T>A ; . ; . ; . ; . ;	upstream_gene_variant ; yabE ; c.-1950T>A ; . ; . ; . ; . ;	upstream_gene_variant ; rnmV ; c.-3408T>A ; . ; . ; . ; . ;
NC_000964.3	46766	T	C	225	hom	200	200	metS	gene-BSU_00380	45633	47627	+	synonymous_variant ; metS ; c.1134T>C ; p.Ile378Ile ; 1134/1995 ; 1134/1995 ; 378/664 ;	synonymous_variant ; metS ; c.1134T>C ; p.Ile378Ile ; 1134/1995 ; 1134/1995 ; 378/664 ;	upstream_gene_variant ; abrB ; c.-1628A>G ; . ; . ; . ; . ;	upstream_gene_variant ; dayD ; c.-940T>C ; . ; . ; . ; . ;	upstream_gene_variant ; yabE ; c.-1863T>C ; . ; . ; . ; . ;	upstream_gene_variant ; rnmV ; c.-3321T>C ; . ; . ; . ; . ;
NC_000964.3	46826	T	A	225	hom	179	179	metS	gene-BSU_00380	45633	47627	+	missense_variant ; metS ; c.1194T>A ; p.His398Gln ; 1194/1995 ; 1194/1995 ; 398/664 ;	missense_variant ; metS ; c.1194T>A ; p.His398Gln ; 1194/1995 ; 1194/1995 ; 398/664 ;	upstream_gene_variant ; abrB ; c.-1688A>T ; . ; . ; . ; . ;	upstream_gene_variant ; dayD ; c.-880T>A ; . ; . ; . ; . ;	upstream_gene_variant ; yabE ; c.-1803T>A ; . ; . ; . ; . ;	upstream_gene_variant ; rnmV ; c.-3261T>A ; . ; . ; . ; . ;
NC_000964.3	46838	T	C	225	hom	182	182	metS	gene-BSU_00380	45633	47627	+	synonymous_variant ; metS ; c.1206T>C ; p.Ser402Ser ; 1206/1995 ; 1206/1995 ; 402/664 ;	synonymous_variant ; metS ; c.1206T>C ; p.Ser402Ser ; 1206/1995 ; 1206/1995 ; 402/664 ;	upstream_gene_variant ; abrB ; c.-1700A>G ; . ; . ; . ; . ;	upstream_gene_variant ; dayD ; c.-868T>C ; . ; . ; . ; . ;	upstream_gene_variant ; yabE ; c.-1791T>C ; . ; . ; . ; . ;	upstream_gene_variant ; rnmV ; c.-3249T>C ; . ; . ; . ; . ;
NC_000964.3	47006	A	C	225	hom	163	163	metS	gene-BSU_00380	45633	47627	+	synonymous_variant ; metS ; c.1374A>C ; p.Ser458Ser ; 1374/1995 ; 1374/1995 ; 458/664 ;	synonymous_variant ; metS ; c.1374A>C ; p.Ser458Ser ; 1374/1995 ; 1374/1995 ; 458/664 ;	upstream_gene_variant ; abrB ; c.-1868T>G ; . ; . ; . ; . ;	upstream_gene_variant ; dayD ; c.-700A>C ; . ; . ; . ; . ;	upstream_gene_variant ; yabE ; c.-1623A>C ; . ; . ; . ; . ;	upstream_gene_variant ; rnmV ; c.-3081A>C ; . ; . ; . ; . ;
NC_000964.3	47018	T	C	225	hom	159	159	metS	gene-BSU_00380	45633	47627	+	synonymous_variant ; metS ; c.1386T>C ; p.His462His ; 1386/1995 ; 1386/1995 ; 462/664 ;	synonymous_variant ; metS ; c.1386T>C ; p.His462His ; 1386/1995 ; 1386/1995 ; 462/664 ;	upstream_gene_variant ; abrB ; c.-1880A>G ; . ; . ; . ; . ;	upstream_gene_variant ; dayD ; c.-688T>C ; . ; . ; . ; . ;	upstream_gene_variant ; yabE ; c.-1611T>C ; . ; . ; . ; . ;	upstream_gene_variant ; rnmV ; c.-3069T>C ; . ; . ; . ; . ;
NC_000964.3	47099	G	A	225	hom	158	158	metS	gene-BSU_00380	45633	47627	+	synonymous_variant ; metS ; c.1467G>A ; p.Leu489Leu ; 1467/1995 ; 1467/1995 ; 489/664 ;	synonymous_variant ; metS ; c.1467G>A ; p.Leu489Leu ; 1467/1995 ; 1467/1995 ; 489/664 ;	upstream_gene_variant ; abrB ; c.-1961C>T ; . ; . ; . ; . ;	upstream_gene_variant ; dayD ; c.-607G>A ; . ; . ; . ; . ;	upstream_gene_variant ; yabE ; c.-1530G>A ; . ; . ; . ; . ;	upstream_gene_variant ; rnmV ; c.-2988G>A ; . ; . ; . ; . ;
NC_000964.3	47102	C	T	225	hom	158	158	metS	gene-BSU_00380	45633	47627	+	synonymous_variant ; metS ; c.1470C>T ; p.Gly490Gly ; 1470/1995 ; 1470/1995 ; 490/664 ;	synonymous_variant ; metS ; c.1470C>T ; p.Gly490Gly ; 1470/1995 ; 1470/1995 ; 490/664 ;	upstream_gene_variant ; abrB ; c.-1964G>A ; . ; . ; . ; . ;	upstream_gene_variant ; dayD ; c.-604C>T ; . ; . ; . ; . ;	upstream_gene_variant ; yabE ; c.-1527C>T ; . ; . ; . ; . ;	upstream_gene_variant ; rnmV ; c.-2985C>T ; . ; . ; . ; . ;
NC_000964.3	47180	C	T	225	hom	195	195	metS	gene-BSU_00380	45633	47627	+	synonymous_variant ; metS ; c.1548C>T ; p.Gly516Gly ; 1548/1995 ; 1548/1995 ; 516/664 ;	synonymous_variant ; metS ; c.1548C>T ; p.Gly516Gly ; 1548/1995 ; 1548/1995 ; 516/664 ;	upstream_gene_variant ; abrB ; c.-2042G>A ; . ; . ; . ; . ;	upstream_gene_variant ; dayD ; c.-526C>T ; . ; . ; . ; . ;	upstream_gene_variant ; yabE ; c.-1449C>T ; . ; . ; . ; . ;	upstream_gene_variant ; rnmV ; c.-2907C>T ; . ; . ; . ; . ;
NC_000964.3	47183	G	T	225	hom	194	194	metS	gene-BSU_00380	45633	47627	+	missense_variant ; metS ; c.1551G>T ; p.Glu517Asp ; 1551/1995 ; 1551/1995 ; 517/664 ;	missense_variant ; metS ; c.1551G>T ; p.Glu517Asp ; 1551/1995 ; 1551/1995 ; 517/664 ;	upstream_gene_variant ; abrB ; c.-2045C>A ; . ; . ; . ; . ;	upstream_gene_variant ; dayD ; c.-523G>T ; . ; . ; . ; . ;	upstream_gene_variant ; yabE ; c.-1446G>T ; . ; . ; . ; . ;	upstream_gene_variant ; rnmV ; c.-2904G>T ; . ; . ; . ; . ;
NC_000964.3	47256	G	T	225	hom	215	215	metS	gene-BSU_00380	45633	47627	+	missense_variant ; metS ; c.1624G>T ; p.Ala542Ser ; 1624/1995 ; 1624/1995 ; 542/664 ;	missense_variant ; metS ; c.1624G>T ; p.Ala542Ser ; 1624/1995 ; 1624/1995 ; 542/664 ;	upstream_gene_variant ; abrB ; c.-2118C>A ; . ; . ; . ; . ;	upstream_gene_variant ; dayD ; c.-450G>T ; . ; . ; . ; . ;	upstream_gene_variant ; yabE ; c.-1373G>T ; . ; . ; . ; . ;	upstream_gene_variant ; rnmV ; c.-2831G>T ; . ; . ; . ; . ;
NC_000964.3	47285	T	G	225	hom	230	230	metS	gene-BSU_00380	45633	47627	+	synonymous_variant ; metS ; c.1653T>G ; p.Pro551Pro ; 1653/1995 ; 1653/1995 ; 551/664 ;	synonymous_variant ; metS ; c.1653T>G ; p.Pro551Pro ; 1653/1995 ; 1653/1995 ; 551/664 ;	upstream_gene_variant ; abrB ; c.-2147A>C ; . ; . ; . ; . ;	upstream_gene_variant ; dayD ; c.-421T>G ; . ; . ; . ; . ;	upstream_gene_variant ; yabE ; c.-1344T>G ; . ; . ; . ; . ;	upstream_gene_variant ; rnmV ; c.-2802T>G ; . ; . ; . ; . ;
NC_000964.3	47327	T	C	225	hom	227	227	metS	gene-BSU_00380	45633	47627	+	synonymous_variant ; metS ; c.1695T>C ; p.Phe565Phe ; 1695/1995 ; 1695/1995 ; 565/664 ;	synonymous_variant ; metS ; c.1695T>C ; p.Phe565Phe ; 1695/1995 ; 1695/1995 ; 565/664 ;	upstream_gene_variant ; abrB ; c.-2189A>G ; . ; . ; . ; . ;	upstream_gene_variant ; dayD ; c.-379T>C ; . ; . ; . ; . ;	upstream_gene_variant ; yabE ; c.-1302T>C ; . ; . ; . ; . ;	upstream_gene_variant ; rnmV ; c.-2760T>C ; . ; . ; . ; . ;
NC_000964.3	47408	T	C	225	hom	200	200	metS	gene-BSU_00380	45633	47627	+	synonymous_variant ; metS ; c.1776T>C ; p.Leu592Leu ; 1776/1995 ; 1776/1995 ; 592/664 ;	synonymous_variant ; metS ; c.1776T>C ; p.Leu592Leu ; 1776/1995 ; 1776/1995 ; 592/664 ;	upstream_gene_variant ; abrB ; c.-2270A>G ; . ; . ; . ; . ;	upstream_gene_variant ; dayD ; c.-298T>C ; . ; . ; . ; . ;	upstream_gene_variant ; yabE ; c.-1221T>C ; . ; . ; . ; . ;	upstream_gene_variant ; rnmV ; c.-2679T>C ; . ; . ; . ; . ;
NC_000964.3	47585	A	G	225	hom	134	134	metS	gene-BSU_00380	45633	47627	+	synonymous_variant ; metS ; c.1953A>G ; p.Val651Val ; 1953/1995 ; 1953/1995 ; 651/664 ;	synonymous_variant ; metS ; c.1953A>G ; p.Val651Val ; 1953/1995 ; 1953/1995 ; 651/664 ;	upstream_gene_variant ; abrB ; c.-2447T>C ; . ; . ; . ; . ;	upstream_gene_variant ; dayD ; c.-121A>G ; . ; . ; . ; . ;	upstream_gene_variant ; yabE ; c.-1044A>G ; . ; . ; . ; . ;	upstream_gene_variant ; rnmV ; c.-2502A>G ; . ; . ; . ; . ;
NC_000964.3	47631	TAAA	TAAAA	225	hom	120	120	.	.	.	.	.	.	upstream_gene_variant ; abrB ; c.-2497_-2496insT ; . ; . ; . ; . ;	upstream_gene_variant ; dayD ; c.-72_-71insA ; . ; . ; . ; . ;	upstream_gene_variant ; yabE ; c.-995_-994insA ; . ; . ; . ; . ;	upstream_gene_variant ; rnmV ; c.-2453_-2452insA ; . ; . ; . ; . ;	upstream_gene_variant ; rsmA ; c.-3006_-3005insA ; . ; . ; . ; . ;
NC_000964.3	47720	T	A	225	hom	122	122	dayD	gene-BSU_00390	47706	48473	+	synonymous_variant ; dayD ; c.15T>A ; p.Thr5Thr ; 15/768 ; 15/768 ; 5/255 ;	synonymous_variant ; dayD ; c.15T>A ; p.Thr5Thr ; 15/768 ; 15/768 ; 5/255 ;	upstream_gene_variant ; abrB ; c.-2582A>T ; . ; . ; . ; . ;	upstream_gene_variant ; yabE ; c.-909T>A ; . ; . ; . ; . ;	upstream_gene_variant ; rnmV ; c.-2367T>A ; . ; . ; . ; . ;	upstream_gene_variant ; rsmA ; c.-2920T>A ; . ; . ; . ; . ;
NC_000964.3	48044	T	A	225	hom	191	191	dayD	gene-BSU_00390	47706	48473	+	missense_variant ; dayD ; c.339T>A ; p.Asn113Lys ; 339/768 ; 339/768 ; 113/255 ;	missense_variant ; dayD ; c.339T>A ; p.Asn113Lys ; 339/768 ; 339/768 ; 113/255 ;	upstream_gene_variant ; abrB ; c.-2906A>T ; . ; . ; . ; . ;	upstream_gene_variant ; yabE ; c.-585T>A ; . ; . ; . ; . ;	upstream_gene_variant ; rnmV ; c.-2043T>A ; . ; . ; . ; . ;	upstream_gene_variant ; rsmA ; c.-2596T>A ; . ; . ; . ; . ;
NC_000964.3	48428	T	G	225	hom	73	73	dayD	gene-BSU_00390	47706	48473	+	synonymous_variant ; dayD ; c.723T>G ; p.Ala241Ala ; 723/768 ; 723/768 ; 241/255 ;	synonymous_variant ; dayD ; c.723T>G ; p.Ala241Ala ; 723/768 ; 723/768 ; 241/255 ;	upstream_gene_variant ; abrB ; c.-3290A>C ; . ; . ; . ; . ;	upstream_gene_variant ; yabE ; c.-201T>G ; . ; . ; . ; . ;	upstream_gene_variant ; rnmV ; c.-1659T>G ; . ; . ; . ; . ;	upstream_gene_variant ; rsmA ; c.-2212T>G ; . ; . ; . ; . ;
NC_000964.3	48431	C	A	225	hom	72	72	dayD	gene-BSU_00390	47706	48473	+	synonymous_variant ; dayD ; c.726C>A ; p.Ser242Ser ; 726/768 ; 726/768 ; 242/255 ;	synonymous_variant ; dayD ; c.726C>A ; p.Ser242Ser ; 726/768 ; 726/768 ; 242/255 ;	upstream_gene_variant ; abrB ; c.-3293G>T ; . ; . ; . ; . ;	upstream_gene_variant ; yabE ; c.-198C>A ; . ; . ; . ; . ;	upstream_gene_variant ; rnmV ; c.-1656C>A ; . ; . ; . ; . ;	upstream_gene_variant ; rsmA ; c.-2209C>A ; . ; . ; . ; . ;
NC_000964.3	48616	G	A	225	hom	61	61	.	.	.	.	.	.	upstream_gene_variant ; abrB ; c.-3478C>T ; . ; . ; . ; . ;	upstream_gene_variant ; yabE ; c.-13G>A ; . ; . ; . ; . ;	upstream_gene_variant ; rnmV ; c.-1471G>A ; . ; . ; . ; . ;	upstream_gene_variant ; rsmA ; c.-2024G>A ; . ; . ; . ; . ;	upstream_gene_variant ; prtG ; c.-3064G>A ; . ; . ; . ; . ;
NC_000964.3	49039	G	A	228	hom	484	483	yabE	gene-BSU_00400	48629	49942	+	synonymous_variant ; yabE ; c.411G>A ; p.Thr137Thr ; 411/1314 ; 411/1314 ; 137/437 ;	synonymous_variant ; yabE ; c.411G>A ; p.Thr137Thr ; 411/1314 ; 411/1314 ; 137/437 ;	upstream_gene_variant ; abrB ; c.-3901C>T ; . ; . ; . ; . ;	upstream_gene_variant ; rnmV ; c.-1048G>A ; . ; . ; . ; . ;	upstream_gene_variant ; rsmA ; c.-1601G>A ; . ; . ; . ; . ;	upstream_gene_variant ; prtG ; c.-2641G>A ; . ; . ; . ; . ;
NC_000964.3	49154	A	C	225	hom	421	421	yabE	gene-BSU_00400	48629	49942	+	missense_variant ; yabE ; c.526A>C ; p.Ile176Leu ; 526/1314 ; 526/1314 ; 176/437 ;	missense_variant ; yabE ; c.526A>C ; p.Ile176Leu ; 526/1314 ; 526/1314 ; 176/437 ;	upstream_gene_variant ; abrB ; c.-4016T>G ; . ; . ; . ; . ;	upstream_gene_variant ; rnmV ; c.-933A>C ; . ; . ; . ; . ;	upstream_gene_variant ; rsmA ; c.-1486A>C ; . ; . ; . ; . ;	upstream_gene_variant ; prtG ; c.-2526A>C ; . ; . ; . ; . ;
NC_000964.3	49589	T	G	225	hom	486	486	yabE	gene-BSU_00400	48629	49942	+	missense_variant ; yabE ; c.961T>G ; p.Phe321Val ; 961/1314 ; 961/1314 ; 321/437 ;	missense_variant ; yabE ; c.961T>G ; p.Phe321Val ; 961/1314 ; 961/1314 ; 321/437 ;	upstream_gene_variant ; abrB ; c.-4451A>C ; . ; . ; . ; . ;	upstream_gene_variant ; rnmV ; c.-498T>G ; . ; . ; . ; . ;	upstream_gene_variant ; rsmA ; c.-1051T>G ; . ; . ; . ; . ;	upstream_gene_variant ; prtG ; c.-2091T>G ; . ; . ; . ; . ;
NC_000964.3	49825	C	T	228	hom	198	197	yabE	gene-BSU_00400	48629	49942	+	synonymous_variant ; yabE ; c.1197C>T ; p.Ala399Ala ; 1197/1314 ; 1197/1314 ; 399/437 ;	synonymous_variant ; yabE ; c.1197C>T ; p.Ala399Ala ; 1197/1314 ; 1197/1314 ; 399/437 ;	upstream_gene_variant ; abrB ; c.-4687G>A ; . ; . ; . ; . ;	upstream_gene_variant ; rnmV ; c.-262C>T ; . ; . ; . ; . ;	upstream_gene_variant ; rsmA ; c.-815C>T ; . ; . ; . ; . ;	upstream_gene_variant ; prtG ; c.-1855C>T ; . ; . ; . ; . ;
NC_000964.3	50125	C	T	225	hom	119	119	rnmV	gene-BSU_00410	50087	50647	+	synonymous_variant ; rnmV ; c.39C>T ; p.Asp13Asp ; 39/561 ; 39/561 ; 13/186 ;	synonymous_variant ; rnmV ; c.39C>T ; p.Asp13Asp ; 39/561 ; 39/561 ; 13/186 ;	upstream_gene_variant ; abrB ; c.-4987G>A ; . ; . ; . ; . ;	upstream_gene_variant ; rsmA ; c.-515C>T ; . ; . ; . ; . ;	upstream_gene_variant ; prtG ; c.-1555C>T ; . ; . ; . ; . ;	upstream_gene_variant ; veg ; c.-2638C>T ; . ; . ; . ; . ;
NC_000964.3	50230	G	C	225	hom	157	157	rnmV	gene-BSU_00410	50087	50647	+	synonymous_variant ; rnmV ; c.144G>C ; p.Thr48Thr ; 144/561 ; 144/561 ; 48/186 ;	synonymous_variant ; rnmV ; c.144G>C ; p.Thr48Thr ; 144/561 ; 144/561 ; 48/186 ;	upstream_gene_variant ; rsmA ; c.-410G>C ; . ; . ; . ; . ;	upstream_gene_variant ; prtG ; c.-1450G>C ; . ; . ; . ; . ;	upstream_gene_variant ; veg ; c.-2533G>C ; . ; . ; . ; . ;	upstream_gene_variant ; sspF ; c.-2953G>C ; . ; . ; . ; . ;
NC_000964.3	50243	A	G	225	hom	159	159	rnmV	gene-BSU_00410	50087	50647	+	missense_variant ; rnmV ; c.157A>G ; p.Ile53Val ; 157/561 ; 157/561 ; 53/186 ;	missense_variant ; rnmV ; c.157A>G ; p.Ile53Val ; 157/561 ; 157/561 ; 53/186 ;	upstream_gene_variant ; rsmA ; c.-397A>G ; . ; . ; . ; . ;	upstream_gene_variant ; prtG ; c.-1437A>G ; . ; . ; . ; . ;	upstream_gene_variant ; veg ; c.-2520A>G ; . ; . ; . ; . ;	upstream_gene_variant ; sspF ; c.-2940A>G ; . ; . ; . ; . ;
NC_000964.3	50302	A	G	225	hom	186	186	rnmV	gene-BSU_00410	50087	50647	+	synonymous_variant ; rnmV ; c.216A>G ; p.Val72Val ; 216/561 ; 216/561 ; 72/186 ;	synonymous_variant ; rnmV ; c.216A>G ; p.Val72Val ; 216/561 ; 216/561 ; 72/186 ;	upstream_gene_variant ; rsmA ; c.-338A>G ; . ; . ; . ; . ;	upstream_gene_variant ; prtG ; c.-1378A>G ; . ; . ; . ; . ;	upstream_gene_variant ; veg ; c.-2461A>G ; . ; . ; . ; . ;	upstream_gene_variant ; sspF ; c.-2881A>G ; . ; . ; . ; . ;
NC_000964.3	50488	G	A	225	hom	206	206	rnmV	gene-BSU_00410	50087	50647	+	synonymous_variant ; rnmV ; c.402G>A ; p.Gly134Gly ; 402/561 ; 402/561 ; 134/186 ;	synonymous_variant ; rnmV ; c.402G>A ; p.Gly134Gly ; 402/561 ; 402/561 ; 134/186 ;	upstream_gene_variant ; rsmA ; c.-152G>A ; . ; . ; . ; . ;	upstream_gene_variant ; prtG ; c.-1192G>A ; . ; . ; . ; . ;	upstream_gene_variant ; veg ; c.-2275G>A ; . ; . ; . ; . ;	upstream_gene_variant ; sspF ; c.-2695G>A ; . ; . ; . ; . ;
NC_000964.3	50501	T	C	225	hom	199	199	rnmV	gene-BSU_00410	50087	50647	+	missense_variant ; rnmV ; c.415T>C ; p.Cys139Arg ; 415/561 ; 415/561 ; 139/186 ;	missense_variant ; rnmV ; c.415T>C ; p.Cys139Arg ; 415/561 ; 415/561 ; 139/186 ;	upstream_gene_variant ; rsmA ; c.-139T>C ; . ; . ; . ; . ;	upstream_gene_variant ; prtG ; c.-1179T>C ; . ; . ; . ; . ;	upstream_gene_variant ; veg ; c.-2262T>C ; . ; . ; . ; . ;	upstream_gene_variant ; sspF ; c.-2682T>C ; . ; . ; . ; . ;
NC_000964.3	50780	G	T	225	hom	126	126	rsmA	gene-BSU_00420	50640	51518	+	synonymous_variant ; rsmA ; c.141G>T ; p.Thr47Thr ; 141/879 ; 141/879 ; 47/292 ;	synonymous_variant ; rsmA ; c.141G>T ; p.Thr47Thr ; 141/879 ; 141/879 ; 47/292 ;	upstream_gene_variant ; prtG ; c.-900G>T ; . ; . ; . ; . ;	upstream_gene_variant ; veg ; c.-1983G>T ; . ; . ; . ; . ;	upstream_gene_variant ; sspF ; c.-2403G>T ; . ; . ; . ; . ;	upstream_gene_variant ; ispE ; c.-2736G>T ; . ; . ; . ; . ;
NC_000964.3	50876	C	T	225	hom	181	181	rsmA	gene-BSU_00420	50640	51518	+	synonymous_variant ; rsmA ; c.237C>T ; p.Asp79Asp ; 237/879 ; 237/879 ; 79/292 ;	synonymous_variant ; rsmA ; c.237C>T ; p.Asp79Asp ; 237/879 ; 237/879 ; 79/292 ;	upstream_gene_variant ; prtG ; c.-804C>T ; . ; . ; . ; . ;	upstream_gene_variant ; veg ; c.-1887C>T ; . ; . ; . ; . ;	upstream_gene_variant ; sspF ; c.-2307C>T ; . ; . ; . ; . ;	upstream_gene_variant ; ispE ; c.-2640C>T ; . ; . ; . ; . ;
NC_000964.3	50921	A	C	225	hom	185	185	rsmA	gene-BSU_00420	50640	51518	+	missense_variant ; rsmA ; c.282A>C ; p.Glu94Asp ; 282/879 ; 282/879 ; 94/292 ;	missense_variant ; rsmA ; c.282A>C ; p.Glu94Asp ; 282/879 ; 282/879 ; 94/292 ;	upstream_gene_variant ; prtG ; c.-759A>C ; . ; . ; . ; . ;	upstream_gene_variant ; veg ; c.-1842A>C ; . ; . ; . ; . ;	upstream_gene_variant ; sspF ; c.-2262A>C ; . ; . ; . ; . ;	upstream_gene_variant ; ispE ; c.-2595A>C ; . ; . ; . ; . ;
NC_000964.3	50933	C	T	225	hom	183	183	rsmA	gene-BSU_00420	50640	51518	+	synonymous_variant ; rsmA ; c.294C>T ; p.Val98Val ; 294/879 ; 294/879 ; 98/292 ;	synonymous_variant ; rsmA ; c.294C>T ; p.Val98Val ; 294/879 ; 294/879 ; 98/292 ;	upstream_gene_variant ; prtG ; c.-747C>T ; . ; . ; . ; . ;	upstream_gene_variant ; veg ; c.-1830C>T ; . ; . ; . ; . ;	upstream_gene_variant ; sspF ; c.-2250C>T ; . ; . ; . ; . ;	upstream_gene_variant ; ispE ; c.-2583C>T ; . ; . ; . ; . ;
NC_000964.3	50942	G	T	225	hom	175	175	rsmA	gene-BSU_00420	50640	51518	+	missense_variant ; rsmA ; c.303G>T ; p.Gln101His ; 303/879 ; 303/879 ; 101/292 ;	missense_variant ; rsmA ; c.303G>T ; p.Gln101His ; 303/879 ; 303/879 ; 101/292 ;	upstream_gene_variant ; prtG ; c.-738G>T ; . ; . ; . ; . ;	upstream_gene_variant ; veg ; c.-1821G>T ; . ; . ; . ; . ;	upstream_gene_variant ; sspF ; c.-2241G>T ; . ; . ; . ; . ;	upstream_gene_variant ; ispE ; c.-2574G>T ; . ; . ; . ; . ;
NC_000964.3	50945	C	T	225	hom	176	176	rsmA	gene-BSU_00420	50640	51518	+	synonymous_variant ; rsmA ; c.306C>T ; p.Asp102Asp ; 306/879 ; 306/879 ; 102/292 ;	synonymous_variant ; rsmA ; c.306C>T ; p.Asp102Asp ; 306/879 ; 306/879 ; 102/292 ;	upstream_gene_variant ; prtG ; c.-735C>T ; . ; . ; . ; . ;	upstream_gene_variant ; veg ; c.-1818C>T ; . ; . ; . ; . ;	upstream_gene_variant ; sspF ; c.-2238C>T ; . ; . ; . ; . ;	upstream_gene_variant ; ispE ; c.-2571C>T ; . ; . ; . ; . ;
NC_000964.3	50969	A	G	225	hom	182	182	rsmA	gene-BSU_00420	50640	51518	+	synonymous_variant ; rsmA ; c.330A>G ; p.Ser110Ser ; 330/879 ; 330/879 ; 110/292 ;	synonymous_variant ; rsmA ; c.330A>G ; p.Ser110Ser ; 330/879 ; 330/879 ; 110/292 ;	upstream_gene_variant ; prtG ; c.-711A>G ; . ; . ; . ; . ;	upstream_gene_variant ; veg ; c.-1794A>G ; . ; . ; . ; . ;	upstream_gene_variant ; sspF ; c.-2214A>G ; . ; . ; . ; . ;	upstream_gene_variant ; ispE ; c.-2547A>G ; . ; . ; . ; . ;
NC_000964.3	50996	T	C	225	hom	171	171	rsmA	gene-BSU_00420	50640	51518	+	synonymous_variant ; rsmA ; c.357T>C ; p.Cys119Cys ; 357/879 ; 357/879 ; 119/292 ;	synonymous_variant ; rsmA ; c.357T>C ; p.Cys119Cys ; 357/879 ; 357/879 ; 119/292 ;	upstream_gene_variant ; prtG ; c.-684T>C ; . ; . ; . ; . ;	upstream_gene_variant ; veg ; c.-1767T>C ; . ; . ; . ; . ;	upstream_gene_variant ; sspF ; c.-2187T>C ; . ; . ; . ; . ;	upstream_gene_variant ; ispE ; c.-2520T>C ; . ; . ; . ; . ;
NC_000964.3	51209	C	T	225	hom	126	126	rsmA	gene-BSU_00420	50640	51518	+	synonymous_variant ; rsmA ; c.570C>T ; p.Val190Val ; 570/879 ; 570/879 ; 190/292 ;	synonymous_variant ; rsmA ; c.570C>T ; p.Val190Val ; 570/879 ; 570/879 ; 190/292 ;	upstream_gene_variant ; prtG ; c.-471C>T ; . ; . ; . ; . ;	upstream_gene_variant ; veg ; c.-1554C>T ; . ; . ; . ; . ;	upstream_gene_variant ; sspF ; c.-1974C>T ; . ; . ; . ; . ;	upstream_gene_variant ; ispE ; c.-2307C>T ; . ; . ; . ; . ;
NC_000964.3	51257	T	C	225	hom	130	130	rsmA	gene-BSU_00420	50640	51518	+	synonymous_variant ; rsmA ; c.618T>C ; p.Ile206Ile ; 618/879 ; 618/879 ; 206/292 ;	synonymous_variant ; rsmA ; c.618T>C ; p.Ile206Ile ; 618/879 ; 618/879 ; 206/292 ;	upstream_gene_variant ; prtG ; c.-423T>C ; . ; . ; . ; . ;	upstream_gene_variant ; veg ; c.-1506T>C ; . ; . ; . ; . ;	upstream_gene_variant ; sspF ; c.-1926T>C ; . ; . ; . ; . ;	upstream_gene_variant ; ispE ; c.-2259T>C ; . ; . ; . ; . ;
NC_000964.3	51305	C	T	225	hom	121	121	rsmA	gene-BSU_00420	50640	51518	+	synonymous_variant ; rsmA ; c.666C>T ; p.Ser222Ser ; 666/879 ; 666/879 ; 222/292 ;	synonymous_variant ; rsmA ; c.666C>T ; p.Ser222Ser ; 666/879 ; 666/879 ; 222/292 ;	upstream_gene_variant ; prtG ; c.-375C>T ; . ; . ; . ; . ;	upstream_gene_variant ; veg ; c.-1458C>T ; . ; . ; . ; . ;	upstream_gene_variant ; sspF ; c.-1878C>T ; . ; . ; . ; . ;	upstream_gene_variant ; ispE ; c.-2211C>T ; . ; . ; . ; . ;
NC_000964.3	51392	A	G	225	hom	108	108	rsmA	gene-BSU_00420	50640	51518	+	synonymous_variant ; rsmA ; c.753A>G ; p.Lys251Lys ; 753/879 ; 753/879 ; 251/292 ;	synonymous_variant ; rsmA ; c.753A>G ; p.Lys251Lys ; 753/879 ; 753/879 ; 251/292 ;	upstream_gene_variant ; prtG ; c.-288A>G ; . ; . ; . ; . ;	upstream_gene_variant ; veg ; c.-1371A>G ; . ; . ; . ; . ;	upstream_gene_variant ; sspF ; c.-1791A>G ; . ; . ; . ; . ;	upstream_gene_variant ; ispE ; c.-2124A>G ; . ; . ; . ; . ;
NC_000964.3	51395	A	G	225	hom	108	108	rsmA	gene-BSU_00420	50640	51518	+	synonymous_variant ; rsmA ; c.756A>G ; p.Ala252Ala ; 756/879 ; 756/879 ; 252/292 ;	synonymous_variant ; rsmA ; c.756A>G ; p.Ala252Ala ; 756/879 ; 756/879 ; 252/292 ;	upstream_gene_variant ; prtG ; c.-285A>G ; . ; . ; . ; . ;	upstream_gene_variant ; veg ; c.-1368A>G ; . ; . ; . ; . ;	upstream_gene_variant ; sspF ; c.-1788A>G ; . ; . ; . ; . ;	upstream_gene_variant ; ispE ; c.-2121A>G ; . ; . ; . ; . ;
NC_000964.3	51413	A	G	225	hom	112	112	rsmA	gene-BSU_00420	50640	51518	+	synonymous_variant ; rsmA ; c.774A>G ; p.Glu258Glu ; 774/879 ; 774/879 ; 258/292 ;	synonymous_variant ; rsmA ; c.774A>G ; p.Glu258Glu ; 774/879 ; 774/879 ; 258/292 ;	upstream_gene_variant ; prtG ; c.-267A>G ; . ; . ; . ; . ;	upstream_gene_variant ; veg ; c.-1350A>G ; . ; . ; . ; . ;	upstream_gene_variant ; sspF ; c.-1770A>G ; . ; . ; . ; . ;	upstream_gene_variant ; ispE ; c.-2103A>G ; . ; . ; . ; . ;
NC_000964.3	51423	G	A	225	hom	112	112	rsmA	gene-BSU_00420	50640	51518	+	missense_variant ; rsmA ; c.784G>A ; p.Glu262Lys ; 784/879 ; 784/879 ; 262/292 ;	missense_variant ; rsmA ; c.784G>A ; p.Glu262Lys ; 784/879 ; 784/879 ; 262/292 ;	upstream_gene_variant ; prtG ; c.-257G>A ; . ; . ; . ; . ;	upstream_gene_variant ; veg ; c.-1340G>A ; . ; . ; . ; . ;	upstream_gene_variant ; sspF ; c.-1760G>A ; . ; . ; . ; . ;	upstream_gene_variant ; ispE ; c.-2093G>A ; . ; . ; . ; . ;
NC_000964.3	51476	A	G	225	hom	115	115	rsmA	gene-BSU_00420	50640	51518	+	synonymous_variant ; rsmA ; c.837A>G ; p.Glu279Glu ; 837/879 ; 837/879 ; 279/292 ;	synonymous_variant ; rsmA ; c.837A>G ; p.Glu279Glu ; 837/879 ; 837/879 ; 279/292 ;	upstream_gene_variant ; prtG ; c.-204A>G ; . ; . ; . ; . ;	upstream_gene_variant ; veg ; c.-1287A>G ; . ; . ; . ; . ;	upstream_gene_variant ; sspF ; c.-1707A>G ; . ; . ; . ; . ;	upstream_gene_variant ; ispE ; c.-2040A>G ; . ; . ; . ; . ;
NC_000964.3	51593	GAAAAAA	GAAAAA	138	hom	68	68	.	.	.	.	.	.	upstream_gene_variant ; prtG ; c.-81delA ; . ; . ; . ; . ;	upstream_gene_variant ; veg ; c.-1164delA ; . ; . ; . ; . ;	upstream_gene_variant ; sspF ; c.-1584delA ; . ; . ; . ; . ;	upstream_gene_variant ; ispE ; c.-1917delA ; . ; . ; . ; . ;	upstream_gene_variant ; purR ; c.-2842delA ; . ; . ; . ; . ;
NC_000964.3	52040	T	C	225	hom	320	320	prtG	gene-BSU_00430	51680	52552	+	synonymous_variant ; prtG ; c.361T>C ; p.Leu121Leu ; 361/873 ; 361/873 ; 121/290 ;	synonymous_variant ; prtG ; c.361T>C ; p.Leu121Leu ; 361/873 ; 361/873 ; 121/290 ;	upstream_gene_variant ; veg ; c.-723T>C ; . ; . ; . ; . ;	upstream_gene_variant ; sspF ; c.-1143T>C ; . ; . ; . ; . ;	upstream_gene_variant ; ispE ; c.-1476T>C ; . ; . ; . ; . ;	upstream_gene_variant ; purR ; c.-2401T>C ; . ; . ; . ; . ;
NC_000964.3	52131	T	A	225	hom	275	275	prtG	gene-BSU_00430	51680	52552	+	missense_variant ; prtG ; c.452T>A ; p.Val151Glu ; 452/873 ; 452/873 ; 151/290 ;	missense_variant ; prtG ; c.452T>A ; p.Val151Glu ; 452/873 ; 452/873 ; 151/290 ;	upstream_gene_variant ; veg ; c.-632T>A ; . ; . ; . ; . ;	upstream_gene_variant ; sspF ; c.-1052T>A ; . ; . ; . ; . ;	upstream_gene_variant ; ispE ; c.-1385T>A ; . ; . ; . ; . ;	upstream_gene_variant ; purR ; c.-2310T>A ; . ; . ; . ; . ;
NC_000964.3	52156	C	T	225	hom	256	256	prtG	gene-BSU_00430	51680	52552	+	synonymous_variant ; prtG ; c.477C>T ; p.Asp159Asp ; 477/873 ; 477/873 ; 159/290 ;	synonymous_variant ; prtG ; c.477C>T ; p.Asp159Asp ; 477/873 ; 477/873 ; 159/290 ;	upstream_gene_variant ; veg ; c.-607C>T ; . ; . ; . ; . ;	upstream_gene_variant ; sspF ; c.-1027C>T ; . ; . ; . ; . ;	upstream_gene_variant ; ispE ; c.-1360C>T ; . ; . ; . ; . ;	upstream_gene_variant ; purR ; c.-2285C>T ; . ; . ; . ; . ;
NC_000964.3	52186	C	T	225	hom	210	210	prtG	gene-BSU_00430	51680	52552	+	synonymous_variant ; prtG ; c.507C>T ; p.Tyr169Tyr ; 507/873 ; 507/873 ; 169/290 ;	synonymous_variant ; prtG ; c.507C>T ; p.Tyr169Tyr ; 507/873 ; 507/873 ; 169/290 ;	upstream_gene_variant ; veg ; c.-577C>T ; . ; . ; . ; . ;	upstream_gene_variant ; sspF ; c.-997C>T ; . ; . ; . ; . ;	upstream_gene_variant ; ispE ; c.-1330C>T ; . ; . ; . ; . ;	upstream_gene_variant ; purR ; c.-2255C>T ; . ; . ; . ; . ;
NC_000964.3	52204	T	C	225	hom	197	197	prtG	gene-BSU_00430	51680	52552	+	synonymous_variant ; prtG ; c.525T>C ; p.Gly175Gly ; 525/873 ; 525/873 ; 175/290 ;	synonymous_variant ; prtG ; c.525T>C ; p.Gly175Gly ; 525/873 ; 525/873 ; 175/290 ;	upstream_gene_variant ; veg ; c.-559T>C ; . ; . ; . ; . ;	upstream_gene_variant ; sspF ; c.-979T>C ; . ; . ; . ; . ;	upstream_gene_variant ; ispE ; c.-1312T>C ; . ; . ; . ; . ;	upstream_gene_variant ; purR ; c.-2237T>C ; . ; . ; . ; . ;
NC_000964.3	52252	A	T	225	hom	150	150	prtG	gene-BSU_00430	51680	52552	+	synonymous_variant ; prtG ; c.573A>T ; p.Thr191Thr ; 573/873 ; 573/873 ; 191/290 ;	synonymous_variant ; prtG ; c.573A>T ; p.Thr191Thr ; 573/873 ; 573/873 ; 191/290 ;	upstream_gene_variant ; veg ; c.-511A>T ; . ; . ; . ; . ;	upstream_gene_variant ; sspF ; c.-931A>T ; . ; . ; . ; . ;	upstream_gene_variant ; ispE ; c.-1264A>T ; . ; . ; . ; . ;	upstream_gene_variant ; purR ; c.-2189A>T ; . ; . ; . ; . ;
NC_000964.3	53078	A	G	225	hom	70	70	.	.	.	.	.	.	upstream_gene_variant ; sspF ; c.-105A>G ; . ; . ; . ; . ;	upstream_gene_variant ; ispE ; c.-438A>G ; . ; . ; . ; . ;	upstream_gene_variant ; purR ; c.-1363A>G ; . ; . ; . ; . ;	upstream_gene_variant ; ridA ; c.-2217A>G ; . ; . ; . ; . ;	upstream_gene_variant ; spoVG ; c.-2788A>G ; . ; . ; . ; . ;
NC_000964.3	53085	T	A	225	hom	68	68	.	.	.	.	.	.	upstream_gene_variant ; sspF ; c.-98T>A ; . ; . ; . ; . ;	upstream_gene_variant ; ispE ; c.-431T>A ; . ; . ; . ; . ;	upstream_gene_variant ; purR ; c.-1356T>A ; . ; . ; . ; . ;	upstream_gene_variant ; ridA ; c.-2210T>A ; . ; . ; . ; . ;	upstream_gene_variant ; spoVG ; c.-2781T>A ; . ; . ; . ; . ;
NC_000964.3	53172	A	G	225	hom	103	103	.	.	.	.	.	.	upstream_gene_variant ; sspF ; c.-11A>G ; . ; . ; . ; . ;	upstream_gene_variant ; ispE ; c.-344A>G ; . ; . ; . ; . ;	upstream_gene_variant ; purR ; c.-1269A>G ; . ; . ; . ; . ;	upstream_gene_variant ; ridA ; c.-2123A>G ; . ; . ; . ; . ;	upstream_gene_variant ; spoVG ; c.-2694A>G ; . ; . ; . ; . ;
NC_000964.3	53230	G	T	225	hom	119	119	sspF	gene-BSU_00450	53183	53368	+	synonymous_variant ; sspF ; c.48G>T ; p.Leu16Leu ; 48/186 ; 48/186 ; 16/61 ;	synonymous_variant ; sspF ; c.48G>T ; p.Leu16Leu ; 48/186 ; 48/186 ; 16/61 ;	upstream_gene_variant ; ispE ; c.-286G>T ; . ; . ; . ; . ;	upstream_gene_variant ; purR ; c.-1211G>T ; . ; . ; . ; . ;	upstream_gene_variant ; ridA ; c.-2065G>T ; . ; . ; . ; . ;	upstream_gene_variant ; spoVG ; c.-2636G>T ; . ; . ; . ; . ;
NC_000964.3	53269	A	C	225	hom	125	125	sspF	gene-BSU_00450	53183	53368	+	synonymous_variant ; sspF ; c.87A>C ; p.Gly29Gly ; 87/186 ; 87/186 ; 29/61 ;	synonymous_variant ; sspF ; c.87A>C ; p.Gly29Gly ; 87/186 ; 87/186 ; 29/61 ;	upstream_gene_variant ; ispE ; c.-247A>C ; . ; . ; . ; . ;	upstream_gene_variant ; purR ; c.-1172A>C ; . ; . ; . ; . ;	upstream_gene_variant ; ridA ; c.-2026A>C ; . ; . ; . ; . ;	upstream_gene_variant ; spoVG ; c.-2597A>C ; . ; . ; . ; . ;
NC_000964.3	53278	T	C	225	hom	124	124	sspF	gene-BSU_00450	53183	53368	+	synonymous_variant ; sspF ; c.96T>C ; p.Gly32Gly ; 96/186 ; 96/186 ; 32/61 ;	synonymous_variant ; sspF ; c.96T>C ; p.Gly32Gly ; 96/186 ; 96/186 ; 32/61 ;	upstream_gene_variant ; ispE ; c.-238T>C ; . ; . ; . ; . ;	upstream_gene_variant ; purR ; c.-1163T>C ; . ; . ; . ; . ;	upstream_gene_variant ; ridA ; c.-2017T>C ; . ; . ; . ; . ;	upstream_gene_variant ; spoVG ; c.-2588T>C ; . ; . ; . ; . ;
NC_000964.3	53290	C	T	225	hom	125	125	sspF	gene-BSU_00450	53183	53368	+	synonymous_variant ; sspF ; c.108C>T ; p.Ala36Ala ; 108/186 ; 108/186 ; 36/61 ;	synonymous_variant ; sspF ; c.108C>T ; p.Ala36Ala ; 108/186 ; 108/186 ; 36/61 ;	upstream_gene_variant ; ispE ; c.-226C>T ; . ; . ; . ; . ;	upstream_gene_variant ; purR ; c.-1151C>T ; . ; . ; . ; . ;	upstream_gene_variant ; ridA ; c.-2005C>T ; . ; . ; . ; . ;	upstream_gene_variant ; spoVG ; c.-2576C>T ; . ; . ; . ; . ;
NC_000964.3	53311	G	A	225	hom	128	128	sspF	gene-BSU_00450	53183	53368	+	synonymous_variant ; sspF ; c.129G>A ; p.Val43Val ; 129/186 ; 129/186 ; 43/61 ;	synonymous_variant ; sspF ; c.129G>A ; p.Val43Val ; 129/186 ; 129/186 ; 43/61 ;	upstream_gene_variant ; ispE ; c.-205G>A ; . ; . ; . ; . ;	upstream_gene_variant ; purR ; c.-1130G>A ; . ; . ; . ; . ;	upstream_gene_variant ; ridA ; c.-1984G>A ; . ; . ; . ; . ;	upstream_gene_variant ; spoVG ; c.-2555G>A ; . ; . ; . ; . ;
NC_000964.3	53317	T	C	225	hom	128	128	sspF	gene-BSU_00450	53183	53368	+	synonymous_variant ; sspF ; c.135T>C ; p.Arg45Arg ; 135/186 ; 135/186 ; 45/61 ;	synonymous_variant ; sspF ; c.135T>C ; p.Arg45Arg ; 135/186 ; 135/186 ; 45/61 ;	upstream_gene_variant ; ispE ; c.-199T>C ; . ; . ; . ; . ;	upstream_gene_variant ; purR ; c.-1124T>C ; . ; . ; . ; . ;	upstream_gene_variant ; ridA ; c.-1978T>C ; . ; . ; . ; . ;	upstream_gene_variant ; spoVG ; c.-2549T>C ; . ; . ; . ; . ;
NC_000964.3	53323	T	A	225	hom	129	129	sspF	gene-BSU_00450	53183	53368	+	synonymous_variant ; sspF ; c.141T>A ; p.Ile47Ile ; 141/186 ; 141/186 ; 47/61 ;	synonymous_variant ; sspF ; c.141T>A ; p.Ile47Ile ; 141/186 ; 141/186 ; 47/61 ;	upstream_gene_variant ; ispE ; c.-193T>A ; . ; . ; . ; . ;	upstream_gene_variant ; purR ; c.-1118T>A ; . ; . ; . ; . ;	upstream_gene_variant ; ridA ; c.-1972T>A ; . ; . ; . ; . ;	upstream_gene_variant ; spoVG ; c.-2543T>A ; . ; . ; . ; . ;
NC_000964.3	54065	C	T	225	hom	288	288	ispE	gene-BSU_00460	53516	54385	+	synonymous_variant ; ispE ; c.550C>T ; p.Leu184Leu ; 550/870 ; 550/870 ; 184/289 ;	synonymous_variant ; ispE ; c.550C>T ; p.Leu184Leu ; 550/870 ; 550/870 ; 184/289 ;	upstream_gene_variant ; purR ; c.-376C>T ; . ; . ; . ; . ;	upstream_gene_variant ; ridA ; c.-1230C>T ; . ; . ; . ; . ;	upstream_gene_variant ; spoVG ; c.-1801C>T ; . ; . ; . ; . ;	upstream_gene_variant ; glmU ; c.-2287C>T ; . ; . ; . ; . ;
NC_000964.3	54271	G	A	225	hom	284	284	ispE	gene-BSU_00460	53516	54385	+	synonymous_variant ; ispE ; c.756G>A ; p.Val252Val ; 756/870 ; 756/870 ; 252/289 ;	synonymous_variant ; ispE ; c.756G>A ; p.Val252Val ; 756/870 ; 756/870 ; 252/289 ;	upstream_gene_variant ; purR ; c.-170G>A ; . ; . ; . ; . ;	upstream_gene_variant ; ridA ; c.-1024G>A ; . ; . ; . ; . ;	upstream_gene_variant ; spoVG ; c.-1595G>A ; . ; . ; . ; . ;	upstream_gene_variant ; glmU ; c.-2081G>A ; . ; . ; . ; . ;
NC_000964.3	54435	G	A	225	hom	150	150	.	.	.	.	.	.	upstream_gene_variant ; purR ; c.-6G>A ; . ; . ; . ; . ;	upstream_gene_variant ; ridA ; c.-860G>A ; . ; . ; . ; . ;	upstream_gene_variant ; spoVG ; c.-1431G>A ; . ; . ; . ; . ;	upstream_gene_variant ; glmU ; c.-1917G>A ; . ; . ; . ; . ;	upstream_gene_variant ; prs ; c.-3310G>A ; . ; . ; . ; . ;
NC_000964.3	54824	G	A	225	hom	262	262	purR	gene-BSU_00470	54441	55298	+	synonymous_variant ; purR ; c.384G>A ; p.Glu128Glu ; 384/858 ; 384/858 ; 128/285 ;	synonymous_variant ; purR ; c.384G>A ; p.Glu128Glu ; 384/858 ; 384/858 ; 128/285 ;	upstream_gene_variant ; ridA ; c.-471G>A ; . ; . ; . ; . ;	upstream_gene_variant ; spoVG ; c.-1042G>A ; . ; . ; . ; . ;	upstream_gene_variant ; glmU ; c.-1528G>A ; . ; . ; . ; . ;	upstream_gene_variant ; prs ; c.-2921G>A ; . ; . ; . ; . ;
NC_000964.3	54878	C	T	225	hom	274	274	purR	gene-BSU_00470	54441	55298	+	synonymous_variant ; purR ; c.438C>T ; p.Tyr146Tyr ; 438/858 ; 438/858 ; 146/285 ;	synonymous_variant ; purR ; c.438C>T ; p.Tyr146Tyr ; 438/858 ; 438/858 ; 146/285 ;	upstream_gene_variant ; ridA ; c.-417C>T ; . ; . ; . ; . ;	upstream_gene_variant ; spoVG ; c.-988C>T ; . ; . ; . ; . ;	upstream_gene_variant ; glmU ; c.-1474C>T ; . ; . ; . ; . ;	upstream_gene_variant ; prs ; c.-2867C>T ; . ; . ; . ; . ;
NC_000964.3	55387	C	T	225	hom	123	123	ridA	gene-BSU_00480	55295	55672	+	synonymous_variant ; ridA ; c.93C>T ; p.Gly31Gly ; 93/378 ; 93/378 ; 31/125 ;	synonymous_variant ; ridA ; c.93C>T ; p.Gly31Gly ; 93/378 ; 93/378 ; 31/125 ;	upstream_gene_variant ; spoVG ; c.-479C>T ; . ; . ; . ; . ;	upstream_gene_variant ; glmU ; c.-965C>T ; . ; . ; . ; . ;	upstream_gene_variant ; prs ; c.-2358C>T ; . ; . ; . ; . ;	upstream_gene_variant ; ctc ; c.-3396C>T ; . ; . ; . ; . ;
NC_000964.3	55423	T	C	225	hom	134	134	ridA	gene-BSU_00480	55295	55672	+	synonymous_variant ; ridA ; c.129T>C ; p.Asn43Asn ; 129/378 ; 129/378 ; 43/125 ;	synonymous_variant ; ridA ; c.129T>C ; p.Asn43Asn ; 129/378 ; 129/378 ; 43/125 ;	upstream_gene_variant ; spoVG ; c.-443T>C ; . ; . ; . ; . ;	upstream_gene_variant ; glmU ; c.-929T>C ; . ; . ; . ; . ;	upstream_gene_variant ; prs ; c.-2322T>C ; . ; . ; . ; . ;	upstream_gene_variant ; ctc ; c.-3360T>C ; . ; . ; . ; . ;
NC_000964.3	55576	T	C	225	hom	133	133	ridA	gene-BSU_00480	55295	55672	+	synonymous_variant ; ridA ; c.282T>C ; p.Tyr94Tyr ; 282/378 ; 282/378 ; 94/125 ;	synonymous_variant ; ridA ; c.282T>C ; p.Tyr94Tyr ; 282/378 ; 282/378 ; 94/125 ;	upstream_gene_variant ; spoVG ; c.-290T>C ; . ; . ; . ; . ;	upstream_gene_variant ; glmU ; c.-776T>C ; . ; . ; . ; . ;	upstream_gene_variant ; prs ; c.-2169T>C ; . ; . ; . ; . ;	upstream_gene_variant ; ctc ; c.-3207T>C ; . ; . ; . ; . ;
NC_000964.3	55648	C	T	225	hom	122	122	ridA	gene-BSU_00480	55295	55672	+	synonymous_variant ; ridA ; c.354C>T ; p.Ile118Ile ; 354/378 ; 354/378 ; 118/125 ;	synonymous_variant ; ridA ; c.354C>T ; p.Ile118Ile ; 354/378 ; 354/378 ; 118/125 ;	upstream_gene_variant ; spoVG ; c.-218C>T ; . ; . ; . ; . ;	upstream_gene_variant ; glmU ; c.-704C>T ; . ; . ; . ; . ;	upstream_gene_variant ; prs ; c.-2097C>T ; . ; . ; . ; . ;	upstream_gene_variant ; ctc ; c.-3135C>T ; . ; . ; . ; . ;
NC_000964.3	55695	GCC	GCCC	225	hom	83	83	.	.	.	.	.	.	upstream_gene_variant ; spoVG ; c.-169_-168insC ; . ; . ; . ; . ;	upstream_gene_variant ; glmU ; c.-655_-654insC ; . ; . ; . ; . ;	upstream_gene_variant ; prs ; c.-2048_-2047insC ; . ; . ; . ; . ;	upstream_gene_variant ; ctc ; c.-3086_-3085insC ; . ; . ; . ; . ;	upstream_gene_variant ; pth ; c.-3807_-3806insC ; . ; . ; . ; . ;
NC_000964.3	56046	A	G	225	hom	182	182	spoVG	gene-BSU_00490	55866	56159	+	missense_variant ; spoVG ; c.181A>G ; p.Thr61Ala ; 181/294 ; 181/294 ; 61/97 ;	missense_variant ; spoVG ; c.181A>G ; p.Thr61Ala ; 181/294 ; 181/294 ; 61/97 ;	upstream_gene_variant ; glmU ; c.-306A>G ; . ; . ; . ; . ;	upstream_gene_variant ; prs ; c.-1699A>G ; . ; . ; . ; . ;	upstream_gene_variant ; ctc ; c.-2737A>G ; . ; . ; . ; . ;	upstream_gene_variant ; pth ; c.-3458A>G ; . ; . ; . ; . ;
NC_000964.3	56574	A	G	225	hom	210	210	glmU	gene-BSU_00500	56352	57722	+	missense_variant ; glmU ; c.223A>G ; p.Lys75Glu ; 223/1371 ; 223/1371 ; 75/456 ;	missense_variant ; glmU ; c.223A>G ; p.Lys75Glu ; 223/1371 ; 223/1371 ; 75/456 ;	upstream_gene_variant ; prs ; c.-1171A>G ; . ; . ; . ; . ;	upstream_gene_variant ; ctc ; c.-2209A>G ; . ; . ; . ; . ;	upstream_gene_variant ; pth ; c.-2930A>G ; . ; . ; . ; . ;	upstream_gene_variant ; fin ; c.-3556A>G ; . ; . ; . ; . ;
NC_000964.3	56762	T	C	225	hom	167	167	glmU	gene-BSU_00500	56352	57722	+	synonymous_variant ; glmU ; c.411T>C ; p.Thr137Thr ; 411/1371 ; 411/1371 ; 137/456 ;	synonymous_variant ; glmU ; c.411T>C ; p.Thr137Thr ; 411/1371 ; 411/1371 ; 137/456 ;	upstream_gene_variant ; prs ; c.-983T>C ; . ; . ; . ; . ;	upstream_gene_variant ; ctc ; c.-2021T>C ; . ; . ; . ; . ;	upstream_gene_variant ; pth ; c.-2742T>C ; . ; . ; . ; . ;	upstream_gene_variant ; fin ; c.-3368T>C ; . ; . ; . ; . ;
NC_000964.3	56810	A	C	225	hom	156	156	glmU	gene-BSU_00500	56352	57722	+	synonymous_variant ; glmU ; c.459A>C ; p.Ile153Ile ; 459/1371 ; 459/1371 ; 153/456 ;	synonymous_variant ; glmU ; c.459A>C ; p.Ile153Ile ; 459/1371 ; 459/1371 ; 153/456 ;	upstream_gene_variant ; prs ; c.-935A>C ; . ; . ; . ; . ;	upstream_gene_variant ; ctc ; c.-1973A>C ; . ; . ; . ; . ;	upstream_gene_variant ; pth ; c.-2694A>C ; . ; . ; . ; . ;	upstream_gene_variant ; fin ; c.-3320A>C ; . ; . ; . ; . ;
NC_000964.3	56930	A	C	225	hom	161	161	glmU	gene-BSU_00500	56352	57722	+	synonymous_variant ; glmU ; c.579A>C ; p.Ala193Ala ; 579/1371 ; 579/1371 ; 193/456 ;	synonymous_variant ; glmU ; c.579A>C ; p.Ala193Ala ; 579/1371 ; 579/1371 ; 193/456 ;	upstream_gene_variant ; prs ; c.-815A>C ; . ; . ; . ; . ;	upstream_gene_variant ; ctc ; c.-1853A>C ; . ; . ; . ; . ;	upstream_gene_variant ; pth ; c.-2574A>C ; . ; . ; . ; . ;	upstream_gene_variant ; fin ; c.-3200A>C ; . ; . ; . ; . ;
NC_000964.3	57119	T	C	225	hom	251	251	glmU	gene-BSU_00500	56352	57722	+	synonymous_variant ; glmU ; c.768T>C ; p.Ile256Ile ; 768/1371 ; 768/1371 ; 256/456 ;	synonymous_variant ; glmU ; c.768T>C ; p.Ile256Ile ; 768/1371 ; 768/1371 ; 256/456 ;	upstream_gene_variant ; prs ; c.-626T>C ; . ; . ; . ; . ;	upstream_gene_variant ; ctc ; c.-1664T>C ; . ; . ; . ; . ;	upstream_gene_variant ; pth ; c.-2385T>C ; . ; . ; . ; . ;	upstream_gene_variant ; fin ; c.-3011T>C ; . ; . ; . ; . ;
NC_000964.3	58530	T	A	225	hom	318	318	prs	gene-BSU_00510	57745	58698	+	synonymous_variant ; prs ; c.786T>A ; p.Val262Val ; 786/954 ; 786/954 ; 262/317 ;	synonymous_variant ; prs ; c.786T>A ; p.Val262Val ; 786/954 ; 786/954 ; 262/317 ;	upstream_gene_variant ; ctc ; c.-253T>A ; . ; . ; . ; . ;	upstream_gene_variant ; pth ; c.-974T>A ; . ; . ; . ; . ;	upstream_gene_variant ; fin ; c.-1600T>A ; . ; . ; . ; . ;	upstream_gene_variant ; mfd ; c.-1900T>A ; . ; . ; . ; . ;
NC_000964.3	58581	C	T	225	hom	229	229	prs	gene-BSU_00510	57745	58698	+	synonymous_variant ; prs ; c.837C>T ; p.Ile279Ile ; 837/954 ; 837/954 ; 279/317 ;	synonymous_variant ; prs ; c.837C>T ; p.Ile279Ile ; 837/954 ; 837/954 ; 279/317 ;	upstream_gene_variant ; ctc ; c.-202C>T ; . ; . ; . ; . ;	upstream_gene_variant ; pth ; c.-923C>T ; . ; . ; . ; . ;	upstream_gene_variant ; fin ; c.-1549C>T ; . ; . ; . ; . ;	upstream_gene_variant ; mfd ; c.-1849C>T ; . ; . ; . ; . ;
NC_000964.3	58767	G	T	225	hom	204	204	.	.	.	.	.	.	upstream_gene_variant ; ctc ; c.-16G>T ; . ; . ; . ; . ;	upstream_gene_variant ; pth ; c.-737G>T ; . ; . ; . ; . ;	upstream_gene_variant ; fin ; c.-1363G>T ; . ; . ; . ; . ;	upstream_gene_variant ; mfd ; c.-1663G>T ; . ; . ; . ; . ;	downstream_gene_variant ; ispE ; c.*4382G>T ; . ; . ; . ; . ;
NC_000964.3	58911	C	T	225	hom	311	311	ctc	gene-BSU_00520	58783	59397	+	synonymous_variant ; ctc ; c.129C>T ; p.Asp43Asp ; 129/615 ; 129/615 ; 43/204 ;	synonymous_variant ; ctc ; c.129C>T ; p.Asp43Asp ; 129/615 ; 129/615 ; 43/204 ;	upstream_gene_variant ; pth ; c.-593C>T ; . ; . ; . ; . ;	upstream_gene_variant ; fin ; c.-1219C>T ; . ; . ; . ; . ;	upstream_gene_variant ; mfd ; c.-1519C>T ; . ; . ; . ; . ;	downstream_gene_variant ; ispE ; c.*4526C>T ; . ; . ; . ; . ;
NC_000964.3	59376	T	A	225	hom	279	279	ctc	gene-BSU_00520	58783	59397	+	synonymous_variant ; ctc ; c.594T>A ; p.Pro198Pro ; 594/615 ; 594/615 ; 198/204 ;	synonymous_variant ; ctc ; c.594T>A ; p.Pro198Pro ; 594/615 ; 594/615 ; 198/204 ;	upstream_gene_variant ; pth ; c.-128T>A ; . ; . ; . ; . ;	upstream_gene_variant ; fin ; c.-754T>A ; . ; . ; . ; . ;	upstream_gene_variant ; mfd ; c.-1054T>A ; . ; . ; . ; . ;	upstream_gene_variant ; spoVT ; c.-4723T>A ; . ; . ; . ; . ;
NC_000964.3	59463	T	A	228	hom	285	284	.	.	.	.	.	.	upstream_gene_variant ; pth ; c.-41T>A ; . ; . ; . ; . ;	upstream_gene_variant ; fin ; c.-667T>A ; . ; . ; . ; . ;	upstream_gene_variant ; mfd ; c.-967T>A ; . ; . ; . ; . ;	upstream_gene_variant ; spoVT ; c.-4636T>A ; . ; . ; . ; . ;	downstream_gene_variant ; purR ; c.*4165T>A ; . ; . ; . ; . ;
NC_000964.3	59872	G	A	225	hom	221	221	pth	gene-BSU_00530	59504	60070	+	synonymous_variant ; pth ; c.369G>A ; p.Thr123Thr ; 369/567 ; 369/567 ; 123/188 ;	synonymous_variant ; pth ; c.369G>A ; p.Thr123Thr ; 369/567 ; 369/567 ; 123/188 ;	upstream_gene_variant ; fin ; c.-258G>A ; . ; . ; . ; . ;	upstream_gene_variant ; mfd ; c.-558G>A ; . ; . ; . ; . ;	upstream_gene_variant ; spoVT ; c.-4227G>A ; . ; . ; . ; . ;	upstream_gene_variant ; yabM ; c.-4945G>A ; . ; . ; . ; . ;
NC_000964.3	59987	G	A	225	hom	169	169	pth	gene-BSU_00530	59504	60070	+	missense_variant ; pth ; c.484G>A ; p.Val162Ile ; 484/567 ; 484/567 ; 162/188 ;	missense_variant ; pth ; c.484G>A ; p.Val162Ile ; 484/567 ; 484/567 ; 162/188 ;	upstream_gene_variant ; fin ; c.-143G>A ; . ; . ; . ; . ;	upstream_gene_variant ; mfd ; c.-443G>A ; . ; . ; . ; . ;	upstream_gene_variant ; spoVT ; c.-4112G>A ; . ; . ; . ; . ;	upstream_gene_variant ; yabM ; c.-4830G>A ; . ; . ; . ; . ;
NC_000964.3	60122	A	T	225	hom	117	117	.	.	.	.	.	.	upstream_gene_variant ; fin ; c.-8A>T ; . ; . ; . ; . ;	upstream_gene_variant ; mfd ; c.-308A>T ; . ; . ; . ; . ;	upstream_gene_variant ; spoVT ; c.-3977A>T ; . ; . ; . ; . ;	upstream_gene_variant ; yabM ; c.-4695A>T ; . ; . ; . ; . ;	downstream_gene_variant ; purR ; c.*4824A>T ; . ; . ; . ; . ;
NC_000964.3	60300	C	T	225	hom	100	100	fin	gene-BSU_00540	60130	60360	+	synonymous_variant ; fin ; c.171C>T ; p.Asp57Asp ; 171/231 ; 171/231 ; 57/76 ;	synonymous_variant ; fin ; c.171C>T ; p.Asp57Asp ; 171/231 ; 171/231 ; 57/76 ;	upstream_gene_variant ; mfd ; c.-130C>T ; . ; . ; . ; . ;	upstream_gene_variant ; spoVT ; c.-3799C>T ; . ; . ; . ; . ;	upstream_gene_variant ; yabM ; c.-4517C>T ; . ; . ; . ; . ;	downstream_gene_variant ; ridA ; c.*4628C>T ; . ; . ; . ; . ;
NC_000964.3	60798	T	G	225	hom	295	295	mfd	gene-BSU_00550	60430	63963	+	synonymous_variant ; mfd ; c.369T>G ; p.Ala123Ala ; 369/3534 ; 369/3534 ; 123/1177 ;	synonymous_variant ; mfd ; c.369T>G ; p.Ala123Ala ; 369/3534 ; 369/3534 ; 123/1177 ;	upstream_gene_variant ; spoVT ; c.-3301T>G ; . ; . ; . ; . ;	upstream_gene_variant ; yabM ; c.-4019T>G ; . ; . ; . ; . ;	downstream_gene_variant ; spoVG ; c.*4639T>G ; . ; . ; . ; . ;	downstream_gene_variant ; glmU ; c.*3076T>G ; . ; . ; . ; . ;
NC_000964.3	60873	T	C	225	hom	273	273	mfd	gene-BSU_00550	60430	63963	+	synonymous_variant ; mfd ; c.444T>C ; p.Ile148Ile ; 444/3534 ; 444/3534 ; 148/1177 ;	synonymous_variant ; mfd ; c.444T>C ; p.Ile148Ile ; 444/3534 ; 444/3534 ; 148/1177 ;	upstream_gene_variant ; spoVT ; c.-3226T>C ; . ; . ; . ; . ;	upstream_gene_variant ; yabM ; c.-3944T>C ; . ; . ; . ; . ;	downstream_gene_variant ; spoVG ; c.*4714T>C ; . ; . ; . ; . ;	downstream_gene_variant ; glmU ; c.*3151T>C ; . ; . ; . ; . ;
NC_000964.3	60901	G	A	225	hom	266	266	mfd	gene-BSU_00550	60430	63963	+	missense_variant ; mfd ; c.472G>A ; p.Val158Ile ; 472/3534 ; 472/3534 ; 158/1177 ;	missense_variant ; mfd ; c.472G>A ; p.Val158Ile ; 472/3534 ; 472/3534 ; 158/1177 ;	upstream_gene_variant ; spoVT ; c.-3198G>A ; . ; . ; . ; . ;	upstream_gene_variant ; yabM ; c.-3916G>A ; . ; . ; . ; . ;	downstream_gene_variant ; spoVG ; c.*4742G>A ; . ; . ; . ; . ;	downstream_gene_variant ; glmU ; c.*3179G>A ; . ; . ; . ; . ;
NC_000964.3	60985	C	T	225	hom	188	188	mfd	gene-BSU_00550	60430	63963	+	synonymous_variant ; mfd ; c.556C>T ; p.Leu186Leu ; 556/3534 ; 556/3534 ; 186/1177 ;	synonymous_variant ; mfd ; c.556C>T ; p.Leu186Leu ; 556/3534 ; 556/3534 ; 186/1177 ;	upstream_gene_variant ; spoVT ; c.-3114C>T ; . ; . ; . ; . ;	upstream_gene_variant ; yabM ; c.-3832C>T ; . ; . ; . ; . ;	downstream_gene_variant ; spoVG ; c.*4826C>T ; . ; . ; . ; . ;	downstream_gene_variant ; glmU ; c.*3263C>T ; . ; . ; . ; . ;
NC_000964.3	61419	A	C	225	hom	99	99	mfd	gene-BSU_00550	60430	63963	+	synonymous_variant ; mfd ; c.990A>C ; p.Ile330Ile ; 990/3534 ; 990/3534 ; 330/1177 ;	synonymous_variant ; mfd ; c.990A>C ; p.Ile330Ile ; 990/3534 ; 990/3534 ; 330/1177 ;	upstream_gene_variant ; spoVT ; c.-2680A>C ; . ; . ; . ; . ;	upstream_gene_variant ; yabM ; c.-3398A>C ; . ; . ; . ; . ;	upstream_gene_variant ; yabN ; c.-4986A>C ; . ; . ; . ; . ;	downstream_gene_variant ; glmU ; c.*3697A>C ; . ; . ; . ; . ;
NC_000964.3	61689	G	A	225	hom	173	173	mfd	gene-BSU_00550	60430	63963	+	synonymous_variant ; mfd ; c.1260G>A ; p.Thr420Thr ; 1260/3534 ; 1260/3534 ; 420/1177 ;	synonymous_variant ; mfd ; c.1260G>A ; p.Thr420Thr ; 1260/3534 ; 1260/3534 ; 420/1177 ;	upstream_gene_variant ; spoVT ; c.-2410G>A ; . ; . ; . ; . ;	upstream_gene_variant ; yabM ; c.-3128G>A ; . ; . ; . ; . ;	upstream_gene_variant ; yabN ; c.-4716G>A ; . ; . ; . ; . ;	downstream_gene_variant ; glmU ; c.*3967G>A ; . ; . ; . ; . ;
NC_000964.3	61731	C	T	225	hom	192	192	mfd	gene-BSU_00550	60430	63963	+	synonymous_variant ; mfd ; c.1302C>T ; p.Ala434Ala ; 1302/3534 ; 1302/3534 ; 434/1177 ;	synonymous_variant ; mfd ; c.1302C>T ; p.Ala434Ala ; 1302/3534 ; 1302/3534 ; 434/1177 ;	upstream_gene_variant ; spoVT ; c.-2368C>T ; . ; . ; . ; . ;	upstream_gene_variant ; yabM ; c.-3086C>T ; . ; . ; . ; . ;	upstream_gene_variant ; yabN ; c.-4674C>T ; . ; . ; . ; . ;	downstream_gene_variant ; glmU ; c.*4009C>T ; . ; . ; . ; . ;
NC_000964.3	61974	A	G	225	hom	218	218	mfd	gene-BSU_00550	60430	63963	+	synonymous_variant ; mfd ; c.1545A>G ; p.Lys515Lys ; 1545/3534 ; 1545/3534 ; 515/1177 ;	synonymous_variant ; mfd ; c.1545A>G ; p.Lys515Lys ; 1545/3534 ; 1545/3534 ; 515/1177 ;	upstream_gene_variant ; spoVT ; c.-2125A>G ; . ; . ; . ; . ;	upstream_gene_variant ; yabM ; c.-2843A>G ; . ; . ; . ; . ;	upstream_gene_variant ; yabN ; c.-4431A>G ; . ; . ; . ; . ;	downstream_gene_variant ; glmU ; c.*4252A>G ; . ; . ; . ; . ;
NC_000964.3	62097	T	C	225	hom	239	239	mfd	gene-BSU_00550	60430	63963	+	synonymous_variant ; mfd ; c.1668T>C ; p.Val556Val ; 1668/3534 ; 1668/3534 ; 556/1177 ;	synonymous_variant ; mfd ; c.1668T>C ; p.Val556Val ; 1668/3534 ; 1668/3534 ; 556/1177 ;	upstream_gene_variant ; spoVT ; c.-2002T>C ; . ; . ; . ; . ;	upstream_gene_variant ; yabM ; c.-2720T>C ; . ; . ; . ; . ;	upstream_gene_variant ; yabN ; c.-4308T>C ; . ; . ; . ; . ;	downstream_gene_variant ; glmU ; c.*4375T>C ; . ; . ; . ; . ;
NC_000964.3	62190	T	A	225	hom	226	226	mfd	gene-BSU_00550	60430	63963	+	synonymous_variant ; mfd ; c.1761T>A ; p.Ile587Ile ; 1761/3534 ; 1761/3534 ; 587/1177 ;	synonymous_variant ; mfd ; c.1761T>A ; p.Ile587Ile ; 1761/3534 ; 1761/3534 ; 587/1177 ;	upstream_gene_variant ; spoVT ; c.-1909T>A ; . ; . ; . ; . ;	upstream_gene_variant ; yabM ; c.-2627T>A ; . ; . ; . ; . ;	upstream_gene_variant ; yabN ; c.-4215T>A ; . ; . ; . ; . ;	downstream_gene_variant ; glmU ; c.*4468T>A ; . ; . ; . ; . ;
NC_000964.3	62196	T	C	225	hom	217	217	mfd	gene-BSU_00550	60430	63963	+	synonymous_variant ; mfd ; c.1767T>C ; p.Asp589Asp ; 1767/3534 ; 1767/3534 ; 589/1177 ;	synonymous_variant ; mfd ; c.1767T>C ; p.Asp589Asp ; 1767/3534 ; 1767/3534 ; 589/1177 ;	upstream_gene_variant ; spoVT ; c.-1903T>C ; . ; . ; . ; . ;	upstream_gene_variant ; yabM ; c.-2621T>C ; . ; . ; . ; . ;	upstream_gene_variant ; yabN ; c.-4209T>C ; . ; . ; . ; . ;	downstream_gene_variant ; glmU ; c.*4474T>C ; . ; . ; . ; . ;
NC_000964.3	62307	G	T	225	hom	202	202	mfd	gene-BSU_00550	60430	63963	+	missense_variant ; mfd ; c.1878G>T ; p.Glu626Asp ; 1878/3534 ; 1878/3534 ; 626/1177 ;	missense_variant ; mfd ; c.1878G>T ; p.Glu626Asp ; 1878/3534 ; 1878/3534 ; 626/1177 ;	upstream_gene_variant ; spoVT ; c.-1792G>T ; . ; . ; . ; . ;	upstream_gene_variant ; yabM ; c.-2510G>T ; . ; . ; . ; . ;	upstream_gene_variant ; yabN ; c.-4098G>T ; . ; . ; . ; . ;	downstream_gene_variant ; glmU ; c.*4585G>T ; . ; . ; . ; . ;
NC_000964.3	62322	T	G	225	hom	208	208	mfd	gene-BSU_00550	60430	63963	+	synonymous_variant ; mfd ; c.1893T>G ; p.Ser631Ser ; 1893/3534 ; 1893/3534 ; 631/1177 ;	synonymous_variant ; mfd ; c.1893T>G ; p.Ser631Ser ; 1893/3534 ; 1893/3534 ; 631/1177 ;	upstream_gene_variant ; spoVT ; c.-1777T>G ; . ; . ; . ; . ;	upstream_gene_variant ; yabM ; c.-2495T>G ; . ; . ; . ; . ;	upstream_gene_variant ; yabN ; c.-4083T>G ; . ; . ; . ; . ;	downstream_gene_variant ; glmU ; c.*4600T>G ; . ; . ; . ; . ;
NC_000964.3	62475	C	A	225	hom	252	252	mfd	gene-BSU_00550	60430	63963	+	synonymous_variant ; mfd ; c.2046C>A ; p.Thr682Thr ; 2046/3534 ; 2046/3534 ; 682/1177 ;	synonymous_variant ; mfd ; c.2046C>A ; p.Thr682Thr ; 2046/3534 ; 2046/3534 ; 682/1177 ;	upstream_gene_variant ; spoVT ; c.-1624C>A ; . ; . ; . ; . ;	upstream_gene_variant ; yabM ; c.-2342C>A ; . ; . ; . ; . ;	upstream_gene_variant ; yabN ; c.-3930C>A ; . ; . ; . ; . ;	downstream_gene_variant ; glmU ; c.*4753C>A ; . ; . ; . ; . ;
NC_000964.3	62493	C	T	225	hom	241	241	mfd	gene-BSU_00550	60430	63963	+	synonymous_variant ; mfd ; c.2064C>T ; p.His688His ; 2064/3534 ; 2064/3534 ; 688/1177 ;	synonymous_variant ; mfd ; c.2064C>T ; p.His688His ; 2064/3534 ; 2064/3534 ; 688/1177 ;	upstream_gene_variant ; spoVT ; c.-1606C>T ; . ; . ; . ; . ;	upstream_gene_variant ; yabM ; c.-2324C>T ; . ; . ; . ; . ;	upstream_gene_variant ; yabN ; c.-3912C>T ; . ; . ; . ; . ;	downstream_gene_variant ; glmU ; c.*4771C>T ; . ; . ; . ; . ;
NC_000964.3	62541	C	A	225	hom	269	269	mfd	gene-BSU_00550	60430	63963	+	synonymous_variant ; mfd ; c.2112C>A ; p.Gly704Gly ; 2112/3534 ; 2112/3534 ; 704/1177 ;	synonymous_variant ; mfd ; c.2112C>A ; p.Gly704Gly ; 2112/3534 ; 2112/3534 ; 704/1177 ;	upstream_gene_variant ; spoVT ; c.-1558C>A ; . ; . ; . ; . ;	upstream_gene_variant ; yabM ; c.-2276C>A ; . ; . ; . ; . ;	upstream_gene_variant ; yabN ; c.-3864C>A ; . ; . ; . ; . ;	downstream_gene_variant ; glmU ; c.*4819C>A ; . ; . ; . ; . ;
NC_000964.3	62601	T	C	225	hom	291	291	mfd	gene-BSU_00550	60430	63963	+	synonymous_variant ; mfd ; c.2172T>C ; p.Asn724Asn ; 2172/3534 ; 2172/3534 ; 724/1177 ;	synonymous_variant ; mfd ; c.2172T>C ; p.Asn724Asn ; 2172/3534 ; 2172/3534 ; 724/1177 ;	upstream_gene_variant ; spoVT ; c.-1498T>C ; . ; . ; . ; . ;	upstream_gene_variant ; yabM ; c.-2216T>C ; . ; . ; . ; . ;	upstream_gene_variant ; yabN ; c.-3804T>C ; . ; . ; . ; . ;	downstream_gene_variant ; glmU ; c.*4879T>C ; . ; . ; . ; . ;
NC_000964.3	62607	G	A	225	hom	299	299	mfd	gene-BSU_00550	60430	63963	+	synonymous_variant ; mfd ; c.2178G>A ; p.Thr726Thr ; 2178/3534 ; 2178/3534 ; 726/1177 ;	synonymous_variant ; mfd ; c.2178G>A ; p.Thr726Thr ; 2178/3534 ; 2178/3534 ; 726/1177 ;	upstream_gene_variant ; spoVT ; c.-1492G>A ; . ; . ; . ; . ;	upstream_gene_variant ; yabM ; c.-2210G>A ; . ; . ; . ; . ;	upstream_gene_variant ; yabN ; c.-3798G>A ; . ; . ; . ; . ;	downstream_gene_variant ; glmU ; c.*4885G>A ; . ; . ; . ; . ;
NC_000964.3	62664	C	T	225	hom	312	312	mfd	gene-BSU_00550	60430	63963	+	synonymous_variant ; mfd ; c.2235C>T ; p.Asp745Asp ; 2235/3534 ; 2235/3534 ; 745/1177 ;	synonymous_variant ; mfd ; c.2235C>T ; p.Asp745Asp ; 2235/3534 ; 2235/3534 ; 745/1177 ;	upstream_gene_variant ; spoVT ; c.-1435C>T ; . ; . ; . ; . ;	upstream_gene_variant ; yabM ; c.-2153C>T ; . ; . ; . ; . ;	upstream_gene_variant ; yabN ; c.-3741C>T ; . ; . ; . ; . ;	downstream_gene_variant ; glmU ; c.*4942C>T ; . ; . ; . ; . ;
NC_000964.3	62769	G	A	225	hom	335	335	mfd	gene-BSU_00550	60430	63963	+	synonymous_variant ; mfd ; c.2340G>A ; p.Thr780Thr ; 2340/3534 ; 2340/3534 ; 780/1177 ;	synonymous_variant ; mfd ; c.2340G>A ; p.Thr780Thr ; 2340/3534 ; 2340/3534 ; 780/1177 ;	upstream_gene_variant ; spoVT ; c.-1330G>A ; . ; . ; . ; . ;	upstream_gene_variant ; yabM ; c.-2048G>A ; . ; . ; . ; . ;	upstream_gene_variant ; yabN ; c.-3636G>A ; . ; . ; . ; . ;	downstream_gene_variant ; prs ; c.*4071G>A ; . ; . ; . ; . ;
NC_000964.3	62772	G	T	225	hom	338	338	mfd	gene-BSU_00550	60430	63963	+	synonymous_variant ; mfd ; c.2343G>T ; p.Pro781Pro ; 2343/3534 ; 2343/3534 ; 781/1177 ;	synonymous_variant ; mfd ; c.2343G>T ; p.Pro781Pro ; 2343/3534 ; 2343/3534 ; 781/1177 ;	upstream_gene_variant ; spoVT ; c.-1327G>T ; . ; . ; . ; . ;	upstream_gene_variant ; yabM ; c.-2045G>T ; . ; . ; . ; . ;	upstream_gene_variant ; yabN ; c.-3633G>T ; . ; . ; . ; . ;	downstream_gene_variant ; prs ; c.*4074G>T ; . ; . ; . ; . ;
NC_000964.3	62976	G	T	225	hom	285	285	mfd	gene-BSU_00550	60430	63963	+	synonymous_variant ; mfd ; c.2547G>T ; p.Ala849Ala ; 2547/3534 ; 2547/3534 ; 849/1177 ;	synonymous_variant ; mfd ; c.2547G>T ; p.Ala849Ala ; 2547/3534 ; 2547/3534 ; 849/1177 ;	upstream_gene_variant ; spoVT ; c.-1123G>T ; . ; . ; . ; . ;	upstream_gene_variant ; yabM ; c.-1841G>T ; . ; . ; . ; . ;	upstream_gene_variant ; yabN ; c.-3429G>T ; . ; . ; . ; . ;	upstream_gene_variant ; hslR ; c.-4901G>T ; . ; . ; . ; . ;
NC_000964.3	63066	C	T	225	hom	272	272	mfd	gene-BSU_00550	60430	63963	+	synonymous_variant ; mfd ; c.2637C>T ; p.Ser879Ser ; 2637/3534 ; 2637/3534 ; 879/1177 ;	synonymous_variant ; mfd ; c.2637C>T ; p.Ser879Ser ; 2637/3534 ; 2637/3534 ; 879/1177 ;	upstream_gene_variant ; spoVT ; c.-1033C>T ; . ; . ; . ; . ;	upstream_gene_variant ; yabM ; c.-1751C>T ; . ; . ; . ; . ;	upstream_gene_variant ; yabN ; c.-3339C>T ; . ; . ; . ; . ;	upstream_gene_variant ; hslR ; c.-4811C>T ; . ; . ; . ; . ;
NC_000964.3	63132	A	G	225	hom	252	252	mfd	gene-BSU_00550	60430	63963	+	synonymous_variant ; mfd ; c.2703A>G ; p.Pro901Pro ; 2703/3534 ; 2703/3534 ; 901/1177 ;	synonymous_variant ; mfd ; c.2703A>G ; p.Pro901Pro ; 2703/3534 ; 2703/3534 ; 901/1177 ;	upstream_gene_variant ; spoVT ; c.-967A>G ; . ; . ; . ; . ;	upstream_gene_variant ; yabM ; c.-1685A>G ; . ; . ; . ; . ;	upstream_gene_variant ; yabN ; c.-3273A>G ; . ; . ; . ; . ;	upstream_gene_variant ; hslR ; c.-4745A>G ; . ; . ; . ; . ;
NC_000964.3	63210	C	T	225	hom	242	242	mfd	gene-BSU_00550	60430	63963	+	synonymous_variant ; mfd ; c.2781C>T ; p.Gly927Gly ; 2781/3534 ; 2781/3534 ; 927/1177 ;	synonymous_variant ; mfd ; c.2781C>T ; p.Gly927Gly ; 2781/3534 ; 2781/3534 ; 927/1177 ;	upstream_gene_variant ; spoVT ; c.-889C>T ; . ; . ; . ; . ;	upstream_gene_variant ; yabM ; c.-1607C>T ; . ; . ; . ; . ;	upstream_gene_variant ; yabN ; c.-3195C>T ; . ; . ; . ; . ;	upstream_gene_variant ; hslR ; c.-4667C>T ; . ; . ; . ; . ;
NC_000964.3	63294	T	C	225	hom	187	187	mfd	gene-BSU_00550	60430	63963	+	synonymous_variant ; mfd ; c.2865T>C ; p.Ala955Ala ; 2865/3534 ; 2865/3534 ; 955/1177 ;	synonymous_variant ; mfd ; c.2865T>C ; p.Ala955Ala ; 2865/3534 ; 2865/3534 ; 955/1177 ;	upstream_gene_variant ; spoVT ; c.-805T>C ; . ; . ; . ; . ;	upstream_gene_variant ; yabM ; c.-1523T>C ; . ; . ; . ; . ;	upstream_gene_variant ; yabN ; c.-3111T>C ; . ; . ; . ; . ;	upstream_gene_variant ; hslR ; c.-4583T>C ; . ; . ; . ; . ;
NC_000964.3	63313	T	C	225	hom	177	177	mfd	gene-BSU_00550	60430	63963	+	synonymous_variant ; mfd ; c.2884T>C ; p.Leu962Leu ; 2884/3534 ; 2884/3534 ; 962/1177 ;	synonymous_variant ; mfd ; c.2884T>C ; p.Leu962Leu ; 2884/3534 ; 2884/3534 ; 962/1177 ;	upstream_gene_variant ; spoVT ; c.-786T>C ; . ; . ; . ; . ;	upstream_gene_variant ; yabM ; c.-1504T>C ; . ; . ; . ; . ;	upstream_gene_variant ; yabN ; c.-3092T>C ; . ; . ; . ; . ;	upstream_gene_variant ; hslR ; c.-4564T>C ; . ; . ; . ; . ;
NC_000964.3	63535	A	G	225	hom	297	297	mfd	gene-BSU_00550	60430	63963	+	missense_variant ; mfd ; c.3106A>G ; p.Ile1036Val ; 3106/3534 ; 3106/3534 ; 1036/1177 ;	missense_variant ; mfd ; c.3106A>G ; p.Ile1036Val ; 3106/3534 ; 3106/3534 ; 1036/1177 ;	upstream_gene_variant ; spoVT ; c.-564A>G ; . ; . ; . ; . ;	upstream_gene_variant ; yabM ; c.-1282A>G ; . ; . ; . ; . ;	upstream_gene_variant ; yabN ; c.-2870A>G ; . ; . ; . ; . ;	upstream_gene_variant ; hslR ; c.-4342A>G ; . ; . ; . ; . ;
NC_000964.3	63939	A	G	225	hom	271	271	mfd	gene-BSU_00550	60430	63963	+	synonymous_variant ; mfd ; c.3510A>G ; p.Lys1170Lys ; 3510/3534 ; 3510/3534 ; 1170/1177 ;	synonymous_variant ; mfd ; c.3510A>G ; p.Lys1170Lys ; 3510/3534 ; 3510/3534 ; 1170/1177 ;	upstream_gene_variant ; spoVT ; c.-160A>G ; . ; . ; . ; . ;	upstream_gene_variant ; yabM ; c.-878A>G ; . ; . ; . ; . ;	upstream_gene_variant ; yabN ; c.-2466A>G ; . ; . ; . ; . ;	upstream_gene_variant ; hslR ; c.-3938A>G ; . ; . ; . ; . ;
NC_000964.3	64245	C	T	225	hom	193	193	spoVT	gene-BSU_00560	64099	64635	+	synonymous_variant ; spoVT ; c.147C>T ; p.Tyr49Tyr ; 147/537 ; 147/537 ; 49/178 ;	synonymous_variant ; spoVT ; c.147C>T ; p.Tyr49Tyr ; 147/537 ; 147/537 ; 49/178 ;	upstream_gene_variant ; yabM ; c.-572C>T ; . ; . ; . ; . ;	upstream_gene_variant ; yabN ; c.-2160C>T ; . ; . ; . ; . ;	upstream_gene_variant ; hslR ; c.-3632C>T ; . ; . ; . ; . ;	upstream_gene_variant ; spcP ; c.-3971C>T ; . ; . ; . ; . ;
NC_000964.3	64503	A	C	225	hom	199	199	spoVT	gene-BSU_00560	64099	64635	+	synonymous_variant ; spoVT ; c.405A>C ; p.Val135Val ; 405/537 ; 405/537 ; 135/178 ;	synonymous_variant ; spoVT ; c.405A>C ; p.Val135Val ; 405/537 ; 405/537 ; 135/178 ;	upstream_gene_variant ; yabM ; c.-314A>C ; . ; . ; . ; . ;	upstream_gene_variant ; yabN ; c.-1902A>C ; . ; . ; . ; . ;	upstream_gene_variant ; hslR ; c.-3374A>C ; . ; . ; . ; . ;	upstream_gene_variant ; spcP ; c.-3713A>C ; . ; . ; . ; . ;
NC_000964.3	64548	C	T	225	hom	145	145	spoVT	gene-BSU_00560	64099	64635	+	synonymous_variant ; spoVT ; c.450C>T ; p.Ile150Ile ; 450/537 ; 450/537 ; 150/178 ;	synonymous_variant ; spoVT ; c.450C>T ; p.Ile150Ile ; 450/537 ; 450/537 ; 150/178 ;	upstream_gene_variant ; yabM ; c.-269C>T ; . ; . ; . ; . ;	upstream_gene_variant ; yabN ; c.-1857C>T ; . ; . ; . ; . ;	upstream_gene_variant ; hslR ; c.-3329C>T ; . ; . ; . ; . ;	upstream_gene_variant ; spcP ; c.-3668C>T ; . ; . ; . ; . ;
NC_000964.3	64710	C	G	225	hom	81	81	.	.	.	.	.	.	upstream_gene_variant ; yabM ; c.-107C>G ; . ; . ; . ; . ;	upstream_gene_variant ; yabN ; c.-1695C>G ; . ; . ; . ; . ;	upstream_gene_variant ; hslR ; c.-3167C>G ; . ; . ; . ; . ;	upstream_gene_variant ; spcP ; c.-3506C>G ; . ; . ; . ; . ;	upstream_gene_variant ; spcQ ; c.-3805C>G ; . ; . ; . ; . ;
NC_000964.3	65092	G	A	225	hom	178	178	yabM	gene-BSU_00570	64817	66415	+	synonymous_variant ; yabM ; c.276G>A ; p.Leu92Leu ; 276/1599 ; 276/1599 ; 92/532 ;	synonymous_variant ; yabM ; c.276G>A ; p.Leu92Leu ; 276/1599 ; 276/1599 ; 92/532 ;	upstream_gene_variant ; yabN ; c.-1313G>A ; . ; . ; . ; . ;	upstream_gene_variant ; hslR ; c.-2785G>A ; . ; . ; . ; . ;	upstream_gene_variant ; spcP ; c.-3124G>A ; . ; . ; . ; . ;	upstream_gene_variant ; spcQ ; c.-3423G>A ; . ; . ; . ; . ;
NC_000964.3	65167	A	G	225	hom	244	244	yabM	gene-BSU_00570	64817	66415	+	synonymous_variant ; yabM ; c.351A>G ; p.Gly117Gly ; 351/1599 ; 351/1599 ; 117/532 ;	synonymous_variant ; yabM ; c.351A>G ; p.Gly117Gly ; 351/1599 ; 351/1599 ; 117/532 ;	upstream_gene_variant ; yabN ; c.-1238A>G ; . ; . ; . ; . ;	upstream_gene_variant ; hslR ; c.-2710A>G ; . ; . ; . ; . ;	upstream_gene_variant ; spcP ; c.-3049A>G ; . ; . ; . ; . ;	upstream_gene_variant ; spcQ ; c.-3348A>G ; . ; . ; . ; . ;
NC_000964.3	65203	A	G	225	hom	254	254	yabM	gene-BSU_00570	64817	66415	+	synonymous_variant ; yabM ; c.387A>G ; p.Ala129Ala ; 387/1599 ; 387/1599 ; 129/532 ;	synonymous_variant ; yabM ; c.387A>G ; p.Ala129Ala ; 387/1599 ; 387/1599 ; 129/532 ;	upstream_gene_variant ; yabN ; c.-1202A>G ; . ; . ; . ; . ;	upstream_gene_variant ; hslR ; c.-2674A>G ; . ; . ; . ; . ;	upstream_gene_variant ; spcP ; c.-3013A>G ; . ; . ; . ; . ;	upstream_gene_variant ; spcQ ; c.-3312A>G ; . ; . ; . ; . ;
NC_000964.3	65218	T	G	225	hom	249	249	yabM	gene-BSU_00570	64817	66415	+	synonymous_variant ; yabM ; c.402T>G ; p.Leu134Leu ; 402/1599 ; 402/1599 ; 134/532 ;	synonymous_variant ; yabM ; c.402T>G ; p.Leu134Leu ; 402/1599 ; 402/1599 ; 134/532 ;	upstream_gene_variant ; yabN ; c.-1187T>G ; . ; . ; . ; . ;	upstream_gene_variant ; hslR ; c.-2659T>G ; . ; . ; . ; . ;	upstream_gene_variant ; spcP ; c.-2998T>G ; . ; . ; . ; . ;	upstream_gene_variant ; spcQ ; c.-3297T>G ; . ; . ; . ; . ;
NC_000964.3	65233	G	A	225	hom	252	252	yabM	gene-BSU_00570	64817	66415	+	synonymous_variant ; yabM ; c.417G>A ; p.Ala139Ala ; 417/1599 ; 417/1599 ; 139/532 ;	synonymous_variant ; yabM ; c.417G>A ; p.Ala139Ala ; 417/1599 ; 417/1599 ; 139/532 ;	upstream_gene_variant ; yabN ; c.-1172G>A ; . ; . ; . ; . ;	upstream_gene_variant ; hslR ; c.-2644G>A ; . ; . ; . ; . ;	upstream_gene_variant ; spcP ; c.-2983G>A ; . ; . ; . ; . ;	upstream_gene_variant ; spcQ ; c.-3282G>A ; . ; . ; . ; . ;
NC_000964.3	65239	A	T	225	hom	246	246	yabM	gene-BSU_00570	64817	66415	+	synonymous_variant ; yabM ; c.423A>T ; p.Leu141Leu ; 423/1599 ; 423/1599 ; 141/532 ;	synonymous_variant ; yabM ; c.423A>T ; p.Leu141Leu ; 423/1599 ; 423/1599 ; 141/532 ;	upstream_gene_variant ; yabN ; c.-1166A>T ; . ; . ; . ; . ;	upstream_gene_variant ; hslR ; c.-2638A>T ; . ; . ; . ; . ;	upstream_gene_variant ; spcP ; c.-2977A>T ; . ; . ; . ; . ;	upstream_gene_variant ; spcQ ; c.-3276A>T ; . ; . ; . ; . ;
NC_000964.3	65425	A	G	225	hom	103	103	yabM	gene-BSU_00570	64817	66415	+	missense_variant ; yabM ; c.609A>G ; p.Ile203Met ; 609/1599 ; 609/1599 ; 203/532 ;	missense_variant ; yabM ; c.609A>G ; p.Ile203Met ; 609/1599 ; 609/1599 ; 203/532 ;	upstream_gene_variant ; yabN ; c.-980A>G ; . ; . ; . ; . ;	upstream_gene_variant ; hslR ; c.-2452A>G ; . ; . ; . ; . ;	upstream_gene_variant ; spcP ; c.-2791A>G ; . ; . ; . ; . ;	upstream_gene_variant ; spcQ ; c.-3090A>G ; . ; . ; . ; . ;
NC_000964.3	65446	C	T	225	hom	91	91	yabM	gene-BSU_00570	64817	66415	+	synonymous_variant ; yabM ; c.630C>T ; p.Phe210Phe ; 630/1599 ; 630/1599 ; 210/532 ;	synonymous_variant ; yabM ; c.630C>T ; p.Phe210Phe ; 630/1599 ; 630/1599 ; 210/532 ;	upstream_gene_variant ; yabN ; c.-959C>T ; . ; . ; . ; . ;	upstream_gene_variant ; hslR ; c.-2431C>T ; . ; . ; . ; . ;	upstream_gene_variant ; spcP ; c.-2770C>T ; . ; . ; . ; . ;	upstream_gene_variant ; spcQ ; c.-3069C>T ; . ; . ; . ; . ;
NC_000964.3	65455	A	T	225	hom	91	91	yabM	gene-BSU_00570	64817	66415	+	missense_variant ; yabM ; c.639A>T ; p.Lys213Asn ; 639/1599 ; 639/1599 ; 213/532 ;	missense_variant ; yabM ; c.639A>T ; p.Lys213Asn ; 639/1599 ; 639/1599 ; 213/532 ;	upstream_gene_variant ; yabN ; c.-950A>T ; . ; . ; . ; . ;	upstream_gene_variant ; hslR ; c.-2422A>T ; . ; . ; . ; . ;	upstream_gene_variant ; spcP ; c.-2761A>T ; . ; . ; . ; . ;	upstream_gene_variant ; spcQ ; c.-3060A>T ; . ; . ; . ; . ;
NC_000964.3	65536	C	T	225	hom	87	87	yabM	gene-BSU_00570	64817	66415	+	synonymous_variant ; yabM ; c.720C>T ; p.Val240Val ; 720/1599 ; 720/1599 ; 240/532 ;	synonymous_variant ; yabM ; c.720C>T ; p.Val240Val ; 720/1599 ; 720/1599 ; 240/532 ;	upstream_gene_variant ; yabN ; c.-869C>T ; . ; . ; . ; . ;	upstream_gene_variant ; hslR ; c.-2341C>T ; . ; . ; . ; . ;	upstream_gene_variant ; spcP ; c.-2680C>T ; . ; . ; . ; . ;	upstream_gene_variant ; spcQ ; c.-2979C>T ; . ; . ; . ; . ;
NC_000964.3	65639	T	C	225	hom	112	112	yabM	gene-BSU_00570	64817	66415	+	missense_variant ; yabM ; c.823T>C ; p.Cys275Arg ; 823/1599 ; 823/1599 ; 275/532 ;	missense_variant ; yabM ; c.823T>C ; p.Cys275Arg ; 823/1599 ; 823/1599 ; 275/532 ;	upstream_gene_variant ; yabN ; c.-766T>C ; . ; . ; . ; . ;	upstream_gene_variant ; hslR ; c.-2238T>C ; . ; . ; . ; . ;	upstream_gene_variant ; spcP ; c.-2577T>C ; . ; . ; . ; . ;	upstream_gene_variant ; spcQ ; c.-2876T>C ; . ; . ; . ; . ;
NC_000964.3	65665	A	G	225	hom	112	112	yabM	gene-BSU_00570	64817	66415	+	synonymous_variant ; yabM ; c.849A>G ; p.Gly283Gly ; 849/1599 ; 849/1599 ; 283/532 ;	synonymous_variant ; yabM ; c.849A>G ; p.Gly283Gly ; 849/1599 ; 849/1599 ; 283/532 ;	upstream_gene_variant ; yabN ; c.-740A>G ; . ; . ; . ; . ;	upstream_gene_variant ; hslR ; c.-2212A>G ; . ; . ; . ; . ;	upstream_gene_variant ; spcP ; c.-2551A>G ; . ; . ; . ; . ;	upstream_gene_variant ; spcQ ; c.-2850A>G ; . ; . ; . ; . ;
NC_000964.3	65675	T	C	225	hom	116	116	yabM	gene-BSU_00570	64817	66415	+	synonymous_variant ; yabM ; c.859T>C ; p.Leu287Leu ; 859/1599 ; 859/1599 ; 287/532 ;	synonymous_variant ; yabM ; c.859T>C ; p.Leu287Leu ; 859/1599 ; 859/1599 ; 287/532 ;	upstream_gene_variant ; yabN ; c.-730T>C ; . ; . ; . ; . ;	upstream_gene_variant ; hslR ; c.-2202T>C ; . ; . ; . ; . ;	upstream_gene_variant ; spcP ; c.-2541T>C ; . ; . ; . ; . ;	upstream_gene_variant ; spcQ ; c.-2840T>C ; . ; . ; . ; . ;
NC_000964.3	65686	T	C	225	hom	117	117	yabM	gene-BSU_00570	64817	66415	+	synonymous_variant ; yabM ; c.870T>C ; p.Gly290Gly ; 870/1599 ; 870/1599 ; 290/532 ;	synonymous_variant ; yabM ; c.870T>C ; p.Gly290Gly ; 870/1599 ; 870/1599 ; 290/532 ;	upstream_gene_variant ; yabN ; c.-719T>C ; . ; . ; . ; . ;	upstream_gene_variant ; hslR ; c.-2191T>C ; . ; . ; . ; . ;	upstream_gene_variant ; spcP ; c.-2530T>C ; . ; . ; . ; . ;	upstream_gene_variant ; spcQ ; c.-2829T>C ; . ; . ; . ; . ;
NC_000964.3	65698	C	T	225	hom	117	117	yabM	gene-BSU_00570	64817	66415	+	synonymous_variant ; yabM ; c.882C>T ; p.Ala294Ala ; 882/1599 ; 882/1599 ; 294/532 ;	synonymous_variant ; yabM ; c.882C>T ; p.Ala294Ala ; 882/1599 ; 882/1599 ; 294/532 ;	upstream_gene_variant ; yabN ; c.-707C>T ; . ; . ; . ; . ;	upstream_gene_variant ; hslR ; c.-2179C>T ; . ; . ; . ; . ;	upstream_gene_variant ; spcP ; c.-2518C>T ; . ; . ; . ; . ;	upstream_gene_variant ; spcQ ; c.-2817C>T ; . ; . ; . ; . ;
NC_000964.3	66010	G	A	225	hom	205	205	yabM	gene-BSU_00570	64817	66415	+	synonymous_variant ; yabM ; c.1194G>A ; p.Ala398Ala ; 1194/1599 ; 1194/1599 ; 398/532 ;	synonymous_variant ; yabM ; c.1194G>A ; p.Ala398Ala ; 1194/1599 ; 1194/1599 ; 398/532 ;	upstream_gene_variant ; yabN ; c.-395G>A ; . ; . ; . ; . ;	upstream_gene_variant ; hslR ; c.-1867G>A ; . ; . ; . ; . ;	upstream_gene_variant ; spcP ; c.-2206G>A ; . ; . ; . ; . ;	upstream_gene_variant ; spcQ ; c.-2505G>A ; . ; . ; . ; . ;
NC_000964.3	66106	T	C	225	hom	218	218	yabM	gene-BSU_00570	64817	66415	+	synonymous_variant ; yabM ; c.1290T>C ; p.Leu430Leu ; 1290/1599 ; 1290/1599 ; 430/532 ;	synonymous_variant ; yabM ; c.1290T>C ; p.Leu430Leu ; 1290/1599 ; 1290/1599 ; 430/532 ;	upstream_gene_variant ; yabN ; c.-299T>C ; . ; . ; . ; . ;	upstream_gene_variant ; hslR ; c.-1771T>C ; . ; . ; . ; . ;	upstream_gene_variant ; spcP ; c.-2110T>C ; . ; . ; . ; . ;	upstream_gene_variant ; spcQ ; c.-2409T>C ; . ; . ; . ; . ;
NC_000964.3	66199	T	C	225	hom	179	179	yabM	gene-BSU_00570	64817	66415	+	synonymous_variant ; yabM ; c.1383T>C ; p.Val461Val ; 1383/1599 ; 1383/1599 ; 461/532 ;	synonymous_variant ; yabM ; c.1383T>C ; p.Val461Val ; 1383/1599 ; 1383/1599 ; 461/532 ;	upstream_gene_variant ; yabN ; c.-206T>C ; . ; . ; . ; . ;	upstream_gene_variant ; hslR ; c.-1678T>C ; . ; . ; . ; . ;	upstream_gene_variant ; spcP ; c.-2017T>C ; . ; . ; . ; . ;	upstream_gene_variant ; spcQ ; c.-2316T>C ; . ; . ; . ; . ;
NC_000964.3	66213	C	T	225	hom	166	166	yabM	gene-BSU_00570	64817	66415	+	missense_variant ; yabM ; c.1397C>T ; p.Thr466Met ; 1397/1599 ; 1397/1599 ; 466/532 ;	missense_variant ; yabM ; c.1397C>T ; p.Thr466Met ; 1397/1599 ; 1397/1599 ; 466/532 ;	upstream_gene_variant ; yabN ; c.-192C>T ; . ; . ; . ; . ;	upstream_gene_variant ; hslR ; c.-1664C>T ; . ; . ; . ; . ;	upstream_gene_variant ; spcP ; c.-2003C>T ; . ; . ; . ; . ;	upstream_gene_variant ; spcQ ; c.-2302C>T ; . ; . ; . ; . ;
NC_000964.3	66218	C	T	225	hom	160	160	yabM	gene-BSU_00570	64817	66415	+	missense_variant ; yabM ; c.1402C>T ; p.Leu468Phe ; 1402/1599 ; 1402/1599 ; 468/532 ;	missense_variant ; yabM ; c.1402C>T ; p.Leu468Phe ; 1402/1599 ; 1402/1599 ; 468/532 ;	upstream_gene_variant ; yabN ; c.-187C>T ; . ; . ; . ; . ;	upstream_gene_variant ; hslR ; c.-1659C>T ; . ; . ; . ; . ;	upstream_gene_variant ; spcP ; c.-1998C>T ; . ; . ; . ; . ;	upstream_gene_variant ; spcQ ; c.-2297C>T ; . ; . ; . ; . ;
NC_000964.3	66220	C	T	225	hom	160	160	yabM	gene-BSU_00570	64817	66415	+	synonymous_variant ; yabM ; c.1404C>T ; p.Leu468Leu ; 1404/1599 ; 1404/1599 ; 468/532 ;	synonymous_variant ; yabM ; c.1404C>T ; p.Leu468Leu ; 1404/1599 ; 1404/1599 ; 468/532 ;	upstream_gene_variant ; yabN ; c.-185C>T ; . ; . ; . ; . ;	upstream_gene_variant ; hslR ; c.-1657C>T ; . ; . ; . ; . ;	upstream_gene_variant ; spcP ; c.-1996C>T ; . ; . ; . ; . ;	upstream_gene_variant ; spcQ ; c.-2295C>T ; . ; . ; . ; . ;
NC_000964.3	66225	C	A	225	hom	160	160	yabM	gene-BSU_00570	64817	66415	+	missense_variant ; yabM ; c.1409C>A ; p.Thr470Asn ; 1409/1599 ; 1409/1599 ; 470/532 ;	missense_variant ; yabM ; c.1409C>A ; p.Thr470Asn ; 1409/1599 ; 1409/1599 ; 470/532 ;	upstream_gene_variant ; yabN ; c.-180C>A ; . ; . ; . ; . ;	upstream_gene_variant ; hslR ; c.-1652C>A ; . ; . ; . ; . ;	upstream_gene_variant ; spcP ; c.-1991C>A ; . ; . ; . ; . ;	upstream_gene_variant ; spcQ ; c.-2290C>A ; . ; . ; . ; . ;
NC_000964.3	66229	C	T	225	hom	159	159	yabM	gene-BSU_00570	64817	66415	+	synonymous_variant ; yabM ; c.1413C>T ; p.Phe471Phe ; 1413/1599 ; 1413/1599 ; 471/532 ;	synonymous_variant ; yabM ; c.1413C>T ; p.Phe471Phe ; 1413/1599 ; 1413/1599 ; 471/532 ;	upstream_gene_variant ; yabN ; c.-176C>T ; . ; . ; . ; . ;	upstream_gene_variant ; hslR ; c.-1648C>T ; . ; . ; . ; . ;	upstream_gene_variant ; spcP ; c.-1987C>T ; . ; . ; . ; . ;	upstream_gene_variant ; spcQ ; c.-2286C>T ; . ; . ; . ; . ;
NC_000964.3	66241	A	T	225	hom	206	206	yabM	gene-BSU_00570	64817	66415	+	synonymous_variant ; yabM ; c.1425A>T ; p.Ala475Ala ; 1425/1599 ; 1425/1599 ; 475/532 ;	synonymous_variant ; yabM ; c.1425A>T ; p.Ala475Ala ; 1425/1599 ; 1425/1599 ; 475/532 ;	upstream_gene_variant ; yabN ; c.-164A>T ; . ; . ; . ; . ;	upstream_gene_variant ; hslR ; c.-1636A>T ; . ; . ; . ; . ;	upstream_gene_variant ; spcP ; c.-1975A>T ; . ; . ; . ; . ;	upstream_gene_variant ; spcQ ; c.-2274A>T ; . ; . ; . ; . ;
NC_000964.3	66255	C	T	225	hom	226	226	yabM	gene-BSU_00570	64817	66415	+	missense_variant ; yabM ; c.1439C>T ; p.Ala480Val ; 1439/1599 ; 1439/1599 ; 480/532 ;	missense_variant ; yabM ; c.1439C>T ; p.Ala480Val ; 1439/1599 ; 1439/1599 ; 480/532 ;	upstream_gene_variant ; yabN ; c.-150C>T ; . ; . ; . ; . ;	upstream_gene_variant ; hslR ; c.-1622C>T ; . ; . ; . ; . ;	upstream_gene_variant ; spcP ; c.-1961C>T ; . ; . ; . ; . ;	upstream_gene_variant ; spcQ ; c.-2260C>T ; . ; . ; . ; . ;
NC_000964.3	66256	G	T	225	hom	226	226	yabM	gene-BSU_00570	64817	66415	+	synonymous_variant ; yabM ; c.1440G>T ; p.Ala480Ala ; 1440/1599 ; 1440/1599 ; 480/532 ;	synonymous_variant ; yabM ; c.1440G>T ; p.Ala480Ala ; 1440/1599 ; 1440/1599 ; 480/532 ;	upstream_gene_variant ; yabN ; c.-149G>T ; . ; . ; . ; . ;	upstream_gene_variant ; hslR ; c.-1621G>T ; . ; . ; . ; . ;	upstream_gene_variant ; spcP ; c.-1960G>T ; . ; . ; . ; . ;	upstream_gene_variant ; spcQ ; c.-2259G>T ; . ; . ; . ; . ;
NC_000964.3	66299	G	A	225	hom	255	255	yabM	gene-BSU_00570	64817	66415	+	missense_variant ; yabM ; c.1483G>A ; p.Val495Met ; 1483/1599 ; 1483/1599 ; 495/532 ;	missense_variant ; yabM ; c.1483G>A ; p.Val495Met ; 1483/1599 ; 1483/1599 ; 495/532 ;	upstream_gene_variant ; yabN ; c.-106G>A ; . ; . ; . ; . ;	upstream_gene_variant ; hslR ; c.-1578G>A ; . ; . ; . ; . ;	upstream_gene_variant ; spcP ; c.-1917G>A ; . ; . ; . ; . ;	upstream_gene_variant ; spcQ ; c.-2216G>A ; . ; . ; . ; . ;
NC_000964.3	66428	C	G	225	hom	340	340	yabN	gene-BSU_00580	66405	67874	+	synonymous_variant ; yabN ; c.24C>G ; p.Val8Val ; 24/1470 ; 24/1470 ; 8/489 ;	synonymous_variant ; yabN ; c.24C>G ; p.Val8Val ; 24/1470 ; 24/1470 ; 8/489 ;	upstream_gene_variant ; hslR ; c.-1449C>G ; . ; . ; . ; . ;	upstream_gene_variant ; spcP ; c.-1788C>G ; . ; . ; . ; . ;	upstream_gene_variant ; spcQ ; c.-2087C>G ; . ; . ; . ; . ;	upstream_gene_variant ; divIC ; c.-2740C>G ; . ; . ; . ; . ;
NC_000964.3	66455	A	G	225	hom	350	350	yabN	gene-BSU_00580	66405	67874	+	synonymous_variant ; yabN ; c.51A>G ; p.Gln17Gln ; 51/1470 ; 51/1470 ; 17/489 ;	synonymous_variant ; yabN ; c.51A>G ; p.Gln17Gln ; 51/1470 ; 51/1470 ; 17/489 ;	upstream_gene_variant ; hslR ; c.-1422A>G ; . ; . ; . ; . ;	upstream_gene_variant ; spcP ; c.-1761A>G ; . ; . ; . ; . ;	upstream_gene_variant ; spcQ ; c.-2060A>G ; . ; . ; . ; . ;	upstream_gene_variant ; divIC ; c.-2713A>G ; . ; . ; . ; . ;
NC_000964.3	66479	G	A	225	hom	347	347	yabN	gene-BSU_00580	66405	67874	+	synonymous_variant ; yabN ; c.75G>A ; p.Leu25Leu ; 75/1470 ; 75/1470 ; 25/489 ;	synonymous_variant ; yabN ; c.75G>A ; p.Leu25Leu ; 75/1470 ; 75/1470 ; 25/489 ;	upstream_gene_variant ; hslR ; c.-1398G>A ; . ; . ; . ; . ;	upstream_gene_variant ; spcP ; c.-1737G>A ; . ; . ; . ; . ;	upstream_gene_variant ; spcQ ; c.-2036G>A ; . ; . ; . ; . ;	upstream_gene_variant ; divIC ; c.-2689G>A ; . ; . ; . ; . ;
NC_000964.3	66623	A	T	225	hom	202	202	yabN	gene-BSU_00580	66405	67874	+	synonymous_variant ; yabN ; c.219A>T ; p.Ala73Ala ; 219/1470 ; 219/1470 ; 73/489 ;	synonymous_variant ; yabN ; c.219A>T ; p.Ala73Ala ; 219/1470 ; 219/1470 ; 73/489 ;	upstream_gene_variant ; hslR ; c.-1254A>T ; . ; . ; . ; . ;	upstream_gene_variant ; spcP ; c.-1593A>T ; . ; . ; . ; . ;	upstream_gene_variant ; spcQ ; c.-1892A>T ; . ; . ; . ; . ;	upstream_gene_variant ; divIC ; c.-2545A>T ; . ; . ; . ; . ;
NC_000964.3	66665	C	T	225	hom	157	157	yabN	gene-BSU_00580	66405	67874	+	synonymous_variant ; yabN ; c.261C>T ; p.Tyr87Tyr ; 261/1470 ; 261/1470 ; 87/489 ;	synonymous_variant ; yabN ; c.261C>T ; p.Tyr87Tyr ; 261/1470 ; 261/1470 ; 87/489 ;	upstream_gene_variant ; hslR ; c.-1212C>T ; . ; . ; . ; . ;	upstream_gene_variant ; spcP ; c.-1551C>T ; . ; . ; . ; . ;	upstream_gene_variant ; spcQ ; c.-1850C>T ; . ; . ; . ; . ;	upstream_gene_variant ; divIC ; c.-2503C>T ; . ; . ; . ; . ;
NC_000964.3	66677	A	G	225	hom	151	151	yabN	gene-BSU_00580	66405	67874	+	synonymous_variant ; yabN ; c.273A>G ; p.Gly91Gly ; 273/1470 ; 273/1470 ; 91/489 ;	synonymous_variant ; yabN ; c.273A>G ; p.Gly91Gly ; 273/1470 ; 273/1470 ; 91/489 ;	upstream_gene_variant ; hslR ; c.-1200A>G ; . ; . ; . ; . ;	upstream_gene_variant ; spcP ; c.-1539A>G ; . ; . ; . ; . ;	upstream_gene_variant ; spcQ ; c.-1838A>G ; . ; . ; . ; . ;	upstream_gene_variant ; divIC ; c.-2491A>G ; . ; . ; . ; . ;
NC_000964.3	66751	T	C	225	hom	142	142	yabN	gene-BSU_00580	66405	67874	+	missense_variant ; yabN ; c.347T>C ; p.Val116Ala ; 347/1470 ; 347/1470 ; 116/489 ;	missense_variant ; yabN ; c.347T>C ; p.Val116Ala ; 347/1470 ; 347/1470 ; 116/489 ;	upstream_gene_variant ; hslR ; c.-1126T>C ; . ; . ; . ; . ;	upstream_gene_variant ; spcP ; c.-1465T>C ; . ; . ; . ; . ;	upstream_gene_variant ; spcQ ; c.-1764T>C ; . ; . ; . ; . ;	upstream_gene_variant ; divIC ; c.-2417T>C ; . ; . ; . ; . ;
NC_000964.3	66758	G	T	228	hom	141	140	yabN	gene-BSU_00580	66405	67874	+	synonymous_variant ; yabN ; c.354G>T ; p.Gly118Gly ; 354/1470 ; 354/1470 ; 118/489 ;	synonymous_variant ; yabN ; c.354G>T ; p.Gly118Gly ; 354/1470 ; 354/1470 ; 118/489 ;	upstream_gene_variant ; hslR ; c.-1119G>T ; . ; . ; . ; . ;	upstream_gene_variant ; spcP ; c.-1458G>T ; . ; . ; . ; . ;	upstream_gene_variant ; spcQ ; c.-1757G>T ; . ; . ; . ; . ;	upstream_gene_variant ; divIC ; c.-2410G>T ; . ; . ; . ; . ;
NC_000964.3	66790	T	C	225	hom	158	158	yabN	gene-BSU_00580	66405	67874	+	missense_variant ; yabN ; c.386T>C ; p.Val129Ala ; 386/1470 ; 386/1470 ; 129/489 ;	missense_variant ; yabN ; c.386T>C ; p.Val129Ala ; 386/1470 ; 386/1470 ; 129/489 ;	upstream_gene_variant ; hslR ; c.-1087T>C ; . ; . ; . ; . ;	upstream_gene_variant ; spcP ; c.-1426T>C ; . ; . ; . ; . ;	upstream_gene_variant ; spcQ ; c.-1725T>C ; . ; . ; . ; . ;	upstream_gene_variant ; divIC ; c.-2378T>C ; . ; . ; . ; . ;
NC_000964.3	66845	C	T	225	hom	219	219	yabN	gene-BSU_00580	66405	67874	+	synonymous_variant ; yabN ; c.441C>T ; p.Ser147Ser ; 441/1470 ; 441/1470 ; 147/489 ;	synonymous_variant ; yabN ; c.441C>T ; p.Ser147Ser ; 441/1470 ; 441/1470 ; 147/489 ;	upstream_gene_variant ; hslR ; c.-1032C>T ; . ; . ; . ; . ;	upstream_gene_variant ; spcP ; c.-1371C>T ; . ; . ; . ; . ;	upstream_gene_variant ; spcQ ; c.-1670C>T ; . ; . ; . ; . ;	upstream_gene_variant ; divIC ; c.-2323C>T ; . ; . ; . ; . ;
NC_000964.3	67000	G	A	225	hom	334	334	yabN	gene-BSU_00580	66405	67874	+	missense_variant ; yabN ; c.596G>A ; p.Arg199Lys ; 596/1470 ; 596/1470 ; 199/489 ;	missense_variant ; yabN ; c.596G>A ; p.Arg199Lys ; 596/1470 ; 596/1470 ; 199/489 ;	upstream_gene_variant ; hslR ; c.-877G>A ; . ; . ; . ; . ;	upstream_gene_variant ; spcP ; c.-1216G>A ; . ; . ; . ; . ;	upstream_gene_variant ; spcQ ; c.-1515G>A ; . ; . ; . ; . ;	upstream_gene_variant ; divIC ; c.-2168G>A ; . ; . ; . ; . ;
NC_000964.3	67037	T	C	225	hom	318	318	yabN	gene-BSU_00580	66405	67874	+	synonymous_variant ; yabN ; c.633T>C ; p.Ala211Ala ; 633/1470 ; 633/1470 ; 211/489 ;	synonymous_variant ; yabN ; c.633T>C ; p.Ala211Ala ; 633/1470 ; 633/1470 ; 211/489 ;	upstream_gene_variant ; hslR ; c.-840T>C ; . ; . ; . ; . ;	upstream_gene_variant ; spcP ; c.-1179T>C ; . ; . ; . ; . ;	upstream_gene_variant ; spcQ ; c.-1478T>C ; . ; . ; . ; . ;	upstream_gene_variant ; divIC ; c.-2131T>C ; . ; . ; . ; . ;
NC_000964.3	67187	G	A	225	hom	263	263	yabN	gene-BSU_00580	66405	67874	+	synonymous_variant ; yabN ; c.783G>A ; p.Lys261Lys ; 783/1470 ; 783/1470 ; 261/489 ;	synonymous_variant ; yabN ; c.783G>A ; p.Lys261Lys ; 783/1470 ; 783/1470 ; 261/489 ;	upstream_gene_variant ; hslR ; c.-690G>A ; . ; . ; . ; . ;	upstream_gene_variant ; spcP ; c.-1029G>A ; . ; . ; . ; . ;	upstream_gene_variant ; spcQ ; c.-1328G>A ; . ; . ; . ; . ;	upstream_gene_variant ; divIC ; c.-1981G>A ; . ; . ; . ; . ;
NC_000964.3	67424	A	G	225	hom	179	179	yabN	gene-BSU_00580	66405	67874	+	synonymous_variant ; yabN ; c.1020A>G ; p.Leu340Leu ; 1020/1470 ; 1020/1470 ; 340/489 ;	synonymous_variant ; yabN ; c.1020A>G ; p.Leu340Leu ; 1020/1470 ; 1020/1470 ; 340/489 ;	upstream_gene_variant ; hslR ; c.-453A>G ; . ; . ; . ; . ;	upstream_gene_variant ; spcP ; c.-792A>G ; . ; . ; . ; . ;	upstream_gene_variant ; spcQ ; c.-1091A>G ; . ; . ; . ; . ;	upstream_gene_variant ; divIC ; c.-1744A>G ; . ; . ; . ; . ;
NC_000964.3	67475	A	G	225	hom	159	159	yabN	gene-BSU_00580	66405	67874	+	synonymous_variant ; yabN ; c.1071A>G ; p.Ser357Ser ; 1071/1470 ; 1071/1470 ; 357/489 ;	synonymous_variant ; yabN ; c.1071A>G ; p.Ser357Ser ; 1071/1470 ; 1071/1470 ; 357/489 ;	upstream_gene_variant ; hslR ; c.-402A>G ; . ; . ; . ; . ;	upstream_gene_variant ; spcP ; c.-741A>G ; . ; . ; . ; . ;	upstream_gene_variant ; spcQ ; c.-1040A>G ; . ; . ; . ; . ;	upstream_gene_variant ; divIC ; c.-1693A>G ; . ; . ; . ; . ;
NC_000964.3	67520	A	T	225	hom	160	160	yabN	gene-BSU_00580	66405	67874	+	synonymous_variant ; yabN ; c.1116A>T ; p.Ala372Ala ; 1116/1470 ; 1116/1470 ; 372/489 ;	synonymous_variant ; yabN ; c.1116A>T ; p.Ala372Ala ; 1116/1470 ; 1116/1470 ; 372/489 ;	upstream_gene_variant ; hslR ; c.-357A>T ; . ; . ; . ; . ;	upstream_gene_variant ; spcP ; c.-696A>T ; . ; . ; . ; . ;	upstream_gene_variant ; spcQ ; c.-995A>T ; . ; . ; . ; . ;	upstream_gene_variant ; divIC ; c.-1648A>T ; . ; . ; . ; . ;
NC_000964.3	67643	A	C	225	hom	150	150	yabN	gene-BSU_00580	66405	67874	+	missense_variant ; yabN ; c.1239A>C ; p.Glu413Asp ; 1239/1470 ; 1239/1470 ; 413/489 ;	missense_variant ; yabN ; c.1239A>C ; p.Glu413Asp ; 1239/1470 ; 1239/1470 ; 413/489 ;	upstream_gene_variant ; hslR ; c.-234A>C ; . ; . ; . ; . ;	upstream_gene_variant ; spcP ; c.-573A>C ; . ; . ; . ; . ;	upstream_gene_variant ; spcQ ; c.-872A>C ; . ; . ; . ; . ;	upstream_gene_variant ; divIC ; c.-1525A>C ; . ; . ; . ; . ;
NC_000964.3	67760	G	C	225	hom	271	271	yabN	gene-BSU_00580	66405	67874	+	synonymous_variant ; yabN ; c.1356G>C ; p.Arg452Arg ; 1356/1470 ; 1356/1470 ; 452/489 ;	synonymous_variant ; yabN ; c.1356G>C ; p.Arg452Arg ; 1356/1470 ; 1356/1470 ; 452/489 ;	upstream_gene_variant ; hslR ; c.-117G>C ; . ; . ; . ; . ;	upstream_gene_variant ; spcP ; c.-456G>C ; . ; . ; . ; . ;	upstream_gene_variant ; spcQ ; c.-755G>C ; . ; . ; . ; . ;	upstream_gene_variant ; divIC ; c.-1408G>C ; . ; . ; . ; . ;
NC_000964.3	67791	G	A	225	hom	318	318	yabN	gene-BSU_00580	66405	67874	+	missense_variant ; yabN ; c.1387G>A ; p.Glu463Lys ; 1387/1470 ; 1387/1470 ; 463/489 ;	missense_variant ; yabN ; c.1387G>A ; p.Glu463Lys ; 1387/1470 ; 1387/1470 ; 463/489 ;	upstream_gene_variant ; hslR ; c.-86G>A ; . ; . ; . ; . ;	upstream_gene_variant ; spcP ; c.-425G>A ; . ; . ; . ; . ;	upstream_gene_variant ; spcQ ; c.-724G>A ; . ; . ; . ; . ;	upstream_gene_variant ; divIC ; c.-1377G>A ; . ; . ; . ; . ;
NC_000964.3	67987	T	A	225	hom	475	475	hslR	gene-BSU_00590	67877	68137	+	synonymous_variant ; hslR ; c.111T>A ; p.Ala37Ala ; 111/261 ; 111/261 ; 37/86 ;	synonymous_variant ; hslR ; c.111T>A ; p.Ala37Ala ; 111/261 ; 111/261 ; 37/86 ;	upstream_gene_variant ; spcP ; c.-229T>A ; . ; . ; . ; . ;	upstream_gene_variant ; spcQ ; c.-528T>A ; . ; . ; . ; . ;	upstream_gene_variant ; divIC ; c.-1181T>A ; . ; . ; . ; . ;	upstream_gene_variant ; yabR ; c.-1639T>A ; . ; . ; . ; . ;
NC_000964.3	68154	C	T	225	hom	344	344	.	.	.	.	.	.	upstream_gene_variant ; spcP ; c.-62C>T ; . ; . ; . ; . ;	upstream_gene_variant ; spcQ ; c.-361C>T ; . ; . ; . ; . ;	upstream_gene_variant ; divIC ; c.-1014C>T ; . ; . ; . ; . ;	upstream_gene_variant ; yabR ; c.-1472C>T ; . ; . ; . ; . ;	upstream_gene_variant ; trnSL-Met1 ; c.-2027C>T ; . ; . ; . ; . ;
NC_000964.3	68159	C	T	225	hom	343	343	.	.	.	.	.	.	upstream_gene_variant ; spcP ; c.-57C>T ; . ; . ; . ; . ;	upstream_gene_variant ; spcQ ; c.-356C>T ; . ; . ; . ; . ;	upstream_gene_variant ; divIC ; c.-1009C>T ; . ; . ; . ; . ;	upstream_gene_variant ; yabR ; c.-1467C>T ; . ; . ; . ; . ;	upstream_gene_variant ; trnSL-Met1 ; c.-2022C>T ; . ; . ; . ; . ;
NC_000964.3	68263	G	A	225	hom	255	255	spcP	gene-BSU_00600	68216	68518	+	synonymous_variant ; spcP ; c.48G>A ; p.Gln16Gln ; 48/303 ; 48/303 ; 16/100 ;	synonymous_variant ; spcP ; c.48G>A ; p.Gln16Gln ; 48/303 ; 48/303 ; 16/100 ;	upstream_gene_variant ; spcQ ; c.-252G>A ; . ; . ; . ; . ;	upstream_gene_variant ; divIC ; c.-905G>A ; . ; . ; . ; . ;	upstream_gene_variant ; yabR ; c.-1363G>A ; . ; . ; . ; . ;	upstream_gene_variant ; trnSL-Met1 ; c.-1918G>A ; . ; . ; . ; . ;
NC_000964.3	68547	A	G	225	hom	188	188	spcQ	gene-BSU_00610	68515	69150	+	synonymous_variant ; spcQ ; c.33A>G ; p.Leu11Leu ; 33/636 ; 33/636 ; 11/211 ;	synonymous_variant ; spcQ ; c.33A>G ; p.Leu11Leu ; 33/636 ; 33/636 ; 11/211 ;	upstream_gene_variant ; divIC ; c.-621A>G ; . ; . ; . ; . ;	upstream_gene_variant ; yabR ; c.-1079A>G ; . ; . ; . ; . ;	upstream_gene_variant ; trnSL-Met1 ; c.-1634A>G ; . ; . ; . ; . ;	upstream_gene_variant ; trnSL-Glu1 ; c.-1720A>G ; . ; . ; . ; . ;
NC_000964.3	68665	A	G	225	hom	195	195	spcQ	gene-BSU_00610	68515	69150	+	missense_variant ; spcQ ; c.151A>G ; p.Met51Val ; 151/636 ; 151/636 ; 51/211 ;	missense_variant ; spcQ ; c.151A>G ; p.Met51Val ; 151/636 ; 151/636 ; 51/211 ;	upstream_gene_variant ; divIC ; c.-503A>G ; . ; . ; . ; . ;	upstream_gene_variant ; yabR ; c.-961A>G ; . ; . ; . ; . ;	upstream_gene_variant ; trnSL-Met1 ; c.-1516A>G ; . ; . ; . ; . ;	upstream_gene_variant ; trnSL-Glu1 ; c.-1602A>G ; . ; . ; . ; . ;
NC_000964.3	68806	G	T	225	hom	132	132	spcQ	gene-BSU_00610	68515	69150	+	missense_variant ; spcQ ; c.292G>T ; p.Val98Phe ; 292/636 ; 292/636 ; 98/211 ;	missense_variant ; spcQ ; c.292G>T ; p.Val98Phe ; 292/636 ; 292/636 ; 98/211 ;	upstream_gene_variant ; divIC ; c.-362G>T ; . ; . ; . ; . ;	upstream_gene_variant ; yabR ; c.-820G>T ; . ; . ; . ; . ;	upstream_gene_variant ; trnSL-Met1 ; c.-1375G>T ; . ; . ; . ; . ;	upstream_gene_variant ; trnSL-Glu1 ; c.-1461G>T ; . ; . ; . ; . ;
NC_000964.3	69129	C	T	225	hom	126	126	spcQ	gene-BSU_00610	68515	69150	+	synonymous_variant ; spcQ ; c.615C>T ; p.Ile205Ile ; 615/636 ; 615/636 ; 205/211 ;	synonymous_variant ; spcQ ; c.615C>T ; p.Ile205Ile ; 615/636 ; 615/636 ; 205/211 ;	upstream_gene_variant ; divIC ; c.-39C>T ; . ; . ; . ; . ;	upstream_gene_variant ; yabR ; c.-497C>T ; . ; . ; . ; . ;	upstream_gene_variant ; trnSL-Met1 ; c.-1052C>T ; . ; . ; . ; . ;	upstream_gene_variant ; trnSL-Glu1 ; c.-1138C>T ; . ; . ; . ; . ;
NC_000964.3	69146	G	A	225	hom	136	136	spcQ	gene-BSU_00610	68515	69150	+	missense_variant ; spcQ ; c.632G>A ; p.Arg211Lys ; 632/636 ; 632/636 ; 211/211 ;	missense_variant ; spcQ ; c.632G>A ; p.Arg211Lys ; 632/636 ; 632/636 ; 211/211 ;	upstream_gene_variant ; divIC ; c.-22G>A ; . ; . ; . ; . ;	upstream_gene_variant ; yabR ; c.-480G>A ; . ; . ; . ; . ;	upstream_gene_variant ; trnSL-Met1 ; c.-1035G>A ; . ; . ; . ; . ;	upstream_gene_variant ; trnSL-Glu1 ; c.-1121G>A ; . ; . ; . ; . ;
NC_000964.3	69398	G	C	225	hom	219	219	divIC	gene-BSU_00620	69168	69545	+	synonymous_variant ; divIC ; c.231G>C ; p.Leu77Leu ; 231/378 ; 231/378 ; 77/125 ;	synonymous_variant ; divIC ; c.231G>C ; p.Leu77Leu ; 231/378 ; 231/378 ; 77/125 ;	upstream_gene_variant ; yabR ; c.-228G>C ; . ; . ; . ; . ;	upstream_gene_variant ; trnSL-Met1 ; c.-783G>C ; . ; . ; . ; . ;	upstream_gene_variant ; trnSL-Glu1 ; c.-869G>C ; . ; . ; . ; . ;	upstream_gene_variant ; spoIIE ; c.-1140G>C ; . ; . ; . ; . ;
NC_000964.3	69452	G	A	225	hom	170	170	divIC	gene-BSU_00620	69168	69545	+	synonymous_variant ; divIC ; c.285G>A ; p.Lys95Lys ; 285/378 ; 285/378 ; 95/125 ;	synonymous_variant ; divIC ; c.285G>A ; p.Lys95Lys ; 285/378 ; 285/378 ; 95/125 ;	upstream_gene_variant ; yabR ; c.-174G>A ; . ; . ; . ; . ;	upstream_gene_variant ; trnSL-Met1 ; c.-729G>A ; . ; . ; . ; . ;	upstream_gene_variant ; trnSL-Glu1 ; c.-815G>A ; . ; . ; . ; . ;	upstream_gene_variant ; spoIIE ; c.-1086G>A ; . ; . ; . ; . ;
NC_000964.3	70081	T	C	225	hom	80	80	.	.	.	.	.	.	upstream_gene_variant ; trnSL-Met1 ; c.-100T>C ; . ; . ; . ; . ;	upstream_gene_variant ; trnSL-Glu1 ; c.-186T>C ; . ; . ; . ; . ;	upstream_gene_variant ; spoIIE ; c.-457T>C ; . ; . ; . ; . ;	upstream_gene_variant ; yabS ; c.-3025T>C ; . ; . ; . ; . ;	upstream_gene_variant ; prkT ; c.-3728T>C ; . ; . ; . ; . ;
NC_000964.3	70345	C	A	225	hom	152	152	.	.	.	.	.	.	upstream_gene_variant ; spoIIE ; c.-193C>A ; . ; . ; . ; . ;	upstream_gene_variant ; yabS ; c.-2761C>A ; . ; . ; . ; . ;	upstream_gene_variant ; prkT ; c.-3464C>A ; . ; . ; . ; . ;	upstream_gene_variant ; tilS ; c.-4584C>A ; . ; . ; . ; . ;	downstream_gene_variant ; yabM ; c.*3930C>A ; . ; . ; . ; . ;
NC_000964.3	70822	A	T	228	hom	238	237	spoIIE	gene-BSU_00640	70538	73021	+	synonymous_variant ; spoIIE ; c.285A>T ; p.Ile95Ile ; 285/2484 ; 285/2484 ; 95/827 ;	synonymous_variant ; spoIIE ; c.285A>T ; p.Ile95Ile ; 285/2484 ; 285/2484 ; 95/827 ;	upstream_gene_variant ; yabS ; c.-2284A>T ; . ; . ; . ; . ;	upstream_gene_variant ; prkT ; c.-2987A>T ; . ; . ; . ; . ;	upstream_gene_variant ; tilS ; c.-4107A>T ; . ; . ; . ; . ;	downstream_gene_variant ; yabM ; c.*4407A>T ; . ; . ; . ; . ;
NC_000964.3	70912	T	A	225	hom	205	205	spoIIE	gene-BSU_00640	70538	73021	+	synonymous_variant ; spoIIE ; c.375T>A ; p.Val125Val ; 375/2484 ; 375/2484 ; 125/827 ;	synonymous_variant ; spoIIE ; c.375T>A ; p.Val125Val ; 375/2484 ; 375/2484 ; 125/827 ;	upstream_gene_variant ; yabS ; c.-2194T>A ; . ; . ; . ; . ;	upstream_gene_variant ; prkT ; c.-2897T>A ; . ; . ; . ; . ;	upstream_gene_variant ; tilS ; c.-4017T>A ; . ; . ; . ; . ;	downstream_gene_variant ; yabM ; c.*4497T>A ; . ; . ; . ; . ;
NC_000964.3	70918	G	A	225	hom	207	207	spoIIE	gene-BSU_00640	70538	73021	+	synonymous_variant ; spoIIE ; c.381G>A ; p.Ala127Ala ; 381/2484 ; 381/2484 ; 127/827 ;	synonymous_variant ; spoIIE ; c.381G>A ; p.Ala127Ala ; 381/2484 ; 381/2484 ; 127/827 ;	upstream_gene_variant ; yabS ; c.-2188G>A ; . ; . ; . ; . ;	upstream_gene_variant ; prkT ; c.-2891G>A ; . ; . ; . ; . ;	upstream_gene_variant ; tilS ; c.-4011G>A ; . ; . ; . ; . ;	downstream_gene_variant ; yabM ; c.*4503G>A ; . ; . ; . ; . ;
NC_000964.3	71164	T	C	225	hom	135	135	spoIIE	gene-BSU_00640	70538	73021	+	synonymous_variant ; spoIIE ; c.627T>C ; p.Ala209Ala ; 627/2484 ; 627/2484 ; 209/827 ;	synonymous_variant ; spoIIE ; c.627T>C ; p.Ala209Ala ; 627/2484 ; 627/2484 ; 209/827 ;	upstream_gene_variant ; yabS ; c.-1942T>C ; . ; . ; . ; . ;	upstream_gene_variant ; prkT ; c.-2645T>C ; . ; . ; . ; . ;	upstream_gene_variant ; tilS ; c.-3765T>C ; . ; . ; . ; . ;	downstream_gene_variant ; yabM ; c.*4749T>C ; . ; . ; . ; . ;
NC_000964.3	71218	G	A	225	hom	153	153	spoIIE	gene-BSU_00640	70538	73021	+	synonymous_variant ; spoIIE ; c.681G>A ; p.Val227Val ; 681/2484 ; 681/2484 ; 227/827 ;	synonymous_variant ; spoIIE ; c.681G>A ; p.Val227Val ; 681/2484 ; 681/2484 ; 227/827 ;	upstream_gene_variant ; yabS ; c.-1888G>A ; . ; . ; . ; . ;	upstream_gene_variant ; prkT ; c.-2591G>A ; . ; . ; . ; . ;	upstream_gene_variant ; tilS ; c.-3711G>A ; . ; . ; . ; . ;	downstream_gene_variant ; yabM ; c.*4803G>A ; . ; . ; . ; . ;
NC_000964.3	71266	G	T	228	hom	159	158	spoIIE	gene-BSU_00640	70538	73021	+	synonymous_variant ; spoIIE ; c.729G>T ; p.Gly243Gly ; 729/2484 ; 729/2484 ; 243/827 ;	synonymous_variant ; spoIIE ; c.729G>T ; p.Gly243Gly ; 729/2484 ; 729/2484 ; 243/827 ;	upstream_gene_variant ; yabS ; c.-1840G>T ; . ; . ; . ; . ;	upstream_gene_variant ; prkT ; c.-2543G>T ; . ; . ; . ; . ;	upstream_gene_variant ; tilS ; c.-3663G>T ; . ; . ; . ; . ;	downstream_gene_variant ; yabM ; c.*4851G>T ; . ; . ; . ; . ;
NC_000964.3	71359	G	T	225	hom	139	139	spoIIE	gene-BSU_00640	70538	73021	+	synonymous_variant ; spoIIE ; c.822G>T ; p.Leu274Leu ; 822/2484 ; 822/2484 ; 274/827 ;	synonymous_variant ; spoIIE ; c.822G>T ; p.Leu274Leu ; 822/2484 ; 822/2484 ; 274/827 ;	upstream_gene_variant ; yabS ; c.-1747G>T ; . ; . ; . ; . ;	upstream_gene_variant ; prkT ; c.-2450G>T ; . ; . ; . ; . ;	upstream_gene_variant ; tilS ; c.-3570G>T ; . ; . ; . ; . ;	upstream_gene_variant ; hprT ; c.-4985G>T ; . ; . ; . ; . ;
NC_000964.3	71480	T	G	225	hom	164	164	spoIIE	gene-BSU_00640	70538	73021	+	missense_variant ; spoIIE ; c.943T>G ; p.Cys315Gly ; 943/2484 ; 943/2484 ; 315/827 ;	missense_variant ; spoIIE ; c.943T>G ; p.Cys315Gly ; 943/2484 ; 943/2484 ; 315/827 ;	upstream_gene_variant ; yabS ; c.-1626T>G ; . ; . ; . ; . ;	upstream_gene_variant ; prkT ; c.-2329T>G ; . ; . ; . ; . ;	upstream_gene_variant ; tilS ; c.-3449T>G ; . ; . ; . ; . ;	upstream_gene_variant ; hprT ; c.-4864T>G ; . ; . ; . ; . ;
NC_000964.3	71512	G	A	225	hom	173	173	spoIIE	gene-BSU_00640	70538	73021	+	synonymous_variant ; spoIIE ; c.975G>A ; p.Thr325Thr ; 975/2484 ; 975/2484 ; 325/827 ;	synonymous_variant ; spoIIE ; c.975G>A ; p.Thr325Thr ; 975/2484 ; 975/2484 ; 325/827 ;	upstream_gene_variant ; yabS ; c.-1594G>A ; . ; . ; . ; . ;	upstream_gene_variant ; prkT ; c.-2297G>A ; . ; . ; . ; . ;	upstream_gene_variant ; tilS ; c.-3417G>A ; . ; . ; . ; . ;	upstream_gene_variant ; hprT ; c.-4832G>A ; . ; . ; . ; . ;
NC_000964.3	71614	A	G	225	hom	195	195	spoIIE	gene-BSU_00640	70538	73021	+	synonymous_variant ; spoIIE ; c.1077A>G ; p.Gln359Gln ; 1077/2484 ; 1077/2484 ; 359/827 ;	synonymous_variant ; spoIIE ; c.1077A>G ; p.Gln359Gln ; 1077/2484 ; 1077/2484 ; 359/827 ;	upstream_gene_variant ; yabS ; c.-1492A>G ; . ; . ; . ; . ;	upstream_gene_variant ; prkT ; c.-2195A>G ; . ; . ; . ; . ;	upstream_gene_variant ; tilS ; c.-3315A>G ; . ; . ; . ; . ;	upstream_gene_variant ; hprT ; c.-4730A>G ; . ; . ; . ; . ;
NC_000964.3	71662	T	C	225	hom	196	196	spoIIE	gene-BSU_00640	70538	73021	+	synonymous_variant ; spoIIE ; c.1125T>C ; p.Tyr375Tyr ; 1125/2484 ; 1125/2484 ; 375/827 ;	synonymous_variant ; spoIIE ; c.1125T>C ; p.Tyr375Tyr ; 1125/2484 ; 1125/2484 ; 375/827 ;	upstream_gene_variant ; yabS ; c.-1444T>C ; . ; . ; . ; . ;	upstream_gene_variant ; prkT ; c.-2147T>C ; . ; . ; . ; . ;	upstream_gene_variant ; tilS ; c.-3267T>C ; . ; . ; . ; . ;	upstream_gene_variant ; hprT ; c.-4682T>C ; . ; . ; . ; . ;
NC_000964.3	71734	C	T	225	hom	207	207	spoIIE	gene-BSU_00640	70538	73021	+	synonymous_variant ; spoIIE ; c.1197C>T ; p.Cys399Cys ; 1197/2484 ; 1197/2484 ; 399/827 ;	synonymous_variant ; spoIIE ; c.1197C>T ; p.Cys399Cys ; 1197/2484 ; 1197/2484 ; 399/827 ;	upstream_gene_variant ; yabS ; c.-1372C>T ; . ; . ; . ; . ;	upstream_gene_variant ; prkT ; c.-2075C>T ; . ; . ; . ; . ;	upstream_gene_variant ; tilS ; c.-3195C>T ; . ; . ; . ; . ;	upstream_gene_variant ; hprT ; c.-4610C>T ; . ; . ; . ; . ;
NC_000964.3	71791	C	T	225	hom	195	195	spoIIE	gene-BSU_00640	70538	73021	+	synonymous_variant ; spoIIE ; c.1254C>T ; p.Asp418Asp ; 1254/2484 ; 1254/2484 ; 418/827 ;	synonymous_variant ; spoIIE ; c.1254C>T ; p.Asp418Asp ; 1254/2484 ; 1254/2484 ; 418/827 ;	upstream_gene_variant ; yabS ; c.-1315C>T ; . ; . ; . ; . ;	upstream_gene_variant ; prkT ; c.-2018C>T ; . ; . ; . ; . ;	upstream_gene_variant ; tilS ; c.-3138C>T ; . ; . ; . ; . ;	upstream_gene_variant ; hprT ; c.-4553C>T ; . ; . ; . ; . ;
NC_000964.3	72049	A	G	225	hom	141	141	spoIIE	gene-BSU_00640	70538	73021	+	synonymous_variant ; spoIIE ; c.1512A>G ; p.Gln504Gln ; 1512/2484 ; 1512/2484 ; 504/827 ;	synonymous_variant ; spoIIE ; c.1512A>G ; p.Gln504Gln ; 1512/2484 ; 1512/2484 ; 504/827 ;	upstream_gene_variant ; yabS ; c.-1057A>G ; . ; . ; . ; . ;	upstream_gene_variant ; prkT ; c.-1760A>G ; . ; . ; . ; . ;	upstream_gene_variant ; tilS ; c.-2880A>G ; . ; . ; . ; . ;	upstream_gene_variant ; hprT ; c.-4295A>G ; . ; . ; . ; . ;
NC_000964.3	72226	G	A	225	hom	307	307	spoIIE	gene-BSU_00640	70538	73021	+	synonymous_variant ; spoIIE ; c.1689G>A ; p.Glu563Glu ; 1689/2484 ; 1689/2484 ; 563/827 ;	synonymous_variant ; spoIIE ; c.1689G>A ; p.Glu563Glu ; 1689/2484 ; 1689/2484 ; 563/827 ;	upstream_gene_variant ; yabS ; c.-880G>A ; . ; . ; . ; . ;	upstream_gene_variant ; prkT ; c.-1583G>A ; . ; . ; . ; . ;	upstream_gene_variant ; tilS ; c.-2703G>A ; . ; . ; . ; . ;	upstream_gene_variant ; hprT ; c.-4118G>A ; . ; . ; . ; . ;
NC_000964.3	72364	T	C	225	hom	443	443	spoIIE	gene-BSU_00640	70538	73021	+	synonymous_variant ; spoIIE ; c.1827T>C ; p.Gly609Gly ; 1827/2484 ; 1827/2484 ; 609/827 ;	synonymous_variant ; spoIIE ; c.1827T>C ; p.Gly609Gly ; 1827/2484 ; 1827/2484 ; 609/827 ;	upstream_gene_variant ; yabS ; c.-742T>C ; . ; . ; . ; . ;	upstream_gene_variant ; prkT ; c.-1445T>C ; . ; . ; . ; . ;	upstream_gene_variant ; tilS ; c.-2565T>C ; . ; . ; . ; . ;	upstream_gene_variant ; hprT ; c.-3980T>C ; . ; . ; . ; . ;
NC_000964.3	72499	C	A	225	hom	303	303	spoIIE	gene-BSU_00640	70538	73021	+	synonymous_variant ; spoIIE ; c.1962C>A ; p.Gly654Gly ; 1962/2484 ; 1962/2484 ; 654/827 ;	synonymous_variant ; spoIIE ; c.1962C>A ; p.Gly654Gly ; 1962/2484 ; 1962/2484 ; 654/827 ;	upstream_gene_variant ; yabS ; c.-607C>A ; . ; . ; . ; . ;	upstream_gene_variant ; prkT ; c.-1310C>A ; . ; . ; . ; . ;	upstream_gene_variant ; tilS ; c.-2430C>A ; . ; . ; . ; . ;	upstream_gene_variant ; hprT ; c.-3845C>A ; . ; . ; . ; . ;
NC_000964.3	72610	C	T	225	hom	189	189	spoIIE	gene-BSU_00640	70538	73021	+	synonymous_variant ; spoIIE ; c.2073C>T ; p.Ser691Ser ; 2073/2484 ; 2073/2484 ; 691/827 ;	synonymous_variant ; spoIIE ; c.2073C>T ; p.Ser691Ser ; 2073/2484 ; 2073/2484 ; 691/827 ;	upstream_gene_variant ; yabS ; c.-496C>T ; . ; . ; . ; . ;	upstream_gene_variant ; prkT ; c.-1199C>T ; . ; . ; . ; . ;	upstream_gene_variant ; tilS ; c.-2319C>T ; . ; . ; . ; . ;	upstream_gene_variant ; hprT ; c.-3734C>T ; . ; . ; . ; . ;
NC_000964.3	72640	C	T	225	hom	179	179	spoIIE	gene-BSU_00640	70538	73021	+	synonymous_variant ; spoIIE ; c.2103C>T ; p.Pro701Pro ; 2103/2484 ; 2103/2484 ; 701/827 ;	synonymous_variant ; spoIIE ; c.2103C>T ; p.Pro701Pro ; 2103/2484 ; 2103/2484 ; 701/827 ;	upstream_gene_variant ; yabS ; c.-466C>T ; . ; . ; . ; . ;	upstream_gene_variant ; prkT ; c.-1169C>T ; . ; . ; . ; . ;	upstream_gene_variant ; tilS ; c.-2289C>T ; . ; . ; . ; . ;	upstream_gene_variant ; hprT ; c.-3704C>T ; . ; . ; . ; . ;
NC_000964.3	72740	C	T	225	hom	182	182	spoIIE	gene-BSU_00640	70538	73021	+	synonymous_variant ; spoIIE ; c.2203C>T ; p.Leu735Leu ; 2203/2484 ; 2203/2484 ; 735/827 ;	synonymous_variant ; spoIIE ; c.2203C>T ; p.Leu735Leu ; 2203/2484 ; 2203/2484 ; 735/827 ;	upstream_gene_variant ; yabS ; c.-366C>T ; . ; . ; . ; . ;	upstream_gene_variant ; prkT ; c.-1069C>T ; . ; . ; . ; . ;	upstream_gene_variant ; tilS ; c.-2189C>T ; . ; . ; . ; . ;	upstream_gene_variant ; hprT ; c.-3604C>T ; . ; . ; . ; . ;
NC_000964.3	73357	G	A	225	hom	222	222	yabS	gene-BSU_00650	73106	73843	+	synonymous_variant ; yabS ; c.252G>A ; p.Lys84Lys ; 252/738 ; 252/738 ; 84/245 ;	synonymous_variant ; yabS ; c.252G>A ; p.Lys84Lys ; 252/738 ; 252/738 ; 84/245 ;	upstream_gene_variant ; prkT ; c.-452G>A ; . ; . ; . ; . ;	upstream_gene_variant ; tilS ; c.-1572G>A ; . ; . ; . ; . ;	upstream_gene_variant ; hprT ; c.-2987G>A ; . ; . ; . ; . ;	upstream_gene_variant ; ftsH ; c.-3627G>A ; . ; . ; . ; . ;
NC_000964.3	73606	T	C	225	hom	161	161	yabS	gene-BSU_00650	73106	73843	+	synonymous_variant ; yabS ; c.501T>C ; p.Ile167Ile ; 501/738 ; 501/738 ; 167/245 ;	synonymous_variant ; yabS ; c.501T>C ; p.Ile167Ile ; 501/738 ; 501/738 ; 167/245 ;	upstream_gene_variant ; prkT ; c.-203T>C ; . ; . ; . ; . ;	upstream_gene_variant ; tilS ; c.-1323T>C ; . ; . ; . ; . ;	upstream_gene_variant ; hprT ; c.-2738T>C ; . ; . ; . ; . ;	upstream_gene_variant ; ftsH ; c.-3378T>C ; . ; . ; . ; . ;
NC_000964.3	73947	A	G	225	hom	172	172	prkT	gene-BSU_00660	73809	74825	+	missense_variant ; prkT ; c.139A>G ; p.Thr47Ala ; 139/1017 ; 139/1017 ; 47/338 ;	missense_variant ; prkT ; c.139A>G ; p.Thr47Ala ; 139/1017 ; 139/1017 ; 47/338 ;	upstream_gene_variant ; tilS ; c.-982A>G ; . ; . ; . ; . ;	upstream_gene_variant ; hprT ; c.-2397A>G ; . ; . ; . ; . ;	upstream_gene_variant ; ftsH ; c.-3037A>G ; . ; . ; . ; . ;	downstream_gene_variant ; spcQ ; c.*4797A>G ; . ; . ; . ; . ;
NC_000964.3	74186	G	T	225	hom	220	220	prkT	gene-BSU_00660	73809	74825	+	synonymous_variant ; prkT ; c.378G>T ; p.Pro126Pro ; 378/1017 ; 378/1017 ; 126/338 ;	synonymous_variant ; prkT ; c.378G>T ; p.Pro126Pro ; 378/1017 ; 378/1017 ; 126/338 ;	upstream_gene_variant ; tilS ; c.-743G>T ; . ; . ; . ; . ;	upstream_gene_variant ; hprT ; c.-2158G>T ; . ; . ; . ; . ;	upstream_gene_variant ; ftsH ; c.-2798G>T ; . ; . ; . ; . ;	upstream_gene_variant ; coaX ; c.-4906G>T ; . ; . ; . ; . ;
NC_000964.3	74622	G	T	225	hom	163	163	prkT	gene-BSU_00660	73809	74825	+	missense_variant ; prkT ; c.814G>T ; p.Ala272Ser ; 814/1017 ; 814/1017 ; 272/338 ;	missense_variant ; prkT ; c.814G>T ; p.Ala272Ser ; 814/1017 ; 814/1017 ; 272/338 ;	upstream_gene_variant ; tilS ; c.-307G>T ; . ; . ; . ; . ;	upstream_gene_variant ; hprT ; c.-1722G>T ; . ; . ; . ; . ;	upstream_gene_variant ; ftsH ; c.-2362G>T ; . ; . ; . ; . ;	upstream_gene_variant ; coaX ; c.-4470G>T ; . ; . ; . ; . ;
NC_000964.3	74629	G	A	225	hom	159	159	prkT	gene-BSU_00660	73809	74825	+	missense_variant ; prkT ; c.821G>A ; p.Arg274Lys ; 821/1017 ; 821/1017 ; 274/338 ;	missense_variant ; prkT ; c.821G>A ; p.Arg274Lys ; 821/1017 ; 821/1017 ; 274/338 ;	upstream_gene_variant ; tilS ; c.-300G>A ; . ; . ; . ; . ;	upstream_gene_variant ; hprT ; c.-1715G>A ; . ; . ; . ; . ;	upstream_gene_variant ; ftsH ; c.-2355G>A ; . ; . ; . ; . ;	upstream_gene_variant ; coaX ; c.-4463G>A ; . ; . ; . ; . ;
NC_000964.3	74683	A	T	225	hom	149	149	prkT	gene-BSU_00660	73809	74825	+	missense_variant ; prkT ; c.875A>T ; p.Lys292Ile ; 875/1017 ; 875/1017 ; 292/338 ;	missense_variant ; prkT ; c.875A>T ; p.Lys292Ile ; 875/1017 ; 875/1017 ; 292/338 ;	upstream_gene_variant ; tilS ; c.-246A>T ; . ; . ; . ; . ;	upstream_gene_variant ; hprT ; c.-1661A>T ; . ; . ; . ; . ;	upstream_gene_variant ; ftsH ; c.-2301A>T ; . ; . ; . ; . ;	upstream_gene_variant ; coaX ; c.-4409A>T ; . ; . ; . ; . ;
NC_000964.3	74830	T	C	225	hom	68	68	.	.	.	.	.	.	upstream_gene_variant ; tilS ; c.-99T>C ; . ; . ; . ; . ;	upstream_gene_variant ; hprT ; c.-1514T>C ; . ; . ; . ; . ;	upstream_gene_variant ; ftsH ; c.-2154T>C ; . ; . ; . ; . ;	upstream_gene_variant ; coaX ; c.-4262T>C ; . ; . ; . ; . ;	downstream_gene_variant ; yabR ; c.*4818T>C ; . ; . ; . ; . ;
NC_000964.3	75035	C	T	225	hom	149	149	tilS	gene-BSU_00670	74929	76347	+	missense_variant ; tilS ; c.107C>T ; p.Ala36Val ; 107/1419 ; 107/1419 ; 36/472 ;	missense_variant ; tilS ; c.107C>T ; p.Ala36Val ; 107/1419 ; 107/1419 ; 36/472 ;	upstream_gene_variant ; hprT ; c.-1309C>T ; . ; . ; . ; . ;	upstream_gene_variant ; ftsH ; c.-1949C>T ; . ; . ; . ; . ;	upstream_gene_variant ; coaX ; c.-4057C>T ; . ; . ; . ; . ;	upstream_gene_variant ; hslO ; c.-4845C>T ; . ; . ; . ; . ;
NC_000964.3	75357	T	C	225	hom	259	259	tilS	gene-BSU_00670	74929	76347	+	synonymous_variant ; tilS ; c.429T>C ; p.Leu143Leu ; 429/1419 ; 429/1419 ; 143/472 ;	synonymous_variant ; tilS ; c.429T>C ; p.Leu143Leu ; 429/1419 ; 429/1419 ; 143/472 ;	upstream_gene_variant ; hprT ; c.-987T>C ; . ; . ; . ; . ;	upstream_gene_variant ; ftsH ; c.-1627T>C ; . ; . ; . ; . ;	upstream_gene_variant ; coaX ; c.-3735T>C ; . ; . ; . ; . ;	upstream_gene_variant ; hslO ; c.-4523T>C ; . ; . ; . ; . ;
NC_000964.3	75402	A	G	225	hom	238	238	tilS	gene-BSU_00670	74929	76347	+	synonymous_variant ; tilS ; c.474A>G ; p.Thr158Thr ; 474/1419 ; 474/1419 ; 158/472 ;	synonymous_variant ; tilS ; c.474A>G ; p.Thr158Thr ; 474/1419 ; 474/1419 ; 158/472 ;	upstream_gene_variant ; hprT ; c.-942A>G ; . ; . ; . ; . ;	upstream_gene_variant ; ftsH ; c.-1582A>G ; . ; . ; . ; . ;	upstream_gene_variant ; coaX ; c.-3690A>G ; . ; . ; . ; . ;	upstream_gene_variant ; hslO ; c.-4478A>G ; . ; . ; . ; . ;
NC_000964.3	75427	A	C	225	hom	233	233	tilS	gene-BSU_00670	74929	76347	+	missense_variant ; tilS ; c.499A>C ; p.Thr167Pro ; 499/1419 ; 499/1419 ; 167/472 ;	missense_variant ; tilS ; c.499A>C ; p.Thr167Pro ; 499/1419 ; 499/1419 ; 167/472 ;	upstream_gene_variant ; hprT ; c.-917A>C ; . ; . ; . ; . ;	upstream_gene_variant ; ftsH ; c.-1557A>C ; . ; . ; . ; . ;	upstream_gene_variant ; coaX ; c.-3665A>C ; . ; . ; . ; . ;	upstream_gene_variant ; hslO ; c.-4453A>C ; . ; . ; . ; . ;
NC_000964.3	75461	A	G	225	hom	239	239	tilS	gene-BSU_00670	74929	76347	+	missense_variant ; tilS ; c.533A>G ; p.His178Arg ; 533/1419 ; 533/1419 ; 178/472 ;	missense_variant ; tilS ; c.533A>G ; p.His178Arg ; 533/1419 ; 533/1419 ; 178/472 ;	upstream_gene_variant ; hprT ; c.-883A>G ; . ; . ; . ; . ;	upstream_gene_variant ; ftsH ; c.-1523A>G ; . ; . ; . ; . ;	upstream_gene_variant ; coaX ; c.-3631A>G ; . ; . ; . ; . ;	upstream_gene_variant ; hslO ; c.-4419A>G ; . ; . ; . ; . ;
NC_000964.3	75835	G	A	225	hom	103	103	tilS	gene-BSU_00670	74929	76347	+	missense_variant ; tilS ; c.907G>A ; p.Gly303Ser ; 907/1419 ; 907/1419 ; 303/472 ;	missense_variant ; tilS ; c.907G>A ; p.Gly303Ser ; 907/1419 ; 907/1419 ; 303/472 ;	upstream_gene_variant ; hprT ; c.-509G>A ; . ; . ; . ; . ;	upstream_gene_variant ; ftsH ; c.-1149G>A ; . ; . ; . ; . ;	upstream_gene_variant ; coaX ; c.-3257G>A ; . ; . ; . ; . ;	upstream_gene_variant ; hslO ; c.-4045G>A ; . ; . ; . ; . ;
NC_000964.3	75867	G	A	225	hom	114	114	tilS	gene-BSU_00670	74929	76347	+	synonymous_variant ; tilS ; c.939G>A ; p.Gly313Gly ; 939/1419 ; 939/1419 ; 313/472 ;	synonymous_variant ; tilS ; c.939G>A ; p.Gly313Gly ; 939/1419 ; 939/1419 ; 313/472 ;	upstream_gene_variant ; hprT ; c.-477G>A ; . ; . ; . ; . ;	upstream_gene_variant ; ftsH ; c.-1117G>A ; . ; . ; . ; . ;	upstream_gene_variant ; coaX ; c.-3225G>A ; . ; . ; . ; . ;	upstream_gene_variant ; hslO ; c.-4013G>A ; . ; . ; . ; . ;
NC_000964.3	75978	G	A	225	hom	173	173	tilS	gene-BSU_00670	74929	76347	+	synonymous_variant ; tilS ; c.1050G>A ; p.Val350Val ; 1050/1419 ; 1050/1419 ; 350/472 ;	synonymous_variant ; tilS ; c.1050G>A ; p.Val350Val ; 1050/1419 ; 1050/1419 ; 350/472 ;	upstream_gene_variant ; hprT ; c.-366G>A ; . ; . ; . ; . ;	upstream_gene_variant ; ftsH ; c.-1006G>A ; . ; . ; . ; . ;	upstream_gene_variant ; coaX ; c.-3114G>A ; . ; . ; . ; . ;	upstream_gene_variant ; hslO ; c.-3902G>A ; . ; . ; . ; . ;
NC_000964.3	76007	G	A	228	hom	179	178	tilS	gene-BSU_00670	74929	76347	+	missense_variant ; tilS ; c.1079G>A ; p.Arg360Lys ; 1079/1419 ; 1079/1419 ; 360/472 ;	missense_variant ; tilS ; c.1079G>A ; p.Arg360Lys ; 1079/1419 ; 1079/1419 ; 360/472 ;	upstream_gene_variant ; hprT ; c.-337G>A ; . ; . ; . ; . ;	upstream_gene_variant ; ftsH ; c.-977G>A ; . ; . ; . ; . ;	upstream_gene_variant ; coaX ; c.-3085G>A ; . ; . ; . ; . ;	upstream_gene_variant ; hslO ; c.-3873G>A ; . ; . ; . ; . ;
NC_000964.3	76074	A	G	225	hom	193	193	tilS	gene-BSU_00670	74929	76347	+	synonymous_variant ; tilS ; c.1146A>G ; p.Arg382Arg ; 1146/1419 ; 1146/1419 ; 382/472 ;	synonymous_variant ; tilS ; c.1146A>G ; p.Arg382Arg ; 1146/1419 ; 1146/1419 ; 382/472 ;	upstream_gene_variant ; hprT ; c.-270A>G ; . ; . ; . ; . ;	upstream_gene_variant ; ftsH ; c.-910A>G ; . ; . ; . ; . ;	upstream_gene_variant ; coaX ; c.-3018A>G ; . ; . ; . ; . ;	upstream_gene_variant ; hslO ; c.-3806A>G ; . ; . ; . ; . ;
NC_000964.3	76174	T	C	225	hom	286	286	tilS	gene-BSU_00670	74929	76347	+	synonymous_variant ; tilS ; c.1246T>C ; p.Leu416Leu ; 1246/1419 ; 1246/1419 ; 416/472 ;	synonymous_variant ; tilS ; c.1246T>C ; p.Leu416Leu ; 1246/1419 ; 1246/1419 ; 416/472 ;	upstream_gene_variant ; hprT ; c.-170T>C ; . ; . ; . ; . ;	upstream_gene_variant ; ftsH ; c.-810T>C ; . ; . ; . ; . ;	upstream_gene_variant ; coaX ; c.-2918T>C ; . ; . ; . ; . ;	upstream_gene_variant ; hslO ; c.-3706T>C ; . ; . ; . ; . ;
NC_000964.3	76408	A	G	225	hom	233	233	hprT	gene-BSU_00680	76344	76886	+	missense_variant ; hprT ; c.65A>G ; p.Glu22Gly ; 65/543 ; 65/543 ; 22/180 ;	missense_variant ; hprT ; c.65A>G ; p.Glu22Gly ; 65/543 ; 65/543 ; 22/180 ;	upstream_gene_variant ; ftsH ; c.-576A>G ; . ; . ; . ; . ;	upstream_gene_variant ; coaX ; c.-2684A>G ; . ; . ; . ; . ;	upstream_gene_variant ; hslO ; c.-3472A>G ; . ; . ; . ; . ;	upstream_gene_variant ; yacD ; c.-4394A>G ; . ; . ; . ; . ;
NC_000964.3	76502	C	A	225	hom	157	157	hprT	gene-BSU_00680	76344	76886	+	synonymous_variant ; hprT ; c.159C>A ; p.Ile53Ile ; 159/543 ; 159/543 ; 53/180 ;	synonymous_variant ; hprT ; c.159C>A ; p.Ile53Ile ; 159/543 ; 159/543 ; 53/180 ;	upstream_gene_variant ; ftsH ; c.-482C>A ; . ; . ; . ; . ;	upstream_gene_variant ; coaX ; c.-2590C>A ; . ; . ; . ; . ;	upstream_gene_variant ; hslO ; c.-3378C>A ; . ; . ; . ; . ;	upstream_gene_variant ; yacD ; c.-4300C>A ; . ; . ; . ; . ;
NC_000964.3	77787	G	A	225	hom	226	226	ftsH	gene-BSU_00690	76984	78897	+	synonymous_variant ; ftsH ; c.804G>A ; p.Gln268Gln ; 804/1914 ; 804/1914 ; 268/637 ;	synonymous_variant ; ftsH ; c.804G>A ; p.Gln268Gln ; 804/1914 ; 804/1914 ; 268/637 ;	upstream_gene_variant ; coaX ; c.-1305G>A ; . ; . ; . ; . ;	upstream_gene_variant ; hslO ; c.-2093G>A ; . ; . ; . ; . ;	upstream_gene_variant ; yacD ; c.-3015G>A ; . ; . ; . ; . ;	upstream_gene_variant ; cysK ; c.-3984G>A ; . ; . ; . ; . ;
NC_000964.3	77961	C	T	225	hom	297	297	ftsH	gene-BSU_00690	76984	78897	+	synonymous_variant ; ftsH ; c.978C>T ; p.Ile326Ile ; 978/1914 ; 978/1914 ; 326/637 ;	synonymous_variant ; ftsH ; c.978C>T ; p.Ile326Ile ; 978/1914 ; 978/1914 ; 326/637 ;	upstream_gene_variant ; coaX ; c.-1131C>T ; . ; . ; . ; . ;	upstream_gene_variant ; hslO ; c.-1919C>T ; . ; . ; . ; . ;	upstream_gene_variant ; yacD ; c.-2841C>T ; . ; . ; . ; . ;	upstream_gene_variant ; cysK ; c.-3810C>T ; . ; . ; . ; . ;
NC_000964.3	77973	C	T	228	hom	296	295	ftsH	gene-BSU_00690	76984	78897	+	synonymous_variant ; ftsH ; c.990C>T ; p.Arg330Arg ; 990/1914 ; 990/1914 ; 330/637 ;	synonymous_variant ; ftsH ; c.990C>T ; p.Arg330Arg ; 990/1914 ; 990/1914 ; 330/637 ;	upstream_gene_variant ; coaX ; c.-1119C>T ; . ; . ; . ; . ;	upstream_gene_variant ; hslO ; c.-1907C>T ; . ; . ; . ; . ;	upstream_gene_variant ; yacD ; c.-2829C>T ; . ; . ; . ; . ;	upstream_gene_variant ; cysK ; c.-3798C>T ; . ; . ; . ; . ;
NC_000964.3	78081	A	G	228	hom	302	301	ftsH	gene-BSU_00690	76984	78897	+	synonymous_variant ; ftsH ; c.1098A>G ; p.Ser366Ser ; 1098/1914 ; 1098/1914 ; 366/637 ;	synonymous_variant ; ftsH ; c.1098A>G ; p.Ser366Ser ; 1098/1914 ; 1098/1914 ; 366/637 ;	upstream_gene_variant ; coaX ; c.-1011A>G ; . ; . ; . ; . ;	upstream_gene_variant ; hslO ; c.-1799A>G ; . ; . ; . ; . ;	upstream_gene_variant ; yacD ; c.-2721A>G ; . ; . ; . ; . ;	upstream_gene_variant ; cysK ; c.-3690A>G ; . ; . ; . ; . ;
NC_000964.3	78519	A	G	225	hom	282	282	ftsH	gene-BSU_00690	76984	78897	+	synonymous_variant ; ftsH ; c.1536A>G ; p.Thr512Thr ; 1536/1914 ; 1536/1914 ; 512/637 ;	synonymous_variant ; ftsH ; c.1536A>G ; p.Thr512Thr ; 1536/1914 ; 1536/1914 ; 512/637 ;	upstream_gene_variant ; coaX ; c.-573A>G ; . ; . ; . ; . ;	upstream_gene_variant ; hslO ; c.-1361A>G ; . ; . ; . ; . ;	upstream_gene_variant ; yacD ; c.-2283A>G ; . ; . ; . ; . ;	upstream_gene_variant ; cysK ; c.-3252A>G ; . ; . ; . ; . ;
NC_000964.3	78957	T	G	225	hom	116	116	.	.	.	.	.	.	upstream_gene_variant ; coaX ; c.-135T>G ; . ; . ; . ; . ;	upstream_gene_variant ; hslO ; c.-923T>G ; . ; . ; . ; . ;	upstream_gene_variant ; yacD ; c.-1845T>G ; . ; . ; . ; . ;	upstream_gene_variant ; cysK ; c.-2814T>G ; . ; . ; . ; . ;	upstream_gene_variant ; pabB ; c.-3907T>G ; . ; . ; . ; . ;
NC_000964.3	78958	G	T	225	hom	116	116	.	.	.	.	.	.	upstream_gene_variant ; coaX ; c.-134G>T ; . ; . ; . ; . ;	upstream_gene_variant ; hslO ; c.-922G>T ; . ; . ; . ; . ;	upstream_gene_variant ; yacD ; c.-1844G>T ; . ; . ; . ; . ;	upstream_gene_variant ; cysK ; c.-2813G>T ; . ; . ; . ; . ;	upstream_gene_variant ; pabB ; c.-3906G>T ; . ; . ; . ; . ;
NC_000964.3	78965	C	G	225	hom	126	126	.	.	.	.	.	.	upstream_gene_variant ; coaX ; c.-127C>G ; . ; . ; . ; . ;	upstream_gene_variant ; hslO ; c.-915C>G ; . ; . ; . ; . ;	upstream_gene_variant ; yacD ; c.-1837C>G ; . ; . ; . ; . ;	upstream_gene_variant ; cysK ; c.-2806C>G ; . ; . ; . ; . ;	upstream_gene_variant ; pabB ; c.-3899C>G ; . ; . ; . ; . ;
NC_000964.3	79346	T	G	225	hom	199	199	coaX	gene-BSU_00700	79092	79868	+	synonymous_variant ; coaX ; c.255T>G ; p.Pro85Pro ; 255/777 ; 255/777 ; 85/258 ;	synonymous_variant ; coaX ; c.255T>G ; p.Pro85Pro ; 255/777 ; 255/777 ; 85/258 ;	upstream_gene_variant ; hslO ; c.-534T>G ; . ; . ; . ; . ;	upstream_gene_variant ; yacD ; c.-1456T>G ; . ; . ; . ; . ;	upstream_gene_variant ; cysK ; c.-2425T>G ; . ; . ; . ; . ;	upstream_gene_variant ; pabB ; c.-3518T>G ; . ; . ; . ; . ;
NC_000964.3	79394	C	T	225	hom	226	226	coaX	gene-BSU_00700	79092	79868	+	synonymous_variant ; coaX ; c.303C>T ; p.Asp101Asp ; 303/777 ; 303/777 ; 101/258 ;	synonymous_variant ; coaX ; c.303C>T ; p.Asp101Asp ; 303/777 ; 303/777 ; 101/258 ;	upstream_gene_variant ; hslO ; c.-486C>T ; . ; . ; . ; . ;	upstream_gene_variant ; yacD ; c.-1408C>T ; . ; . ; . ; . ;	upstream_gene_variant ; cysK ; c.-2377C>T ; . ; . ; . ; . ;	upstream_gene_variant ; pabB ; c.-3470C>T ; . ; . ; . ; . ;
NC_000964.3	79409	A	G	225	hom	236	236	coaX	gene-BSU_00700	79092	79868	+	synonymous_variant ; coaX ; c.318A>G ; p.Val106Val ; 318/777 ; 318/777 ; 106/258 ;	synonymous_variant ; coaX ; c.318A>G ; p.Val106Val ; 318/777 ; 318/777 ; 106/258 ;	upstream_gene_variant ; hslO ; c.-471A>G ; . ; . ; . ; . ;	upstream_gene_variant ; yacD ; c.-1393A>G ; . ; . ; . ; . ;	upstream_gene_variant ; cysK ; c.-2362A>G ; . ; . ; . ; . ;	upstream_gene_variant ; pabB ; c.-3455A>G ; . ; . ; . ; . ;
NC_000964.3	79598	T	G	225	hom	270	270	coaX	gene-BSU_00700	79092	79868	+	synonymous_variant ; coaX ; c.507T>G ; p.Pro169Pro ; 507/777 ; 507/777 ; 169/258 ;	synonymous_variant ; coaX ; c.507T>G ; p.Pro169Pro ; 507/777 ; 507/777 ; 169/258 ;	upstream_gene_variant ; hslO ; c.-282T>G ; . ; . ; . ; . ;	upstream_gene_variant ; yacD ; c.-1204T>G ; . ; . ; . ; . ;	upstream_gene_variant ; cysK ; c.-2173T>G ; . ; . ; . ; . ;	upstream_gene_variant ; pabB ; c.-3266T>G ; . ; . ; . ; . ;
NC_000964.3	79664	A	G	225	hom	248	248	coaX	gene-BSU_00700	79092	79868	+	synonymous_variant ; coaX ; c.573A>G ; p.Gly191Gly ; 573/777 ; 573/777 ; 191/258 ;	synonymous_variant ; coaX ; c.573A>G ; p.Gly191Gly ; 573/777 ; 573/777 ; 191/258 ;	upstream_gene_variant ; hslO ; c.-216A>G ; . ; . ; . ; . ;	upstream_gene_variant ; yacD ; c.-1138A>G ; . ; . ; . ; . ;	upstream_gene_variant ; cysK ; c.-2107A>G ; . ; . ; . ; . ;	upstream_gene_variant ; pabB ; c.-3200A>G ; . ; . ; . ; . ;
NC_000964.3	79769	C	T	225	hom	292	292	coaX	gene-BSU_00700	79092	79868	+	synonymous_variant ; coaX ; c.678C>T ; p.Leu226Leu ; 678/777 ; 678/777 ; 226/258 ;	synonymous_variant ; coaX ; c.678C>T ; p.Leu226Leu ; 678/777 ; 678/777 ; 226/258 ;	upstream_gene_variant ; hslO ; c.-111C>T ; . ; . ; . ; . ;	upstream_gene_variant ; yacD ; c.-1033C>T ; . ; . ; . ; . ;	upstream_gene_variant ; cysK ; c.-2002C>T ; . ; . ; . ; . ;	upstream_gene_variant ; pabB ; c.-3095C>T ; . ; . ; . ; . ;
NC_000964.3	79993	A	G	225	hom	449	449	hslO	gene-BSU_00710	79880	80755	+	synonymous_variant ; hslO ; c.114A>G ; p.Ala38Ala ; 114/876 ; 114/876 ; 38/291 ;	synonymous_variant ; hslO ; c.114A>G ; p.Ala38Ala ; 114/876 ; 114/876 ; 38/291 ;	upstream_gene_variant ; yacD ; c.-809A>G ; . ; . ; . ; . ;	upstream_gene_variant ; cysK ; c.-1778A>G ; . ; . ; . ; . ;	upstream_gene_variant ; pabB ; c.-2871A>G ; . ; . ; . ; . ;	upstream_gene_variant ; pabA ; c.-4297A>G ; . ; . ; . ; . ;
NC_000964.3	80003	C	T	228	hom	432	431	hslO	gene-BSU_00710	79880	80755	+	synonymous_variant ; hslO ; c.124C>T ; p.Leu42Leu ; 124/876 ; 124/876 ; 42/291 ;	synonymous_variant ; hslO ; c.124C>T ; p.Leu42Leu ; 124/876 ; 124/876 ; 42/291 ;	upstream_gene_variant ; yacD ; c.-799C>T ; . ; . ; . ; . ;	upstream_gene_variant ; cysK ; c.-1768C>T ; . ; . ; . ; . ;	upstream_gene_variant ; pabB ; c.-2861C>T ; . ; . ; . ; . ;	upstream_gene_variant ; pabA ; c.-4287C>T ; . ; . ; . ; . ;
NC_000964.3	80005	A	G	225	hom	428	428	hslO	gene-BSU_00710	79880	80755	+	synonymous_variant ; hslO ; c.126A>G ; p.Leu42Leu ; 126/876 ; 126/876 ; 42/291 ;	synonymous_variant ; hslO ; c.126A>G ; p.Leu42Leu ; 126/876 ; 126/876 ; 42/291 ;	upstream_gene_variant ; yacD ; c.-797A>G ; . ; . ; . ; . ;	upstream_gene_variant ; cysK ; c.-1766A>G ; . ; . ; . ; . ;	upstream_gene_variant ; pabB ; c.-2859A>G ; . ; . ; . ; . ;	upstream_gene_variant ; pabA ; c.-4285A>G ; . ; . ; . ; . ;
NC_000964.3	80011	T	C	225	hom	434	434	hslO	gene-BSU_00710	79880	80755	+	synonymous_variant ; hslO ; c.132T>C ; p.Arg44Arg ; 132/876 ; 132/876 ; 44/291 ;	synonymous_variant ; hslO ; c.132T>C ; p.Arg44Arg ; 132/876 ; 132/876 ; 44/291 ;	upstream_gene_variant ; yacD ; c.-791T>C ; . ; . ; . ; . ;	upstream_gene_variant ; cysK ; c.-1760T>C ; . ; . ; . ; . ;	upstream_gene_variant ; pabB ; c.-2853T>C ; . ; . ; . ; . ;	upstream_gene_variant ; pabA ; c.-4279T>C ; . ; . ; . ; . ;
NC_000964.3	80122	C	G	225	hom	358	358	hslO	gene-BSU_00710	79880	80755	+	synonymous_variant ; hslO ; c.243C>G ; p.Ala81Ala ; 243/876 ; 243/876 ; 81/291 ;	synonymous_variant ; hslO ; c.243C>G ; p.Ala81Ala ; 243/876 ; 243/876 ; 81/291 ;	upstream_gene_variant ; yacD ; c.-680C>G ; . ; . ; . ; . ;	upstream_gene_variant ; cysK ; c.-1649C>G ; . ; . ; . ; . ;	upstream_gene_variant ; pabB ; c.-2742C>G ; . ; . ; . ; . ;	upstream_gene_variant ; pabA ; c.-4168C>G ; . ; . ; . ; . ;
NC_000964.3	80131	A	G	225	hom	348	348	hslO	gene-BSU_00710	79880	80755	+	synonymous_variant ; hslO ; c.252A>G ; p.Glu84Glu ; 252/876 ; 252/876 ; 84/291 ;	synonymous_variant ; hslO ; c.252A>G ; p.Glu84Glu ; 252/876 ; 252/876 ; 84/291 ;	upstream_gene_variant ; yacD ; c.-671A>G ; . ; . ; . ; . ;	upstream_gene_variant ; cysK ; c.-1640A>G ; . ; . ; . ; . ;	upstream_gene_variant ; pabB ; c.-2733A>G ; . ; . ; . ; . ;	upstream_gene_variant ; pabA ; c.-4159A>G ; . ; . ; . ; . ;
NC_000964.3	80185	T	C	225	hom	258	258	hslO	gene-BSU_00710	79880	80755	+	synonymous_variant ; hslO ; c.306T>C ; p.Gly102Gly ; 306/876 ; 306/876 ; 102/291 ;	synonymous_variant ; hslO ; c.306T>C ; p.Gly102Gly ; 306/876 ; 306/876 ; 102/291 ;	upstream_gene_variant ; yacD ; c.-617T>C ; . ; . ; . ; . ;	upstream_gene_variant ; cysK ; c.-1586T>C ; . ; . ; . ; . ;	upstream_gene_variant ; pabB ; c.-2679T>C ; . ; . ; . ; . ;	upstream_gene_variant ; pabA ; c.-4105T>C ; . ; . ; . ; . ;
NC_000964.3	80251	G	A	225	hom	182	182	hslO	gene-BSU_00710	79880	80755	+	synonymous_variant ; hslO ; c.372G>A ; p.Leu124Leu ; 372/876 ; 372/876 ; 124/291 ;	synonymous_variant ; hslO ; c.372G>A ; p.Leu124Leu ; 372/876 ; 372/876 ; 124/291 ;	upstream_gene_variant ; yacD ; c.-551G>A ; . ; . ; . ; . ;	upstream_gene_variant ; cysK ; c.-1520G>A ; . ; . ; . ; . ;	upstream_gene_variant ; pabB ; c.-2613G>A ; . ; . ; . ; . ;	upstream_gene_variant ; pabA ; c.-4039G>A ; . ; . ; . ; . ;
NC_000964.3	80299	A	C	225	hom	165	165	hslO	gene-BSU_00710	79880	80755	+	synonymous_variant ; hslO ; c.420A>C ; p.Gly140Gly ; 420/876 ; 420/876 ; 140/291 ;	synonymous_variant ; hslO ; c.420A>C ; p.Gly140Gly ; 420/876 ; 420/876 ; 140/291 ;	upstream_gene_variant ; yacD ; c.-503A>C ; . ; . ; . ; . ;	upstream_gene_variant ; cysK ; c.-1472A>C ; . ; . ; . ; . ;	upstream_gene_variant ; pabB ; c.-2565A>C ; . ; . ; . ; . ;	upstream_gene_variant ; pabA ; c.-3991A>C ; . ; . ; . ; . ;
NC_000964.3	80308	T	C	225	hom	162	162	hslO	gene-BSU_00710	79880	80755	+	synonymous_variant ; hslO ; c.429T>C ; p.Phe143Phe ; 429/876 ; 429/876 ; 143/291 ;	synonymous_variant ; hslO ; c.429T>C ; p.Phe143Phe ; 429/876 ; 429/876 ; 143/291 ;	upstream_gene_variant ; yacD ; c.-494T>C ; . ; . ; . ; . ;	upstream_gene_variant ; cysK ; c.-1463T>C ; . ; . ; . ; . ;	upstream_gene_variant ; pabB ; c.-2556T>C ; . ; . ; . ; . ;	upstream_gene_variant ; pabA ; c.-3982T>C ; . ; . ; . ; . ;
NC_000964.3	80368	A	G	225	hom	152	152	hslO	gene-BSU_00710	79880	80755	+	synonymous_variant ; hslO ; c.489A>G ; p.Val163Val ; 489/876 ; 489/876 ; 163/291 ;	synonymous_variant ; hslO ; c.489A>G ; p.Val163Val ; 489/876 ; 489/876 ; 163/291 ;	upstream_gene_variant ; yacD ; c.-434A>G ; . ; . ; . ; . ;	upstream_gene_variant ; cysK ; c.-1403A>G ; . ; . ; . ; . ;	upstream_gene_variant ; pabB ; c.-2496A>G ; . ; . ; . ; . ;	upstream_gene_variant ; pabA ; c.-3922A>G ; . ; . ; . ; . ;
NC_000964.3	80930	A	G	225	hom	239	239	yacD	gene-BSU_00720	80802	81695	+	synonymous_variant ; yacD ; c.129A>G ; p.Gly43Gly ; 129/894 ; 129/894 ; 43/297 ;	synonymous_variant ; yacD ; c.129A>G ; p.Gly43Gly ; 129/894 ; 129/894 ; 43/297 ;	upstream_gene_variant ; cysK ; c.-841A>G ; . ; . ; . ; . ;	upstream_gene_variant ; pabB ; c.-1934A>G ; . ; . ; . ; . ;	upstream_gene_variant ; pabA ; c.-3360A>G ; . ; . ; . ; . ;	upstream_gene_variant ; pabC ; c.-3944A>G ; . ; . ; . ; . ;
NC_000964.3	80992	C	T	225	hom	253	253	yacD	gene-BSU_00720	80802	81695	+	missense_variant ; yacD ; c.191C>T ; p.Thr64Met ; 191/894 ; 191/894 ; 64/297 ;	missense_variant ; yacD ; c.191C>T ; p.Thr64Met ; 191/894 ; 191/894 ; 64/297 ;	upstream_gene_variant ; cysK ; c.-779C>T ; . ; . ; . ; . ;	upstream_gene_variant ; pabB ; c.-1872C>T ; . ; . ; . ; . ;	upstream_gene_variant ; pabA ; c.-3298C>T ; . ; . ; . ; . ;	upstream_gene_variant ; pabC ; c.-3882C>T ; . ; . ; . ; . ;
NC_000964.3	81041	G	A	225	hom	232	232	yacD	gene-BSU_00720	80802	81695	+	synonymous_variant ; yacD ; c.240G>A ; p.Lys80Lys ; 240/894 ; 240/894 ; 80/297 ;	synonymous_variant ; yacD ; c.240G>A ; p.Lys80Lys ; 240/894 ; 240/894 ; 80/297 ;	upstream_gene_variant ; cysK ; c.-730G>A ; . ; . ; . ; . ;	upstream_gene_variant ; pabB ; c.-1823G>A ; . ; . ; . ; . ;	upstream_gene_variant ; pabA ; c.-3249G>A ; . ; . ; . ; . ;	upstream_gene_variant ; pabC ; c.-3833G>A ; . ; . ; . ; . ;
NC_000964.3	81047	A	C	228	hom	239	238	yacD	gene-BSU_00720	80802	81695	+	missense_variant ; yacD ; c.246A>C ; p.Lys82Asn ; 246/894 ; 246/894 ; 82/297 ;	missense_variant ; yacD ; c.246A>C ; p.Lys82Asn ; 246/894 ; 246/894 ; 82/297 ;	upstream_gene_variant ; cysK ; c.-724A>C ; . ; . ; . ; . ;	upstream_gene_variant ; pabB ; c.-1817A>C ; . ; . ; . ; . ;	upstream_gene_variant ; pabA ; c.-3243A>C ; . ; . ; . ; . ;	upstream_gene_variant ; pabC ; c.-3827A>C ; . ; . ; . ; . ;
NC_000964.3	81182	T	A	225	hom	259	259	yacD	gene-BSU_00720	80802	81695	+	missense_variant ; yacD ; c.381T>A ; p.Asp127Glu ; 381/894 ; 381/894 ; 127/297 ;	missense_variant ; yacD ; c.381T>A ; p.Asp127Glu ; 381/894 ; 381/894 ; 127/297 ;	upstream_gene_variant ; cysK ; c.-589T>A ; . ; . ; . ; . ;	upstream_gene_variant ; pabB ; c.-1682T>A ; . ; . ; . ; . ;	upstream_gene_variant ; pabA ; c.-3108T>A ; . ; . ; . ; . ;	upstream_gene_variant ; pabC ; c.-3692T>A ; . ; . ; . ; . ;
NC_000964.3	81222	G	A	225	hom	281	281	yacD	gene-BSU_00720	80802	81695	+	missense_variant ; yacD ; c.421G>A ; p.Glu141Lys ; 421/894 ; 421/894 ; 141/297 ;	missense_variant ; yacD ; c.421G>A ; p.Glu141Lys ; 421/894 ; 421/894 ; 141/297 ;	upstream_gene_variant ; cysK ; c.-549G>A ; . ; . ; . ; . ;	upstream_gene_variant ; pabB ; c.-1642G>A ; . ; . ; . ; . ;	upstream_gene_variant ; pabA ; c.-3068G>A ; . ; . ; . ; . ;	upstream_gene_variant ; pabC ; c.-3652G>A ; . ; . ; . ; . ;
NC_000964.3	81311	A	G	225	hom	310	310	yacD	gene-BSU_00720	80802	81695	+	synonymous_variant ; yacD ; c.510A>G ; p.Ala170Ala ; 510/894 ; 510/894 ; 170/297 ;	synonymous_variant ; yacD ; c.510A>G ; p.Ala170Ala ; 510/894 ; 510/894 ; 170/297 ;	upstream_gene_variant ; cysK ; c.-460A>G ; . ; . ; . ; . ;	upstream_gene_variant ; pabB ; c.-1553A>G ; . ; . ; . ; . ;	upstream_gene_variant ; pabA ; c.-2979A>G ; . ; . ; . ; . ;	upstream_gene_variant ; pabC ; c.-3563A>G ; . ; . ; . ; . ;
NC_000964.3	81365	C	T	228	hom	344	343	yacD	gene-BSU_00720	80802	81695	+	synonymous_variant ; yacD ; c.564C>T ; p.Ala188Ala ; 564/894 ; 564/894 ; 188/297 ;	synonymous_variant ; yacD ; c.564C>T ; p.Ala188Ala ; 564/894 ; 564/894 ; 188/297 ;	upstream_gene_variant ; cysK ; c.-406C>T ; . ; . ; . ; . ;	upstream_gene_variant ; pabB ; c.-1499C>T ; . ; . ; . ; . ;	upstream_gene_variant ; pabA ; c.-2925C>T ; . ; . ; . ; . ;	upstream_gene_variant ; pabC ; c.-3509C>T ; . ; . ; . ; . ;
NC_000964.3	81374	T	C	225	hom	333	333	yacD	gene-BSU_00720	80802	81695	+	synonymous_variant ; yacD ; c.573T>C ; p.Ser191Ser ; 573/894 ; 573/894 ; 191/297 ;	synonymous_variant ; yacD ; c.573T>C ; p.Ser191Ser ; 573/894 ; 573/894 ; 191/297 ;	upstream_gene_variant ; cysK ; c.-397T>C ; . ; . ; . ; . ;	upstream_gene_variant ; pabB ; c.-1490T>C ; . ; . ; . ; . ;	upstream_gene_variant ; pabA ; c.-2916T>C ; . ; . ; . ; . ;	upstream_gene_variant ; pabC ; c.-3500T>C ; . ; . ; . ; . ;
NC_000964.3	81377	A	T	228	hom	334	333	yacD	gene-BSU_00720	80802	81695	+	synonymous_variant ; yacD ; c.576A>T ; p.Thr192Thr ; 576/894 ; 576/894 ; 192/297 ;	synonymous_variant ; yacD ; c.576A>T ; p.Thr192Thr ; 576/894 ; 576/894 ; 192/297 ;	upstream_gene_variant ; cysK ; c.-394A>T ; . ; . ; . ; . ;	upstream_gene_variant ; pabB ; c.-1487A>T ; . ; . ; . ; . ;	upstream_gene_variant ; pabA ; c.-2913A>T ; . ; . ; . ; . ;	upstream_gene_variant ; pabC ; c.-3497A>T ; . ; . ; . ; . ;
NC_000964.3	81471	C	A	225	hom	349	349	yacD	gene-BSU_00720	80802	81695	+	missense_variant ; yacD ; c.670C>A ; p.Leu224Ile ; 670/894 ; 670/894 ; 224/297 ;	missense_variant ; yacD ; c.670C>A ; p.Leu224Ile ; 670/894 ; 670/894 ; 224/297 ;	upstream_gene_variant ; cysK ; c.-300C>A ; . ; . ; . ; . ;	upstream_gene_variant ; pabB ; c.-1393C>A ; . ; . ; . ; . ;	upstream_gene_variant ; pabA ; c.-2819C>A ; . ; . ; . ; . ;	upstream_gene_variant ; pabC ; c.-3403C>A ; . ; . ; . ; . ;
NC_000964.3	81815	G	A	225	hom	429	429	cysK	gene-BSU_00730	81771	82697	+	synonymous_variant ; cysK ; c.45G>A ; p.Thr15Thr ; 45/927 ; 45/927 ; 15/308 ;	synonymous_variant ; cysK ; c.45G>A ; p.Thr15Thr ; 45/927 ; 45/927 ; 15/308 ;	upstream_gene_variant ; pabB ; c.-1049G>A ; . ; . ; . ; . ;	upstream_gene_variant ; pabA ; c.-2475G>A ; . ; . ; . ; . ;	upstream_gene_variant ; pabC ; c.-3059G>A ; . ; . ; . ; . ;	upstream_gene_variant ; folP ; c.-3922G>A ; . ; . ; . ; . ;
NC_000964.3	81923	T	C	225	hom	402	402	cysK	gene-BSU_00730	81771	82697	+	synonymous_variant ; cysK ; c.153T>C ; p.Ala51Ala ; 153/927 ; 153/927 ; 51/308 ;	synonymous_variant ; cysK ; c.153T>C ; p.Ala51Ala ; 153/927 ; 153/927 ; 51/308 ;	upstream_gene_variant ; pabB ; c.-941T>C ; . ; . ; . ; . ;	upstream_gene_variant ; pabA ; c.-2367T>C ; . ; . ; . ; . ;	upstream_gene_variant ; pabC ; c.-2951T>C ; . ; . ; . ; . ;	upstream_gene_variant ; folP ; c.-3814T>C ; . ; . ; . ; . ;
NC_000964.3	81966	A	G	225	hom	398	398	cysK	gene-BSU_00730	81771	82697	+	missense_variant ; cysK ; c.196A>G ; p.Asn66Asp ; 196/927 ; 196/927 ; 66/308 ;	missense_variant ; cysK ; c.196A>G ; p.Asn66Asp ; 196/927 ; 196/927 ; 66/308 ;	upstream_gene_variant ; pabB ; c.-898A>G ; . ; . ; . ; . ;	upstream_gene_variant ; pabA ; c.-2324A>G ; . ; . ; . ; . ;	upstream_gene_variant ; pabC ; c.-2908A>G ; . ; . ; . ; . ;	upstream_gene_variant ; folP ; c.-3771A>G ; . ; . ; . ; . ;
NC_000964.3	82043	C	T	225	hom	337	337	cysK	gene-BSU_00730	81771	82697	+	synonymous_variant ; cysK ; c.273C>T ; p.Ala91Ala ; 273/927 ; 273/927 ; 91/308 ;	synonymous_variant ; cysK ; c.273C>T ; p.Ala91Ala ; 273/927 ; 273/927 ; 91/308 ;	upstream_gene_variant ; pabB ; c.-821C>T ; . ; . ; . ; . ;	upstream_gene_variant ; pabA ; c.-2247C>T ; . ; . ; . ; . ;	upstream_gene_variant ; pabC ; c.-2831C>T ; . ; . ; . ; . ;	upstream_gene_variant ; folP ; c.-3694C>T ; . ; . ; . ; . ;
NC_000964.3	82100	T	C	225	hom	304	304	cysK	gene-BSU_00730	81771	82697	+	synonymous_variant ; cysK ; c.330T>C ; p.Tyr110Tyr ; 330/927 ; 330/927 ; 110/308 ;	synonymous_variant ; cysK ; c.330T>C ; p.Tyr110Tyr ; 330/927 ; 330/927 ; 110/308 ;	upstream_gene_variant ; pabB ; c.-764T>C ; . ; . ; . ; . ;	upstream_gene_variant ; pabA ; c.-2190T>C ; . ; . ; . ; . ;	upstream_gene_variant ; pabC ; c.-2774T>C ; . ; . ; . ; . ;	upstream_gene_variant ; folP ; c.-3637T>C ; . ; . ; . ; . ;
NC_000964.3	82148	T	C	225	hom	279	279	cysK	gene-BSU_00730	81771	82697	+	synonymous_variant ; cysK ; c.378T>C ; p.Ala126Ala ; 378/927 ; 378/927 ; 126/308 ;	synonymous_variant ; cysK ; c.378T>C ; p.Ala126Ala ; 378/927 ; 378/927 ; 126/308 ;	upstream_gene_variant ; pabB ; c.-716T>C ; . ; . ; . ; . ;	upstream_gene_variant ; pabA ; c.-2142T>C ; . ; . ; . ; . ;	upstream_gene_variant ; pabC ; c.-2726T>C ; . ; . ; . ; . ;	upstream_gene_variant ; folP ; c.-3589T>C ; . ; . ; . ; . ;
NC_000964.3	82223	C	A	225	hom	246	246	cysK	gene-BSU_00730	81771	82697	+	synonymous_variant ; cysK ; c.453C>A ; p.Pro151Pro ; 453/927 ; 453/927 ; 151/308 ;	synonymous_variant ; cysK ; c.453C>A ; p.Pro151Pro ; 453/927 ; 453/927 ; 151/308 ;	upstream_gene_variant ; pabB ; c.-641C>A ; . ; . ; . ; . ;	upstream_gene_variant ; pabA ; c.-2067C>A ; . ; . ; . ; . ;	upstream_gene_variant ; pabC ; c.-2651C>A ; . ; . ; . ; . ;	upstream_gene_variant ; folP ; c.-3514C>A ; . ; . ; . ; . ;
NC_000964.3	82277	T	C	225	hom	234	234	cysK	gene-BSU_00730	81771	82697	+	synonymous_variant ; cysK ; c.507T>C ; p.Asp169Asp ; 507/927 ; 507/927 ; 169/308 ;	synonymous_variant ; cysK ; c.507T>C ; p.Asp169Asp ; 507/927 ; 507/927 ; 169/308 ;	upstream_gene_variant ; pabB ; c.-587T>C ; . ; . ; . ; . ;	upstream_gene_variant ; pabA ; c.-2013T>C ; . ; . ; . ; . ;	upstream_gene_variant ; pabC ; c.-2597T>C ; . ; . ; . ; . ;	upstream_gene_variant ; folP ; c.-3460T>C ; . ; . ; . ; . ;
NC_000964.3	82334	C	T	225	hom	182	182	cysK	gene-BSU_00730	81771	82697	+	synonymous_variant ; cysK ; c.564C>T ; p.Gly188Gly ; 564/927 ; 564/927 ; 188/308 ;	synonymous_variant ; cysK ; c.564C>T ; p.Gly188Gly ; 564/927 ; 564/927 ; 188/308 ;	upstream_gene_variant ; pabB ; c.-530C>T ; . ; . ; . ; . ;	upstream_gene_variant ; pabA ; c.-1956C>T ; . ; . ; . ; . ;	upstream_gene_variant ; pabC ; c.-2540C>T ; . ; . ; . ; . ;	upstream_gene_variant ; folP ; c.-3403C>T ; . ; . ; . ; . ;
NC_000964.3	82373	T	C	225	hom	158	158	cysK	gene-BSU_00730	81771	82697	+	synonymous_variant ; cysK ; c.603T>C ; p.Tyr201Tyr ; 603/927 ; 603/927 ; 201/308 ;	synonymous_variant ; cysK ; c.603T>C ; p.Tyr201Tyr ; 603/927 ; 603/927 ; 201/308 ;	upstream_gene_variant ; pabB ; c.-491T>C ; . ; . ; . ; . ;	upstream_gene_variant ; pabA ; c.-1917T>C ; . ; . ; . ; . ;	upstream_gene_variant ; pabC ; c.-2501T>C ; . ; . ; . ; . ;	upstream_gene_variant ; folP ; c.-3364T>C ; . ; . ; . ; . ;
NC_000964.3	82448	A	T	225	hom	138	138	cysK	gene-BSU_00730	81771	82697	+	synonymous_variant ; cysK ; c.678A>T ; p.Ala226Ala ; 678/927 ; 678/927 ; 226/308 ;	synonymous_variant ; cysK ; c.678A>T ; p.Ala226Ala ; 678/927 ; 678/927 ; 226/308 ;	upstream_gene_variant ; pabB ; c.-416A>T ; . ; . ; . ; . ;	upstream_gene_variant ; pabA ; c.-1842A>T ; . ; . ; . ; . ;	upstream_gene_variant ; pabC ; c.-2426A>T ; . ; . ; . ; . ;	upstream_gene_variant ; folP ; c.-3289A>T ; . ; . ; . ; . ;
NC_000964.3	82496	C	T	225	hom	106	106	cysK	gene-BSU_00730	81771	82697	+	synonymous_variant ; cysK ; c.726C>T ; p.Phe242Phe ; 726/927 ; 726/927 ; 242/308 ;	synonymous_variant ; cysK ; c.726C>T ; p.Phe242Phe ; 726/927 ; 726/927 ; 242/308 ;	upstream_gene_variant ; pabB ; c.-368C>T ; . ; . ; . ; . ;	upstream_gene_variant ; pabA ; c.-1794C>T ; . ; . ; . ; . ;	upstream_gene_variant ; pabC ; c.-2378C>T ; . ; . ; . ; . ;	upstream_gene_variant ; folP ; c.-3241C>T ; . ; . ; . ; . ;
NC_000964.3	82685	C	T	225	hom	74	74	cysK	gene-BSU_00730	81771	82697	+	synonymous_variant ; cysK ; c.915C>T ; p.Tyr305Tyr ; 915/927 ; 915/927 ; 305/308 ;	synonymous_variant ; cysK ; c.915C>T ; p.Tyr305Tyr ; 915/927 ; 915/927 ; 305/308 ;	upstream_gene_variant ; pabB ; c.-179C>T ; . ; . ; . ; . ;	upstream_gene_variant ; pabA ; c.-1605C>T ; . ; . ; . ; . ;	upstream_gene_variant ; pabC ; c.-2189C>T ; . ; . ; . ; . ;	upstream_gene_variant ; folP ; c.-3052C>T ; . ; . ; . ; . ;
NC_000964.3	82718	T	C	225	hom	67	67	.	.	.	.	.	.	upstream_gene_variant ; pabB ; c.-146T>C ; . ; . ; . ; . ;	upstream_gene_variant ; pabA ; c.-1572T>C ; . ; . ; . ; . ;	upstream_gene_variant ; pabC ; c.-2156T>C ; . ; . ; . ; . ;	upstream_gene_variant ; folP ; c.-3019T>C ; . ; . ; . ; . ;	upstream_gene_variant ; folB ; c.-3869T>C ; . ; . ; . ; . ;
NC_000964.3	82894	A	G	225	hom	111	111	pabB	gene-BSU_00740	82864	84276	+	missense_variant ; pabB ; c.31A>G ; p.Ile11Val ; 31/1413 ; 31/1413 ; 11/470 ;	missense_variant ; pabB ; c.31A>G ; p.Ile11Val ; 31/1413 ; 31/1413 ; 11/470 ;	upstream_gene_variant ; pabA ; c.-1396A>G ; . ; . ; . ; . ;	upstream_gene_variant ; pabC ; c.-1980A>G ; . ; . ; . ; . ;	upstream_gene_variant ; folP ; c.-2843A>G ; . ; . ; . ; . ;	upstream_gene_variant ; folB ; c.-3693A>G ; . ; . ; . ; . ;
NC_000964.3	82950	G	A	225	hom	149	149	pabB	gene-BSU_00740	82864	84276	+	synonymous_variant ; pabB ; c.87G>A ; p.Arg29Arg ; 87/1413 ; 87/1413 ; 29/470 ;	synonymous_variant ; pabB ; c.87G>A ; p.Arg29Arg ; 87/1413 ; 87/1413 ; 29/470 ;	upstream_gene_variant ; pabA ; c.-1340G>A ; . ; . ; . ; . ;	upstream_gene_variant ; pabC ; c.-1924G>A ; . ; . ; . ; . ;	upstream_gene_variant ; folP ; c.-2787G>A ; . ; . ; . ; . ;	upstream_gene_variant ; folB ; c.-3637G>A ; . ; . ; . ; . ;
NC_000964.3	82992	T	C	225	hom	152	152	pabB	gene-BSU_00740	82864	84276	+	synonymous_variant ; pabB ; c.129T>C ; p.Tyr43Tyr ; 129/1413 ; 129/1413 ; 43/470 ;	synonymous_variant ; pabB ; c.129T>C ; p.Tyr43Tyr ; 129/1413 ; 129/1413 ; 43/470 ;	upstream_gene_variant ; pabA ; c.-1298T>C ; . ; . ; . ; . ;	upstream_gene_variant ; pabC ; c.-1882T>C ; . ; . ; . ; . ;	upstream_gene_variant ; folP ; c.-2745T>C ; . ; . ; . ; . ;	upstream_gene_variant ; folB ; c.-3595T>C ; . ; . ; . ; . ;
NC_000964.3	83121	A	G	225	hom	128	128	pabB	gene-BSU_00740	82864	84276	+	synonymous_variant ; pabB ; c.258A>G ; p.Thr86Thr ; 258/1413 ; 258/1413 ; 86/470 ;	synonymous_variant ; pabB ; c.258A>G ; p.Thr86Thr ; 258/1413 ; 258/1413 ; 86/470 ;	upstream_gene_variant ; pabA ; c.-1169A>G ; . ; . ; . ; . ;	upstream_gene_variant ; pabC ; c.-1753A>G ; . ; . ; . ; . ;	upstream_gene_variant ; folP ; c.-2616A>G ; . ; . ; . ; . ;	upstream_gene_variant ; folB ; c.-3466A>G ; . ; . ; . ; . ;
NC_000964.3	83236	T	C	225	hom	155	155	pabB	gene-BSU_00740	82864	84276	+	synonymous_variant ; pabB ; c.373T>C ; p.Leu125Leu ; 373/1413 ; 373/1413 ; 125/470 ;	synonymous_variant ; pabB ; c.373T>C ; p.Leu125Leu ; 373/1413 ; 373/1413 ; 125/470 ;	upstream_gene_variant ; pabA ; c.-1054T>C ; . ; . ; . ; . ;	upstream_gene_variant ; pabC ; c.-1638T>C ; . ; . ; . ; . ;	upstream_gene_variant ; folP ; c.-2501T>C ; . ; . ; . ; . ;	upstream_gene_variant ; folB ; c.-3351T>C ; . ; . ; . ; . ;
NC_000964.3	83340	G	T	225	hom	201	201	pabB	gene-BSU_00740	82864	84276	+	missense_variant ; pabB ; c.477G>T ; p.Gln159His ; 477/1413 ; 477/1413 ; 159/470 ;	missense_variant ; pabB ; c.477G>T ; p.Gln159His ; 477/1413 ; 477/1413 ; 159/470 ;	upstream_gene_variant ; pabA ; c.-950G>T ; . ; . ; . ; . ;	upstream_gene_variant ; pabC ; c.-1534G>T ; . ; . ; . ; . ;	upstream_gene_variant ; folP ; c.-2397G>T ; . ; . ; . ; . ;	upstream_gene_variant ; folB ; c.-3247G>T ; . ; . ; . ; . ;
NC_000964.3	83357	A	G	225	hom	210	210	pabB	gene-BSU_00740	82864	84276	+	missense_variant ; pabB ; c.494A>G ; p.Lys165Arg ; 494/1413 ; 494/1413 ; 165/470 ;	missense_variant ; pabB ; c.494A>G ; p.Lys165Arg ; 494/1413 ; 494/1413 ; 165/470 ;	upstream_gene_variant ; pabA ; c.-933A>G ; . ; . ; . ; . ;	upstream_gene_variant ; pabC ; c.-1517A>G ; . ; . ; . ; . ;	upstream_gene_variant ; folP ; c.-2380A>G ; . ; . ; . ; . ;	upstream_gene_variant ; folB ; c.-3230A>G ; . ; . ; . ; . ;
NC_000964.3	83383	T	C	225	hom	206	206	pabB	gene-BSU_00740	82864	84276	+	synonymous_variant ; pabB ; c.520T>C ; p.Leu174Leu ; 520/1413 ; 520/1413 ; 174/470 ;	synonymous_variant ; pabB ; c.520T>C ; p.Leu174Leu ; 520/1413 ; 520/1413 ; 174/470 ;	upstream_gene_variant ; pabA ; c.-907T>C ; . ; . ; . ; . ;	upstream_gene_variant ; pabC ; c.-1491T>C ; . ; . ; . ; . ;	upstream_gene_variant ; folP ; c.-2354T>C ; . ; . ; . ; . ;	upstream_gene_variant ; folB ; c.-3204T>C ; . ; . ; . ; . ;
NC_000964.3	83404	A	T	225	hom	196	196	pabB	gene-BSU_00740	82864	84276	+	missense_variant ; pabB ; c.541A>T ; p.Thr181Ser ; 541/1413 ; 541/1413 ; 181/470 ;	missense_variant ; pabB ; c.541A>T ; p.Thr181Ser ; 541/1413 ; 541/1413 ; 181/470 ;	upstream_gene_variant ; pabA ; c.-886A>T ; . ; . ; . ; . ;	upstream_gene_variant ; pabC ; c.-1470A>T ; . ; . ; . ; . ;	upstream_gene_variant ; folP ; c.-2333A>T ; . ; . ; . ; . ;	upstream_gene_variant ; folB ; c.-3183A>T ; . ; . ; . ; . ;
NC_000964.3	83413	G	A	225	hom	195	195	pabB	gene-BSU_00740	82864	84276	+	missense_variant ; pabB ; c.550G>A ; p.Glu184Lys ; 550/1413 ; 550/1413 ; 184/470 ;	missense_variant ; pabB ; c.550G>A ; p.Glu184Lys ; 550/1413 ; 550/1413 ; 184/470 ;	upstream_gene_variant ; pabA ; c.-877G>A ; . ; . ; . ; . ;	upstream_gene_variant ; pabC ; c.-1461G>A ; . ; . ; . ; . ;	upstream_gene_variant ; folP ; c.-2324G>A ; . ; . ; . ; . ;	upstream_gene_variant ; folB ; c.-3174G>A ; . ; . ; . ; . ;
NC_000964.3	83423	C	A	225	hom	203	203	pabB	gene-BSU_00740	82864	84276	+	missense_variant ; pabB ; c.560C>A ; p.Pro187His ; 560/1413 ; 560/1413 ; 187/470 ;	missense_variant ; pabB ; c.560C>A ; p.Pro187His ; 560/1413 ; 560/1413 ; 187/470 ;	upstream_gene_variant ; pabA ; c.-867C>A ; . ; . ; . ; . ;	upstream_gene_variant ; pabC ; c.-1451C>A ; . ; . ; . ; . ;	upstream_gene_variant ; folP ; c.-2314C>A ; . ; . ; . ; . ;	upstream_gene_variant ; folB ; c.-3164C>A ; . ; . ; . ; . ;
NC_000964.3	83432	C	A	225	hom	206	206	pabB	gene-BSU_00740	82864	84276	+	missense_variant ; pabB ; c.569C>A ; p.Ala190Asp ; 569/1413 ; 569/1413 ; 190/470 ;	missense_variant ; pabB ; c.569C>A ; p.Ala190Asp ; 569/1413 ; 569/1413 ; 190/470 ;	upstream_gene_variant ; pabA ; c.-858C>A ; . ; . ; . ; . ;	upstream_gene_variant ; pabC ; c.-1442C>A ; . ; . ; . ; . ;	upstream_gene_variant ; folP ; c.-2305C>A ; . ; . ; . ; . ;	upstream_gene_variant ; folB ; c.-3155C>A ; . ; . ; . ; . ;
NC_000964.3	83439	T	C	225	hom	195	195	pabB	gene-BSU_00740	82864	84276	+	synonymous_variant ; pabB ; c.576T>C ; p.Ser192Ser ; 576/1413 ; 576/1413 ; 192/470 ;	synonymous_variant ; pabB ; c.576T>C ; p.Ser192Ser ; 576/1413 ; 576/1413 ; 192/470 ;	upstream_gene_variant ; pabA ; c.-851T>C ; . ; . ; . ; . ;	upstream_gene_variant ; pabC ; c.-1435T>C ; . ; . ; . ; . ;	upstream_gene_variant ; folP ; c.-2298T>C ; . ; . ; . ; . ;	upstream_gene_variant ; folB ; c.-3148T>C ; . ; . ; . ; . ;
NC_000964.3	83561	T	C	225	hom	198	198	pabB	gene-BSU_00740	82864	84276	+	missense_variant ; pabB ; c.698T>C ; p.Val233Ala ; 698/1413 ; 698/1413 ; 233/470 ;	missense_variant ; pabB ; c.698T>C ; p.Val233Ala ; 698/1413 ; 698/1413 ; 233/470 ;	upstream_gene_variant ; pabA ; c.-729T>C ; . ; . ; . ; . ;	upstream_gene_variant ; pabC ; c.-1313T>C ; . ; . ; . ; . ;	upstream_gene_variant ; folP ; c.-2176T>C ; . ; . ; . ; . ;	upstream_gene_variant ; folB ; c.-3026T>C ; . ; . ; . ; . ;
NC_000964.3	83847	T	G	225	hom	457	457	pabB	gene-BSU_00740	82864	84276	+	synonymous_variant ; pabB ; c.984T>G ; p.Arg328Arg ; 984/1413 ; 984/1413 ; 328/470 ;	synonymous_variant ; pabB ; c.984T>G ; p.Arg328Arg ; 984/1413 ; 984/1413 ; 328/470 ;	upstream_gene_variant ; pabA ; c.-443T>G ; . ; . ; . ; . ;	upstream_gene_variant ; pabC ; c.-1027T>G ; . ; . ; . ; . ;	upstream_gene_variant ; folP ; c.-1890T>G ; . ; . ; . ; . ;	upstream_gene_variant ; folB ; c.-2740T>G ; . ; . ; . ; . ;
NC_000964.3	83949	T	C	225	hom	373	373	pabB	gene-BSU_00740	82864	84276	+	synonymous_variant ; pabB ; c.1086T>C ; p.Asp362Asp ; 1086/1413 ; 1086/1413 ; 362/470 ;	synonymous_variant ; pabB ; c.1086T>C ; p.Asp362Asp ; 1086/1413 ; 1086/1413 ; 362/470 ;	upstream_gene_variant ; pabA ; c.-341T>C ; . ; . ; . ; . ;	upstream_gene_variant ; pabC ; c.-925T>C ; . ; . ; . ; . ;	upstream_gene_variant ; folP ; c.-1788T>C ; . ; . ; . ; . ;	upstream_gene_variant ; folB ; c.-2638T>C ; . ; . ; . ; . ;
NC_000964.3	84075	A	G	225	hom	263	263	pabB	gene-BSU_00740	82864	84276	+	synonymous_variant ; pabB ; c.1212A>G ; p.Gly404Gly ; 1212/1413 ; 1212/1413 ; 404/470 ;	synonymous_variant ; pabB ; c.1212A>G ; p.Gly404Gly ; 1212/1413 ; 1212/1413 ; 404/470 ;	upstream_gene_variant ; pabA ; c.-215A>G ; . ; . ; . ; . ;	upstream_gene_variant ; pabC ; c.-799A>G ; . ; . ; . ; . ;	upstream_gene_variant ; folP ; c.-1662A>G ; . ; . ; . ; . ;	upstream_gene_variant ; folB ; c.-2512A>G ; . ; . ; . ; . ;
NC_000964.3	84162	T	C	225	hom	207	207	pabB	gene-BSU_00740	82864	84276	+	synonymous_variant ; pabB ; c.1299T>C ; p.Gly433Gly ; 1299/1413 ; 1299/1413 ; 433/470 ;	synonymous_variant ; pabB ; c.1299T>C ; p.Gly433Gly ; 1299/1413 ; 1299/1413 ; 433/470 ;	upstream_gene_variant ; pabA ; c.-128T>C ; . ; . ; . ; . ;	upstream_gene_variant ; pabC ; c.-712T>C ; . ; . ; . ; . ;	upstream_gene_variant ; folP ; c.-1575T>C ; . ; . ; . ; . ;	upstream_gene_variant ; folB ; c.-2425T>C ; . ; . ; . ; . ;
NC_000964.3	84253	G	A	225	hom	219	219	pabB	gene-BSU_00740	82864	84276	+	missense_variant ; pabB ; c.1390G>A ; p.Glu464Lys ; 1390/1413 ; 1390/1413 ; 464/470 ;	missense_variant ; pabB ; c.1390G>A ; p.Glu464Lys ; 1390/1413 ; 1390/1413 ; 464/470 ;	upstream_gene_variant ; pabA ; c.-37G>A ; . ; . ; . ; . ;	upstream_gene_variant ; pabC ; c.-621G>A ; . ; . ; . ; . ;	upstream_gene_variant ; folP ; c.-1484G>A ; . ; . ; . ; . ;	upstream_gene_variant ; folB ; c.-2334G>A ; . ; . ; . ; . ;
NC_000964.3	84400	T	A	225	hom	201	201	pabA	gene-BSU_00750	84290	84874	+	missense_variant ; pabA ; c.111T>A ; p.Asp37Glu ; 111/585 ; 111/585 ; 37/194 ;	missense_variant ; pabA ; c.111T>A ; p.Asp37Glu ; 111/585 ; 111/585 ; 37/194 ;	upstream_gene_variant ; pabC ; c.-474T>A ; . ; . ; . ; . ;	upstream_gene_variant ; folP ; c.-1337T>A ; . ; . ; . ; . ;	upstream_gene_variant ; folB ; c.-2187T>A ; . ; . ; . ; . ;	upstream_gene_variant ; folK ; c.-2546T>A ; . ; . ; . ; . ;
NC_000964.3	84442	C	T	225	hom	202	202	pabA	gene-BSU_00750	84290	84874	+	synonymous_variant ; pabA ; c.153C>T ; p.Pro51Pro ; 153/585 ; 153/585 ; 51/194 ;	synonymous_variant ; pabA ; c.153C>T ; p.Pro51Pro ; 153/585 ; 153/585 ; 51/194 ;	upstream_gene_variant ; pabC ; c.-432C>T ; . ; . ; . ; . ;	upstream_gene_variant ; folP ; c.-1295C>T ; . ; . ; . ; . ;	upstream_gene_variant ; folB ; c.-2145C>T ; . ; . ; . ; . ;	upstream_gene_variant ; folK ; c.-2504C>T ; . ; . ; . ; . ;
NC_000964.3	84475	C	T	225	hom	177	177	pabA	gene-BSU_00750	84290	84874	+	synonymous_variant ; pabA ; c.186C>T ; p.Ser62Ser ; 186/585 ; 186/585 ; 62/194 ;	synonymous_variant ; pabA ; c.186C>T ; p.Ser62Ser ; 186/585 ; 186/585 ; 62/194 ;	upstream_gene_variant ; pabC ; c.-399C>T ; . ; . ; . ; . ;	upstream_gene_variant ; folP ; c.-1262C>T ; . ; . ; . ; . ;	upstream_gene_variant ; folB ; c.-2112C>T ; . ; . ; . ; . ;	upstream_gene_variant ; folK ; c.-2471C>T ; . ; . ; . ; . ;
NC_000964.3	84559	T	C	225	hom	186	186	pabA	gene-BSU_00750	84290	84874	+	synonymous_variant ; pabA ; c.270T>C ; p.Gly90Gly ; 270/585 ; 270/585 ; 90/194 ;	synonymous_variant ; pabA ; c.270T>C ; p.Gly90Gly ; 270/585 ; 270/585 ; 90/194 ;	upstream_gene_variant ; pabC ; c.-315T>C ; . ; . ; . ; . ;	upstream_gene_variant ; folP ; c.-1178T>C ; . ; . ; . ; . ;	upstream_gene_variant ; folB ; c.-2028T>C ; . ; . ; . ; . ;	upstream_gene_variant ; folK ; c.-2387T>C ; . ; . ; . ; . ;
NC_000964.3	84649	T	C	225	hom	150	150	pabA	gene-BSU_00750	84290	84874	+	synonymous_variant ; pabA ; c.360T>C ; p.Asn120Asn ; 360/585 ; 360/585 ; 120/194 ;	synonymous_variant ; pabA ; c.360T>C ; p.Asn120Asn ; 360/585 ; 360/585 ; 120/194 ;	upstream_gene_variant ; pabC ; c.-225T>C ; . ; . ; . ; . ;	upstream_gene_variant ; folP ; c.-1088T>C ; . ; . ; . ; . ;	upstream_gene_variant ; folB ; c.-1938T>C ; . ; . ; . ; . ;	upstream_gene_variant ; folK ; c.-2297T>C ; . ; . ; . ; . ;
NC_000964.3	84705	G	A	225	hom	160	160	pabA	gene-BSU_00750	84290	84874	+	missense_variant ; pabA ; c.416G>A ; p.Ser139Asn ; 416/585 ; 416/585 ; 139/194 ;	missense_variant ; pabA ; c.416G>A ; p.Ser139Asn ; 416/585 ; 416/585 ; 139/194 ;	upstream_gene_variant ; pabC ; c.-169G>A ; . ; . ; . ; . ;	upstream_gene_variant ; folP ; c.-1032G>A ; . ; . ; . ; . ;	upstream_gene_variant ; folB ; c.-1882G>A ; . ; . ; . ; . ;	upstream_gene_variant ; folK ; c.-2241G>A ; . ; . ; . ; . ;
NC_000964.3	84781	T	C	225	hom	123	123	pabA	gene-BSU_00750	84290	84874	+	synonymous_variant ; pabA ; c.492T>C ; p.Gly164Gly ; 492/585 ; 492/585 ; 164/194 ;	synonymous_variant ; pabA ; c.492T>C ; p.Gly164Gly ; 492/585 ; 492/585 ; 164/194 ;	upstream_gene_variant ; pabC ; c.-93T>C ; . ; . ; . ; . ;	upstream_gene_variant ; folP ; c.-956T>C ; . ; . ; . ; . ;	upstream_gene_variant ; folB ; c.-1806T>C ; . ; . ; . ; . ;	upstream_gene_variant ; folK ; c.-2165T>C ; . ; . ; . ; . ;
NC_000964.3	85017	G	A	225	hom	110	110	pabC	gene-BSU_00760	84874	85755	+	synonymous_variant ; pabC ; c.144G>A ; p.Glu48Glu ; 144/882 ; 144/882 ; 48/293 ;	synonymous_variant ; pabC ; c.144G>A ; p.Glu48Glu ; 144/882 ; 144/882 ; 48/293 ;	upstream_gene_variant ; folP ; c.-720G>A ; . ; . ; . ; . ;	upstream_gene_variant ; folB ; c.-1570G>A ; . ; . ; . ; . ;	upstream_gene_variant ; folK ; c.-1929G>A ; . ; . ; . ; . ;	upstream_gene_variant ; yazB ; c.-2384G>A ; . ; . ; . ; . ;
NC_000964.3	85200	C	G	228	hom	143	142	pabC	gene-BSU_00760	84874	85755	+	synonymous_variant ; pabC ; c.327C>G ; p.Pro109Pro ; 327/882 ; 327/882 ; 109/293 ;	synonymous_variant ; pabC ; c.327C>G ; p.Pro109Pro ; 327/882 ; 327/882 ; 109/293 ;	upstream_gene_variant ; folP ; c.-537C>G ; . ; . ; . ; . ;	upstream_gene_variant ; folB ; c.-1387C>G ; . ; . ; . ; . ;	upstream_gene_variant ; folK ; c.-1746C>G ; . ; . ; . ; . ;	upstream_gene_variant ; yazB ; c.-2201C>G ; . ; . ; . ; . ;
NC_000964.3	85522	G	A	225	hom	309	309	pabC	gene-BSU_00760	84874	85755	+	missense_variant ; pabC ; c.649G>A ; p.Asp217Asn ; 649/882 ; 649/882 ; 217/293 ;	missense_variant ; pabC ; c.649G>A ; p.Asp217Asn ; 649/882 ; 649/882 ; 217/293 ;	upstream_gene_variant ; folP ; c.-215G>A ; . ; . ; . ; . ;	upstream_gene_variant ; folB ; c.-1065G>A ; . ; . ; . ; . ;	upstream_gene_variant ; folK ; c.-1424G>A ; . ; . ; . ; . ;	upstream_gene_variant ; yazB ; c.-1879G>A ; . ; . ; . ; . ;
NC_000964.3	85716	T	G	225	hom	382	382	pabC	gene-BSU_00760	84874	85755	+	missense_variant ; pabC ; c.843T>G ; p.Ile281Met ; 843/882 ; 843/882 ; 281/293 ;	missense_variant ; pabC ; c.843T>G ; p.Ile281Met ; 843/882 ; 843/882 ; 281/293 ;	upstream_gene_variant ; folP ; c.-21T>G ; . ; . ; . ; . ;	upstream_gene_variant ; folB ; c.-871T>G ; . ; . ; . ; . ;	upstream_gene_variant ; folK ; c.-1230T>G ; . ; . ; . ; . ;	upstream_gene_variant ; yazB ; c.-1685T>G ; . ; . ; . ; . ;
NC_000964.3	85717	C	T	225	hom	382	382	pabC	gene-BSU_00760	84874	85755	+	missense_variant ; pabC ; c.844C>T ; p.His282Tyr ; 844/882 ; 844/882 ; 282/293 ;	missense_variant ; pabC ; c.844C>T ; p.His282Tyr ; 844/882 ; 844/882 ; 282/293 ;	upstream_gene_variant ; folP ; c.-20C>T ; . ; . ; . ; . ;	upstream_gene_variant ; folB ; c.-870C>T ; . ; . ; . ; . ;	upstream_gene_variant ; folK ; c.-1229C>T ; . ; . ; . ; . ;	upstream_gene_variant ; yazB ; c.-1684C>T ; . ; . ; . ; . ;
NC_000964.3	85937	T	C	225	hom	328	328	folP	gene-BSU_00770	85737	86594	+	synonymous_variant ; folP ; c.201T>C ; p.Ile67Ile ; 201/858 ; 201/858 ; 67/285 ;	synonymous_variant ; folP ; c.201T>C ; p.Ile67Ile ; 201/858 ; 201/858 ; 67/285 ;	upstream_gene_variant ; folB ; c.-650T>C ; . ; . ; . ; . ;	upstream_gene_variant ; folK ; c.-1009T>C ; . ; . ; . ; . ;	upstream_gene_variant ; yazB ; c.-1464T>C ; . ; . ; . ; . ;	upstream_gene_variant ; dusB ; c.-1697T>C ; . ; . ; . ; . ;
NC_000964.3	86162	A	T	225	hom	289	289	folP	gene-BSU_00770	85737	86594	+	missense_variant ; folP ; c.426A>T ; p.Glu142Asp ; 426/858 ; 426/858 ; 142/285 ;	missense_variant ; folP ; c.426A>T ; p.Glu142Asp ; 426/858 ; 426/858 ; 142/285 ;	upstream_gene_variant ; folB ; c.-425A>T ; . ; . ; . ; . ;	upstream_gene_variant ; folK ; c.-784A>T ; . ; . ; . ; . ;	upstream_gene_variant ; yazB ; c.-1239A>T ; . ; . ; . ; . ;	upstream_gene_variant ; dusB ; c.-1472A>T ; . ; . ; . ; . ;
NC_000964.3	86180	A	T	225	hom	276	276	folP	gene-BSU_00770	85737	86594	+	synonymous_variant ; folP ; c.444A>T ; p.Val148Val ; 444/858 ; 444/858 ; 148/285 ;	synonymous_variant ; folP ; c.444A>T ; p.Val148Val ; 444/858 ; 444/858 ; 148/285 ;	upstream_gene_variant ; folB ; c.-407A>T ; . ; . ; . ; . ;	upstream_gene_variant ; folK ; c.-766A>T ; . ; . ; . ; . ;	upstream_gene_variant ; yazB ; c.-1221A>T ; . ; . ; . ; . ;	upstream_gene_variant ; dusB ; c.-1454A>T ; . ; . ; . ; . ;
NC_000964.3	86268	G	A	225	hom	241	241	folP	gene-BSU_00770	85737	86594	+	missense_variant ; folP ; c.532G>A ; p.Glu178Lys ; 532/858 ; 532/858 ; 178/285 ;	missense_variant ; folP ; c.532G>A ; p.Glu178Lys ; 532/858 ; 532/858 ; 178/285 ;	upstream_gene_variant ; folB ; c.-319G>A ; . ; . ; . ; . ;	upstream_gene_variant ; folK ; c.-678G>A ; . ; . ; . ; . ;	upstream_gene_variant ; yazB ; c.-1133G>A ; . ; . ; . ; . ;	upstream_gene_variant ; dusB ; c.-1366G>A ; . ; . ; . ; . ;
NC_000964.3	86306	T	C	225	hom	209	209	folP	gene-BSU_00770	85737	86594	+	synonymous_variant ; folP ; c.570T>C ; p.Pro190Pro ; 570/858 ; 570/858 ; 190/285 ;	synonymous_variant ; folP ; c.570T>C ; p.Pro190Pro ; 570/858 ; 570/858 ; 190/285 ;	upstream_gene_variant ; folB ; c.-281T>C ; . ; . ; . ; . ;	upstream_gene_variant ; folK ; c.-640T>C ; . ; . ; . ; . ;	upstream_gene_variant ; yazB ; c.-1095T>C ; . ; . ; . ; . ;	upstream_gene_variant ; dusB ; c.-1328T>C ; . ; . ; . ; . ;
NC_000964.3	86642	C	A	225	hom	221	221	folB	gene-BSU_00780	86587	86949	+	missense_variant ; folB ; c.56C>A ; p.Thr19Lys ; 56/363 ; 56/363 ; 19/120 ;	missense_variant ; folB ; c.56C>A ; p.Thr19Lys ; 56/363 ; 56/363 ; 19/120 ;	upstream_gene_variant ; folK ; c.-304C>A ; . ; . ; . ; . ;	upstream_gene_variant ; yazB ; c.-759C>A ; . ; . ; . ; . ;	upstream_gene_variant ; dusB ; c.-992C>A ; . ; . ; . ; . ;	upstream_gene_variant ; lysS ; c.-2085C>A ; . ; . ; . ; . ;
NC_000964.3	86709	T	C	225	hom	267	267	folB	gene-BSU_00780	86587	86949	+	synonymous_variant ; folB ; c.123T>C ; p.Ala41Ala ; 123/363 ; 123/363 ; 41/120 ;	synonymous_variant ; folB ; c.123T>C ; p.Ala41Ala ; 123/363 ; 123/363 ; 41/120 ;	upstream_gene_variant ; folK ; c.-237T>C ; . ; . ; . ; . ;	upstream_gene_variant ; yazB ; c.-692T>C ; . ; . ; . ; . ;	upstream_gene_variant ; dusB ; c.-925T>C ; . ; . ; . ; . ;	upstream_gene_variant ; lysS ; c.-2018T>C ; . ; . ; . ; . ;
NC_000964.3	86715	G	A	225	hom	273	273	folB	gene-BSU_00780	86587	86949	+	synonymous_variant ; folB ; c.129G>A ; p.Gln43Gln ; 129/363 ; 129/363 ; 43/120 ;	synonymous_variant ; folB ; c.129G>A ; p.Gln43Gln ; 129/363 ; 129/363 ; 43/120 ;	upstream_gene_variant ; folK ; c.-231G>A ; . ; . ; . ; . ;	upstream_gene_variant ; yazB ; c.-686G>A ; . ; . ; . ; . ;	upstream_gene_variant ; dusB ; c.-919G>A ; . ; . ; . ; . ;	upstream_gene_variant ; lysS ; c.-2012G>A ; . ; . ; . ; . ;
NC_000964.3	86793	G	A	225	hom	305	305	folB	gene-BSU_00780	86587	86949	+	synonymous_variant ; folB ; c.207G>A ; p.Val69Val ; 207/363 ; 207/363 ; 69/120 ;	synonymous_variant ; folB ; c.207G>A ; p.Val69Val ; 207/363 ; 207/363 ; 69/120 ;	upstream_gene_variant ; folK ; c.-153G>A ; . ; . ; . ; . ;	upstream_gene_variant ; yazB ; c.-608G>A ; . ; . ; . ; . ;	upstream_gene_variant ; dusB ; c.-841G>A ; . ; . ; . ; . ;	upstream_gene_variant ; lysS ; c.-1934G>A ; . ; . ; . ; . ;
NC_000964.3	86802	G	A	225	hom	310	310	folB	gene-BSU_00780	86587	86949	+	synonymous_variant ; folB ; c.216G>A ; p.Val72Val ; 216/363 ; 216/363 ; 72/120 ;	synonymous_variant ; folB ; c.216G>A ; p.Val72Val ; 216/363 ; 216/363 ; 72/120 ;	upstream_gene_variant ; folK ; c.-144G>A ; . ; . ; . ; . ;	upstream_gene_variant ; yazB ; c.-599G>A ; . ; . ; . ; . ;	upstream_gene_variant ; dusB ; c.-832G>A ; . ; . ; . ; . ;	upstream_gene_variant ; lysS ; c.-1925G>A ; . ; . ; . ; . ;
NC_000964.3	86840	G	A	225	hom	309	309	folB	gene-BSU_00780	86587	86949	+	missense_variant ; folB ; c.254G>A ; p.Gly85Glu ; 254/363 ; 254/363 ; 85/120 ;	missense_variant ; folB ; c.254G>A ; p.Gly85Glu ; 254/363 ; 254/363 ; 85/120 ;	upstream_gene_variant ; folK ; c.-106G>A ; . ; . ; . ; . ;	upstream_gene_variant ; yazB ; c.-561G>A ; . ; . ; . ; . ;	upstream_gene_variant ; dusB ; c.-794G>A ; . ; . ; . ; . ;	upstream_gene_variant ; lysS ; c.-1887G>A ; . ; . ; . ; . ;
NC_000964.3	87141	T	C	225	hom	244	244	folK	gene-BSU_00790	86946	87449	+	synonymous_variant ; folK ; c.196T>C ; p.Leu66Leu ; 196/504 ; 196/504 ; 66/167 ;	synonymous_variant ; folK ; c.196T>C ; p.Leu66Leu ; 196/504 ; 196/504 ; 66/167 ;	upstream_gene_variant ; yazB ; c.-260T>C ; . ; . ; . ; . ;	upstream_gene_variant ; dusB ; c.-493T>C ; . ; . ; . ; . ;	upstream_gene_variant ; lysS ; c.-1586T>C ; . ; . ; . ; . ;	upstream_gene_variant ; rrnJ-16S ; n.-3395T>C ; . ; . ; . ; . ;
NC_000964.3	87158	C	A	225	hom	243	243	folK	gene-BSU_00790	86946	87449	+	synonymous_variant ; folK ; c.213C>A ; p.Leu71Leu ; 213/504 ; 213/504 ; 71/167 ;	synonymous_variant ; folK ; c.213C>A ; p.Leu71Leu ; 213/504 ; 213/504 ; 71/167 ;	upstream_gene_variant ; yazB ; c.-243C>A ; . ; . ; . ; . ;	upstream_gene_variant ; dusB ; c.-476C>A ; . ; . ; . ; . ;	upstream_gene_variant ; lysS ; c.-1569C>A ; . ; . ; . ; . ;	upstream_gene_variant ; rrnJ-16S ; n.-3378C>A ; . ; . ; . ; . ;
NC_000964.3	87207	G	T	225	hom	252	252	folK	gene-BSU_00790	86946	87449	+	missense_variant ; folK ; c.262G>T ; p.Val88Leu ; 262/504 ; 262/504 ; 88/167 ;	missense_variant ; folK ; c.262G>T ; p.Val88Leu ; 262/504 ; 262/504 ; 88/167 ;	upstream_gene_variant ; yazB ; c.-194G>T ; . ; . ; . ; . ;	upstream_gene_variant ; dusB ; c.-427G>T ; . ; . ; . ; . ;	upstream_gene_variant ; lysS ; c.-1520G>T ; . ; . ; . ; . ;	upstream_gene_variant ; rrnJ-16S ; n.-3329G>T ; . ; . ; . ; . ;
NC_000964.3	87469	A	T	225	hom	209	209	yazB	gene-BSU_00800	87401	87610	+	synonymous_variant ; yazB ; c.69A>T ; p.Gly23Gly ; 69/210 ; 69/210 ; 23/69 ;	synonymous_variant ; yazB ; c.69A>T ; p.Gly23Gly ; 69/210 ; 69/210 ; 23/69 ;	upstream_gene_variant ; dusB ; c.-165A>T ; . ; . ; . ; . ;	upstream_gene_variant ; lysS ; c.-1258A>T ; . ; . ; . ; . ;	upstream_gene_variant ; rrnJ-16S ; n.-3067A>T ; . ; . ; . ; . ;	upstream_gene_variant ; rrnJ-23S ; n.-4785A>T ; . ; . ; . ; . ;
NC_000964.3	87538	T	A	225	hom	231	231	yazB	gene-BSU_00800	87401	87610	+	synonymous_variant ; yazB ; c.138T>A ; p.Ser46Ser ; 138/210 ; 138/210 ; 46/69 ;	synonymous_variant ; yazB ; c.138T>A ; p.Ser46Ser ; 138/210 ; 138/210 ; 46/69 ;	upstream_gene_variant ; dusB ; c.-96T>A ; . ; . ; . ; . ;	upstream_gene_variant ; lysS ; c.-1189T>A ; . ; . ; . ; . ;	upstream_gene_variant ; rrnJ-16S ; n.-2998T>A ; . ; . ; . ; . ;	upstream_gene_variant ; rrnJ-23S ; n.-4716T>A ; . ; . ; . ; . ;
NC_000964.3	87562	A	T	225	hom	237	237	yazB	gene-BSU_00800	87401	87610	+	synonymous_variant ; yazB ; c.162A>T ; p.Ala54Ala ; 162/210 ; 162/210 ; 54/69 ;	synonymous_variant ; yazB ; c.162A>T ; p.Ala54Ala ; 162/210 ; 162/210 ; 54/69 ;	upstream_gene_variant ; dusB ; c.-72A>T ; . ; . ; . ; . ;	upstream_gene_variant ; lysS ; c.-1165A>T ; . ; . ; . ; . ;	upstream_gene_variant ; rrnJ-16S ; n.-2974A>T ; . ; . ; . ; . ;	upstream_gene_variant ; rrnJ-23S ; n.-4692A>T ; . ; . ; . ; . ;
NC_000964.3	87825	T	C	228	hom	215	214	dusB	gene-BSU_00810	87634	88635	+	synonymous_variant ; dusB ; c.192T>C ; p.Arg64Arg ; 192/1002 ; 192/1002 ; 64/333 ;	synonymous_variant ; dusB ; c.192T>C ; p.Arg64Arg ; 192/1002 ; 192/1002 ; 64/333 ;	upstream_gene_variant ; lysS ; c.-902T>C ; . ; . ; . ; . ;	upstream_gene_variant ; rrnJ-16S ; n.-2711T>C ; . ; . ; . ; . ;	upstream_gene_variant ; rrnJ-23S ; n.-4429T>C ; . ; . ; . ; . ;	downstream_gene_variant ; pabB ; c.*3549T>C ; . ; . ; . ; . ;
NC_000964.3	87990	T	C	225	hom	264	264	dusB	gene-BSU_00810	87634	88635	+	synonymous_variant ; dusB ; c.357T>C ; p.Asp119Asp ; 357/1002 ; 357/1002 ; 119/333 ;	synonymous_variant ; dusB ; c.357T>C ; p.Asp119Asp ; 357/1002 ; 357/1002 ; 119/333 ;	upstream_gene_variant ; lysS ; c.-737T>C ; . ; . ; . ; . ;	upstream_gene_variant ; rrnJ-16S ; n.-2546T>C ; . ; . ; . ; . ;	upstream_gene_variant ; rrnJ-23S ; n.-4264T>C ; . ; . ; . ; . ;	downstream_gene_variant ; pabB ; c.*3714T>C ; . ; . ; . ; . ;
NC_000964.3	88041	G	A	225	hom	321	321	dusB	gene-BSU_00810	87634	88635	+	synonymous_variant ; dusB ; c.408G>A ; p.Lys136Lys ; 408/1002 ; 408/1002 ; 136/333 ;	synonymous_variant ; dusB ; c.408G>A ; p.Lys136Lys ; 408/1002 ; 408/1002 ; 136/333 ;	upstream_gene_variant ; lysS ; c.-686G>A ; . ; . ; . ; . ;	upstream_gene_variant ; rrnJ-16S ; n.-2495G>A ; . ; . ; . ; . ;	upstream_gene_variant ; rrnJ-23S ; n.-4213G>A ; . ; . ; . ; . ;	downstream_gene_variant ; pabB ; c.*3765G>A ; . ; . ; . ; . ;
NC_000964.3	88206	A	T	225	hom	485	485	dusB	gene-BSU_00810	87634	88635	+	synonymous_variant ; dusB ; c.573A>T ; p.Val191Val ; 573/1002 ; 573/1002 ; 191/333 ;	synonymous_variant ; dusB ; c.573A>T ; p.Val191Val ; 573/1002 ; 573/1002 ; 191/333 ;	upstream_gene_variant ; lysS ; c.-521A>T ; . ; . ; . ; . ;	upstream_gene_variant ; rrnJ-16S ; n.-2330A>T ; . ; . ; . ; . ;	upstream_gene_variant ; rrnJ-23S ; n.-4048A>T ; . ; . ; . ; . ;	downstream_gene_variant ; pabB ; c.*3930A>T ; . ; . ; . ; . ;
NC_000964.3	88326	T	C	225	hom	478	478	dusB	gene-BSU_00810	87634	88635	+	synonymous_variant ; dusB ; c.693T>C ; p.Gly231Gly ; 693/1002 ; 693/1002 ; 231/333 ;	synonymous_variant ; dusB ; c.693T>C ; p.Gly231Gly ; 693/1002 ; 693/1002 ; 231/333 ;	upstream_gene_variant ; lysS ; c.-401T>C ; . ; . ; . ; . ;	upstream_gene_variant ; rrnJ-16S ; n.-2210T>C ; . ; . ; . ; . ;	upstream_gene_variant ; rrnJ-23S ; n.-3928T>C ; . ; . ; . ; . ;	downstream_gene_variant ; pabB ; c.*4050T>C ; . ; . ; . ; . ;
NC_000964.3	88372	A	G	225	hom	447	447	dusB	gene-BSU_00810	87634	88635	+	missense_variant ; dusB ; c.739A>G ; p.Lys247Glu ; 739/1002 ; 739/1002 ; 247/333 ;	missense_variant ; dusB ; c.739A>G ; p.Lys247Glu ; 739/1002 ; 739/1002 ; 247/333 ;	upstream_gene_variant ; lysS ; c.-355A>G ; . ; . ; . ; . ;	upstream_gene_variant ; rrnJ-16S ; n.-2164A>G ; . ; . ; . ; . ;	upstream_gene_variant ; rrnJ-23S ; n.-3882A>G ; . ; . ; . ; . ;	downstream_gene_variant ; pabB ; c.*4096A>G ; . ; . ; . ; . ;
NC_000964.3	88912	G	T	225	hom	219	219	lysS	gene-BSU_00820	88727	90226	+	synonymous_variant ; lysS ; c.186G>T ; p.Ala62Ala ; 186/1500 ; 186/1500 ; 62/499 ;	synonymous_variant ; lysS ; c.186G>T ; p.Ala62Ala ; 186/1500 ; 186/1500 ; 62/499 ;	upstream_gene_variant ; rrnJ-16S ; n.-1624G>T ; . ; . ; . ; . ;	upstream_gene_variant ; rrnJ-23S ; n.-3342G>T ; . ; . ; . ; . ;	downstream_gene_variant ; pabB ; c.*4636G>T ; . ; . ; . ; . ;	downstream_gene_variant ; pabA ; c.*4038G>T ; . ; . ; . ; . ;
NC_000964.3	89125	T	C	225	hom	205	205	lysS	gene-BSU_00820	88727	90226	+	synonymous_variant ; lysS ; c.399T>C ; p.Ser133Ser ; 399/1500 ; 399/1500 ; 133/499 ;	synonymous_variant ; lysS ; c.399T>C ; p.Ser133Ser ; 399/1500 ; 399/1500 ; 133/499 ;	upstream_gene_variant ; rrnJ-16S ; n.-1411T>C ; . ; . ; . ; . ;	upstream_gene_variant ; rrnJ-23S ; n.-3129T>C ; . ; . ; . ; . ;	downstream_gene_variant ; pabB ; c.*4849T>C ; . ; . ; . ; . ;	downstream_gene_variant ; pabA ; c.*4251T>C ; . ; . ; . ; . ;
NC_000964.3	89302	G	A	225	hom	276	276	lysS	gene-BSU_00820	88727	90226	+	synonymous_variant ; lysS ; c.576G>A ; p.Arg192Arg ; 576/1500 ; 576/1500 ; 192/499 ;	synonymous_variant ; lysS ; c.576G>A ; p.Arg192Arg ; 576/1500 ; 576/1500 ; 192/499 ;	upstream_gene_variant ; rrnJ-16S ; n.-1234G>A ; . ; . ; . ; . ;	upstream_gene_variant ; rrnJ-23S ; n.-2952G>A ; . ; . ; . ; . ;	downstream_gene_variant ; pabA ; c.*4428G>A ; . ; . ; . ; . ;	downstream_gene_variant ; pabC ; c.*3547G>A ; . ; . ; . ; . ;
NC_000964.3	89758	G	A	225	hom	279	279	lysS	gene-BSU_00820	88727	90226	+	synonymous_variant ; lysS ; c.1032G>A ; p.Glu344Glu ; 1032/1500 ; 1032/1500 ; 344/499 ;	synonymous_variant ; lysS ; c.1032G>A ; p.Glu344Glu ; 1032/1500 ; 1032/1500 ; 344/499 ;	upstream_gene_variant ; rrnJ-16S ; n.-778G>A ; . ; . ; . ; . ;	upstream_gene_variant ; rrnJ-23S ; n.-2496G>A ; . ; . ; . ; . ;	downstream_gene_variant ; pabA ; c.*4884G>A ; . ; . ; . ; . ;	downstream_gene_variant ; pabC ; c.*4003G>A ; . ; . ; . ; . ;
NC_000964.3	89787	A	G	225	hom	254	254	lysS	gene-BSU_00820	88727	90226	+	missense_variant ; lysS ; c.1061A>G ; p.Glu354Gly ; 1061/1500 ; 1061/1500 ; 354/499 ;	missense_variant ; lysS ; c.1061A>G ; p.Glu354Gly ; 1061/1500 ; 1061/1500 ; 354/499 ;	upstream_gene_variant ; rrnJ-16S ; n.-749A>G ; . ; . ; . ; . ;	upstream_gene_variant ; rrnJ-23S ; n.-2467A>G ; . ; . ; . ; . ;	downstream_gene_variant ; pabA ; c.*4913A>G ; . ; . ; . ; . ;	downstream_gene_variant ; pabC ; c.*4032A>G ; . ; . ; . ; . ;
NC_000964.3	89818	C	G	225	hom	199	199	lysS	gene-BSU_00820	88727	90226	+	synonymous_variant ; lysS ; c.1092C>G ; p.Gly364Gly ; 1092/1500 ; 1092/1500 ; 364/499 ;	synonymous_variant ; lysS ; c.1092C>G ; p.Gly364Gly ; 1092/1500 ; 1092/1500 ; 364/499 ;	upstream_gene_variant ; rrnJ-16S ; n.-718C>G ; . ; . ; . ; . ;	upstream_gene_variant ; rrnJ-23S ; n.-2436C>G ; . ; . ; . ; . ;	downstream_gene_variant ; pabA ; c.*4944C>G ; . ; . ; . ; . ;	downstream_gene_variant ; pabC ; c.*4063C>G ; . ; . ; . ; . ;
NC_000964.3	89842	A	G	225	hom	169	169	lysS	gene-BSU_00820	88727	90226	+	synonymous_variant ; lysS ; c.1116A>G ; p.Glu372Glu ; 1116/1500 ; 1116/1500 ; 372/499 ;	synonymous_variant ; lysS ; c.1116A>G ; p.Glu372Glu ; 1116/1500 ; 1116/1500 ; 372/499 ;	upstream_gene_variant ; rrnJ-16S ; n.-694A>G ; . ; . ; . ; . ;	upstream_gene_variant ; rrnJ-23S ; n.-2412A>G ; . ; . ; . ; . ;	downstream_gene_variant ; pabA ; c.*4968A>G ; . ; . ; . ; . ;	downstream_gene_variant ; pabC ; c.*4087A>G ; . ; . ; . ; . ;
NC_000964.3	90077	T	C	225	hom	179	179	lysS	gene-BSU_00820	88727	90226	+	synonymous_variant ; lysS ; c.1351T>C ; p.Leu451Leu ; 1351/1500 ; 1351/1500 ; 451/499 ;	synonymous_variant ; lysS ; c.1351T>C ; p.Leu451Leu ; 1351/1500 ; 1351/1500 ; 451/499 ;	upstream_gene_variant ; rrnJ-16S ; n.-459T>C ; . ; . ; . ; . ;	upstream_gene_variant ; rrnJ-23S ; n.-2177T>C ; . ; . ; . ; . ;	downstream_gene_variant ; pabC ; c.*4322T>C ; . ; . ; . ; . ;	downstream_gene_variant ; folP ; c.*3483T>C ; . ; . ; . ; . ;
NC_000964.3	90230	A	G	225	hom	136	136	.	.	.	.	.	.	upstream_gene_variant ; rrnJ-16S ; n.-306A>G ; . ; . ; . ; . ;	upstream_gene_variant ; rrnJ-23S ; n.-2024A>G ; . ; . ; . ; . ;	downstream_gene_variant ; pabC ; c.*4475A>G ; . ; . ; . ; . ;	downstream_gene_variant ; folP ; c.*3636A>G ; . ; . ; . ; . ;	downstream_gene_variant ; folB ; c.*3281A>G ; . ; . ; . ; . ;
NC_000964.3	90231	A	G	225	hom	136	136	.	.	.	.	.	.	upstream_gene_variant ; rrnJ-16S ; n.-305A>G ; . ; . ; . ; . ;	upstream_gene_variant ; rrnJ-23S ; n.-2023A>G ; . ; . ; . ; . ;	downstream_gene_variant ; pabC ; c.*4476A>G ; . ; . ; . ; . ;	downstream_gene_variant ; folP ; c.*3637A>G ; . ; . ; . ; . ;	downstream_gene_variant ; folB ; c.*3282A>G ; . ; . ; . ; . ;
NC_000964.3	90277	C	T	225	hom	114	114	.	.	.	.	.	.	upstream_gene_variant ; rrnJ-16S ; n.-259C>T ; . ; . ; . ; . ;	upstream_gene_variant ; rrnJ-23S ; n.-1977C>T ; . ; . ; . ; . ;	upstream_gene_variant ; rrnJ-5S ; n.-4960C>T ; . ; . ; . ; . ;	downstream_gene_variant ; pabC ; c.*4522C>T ; . ; . ; . ; . ;	downstream_gene_variant ; folP ; c.*3683C>T ; . ; . ; . ; . ;
NC_000964.3	90491	AG	A	228	hom	260	133	.	.	.	.	.	.	upstream_gene_variant ; rrnJ-16S ; n.-44delG ; . ; . ; . ; . ;	upstream_gene_variant ; rrnJ-23S ; n.-1762delG ; . ; . ; . ; . ;	upstream_gene_variant ; rrnJ-5S ; n.-4745delG ; . ; . ; . ; . ;	upstream_gene_variant ; trnJ-Val ; c.-4883delG ; . ; . ; . ; . ;	upstream_gene_variant ; trnJ-Thr ; c.-4963delG ; . ; . ; . ; . ;
NC_000964.3	90499	A	T	228	hom	273	123	.	.	.	.	.	.	upstream_gene_variant ; rrnJ-16S ; n.-37A>T ; . ; . ; . ; . ;	upstream_gene_variant ; rrnJ-23S ; n.-1755A>T ; . ; . ; . ; . ;	upstream_gene_variant ; rrnJ-5S ; n.-4738A>T ; . ; . ; . ; . ;	upstream_gene_variant ; trnJ-Val ; c.-4876A>T ; . ; . ; . ; . ;	upstream_gene_variant ; trnJ-Thr ; c.-4956A>T ; . ; . ; . ; . ;
NC_000964.3	90512	G	A	228	hom	299	117	.	.	.	.	.	.	upstream_gene_variant ; rrnJ-16S ; n.-24G>A ; . ; . ; . ; . ;	upstream_gene_variant ; rrnJ-23S ; n.-1742G>A ; . ; . ; . ; . ;	upstream_gene_variant ; rrnJ-5S ; n.-4725G>A ; . ; . ; . ; . ;	upstream_gene_variant ; trnJ-Val ; c.-4863G>A ; . ; . ; . ; . ;	upstream_gene_variant ; trnJ-Thr ; c.-4943G>A ; . ; . ; . ; . ;
NC_000964.3	90766	G	A	80	hom	80	80	rrnJ-16S	gene-BSU_rRNA_6	90536	92089	+	non_coding_transcript_exon_variant ; rrnJ-16S ; n.231G>A ; . ; . ; . ; . ;	upstream_gene_variant ; rrnJ-23S ; n.-1488G>A ; . ; . ; . ; . ;	upstream_gene_variant ; rrnJ-5S ; n.-4471G>A ; . ; . ; . ; . ;	upstream_gene_variant ; trnJ-Val ; c.-4609G>A ; . ; . ; . ; . ;	upstream_gene_variant ; trnJ-Thr ; c.-4689G>A ; . ; . ; . ; . ;	upstream_gene_variant ; trnJ-Lys ; c.-4801G>A ; . ; . ; . ; . ;
NC_000964.3	95201	T	C	166	hom	213	146	.	.	.	.	.	.	upstream_gene_variant ; rrnJ-5S ; n.-36T>C ; . ; . ; . ; . ;	upstream_gene_variant ; trnJ-Val ; c.-174T>C ; . ; . ; . ; . ;	upstream_gene_variant ; trnJ-Thr ; c.-254T>C ; . ; . ; . ; . ;	upstream_gene_variant ; trnJ-Lys ; c.-366T>C ; . ; . ; . ; . ;	upstream_gene_variant ; trnJ-Leu1 ; c.-448T>C ; . ; . ; . ; . ;
NC_000964.3	95549	C	T	225	hom	186	186	.	.	.	.	.	.	upstream_gene_variant ; trnJ-Lys ; c.-18C>T ; . ; . ; . ; . ;	upstream_gene_variant ; trnJ-Leu1 ; c.-100C>T ; . ; . ; . ; . ;	upstream_gene_variant ; trnJ-Gly ; c.-223C>T ; . ; . ; . ; . ;	upstream_gene_variant ; trnJ-Leu2 ; c.-312C>T ; . ; . ; . ; . ;	upstream_gene_variant ; trnJ-Arg ; c.-407C>T ; . ; . ; . ; . ;
NC_000964.3	96053	A	G	221	het	139	110	.	.	.	.	.	.	upstream_gene_variant ; trnJ-Pro ; c.-7A>G ; . ; . ; . ; . ;	upstream_gene_variant ; trnJ-Ala ; c.-93A>G ; . ; . ; . ; . ;	upstream_gene_variant ; rrnW-16S ; n.-339A>G ; . ; . ; . ; . ;	upstream_gene_variant ; rrnW-23S ; n.-2057A>G ; . ; . ; . ; . ;	downstream_gene_variant ; rrnJ-16S ; n.*3964A>G ; . ; . ; . ; . ;
NC_000964.3	96136	ATTTTTTT	ATTTTTT	123	hom	94	94	trnJ-Pro	gene-BSU_tRNA_19	96060	96136	+	downstream_gene_variant ; trnJ-Pro ; c.*7delT ; . ; . ; . ; . ;	upstream_gene_variant ; trnJ-Ala ; c.-3delT ; . ; . ; . ; . ;	upstream_gene_variant ; rrnW-16S ; n.-249delT ; . ; . ; . ; . ;	upstream_gene_variant ; rrnW-23S ; n.-1967delT ; . ; . ; . ; . ;	upstream_gene_variant ; rrnW-5S ; n.-4950delT ; . ; . ; . ; . ;	downstream_gene_variant ; rrnJ-16S ; n.*4054delT ; . ; . ; . ; . ;
NC_000964.3	96225	GTTTTT	GTTTTTTT	228	hom	81	78	.	.	.	.	.	.	upstream_gene_variant ; rrnW-16S ; n.-162_-161insTT ; . ; . ; . ; . ;	upstream_gene_variant ; rrnW-23S ; n.-1880_-1879insTT ; . ; . ; . ; . ;	upstream_gene_variant ; rrnW-5S ; n.-4863_-4862insTT ; . ; . ; . ; . ;	downstream_gene_variant ; rrnJ-16S ; n.*4141_*4142insTT ; . ; . ; . ; . ;	downstream_gene_variant ; rrnJ-23S ; n.*1049_*1050insTT ; . ; . ; . ; . ;
NC_000964.3	96299	CAAAA	CAAA	155	het	196	106	.	.	.	.	.	.	upstream_gene_variant ; rrnW-16S ; n.-89delA ; . ; . ; . ; . ;	upstream_gene_variant ; rrnW-23S ; n.-1807delA ; . ; . ; . ; . ;	upstream_gene_variant ; rrnW-5S ; n.-4790delA ; . ; . ; . ; . ;	downstream_gene_variant ; rrnJ-16S ; n.*4214delA ; . ; . ; . ; . ;	downstream_gene_variant ; rrnJ-23S ; n.*1122delA ; . ; . ; . ; . ;
NC_000964.3	96362	C	T	160	het	473	152	.	.	.	.	.	.	upstream_gene_variant ; rrnW-16S ; n.-30C>T ; . ; . ; . ; . ;	upstream_gene_variant ; rrnW-23S ; n.-1748C>T ; . ; . ; . ; . ;	upstream_gene_variant ; rrnW-5S ; n.-4731C>T ; . ; . ; . ; . ;	downstream_gene_variant ; rrnJ-16S ; n.*4273C>T ; . ; . ; . ; . ;	downstream_gene_variant ; rrnJ-23S ; n.*1181C>T ; . ; . ; . ; . ;
NC_000964.3	101057	T	C	153	hom	116	67	.	.	.	.	.	.	upstream_gene_variant ; rrnW-5S ; n.-36T>C ; . ; . ; . ; . ;	upstream_gene_variant ; ctsR ; c.-392T>C ; . ; . ; . ; . ;	upstream_gene_variant ; mcsA ; c.-870T>C ; . ; . ; . ; . ;	upstream_gene_variant ; mcsB ; c.-1427T>C ; . ; . ; . ; . ;	upstream_gene_variant ; clpC ; c.-2515T>C ; . ; . ; . ; . ;
NC_000964.3	101212	C	T	228	hom	124	117	.	.	.	.	.	.	upstream_gene_variant ; ctsR ; c.-237C>T ; . ; . ; . ; . ;	upstream_gene_variant ; mcsA ; c.-715C>T ; . ; . ; . ; . ;	upstream_gene_variant ; mcsB ; c.-1272C>T ; . ; . ; . ; . ;	upstream_gene_variant ; clpC ; c.-2360C>T ; . ; . ; . ; . ;	upstream_gene_variant ; radA ; c.-4884C>T ; . ; . ; . ; . ;
NC_000964.3	101227	A	T	225	hom	124	124	.	.	.	.	.	.	upstream_gene_variant ; ctsR ; c.-222A>T ; . ; . ; . ; . ;	upstream_gene_variant ; mcsA ; c.-700A>T ; . ; . ; . ; . ;	upstream_gene_variant ; mcsB ; c.-1257A>T ; . ; . ; . ; . ;	upstream_gene_variant ; clpC ; c.-2345A>T ; . ; . ; . ; . ;	upstream_gene_variant ; radA ; c.-4869A>T ; . ; . ; . ; . ;
NC_000964.3	101355	G	A	225	hom	111	111	.	.	.	.	.	.	upstream_gene_variant ; ctsR ; c.-94G>A ; . ; . ; . ; . ;	upstream_gene_variant ; mcsA ; c.-572G>A ; . ; . ; . ; . ;	upstream_gene_variant ; mcsB ; c.-1129G>A ; . ; . ; . ; . ;	upstream_gene_variant ; clpC ; c.-2217G>A ; . ; . ; . ; . ;	upstream_gene_variant ; radA ; c.-4741G>A ; . ; . ; . ; . ;
NC_000964.3	101410	A	T	225	hom	107	107	.	.	.	.	.	.	upstream_gene_variant ; ctsR ; c.-39A>T ; . ; . ; . ; . ;	upstream_gene_variant ; mcsA ; c.-517A>T ; . ; . ; . ; . ;	upstream_gene_variant ; mcsB ; c.-1074A>T ; . ; . ; . ; . ;	upstream_gene_variant ; clpC ; c.-2162A>T ; . ; . ; . ; . ;	upstream_gene_variant ; radA ; c.-4686A>T ; . ; . ; . ; . ;
NC_000964.3	102226	T	G	225	hom	151	151	mcsA	gene-BSU_00840	101927	102484	+	synonymous_variant ; mcsA ; c.300T>G ; p.Ser100Ser ; 300/558 ; 300/558 ; 100/185 ;	synonymous_variant ; mcsA ; c.300T>G ; p.Ser100Ser ; 300/558 ; 300/558 ; 100/185 ;	upstream_gene_variant ; mcsB ; c.-258T>G ; . ; . ; . ; . ;	upstream_gene_variant ; clpC ; c.-1346T>G ; . ; . ; . ; . ;	upstream_gene_variant ; radA ; c.-3870T>G ; . ; . ; . ; . ;	downstream_gene_variant ; rrnW-16S ; n.*4281T>G ; . ; . ; . ; . ;
NC_000964.3	102435	T	C	225	hom	235	235	mcsA	gene-BSU_00840	101927	102484	+	missense_variant ; mcsA ; c.509T>C ; p.Leu170Ser ; 509/558 ; 509/558 ; 170/185 ;	missense_variant ; mcsA ; c.509T>C ; p.Leu170Ser ; 509/558 ; 509/558 ; 170/185 ;	upstream_gene_variant ; mcsB ; c.-49T>C ; . ; . ; . ; . ;	upstream_gene_variant ; clpC ; c.-1137T>C ; . ; . ; . ; . ;	upstream_gene_variant ; radA ; c.-3661T>C ; . ; . ; . ; . ;	downstream_gene_variant ; rrnW-16S ; n.*4490T>C ; . ; . ; . ; . ;
NC_000964.3	102585	A	G	225	hom	180	180	mcsB	gene-BSU_00850	102484	103575	+	synonymous_variant ; mcsB ; c.102A>G ; p.Arg34Arg ; 102/1092 ; 102/1092 ; 34/363 ;	synonymous_variant ; mcsB ; c.102A>G ; p.Arg34Arg ; 102/1092 ; 102/1092 ; 34/363 ;	upstream_gene_variant ; clpC ; c.-987A>G ; . ; . ; . ; . ;	upstream_gene_variant ; radA ; c.-3511A>G ; . ; . ; . ; . ;	upstream_gene_variant ; disA ; c.-4891A>G ; . ; . ; . ; . ;	downstream_gene_variant ; rrnW-16S ; n.*4640A>G ; . ; . ; . ; . ;
NC_000964.3	102735	A	G	225	hom	93	93	mcsB	gene-BSU_00850	102484	103575	+	synonymous_variant ; mcsB ; c.252A>G ; p.Glu84Glu ; 252/1092 ; 252/1092 ; 84/363 ;	synonymous_variant ; mcsB ; c.252A>G ; p.Glu84Glu ; 252/1092 ; 252/1092 ; 84/363 ;	upstream_gene_variant ; clpC ; c.-837A>G ; . ; . ; . ; . ;	upstream_gene_variant ; radA ; c.-3361A>G ; . ; . ; . ; . ;	upstream_gene_variant ; disA ; c.-4741A>G ; . ; . ; . ; . ;	downstream_gene_variant ; rrnW-16S ; n.*4790A>G ; . ; . ; . ; . ;
NC_000964.3	102768	C	T	225	hom	89	89	mcsB	gene-BSU_00850	102484	103575	+	synonymous_variant ; mcsB ; c.285C>T ; p.Ser95Ser ; 285/1092 ; 285/1092 ; 95/363 ;	synonymous_variant ; mcsB ; c.285C>T ; p.Ser95Ser ; 285/1092 ; 285/1092 ; 95/363 ;	upstream_gene_variant ; clpC ; c.-804C>T ; . ; . ; . ; . ;	upstream_gene_variant ; radA ; c.-3328C>T ; . ; . ; . ; . ;	upstream_gene_variant ; disA ; c.-4708C>T ; . ; . ; . ; . ;	downstream_gene_variant ; rrnW-16S ; n.*4823C>T ; . ; . ; . ; . ;
NC_000964.3	102775	T	C	225	hom	91	91	mcsB	gene-BSU_00850	102484	103575	+	synonymous_variant ; mcsB ; c.292T>C ; p.Leu98Leu ; 292/1092 ; 292/1092 ; 98/363 ;	synonymous_variant ; mcsB ; c.292T>C ; p.Leu98Leu ; 292/1092 ; 292/1092 ; 98/363 ;	upstream_gene_variant ; clpC ; c.-797T>C ; . ; . ; . ; . ;	upstream_gene_variant ; radA ; c.-3321T>C ; . ; . ; . ; . ;	upstream_gene_variant ; disA ; c.-4701T>C ; . ; . ; . ; . ;	downstream_gene_variant ; rrnW-16S ; n.*4830T>C ; . ; . ; . ; . ;
NC_000964.3	102930	T	C	225	hom	127	127	mcsB	gene-BSU_00850	102484	103575	+	synonymous_variant ; mcsB ; c.447T>C ; p.Ile149Ile ; 447/1092 ; 447/1092 ; 149/363 ;	synonymous_variant ; mcsB ; c.447T>C ; p.Ile149Ile ; 447/1092 ; 447/1092 ; 149/363 ;	upstream_gene_variant ; clpC ; c.-642T>C ; . ; . ; . ; . ;	upstream_gene_variant ; radA ; c.-3166T>C ; . ; . ; . ; . ;	upstream_gene_variant ; disA ; c.-4546T>C ; . ; . ; . ; . ;	downstream_gene_variant ; rrnW-16S ; n.*4985T>C ; . ; . ; . ; . ;
NC_000964.3	103002	T	A	225	hom	163	163	mcsB	gene-BSU_00850	102484	103575	+	synonymous_variant ; mcsB ; c.519T>A ; p.Thr173Thr ; 519/1092 ; 519/1092 ; 173/363 ;	synonymous_variant ; mcsB ; c.519T>A ; p.Thr173Thr ; 519/1092 ; 519/1092 ; 173/363 ;	upstream_gene_variant ; clpC ; c.-570T>A ; . ; . ; . ; . ;	upstream_gene_variant ; radA ; c.-3094T>A ; . ; . ; . ; . ;	upstream_gene_variant ; disA ; c.-4474T>A ; . ; . ; . ; . ;	downstream_gene_variant ; rrnW-23S ; n.*1965T>A ; . ; . ; . ; . ;
NC_000964.3	103038	G	A	225	hom	165	165	mcsB	gene-BSU_00850	102484	103575	+	synonymous_variant ; mcsB ; c.555G>A ; p.Ala185Ala ; 555/1092 ; 555/1092 ; 185/363 ;	synonymous_variant ; mcsB ; c.555G>A ; p.Ala185Ala ; 555/1092 ; 555/1092 ; 185/363 ;	upstream_gene_variant ; clpC ; c.-534G>A ; . ; . ; . ; . ;	upstream_gene_variant ; radA ; c.-3058G>A ; . ; . ; . ; . ;	upstream_gene_variant ; disA ; c.-4438G>A ; . ; . ; . ; . ;	downstream_gene_variant ; rrnW-23S ; n.*2001G>A ; . ; . ; . ; . ;
NC_000964.3	103302	A	T	225	hom	165	165	mcsB	gene-BSU_00850	102484	103575	+	synonymous_variant ; mcsB ; c.819A>T ; p.Ser273Ser ; 819/1092 ; 819/1092 ; 273/363 ;	synonymous_variant ; mcsB ; c.819A>T ; p.Ser273Ser ; 819/1092 ; 819/1092 ; 273/363 ;	upstream_gene_variant ; clpC ; c.-270A>T ; . ; . ; . ; . ;	upstream_gene_variant ; radA ; c.-2794A>T ; . ; . ; . ; . ;	upstream_gene_variant ; disA ; c.-4174A>T ; . ; . ; . ; . ;	downstream_gene_variant ; rrnW-23S ; n.*2265A>T ; . ; . ; . ; . ;
NC_000964.3	103384	T	C	228	hom	146	145	mcsB	gene-BSU_00850	102484	103575	+	synonymous_variant ; mcsB ; c.901T>C ; p.Leu301Leu ; 901/1092 ; 901/1092 ; 301/363 ;	synonymous_variant ; mcsB ; c.901T>C ; p.Leu301Leu ; 901/1092 ; 901/1092 ; 301/363 ;	upstream_gene_variant ; clpC ; c.-188T>C ; . ; . ; . ; . ;	upstream_gene_variant ; radA ; c.-2712T>C ; . ; . ; . ; . ;	upstream_gene_variant ; disA ; c.-4092T>C ; . ; . ; . ; . ;	downstream_gene_variant ; rrnW-23S ; n.*2347T>C ; . ; . ; . ; . ;
NC_000964.3	103392	A	T	225	hom	142	142	mcsB	gene-BSU_00850	102484	103575	+	synonymous_variant ; mcsB ; c.909A>T ; p.Ile303Ile ; 909/1092 ; 909/1092 ; 303/363 ;	synonymous_variant ; mcsB ; c.909A>T ; p.Ile303Ile ; 909/1092 ; 909/1092 ; 303/363 ;	upstream_gene_variant ; clpC ; c.-180A>T ; . ; . ; . ; . ;	upstream_gene_variant ; radA ; c.-2704A>T ; . ; . ; . ; . ;	upstream_gene_variant ; disA ; c.-4084A>T ; . ; . ; . ; . ;	downstream_gene_variant ; rrnW-23S ; n.*2355A>T ; . ; . ; . ; . ;
NC_000964.3	103449	G	A	225	hom	147	147	mcsB	gene-BSU_00850	102484	103575	+	synonymous_variant ; mcsB ; c.966G>A ; p.Gly322Gly ; 966/1092 ; 966/1092 ; 322/363 ;	synonymous_variant ; mcsB ; c.966G>A ; p.Gly322Gly ; 966/1092 ; 966/1092 ; 322/363 ;	upstream_gene_variant ; clpC ; c.-123G>A ; . ; . ; . ; . ;	upstream_gene_variant ; radA ; c.-2647G>A ; . ; . ; . ; . ;	upstream_gene_variant ; disA ; c.-4027G>A ; . ; . ; . ; . ;	downstream_gene_variant ; rrnW-23S ; n.*2412G>A ; . ; . ; . ; . ;
NC_000964.3	103482	A	T	225	hom	160	160	mcsB	gene-BSU_00850	102484	103575	+	synonymous_variant ; mcsB ; c.999A>T ; p.Arg333Arg ; 999/1092 ; 999/1092 ; 333/363 ;	synonymous_variant ; mcsB ; c.999A>T ; p.Arg333Arg ; 999/1092 ; 999/1092 ; 333/363 ;	upstream_gene_variant ; clpC ; c.-90A>T ; . ; . ; . ; . ;	upstream_gene_variant ; radA ; c.-2614A>T ; . ; . ; . ; . ;	upstream_gene_variant ; disA ; c.-3994A>T ; . ; . ; . ; . ;	downstream_gene_variant ; rrnW-23S ; n.*2445A>T ; . ; . ; . ; . ;
NC_000964.3	103745	A	T	225	hom	180	180	clpC	gene-BSU_00860	103572	106004	+	missense_variant ; clpC ; c.174A>T ; p.Glu58Asp ; 174/2433 ; 174/2433 ; 58/810 ;	missense_variant ; clpC ; c.174A>T ; p.Glu58Asp ; 174/2433 ; 174/2433 ; 58/810 ;	upstream_gene_variant ; radA ; c.-2351A>T ; . ; . ; . ; . ;	upstream_gene_variant ; disA ; c.-3731A>T ; . ; . ; . ; . ;	upstream_gene_variant ; yacL ; c.-4929A>T ; . ; . ; . ; . ;	downstream_gene_variant ; rrnW-23S ; n.*2708A>T ; . ; . ; . ; . ;
NC_000964.3	103880	G	T	225	hom	213	213	clpC	gene-BSU_00860	103572	106004	+	synonymous_variant ; clpC ; c.309G>T ; p.Val103Val ; 309/2433 ; 309/2433 ; 103/810 ;	synonymous_variant ; clpC ; c.309G>T ; p.Val103Val ; 309/2433 ; 309/2433 ; 103/810 ;	upstream_gene_variant ; radA ; c.-2216G>T ; . ; . ; . ; . ;	upstream_gene_variant ; disA ; c.-3596G>T ; . ; . ; . ; . ;	upstream_gene_variant ; yacL ; c.-4794G>T ; . ; . ; . ; . ;	downstream_gene_variant ; rrnW-23S ; n.*2843G>T ; . ; . ; . ; . ;
NC_000964.3	104231	T	A	228	hom	460	459	clpC	gene-BSU_00860	103572	106004	+	synonymous_variant ; clpC ; c.660T>A ; p.Gly220Gly ; 660/2433 ; 660/2433 ; 220/810 ;	synonymous_variant ; clpC ; c.660T>A ; p.Gly220Gly ; 660/2433 ; 660/2433 ; 220/810 ;	upstream_gene_variant ; radA ; c.-1865T>A ; . ; . ; . ; . ;	upstream_gene_variant ; disA ; c.-3245T>A ; . ; . ; . ; . ;	upstream_gene_variant ; yacL ; c.-4443T>A ; . ; . ; . ; . ;	downstream_gene_variant ; rrnW-23S ; n.*3194T>A ; . ; . ; . ; . ;
NC_000964.3	104489	T	C	225	hom	187	187	clpC	gene-BSU_00860	103572	106004	+	synonymous_variant ; clpC ; c.918T>C ; p.Arg306Arg ; 918/2433 ; 918/2433 ; 306/810 ;	synonymous_variant ; clpC ; c.918T>C ; p.Arg306Arg ; 918/2433 ; 918/2433 ; 306/810 ;	upstream_gene_variant ; radA ; c.-1607T>C ; . ; . ; . ; . ;	upstream_gene_variant ; disA ; c.-2987T>C ; . ; . ; . ; . ;	upstream_gene_variant ; yacL ; c.-4185T>C ; . ; . ; . ; . ;	downstream_gene_variant ; rrnW-23S ; n.*3452T>C ; . ; . ; . ; . ;
NC_000964.3	104765	G	A	225	hom	214	214	clpC	gene-BSU_00860	103572	106004	+	synonymous_variant ; clpC ; c.1194G>A ; p.Ala398Ala ; 1194/2433 ; 1194/2433 ; 398/810 ;	synonymous_variant ; clpC ; c.1194G>A ; p.Ala398Ala ; 1194/2433 ; 1194/2433 ; 398/810 ;	upstream_gene_variant ; radA ; c.-1331G>A ; . ; . ; . ; . ;	upstream_gene_variant ; disA ; c.-2711G>A ; . ; . ; . ; . ;	upstream_gene_variant ; yacL ; c.-3909G>A ; . ; . ; . ; . ;	downstream_gene_variant ; rrnW-23S ; n.*3728G>A ; . ; . ; . ; . ;
NC_000964.3	104855	T	C	225	hom	308	308	clpC	gene-BSU_00860	103572	106004	+	synonymous_variant ; clpC ; c.1284T>C ; p.Asp428Asp ; 1284/2433 ; 1284/2433 ; 428/810 ;	synonymous_variant ; clpC ; c.1284T>C ; p.Asp428Asp ; 1284/2433 ; 1284/2433 ; 428/810 ;	upstream_gene_variant ; radA ; c.-1241T>C ; . ; . ; . ; . ;	upstream_gene_variant ; disA ; c.-2621T>C ; . ; . ; . ; . ;	upstream_gene_variant ; yacL ; c.-3819T>C ; . ; . ; . ; . ;	upstream_gene_variant ; ispD ; c.-4934T>C ; . ; . ; . ; . ;
NC_000964.3	105092	C	T	225	hom	256	256	clpC	gene-BSU_00860	103572	106004	+	synonymous_variant ; clpC ; c.1521C>T ; p.His507His ; 1521/2433 ; 1521/2433 ; 507/810 ;	synonymous_variant ; clpC ; c.1521C>T ; p.His507His ; 1521/2433 ; 1521/2433 ; 507/810 ;	upstream_gene_variant ; radA ; c.-1004C>T ; . ; . ; . ; . ;	upstream_gene_variant ; disA ; c.-2384C>T ; . ; . ; . ; . ;	upstream_gene_variant ; yacL ; c.-3582C>T ; . ; . ; . ; . ;	upstream_gene_variant ; ispD ; c.-4697C>T ; . ; . ; . ; . ;
NC_000964.3	105098	T	C	225	hom	255	255	clpC	gene-BSU_00860	103572	106004	+	synonymous_variant ; clpC ; c.1527T>C ; p.Arg509Arg ; 1527/2433 ; 1527/2433 ; 509/810 ;	synonymous_variant ; clpC ; c.1527T>C ; p.Arg509Arg ; 1527/2433 ; 1527/2433 ; 509/810 ;	upstream_gene_variant ; radA ; c.-998T>C ; . ; . ; . ; . ;	upstream_gene_variant ; disA ; c.-2378T>C ; . ; . ; . ; . ;	upstream_gene_variant ; yacL ; c.-3576T>C ; . ; . ; . ; . ;	upstream_gene_variant ; ispD ; c.-4691T>C ; . ; . ; . ; . ;
NC_000964.3	105119	A	G	225	hom	251	251	clpC	gene-BSU_00860	103572	106004	+	synonymous_variant ; clpC ; c.1548A>G ; p.Ala516Ala ; 1548/2433 ; 1548/2433 ; 516/810 ;	synonymous_variant ; clpC ; c.1548A>G ; p.Ala516Ala ; 1548/2433 ; 1548/2433 ; 516/810 ;	upstream_gene_variant ; radA ; c.-977A>G ; . ; . ; . ; . ;	upstream_gene_variant ; disA ; c.-2357A>G ; . ; . ; . ; . ;	upstream_gene_variant ; yacL ; c.-3555A>G ; . ; . ; . ; . ;	upstream_gene_variant ; ispD ; c.-4670A>G ; . ; . ; . ; . ;
NC_000964.3	105128	G	T	225	hom	247	247	clpC	gene-BSU_00860	103572	106004	+	synonymous_variant ; clpC ; c.1557G>T ; p.Ala519Ala ; 1557/2433 ; 1557/2433 ; 519/810 ;	synonymous_variant ; clpC ; c.1557G>T ; p.Ala519Ala ; 1557/2433 ; 1557/2433 ; 519/810 ;	upstream_gene_variant ; radA ; c.-968G>T ; . ; . ; . ; . ;	upstream_gene_variant ; disA ; c.-2348G>T ; . ; . ; . ; . ;	upstream_gene_variant ; yacL ; c.-3546G>T ; . ; . ; . ; . ;	upstream_gene_variant ; ispD ; c.-4661G>T ; . ; . ; . ; . ;
NC_000964.3	105152	A	G	225	hom	240	240	clpC	gene-BSU_00860	103572	106004	+	synonymous_variant ; clpC ; c.1581A>G ; p.Ala527Ala ; 1581/2433 ; 1581/2433 ; 527/810 ;	synonymous_variant ; clpC ; c.1581A>G ; p.Ala527Ala ; 1581/2433 ; 1581/2433 ; 527/810 ;	upstream_gene_variant ; radA ; c.-944A>G ; . ; . ; . ; . ;	upstream_gene_variant ; disA ; c.-2324A>G ; . ; . ; . ; . ;	upstream_gene_variant ; yacL ; c.-3522A>G ; . ; . ; . ; . ;	upstream_gene_variant ; ispD ; c.-4637A>G ; . ; . ; . ; . ;
NC_000964.3	105230	A	G	225	hom	183	183	clpC	gene-BSU_00860	103572	106004	+	synonymous_variant ; clpC ; c.1659A>G ; p.Glu553Glu ; 1659/2433 ; 1659/2433 ; 553/810 ;	synonymous_variant ; clpC ; c.1659A>G ; p.Glu553Glu ; 1659/2433 ; 1659/2433 ; 553/810 ;	upstream_gene_variant ; radA ; c.-866A>G ; . ; . ; . ; . ;	upstream_gene_variant ; disA ; c.-2246A>G ; . ; . ; . ; . ;	upstream_gene_variant ; yacL ; c.-3444A>G ; . ; . ; . ; . ;	upstream_gene_variant ; ispD ; c.-4559A>G ; . ; . ; . ; . ;
NC_000964.3	105314	T	C	225	hom	210	210	clpC	gene-BSU_00860	103572	106004	+	synonymous_variant ; clpC ; c.1743T>C ; p.His581His ; 1743/2433 ; 1743/2433 ; 581/810 ;	synonymous_variant ; clpC ; c.1743T>C ; p.His581His ; 1743/2433 ; 1743/2433 ; 581/810 ;	upstream_gene_variant ; radA ; c.-782T>C ; . ; . ; . ; . ;	upstream_gene_variant ; disA ; c.-2162T>C ; . ; . ; . ; . ;	upstream_gene_variant ; yacL ; c.-3360T>C ; . ; . ; . ; . ;	upstream_gene_variant ; ispD ; c.-4475T>C ; . ; . ; . ; . ;
NC_000964.3	105344	G	A	225	hom	233	233	clpC	gene-BSU_00860	103572	106004	+	synonymous_variant ; clpC ; c.1773G>A ; p.Pro591Pro ; 1773/2433 ; 1773/2433 ; 591/810 ;	synonymous_variant ; clpC ; c.1773G>A ; p.Pro591Pro ; 1773/2433 ; 1773/2433 ; 591/810 ;	upstream_gene_variant ; radA ; c.-752G>A ; . ; . ; . ; . ;	upstream_gene_variant ; disA ; c.-2132G>A ; . ; . ; . ; . ;	upstream_gene_variant ; yacL ; c.-3330G>A ; . ; . ; . ; . ;	upstream_gene_variant ; ispD ; c.-4445G>A ; . ; . ; . ; . ;
NC_000964.3	105347	T	A	225	hom	234	234	clpC	gene-BSU_00860	103572	106004	+	synonymous_variant ; clpC ; c.1776T>A ; p.Gly592Gly ; 1776/2433 ; 1776/2433 ; 592/810 ;	synonymous_variant ; clpC ; c.1776T>A ; p.Gly592Gly ; 1776/2433 ; 1776/2433 ; 592/810 ;	upstream_gene_variant ; radA ; c.-749T>A ; . ; . ; . ; . ;	upstream_gene_variant ; disA ; c.-2129T>A ; . ; . ; . ; . ;	upstream_gene_variant ; yacL ; c.-3327T>A ; . ; . ; . ; . ;	upstream_gene_variant ; ispD ; c.-4442T>A ; . ; . ; . ; . ;
NC_000964.3	105437	G	A	225	hom	217	217	clpC	gene-BSU_00860	103572	106004	+	synonymous_variant ; clpC ; c.1866G>A ; p.Ala622Ala ; 1866/2433 ; 1866/2433 ; 622/810 ;	synonymous_variant ; clpC ; c.1866G>A ; p.Ala622Ala ; 1866/2433 ; 1866/2433 ; 622/810 ;	upstream_gene_variant ; radA ; c.-659G>A ; . ; . ; . ; . ;	upstream_gene_variant ; disA ; c.-2039G>A ; . ; . ; . ; . ;	upstream_gene_variant ; yacL ; c.-3237G>A ; . ; . ; . ; . ;	upstream_gene_variant ; ispD ; c.-4352G>A ; . ; . ; . ; . ;
NC_000964.3	105566	A	G	225	hom	216	216	clpC	gene-BSU_00860	103572	106004	+	synonymous_variant ; clpC ; c.1995A>G ; p.Leu665Leu ; 1995/2433 ; 1995/2433 ; 665/810 ;	synonymous_variant ; clpC ; c.1995A>G ; p.Leu665Leu ; 1995/2433 ; 1995/2433 ; 665/810 ;	upstream_gene_variant ; radA ; c.-530A>G ; . ; . ; . ; . ;	upstream_gene_variant ; disA ; c.-1910A>G ; . ; . ; . ; . ;	upstream_gene_variant ; yacL ; c.-3108A>G ; . ; . ; . ; . ;	upstream_gene_variant ; ispD ; c.-4223A>G ; . ; . ; . ; . ;
NC_000964.3	105650	A	G	225	hom	213	213	clpC	gene-BSU_00860	103572	106004	+	synonymous_variant ; clpC ; c.2079A>G ; p.Leu693Leu ; 2079/2433 ; 2079/2433 ; 693/810 ;	synonymous_variant ; clpC ; c.2079A>G ; p.Leu693Leu ; 2079/2433 ; 2079/2433 ; 693/810 ;	upstream_gene_variant ; radA ; c.-446A>G ; . ; . ; . ; . ;	upstream_gene_variant ; disA ; c.-1826A>G ; . ; . ; . ; . ;	upstream_gene_variant ; yacL ; c.-3024A>G ; . ; . ; . ; . ;	upstream_gene_variant ; ispD ; c.-4139A>G ; . ; . ; . ; . ;
NC_000964.3	105728	C	T	225	hom	222	222	clpC	gene-BSU_00860	103572	106004	+	synonymous_variant ; clpC ; c.2157C>T ; p.Leu719Leu ; 2157/2433 ; 2157/2433 ; 719/810 ;	synonymous_variant ; clpC ; c.2157C>T ; p.Leu719Leu ; 2157/2433 ; 2157/2433 ; 719/810 ;	upstream_gene_variant ; radA ; c.-368C>T ; . ; . ; . ; . ;	upstream_gene_variant ; disA ; c.-1748C>T ; . ; . ; . ; . ;	upstream_gene_variant ; yacL ; c.-2946C>T ; . ; . ; . ; . ;	upstream_gene_variant ; ispD ; c.-4061C>T ; . ; . ; . ; . ;
NC_000964.3	105734	G	A	225	hom	217	217	clpC	gene-BSU_00860	103572	106004	+	synonymous_variant ; clpC ; c.2163G>A ; p.Glu721Glu ; 2163/2433 ; 2163/2433 ; 721/810 ;	synonymous_variant ; clpC ; c.2163G>A ; p.Glu721Glu ; 2163/2433 ; 2163/2433 ; 721/810 ;	upstream_gene_variant ; radA ; c.-362G>A ; . ; . ; . ; . ;	upstream_gene_variant ; disA ; c.-1742G>A ; . ; . ; . ; . ;	upstream_gene_variant ; yacL ; c.-2940G>A ; . ; . ; . ; . ;	upstream_gene_variant ; ispD ; c.-4055G>A ; . ; . ; . ; . ;
NC_000964.3	105809	T	A	228	hom	287	286	clpC	gene-BSU_00860	103572	106004	+	synonymous_variant ; clpC ; c.2238T>A ; p.Ala746Ala ; 2238/2433 ; 2238/2433 ; 746/810 ;	synonymous_variant ; clpC ; c.2238T>A ; p.Ala746Ala ; 2238/2433 ; 2238/2433 ; 746/810 ;	upstream_gene_variant ; radA ; c.-287T>A ; . ; . ; . ; . ;	upstream_gene_variant ; disA ; c.-1667T>A ; . ; . ; . ; . ;	upstream_gene_variant ; yacL ; c.-2865T>A ; . ; . ; . ; . ;	upstream_gene_variant ; ispD ; c.-3980T>A ; . ; . ; . ; . ;
NC_000964.3	106116	G	A	225	hom	269	269	radA	gene-BSU_00870	106096	107472	+	synonymous_variant ; radA ; c.21G>A ; p.Lys7Lys ; 21/1377 ; 21/1377 ; 7/458 ;	synonymous_variant ; radA ; c.21G>A ; p.Lys7Lys ; 21/1377 ; 21/1377 ; 7/458 ;	upstream_gene_variant ; disA ; c.-1360G>A ; . ; . ; . ; . ;	upstream_gene_variant ; yacL ; c.-2558G>A ; . ; . ; . ; . ;	upstream_gene_variant ; ispD ; c.-3673G>A ; . ; . ; . ; . ;	upstream_gene_variant ; ispF ; c.-4364G>A ; . ; . ; . ; . ;
NC_000964.3	106176	T	C	225	hom	240	240	radA	gene-BSU_00870	106096	107472	+	synonymous_variant ; radA ; c.81T>C ; p.Cys27Cys ; 81/1377 ; 81/1377 ; 27/458 ;	synonymous_variant ; radA ; c.81T>C ; p.Cys27Cys ; 81/1377 ; 81/1377 ; 27/458 ;	upstream_gene_variant ; disA ; c.-1300T>C ; . ; . ; . ; . ;	upstream_gene_variant ; yacL ; c.-2498T>C ; . ; . ; . ; . ;	upstream_gene_variant ; ispD ; c.-3613T>C ; . ; . ; . ; . ;	upstream_gene_variant ; ispF ; c.-4304T>C ; . ; . ; . ; . ;
NC_000964.3	106482	A	G	225	hom	185	185	radA	gene-BSU_00870	106096	107472	+	synonymous_variant ; radA ; c.387A>G ; p.Glu129Glu ; 387/1377 ; 387/1377 ; 129/458 ;	synonymous_variant ; radA ; c.387A>G ; p.Glu129Glu ; 387/1377 ; 387/1377 ; 129/458 ;	upstream_gene_variant ; disA ; c.-994A>G ; . ; . ; . ; . ;	upstream_gene_variant ; yacL ; c.-2192A>G ; . ; . ; . ; . ;	upstream_gene_variant ; ispD ; c.-3307A>G ; . ; . ; . ; . ;	upstream_gene_variant ; ispF ; c.-3998A>G ; . ; . ; . ; . ;
NC_000964.3	106600	T	G	225	hom	217	217	radA	gene-BSU_00870	106096	107472	+	missense_variant ; radA ; c.505T>G ; p.Ser169Ala ; 505/1377 ; 505/1377 ; 169/458 ;	missense_variant ; radA ; c.505T>G ; p.Ser169Ala ; 505/1377 ; 505/1377 ; 169/458 ;	upstream_gene_variant ; disA ; c.-876T>G ; . ; . ; . ; . ;	upstream_gene_variant ; yacL ; c.-2074T>G ; . ; . ; . ; . ;	upstream_gene_variant ; ispD ; c.-3189T>G ; . ; . ; . ; . ;	upstream_gene_variant ; ispF ; c.-3880T>G ; . ; . ; . ; . ;
NC_000964.3	106653	T	G	225	hom	189	189	radA	gene-BSU_00870	106096	107472	+	synonymous_variant ; radA ; c.558T>G ; p.Ser186Ser ; 558/1377 ; 558/1377 ; 186/458 ;	synonymous_variant ; radA ; c.558T>G ; p.Ser186Ser ; 558/1377 ; 558/1377 ; 186/458 ;	upstream_gene_variant ; disA ; c.-823T>G ; . ; . ; . ; . ;	upstream_gene_variant ; yacL ; c.-2021T>G ; . ; . ; . ; . ;	upstream_gene_variant ; ispD ; c.-3136T>G ; . ; . ; . ; . ;	upstream_gene_variant ; ispF ; c.-3827T>G ; . ; . ; . ; . ;
NC_000964.3	106668	G	A	225	hom	186	186	radA	gene-BSU_00870	106096	107472	+	synonymous_variant ; radA ; c.573G>A ; p.Val191Val ; 573/1377 ; 573/1377 ; 191/458 ;	synonymous_variant ; radA ; c.573G>A ; p.Val191Val ; 573/1377 ; 573/1377 ; 191/458 ;	upstream_gene_variant ; disA ; c.-808G>A ; . ; . ; . ; . ;	upstream_gene_variant ; yacL ; c.-2006G>A ; . ; . ; . ; . ;	upstream_gene_variant ; ispD ; c.-3121G>A ; . ; . ; . ; . ;	upstream_gene_variant ; ispF ; c.-3812G>A ; . ; . ; . ; . ;
NC_000964.3	106849	C	A	225	hom	86	86	radA	gene-BSU_00870	106096	107472	+	synonymous_variant ; radA ; c.754C>A ; p.Arg252Arg ; 754/1377 ; 754/1377 ; 252/458 ;	synonymous_variant ; radA ; c.754C>A ; p.Arg252Arg ; 754/1377 ; 754/1377 ; 252/458 ;	upstream_gene_variant ; disA ; c.-627C>A ; . ; . ; . ; . ;	upstream_gene_variant ; yacL ; c.-1825C>A ; . ; . ; . ; . ;	upstream_gene_variant ; ispD ; c.-2940C>A ; . ; . ; . ; . ;	upstream_gene_variant ; ispF ; c.-3631C>A ; . ; . ; . ; . ;
NC_000964.3	107034	A	G	225	hom	168	168	radA	gene-BSU_00870	106096	107472	+	synonymous_variant ; radA ; c.939A>G ; p.Ala313Ala ; 939/1377 ; 939/1377 ; 313/458 ;	synonymous_variant ; radA ; c.939A>G ; p.Ala313Ala ; 939/1377 ; 939/1377 ; 313/458 ;	upstream_gene_variant ; disA ; c.-442A>G ; . ; . ; . ; . ;	upstream_gene_variant ; yacL ; c.-1640A>G ; . ; . ; . ; . ;	upstream_gene_variant ; ispD ; c.-2755A>G ; . ; . ; . ; . ;	upstream_gene_variant ; ispF ; c.-3446A>G ; . ; . ; . ; . ;
NC_000964.3	107052	T	C	225	hom	182	182	radA	gene-BSU_00870	106096	107472	+	synonymous_variant ; radA ; c.957T>C ; p.Ser319Ser ; 957/1377 ; 957/1377 ; 319/458 ;	synonymous_variant ; radA ; c.957T>C ; p.Ser319Ser ; 957/1377 ; 957/1377 ; 319/458 ;	upstream_gene_variant ; disA ; c.-424T>C ; . ; . ; . ; . ;	upstream_gene_variant ; yacL ; c.-1622T>C ; . ; . ; . ; . ;	upstream_gene_variant ; ispD ; c.-2737T>C ; . ; . ; . ; . ;	upstream_gene_variant ; ispF ; c.-3428T>C ; . ; . ; . ; . ;
NC_000964.3	107137	C	T	225	hom	207	207	radA	gene-BSU_00870	106096	107472	+	synonymous_variant ; radA ; c.1042C>T ; p.Leu348Leu ; 1042/1377 ; 1042/1377 ; 348/458 ;	synonymous_variant ; radA ; c.1042C>T ; p.Leu348Leu ; 1042/1377 ; 1042/1377 ; 348/458 ;	upstream_gene_variant ; disA ; c.-339C>T ; . ; . ; . ; . ;	upstream_gene_variant ; yacL ; c.-1537C>T ; . ; . ; . ; . ;	upstream_gene_variant ; ispD ; c.-2652C>T ; . ; . ; . ; . ;	upstream_gene_variant ; ispF ; c.-3343C>T ; . ; . ; . ; . ;
NC_000964.3	107214	G	C	225	hom	229	229	radA	gene-BSU_00870	106096	107472	+	synonymous_variant ; radA ; c.1119G>C ; p.Ala373Ala ; 1119/1377 ; 1119/1377 ; 373/458 ;	synonymous_variant ; radA ; c.1119G>C ; p.Ala373Ala ; 1119/1377 ; 1119/1377 ; 373/458 ;	upstream_gene_variant ; disA ; c.-262G>C ; . ; . ; . ; . ;	upstream_gene_variant ; yacL ; c.-1460G>C ; . ; . ; . ; . ;	upstream_gene_variant ; ispD ; c.-2575G>C ; . ; . ; . ; . ;	upstream_gene_variant ; ispF ; c.-3266G>C ; . ; . ; . ; . ;
NC_000964.3	107229	T	C	225	hom	232	232	radA	gene-BSU_00870	106096	107472	+	synonymous_variant ; radA ; c.1134T>C ; p.Ile378Ile ; 1134/1377 ; 1134/1377 ; 378/458 ;	synonymous_variant ; radA ; c.1134T>C ; p.Ile378Ile ; 1134/1377 ; 1134/1377 ; 378/458 ;	upstream_gene_variant ; disA ; c.-247T>C ; . ; . ; . ; . ;	upstream_gene_variant ; yacL ; c.-1445T>C ; . ; . ; . ; . ;	upstream_gene_variant ; ispD ; c.-2560T>C ; . ; . ; . ; . ;	upstream_gene_variant ; ispF ; c.-3251T>C ; . ; . ; . ; . ;
NC_000964.3	107271	T	C	225	hom	230	230	radA	gene-BSU_00870	106096	107472	+	synonymous_variant ; radA ; c.1176T>C ; p.Cys392Cys ; 1176/1377 ; 1176/1377 ; 392/458 ;	synonymous_variant ; radA ; c.1176T>C ; p.Cys392Cys ; 1176/1377 ; 1176/1377 ; 392/458 ;	upstream_gene_variant ; disA ; c.-205T>C ; . ; . ; . ; . ;	upstream_gene_variant ; yacL ; c.-1403T>C ; . ; . ; . ; . ;	upstream_gene_variant ; ispD ; c.-2518T>C ; . ; . ; . ; . ;	upstream_gene_variant ; ispF ; c.-3209T>C ; . ; . ; . ; . ;
NC_000964.3	107355	T	C	225	hom	259	259	radA	gene-BSU_00870	106096	107472	+	synonymous_variant ; radA ; c.1260T>C ; p.Gly420Gly ; 1260/1377 ; 1260/1377 ; 420/458 ;	synonymous_variant ; radA ; c.1260T>C ; p.Gly420Gly ; 1260/1377 ; 1260/1377 ; 420/458 ;	upstream_gene_variant ; disA ; c.-121T>C ; . ; . ; . ; . ;	upstream_gene_variant ; yacL ; c.-1319T>C ; . ; . ; . ; . ;	upstream_gene_variant ; ispD ; c.-2434T>C ; . ; . ; . ; . ;	upstream_gene_variant ; ispF ; c.-3125T>C ; . ; . ; . ; . ;
NC_000964.3	107505	C	T	225	hom	278	278	disA	gene-BSU_00880	107476	108558	+	synonymous_variant ; disA ; c.30C>T ; p.His10His ; 30/1083 ; 30/1083 ; 10/360 ;	synonymous_variant ; disA ; c.30C>T ; p.His10His ; 30/1083 ; 30/1083 ; 10/360 ;	upstream_gene_variant ; yacL ; c.-1169C>T ; . ; . ; . ; . ;	upstream_gene_variant ; ispD ; c.-2284C>T ; . ; . ; . ; . ;	upstream_gene_variant ; ispF ; c.-2975C>T ; . ; . ; . ; . ;	upstream_gene_variant ; gltX ; c.-3542C>T ; . ; . ; . ; . ;
NC_000964.3	107692	C	T	225	hom	133	133	disA	gene-BSU_00880	107476	108558	+	synonymous_variant ; disA ; c.217C>T ; p.Leu73Leu ; 217/1083 ; 217/1083 ; 73/360 ;	synonymous_variant ; disA ; c.217C>T ; p.Leu73Leu ; 217/1083 ; 217/1083 ; 73/360 ;	upstream_gene_variant ; yacL ; c.-982C>T ; . ; . ; . ; . ;	upstream_gene_variant ; ispD ; c.-2097C>T ; . ; . ; . ; . ;	upstream_gene_variant ; ispF ; c.-2788C>T ; . ; . ; . ; . ;	upstream_gene_variant ; gltX ; c.-3355C>T ; . ; . ; . ; . ;
NC_000964.3	107730	T	G	225	hom	131	131	disA	gene-BSU_00880	107476	108558	+	synonymous_variant ; disA ; c.255T>G ; p.Ser85Ser ; 255/1083 ; 255/1083 ; 85/360 ;	synonymous_variant ; disA ; c.255T>G ; p.Ser85Ser ; 255/1083 ; 255/1083 ; 85/360 ;	upstream_gene_variant ; yacL ; c.-944T>G ; . ; . ; . ; . ;	upstream_gene_variant ; ispD ; c.-2059T>G ; . ; . ; . ; . ;	upstream_gene_variant ; ispF ; c.-2750T>G ; . ; . ; . ; . ;	upstream_gene_variant ; gltX ; c.-3317T>G ; . ; . ; . ; . ;
NC_000964.3	107739	G	A	225	hom	137	137	disA	gene-BSU_00880	107476	108558	+	synonymous_variant ; disA ; c.264G>A ; p.Lys88Lys ; 264/1083 ; 264/1083 ; 88/360 ;	synonymous_variant ; disA ; c.264G>A ; p.Lys88Lys ; 264/1083 ; 264/1083 ; 88/360 ;	upstream_gene_variant ; yacL ; c.-935G>A ; . ; . ; . ; . ;	upstream_gene_variant ; ispD ; c.-2050G>A ; . ; . ; . ; . ;	upstream_gene_variant ; ispF ; c.-2741G>A ; . ; . ; . ; . ;	upstream_gene_variant ; gltX ; c.-3308G>A ; . ; . ; . ; . ;
NC_000964.3	107745	A	C	225	hom	146	146	disA	gene-BSU_00880	107476	108558	+	synonymous_variant ; disA ; c.270A>C ; p.Leu90Leu ; 270/1083 ; 270/1083 ; 90/360 ;	synonymous_variant ; disA ; c.270A>C ; p.Leu90Leu ; 270/1083 ; 270/1083 ; 90/360 ;	upstream_gene_variant ; yacL ; c.-929A>C ; . ; . ; . ; . ;	upstream_gene_variant ; ispD ; c.-2044A>C ; . ; . ; . ; . ;	upstream_gene_variant ; ispF ; c.-2735A>C ; . ; . ; . ; . ;	upstream_gene_variant ; gltX ; c.-3302A>C ; . ; . ; . ; . ;
NC_000964.3	107811	A	G	225	hom	178	178	disA	gene-BSU_00880	107476	108558	+	synonymous_variant ; disA ; c.336A>G ; p.Arg112Arg ; 336/1083 ; 336/1083 ; 112/360 ;	synonymous_variant ; disA ; c.336A>G ; p.Arg112Arg ; 336/1083 ; 336/1083 ; 112/360 ;	upstream_gene_variant ; yacL ; c.-863A>G ; . ; . ; . ; . ;	upstream_gene_variant ; ispD ; c.-1978A>G ; . ; . ; . ; . ;	upstream_gene_variant ; ispF ; c.-2669A>G ; . ; . ; . ; . ;	upstream_gene_variant ; gltX ; c.-3236A>G ; . ; . ; . ; . ;
NC_000964.3	107856	C	T	225	hom	197	197	disA	gene-BSU_00880	107476	108558	+	synonymous_variant ; disA ; c.381C>T ; p.Ala127Ala ; 381/1083 ; 381/1083 ; 127/360 ;	synonymous_variant ; disA ; c.381C>T ; p.Ala127Ala ; 381/1083 ; 381/1083 ; 127/360 ;	upstream_gene_variant ; yacL ; c.-818C>T ; . ; . ; . ; . ;	upstream_gene_variant ; ispD ; c.-1933C>T ; . ; . ; . ; . ;	upstream_gene_variant ; ispF ; c.-2624C>T ; . ; . ; . ; . ;	upstream_gene_variant ; gltX ; c.-3191C>T ; . ; . ; . ; . ;
NC_000964.3	108039	C	T	225	hom	255	255	disA	gene-BSU_00880	107476	108558	+	synonymous_variant ; disA ; c.564C>T ; p.Phe188Phe ; 564/1083 ; 564/1083 ; 188/360 ;	synonymous_variant ; disA ; c.564C>T ; p.Phe188Phe ; 564/1083 ; 564/1083 ; 188/360 ;	upstream_gene_variant ; yacL ; c.-635C>T ; . ; . ; . ; . ;	upstream_gene_variant ; ispD ; c.-1750C>T ; . ; . ; . ; . ;	upstream_gene_variant ; ispF ; c.-2441C>T ; . ; . ; . ; . ;	upstream_gene_variant ; gltX ; c.-3008C>T ; . ; . ; . ; . ;
NC_000964.3	108123	G	A	225	hom	270	270	disA	gene-BSU_00880	107476	108558	+	synonymous_variant ; disA ; c.648G>A ; p.Gly216Gly ; 648/1083 ; 648/1083 ; 216/360 ;	synonymous_variant ; disA ; c.648G>A ; p.Gly216Gly ; 648/1083 ; 648/1083 ; 216/360 ;	upstream_gene_variant ; yacL ; c.-551G>A ; . ; . ; . ; . ;	upstream_gene_variant ; ispD ; c.-1666G>A ; . ; . ; . ; . ;	upstream_gene_variant ; ispF ; c.-2357G>A ; . ; . ; . ; . ;	upstream_gene_variant ; gltX ; c.-2924G>A ; . ; . ; . ; . ;
NC_000964.3	108429	G	A	225	hom	257	257	disA	gene-BSU_00880	107476	108558	+	synonymous_variant ; disA ; c.954G>A ; p.Leu318Leu ; 954/1083 ; 954/1083 ; 318/360 ;	synonymous_variant ; disA ; c.954G>A ; p.Leu318Leu ; 954/1083 ; 954/1083 ; 318/360 ;	upstream_gene_variant ; yacL ; c.-245G>A ; . ; . ; . ; . ;	upstream_gene_variant ; ispD ; c.-1360G>A ; . ; . ; . ; . ;	upstream_gene_variant ; ispF ; c.-2051G>A ; . ; . ; . ; . ;	upstream_gene_variant ; gltX ; c.-2618G>A ; . ; . ; . ; . ;
NC_000964.3	108577	G	A	225	hom	143	143	.	.	.	.	.	.	upstream_gene_variant ; yacL ; c.-97G>A ; . ; . ; . ; . ;	upstream_gene_variant ; ispD ; c.-1212G>A ; . ; . ; . ; . ;	upstream_gene_variant ; ispF ; c.-1903G>A ; . ; . ; . ; . ;	upstream_gene_variant ; gltX ; c.-2470G>A ; . ; . ; . ; . ;	upstream_gene_variant ; cysE ; c.-4223G>A ; . ; . ; . ; . ;
NC_000964.3	109054	C	G	225	hom	83	83	yacL	gene-BSU_00890	108674	109774	+	synonymous_variant ; yacL ; c.381C>G ; p.Leu127Leu ; 381/1101 ; 381/1101 ; 127/366 ;	synonymous_variant ; yacL ; c.381C>G ; p.Leu127Leu ; 381/1101 ; 381/1101 ; 127/366 ;	upstream_gene_variant ; ispD ; c.-735C>G ; . ; . ; . ; . ;	upstream_gene_variant ; ispF ; c.-1426C>G ; . ; . ; . ; . ;	upstream_gene_variant ; gltX ; c.-1993C>G ; . ; . ; . ; . ;	upstream_gene_variant ; cysE ; c.-3746C>G ; . ; . ; . ; . ;
NC_000964.3	109300	T	A	225	hom	133	133	yacL	gene-BSU_00890	108674	109774	+	synonymous_variant ; yacL ; c.627T>A ; p.Ser209Ser ; 627/1101 ; 627/1101 ; 209/366 ;	synonymous_variant ; yacL ; c.627T>A ; p.Ser209Ser ; 627/1101 ; 627/1101 ; 209/366 ;	upstream_gene_variant ; ispD ; c.-489T>A ; . ; . ; . ; . ;	upstream_gene_variant ; ispF ; c.-1180T>A ; . ; . ; . ; . ;	upstream_gene_variant ; gltX ; c.-1747T>A ; . ; . ; . ; . ;	upstream_gene_variant ; cysE ; c.-3500T>A ; . ; . ; . ; . ;
NC_000964.3	109549	T	C	225	hom	281	281	yacL	gene-BSU_00890	108674	109774	+	synonymous_variant ; yacL ; c.876T>C ; p.Val292Val ; 876/1101 ; 876/1101 ; 292/366 ;	synonymous_variant ; yacL ; c.876T>C ; p.Val292Val ; 876/1101 ; 876/1101 ; 292/366 ;	upstream_gene_variant ; ispD ; c.-240T>C ; . ; . ; . ; . ;	upstream_gene_variant ; ispF ; c.-931T>C ; . ; . ; . ; . ;	upstream_gene_variant ; gltX ; c.-1498T>C ; . ; . ; . ; . ;	upstream_gene_variant ; cysE ; c.-3251T>C ; . ; . ; . ; . ;
NC_000964.3	109872	G	A	225	hom	357	357	ispD	gene-BSU_00900	109789	110487	+	synonymous_variant ; ispD ; c.84G>A ; p.Lys28Lys ; 84/699 ; 84/699 ; 28/232 ;	synonymous_variant ; ispD ; c.84G>A ; p.Lys28Lys ; 84/699 ; 84/699 ; 28/232 ;	upstream_gene_variant ; ispF ; c.-608G>A ; . ; . ; . ; . ;	upstream_gene_variant ; gltX ; c.-1175G>A ; . ; . ; . ; . ;	upstream_gene_variant ; cysE ; c.-2928G>A ; . ; . ; . ; . ;	upstream_gene_variant ; cysS ; c.-3578G>A ; . ; . ; . ; . ;
NC_000964.3	109972	C	A	225	hom	273	273	ispD	gene-BSU_00900	109789	110487	+	missense_variant ; ispD ; c.184C>A ; p.Gln62Lys ; 184/699 ; 184/699 ; 62/232 ;	missense_variant ; ispD ; c.184C>A ; p.Gln62Lys ; 184/699 ; 184/699 ; 62/232 ;	upstream_gene_variant ; ispF ; c.-508C>A ; . ; . ; . ; . ;	upstream_gene_variant ; gltX ; c.-1075C>A ; . ; . ; . ; . ;	upstream_gene_variant ; cysE ; c.-2828C>A ; . ; . ; . ; . ;	upstream_gene_variant ; cysS ; c.-3478C>A ; . ; . ; . ; . ;
NC_000964.3	109973	A	G	225	hom	273	273	ispD	gene-BSU_00900	109789	110487	+	missense_variant ; ispD ; c.185A>G ; p.Gln62Arg ; 185/699 ; 185/699 ; 62/232 ;	missense_variant ; ispD ; c.185A>G ; p.Gln62Arg ; 185/699 ; 185/699 ; 62/232 ;	upstream_gene_variant ; ispF ; c.-507A>G ; . ; . ; . ; . ;	upstream_gene_variant ; gltX ; c.-1074A>G ; . ; . ; . ; . ;	upstream_gene_variant ; cysE ; c.-2827A>G ; . ; . ; . ; . ;	upstream_gene_variant ; cysS ; c.-3477A>G ; . ; . ; . ; . ;
NC_000964.3	109977	A	C	225	hom	273	273	ispD	gene-BSU_00900	109789	110487	+	missense_variant ; ispD ; c.189A>C ; p.Gln63His ; 189/699 ; 189/699 ; 63/232 ;	missense_variant ; ispD ; c.189A>C ; p.Gln63His ; 189/699 ; 189/699 ; 63/232 ;	upstream_gene_variant ; ispF ; c.-503A>C ; . ; . ; . ; . ;	upstream_gene_variant ; gltX ; c.-1070A>C ; . ; . ; . ; . ;	upstream_gene_variant ; cysE ; c.-2823A>C ; . ; . ; . ; . ;	upstream_gene_variant ; cysS ; c.-3473A>C ; . ; . ; . ; . ;
NC_000964.3	109998	T	C	228	hom	286	285	ispD	gene-BSU_00900	109789	110487	+	synonymous_variant ; ispD ; c.210T>C ; p.Phe70Phe ; 210/699 ; 210/699 ; 70/232 ;	synonymous_variant ; ispD ; c.210T>C ; p.Phe70Phe ; 210/699 ; 210/699 ; 70/232 ;	upstream_gene_variant ; ispF ; c.-482T>C ; . ; . ; . ; . ;	upstream_gene_variant ; gltX ; c.-1049T>C ; . ; . ; . ; . ;	upstream_gene_variant ; cysE ; c.-2802T>C ; . ; . ; . ; . ;	upstream_gene_variant ; cysS ; c.-3452T>C ; . ; . ; . ; . ;
NC_000964.3	110031	T	A	225	hom	289	289	ispD	gene-BSU_00900	109789	110487	+	missense_variant ; ispD ; c.243T>A ; p.Asp81Glu ; 243/699 ; 243/699 ; 81/232 ;	missense_variant ; ispD ; c.243T>A ; p.Asp81Glu ; 243/699 ; 243/699 ; 81/232 ;	upstream_gene_variant ; ispF ; c.-449T>A ; . ; . ; . ; . ;	upstream_gene_variant ; gltX ; c.-1016T>A ; . ; . ; . ; . ;	upstream_gene_variant ; cysE ; c.-2769T>A ; . ; . ; . ; . ;	upstream_gene_variant ; cysS ; c.-3419T>A ; . ; . ; . ; . ;
NC_000964.3	110037	A	T	225	hom	280	280	ispD	gene-BSU_00900	109789	110487	+	synonymous_variant ; ispD ; c.249A>T ; p.Arg83Arg ; 249/699 ; 249/699 ; 83/232 ;	synonymous_variant ; ispD ; c.249A>T ; p.Arg83Arg ; 249/699 ; 249/699 ; 83/232 ;	upstream_gene_variant ; ispF ; c.-443A>T ; . ; . ; . ; . ;	upstream_gene_variant ; gltX ; c.-1010A>T ; . ; . ; . ; . ;	upstream_gene_variant ; cysE ; c.-2763A>T ; . ; . ; . ; . ;	upstream_gene_variant ; cysS ; c.-3413A>T ; . ; . ; . ; . ;
NC_000964.3	110109	T	C	225	hom	252	252	ispD	gene-BSU_00900	109789	110487	+	synonymous_variant ; ispD ; c.321T>C ; p.Arg107Arg ; 321/699 ; 321/699 ; 107/232 ;	synonymous_variant ; ispD ; c.321T>C ; p.Arg107Arg ; 321/699 ; 321/699 ; 107/232 ;	upstream_gene_variant ; ispF ; c.-371T>C ; . ; . ; . ; . ;	upstream_gene_variant ; gltX ; c.-938T>C ; . ; . ; . ; . ;	upstream_gene_variant ; cysE ; c.-2691T>C ; . ; . ; . ; . ;	upstream_gene_variant ; cysS ; c.-3341T>C ; . ; . ; . ; . ;
NC_000964.3	110126	A	T	225	hom	262	262	ispD	gene-BSU_00900	109789	110487	+	missense_variant ; ispD ; c.338A>T ; p.Glu113Val ; 338/699 ; 338/699 ; 113/232 ;	missense_variant ; ispD ; c.338A>T ; p.Glu113Val ; 338/699 ; 338/699 ; 113/232 ;	upstream_gene_variant ; ispF ; c.-354A>T ; . ; . ; . ; . ;	upstream_gene_variant ; gltX ; c.-921A>T ; . ; . ; . ; . ;	upstream_gene_variant ; cysE ; c.-2674A>T ; . ; . ; . ; . ;	upstream_gene_variant ; cysS ; c.-3324A>T ; . ; . ; . ; . ;
NC_000964.3	110382	C	A	225	hom	237	237	ispD	gene-BSU_00900	109789	110487	+	synonymous_variant ; ispD ; c.594C>A ; p.Val198Val ; 594/699 ; 594/699 ; 198/232 ;	synonymous_variant ; ispD ; c.594C>A ; p.Val198Val ; 594/699 ; 594/699 ; 198/232 ;	upstream_gene_variant ; ispF ; c.-98C>A ; . ; . ; . ; . ;	upstream_gene_variant ; gltX ; c.-665C>A ; . ; . ; . ; . ;	upstream_gene_variant ; cysE ; c.-2418C>A ; . ; . ; . ; . ;	upstream_gene_variant ; cysS ; c.-3068C>A ; . ; . ; . ; . ;
NC_000964.3	110603	T	C	225	hom	284	284	ispF	gene-BSU_00910	110480	110956	+	synonymous_variant ; ispF ; c.124T>C ; p.Leu42Leu ; 124/477 ; 124/477 ; 42/158 ;	synonymous_variant ; ispF ; c.124T>C ; p.Leu42Leu ; 124/477 ; 124/477 ; 42/158 ;	upstream_gene_variant ; gltX ; c.-444T>C ; . ; . ; . ; . ;	upstream_gene_variant ; cysE ; c.-2197T>C ; . ; . ; . ; . ;	upstream_gene_variant ; cysS ; c.-2847T>C ; . ; . ; . ; . ;	upstream_gene_variant ; mrnC ; c.-4251T>C ; . ; . ; . ; . ;
NC_000964.3	110611	C	T	225	hom	285	285	ispF	gene-BSU_00910	110480	110956	+	synonymous_variant ; ispF ; c.132C>T ; p.Thr44Thr ; 132/477 ; 132/477 ; 44/158 ;	synonymous_variant ; ispF ; c.132C>T ; p.Thr44Thr ; 132/477 ; 132/477 ; 44/158 ;	upstream_gene_variant ; gltX ; c.-436C>T ; . ; . ; . ; . ;	upstream_gene_variant ; cysE ; c.-2189C>T ; . ; . ; . ; . ;	upstream_gene_variant ; cysS ; c.-2839C>T ; . ; . ; . ; . ;	upstream_gene_variant ; mrnC ; c.-4243C>T ; . ; . ; . ; . ;
NC_000964.3	110653	A	C	225	hom	252	252	ispF	gene-BSU_00910	110480	110956	+	synonymous_variant ; ispF ; c.174A>C ; p.Ile58Ile ; 174/477 ; 174/477 ; 58/158 ;	synonymous_variant ; ispF ; c.174A>C ; p.Ile58Ile ; 174/477 ; 174/477 ; 58/158 ;	upstream_gene_variant ; gltX ; c.-394A>C ; . ; . ; . ; . ;	upstream_gene_variant ; cysE ; c.-2147A>C ; . ; . ; . ; . ;	upstream_gene_variant ; cysS ; c.-2797A>C ; . ; . ; . ; . ;	upstream_gene_variant ; mrnC ; c.-4201A>C ; . ; . ; . ; . ;
NC_000964.3	110878	A	T	225	hom	233	233	ispF	gene-BSU_00910	110480	110956	+	synonymous_variant ; ispF ; c.399A>T ; p.Thr133Thr ; 399/477 ; 399/477 ; 133/158 ;	synonymous_variant ; ispF ; c.399A>T ; p.Thr133Thr ; 399/477 ; 399/477 ; 133/158 ;	upstream_gene_variant ; gltX ; c.-169A>T ; . ; . ; . ; . ;	upstream_gene_variant ; cysE ; c.-1922A>T ; . ; . ; . ; . ;	upstream_gene_variant ; cysS ; c.-2572A>T ; . ; . ; . ; . ;	upstream_gene_variant ; mrnC ; c.-3976A>T ; . ; . ; . ; . ;
NC_000964.3	110938	A	G	225	hom	230	230	ispF	gene-BSU_00910	110480	110956	+	synonymous_variant ; ispF ; c.459A>G ; p.Val153Val ; 459/477 ; 459/477 ; 153/158 ;	synonymous_variant ; ispF ; c.459A>G ; p.Val153Val ; 459/477 ; 459/477 ; 153/158 ;	upstream_gene_variant ; gltX ; c.-109A>G ; . ; . ; . ; . ;	upstream_gene_variant ; cysE ; c.-1862A>G ; . ; . ; . ; . ;	upstream_gene_variant ; cysS ; c.-2512A>G ; . ; . ; . ; . ;	upstream_gene_variant ; mrnC ; c.-3916A>G ; . ; . ; . ; . ;
NC_000964.3	111289	T	C	225	hom	280	280	gltX	gene-BSU_00920	111047	112498	+	synonymous_variant ; gltX ; c.243T>C ; p.Gly81Gly ; 243/1452 ; 243/1452 ; 81/483 ;	synonymous_variant ; gltX ; c.243T>C ; p.Gly81Gly ; 243/1452 ; 243/1452 ; 81/483 ;	upstream_gene_variant ; cysE ; c.-1511T>C ; . ; . ; . ; . ;	upstream_gene_variant ; cysS ; c.-2161T>C ; . ; . ; . ; . ;	upstream_gene_variant ; mrnC ; c.-3565T>C ; . ; . ; . ; . ;	upstream_gene_variant ; rlmB ; c.-3980T>C ; . ; . ; . ; . ;
NC_000964.3	111490	C	T	225	hom	190	190	gltX	gene-BSU_00920	111047	112498	+	synonymous_variant ; gltX ; c.444C>T ; p.Ala148Ala ; 444/1452 ; 444/1452 ; 148/483 ;	synonymous_variant ; gltX ; c.444C>T ; p.Ala148Ala ; 444/1452 ; 444/1452 ; 148/483 ;	upstream_gene_variant ; cysE ; c.-1310C>T ; . ; . ; . ; . ;	upstream_gene_variant ; cysS ; c.-1960C>T ; . ; . ; . ; . ;	upstream_gene_variant ; mrnC ; c.-3364C>T ; . ; . ; . ; . ;	upstream_gene_variant ; rlmB ; c.-3779C>T ; . ; . ; . ; . ;
NC_000964.3	111520	T	C	225	hom	171	171	gltX	gene-BSU_00920	111047	112498	+	synonymous_variant ; gltX ; c.474T>C ; p.Arg158Arg ; 474/1452 ; 474/1452 ; 158/483 ;	synonymous_variant ; gltX ; c.474T>C ; p.Arg158Arg ; 474/1452 ; 474/1452 ; 158/483 ;	upstream_gene_variant ; cysE ; c.-1280T>C ; . ; . ; . ; . ;	upstream_gene_variant ; cysS ; c.-1930T>C ; . ; . ; . ; . ;	upstream_gene_variant ; mrnC ; c.-3334T>C ; . ; . ; . ; . ;	upstream_gene_variant ; rlmB ; c.-3749T>C ; . ; . ; . ; . ;
NC_000964.3	111536	G	A	225	hom	161	161	gltX	gene-BSU_00920	111047	112498	+	missense_variant ; gltX ; c.490G>A ; p.Val164Ile ; 490/1452 ; 490/1452 ; 164/483 ;	missense_variant ; gltX ; c.490G>A ; p.Val164Ile ; 490/1452 ; 490/1452 ; 164/483 ;	upstream_gene_variant ; cysE ; c.-1264G>A ; . ; . ; . ; . ;	upstream_gene_variant ; cysS ; c.-1914G>A ; . ; . ; . ; . ;	upstream_gene_variant ; mrnC ; c.-3318G>A ; . ; . ; . ; . ;	upstream_gene_variant ; rlmB ; c.-3733G>A ; . ; . ; . ; . ;
NC_000964.3	111550	C	T	225	hom	166	166	gltX	gene-BSU_00920	111047	112498	+	synonymous_variant ; gltX ; c.504C>T ; p.Asn168Asn ; 504/1452 ; 504/1452 ; 168/483 ;	synonymous_variant ; gltX ; c.504C>T ; p.Asn168Asn ; 504/1452 ; 504/1452 ; 168/483 ;	upstream_gene_variant ; cysE ; c.-1250C>T ; . ; . ; . ; . ;	upstream_gene_variant ; cysS ; c.-1900C>T ; . ; . ; . ; . ;	upstream_gene_variant ; mrnC ; c.-3304C>T ; . ; . ; . ; . ;	upstream_gene_variant ; rlmB ; c.-3719C>T ; . ; . ; . ; . ;
NC_000964.3	111553	C	T	225	hom	165	165	gltX	gene-BSU_00920	111047	112498	+	synonymous_variant ; gltX ; c.507C>T ; p.Asp169Asp ; 507/1452 ; 507/1452 ; 169/483 ;	synonymous_variant ; gltX ; c.507C>T ; p.Asp169Asp ; 507/1452 ; 507/1452 ; 169/483 ;	upstream_gene_variant ; cysE ; c.-1247C>T ; . ; . ; . ; . ;	upstream_gene_variant ; cysS ; c.-1897C>T ; . ; . ; . ; . ;	upstream_gene_variant ; mrnC ; c.-3301C>T ; . ; . ; . ; . ;	upstream_gene_variant ; rlmB ; c.-3716C>T ; . ; . ; . ; . ;
NC_000964.3	111601	C	T	225	hom	161	161	gltX	gene-BSU_00920	111047	112498	+	synonymous_variant ; gltX ; c.555C>T ; p.Phe185Phe ; 555/1452 ; 555/1452 ; 185/483 ;	synonymous_variant ; gltX ; c.555C>T ; p.Phe185Phe ; 555/1452 ; 555/1452 ; 185/483 ;	upstream_gene_variant ; cysE ; c.-1199C>T ; . ; . ; . ; . ;	upstream_gene_variant ; cysS ; c.-1849C>T ; . ; . ; . ; . ;	upstream_gene_variant ; mrnC ; c.-3253C>T ; . ; . ; . ; . ;	upstream_gene_variant ; rlmB ; c.-3668C>T ; . ; . ; . ; . ;
NC_000964.3	111628	T	A	228	hom	161	160	gltX	gene-BSU_00920	111047	112498	+	synonymous_variant ; gltX ; c.582T>A ; p.Pro194Pro ; 582/1452 ; 582/1452 ; 194/483 ;	synonymous_variant ; gltX ; c.582T>A ; p.Pro194Pro ; 582/1452 ; 582/1452 ; 194/483 ;	upstream_gene_variant ; cysE ; c.-1172T>A ; . ; . ; . ; . ;	upstream_gene_variant ; cysS ; c.-1822T>A ; . ; . ; . ; . ;	upstream_gene_variant ; mrnC ; c.-3226T>A ; . ; . ; . ; . ;	upstream_gene_variant ; rlmB ; c.-3641T>A ; . ; . ; . ; . ;
NC_000964.3	111634	T	C	225	hom	163	163	gltX	gene-BSU_00920	111047	112498	+	synonymous_variant ; gltX ; c.588T>C ; p.Tyr196Tyr ; 588/1452 ; 588/1452 ; 196/483 ;	synonymous_variant ; gltX ; c.588T>C ; p.Tyr196Tyr ; 588/1452 ; 588/1452 ; 196/483 ;	upstream_gene_variant ; cysE ; c.-1166T>C ; . ; . ; . ; . ;	upstream_gene_variant ; cysS ; c.-1816T>C ; . ; . ; . ; . ;	upstream_gene_variant ; mrnC ; c.-3220T>C ; . ; . ; . ; . ;	upstream_gene_variant ; rlmB ; c.-3635T>C ; . ; . ; . ; . ;
NC_000964.3	111649	T	G	225	hom	167	167	gltX	gene-BSU_00920	111047	112498	+	synonymous_variant ; gltX ; c.603T>G ; p.Ala201Ala ; 603/1452 ; 603/1452 ; 201/483 ;	synonymous_variant ; gltX ; c.603T>G ; p.Ala201Ala ; 603/1452 ; 603/1452 ; 201/483 ;	upstream_gene_variant ; cysE ; c.-1151T>G ; . ; . ; . ; . ;	upstream_gene_variant ; cysS ; c.-1801T>G ; . ; . ; . ; . ;	upstream_gene_variant ; mrnC ; c.-3205T>G ; . ; . ; . ; . ;	upstream_gene_variant ; rlmB ; c.-3620T>G ; . ; . ; . ; . ;
NC_000964.3	111730	C	T	225	hom	163	163	gltX	gene-BSU_00920	111047	112498	+	synonymous_variant ; gltX ; c.684C>T ; p.Ile228Ile ; 684/1452 ; 684/1452 ; 228/483 ;	synonymous_variant ; gltX ; c.684C>T ; p.Ile228Ile ; 684/1452 ; 684/1452 ; 228/483 ;	upstream_gene_variant ; cysE ; c.-1070C>T ; . ; . ; . ; . ;	upstream_gene_variant ; cysS ; c.-1720C>T ; . ; . ; . ; . ;	upstream_gene_variant ; mrnC ; c.-3124C>T ; . ; . ; . ; . ;	upstream_gene_variant ; rlmB ; c.-3539C>T ; . ; . ; . ; . ;
NC_000964.3	111745	G	A	225	hom	170	170	gltX	gene-BSU_00920	111047	112498	+	synonymous_variant ; gltX ; c.699G>A ; p.Gly233Gly ; 699/1452 ; 699/1452 ; 233/483 ;	synonymous_variant ; gltX ; c.699G>A ; p.Gly233Gly ; 699/1452 ; 699/1452 ; 233/483 ;	upstream_gene_variant ; cysE ; c.-1055G>A ; . ; . ; . ; . ;	upstream_gene_variant ; cysS ; c.-1705G>A ; . ; . ; . ; . ;	upstream_gene_variant ; mrnC ; c.-3109G>A ; . ; . ; . ; . ;	upstream_gene_variant ; rlmB ; c.-3524G>A ; . ; . ; . ; . ;
NC_000964.3	111781	T	C	225	hom	160	160	gltX	gene-BSU_00920	111047	112498	+	synonymous_variant ; gltX ; c.735T>C ; p.Ile245Ile ; 735/1452 ; 735/1452 ; 245/483 ;	synonymous_variant ; gltX ; c.735T>C ; p.Ile245Ile ; 735/1452 ; 735/1452 ; 245/483 ;	upstream_gene_variant ; cysE ; c.-1019T>C ; . ; . ; . ; . ;	upstream_gene_variant ; cysS ; c.-1669T>C ; . ; . ; . ; . ;	upstream_gene_variant ; mrnC ; c.-3073T>C ; . ; . ; . ; . ;	upstream_gene_variant ; rlmB ; c.-3488T>C ; . ; . ; . ; . ;
NC_000964.3	111808	C	T	225	hom	151	151	gltX	gene-BSU_00920	111047	112498	+	synonymous_variant ; gltX ; c.762C>T ; p.Ser254Ser ; 762/1452 ; 762/1452 ; 254/483 ;	synonymous_variant ; gltX ; c.762C>T ; p.Ser254Ser ; 762/1452 ; 762/1452 ; 254/483 ;	upstream_gene_variant ; cysE ; c.-992C>T ; . ; . ; . ; . ;	upstream_gene_variant ; cysS ; c.-1642C>T ; . ; . ; . ; . ;	upstream_gene_variant ; mrnC ; c.-3046C>T ; . ; . ; . ; . ;	upstream_gene_variant ; rlmB ; c.-3461C>T ; . ; . ; . ; . ;
NC_000964.3	111874	G	A	225	hom	134	134	gltX	gene-BSU_00920	111047	112498	+	synonymous_variant ; gltX ; c.828G>A ; p.Ala276Ala ; 828/1452 ; 828/1452 ; 276/483 ;	synonymous_variant ; gltX ; c.828G>A ; p.Ala276Ala ; 828/1452 ; 828/1452 ; 276/483 ;	upstream_gene_variant ; cysE ; c.-926G>A ; . ; . ; . ; . ;	upstream_gene_variant ; cysS ; c.-1576G>A ; . ; . ; . ; . ;	upstream_gene_variant ; mrnC ; c.-2980G>A ; . ; . ; . ; . ;	upstream_gene_variant ; rlmB ; c.-3395G>A ; . ; . ; . ; . ;
NC_000964.3	111893	T	C	225	hom	131	131	gltX	gene-BSU_00920	111047	112498	+	synonymous_variant ; gltX ; c.847T>C ; p.Leu283Leu ; 847/1452 ; 847/1452 ; 283/483 ;	synonymous_variant ; gltX ; c.847T>C ; p.Leu283Leu ; 847/1452 ; 847/1452 ; 283/483 ;	upstream_gene_variant ; cysE ; c.-907T>C ; . ; . ; . ; . ;	upstream_gene_variant ; cysS ; c.-1557T>C ; . ; . ; . ; . ;	upstream_gene_variant ; mrnC ; c.-2961T>C ; . ; . ; . ; . ;	upstream_gene_variant ; rlmB ; c.-3376T>C ; . ; . ; . ; . ;
NC_000964.3	111958	T	C	225	hom	125	125	gltX	gene-BSU_00920	111047	112498	+	synonymous_variant ; gltX ; c.912T>C ; p.Phe304Phe ; 912/1452 ; 912/1452 ; 304/483 ;	synonymous_variant ; gltX ; c.912T>C ; p.Phe304Phe ; 912/1452 ; 912/1452 ; 304/483 ;	upstream_gene_variant ; cysE ; c.-842T>C ; . ; . ; . ; . ;	upstream_gene_variant ; cysS ; c.-1492T>C ; . ; . ; . ; . ;	upstream_gene_variant ; mrnC ; c.-2896T>C ; . ; . ; . ; . ;	upstream_gene_variant ; rlmB ; c.-3311T>C ; . ; . ; . ; . ;
NC_000964.3	112064	C	T	225	hom	158	158	gltX	gene-BSU_00920	111047	112498	+	synonymous_variant ; gltX ; c.1018C>T ; p.Leu340Leu ; 1018/1452 ; 1018/1452 ; 340/483 ;	synonymous_variant ; gltX ; c.1018C>T ; p.Leu340Leu ; 1018/1452 ; 1018/1452 ; 340/483 ;	upstream_gene_variant ; cysE ; c.-736C>T ; . ; . ; . ; . ;	upstream_gene_variant ; cysS ; c.-1386C>T ; . ; . ; . ; . ;	upstream_gene_variant ; mrnC ; c.-2790C>T ; . ; . ; . ; . ;	upstream_gene_variant ; rlmB ; c.-3205C>T ; . ; . ; . ; . ;
NC_000964.3	112138	T	C	225	hom	166	166	gltX	gene-BSU_00920	111047	112498	+	synonymous_variant ; gltX ; c.1092T>C ; p.Arg364Arg ; 1092/1452 ; 1092/1452 ; 364/483 ;	synonymous_variant ; gltX ; c.1092T>C ; p.Arg364Arg ; 1092/1452 ; 1092/1452 ; 364/483 ;	upstream_gene_variant ; cysE ; c.-662T>C ; . ; . ; . ; . ;	upstream_gene_variant ; cysS ; c.-1312T>C ; . ; . ; . ; . ;	upstream_gene_variant ; mrnC ; c.-2716T>C ; . ; . ; . ; . ;	upstream_gene_variant ; rlmB ; c.-3131T>C ; . ; . ; . ; . ;
NC_000964.3	112291	A	G	225	hom	261	261	gltX	gene-BSU_00920	111047	112498	+	synonymous_variant ; gltX ; c.1245A>G ; p.Ala415Ala ; 1245/1452 ; 1245/1452 ; 415/483 ;	synonymous_variant ; gltX ; c.1245A>G ; p.Ala415Ala ; 1245/1452 ; 1245/1452 ; 415/483 ;	upstream_gene_variant ; cysE ; c.-509A>G ; . ; . ; . ; . ;	upstream_gene_variant ; cysS ; c.-1159A>G ; . ; . ; . ; . ;	upstream_gene_variant ; mrnC ; c.-2563A>G ; . ; . ; . ; . ;	upstream_gene_variant ; rlmB ; c.-2978A>G ; . ; . ; . ; . ;
NC_000964.3	112330	T	C	225	hom	269	269	gltX	gene-BSU_00920	111047	112498	+	synonymous_variant ; gltX ; c.1284T>C ; p.Asn428Asn ; 1284/1452 ; 1284/1452 ; 428/483 ;	synonymous_variant ; gltX ; c.1284T>C ; p.Asn428Asn ; 1284/1452 ; 1284/1452 ; 428/483 ;	upstream_gene_variant ; cysE ; c.-470T>C ; . ; . ; . ; . ;	upstream_gene_variant ; cysS ; c.-1120T>C ; . ; . ; . ; . ;	upstream_gene_variant ; mrnC ; c.-2524T>C ; . ; . ; . ; . ;	upstream_gene_variant ; rlmB ; c.-2939T>C ; . ; . ; . ; . ;
NC_000964.3	112372	T	C	225	hom	267	267	gltX	gene-BSU_00920	111047	112498	+	synonymous_variant ; gltX ; c.1326T>C ; p.His442His ; 1326/1452 ; 1326/1452 ; 442/483 ;	synonymous_variant ; gltX ; c.1326T>C ; p.His442His ; 1326/1452 ; 1326/1452 ; 442/483 ;	upstream_gene_variant ; cysE ; c.-428T>C ; . ; . ; . ; . ;	upstream_gene_variant ; cysS ; c.-1078T>C ; . ; . ; . ; . ;	upstream_gene_variant ; mrnC ; c.-2482T>C ; . ; . ; . ; . ;	upstream_gene_variant ; rlmB ; c.-2897T>C ; . ; . ; . ; . ;
NC_000964.3	112378	G	A	225	hom	255	255	gltX	gene-BSU_00920	111047	112498	+	synonymous_variant ; gltX ; c.1332G>A ; p.Gly444Gly ; 1332/1452 ; 1332/1452 ; 444/483 ;	synonymous_variant ; gltX ; c.1332G>A ; p.Gly444Gly ; 1332/1452 ; 1332/1452 ; 444/483 ;	upstream_gene_variant ; cysE ; c.-422G>A ; . ; . ; . ; . ;	upstream_gene_variant ; cysS ; c.-1072G>A ; . ; . ; . ; . ;	upstream_gene_variant ; mrnC ; c.-2476G>A ; . ; . ; . ; . ;	upstream_gene_variant ; rlmB ; c.-2891G>A ; . ; . ; . ; . ;
NC_000964.3	112489	G	A	225	hom	194	194	gltX	gene-BSU_00920	111047	112498	+	synonymous_variant ; gltX ; c.1443G>A ; p.Lys481Lys ; 1443/1452 ; 1443/1452 ; 481/483 ;	synonymous_variant ; gltX ; c.1443G>A ; p.Lys481Lys ; 1443/1452 ; 1443/1452 ; 481/483 ;	upstream_gene_variant ; cysE ; c.-311G>A ; . ; . ; . ; . ;	upstream_gene_variant ; cysS ; c.-961G>A ; . ; . ; . ; . ;	upstream_gene_variant ; mrnC ; c.-2365G>A ; . ; . ; . ; . ;	upstream_gene_variant ; rlmB ; c.-2780G>A ; . ; . ; . ; . ;
NC_000964.3	112556	T	C	225	hom	148	148	.	.	.	.	.	.	upstream_gene_variant ; cysE ; c.-244T>C ; . ; . ; . ; . ;	upstream_gene_variant ; cysS ; c.-894T>C ; . ; . ; . ; . ;	upstream_gene_variant ; mrnC ; c.-2298T>C ; . ; . ; . ; . ;	upstream_gene_variant ; rlmB ; c.-2713T>C ; . ; . ; . ; . ;	upstream_gene_variant ; raeA ; c.-3469T>C ; . ; . ; . ; . ;
NC_000964.3	112631	T	C	225	hom	93	93	.	.	.	.	.	.	upstream_gene_variant ; cysE ; c.-169T>C ; . ; . ; . ; . ;	upstream_gene_variant ; cysS ; c.-819T>C ; . ; . ; . ; . ;	upstream_gene_variant ; mrnC ; c.-2223T>C ; . ; . ; . ; . ;	upstream_gene_variant ; rlmB ; c.-2638T>C ; . ; . ; . ; . ;	upstream_gene_variant ; raeA ; c.-3394T>C ; . ; . ; . ; . ;
NC_000964.3	113132	A	G	225	hom	108	108	cysE	gene-BSU_00930	112800	113453	+	synonymous_variant ; cysE ; c.333A>G ; p.Gly111Gly ; 333/654 ; 333/654 ; 111/217 ;	synonymous_variant ; cysE ; c.333A>G ; p.Gly111Gly ; 333/654 ; 333/654 ; 111/217 ;	upstream_gene_variant ; cysS ; c.-318A>G ; . ; . ; . ; . ;	upstream_gene_variant ; mrnC ; c.-1722A>G ; . ; . ; . ; . ;	upstream_gene_variant ; rlmB ; c.-2137A>G ; . ; . ; . ; . ;	upstream_gene_variant ; raeA ; c.-2893A>G ; . ; . ; . ; . ;
NC_000964.3	113237	C	G	225	hom	121	121	cysE	gene-BSU_00930	112800	113453	+	synonymous_variant ; cysE ; c.438C>G ; p.Gly146Gly ; 438/654 ; 438/654 ; 146/217 ;	synonymous_variant ; cysE ; c.438C>G ; p.Gly146Gly ; 438/654 ; 438/654 ; 146/217 ;	upstream_gene_variant ; cysS ; c.-213C>G ; . ; . ; . ; . ;	upstream_gene_variant ; mrnC ; c.-1617C>G ; . ; . ; . ; . ;	upstream_gene_variant ; rlmB ; c.-2032C>G ; . ; . ; . ; . ;	upstream_gene_variant ; raeA ; c.-2788C>G ; . ; . ; . ; . ;
NC_000964.3	113938	A	T	225	hom	189	189	cysS	gene-BSU_00940	113450	114850	+	synonymous_variant ; cysS ; c.489A>T ; p.Leu163Leu ; 489/1401 ; 489/1401 ; 163/466 ;	synonymous_variant ; cysS ; c.489A>T ; p.Leu163Leu ; 489/1401 ; 489/1401 ; 163/466 ;	upstream_gene_variant ; mrnC ; c.-916A>T ; . ; . ; . ; . ;	upstream_gene_variant ; rlmB ; c.-1331A>T ; . ; . ; . ; . ;	upstream_gene_variant ; raeA ; c.-2087A>T ; . ; . ; . ; . ;	upstream_gene_variant ; sigH ; c.-2662A>T ; . ; . ; . ; . ;
NC_000964.3	113959	G	A	225	hom	186	186	cysS	gene-BSU_00940	113450	114850	+	synonymous_variant ; cysS ; c.510G>A ; p.Arg170Arg ; 510/1401 ; 510/1401 ; 170/466 ;	synonymous_variant ; cysS ; c.510G>A ; p.Arg170Arg ; 510/1401 ; 510/1401 ; 170/466 ;	upstream_gene_variant ; mrnC ; c.-895G>A ; . ; . ; . ; . ;	upstream_gene_variant ; rlmB ; c.-1310G>A ; . ; . ; . ; . ;	upstream_gene_variant ; raeA ; c.-2066G>A ; . ; . ; . ; . ;	upstream_gene_variant ; sigH ; c.-2641G>A ; . ; . ; . ; . ;
NC_000964.3	113996	C	T	225	hom	214	214	cysS	gene-BSU_00940	113450	114850	+	synonymous_variant ; cysS ; c.547C>T ; p.Leu183Leu ; 547/1401 ; 547/1401 ; 183/466 ;	synonymous_variant ; cysS ; c.547C>T ; p.Leu183Leu ; 547/1401 ; 547/1401 ; 183/466 ;	upstream_gene_variant ; mrnC ; c.-858C>T ; . ; . ; . ; . ;	upstream_gene_variant ; rlmB ; c.-1273C>T ; . ; . ; . ; . ;	upstream_gene_variant ; raeA ; c.-2029C>T ; . ; . ; . ; . ;	upstream_gene_variant ; sigH ; c.-2604C>T ; . ; . ; . ; . ;
NC_000964.3	114046	G	A	225	hom	240	240	cysS	gene-BSU_00940	113450	114850	+	synonymous_variant ; cysS ; c.597G>A ; p.Gly199Gly ; 597/1401 ; 597/1401 ; 199/466 ;	synonymous_variant ; cysS ; c.597G>A ; p.Gly199Gly ; 597/1401 ; 597/1401 ; 199/466 ;	upstream_gene_variant ; mrnC ; c.-808G>A ; . ; . ; . ; . ;	upstream_gene_variant ; rlmB ; c.-1223G>A ; . ; . ; . ; . ;	upstream_gene_variant ; raeA ; c.-1979G>A ; . ; . ; . ; . ;	upstream_gene_variant ; sigH ; c.-2554G>A ; . ; . ; . ; . ;
NC_000964.3	114052	G	A	225	hom	246	246	cysS	gene-BSU_00940	113450	114850	+	synonymous_variant ; cysS ; c.603G>A ; p.Gly201Gly ; 603/1401 ; 603/1401 ; 201/466 ;	synonymous_variant ; cysS ; c.603G>A ; p.Gly201Gly ; 603/1401 ; 603/1401 ; 201/466 ;	upstream_gene_variant ; mrnC ; c.-802G>A ; . ; . ; . ; . ;	upstream_gene_variant ; rlmB ; c.-1217G>A ; . ; . ; . ; . ;	upstream_gene_variant ; raeA ; c.-1973G>A ; . ; . ; . ; . ;	upstream_gene_variant ; sigH ; c.-2548G>A ; . ; . ; . ; . ;
NC_000964.3	114100	C	G	225	hom	232	232	cysS	gene-BSU_00940	113450	114850	+	synonymous_variant ; cysS ; c.651C>G ; p.Leu217Leu ; 651/1401 ; 651/1401 ; 217/466 ;	synonymous_variant ; cysS ; c.651C>G ; p.Leu217Leu ; 651/1401 ; 651/1401 ; 217/466 ;	upstream_gene_variant ; mrnC ; c.-754C>G ; . ; . ; . ; . ;	upstream_gene_variant ; rlmB ; c.-1169C>G ; . ; . ; . ; . ;	upstream_gene_variant ; raeA ; c.-1925C>G ; . ; . ; . ; . ;	upstream_gene_variant ; sigH ; c.-2500C>G ; . ; . ; . ; . ;
NC_000964.3	114181	G	A	225	hom	208	208	cysS	gene-BSU_00940	113450	114850	+	synonymous_variant ; cysS ; c.732G>A ; p.Ala244Ala ; 732/1401 ; 732/1401 ; 244/466 ;	synonymous_variant ; cysS ; c.732G>A ; p.Ala244Ala ; 732/1401 ; 732/1401 ; 244/466 ;	upstream_gene_variant ; mrnC ; c.-673G>A ; . ; . ; . ; . ;	upstream_gene_variant ; rlmB ; c.-1088G>A ; . ; . ; . ; . ;	upstream_gene_variant ; raeA ; c.-1844G>A ; . ; . ; . ; . ;	upstream_gene_variant ; sigH ; c.-2419G>A ; . ; . ; . ; . ;
NC_000964.3	114182	C	T	225	hom	208	208	cysS	gene-BSU_00940	113450	114850	+	synonymous_variant ; cysS ; c.733C>T ; p.Leu245Leu ; 733/1401 ; 733/1401 ; 245/466 ;	synonymous_variant ; cysS ; c.733C>T ; p.Leu245Leu ; 733/1401 ; 733/1401 ; 245/466 ;	upstream_gene_variant ; mrnC ; c.-672C>T ; . ; . ; . ; . ;	upstream_gene_variant ; rlmB ; c.-1087C>T ; . ; . ; . ; . ;	upstream_gene_variant ; raeA ; c.-1843C>T ; . ; . ; . ; . ;	upstream_gene_variant ; sigH ; c.-2418C>T ; . ; . ; . ; . ;
NC_000964.3	114190	C	A	225	hom	203	203	cysS	gene-BSU_00940	113450	114850	+	synonymous_variant ; cysS ; c.741C>A ; p.Gly247Gly ; 741/1401 ; 741/1401 ; 247/466 ;	synonymous_variant ; cysS ; c.741C>A ; p.Gly247Gly ; 741/1401 ; 741/1401 ; 247/466 ;	upstream_gene_variant ; mrnC ; c.-664C>A ; . ; . ; . ; . ;	upstream_gene_variant ; rlmB ; c.-1079C>A ; . ; . ; . ; . ;	upstream_gene_variant ; raeA ; c.-1835C>A ; . ; . ; . ; . ;	upstream_gene_variant ; sigH ; c.-2410C>A ; . ; . ; . ; . ;
NC_000964.3	114214	T	C	225	hom	200	200	cysS	gene-BSU_00940	113450	114850	+	synonymous_variant ; cysS ; c.765T>C ; p.Leu255Leu ; 765/1401 ; 765/1401 ; 255/466 ;	synonymous_variant ; cysS ; c.765T>C ; p.Leu255Leu ; 765/1401 ; 765/1401 ; 255/466 ;	upstream_gene_variant ; mrnC ; c.-640T>C ; . ; . ; . ; . ;	upstream_gene_variant ; rlmB ; c.-1055T>C ; . ; . ; . ; . ;	upstream_gene_variant ; raeA ; c.-1811T>C ; . ; . ; . ; . ;	upstream_gene_variant ; sigH ; c.-2386T>C ; . ; . ; . ; . ;
NC_000964.3	114223	T	C	225	hom	187	187	cysS	gene-BSU_00940	113450	114850	+	synonymous_variant ; cysS ; c.774T>C ; p.Gly258Gly ; 774/1401 ; 774/1401 ; 258/466 ;	synonymous_variant ; cysS ; c.774T>C ; p.Gly258Gly ; 774/1401 ; 774/1401 ; 258/466 ;	upstream_gene_variant ; mrnC ; c.-631T>C ; . ; . ; . ; . ;	upstream_gene_variant ; rlmB ; c.-1046T>C ; . ; . ; . ; . ;	upstream_gene_variant ; raeA ; c.-1802T>C ; . ; . ; . ; . ;	upstream_gene_variant ; sigH ; c.-2377T>C ; . ; . ; . ; . ;
NC_000964.3	114262	A	G	225	hom	173	173	cysS	gene-BSU_00940	113450	114850	+	synonymous_variant ; cysS ; c.813A>G ; p.Leu271Leu ; 813/1401 ; 813/1401 ; 271/466 ;	synonymous_variant ; cysS ; c.813A>G ; p.Leu271Leu ; 813/1401 ; 813/1401 ; 271/466 ;	upstream_gene_variant ; mrnC ; c.-592A>G ; . ; . ; . ; . ;	upstream_gene_variant ; rlmB ; c.-1007A>G ; . ; . ; . ; . ;	upstream_gene_variant ; raeA ; c.-1763A>G ; . ; . ; . ; . ;	upstream_gene_variant ; sigH ; c.-2338A>G ; . ; . ; . ; . ;
NC_000964.3	114370	G	A	225	hom	132	132	cysS	gene-BSU_00940	113450	114850	+	synonymous_variant ; cysS ; c.921G>A ; p.Glu307Glu ; 921/1401 ; 921/1401 ; 307/466 ;	synonymous_variant ; cysS ; c.921G>A ; p.Glu307Glu ; 921/1401 ; 921/1401 ; 307/466 ;	upstream_gene_variant ; mrnC ; c.-484G>A ; . ; . ; . ; . ;	upstream_gene_variant ; rlmB ; c.-899G>A ; . ; . ; . ; . ;	upstream_gene_variant ; raeA ; c.-1655G>A ; . ; . ; . ; . ;	upstream_gene_variant ; sigH ; c.-2230G>A ; . ; . ; . ; . ;
NC_000964.3	114376	G	A	225	hom	130	130	cysS	gene-BSU_00940	113450	114850	+	synonymous_variant ; cysS ; c.927G>A ; p.Leu309Leu ; 927/1401 ; 927/1401 ; 309/466 ;	synonymous_variant ; cysS ; c.927G>A ; p.Leu309Leu ; 927/1401 ; 927/1401 ; 309/466 ;	upstream_gene_variant ; mrnC ; c.-478G>A ; . ; . ; . ; . ;	upstream_gene_variant ; rlmB ; c.-893G>A ; . ; . ; . ; . ;	upstream_gene_variant ; raeA ; c.-1649G>A ; . ; . ; . ; . ;	upstream_gene_variant ; sigH ; c.-2224G>A ; . ; . ; . ; . ;
NC_000964.3	114379	G	A	228	hom	131	130	cysS	gene-BSU_00940	113450	114850	+	synonymous_variant ; cysS ; c.930G>A ; p.Glu310Glu ; 930/1401 ; 930/1401 ; 310/466 ;	synonymous_variant ; cysS ; c.930G>A ; p.Glu310Glu ; 930/1401 ; 930/1401 ; 310/466 ;	upstream_gene_variant ; mrnC ; c.-475G>A ; . ; . ; . ; . ;	upstream_gene_variant ; rlmB ; c.-890G>A ; . ; . ; . ; . ;	upstream_gene_variant ; raeA ; c.-1646G>A ; . ; . ; . ; . ;	upstream_gene_variant ; sigH ; c.-2221G>A ; . ; . ; . ; . ;
NC_000964.3	114394	G	A	225	hom	120	120	cysS	gene-BSU_00940	113450	114850	+	synonymous_variant ; cysS ; c.945G>A ; p.Ala315Ala ; 945/1401 ; 945/1401 ; 315/466 ;	synonymous_variant ; cysS ; c.945G>A ; p.Ala315Ala ; 945/1401 ; 945/1401 ; 315/466 ;	upstream_gene_variant ; mrnC ; c.-460G>A ; . ; . ; . ; . ;	upstream_gene_variant ; rlmB ; c.-875G>A ; . ; . ; . ; . ;	upstream_gene_variant ; raeA ; c.-1631G>A ; . ; . ; . ; . ;	upstream_gene_variant ; sigH ; c.-2206G>A ; . ; . ; . ; . ;
NC_000964.3	114397	C	T	225	hom	118	118	cysS	gene-BSU_00940	113450	114850	+	synonymous_variant ; cysS ; c.948C>T ; p.Phe316Phe ; 948/1401 ; 948/1401 ; 316/466 ;	synonymous_variant ; cysS ; c.948C>T ; p.Phe316Phe ; 948/1401 ; 948/1401 ; 316/466 ;	upstream_gene_variant ; mrnC ; c.-457C>T ; . ; . ; . ; . ;	upstream_gene_variant ; rlmB ; c.-872C>T ; . ; . ; . ; . ;	upstream_gene_variant ; raeA ; c.-1628C>T ; . ; . ; . ; . ;	upstream_gene_variant ; sigH ; c.-2203C>T ; . ; . ; . ; . ;
NC_000964.3	114399	G	A	225	hom	120	120	cysS	gene-BSU_00940	113450	114850	+	missense_variant ; cysS ; c.950G>A ; p.Ser317Asn ; 950/1401 ; 950/1401 ; 317/466 ;	missense_variant ; cysS ; c.950G>A ; p.Ser317Asn ; 950/1401 ; 950/1401 ; 317/466 ;	upstream_gene_variant ; mrnC ; c.-455G>A ; . ; . ; . ; . ;	upstream_gene_variant ; rlmB ; c.-870G>A ; . ; . ; . ; . ;	upstream_gene_variant ; raeA ; c.-1626G>A ; . ; . ; . ; . ;	upstream_gene_variant ; sigH ; c.-2201G>A ; . ; . ; . ; . ;
NC_000964.3	114427	T	C	225	hom	119	119	cysS	gene-BSU_00940	113450	114850	+	synonymous_variant ; cysS ; c.978T>C ; p.Leu326Leu ; 978/1401 ; 978/1401 ; 326/466 ;	synonymous_variant ; cysS ; c.978T>C ; p.Leu326Leu ; 978/1401 ; 978/1401 ; 326/466 ;	upstream_gene_variant ; mrnC ; c.-427T>C ; . ; . ; . ; . ;	upstream_gene_variant ; rlmB ; c.-842T>C ; . ; . ; . ; . ;	upstream_gene_variant ; raeA ; c.-1598T>C ; . ; . ; . ; . ;	upstream_gene_variant ; sigH ; c.-2173T>C ; . ; . ; . ; . ;
NC_000964.3	114460	C	G	225	hom	121	121	cysS	gene-BSU_00940	113450	114850	+	synonymous_variant ; cysS ; c.1011C>G ; p.Thr337Thr ; 1011/1401 ; 1011/1401 ; 337/466 ;	synonymous_variant ; cysS ; c.1011C>G ; p.Thr337Thr ; 1011/1401 ; 1011/1401 ; 337/466 ;	upstream_gene_variant ; mrnC ; c.-394C>G ; . ; . ; . ; . ;	upstream_gene_variant ; rlmB ; c.-809C>G ; . ; . ; . ; . ;	upstream_gene_variant ; raeA ; c.-1565C>G ; . ; . ; . ; . ;	upstream_gene_variant ; sigH ; c.-2140C>G ; . ; . ; . ; . ;
NC_000964.3	114484	A	G	228	hom	118	116	cysS	gene-BSU_00940	113450	114850	+	synonymous_variant ; cysS ; c.1035A>G ; p.Glu345Glu ; 1035/1401 ; 1035/1401 ; 345/466 ;	synonymous_variant ; cysS ; c.1035A>G ; p.Glu345Glu ; 1035/1401 ; 1035/1401 ; 345/466 ;	upstream_gene_variant ; mrnC ; c.-370A>G ; . ; . ; . ; . ;	upstream_gene_variant ; rlmB ; c.-785A>G ; . ; . ; . ; . ;	upstream_gene_variant ; raeA ; c.-1541A>G ; . ; . ; . ; . ;	upstream_gene_variant ; sigH ; c.-2116A>G ; . ; . ; . ; . ;
NC_000964.3	114487	G	A	225	hom	115	115	cysS	gene-BSU_00940	113450	114850	+	synonymous_variant ; cysS ; c.1038G>A ; p.Lys346Lys ; 1038/1401 ; 1038/1401 ; 346/466 ;	synonymous_variant ; cysS ; c.1038G>A ; p.Lys346Lys ; 1038/1401 ; 1038/1401 ; 346/466 ;	upstream_gene_variant ; mrnC ; c.-367G>A ; . ; . ; . ; . ;	upstream_gene_variant ; rlmB ; c.-782G>A ; . ; . ; . ; . ;	upstream_gene_variant ; raeA ; c.-1538G>A ; . ; . ; . ; . ;	upstream_gene_variant ; sigH ; c.-2113G>A ; . ; . ; . ; . ;
NC_000964.3	114505	A	T	225	hom	121	121	cysS	gene-BSU_00940	113450	114850	+	missense_variant ; cysS ; c.1056A>T ; p.Lys352Asn ; 1056/1401 ; 1056/1401 ; 352/466 ;	missense_variant ; cysS ; c.1056A>T ; p.Lys352Asn ; 1056/1401 ; 1056/1401 ; 352/466 ;	upstream_gene_variant ; mrnC ; c.-349A>T ; . ; . ; . ; . ;	upstream_gene_variant ; rlmB ; c.-764A>T ; . ; . ; . ; . ;	upstream_gene_variant ; raeA ; c.-1520A>T ; . ; . ; . ; . ;	upstream_gene_variant ; sigH ; c.-2095A>T ; . ; . ; . ; . ;
NC_000964.3	114519	A	C	225	hom	120	120	cysS	gene-BSU_00940	113450	114850	+	missense_variant ; cysS ; c.1070A>C ; p.Glu357Ala ; 1070/1401 ; 1070/1401 ; 357/466 ;	missense_variant ; cysS ; c.1070A>C ; p.Glu357Ala ; 1070/1401 ; 1070/1401 ; 357/466 ;	upstream_gene_variant ; mrnC ; c.-335A>C ; . ; . ; . ; . ;	upstream_gene_variant ; rlmB ; c.-750A>C ; . ; . ; . ; . ;	upstream_gene_variant ; raeA ; c.-1506A>C ; . ; . ; . ; . ;	upstream_gene_variant ; sigH ; c.-2081A>C ; . ; . ; . ; . ;
NC_000964.3	114550	C	G	225	hom	123	123	cysS	gene-BSU_00940	113450	114850	+	synonymous_variant ; cysS ; c.1101C>G ; p.Ala367Ala ; 1101/1401 ; 1101/1401 ; 367/466 ;	synonymous_variant ; cysS ; c.1101C>G ; p.Ala367Ala ; 1101/1401 ; 1101/1401 ; 367/466 ;	upstream_gene_variant ; mrnC ; c.-304C>G ; . ; . ; . ; . ;	upstream_gene_variant ; rlmB ; c.-719C>G ; . ; . ; . ; . ;	upstream_gene_variant ; raeA ; c.-1475C>G ; . ; . ; . ; . ;	upstream_gene_variant ; sigH ; c.-2050C>G ; . ; . ; . ; . ;
NC_000964.3	114556	A	T	225	hom	128	128	cysS	gene-BSU_00940	113450	114850	+	synonymous_variant ; cysS ; c.1107A>T ; p.Ser369Ser ; 1107/1401 ; 1107/1401 ; 369/466 ;	synonymous_variant ; cysS ; c.1107A>T ; p.Ser369Ser ; 1107/1401 ; 1107/1401 ; 369/466 ;	upstream_gene_variant ; mrnC ; c.-298A>T ; . ; . ; . ; . ;	upstream_gene_variant ; rlmB ; c.-713A>T ; . ; . ; . ; . ;	upstream_gene_variant ; raeA ; c.-1469A>T ; . ; . ; . ; . ;	upstream_gene_variant ; sigH ; c.-2044A>T ; . ; . ; . ; . ;
NC_000964.3	114565	T	C	225	hom	131	131	cysS	gene-BSU_00940	113450	114850	+	synonymous_variant ; cysS ; c.1116T>C ; p.Phe372Phe ; 1116/1401 ; 1116/1401 ; 372/466 ;	synonymous_variant ; cysS ; c.1116T>C ; p.Phe372Phe ; 1116/1401 ; 1116/1401 ; 372/466 ;	upstream_gene_variant ; mrnC ; c.-289T>C ; . ; . ; . ; . ;	upstream_gene_variant ; rlmB ; c.-704T>C ; . ; . ; . ; . ;	upstream_gene_variant ; raeA ; c.-1460T>C ; . ; . ; . ; . ;	upstream_gene_variant ; sigH ; c.-2035T>C ; . ; . ; . ; . ;
NC_000964.3	114589	T	C	225	hom	130	130	cysS	gene-BSU_00940	113450	114850	+	synonymous_variant ; cysS ; c.1140T>C ; p.Tyr380Tyr ; 1140/1401 ; 1140/1401 ; 380/466 ;	synonymous_variant ; cysS ; c.1140T>C ; p.Tyr380Tyr ; 1140/1401 ; 1140/1401 ; 380/466 ;	upstream_gene_variant ; mrnC ; c.-265T>C ; . ; . ; . ; . ;	upstream_gene_variant ; rlmB ; c.-680T>C ; . ; . ; . ; . ;	upstream_gene_variant ; raeA ; c.-1436T>C ; . ; . ; . ; . ;	upstream_gene_variant ; sigH ; c.-2011T>C ; . ; . ; . ; . ;
NC_000964.3	114604	T	C	225	hom	134	134	cysS	gene-BSU_00940	113450	114850	+	synonymous_variant ; cysS ; c.1155T>C ; p.Asp385Asp ; 1155/1401 ; 1155/1401 ; 385/466 ;	synonymous_variant ; cysS ; c.1155T>C ; p.Asp385Asp ; 1155/1401 ; 1155/1401 ; 385/466 ;	upstream_gene_variant ; mrnC ; c.-250T>C ; . ; . ; . ; . ;	upstream_gene_variant ; rlmB ; c.-665T>C ; . ; . ; . ; . ;	upstream_gene_variant ; raeA ; c.-1421T>C ; . ; . ; . ; . ;	upstream_gene_variant ; sigH ; c.-1996T>C ; . ; . ; . ; . ;
NC_000964.3	114610	G	A	228	hom	133	132	cysS	gene-BSU_00940	113450	114850	+	synonymous_variant ; cysS ; c.1161G>A ; p.Thr387Thr ; 1161/1401 ; 1161/1401 ; 387/466 ;	synonymous_variant ; cysS ; c.1161G>A ; p.Thr387Thr ; 1161/1401 ; 1161/1401 ; 387/466 ;	upstream_gene_variant ; mrnC ; c.-244G>A ; . ; . ; . ; . ;	upstream_gene_variant ; rlmB ; c.-659G>A ; . ; . ; . ; . ;	upstream_gene_variant ; raeA ; c.-1415G>A ; . ; . ; . ; . ;	upstream_gene_variant ; sigH ; c.-1990G>A ; . ; . ; . ; . ;
NC_000964.3	114622	G	A	225	hom	139	139	cysS	gene-BSU_00940	113450	114850	+	synonymous_variant ; cysS ; c.1173G>A ; p.Val391Val ; 1173/1401 ; 1173/1401 ; 391/466 ;	synonymous_variant ; cysS ; c.1173G>A ; p.Val391Val ; 1173/1401 ; 1173/1401 ; 391/466 ;	upstream_gene_variant ; mrnC ; c.-232G>A ; . ; . ; . ; . ;	upstream_gene_variant ; rlmB ; c.-647G>A ; . ; . ; . ; . ;	upstream_gene_variant ; raeA ; c.-1403G>A ; . ; . ; . ; . ;	upstream_gene_variant ; sigH ; c.-1978G>A ; . ; . ; . ; . ;
NC_000964.3	114637	T	C	225	hom	129	129	cysS	gene-BSU_00940	113450	114850	+	synonymous_variant ; cysS ; c.1188T>C ; p.Ile396Ile ; 1188/1401 ; 1188/1401 ; 396/466 ;	synonymous_variant ; cysS ; c.1188T>C ; p.Ile396Ile ; 1188/1401 ; 1188/1401 ; 396/466 ;	upstream_gene_variant ; mrnC ; c.-217T>C ; . ; . ; . ; . ;	upstream_gene_variant ; rlmB ; c.-632T>C ; . ; . ; . ; . ;	upstream_gene_variant ; raeA ; c.-1388T>C ; . ; . ; . ; . ;	upstream_gene_variant ; sigH ; c.-1963T>C ; . ; . ; . ; . ;
NC_000964.3	114652	C	T	225	hom	125	125	cysS	gene-BSU_00940	113450	114850	+	synonymous_variant ; cysS ; c.1203C>T ; p.Arg401Arg ; 1203/1401 ; 1203/1401 ; 401/466 ;	synonymous_variant ; cysS ; c.1203C>T ; p.Arg401Arg ; 1203/1401 ; 1203/1401 ; 401/466 ;	upstream_gene_variant ; mrnC ; c.-202C>T ; . ; . ; . ; . ;	upstream_gene_variant ; rlmB ; c.-617C>T ; . ; . ; . ; . ;	upstream_gene_variant ; raeA ; c.-1373C>T ; . ; . ; . ; . ;	upstream_gene_variant ; sigH ; c.-1948C>T ; . ; . ; . ; . ;
NC_000964.3	114721	C	T	225	hom	142	142	cysS	gene-BSU_00940	113450	114850	+	synonymous_variant ; cysS ; c.1272C>T ; p.Ile424Ile ; 1272/1401 ; 1272/1401 ; 424/466 ;	synonymous_variant ; cysS ; c.1272C>T ; p.Ile424Ile ; 1272/1401 ; 1272/1401 ; 424/466 ;	upstream_gene_variant ; mrnC ; c.-133C>T ; . ; . ; . ; . ;	upstream_gene_variant ; rlmB ; c.-548C>T ; . ; . ; . ; . ;	upstream_gene_variant ; raeA ; c.-1304C>T ; . ; . ; . ; . ;	upstream_gene_variant ; sigH ; c.-1879C>T ; . ; . ; . ; . ;
NC_000964.3	115267	A	G	225	hom	369	369	mrnC	gene-BSU_00950	114854	115285	+	synonymous_variant ; mrnC ; c.414A>G ; p.Thr138Thr ; 414/432 ; 414/432 ; 138/143 ;	synonymous_variant ; mrnC ; c.414A>G ; p.Thr138Thr ; 414/432 ; 414/432 ; 138/143 ;	upstream_gene_variant ; rlmB ; c.-2A>G ; . ; . ; . ; . ;	upstream_gene_variant ; raeA ; c.-758A>G ; . ; . ; . ; . ;	upstream_gene_variant ; sigH ; c.-1333A>G ; . ; . ; . ; . ;	upstream_gene_variant ; rpmGB ; c.-2082A>G ; . ; . ; . ; . ;
NC_000964.3	115819	T	A	225	hom	289	289	rlmB	gene-BSU_00960	115269	116018	+	missense_variant ; rlmB ; c.551T>A ; p.Phe184Tyr ; 551/750 ; 551/750 ; 184/249 ;	missense_variant ; rlmB ; c.551T>A ; p.Phe184Tyr ; 551/750 ; 551/750 ; 184/249 ;	upstream_gene_variant ; raeA ; c.-206T>A ; . ; . ; . ; . ;	upstream_gene_variant ; sigH ; c.-781T>A ; . ; . ; . ; . ;	upstream_gene_variant ; rpmGB ; c.-1530T>A ; . ; . ; . ; . ;	upstream_gene_variant ; secE ; c.-1713T>A ; . ; . ; . ; . ;
NC_000964.3	115886	C	T	225	hom	220	220	rlmB	gene-BSU_00960	115269	116018	+	synonymous_variant ; rlmB ; c.618C>T ; p.Arg206Arg ; 618/750 ; 618/750 ; 206/249 ;	synonymous_variant ; rlmB ; c.618C>T ; p.Arg206Arg ; 618/750 ; 618/750 ; 206/249 ;	upstream_gene_variant ; raeA ; c.-139C>T ; . ; . ; . ; . ;	upstream_gene_variant ; sigH ; c.-714C>T ; . ; . ; . ; . ;	upstream_gene_variant ; rpmGB ; c.-1463C>T ; . ; . ; . ; . ;	upstream_gene_variant ; secE ; c.-1646C>T ; . ; . ; . ; . ;
NC_000964.3	115892	G	A	225	hom	212	212	rlmB	gene-BSU_00960	115269	116018	+	synonymous_variant ; rlmB ; c.624G>A ; p.Val208Val ; 624/750 ; 624/750 ; 208/249 ;	synonymous_variant ; rlmB ; c.624G>A ; p.Val208Val ; 624/750 ; 624/750 ; 208/249 ;	upstream_gene_variant ; raeA ; c.-133G>A ; . ; . ; . ; . ;	upstream_gene_variant ; sigH ; c.-708G>A ; . ; . ; . ; . ;	upstream_gene_variant ; rpmGB ; c.-1457G>A ; . ; . ; . ; . ;	upstream_gene_variant ; secE ; c.-1640G>A ; . ; . ; . ; . ;
NC_000964.3	116007	G	C	225	hom	212	212	rlmB	gene-BSU_00960	115269	116018	+	missense_variant ; rlmB ; c.739G>C ; p.Val247Leu ; 739/750 ; 739/750 ; 247/249 ;	missense_variant ; rlmB ; c.739G>C ; p.Val247Leu ; 739/750 ; 739/750 ; 247/249 ;	upstream_gene_variant ; raeA ; c.-18G>C ; . ; . ; . ; . ;	upstream_gene_variant ; sigH ; c.-593G>C ; . ; . ; . ; . ;	upstream_gene_variant ; rpmGB ; c.-1342G>C ; . ; . ; . ; . ;	upstream_gene_variant ; secE ; c.-1525G>C ; . ; . ; . ; . ;
NC_000964.3	116397	C	T	225	hom	96	96	raeA	gene-BSU_00970	116025	116537	+	synonymous_variant ; raeA ; c.373C>T ; p.Leu125Leu ; 373/513 ; 373/513 ; 125/170 ;	synonymous_variant ; raeA ; c.373C>T ; p.Leu125Leu ; 373/513 ; 373/513 ; 125/170 ;	upstream_gene_variant ; sigH ; c.-203C>T ; . ; . ; . ; . ;	upstream_gene_variant ; rpmGB ; c.-952C>T ; . ; . ; . ; . ;	upstream_gene_variant ; secE ; c.-1135C>T ; . ; . ; . ; . ;	upstream_gene_variant ; nusG ; c.-1493C>T ; . ; . ; . ; . ;
NC_000964.3	116866	T	C	225	hom	137	137	sigH	gene-BSU_00980	116600	117256	+	synonymous_variant ; sigH ; c.267T>C ; p.Phe89Phe ; 267/657 ; 267/657 ; 89/218 ;	synonymous_variant ; sigH ; c.267T>C ; p.Phe89Phe ; 267/657 ; 267/657 ; 89/218 ;	upstream_gene_variant ; rpmGB ; c.-483T>C ; . ; . ; . ; . ;	upstream_gene_variant ; secE ; c.-666T>C ; . ; . ; . ; . ;	upstream_gene_variant ; nusG ; c.-1024T>C ; . ; . ; . ; . ;	upstream_gene_variant ; rplK ; c.-1725T>C ; . ; . ; . ; . ;
NC_000964.3	116949	C	T	225	hom	136	136	sigH	gene-BSU_00980	116600	117256	+	missense_variant ; sigH ; c.350C>T ; p.Ala117Val ; 350/657 ; 350/657 ; 117/218 ;	missense_variant ; sigH ; c.350C>T ; p.Ala117Val ; 350/657 ; 350/657 ; 117/218 ;	upstream_gene_variant ; rpmGB ; c.-400C>T ; . ; . ; . ; . ;	upstream_gene_variant ; secE ; c.-583C>T ; . ; . ; . ; . ;	upstream_gene_variant ; nusG ; c.-941C>T ; . ; . ; . ; . ;	upstream_gene_variant ; rplK ; c.-1642C>T ; . ; . ; . ; . ;
NC_000964.3	116968	C	T	225	hom	137	137	sigH	gene-BSU_00980	116600	117256	+	synonymous_variant ; sigH ; c.369C>T ; p.Ile123Ile ; 369/657 ; 369/657 ; 123/218 ;	synonymous_variant ; sigH ; c.369C>T ; p.Ile123Ile ; 369/657 ; 369/657 ; 123/218 ;	upstream_gene_variant ; rpmGB ; c.-381C>T ; . ; . ; . ; . ;	upstream_gene_variant ; secE ; c.-564C>T ; . ; . ; . ; . ;	upstream_gene_variant ; nusG ; c.-922C>T ; . ; . ; . ; . ;	upstream_gene_variant ; rplK ; c.-1623C>T ; . ; . ; . ; . ;
NC_000964.3	117766	A	C	225	hom	122	122	.	.	.	.	.	.	upstream_gene_variant ; nusG ; c.-124A>C ; . ; . ; . ; . ;	upstream_gene_variant ; rplK ; c.-825A>C ; . ; . ; . ; . ;	upstream_gene_variant ; rplA ; c.-1345A>C ; . ; . ; . ; . ;	upstream_gene_variant ; ldlJ ; n.-2089A>C ; . ; . ; . ; . ;	upstream_gene_variant ; rplJ ; c.-2295A>C ; . ; . ; . ; . ;
NC_000964.3	117813	C	G	225	hom	158	158	.	.	.	.	.	.	upstream_gene_variant ; nusG ; c.-77C>G ; . ; . ; . ; . ;	upstream_gene_variant ; rplK ; c.-778C>G ; . ; . ; . ; . ;	upstream_gene_variant ; rplA ; c.-1298C>G ; . ; . ; . ; . ;	upstream_gene_variant ; ldlJ ; n.-2042C>G ; . ; . ; . ; . ;	upstream_gene_variant ; rplJ ; c.-2248C>G ; . ; . ; . ; . ;
NC_000964.3	117961	G	A	225	hom	276	276	nusG	gene-BSU_01010	117890	118423	+	synonymous_variant ; nusG ; c.72G>A ; p.Lys24Lys ; 72/534 ; 72/534 ; 24/177 ;	synonymous_variant ; nusG ; c.72G>A ; p.Lys24Lys ; 72/534 ; 72/534 ; 24/177 ;	upstream_gene_variant ; rplK ; c.-630G>A ; . ; . ; . ; . ;	upstream_gene_variant ; rplA ; c.-1150G>A ; . ; . ; . ; . ;	upstream_gene_variant ; ldlJ ; n.-1894G>A ; . ; . ; . ; . ;	upstream_gene_variant ; rplJ ; c.-2100G>A ; . ; . ; . ; . ;
NC_000964.3	118027	G	A	225	hom	317	317	nusG	gene-BSU_01010	117890	118423	+	synonymous_variant ; nusG ; c.138G>A ; p.Thr46Thr ; 138/534 ; 138/534 ; 46/177 ;	synonymous_variant ; nusG ; c.138G>A ; p.Thr46Thr ; 138/534 ; 138/534 ; 46/177 ;	upstream_gene_variant ; rplK ; c.-564G>A ; . ; . ; . ; . ;	upstream_gene_variant ; rplA ; c.-1084G>A ; . ; . ; . ; . ;	upstream_gene_variant ; ldlJ ; n.-1828G>A ; . ; . ; . ; . ;	upstream_gene_variant ; rplJ ; c.-2034G>A ; . ; . ; . ; . ;
NC_000964.3	118123	C	T	225	hom	298	298	nusG	gene-BSU_01010	117890	118423	+	synonymous_variant ; nusG ; c.234C>T ; p.Val78Val ; 234/534 ; 234/534 ; 78/177 ;	synonymous_variant ; nusG ; c.234C>T ; p.Val78Val ; 234/534 ; 234/534 ; 78/177 ;	upstream_gene_variant ; rplK ; c.-468C>T ; . ; . ; . ; . ;	upstream_gene_variant ; rplA ; c.-988C>T ; . ; . ; . ; . ;	upstream_gene_variant ; ldlJ ; n.-1732C>T ; . ; . ; . ; . ;	upstream_gene_variant ; rplJ ; c.-1938C>T ; . ; . ; . ; . ;
NC_000964.3	118201	G	C	225	hom	249	249	nusG	gene-BSU_01010	117890	118423	+	synonymous_variant ; nusG ; c.312G>C ; p.Gly104Gly ; 312/534 ; 312/534 ; 104/177 ;	synonymous_variant ; nusG ; c.312G>C ; p.Gly104Gly ; 312/534 ; 312/534 ; 104/177 ;	upstream_gene_variant ; rplK ; c.-390G>C ; . ; . ; . ; . ;	upstream_gene_variant ; rplA ; c.-910G>C ; . ; . ; . ; . ;	upstream_gene_variant ; ldlJ ; n.-1654G>C ; . ; . ; . ; . ;	upstream_gene_variant ; rplJ ; c.-1860G>C ; . ; . ; . ; . ;
NC_000964.3	118414	T	C	225	hom	194	194	nusG	gene-BSU_01010	117890	118423	+	synonymous_variant ; nusG ; c.525T>C ; p.Asp175Asp ; 525/534 ; 525/534 ; 175/177 ;	synonymous_variant ; nusG ; c.525T>C ; p.Asp175Asp ; 525/534 ; 525/534 ; 175/177 ;	upstream_gene_variant ; rplK ; c.-177T>C ; . ; . ; . ; . ;	upstream_gene_variant ; rplA ; c.-697T>C ; . ; . ; . ; . ;	upstream_gene_variant ; ldlJ ; n.-1441T>C ; . ; . ; . ; . ;	upstream_gene_variant ; rplJ ; c.-1647T>C ; . ; . ; . ; . ;
NC_000964.3	118452	A	T	225	hom	214	214	.	.	.	.	.	.	upstream_gene_variant ; rplK ; c.-139A>T ; . ; . ; . ; . ;	upstream_gene_variant ; rplA ; c.-659A>T ; . ; . ; . ; . ;	upstream_gene_variant ; ldlJ ; n.-1403A>T ; . ; . ; . ; . ;	upstream_gene_variant ; rplJ ; c.-1609A>T ; . ; . ; . ; . ;	upstream_gene_variant ; rplL ; c.-2155A>T ; . ; . ; . ; . ;
NC_000964.3	119302	G	T	225	hom	150	150	rplA	gene-BSU_01030	119111	119809	+	synonymous_variant ; rplA ; c.192G>T ; p.Val64Val ; 192/699 ; 192/699 ; 64/232 ;	synonymous_variant ; rplA ; c.192G>T ; p.Val64Val ; 192/699 ; 192/699 ; 64/232 ;	upstream_gene_variant ; ldlJ ; n.-553G>T ; . ; . ; . ; . ;	upstream_gene_variant ; rplJ ; c.-759G>T ; . ; . ; . ; . ;	upstream_gene_variant ; rplL ; c.-1305G>T ; . ; . ; . ; . ;	upstream_gene_variant ; rlmG ; c.-1766G>T ; . ; . ; . ; . ;
NC_000964.3	119524	G	A	225	hom	191	191	rplA	gene-BSU_01030	119111	119809	+	synonymous_variant ; rplA ; c.414G>A ; p.Pro138Pro ; 414/699 ; 414/699 ; 138/232 ;	synonymous_variant ; rplA ; c.414G>A ; p.Pro138Pro ; 414/699 ; 414/699 ; 138/232 ;	upstream_gene_variant ; ldlJ ; n.-331G>A ; . ; . ; . ; . ;	upstream_gene_variant ; rplJ ; c.-537G>A ; . ; . ; . ; . ;	upstream_gene_variant ; rplL ; c.-1083G>A ; . ; . ; . ; . ;	upstream_gene_variant ; rlmG ; c.-1544G>A ; . ; . ; . ; . ;
NC_000964.3	119566	T	G	225	hom	199	199	rplA	gene-BSU_01030	119111	119809	+	synonymous_variant ; rplA ; c.456T>G ; p.Ala152Ala ; 456/699 ; 456/699 ; 152/232 ;	synonymous_variant ; rplA ; c.456T>G ; p.Ala152Ala ; 456/699 ; 456/699 ; 152/232 ;	upstream_gene_variant ; ldlJ ; n.-289T>G ; . ; . ; . ; . ;	upstream_gene_variant ; rplJ ; c.-495T>G ; . ; . ; . ; . ;	upstream_gene_variant ; rplL ; c.-1041T>G ; . ; . ; . ; . ;	upstream_gene_variant ; rlmG ; c.-1502T>G ; . ; . ; . ; . ;
NC_000964.3	119602	C	T	225	hom	199	199	rplA	gene-BSU_01030	119111	119809	+	synonymous_variant ; rplA ; c.492C>T ; p.Arg164Arg ; 492/699 ; 492/699 ; 164/232 ;	synonymous_variant ; rplA ; c.492C>T ; p.Arg164Arg ; 492/699 ; 492/699 ; 164/232 ;	upstream_gene_variant ; ldlJ ; n.-253C>T ; . ; . ; . ; . ;	upstream_gene_variant ; rplJ ; c.-459C>T ; . ; . ; . ; . ;	upstream_gene_variant ; rplL ; c.-1005C>T ; . ; . ; . ; . ;	upstream_gene_variant ; rlmG ; c.-1466C>T ; . ; . ; . ; . ;
NC_000964.3	119743	C	T	225	hom	236	236	rplA	gene-BSU_01030	119111	119809	+	synonymous_variant ; rplA ; c.633C>T ; p.Asn211Asn ; 633/699 ; 633/699 ; 211/232 ;	synonymous_variant ; rplA ; c.633C>T ; p.Asn211Asn ; 633/699 ; 633/699 ; 211/232 ;	upstream_gene_variant ; ldlJ ; n.-112C>T ; . ; . ; . ; . ;	upstream_gene_variant ; rplJ ; c.-318C>T ; . ; . ; . ; . ;	upstream_gene_variant ; rplL ; c.-864C>T ; . ; . ; . ; . ;	upstream_gene_variant ; rlmG ; c.-1325C>T ; . ; . ; . ; . ;
NC_000964.3	120870	G	A	225	hom	258	258	rplL	gene-BSU_01050	120607	120978	+	synonymous_variant ; rplL ; c.264G>A ; p.Glu88Glu ; 264/372 ; 264/372 ; 88/123 ;	synonymous_variant ; rplL ; c.264G>A ; p.Glu88Glu ; 264/372 ; 264/372 ; 88/123 ;	upstream_gene_variant ; rlmG ; c.-198G>A ; . ; . ; . ; . ;	upstream_gene_variant ; rpoB ; c.-1049G>A ; . ; . ; . ; . ;	upstream_gene_variant ; rpoC ; c.-4692G>A ; . ; . ; . ; . ;	downstream_gene_variant ; rlmB ; c.*4852G>A ; . ; . ; . ; . ;
NC_000964.3	121256	A	G	225	hom	71	71	rlmG	gene-BSU_01060	121068	121673	+	synonymous_variant ; rlmG ; c.189A>G ; p.Leu63Leu ; 189/606 ; 189/606 ; 63/201 ;	synonymous_variant ; rlmG ; c.189A>G ; p.Leu63Leu ; 189/606 ; 189/606 ; 63/201 ;	upstream_gene_variant ; rpoB ; c.-663A>G ; . ; . ; . ; . ;	upstream_gene_variant ; rpoC ; c.-4306A>G ; . ; . ; . ; . ;	downstream_gene_variant ; raeA ; c.*4719A>G ; . ; . ; . ; . ;	downstream_gene_variant ; sigH ; c.*4000A>G ; . ; . ; . ; . ;
NC_000964.3	121271	A	G	225	hom	74	74	rlmG	gene-BSU_01060	121068	121673	+	synonymous_variant ; rlmG ; c.204A>G ; p.Gly68Gly ; 204/606 ; 204/606 ; 68/201 ;	synonymous_variant ; rlmG ; c.204A>G ; p.Gly68Gly ; 204/606 ; 204/606 ; 68/201 ;	upstream_gene_variant ; rpoB ; c.-648A>G ; . ; . ; . ; . ;	upstream_gene_variant ; rpoC ; c.-4291A>G ; . ; . ; . ; . ;	downstream_gene_variant ; raeA ; c.*4734A>G ; . ; . ; . ; . ;	downstream_gene_variant ; sigH ; c.*4015A>G ; . ; . ; . ; . ;
NC_000964.3	121319	C	T	225	hom	79	79	rlmG	gene-BSU_01060	121068	121673	+	synonymous_variant ; rlmG ; c.252C>T ; p.Thr84Thr ; 252/606 ; 252/606 ; 84/201 ;	synonymous_variant ; rlmG ; c.252C>T ; p.Thr84Thr ; 252/606 ; 252/606 ; 84/201 ;	upstream_gene_variant ; rpoB ; c.-600C>T ; . ; . ; . ; . ;	upstream_gene_variant ; rpoC ; c.-4243C>T ; . ; . ; . ; . ;	downstream_gene_variant ; raeA ; c.*4782C>T ; . ; . ; . ; . ;	downstream_gene_variant ; sigH ; c.*4063C>T ; . ; . ; . ; . ;
NC_000964.3	122605	C	T	225	hom	227	227	rpoB	gene-BSU_01070	121919	125500	+	synonymous_variant ; rpoB ; c.687C>T ; p.Ser229Ser ; 687/3582 ; 687/3582 ; 229/1193 ;	synonymous_variant ; rpoB ; c.687C>T ; p.Ser229Ser ; 687/3582 ; 687/3582 ; 229/1193 ;	upstream_gene_variant ; rpoC ; c.-2957C>T ; . ; . ; . ; . ;	downstream_gene_variant ; secE ; c.*4894C>T ; . ; . ; . ; . ;	downstream_gene_variant ; nusG ; c.*4182C>T ; . ; . ; . ; . ;	downstream_gene_variant ; rplK ; c.*3589C>T ; . ; . ; . ; . ;
NC_000964.3	122860	G	A	225	hom	184	184	rpoB	gene-BSU_01070	121919	125500	+	synonymous_variant ; rpoB ; c.942G>A ; p.Thr314Thr ; 942/3582 ; 942/3582 ; 314/1193 ;	synonymous_variant ; rpoB ; c.942G>A ; p.Thr314Thr ; 942/3582 ; 942/3582 ; 314/1193 ;	upstream_gene_variant ; rpoC ; c.-2702G>A ; . ; . ; . ; . ;	downstream_gene_variant ; nusG ; c.*4437G>A ; . ; . ; . ; . ;	downstream_gene_variant ; rplK ; c.*3844G>A ; . ; . ; . ; . ;	downstream_gene_variant ; rplA ; c.*3051G>A ; . ; . ; . ; . ;
NC_000964.3	123001	C	T	228	hom	173	172	rpoB	gene-BSU_01070	121919	125500	+	synonymous_variant ; rpoB ; c.1083C>T ; p.Ile361Ile ; 1083/3582 ; 1083/3582 ; 361/1193 ;	synonymous_variant ; rpoB ; c.1083C>T ; p.Ile361Ile ; 1083/3582 ; 1083/3582 ; 361/1193 ;	upstream_gene_variant ; rpoC ; c.-2561C>T ; . ; . ; . ; . ;	downstream_gene_variant ; nusG ; c.*4578C>T ; . ; . ; . ; . ;	downstream_gene_variant ; rplK ; c.*3985C>T ; . ; . ; . ; . ;	downstream_gene_variant ; rplA ; c.*3192C>T ; . ; . ; . ; . ;
NC_000964.3	123089	C	T	225	hom	203	203	rpoB	gene-BSU_01070	121919	125500	+	synonymous_variant ; rpoB ; c.1171C>T ; p.Leu391Leu ; 1171/3582 ; 1171/3582 ; 391/1193 ;	synonymous_variant ; rpoB ; c.1171C>T ; p.Leu391Leu ; 1171/3582 ; 1171/3582 ; 391/1193 ;	upstream_gene_variant ; rpoC ; c.-2473C>T ; . ; . ; . ; . ;	downstream_gene_variant ; nusG ; c.*4666C>T ; . ; . ; . ; . ;	downstream_gene_variant ; rplK ; c.*4073C>T ; . ; . ; . ; . ;	downstream_gene_variant ; rplA ; c.*3280C>T ; . ; . ; . ; . ;
NC_000964.3	123109	C	T	225	hom	214	214	rpoB	gene-BSU_01070	121919	125500	+	synonymous_variant ; rpoB ; c.1191C>T ; p.Asp397Asp ; 1191/3582 ; 1191/3582 ; 397/1193 ;	synonymous_variant ; rpoB ; c.1191C>T ; p.Asp397Asp ; 1191/3582 ; 1191/3582 ; 397/1193 ;	upstream_gene_variant ; rpoC ; c.-2453C>T ; . ; . ; . ; . ;	downstream_gene_variant ; nusG ; c.*4686C>T ; . ; . ; . ; . ;	downstream_gene_variant ; rplK ; c.*4093C>T ; . ; . ; . ; . ;	downstream_gene_variant ; rplA ; c.*3300C>T ; . ; . ; . ; . ;
NC_000964.3	123148	T	C	225	hom	231	231	rpoB	gene-BSU_01070	121919	125500	+	synonymous_variant ; rpoB ; c.1230T>C ; p.Arg410Arg ; 1230/3582 ; 1230/3582 ; 410/1193 ;	synonymous_variant ; rpoB ; c.1230T>C ; p.Arg410Arg ; 1230/3582 ; 1230/3582 ; 410/1193 ;	upstream_gene_variant ; rpoC ; c.-2414T>C ; . ; . ; . ; . ;	downstream_gene_variant ; nusG ; c.*4725T>C ; . ; . ; . ; . ;	downstream_gene_variant ; rplK ; c.*4132T>C ; . ; . ; . ; . ;	downstream_gene_variant ; rplA ; c.*3339T>C ; . ; . ; . ; . ;
NC_000964.3	123181	T	A	225	hom	235	235	rpoB	gene-BSU_01070	121919	125500	+	synonymous_variant ; rpoB ; c.1263T>A ; p.Arg421Arg ; 1263/3582 ; 1263/3582 ; 421/1193 ;	synonymous_variant ; rpoB ; c.1263T>A ; p.Arg421Arg ; 1263/3582 ; 1263/3582 ; 421/1193 ;	upstream_gene_variant ; rpoC ; c.-2381T>A ; . ; . ; . ; . ;	downstream_gene_variant ; nusG ; c.*4758T>A ; . ; . ; . ; . ;	downstream_gene_variant ; rplK ; c.*4165T>A ; . ; . ; . ; . ;	downstream_gene_variant ; rplA ; c.*3372T>A ; . ; . ; . ; . ;
NC_000964.3	123721	C	T	225	hom	349	349	rpoB	gene-BSU_01070	121919	125500	+	synonymous_variant ; rpoB ; c.1803C>T ; p.Thr601Thr ; 1803/3582 ; 1803/3582 ; 601/1193 ;	synonymous_variant ; rpoB ; c.1803C>T ; p.Thr601Thr ; 1803/3582 ; 1803/3582 ; 601/1193 ;	upstream_gene_variant ; rpoC ; c.-1841C>T ; . ; . ; . ; . ;	downstream_gene_variant ; rplK ; c.*4705C>T ; . ; . ; . ; . ;	downstream_gene_variant ; rplA ; c.*3912C>T ; . ; . ; . ; . ;	downstream_gene_variant ; ldlJ ; n.*3726C>T ; . ; . ; . ; . ;
NC_000964.3	123736	T	C	225	hom	365	365	rpoB	gene-BSU_01070	121919	125500	+	synonymous_variant ; rpoB ; c.1818T>C ; p.Asn606Asn ; 1818/3582 ; 1818/3582 ; 606/1193 ;	synonymous_variant ; rpoB ; c.1818T>C ; p.Asn606Asn ; 1818/3582 ; 1818/3582 ; 606/1193 ;	upstream_gene_variant ; rpoC ; c.-1826T>C ; . ; . ; . ; . ;	downstream_gene_variant ; rplK ; c.*4720T>C ; . ; . ; . ; . ;	downstream_gene_variant ; rplA ; c.*3927T>C ; . ; . ; . ; . ;	downstream_gene_variant ; ldlJ ; n.*3741T>C ; . ; . ; . ; . ;
NC_000964.3	123979	C	G	225	hom	425	425	rpoB	gene-BSU_01070	121919	125500	+	synonymous_variant ; rpoB ; c.2061C>G ; p.Ala687Ala ; 2061/3582 ; 2061/3582 ; 687/1193 ;	synonymous_variant ; rpoB ; c.2061C>G ; p.Ala687Ala ; 2061/3582 ; 2061/3582 ; 687/1193 ;	upstream_gene_variant ; rpoC ; c.-1583C>G ; . ; . ; . ; . ;	downstream_gene_variant ; rplK ; c.*4963C>G ; . ; . ; . ; . ;	downstream_gene_variant ; rplA ; c.*4170C>G ; . ; . ; . ; . ;	downstream_gene_variant ; ldlJ ; n.*3984C>G ; . ; . ; . ; . ;
NC_000964.3	124213	G	A	225	hom	450	450	rpoB	gene-BSU_01070	121919	125500	+	synonymous_variant ; rpoB ; c.2295G>A ; p.Thr765Thr ; 2295/3582 ; 2295/3582 ; 765/1193 ;	synonymous_variant ; rpoB ; c.2295G>A ; p.Thr765Thr ; 2295/3582 ; 2295/3582 ; 765/1193 ;	upstream_gene_variant ; rpoC ; c.-1349G>A ; . ; . ; . ; . ;	downstream_gene_variant ; rplA ; c.*4404G>A ; . ; . ; . ; . ;	downstream_gene_variant ; ldlJ ; n.*4218G>A ; . ; . ; . ; . ;	downstream_gene_variant ; rplJ ; c.*3652G>A ; . ; . ; . ; . ;
NC_000964.3	124486	C	A	225	hom	226	226	rpoB	gene-BSU_01070	121919	125500	+	synonymous_variant ; rpoB ; c.2568C>A ; p.Ala856Ala ; 2568/3582 ; 2568/3582 ; 856/1193 ;	synonymous_variant ; rpoB ; c.2568C>A ; p.Ala856Ala ; 2568/3582 ; 2568/3582 ; 856/1193 ;	upstream_gene_variant ; rpoC ; c.-1076C>A ; . ; . ; . ; . ;	upstream_gene_variant ; rulS ; c.-4854C>A ; . ; . ; . ; . ;	downstream_gene_variant ; rplA ; c.*4677C>A ; . ; . ; . ; . ;	downstream_gene_variant ; ldlJ ; n.*4491C>A ; . ; . ; . ; . ;
NC_000964.3	124510	C	T	225	hom	216	216	rpoB	gene-BSU_01070	121919	125500	+	synonymous_variant ; rpoB ; c.2592C>T ; p.Ile864Ile ; 2592/3582 ; 2592/3582 ; 864/1193 ;	synonymous_variant ; rpoB ; c.2592C>T ; p.Ile864Ile ; 2592/3582 ; 2592/3582 ; 864/1193 ;	upstream_gene_variant ; rpoC ; c.-1052C>T ; . ; . ; . ; . ;	upstream_gene_variant ; rulS ; c.-4830C>T ; . ; . ; . ; . ;	downstream_gene_variant ; rplA ; c.*4701C>T ; . ; . ; . ; . ;	downstream_gene_variant ; ldlJ ; n.*4515C>T ; . ; . ; . ; . ;
NC_000964.3	124561	T	C	225	hom	202	202	rpoB	gene-BSU_01070	121919	125500	+	synonymous_variant ; rpoB ; c.2643T>C ; p.His881His ; 2643/3582 ; 2643/3582 ; 881/1193 ;	synonymous_variant ; rpoB ; c.2643T>C ; p.His881His ; 2643/3582 ; 2643/3582 ; 881/1193 ;	upstream_gene_variant ; rpoC ; c.-1001T>C ; . ; . ; . ; . ;	upstream_gene_variant ; rulS ; c.-4779T>C ; . ; . ; . ; . ;	downstream_gene_variant ; rplA ; c.*4752T>C ; . ; . ; . ; . ;	downstream_gene_variant ; ldlJ ; n.*4566T>C ; . ; . ; . ; . ;
NC_000964.3	125038	G	A	225	hom	349	349	rpoB	gene-BSU_01070	121919	125500	+	synonymous_variant ; rpoB ; c.3120G>A ; p.Leu1040Leu ; 3120/3582 ; 3120/3582 ; 1040/1193 ;	synonymous_variant ; rpoB ; c.3120G>A ; p.Leu1040Leu ; 3120/3582 ; 3120/3582 ; 1040/1193 ;	upstream_gene_variant ; rpoC ; c.-524G>A ; . ; . ; . ; . ;	upstream_gene_variant ; rulS ; c.-4302G>A ; . ; . ; . ; . ;	upstream_gene_variant ; rpsL ; c.-4664G>A ; . ; . ; . ; . ;	downstream_gene_variant ; rplJ ; c.*4477G>A ; . ; . ; . ; . ;
NC_000964.3	125080	C	T	225	hom	328	328	rpoB	gene-BSU_01070	121919	125500	+	synonymous_variant ; rpoB ; c.3162C>T ; p.Gly1054Gly ; 3162/3582 ; 3162/3582 ; 1054/1193 ;	synonymous_variant ; rpoB ; c.3162C>T ; p.Gly1054Gly ; 3162/3582 ; 3162/3582 ; 1054/1193 ;	upstream_gene_variant ; rpoC ; c.-482C>T ; . ; . ; . ; . ;	upstream_gene_variant ; rulS ; c.-4260C>T ; . ; . ; . ; . ;	upstream_gene_variant ; rpsL ; c.-4622C>T ; . ; . ; . ; . ;	downstream_gene_variant ; rplJ ; c.*4519C>T ; . ; . ; . ; . ;
NC_000964.3	125188	C	T	225	hom	263	263	rpoB	gene-BSU_01070	121919	125500	+	synonymous_variant ; rpoB ; c.3270C>T ; p.Tyr1090Tyr ; 3270/3582 ; 3270/3582 ; 1090/1193 ;	synonymous_variant ; rpoB ; c.3270C>T ; p.Tyr1090Tyr ; 3270/3582 ; 3270/3582 ; 1090/1193 ;	upstream_gene_variant ; rpoC ; c.-374C>T ; . ; . ; . ; . ;	upstream_gene_variant ; rulS ; c.-4152C>T ; . ; . ; . ; . ;	upstream_gene_variant ; rpsL ; c.-4514C>T ; . ; . ; . ; . ;	upstream_gene_variant ; rpsG ; c.-4972C>T ; . ; . ; . ; . ;
NC_000964.3	125406	C	T	225	hom	338	338	rpoB	gene-BSU_01070	121919	125500	+	missense_variant ; rpoB ; c.3488C>T ; p.Ala1163Val ; 3488/3582 ; 3488/3582 ; 1163/1193 ;	missense_variant ; rpoB ; c.3488C>T ; p.Ala1163Val ; 3488/3582 ; 3488/3582 ; 1163/1193 ;	upstream_gene_variant ; rpoC ; c.-156C>T ; . ; . ; . ; . ;	upstream_gene_variant ; rulS ; c.-3934C>T ; . ; . ; . ; . ;	upstream_gene_variant ; rpsL ; c.-4296C>T ; . ; . ; . ; . ;	upstream_gene_variant ; rpsG ; c.-4754C>T ; . ; . ; . ; . ;
NC_000964.3	125723	G	T	225	hom	217	217	rpoC	gene-BSU_01080	125562	129161	+	synonymous_variant ; rpoC ; c.162G>T ; p.Pro54Pro ; 162/3600 ; 162/3600 ; 54/1199 ;	synonymous_variant ; rpoC ; c.162G>T ; p.Pro54Pro ; 162/3600 ; 162/3600 ; 54/1199 ;	upstream_gene_variant ; rulS ; c.-3617G>T ; . ; . ; . ; . ;	upstream_gene_variant ; rpsL ; c.-3979G>T ; . ; . ; . ; . ;	upstream_gene_variant ; rpsG ; c.-4437G>T ; . ; . ; . ; . ;	upstream_gene_variant ; fusA ; c.-4961G>T ; . ; . ; . ; . ;
NC_000964.3	126116	A	C	225	hom	143	143	rpoC	gene-BSU_01080	125562	129161	+	synonymous_variant ; rpoC ; c.555A>C ; p.Val185Val ; 555/3600 ; 555/3600 ; 185/1199 ;	synonymous_variant ; rpoC ; c.555A>C ; p.Val185Val ; 555/3600 ; 555/3600 ; 185/1199 ;	upstream_gene_variant ; rulS ; c.-3224A>C ; . ; . ; . ; . ;	upstream_gene_variant ; rpsL ; c.-3586A>C ; . ; . ; . ; . ;	upstream_gene_variant ; rpsG ; c.-4044A>C ; . ; . ; . ; . ;	upstream_gene_variant ; fusA ; c.-4568A>C ; . ; . ; . ; . ;
NC_000964.3	126167	C	A	225	hom	135	135	rpoC	gene-BSU_01080	125562	129161	+	synonymous_variant ; rpoC ; c.606C>A ; p.Arg202Arg ; 606/3600 ; 606/3600 ; 202/1199 ;	synonymous_variant ; rpoC ; c.606C>A ; p.Arg202Arg ; 606/3600 ; 606/3600 ; 202/1199 ;	upstream_gene_variant ; rulS ; c.-3173C>A ; . ; . ; . ; . ;	upstream_gene_variant ; rpsL ; c.-3535C>A ; . ; . ; . ; . ;	upstream_gene_variant ; rpsG ; c.-3993C>A ; . ; . ; . ; . ;	upstream_gene_variant ; fusA ; c.-4517C>A ; . ; . ; . ; . ;
NC_000964.3	126389	G	A	225	hom	138	138	rpoC	gene-BSU_01080	125562	129161	+	synonymous_variant ; rpoC ; c.828G>A ; p.Ala276Ala ; 828/3600 ; 828/3600 ; 276/1199 ;	synonymous_variant ; rpoC ; c.828G>A ; p.Ala276Ala ; 828/3600 ; 828/3600 ; 276/1199 ;	upstream_gene_variant ; rulS ; c.-2951G>A ; . ; . ; . ; . ;	upstream_gene_variant ; rpsL ; c.-3313G>A ; . ; . ; . ; . ;	upstream_gene_variant ; rpsG ; c.-3771G>A ; . ; . ; . ; . ;	upstream_gene_variant ; fusA ; c.-4295G>A ; . ; . ; . ; . ;
NC_000964.3	126401	C	T	225	hom	142	142	rpoC	gene-BSU_01080	125562	129161	+	synonymous_variant ; rpoC ; c.840C>T ; p.Ile280Ile ; 840/3600 ; 840/3600 ; 280/1199 ;	synonymous_variant ; rpoC ; c.840C>T ; p.Ile280Ile ; 840/3600 ; 840/3600 ; 280/1199 ;	upstream_gene_variant ; rulS ; c.-2939C>T ; . ; . ; . ; . ;	upstream_gene_variant ; rpsL ; c.-3301C>T ; . ; . ; . ; . ;	upstream_gene_variant ; rpsG ; c.-3759C>T ; . ; . ; . ; . ;	upstream_gene_variant ; fusA ; c.-4283C>T ; . ; . ; . ; . ;
NC_000964.3	126444	C	T	225	hom	152	152	rpoC	gene-BSU_01080	125562	129161	+	synonymous_variant ; rpoC ; c.883C>T ; p.Leu295Leu ; 883/3600 ; 883/3600 ; 295/1199 ;	synonymous_variant ; rpoC ; c.883C>T ; p.Leu295Leu ; 883/3600 ; 883/3600 ; 295/1199 ;	upstream_gene_variant ; rulS ; c.-2896C>T ; . ; . ; . ; . ;	upstream_gene_variant ; rpsL ; c.-3258C>T ; . ; . ; . ; . ;	upstream_gene_variant ; rpsG ; c.-3716C>T ; . ; . ; . ; . ;	upstream_gene_variant ; fusA ; c.-4240C>T ; . ; . ; . ; . ;
NC_000964.3	126482	T	C	225	hom	168	168	rpoC	gene-BSU_01080	125562	129161	+	synonymous_variant ; rpoC ; c.921T>C ; p.Gly307Gly ; 921/3600 ; 921/3600 ; 307/1199 ;	synonymous_variant ; rpoC ; c.921T>C ; p.Gly307Gly ; 921/3600 ; 921/3600 ; 307/1199 ;	upstream_gene_variant ; rulS ; c.-2858T>C ; . ; . ; . ; . ;	upstream_gene_variant ; rpsL ; c.-3220T>C ; . ; . ; . ; . ;	upstream_gene_variant ; rpsG ; c.-3678T>C ; . ; . ; . ; . ;	upstream_gene_variant ; fusA ; c.-4202T>C ; . ; . ; . ; . ;
NC_000964.3	126488	A	T	225	hom	168	168	rpoC	gene-BSU_01080	125562	129161	+	synonymous_variant ; rpoC ; c.927A>T ; p.Gly309Gly ; 927/3600 ; 927/3600 ; 309/1199 ;	synonymous_variant ; rpoC ; c.927A>T ; p.Gly309Gly ; 927/3600 ; 927/3600 ; 309/1199 ;	upstream_gene_variant ; rulS ; c.-2852A>T ; . ; . ; . ; . ;	upstream_gene_variant ; rpsL ; c.-3214A>T ; . ; . ; . ; . ;	upstream_gene_variant ; rpsG ; c.-3672A>T ; . ; . ; . ; . ;	upstream_gene_variant ; fusA ; c.-4196A>T ; . ; . ; . ; . ;
NC_000964.3	126647	A	G	228	hom	137	136	rpoC	gene-BSU_01080	125562	129161	+	synonymous_variant ; rpoC ; c.1086A>G ; p.Ala362Ala ; 1086/3600 ; 1086/3600 ; 362/1199 ;	synonymous_variant ; rpoC ; c.1086A>G ; p.Ala362Ala ; 1086/3600 ; 1086/3600 ; 362/1199 ;	upstream_gene_variant ; rulS ; c.-2693A>G ; . ; . ; . ; . ;	upstream_gene_variant ; rpsL ; c.-3055A>G ; . ; . ; . ; . ;	upstream_gene_variant ; rpsG ; c.-3513A>G ; . ; . ; . ; . ;	upstream_gene_variant ; fusA ; c.-4037A>G ; . ; . ; . ; . ;
NC_000964.3	126975	T	C	225	hom	407	407	rpoC	gene-BSU_01080	125562	129161	+	synonymous_variant ; rpoC ; c.1414T>C ; p.Leu472Leu ; 1414/3600 ; 1414/3600 ; 472/1199 ;	synonymous_variant ; rpoC ; c.1414T>C ; p.Leu472Leu ; 1414/3600 ; 1414/3600 ; 472/1199 ;	upstream_gene_variant ; rulS ; c.-2365T>C ; . ; . ; . ; . ;	upstream_gene_variant ; rpsL ; c.-2727T>C ; . ; . ; . ; . ;	upstream_gene_variant ; rpsG ; c.-3185T>C ; . ; . ; . ; . ;	upstream_gene_variant ; fusA ; c.-3709T>C ; . ; . ; . ; . ;
NC_000964.3	127148	A	G	225	hom	272	272	rpoC	gene-BSU_01080	125562	129161	+	synonymous_variant ; rpoC ; c.1587A>G ; p.Gly529Gly ; 1587/3600 ; 1587/3600 ; 529/1199 ;	synonymous_variant ; rpoC ; c.1587A>G ; p.Gly529Gly ; 1587/3600 ; 1587/3600 ; 529/1199 ;	upstream_gene_variant ; rulS ; c.-2192A>G ; . ; . ; . ; . ;	upstream_gene_variant ; rpsL ; c.-2554A>G ; . ; . ; . ; . ;	upstream_gene_variant ; rpsG ; c.-3012A>G ; . ; . ; . ; . ;	upstream_gene_variant ; fusA ; c.-3536A>G ; . ; . ; . ; . ;
NC_000964.3	127364	T	C	225	hom	136	136	rpoC	gene-BSU_01080	125562	129161	+	synonymous_variant ; rpoC ; c.1803T>C ; p.Asp601Asp ; 1803/3600 ; 1803/3600 ; 601/1199 ;	synonymous_variant ; rpoC ; c.1803T>C ; p.Asp601Asp ; 1803/3600 ; 1803/3600 ; 601/1199 ;	upstream_gene_variant ; rulS ; c.-1976T>C ; . ; . ; . ; . ;	upstream_gene_variant ; rpsL ; c.-2338T>C ; . ; . ; . ; . ;	upstream_gene_variant ; rpsG ; c.-2796T>C ; . ; . ; . ; . ;	upstream_gene_variant ; fusA ; c.-3320T>C ; . ; . ; . ; . ;
NC_000964.3	127619	A	G	225	hom	244	244	rpoC	gene-BSU_01080	125562	129161	+	synonymous_variant ; rpoC ; c.2058A>G ; p.Gln686Gln ; 2058/3600 ; 2058/3600 ; 686/1199 ;	synonymous_variant ; rpoC ; c.2058A>G ; p.Gln686Gln ; 2058/3600 ; 2058/3600 ; 686/1199 ;	upstream_gene_variant ; rulS ; c.-1721A>G ; . ; . ; . ; . ;	upstream_gene_variant ; rpsL ; c.-2083A>G ; . ; . ; . ; . ;	upstream_gene_variant ; rpsG ; c.-2541A>G ; . ; . ; . ; . ;	upstream_gene_variant ; fusA ; c.-3065A>G ; . ; . ; . ; . ;
NC_000964.3	127985	T	G	225	hom	311	311	rpoC	gene-BSU_01080	125562	129161	+	synonymous_variant ; rpoC ; c.2424T>G ; p.Ala808Ala ; 2424/3600 ; 2424/3600 ; 808/1199 ;	synonymous_variant ; rpoC ; c.2424T>G ; p.Ala808Ala ; 2424/3600 ; 2424/3600 ; 808/1199 ;	upstream_gene_variant ; rulS ; c.-1355T>G ; . ; . ; . ; . ;	upstream_gene_variant ; rpsL ; c.-1717T>G ; . ; . ; . ; . ;	upstream_gene_variant ; rpsG ; c.-2175T>G ; . ; . ; . ; . ;	upstream_gene_variant ; fusA ; c.-2699T>G ; . ; . ; . ; . ;
NC_000964.3	128000	C	T	225	hom	313	313	rpoC	gene-BSU_01080	125562	129161	+	synonymous_variant ; rpoC ; c.2439C>T ; p.Ile813Ile ; 2439/3600 ; 2439/3600 ; 813/1199 ;	synonymous_variant ; rpoC ; c.2439C>T ; p.Ile813Ile ; 2439/3600 ; 2439/3600 ; 813/1199 ;	upstream_gene_variant ; rulS ; c.-1340C>T ; . ; . ; . ; . ;	upstream_gene_variant ; rpsL ; c.-1702C>T ; . ; . ; . ; . ;	upstream_gene_variant ; rpsG ; c.-2160C>T ; . ; . ; . ; . ;	upstream_gene_variant ; fusA ; c.-2684C>T ; . ; . ; . ; . ;
NC_000964.3	128165	C	T	225	hom	370	370	rpoC	gene-BSU_01080	125562	129161	+	synonymous_variant ; rpoC ; c.2604C>T ; p.Ile868Ile ; 2604/3600 ; 2604/3600 ; 868/1199 ;	synonymous_variant ; rpoC ; c.2604C>T ; p.Ile868Ile ; 2604/3600 ; 2604/3600 ; 868/1199 ;	upstream_gene_variant ; rulS ; c.-1175C>T ; . ; . ; . ; . ;	upstream_gene_variant ; rpsL ; c.-1537C>T ; . ; . ; . ; . ;	upstream_gene_variant ; rpsG ; c.-1995C>T ; . ; . ; . ; . ;	upstream_gene_variant ; fusA ; c.-2519C>T ; . ; . ; . ; . ;
NC_000964.3	128801	G	A	225	hom	256	256	rpoC	gene-BSU_01080	125562	129161	+	synonymous_variant ; rpoC ; c.3240G>A ; p.Val1080Val ; 3240/3600 ; 3240/3600 ; 1080/1199 ;	synonymous_variant ; rpoC ; c.3240G>A ; p.Val1080Val ; 3240/3600 ; 3240/3600 ; 1080/1199 ;	upstream_gene_variant ; rulS ; c.-539G>A ; . ; . ; . ; . ;	upstream_gene_variant ; rpsL ; c.-901G>A ; . ; . ; . ; . ;	upstream_gene_variant ; rpsG ; c.-1359G>A ; . ; . ; . ; . ;	upstream_gene_variant ; fusA ; c.-1883G>A ; . ; . ; . ; . ;
NC_000964.3	128867	G	A	225	hom	234	234	rpoC	gene-BSU_01080	125562	129161	+	synonymous_variant ; rpoC ; c.3306G>A ; p.Ala1102Ala ; 3306/3600 ; 3306/3600 ; 1102/1199 ;	synonymous_variant ; rpoC ; c.3306G>A ; p.Ala1102Ala ; 3306/3600 ; 3306/3600 ; 1102/1199 ;	upstream_gene_variant ; rulS ; c.-473G>A ; . ; . ; . ; . ;	upstream_gene_variant ; rpsL ; c.-835G>A ; . ; . ; . ; . ;	upstream_gene_variant ; rpsG ; c.-1293G>A ; . ; . ; . ; . ;	upstream_gene_variant ; fusA ; c.-1817G>A ; . ; . ; . ; . ;
NC_000964.3	128882	G	A	225	hom	232	232	rpoC	gene-BSU_01080	125562	129161	+	synonymous_variant ; rpoC ; c.3321G>A ; p.Leu1107Leu ; 3321/3600 ; 3321/3600 ; 1107/1199 ;	synonymous_variant ; rpoC ; c.3321G>A ; p.Leu1107Leu ; 3321/3600 ; 3321/3600 ; 1107/1199 ;	upstream_gene_variant ; rulS ; c.-458G>A ; . ; . ; . ; . ;	upstream_gene_variant ; rpsL ; c.-820G>A ; . ; . ; . ; . ;	upstream_gene_variant ; rpsG ; c.-1278G>A ; . ; . ; . ; . ;	upstream_gene_variant ; fusA ; c.-1802G>A ; . ; . ; . ; . ;
NC_000964.3	128894	C	T	225	hom	225	225	rpoC	gene-BSU_01080	125562	129161	+	synonymous_variant ; rpoC ; c.3333C>T ; p.Asn1111Asn ; 3333/3600 ; 3333/3600 ; 1111/1199 ;	synonymous_variant ; rpoC ; c.3333C>T ; p.Asn1111Asn ; 3333/3600 ; 3333/3600 ; 1111/1199 ;	upstream_gene_variant ; rulS ; c.-446C>T ; . ; . ; . ; . ;	upstream_gene_variant ; rpsL ; c.-808C>T ; . ; . ; . ; . ;	upstream_gene_variant ; rpsG ; c.-1266C>T ; . ; . ; . ; . ;	upstream_gene_variant ; fusA ; c.-1790C>T ; . ; . ; . ; . ;
NC_000964.3	128900	A	T	225	hom	223	223	rpoC	gene-BSU_01080	125562	129161	+	synonymous_variant ; rpoC ; c.3339A>T ; p.Pro1113Pro ; 3339/3600 ; 3339/3600 ; 1113/1199 ;	synonymous_variant ; rpoC ; c.3339A>T ; p.Pro1113Pro ; 3339/3600 ; 3339/3600 ; 1113/1199 ;	upstream_gene_variant ; rulS ; c.-440A>T ; . ; . ; . ; . ;	upstream_gene_variant ; rpsL ; c.-802A>T ; . ; . ; . ; . ;	upstream_gene_variant ; rpsG ; c.-1260A>T ; . ; . ; . ; . ;	upstream_gene_variant ; fusA ; c.-1784A>T ; . ; . ; . ; . ;
NC_000964.3	129080	A	T	225	hom	258	258	rpoC	gene-BSU_01080	125562	129161	+	synonymous_variant ; rpoC ; c.3519A>T ; p.Ala1173Ala ; 3519/3600 ; 3519/3600 ; 1173/1199 ;	synonymous_variant ; rpoC ; c.3519A>T ; p.Ala1173Ala ; 3519/3600 ; 3519/3600 ; 1173/1199 ;	upstream_gene_variant ; rulS ; c.-260A>T ; . ; . ; . ; . ;	upstream_gene_variant ; rpsL ; c.-622A>T ; . ; . ; . ; . ;	upstream_gene_variant ; rpsG ; c.-1080A>T ; . ; . ; . ; . ;	upstream_gene_variant ; fusA ; c.-1604A>T ; . ; . ; . ; . ;
NC_000964.3	129171	C	T	225	hom	238	238	.	.	.	.	.	.	upstream_gene_variant ; rulS ; c.-169C>T ; . ; . ; . ; . ;	upstream_gene_variant ; rpsL ; c.-531C>T ; . ; . ; . ; . ;	upstream_gene_variant ; rpsG ; c.-989C>T ; . ; . ; . ; . ;	upstream_gene_variant ; fusA ; c.-1513C>T ; . ; . ; . ; . ;	upstream_gene_variant ; tufA ; c.-3711C>T ; . ; . ; . ; . ;
NC_000964.3	129172	T	G	225	hom	238	238	.	.	.	.	.	.	upstream_gene_variant ; rulS ; c.-168T>G ; . ; . ; . ; . ;	upstream_gene_variant ; rpsL ; c.-530T>G ; . ; . ; . ; . ;	upstream_gene_variant ; rpsG ; c.-988T>G ; . ; . ; . ; . ;	upstream_gene_variant ; fusA ; c.-1512T>G ; . ; . ; . ; . ;	upstream_gene_variant ; tufA ; c.-3710T>G ; . ; . ; . ; . ;
NC_000964.3	129245	T	A	225	hom	272	272	.	.	.	.	.	.	upstream_gene_variant ; rulS ; c.-95T>A ; . ; . ; . ; . ;	upstream_gene_variant ; rpsL ; c.-457T>A ; . ; . ; . ; . ;	upstream_gene_variant ; rpsG ; c.-915T>A ; . ; . ; . ; . ;	upstream_gene_variant ; fusA ; c.-1439T>A ; . ; . ; . ; . ;	upstream_gene_variant ; tufA ; c.-3637T>A ; . ; . ; . ; . ;
NC_000964.3	129624	T	C	225	hom	113	113	.	.	.	.	.	.	upstream_gene_variant ; rpsL ; c.-78T>C ; . ; . ; . ; . ;	upstream_gene_variant ; rpsG ; c.-536T>C ; . ; . ; . ; . ;	upstream_gene_variant ; fusA ; c.-1060T>C ; . ; . ; . ; . ;	upstream_gene_variant ; tufA ; c.-3258T>C ; . ; . ; . ; . ;	upstream_gene_variant ; ybaC ; c.-4547T>C ; . ; . ; . ; . ;
NC_000964.3	129962	G	A	225	hom	376	376	rpsL	gene-BSU_01100	129702	130118	+	synonymous_variant ; rpsL ; c.261G>A ; p.Leu87Leu ; 261/417 ; 261/417 ; 87/138 ;	synonymous_variant ; rpsL ; c.261G>A ; p.Leu87Leu ; 261/417 ; 261/417 ; 87/138 ;	upstream_gene_variant ; rpsG ; c.-198G>A ; . ; . ; . ; . ;	upstream_gene_variant ; fusA ; c.-722G>A ; . ; . ; . ; . ;	upstream_gene_variant ; tufA ; c.-2920G>A ; . ; . ; . ; . ;	upstream_gene_variant ; ybaC ; c.-4209G>A ; . ; . ; . ; . ;
NC_000964.3	130235	T	C	225	hom	324	324	rpsG	gene-BSU_01110	130160	130630	+	synonymous_variant ; rpsG ; c.76T>C ; p.Leu26Leu ; 76/471 ; 76/471 ; 26/156 ;	synonymous_variant ; rpsG ; c.76T>C ; p.Leu26Leu ; 76/471 ; 76/471 ; 26/156 ;	upstream_gene_variant ; fusA ; c.-449T>C ; . ; . ; . ; . ;	upstream_gene_variant ; tufA ; c.-2647T>C ; . ; . ; . ; . ;	upstream_gene_variant ; ybaC ; c.-3936T>C ; . ; . ; . ; . ;	downstream_gene_variant ; rpoB ; c.*4735T>C ; . ; . ; . ; . ;
NC_000964.3	130282	G	A	225	hom	328	328	rpsG	gene-BSU_01110	130160	130630	+	synonymous_variant ; rpsG ; c.123G>A ; p.Thr41Thr ; 123/471 ; 123/471 ; 41/156 ;	synonymous_variant ; rpsG ; c.123G>A ; p.Thr41Thr ; 123/471 ; 123/471 ; 41/156 ;	upstream_gene_variant ; fusA ; c.-402G>A ; . ; . ; . ; . ;	upstream_gene_variant ; tufA ; c.-2600G>A ; . ; . ; . ; . ;	upstream_gene_variant ; ybaC ; c.-3889G>A ; . ; . ; . ; . ;	downstream_gene_variant ; rpoB ; c.*4782G>A ; . ; . ; . ; . ;
NC_000964.3	130492	T	C	225	hom	357	357	rpsG	gene-BSU_01110	130160	130630	+	synonymous_variant ; rpsG ; c.333T>C ; p.Arg111Arg ; 333/471 ; 333/471 ; 111/156 ;	synonymous_variant ; rpsG ; c.333T>C ; p.Arg111Arg ; 333/471 ; 333/471 ; 111/156 ;	upstream_gene_variant ; fusA ; c.-192T>C ; . ; . ; . ; . ;	upstream_gene_variant ; tufA ; c.-2390T>C ; . ; . ; . ; . ;	upstream_gene_variant ; ybaC ; c.-3679T>C ; . ; . ; . ; . ;	upstream_gene_variant ; rpsJ ; c.-4872T>C ; . ; . ; . ; . ;
NC_000964.3	130758	T	A	225	hom	364	364	fusA	gene-BSU_01120	130684	132762	+	synonymous_variant ; fusA ; c.75T>A ; p.Thr25Thr ; 75/2079 ; 75/2079 ; 25/692 ;	synonymous_variant ; fusA ; c.75T>A ; p.Thr25Thr ; 75/2079 ; 75/2079 ; 25/692 ;	upstream_gene_variant ; tufA ; c.-2124T>A ; . ; . ; . ; . ;	upstream_gene_variant ; ybaC ; c.-3413T>A ; . ; . ; . ; . ;	upstream_gene_variant ; rpsJ ; c.-4606T>A ; . ; . ; . ; . ;	upstream_gene_variant ; rplC ; c.-4954T>A ; . ; . ; . ; . ;
NC_000964.3	130887	T	A	225	hom	356	356	fusA	gene-BSU_01120	130684	132762	+	synonymous_variant ; fusA ; c.204T>A ; p.Thr68Thr ; 204/2079 ; 204/2079 ; 68/692 ;	synonymous_variant ; fusA ; c.204T>A ; p.Thr68Thr ; 204/2079 ; 204/2079 ; 68/692 ;	upstream_gene_variant ; tufA ; c.-1995T>A ; . ; . ; . ; . ;	upstream_gene_variant ; ybaC ; c.-3284T>A ; . ; . ; . ; . ;	upstream_gene_variant ; rpsJ ; c.-4477T>A ; . ; . ; . ; . ;	upstream_gene_variant ; rplC ; c.-4825T>A ; . ; . ; . ; . ;
NC_000964.3	131466	C	T	225	hom	229	229	fusA	gene-BSU_01120	130684	132762	+	synonymous_variant ; fusA ; c.783C>T ; p.Ala261Ala ; 783/2079 ; 783/2079 ; 261/692 ;	synonymous_variant ; fusA ; c.783C>T ; p.Ala261Ala ; 783/2079 ; 783/2079 ; 261/692 ;	upstream_gene_variant ; tufA ; c.-1416C>T ; . ; . ; . ; . ;	upstream_gene_variant ; ybaC ; c.-2705C>T ; . ; . ; . ; . ;	upstream_gene_variant ; rpsJ ; c.-3898C>T ; . ; . ; . ; . ;	upstream_gene_variant ; rplC ; c.-4246C>T ; . ; . ; . ; . ;
NC_000964.3	132102	T	C	225	hom	248	248	fusA	gene-BSU_01120	130684	132762	+	synonymous_variant ; fusA ; c.1419T>C ; p.Asn473Asn ; 1419/2079 ; 1419/2079 ; 473/692 ;	synonymous_variant ; fusA ; c.1419T>C ; p.Asn473Asn ; 1419/2079 ; 1419/2079 ; 473/692 ;	upstream_gene_variant ; tufA ; c.-780T>C ; . ; . ; . ; . ;	upstream_gene_variant ; ybaC ; c.-2069T>C ; . ; . ; . ; . ;	upstream_gene_variant ; rpsJ ; c.-3262T>C ; . ; . ; . ; . ;	upstream_gene_variant ; rplC ; c.-3610T>C ; . ; . ; . ; . ;
NC_000964.3	132276	C	T	225	hom	164	164	fusA	gene-BSU_01120	130684	132762	+	synonymous_variant ; fusA ; c.1593C>T ; p.Val531Val ; 1593/2079 ; 1593/2079 ; 531/692 ;	synonymous_variant ; fusA ; c.1593C>T ; p.Val531Val ; 1593/2079 ; 1593/2079 ; 531/692 ;	upstream_gene_variant ; tufA ; c.-606C>T ; . ; . ; . ; . ;	upstream_gene_variant ; ybaC ; c.-1895C>T ; . ; . ; . ; . ;	upstream_gene_variant ; rpsJ ; c.-3088C>T ; . ; . ; . ; . ;	upstream_gene_variant ; rplC ; c.-3436C>T ; . ; . ; . ; . ;
NC_000964.3	132327	C	T	225	hom	174	174	fusA	gene-BSU_01120	130684	132762	+	synonymous_variant ; fusA ; c.1644C>T ; p.Leu548Leu ; 1644/2079 ; 1644/2079 ; 548/692 ;	synonymous_variant ; fusA ; c.1644C>T ; p.Leu548Leu ; 1644/2079 ; 1644/2079 ; 548/692 ;	upstream_gene_variant ; tufA ; c.-555C>T ; . ; . ; . ; . ;	upstream_gene_variant ; ybaC ; c.-1844C>T ; . ; . ; . ; . ;	upstream_gene_variant ; rpsJ ; c.-3037C>T ; . ; . ; . ; . ;	upstream_gene_variant ; rplC ; c.-3385C>T ; . ; . ; . ; . ;
NC_000964.3	132429	C	T	225	hom	204	204	fusA	gene-BSU_01120	130684	132762	+	synonymous_variant ; fusA ; c.1746C>T ; p.Val582Val ; 1746/2079 ; 1746/2079 ; 582/692 ;	synonymous_variant ; fusA ; c.1746C>T ; p.Val582Val ; 1746/2079 ; 1746/2079 ; 582/692 ;	upstream_gene_variant ; tufA ; c.-453C>T ; . ; . ; . ; . ;	upstream_gene_variant ; ybaC ; c.-1742C>T ; . ; . ; . ; . ;	upstream_gene_variant ; rpsJ ; c.-2935C>T ; . ; . ; . ; . ;	upstream_gene_variant ; rplC ; c.-3283C>T ; . ; . ; . ; . ;
NC_000964.3	132501	G	A	225	hom	262	262	fusA	gene-BSU_01120	130684	132762	+	synonymous_variant ; fusA ; c.1818G>A ; p.Val606Val ; 1818/2079 ; 1818/2079 ; 606/692 ;	synonymous_variant ; fusA ; c.1818G>A ; p.Val606Val ; 1818/2079 ; 1818/2079 ; 606/692 ;	upstream_gene_variant ; tufA ; c.-381G>A ; . ; . ; . ; . ;	upstream_gene_variant ; ybaC ; c.-1670G>A ; . ; . ; . ; . ;	upstream_gene_variant ; rpsJ ; c.-2863G>A ; . ; . ; . ; . ;	upstream_gene_variant ; rplC ; c.-3211G>A ; . ; . ; . ; . ;
NC_000964.3	132525	T	C	225	hom	288	288	fusA	gene-BSU_01120	130684	132762	+	synonymous_variant ; fusA ; c.1842T>C ; p.Tyr614Tyr ; 1842/2079 ; 1842/2079 ; 614/692 ;	synonymous_variant ; fusA ; c.1842T>C ; p.Tyr614Tyr ; 1842/2079 ; 1842/2079 ; 614/692 ;	upstream_gene_variant ; tufA ; c.-357T>C ; . ; . ; . ; . ;	upstream_gene_variant ; ybaC ; c.-1646T>C ; . ; . ; . ; . ;	upstream_gene_variant ; rpsJ ; c.-2839T>C ; . ; . ; . ; . ;	upstream_gene_variant ; rplC ; c.-3187T>C ; . ; . ; . ; . ;
NC_000964.3	132609	T	C	225	hom	298	298	fusA	gene-BSU_01120	130684	132762	+	synonymous_variant ; fusA ; c.1926T>C ; p.Arg642Arg ; 1926/2079 ; 1926/2079 ; 642/692 ;	synonymous_variant ; fusA ; c.1926T>C ; p.Arg642Arg ; 1926/2079 ; 1926/2079 ; 642/692 ;	upstream_gene_variant ; tufA ; c.-273T>C ; . ; . ; . ; . ;	upstream_gene_variant ; ybaC ; c.-1562T>C ; . ; . ; . ; . ;	upstream_gene_variant ; rpsJ ; c.-2755T>C ; . ; . ; . ; . ;	upstream_gene_variant ; rplC ; c.-3103T>C ; . ; . ; . ; . ;
NC_000964.3	133055	C	T	225	hom	362	362	tufA	gene-BSU_01130	132882	134072	+	synonymous_variant ; tufA ; c.174C>T ; p.Arg58Arg ; 174/1191 ; 174/1191 ; 58/396 ;	synonymous_variant ; tufA ; c.174C>T ; p.Arg58Arg ; 174/1191 ; 174/1191 ; 58/396 ;	upstream_gene_variant ; ybaC ; c.-1116C>T ; . ; . ; . ; . ;	upstream_gene_variant ; rpsJ ; c.-2309C>T ; . ; . ; . ; . ;	upstream_gene_variant ; rplC ; c.-2657C>T ; . ; . ; . ; . ;	upstream_gene_variant ; rplD ; c.-3314C>T ; . ; . ; . ; . ;
NC_000964.3	133175	G	T	228	hom	365	363	tufA	gene-BSU_01130	132882	134072	+	synonymous_variant ; tufA ; c.294G>T ; p.Ala98Ala ; 294/1191 ; 294/1191 ; 98/396 ;	synonymous_variant ; tufA ; c.294G>T ; p.Ala98Ala ; 294/1191 ; 294/1191 ; 98/396 ;	upstream_gene_variant ; ybaC ; c.-996G>T ; . ; . ; . ; . ;	upstream_gene_variant ; rpsJ ; c.-2189G>T ; . ; . ; . ; . ;	upstream_gene_variant ; rplC ; c.-2537G>T ; . ; . ; . ; . ;	upstream_gene_variant ; rplD ; c.-3194G>T ; . ; . ; . ; . ;
NC_000964.3	133691	C	T	225	hom	238	238	tufA	gene-BSU_01130	132882	134072	+	synonymous_variant ; tufA ; c.810C>T ; p.Tyr270Tyr ; 810/1191 ; 810/1191 ; 270/396 ;	synonymous_variant ; tufA ; c.810C>T ; p.Tyr270Tyr ; 810/1191 ; 810/1191 ; 270/396 ;	upstream_gene_variant ; ybaC ; c.-480C>T ; . ; . ; . ; . ;	upstream_gene_variant ; rpsJ ; c.-1673C>T ; . ; . ; . ; . ;	upstream_gene_variant ; rplC ; c.-2021C>T ; . ; . ; . ; . ;	upstream_gene_variant ; rplD ; c.-2678C>T ; . ; . ; . ; . ;
NC_000964.3	133919	T	C	225	hom	198	198	tufA	gene-BSU_01130	132882	134072	+	synonymous_variant ; tufA ; c.1038T>C ; p.Leu346Leu ; 1038/1191 ; 1038/1191 ; 346/396 ;	synonymous_variant ; tufA ; c.1038T>C ; p.Leu346Leu ; 1038/1191 ; 1038/1191 ; 346/396 ;	upstream_gene_variant ; ybaC ; c.-252T>C ; . ; . ; . ; . ;	upstream_gene_variant ; rpsJ ; c.-1445T>C ; . ; . ; . ; . ;	upstream_gene_variant ; rplC ; c.-1793T>C ; . ; . ; . ; . ;	upstream_gene_variant ; rplD ; c.-2450T>C ; . ; . ; . ; . ;
NC_000964.3	134080	G	A	225	hom	140	140	.	.	.	.	.	.	upstream_gene_variant ; ybaC ; c.-91G>A ; . ; . ; . ; . ;	upstream_gene_variant ; rpsJ ; c.-1284G>A ; . ; . ; . ; . ;	upstream_gene_variant ; rplC ; c.-1632G>A ; . ; . ; . ; . ;	upstream_gene_variant ; rplD ; c.-2289G>A ; . ; . ; . ; . ;	upstream_gene_variant ; rplW ; c.-2912G>A ; . ; . ; . ; . ;
NC_000964.3	134099	T	C	225	hom	129	129	.	.	.	.	.	.	upstream_gene_variant ; ybaC ; c.-72T>C ; . ; . ; . ; . ;	upstream_gene_variant ; rpsJ ; c.-1265T>C ; . ; . ; . ; . ;	upstream_gene_variant ; rplC ; c.-1613T>C ; . ; . ; . ; . ;	upstream_gene_variant ; rplD ; c.-2270T>C ; . ; . ; . ; . ;	upstream_gene_variant ; rplW ; c.-2893T>C ; . ; . ; . ; . ;
NC_000964.3	134210	C	A	225	hom	99	99	ybaC	gene-BSU_01140	134171	135127	+	missense_variant ; ybaC ; c.40C>A ; p.Leu14Ile ; 40/957 ; 40/957 ; 14/318 ;	missense_variant ; ybaC ; c.40C>A ; p.Leu14Ile ; 40/957 ; 40/957 ; 14/318 ;	upstream_gene_variant ; rpsJ ; c.-1154C>A ; . ; . ; . ; . ;	upstream_gene_variant ; rplC ; c.-1502C>A ; . ; . ; . ; . ;	upstream_gene_variant ; rplD ; c.-2159C>A ; . ; . ; . ; . ;	upstream_gene_variant ; rplW ; c.-2782C>A ; . ; . ; . ; . ;
NC_000964.3	134253	T	A	225	hom	96	96	ybaC	gene-BSU_01140	134171	135127	+	missense_variant ; ybaC ; c.83T>A ; p.Val28Asp ; 83/957 ; 83/957 ; 28/318 ;	missense_variant ; ybaC ; c.83T>A ; p.Val28Asp ; 83/957 ; 83/957 ; 28/318 ;	upstream_gene_variant ; rpsJ ; c.-1111T>A ; . ; . ; . ; . ;	upstream_gene_variant ; rplC ; c.-1459T>A ; . ; . ; . ; . ;	upstream_gene_variant ; rplD ; c.-2116T>A ; . ; . ; . ; . ;	upstream_gene_variant ; rplW ; c.-2739T>A ; . ; . ; . ; . ;
NC_000964.3	134515	T	G	225	hom	124	124	ybaC	gene-BSU_01140	134171	135127	+	synonymous_variant ; ybaC ; c.345T>G ; p.Ser115Ser ; 345/957 ; 345/957 ; 115/318 ;	synonymous_variant ; ybaC ; c.345T>G ; p.Ser115Ser ; 345/957 ; 345/957 ; 115/318 ;	upstream_gene_variant ; rpsJ ; c.-849T>G ; . ; . ; . ; . ;	upstream_gene_variant ; rplC ; c.-1197T>G ; . ; . ; . ; . ;	upstream_gene_variant ; rplD ; c.-1854T>G ; . ; . ; . ; . ;	upstream_gene_variant ; rplW ; c.-2477T>G ; . ; . ; . ; . ;
NC_000964.3	134521	A	G	225	hom	122	122	ybaC	gene-BSU_01140	134171	135127	+	synonymous_variant ; ybaC ; c.351A>G ; p.Gly117Gly ; 351/957 ; 351/957 ; 117/318 ;	synonymous_variant ; ybaC ; c.351A>G ; p.Gly117Gly ; 351/957 ; 351/957 ; 117/318 ;	upstream_gene_variant ; rpsJ ; c.-843A>G ; . ; . ; . ; . ;	upstream_gene_variant ; rplC ; c.-1191A>G ; . ; . ; . ; . ;	upstream_gene_variant ; rplD ; c.-1848A>G ; . ; . ; . ; . ;	upstream_gene_variant ; rplW ; c.-2471A>G ; . ; . ; . ; . ;
[truncated: 47,965 more rows]
